# Supplementary material
Source: PubMed Central journal article supplement (PMC8322939)
Supplement: mmc1.pdf [file mmc1.pdf]

**The American Journal of Human Genetics, Volume 108**

**Supplemental information**

**Constrained maximum likelihood-based  
Mendelian randomization robust to both  
correlated and uncorrelated pleiotropic effects**

**Haoran Xue, Xiaotong Shen, and Wei Pan**

# Supplemental Figures

## Figure S1: BIC and scatter plot: Asthma

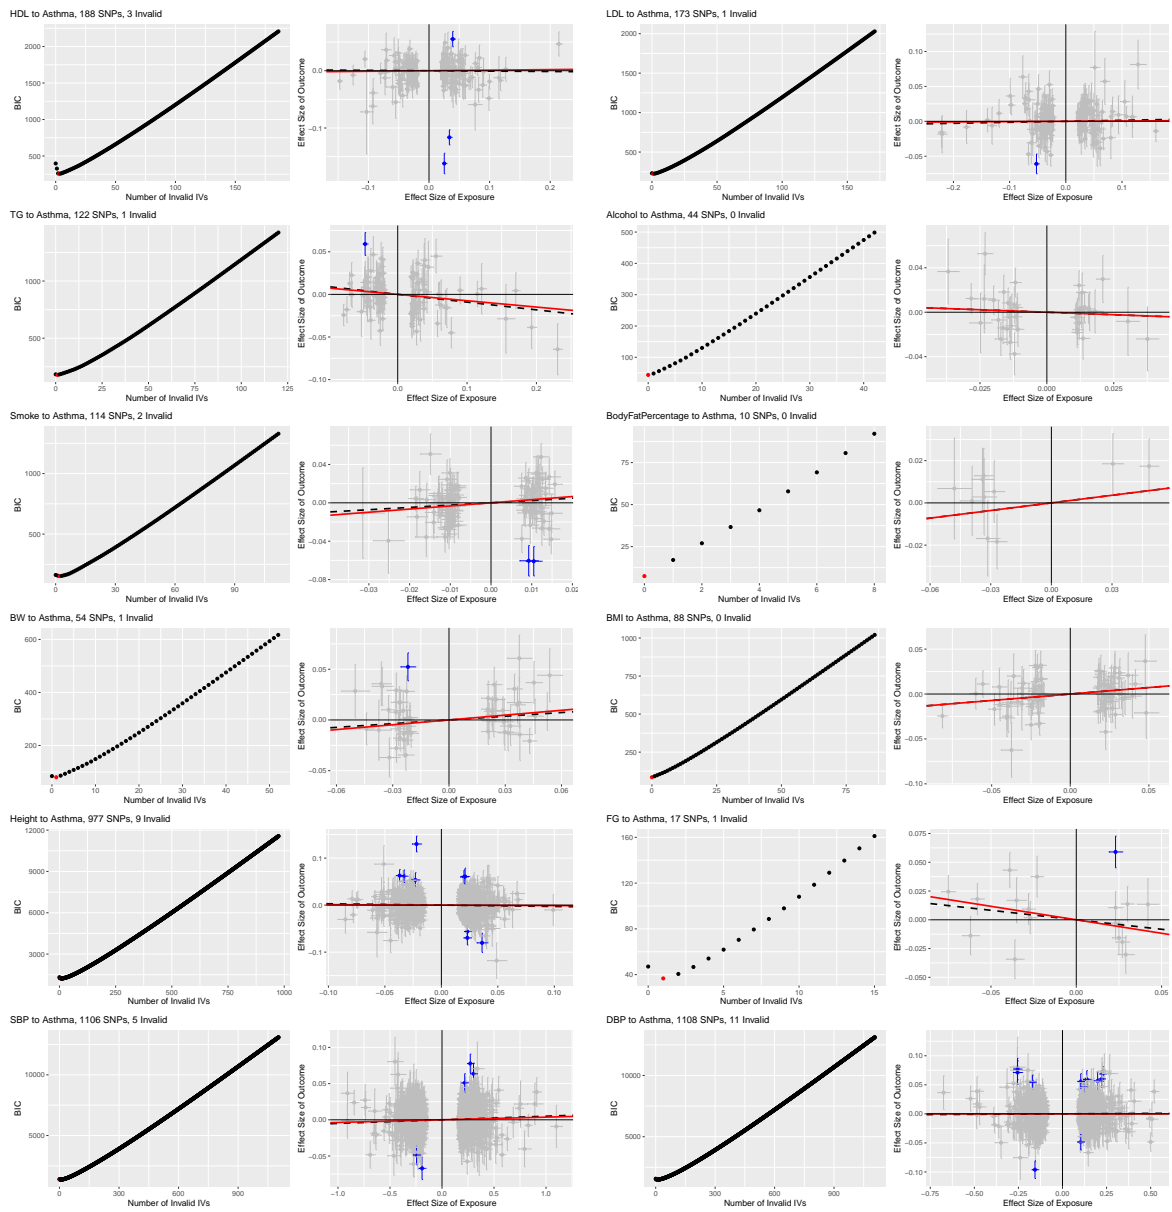

Figure S2: BIC and scatter plot: CAD

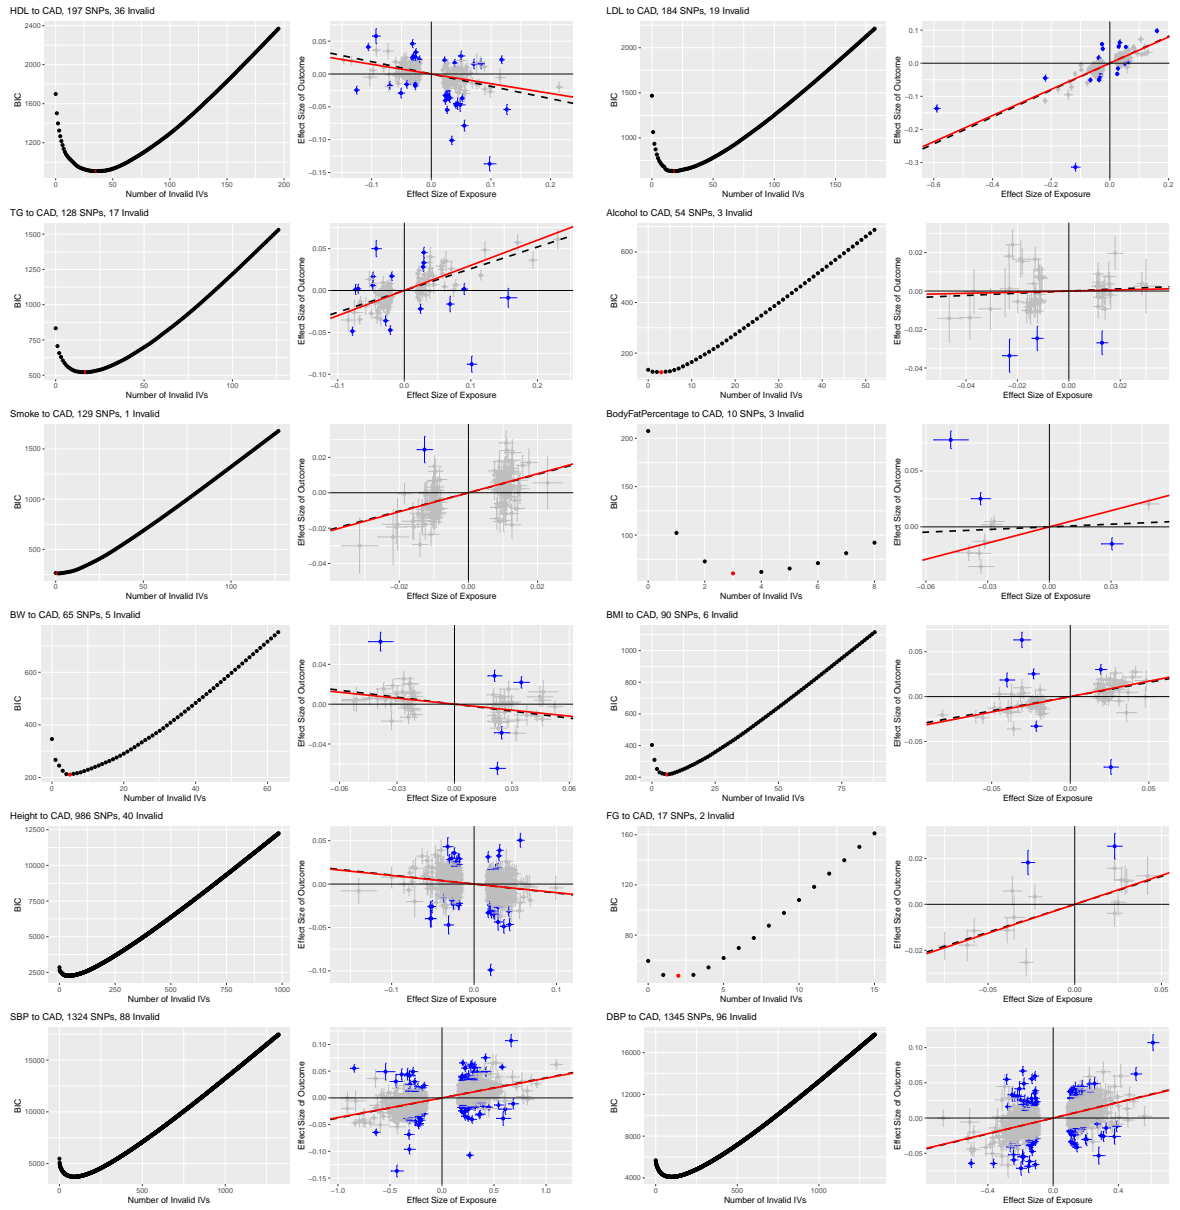

Figure S3: BIC and scatter plot: Stroke

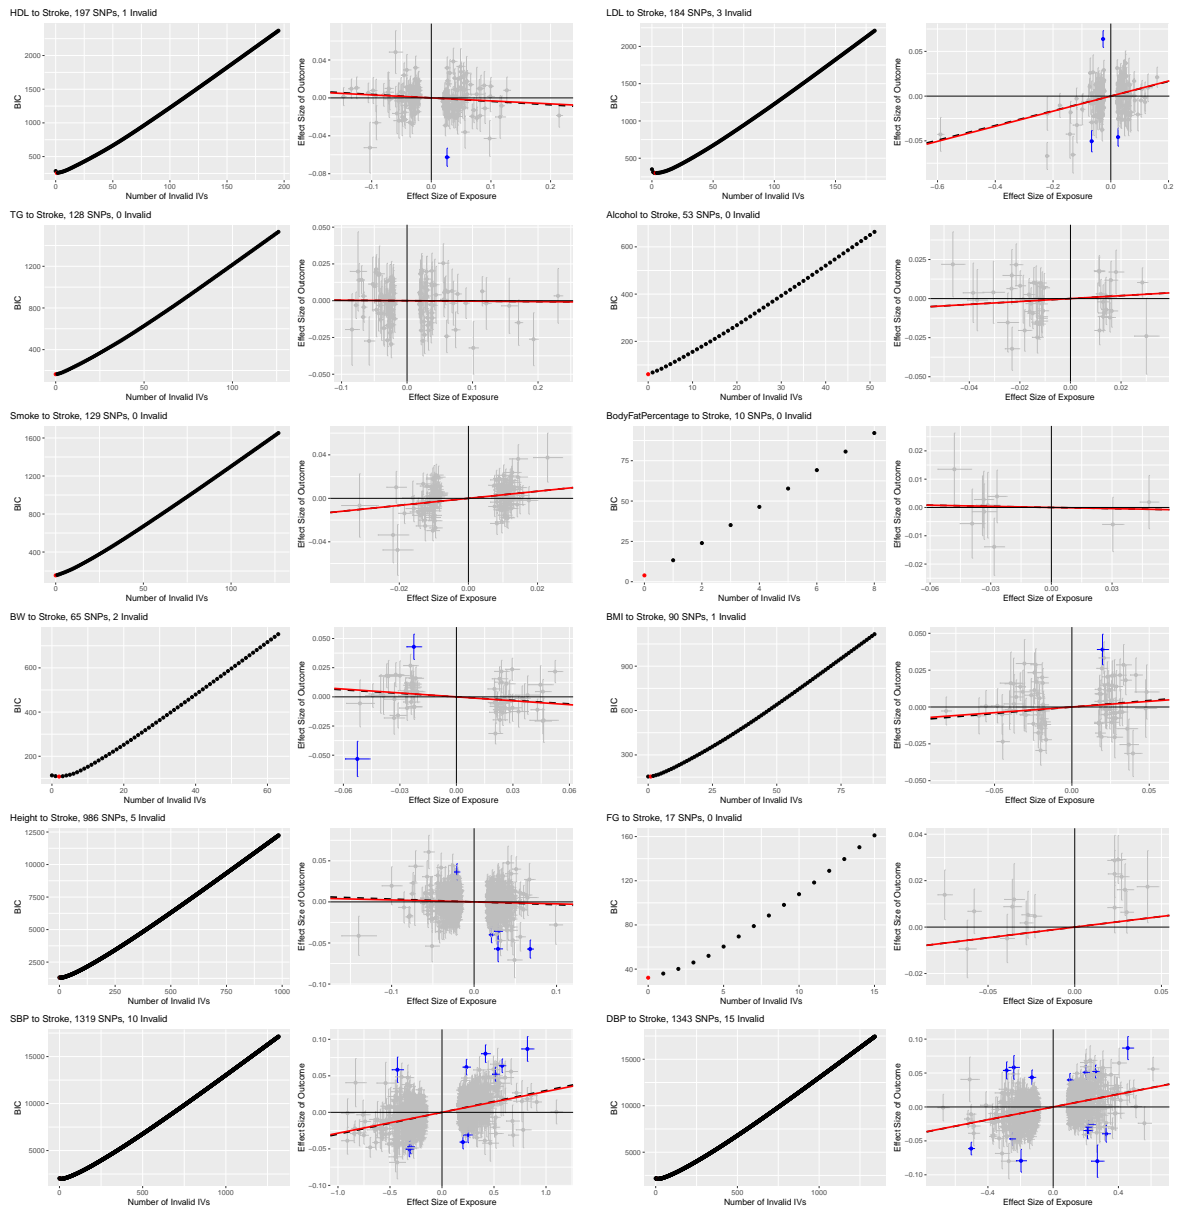

Figure S4: BIC and scatter plot: T2D

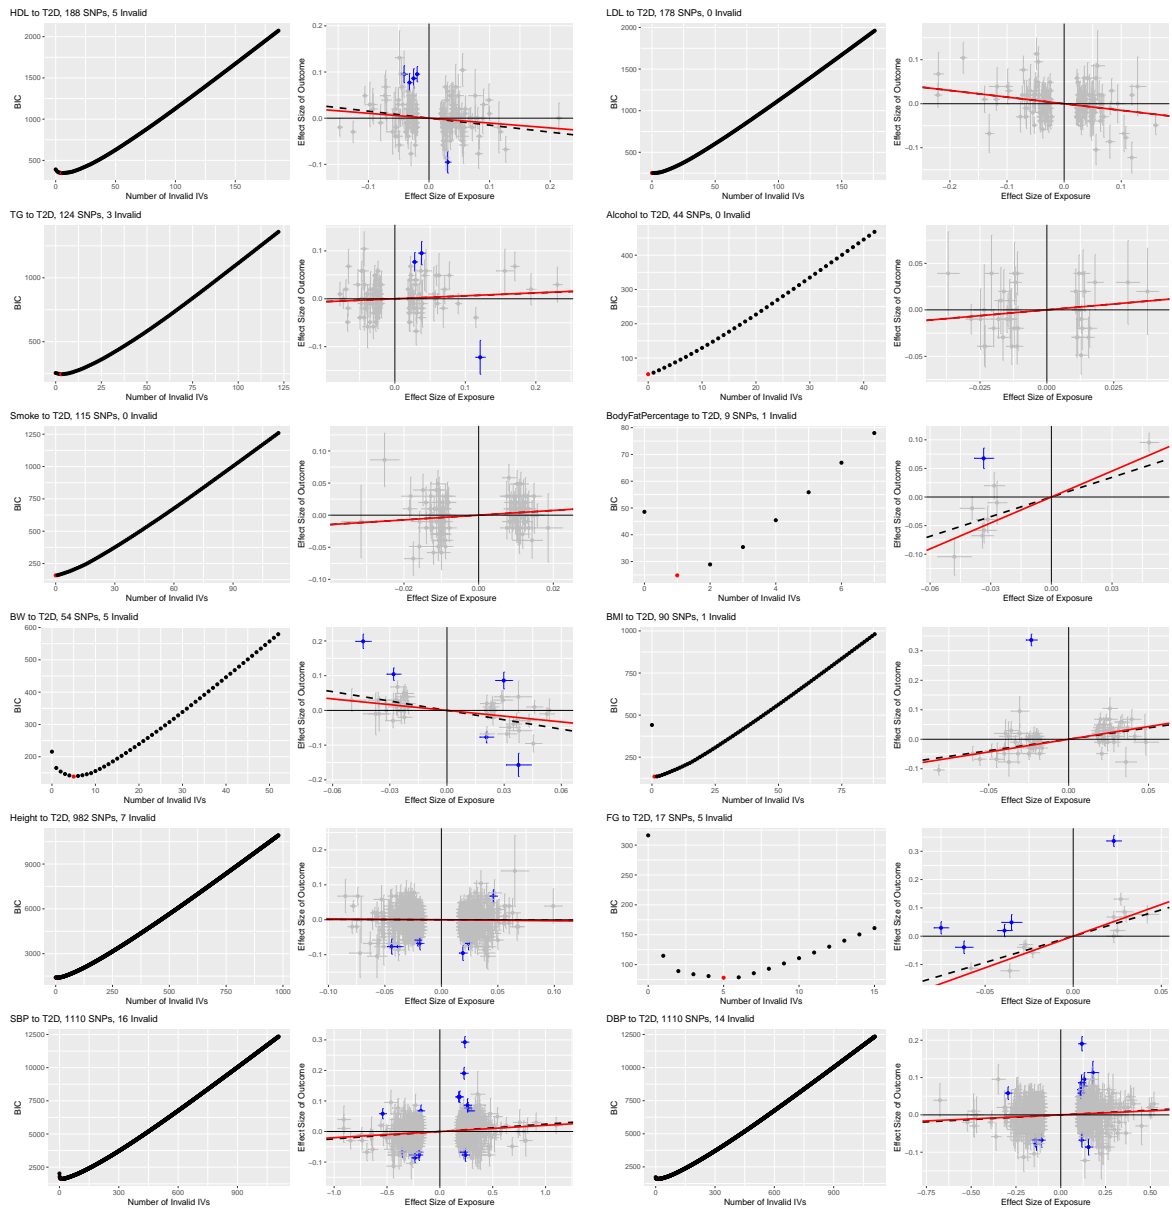

Figure S5: 53 trait pairs in secondary real data analysis: Q-Q plots for all 14 methods.

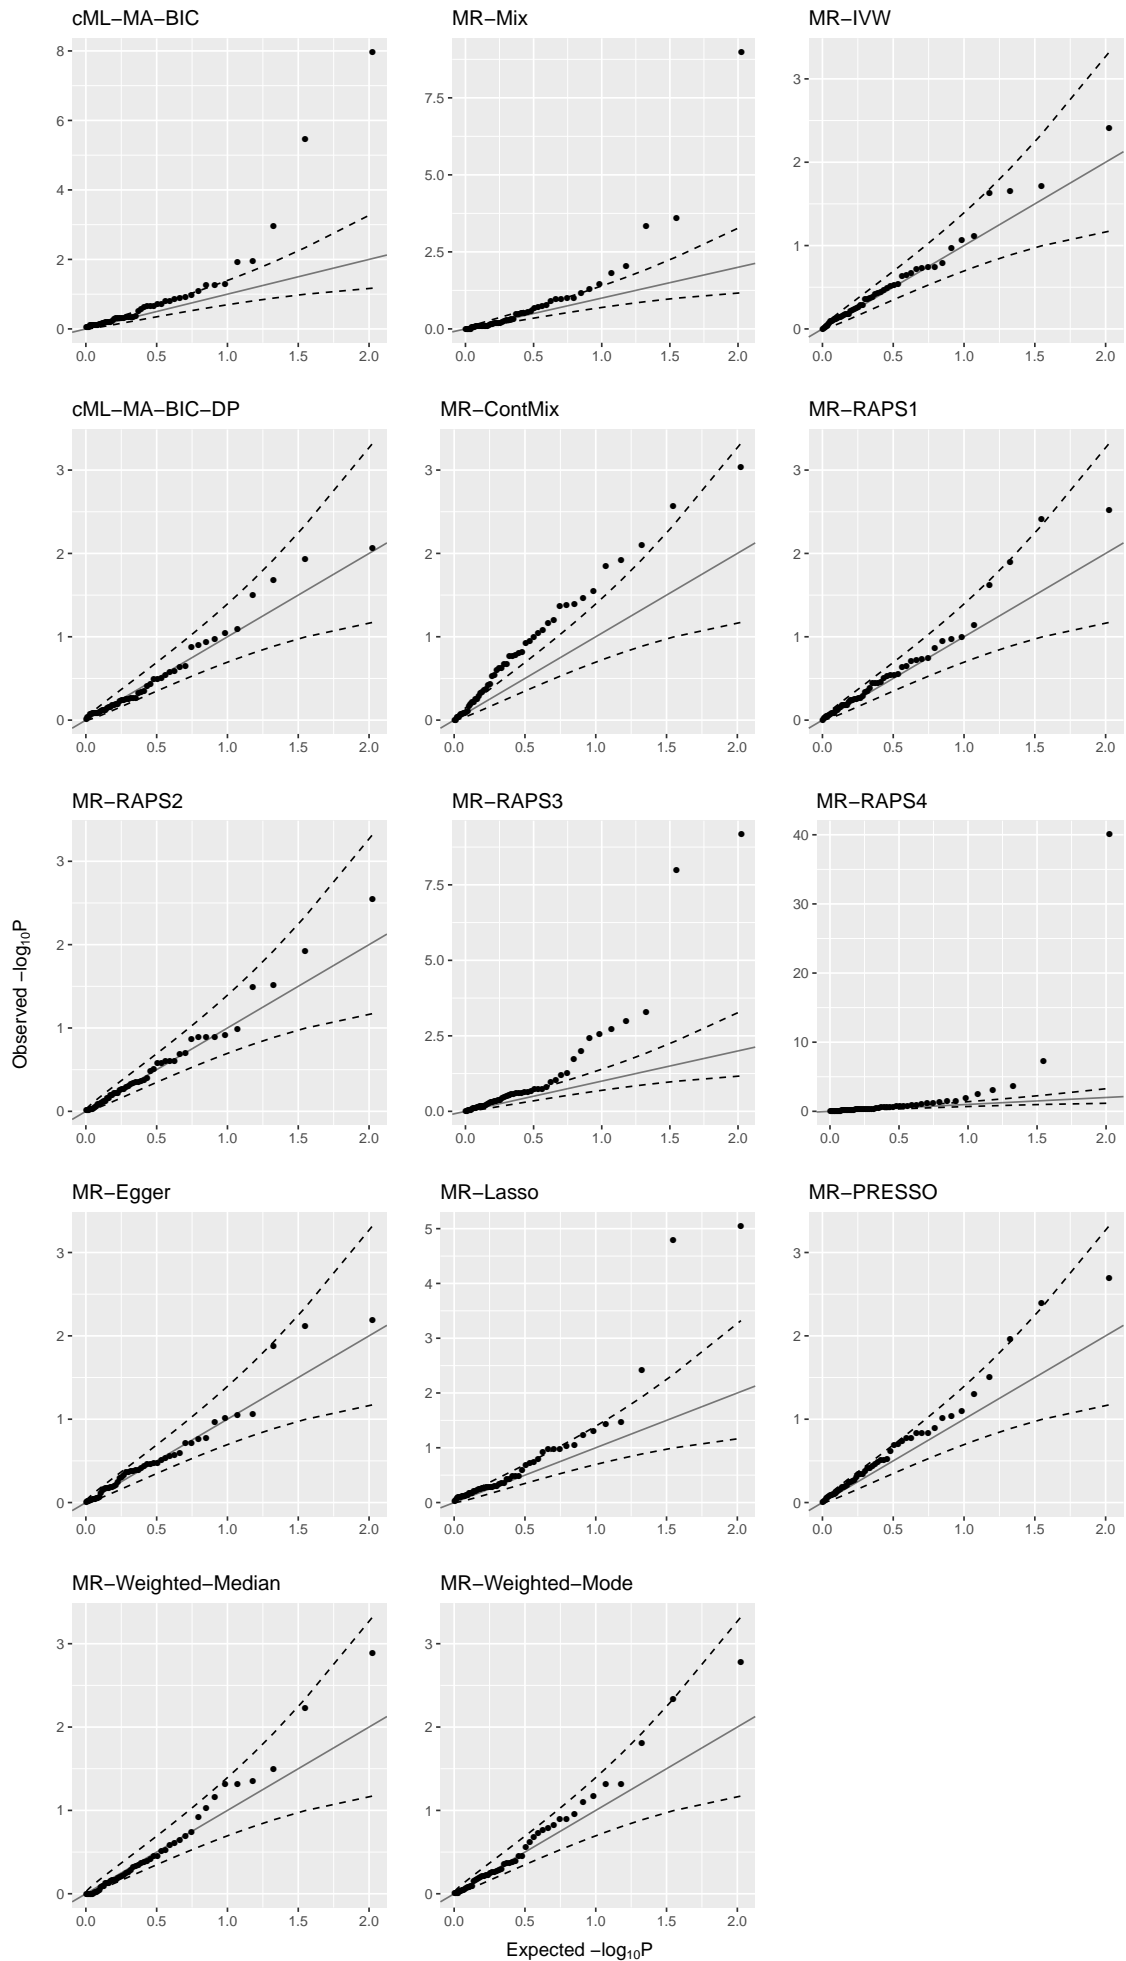

Figure S6: Main simulations: the empirical type-I error rates at the nominal level of 0.05 with sample size  $n = 50000$  and with  $m = 10$  or  $100$  SNPs, among which 0 to 60% were invalid IVs with the InSIDE assumption either holding or violated. The results were based on 10,000 simulations.

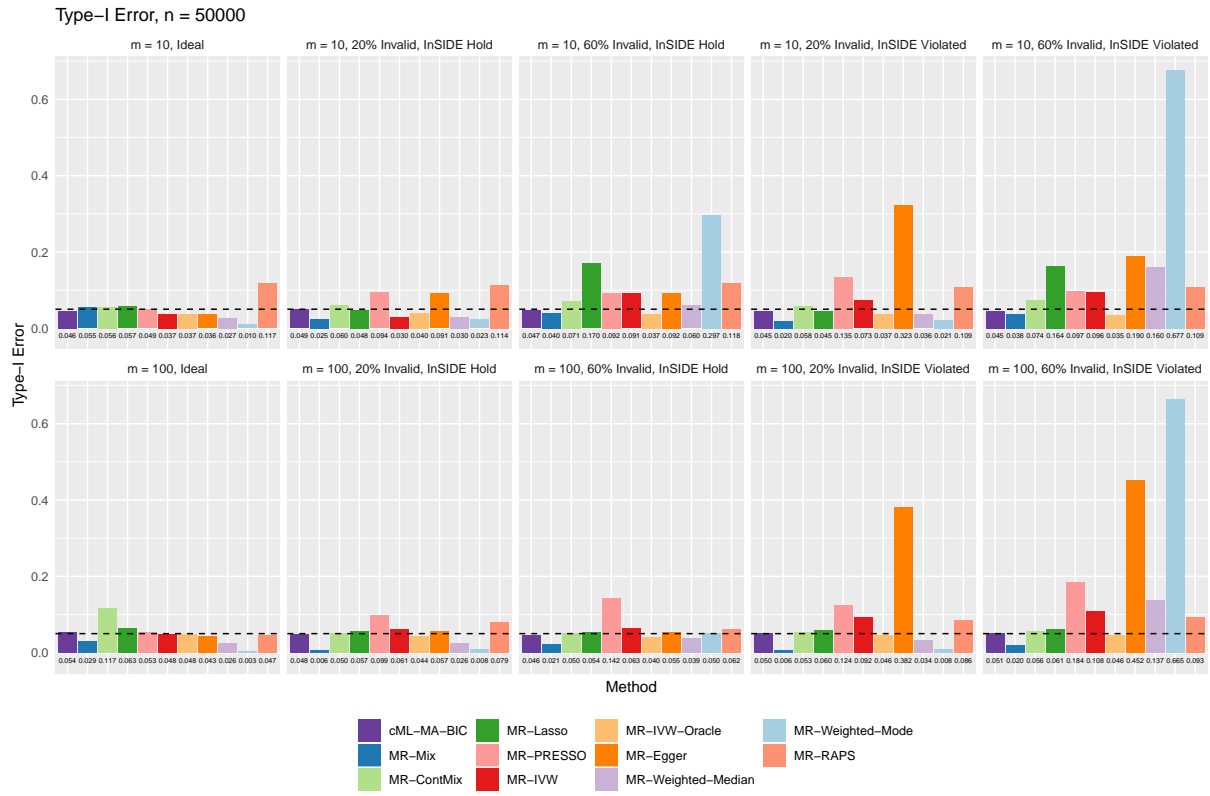

Figure S7: Secondary simulations: empirical type-I error rates (for  $\theta = 0$ ) and power (for  $\theta \neq 0$ ) with sample size  $n = 50000$  or  $100000$ , and with  $m = 10$  or  $100$  exposure-associated SNPs. The  $p$ -value cutoff  $0.001$  was used for CAUSE to select IVs.

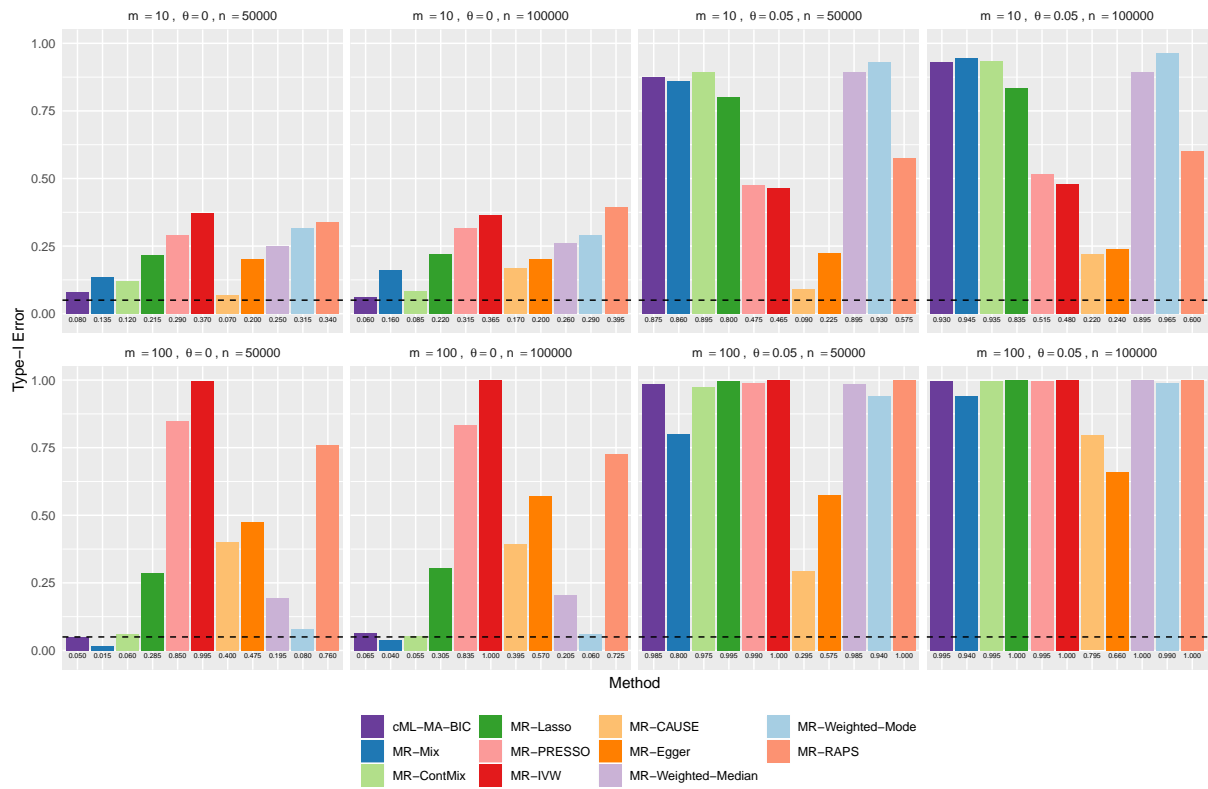



Figure S8: Secondary simulations: empirical type-I error rates (for  $\theta = 0$ ) and power (for  $\theta \neq 0$ ) with sample size  $n = 50000$  or  $100000$ , and with  $m = 10$  or  $100$  exposure-associated SNPs. The  $p$ -value cutoff  $5 \times 10^{-8}$  was used for CAUSE to select IVs.

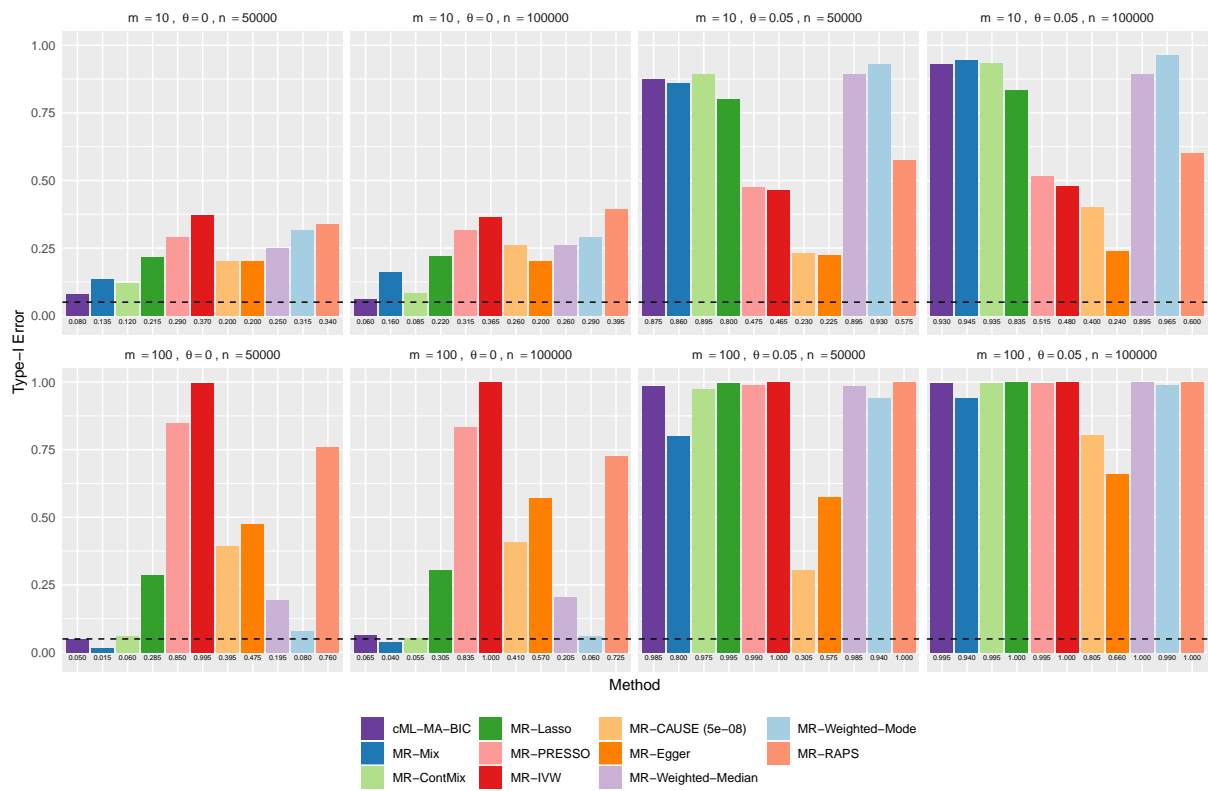









Table S5: For each pair of exposure and outcome, from top to bottom are number of IVs used, number of invalid IVs detected by cML-BIC, and proportion of detected invalid IVs. Results are got with one starting point set at 0, and 100 randomly generated starting points.

| Exposure \ Outcome | HDL             | LDL             | TG              | Alcohol      | Smoke         | BF            | BW           | BMI          | Height         | FG            | SBP             | DBP             |
|--------------------|-----------------|-----------------|-----------------|--------------|---------------|---------------|--------------|--------------|----------------|---------------|-----------------|-----------------|
| Asthma             | 188, 3, 1.60%   | 173, 1, 0.58%   | 122, 1, 0.82%   | 44, 0, 0.00% | 114, 2, 1.75% | 10, 0, 0.00%  | 54, 1, 1.85% | 88, 0, 0.00% | 977, 9, 0.92%  | 17, 1, 5.88%  | 1106, 5, 0.45%  | 1108, 11, 0.99% |
| CAD                | 197, 36, 18.27% | 184, 19, 10.33% | 128, 17, 13.28% | 54, 3, 5.56% | 129, 1, 0.78% | 10, 3, 30.00% | 65, 5, 7.69% | 90, 6, 6.67% | 986, 40, 4.06% | 17, 2, 11.76% | 1324, 88, 6.65% | 1345, 96, 7.14% |
| Stroke             | 197, 1, 0.51%   | 184, 3, 1.63%   | 128, 0, 0.00%   | 53, 0, 0.00% | 129, 0, 0.00% | 10, 0, 0.00%  | 65, 2, 3.08% | 90, 1, 1.11% | 986, 5, 0.51%  | 17, 0, 0.00%  | 1319, 10, 0.76% | 1343, 15, 1.12% |
| T2D                | 188, 5, 2.66%   | 178, 0, 0.00%   | 124, 3, 2.42%   | 44, 0, 0.00% | 115, 0, 0.00% | 9, 1, 11.11%  | 54, 5, 9.26% | 90, 1, 1.11% | 982, 7, 0.71%  | 17, 5, 29.41% | 1110, 16, 1.44% | 1110, 14, 1.26% |

Table S6: For each pair of exposure and outcome, from top to bottom are number of IVs used, number of invalid IVs detected by cML-BIC, and proportion of detected invalid IVs. Results are got with one starting point set at 0.

| Exposure \ Outcome | HDL             | LDL             | TG              | Alcohol      | Smoke         | BF            | BW           | BMI          | Height         | FG            | SBP             | DBP             |
|--------------------|-----------------|-----------------|-----------------|--------------|---------------|---------------|--------------|--------------|----------------|---------------|-----------------|-----------------|
| Asthma             | 188, 3, 1.60%   | 173, 1, 0.58%   | 122, 1, 0.82%   | 44, 0, 0.00% | 114, 2, 1.75% | 10, 0, 0.00%  | 54, 1, 1.85% | 88, 0, 0.00% | 977, 9, 0.92%  | 17, 1, 5.88%  | 1106, 5, 0.45%  | 1108, 11, 0.99% |
| CAD                | 197, 37, 18.78% | 184, 19, 10.33% | 128, 15, 11.72% | 54, 3, 5.56% | 129, 1, 0.78% | 10, 4, 40.00% | 65, 5, 7.69% | 90, 6, 6.67% | 986, 41, 4.16% | 17, 2, 11.76% | 1324, 89, 6.72% | 1345, 96, 7.14% |
| Stroke             | 197, 1, 0.51%   | 184, 3, 1.63%   | 128, 0, 0.00%   | 53, 0, 0.00% | 129, 0, 0.00% | 10, 0, 0.00%  | 65, 2, 3.08% | 90, 1, 1.11% | 986, 5, 0.51%  | 17, 0, 0.00%  | 1319, 10, 0.76% | 1343, 15, 1.12% |
| T2D                | 188, 5, 2.66%   | 178, 0, 0.00%   | 124, 3, 2.42%   | 44, 0, 0.00% | 115, 0, 0.00% | 9, 1, 11.11%  | 54, 5, 9.26% | 90, 1, 1.11% | 982, 8, 0.81%  | 17, 3, 17.65% | 1110, 16, 1.44% | 1110, 14, 1.26% |

Table S7: Goodness-of-fit tests for Asthma: the cells with the p-values less than the Bonferroni adjusted significance cutoff 0.001 are marked with red.

| Method \ Exposure | HDL     | LDL     | TG      | Alcohol | Smoke   | BF      | BW      | BMI     | Height  | FG      | SBP     | DBP     |
|-------------------|---------|---------|---------|---------|---------|---------|---------|---------|---------|---------|---------|---------|
| GOF1-Max          | 6.1e-01 | 7.8e-02 | 3.6e-02 | 2.4e-01 | 2.9e-02 | 3.7e-01 | 8.0e-02 | 2.4e-01 | 2.6e-01 | 7.8e-02 | 4.0e-01 | 3.9e-02 |
| GOF2-Max          | 6.4e-01 | 1.0e-01 | 5.2e-02 | 2.5e-01 | 3.0e-02 | 3.6e-01 | 7.2e-02 | 2.9e-01 | 2.7e-01 | 8.0e-02 | 4.0e-01 | 3.5e-02 |
| GOF1              | 6.1e-01 | 7.8e-02 | 3.6e-02 | 2.4e-01 | 2.9e-02 | 3.7e-01 | 8.0e-02 | 2.4e-01 | 2.5e-01 | 7.8e-02 | 4.8e-02 | 8.9e-03 |
| GOF2              | 6.4e-01 | 1.0e-01 | 5.2e-02 | 2.5e-01 | 3.0e-02 | 3.6e-01 | 7.2e-02 | 2.9e-01 | 2.6e-01 | 8.0e-02 | 5.9e-02 | 8.7e-03 |

Table S8: Goodness-of-fit tests for CAD: the cells with the p-values less than the Bonferroni adjusted significance cutoff 0.001 are marked with red.

| Method \ Exposure | HDL     | LDL     | TG      | Alcohol | Smoke   | BF      | BW      | BMI     | Height  | FG      | SBP     | DBP     |
|-------------------|---------|---------|---------|---------|---------|---------|---------|---------|---------|---------|---------|---------|
| GOF1-Max          | 2.6e-14 | 1.1e-16 | 8.7e-13 | 1.2e-07 | 5.2e-01 | 8.2e-06 | 8.5e-06 | 6.9e-04 | 1.9e-03 | 1.6e-08 | 5.2e-14 | 3.1e-11 |
| GOF2-Max          | 2.5e-16 | 4.7e-14 | 3.6e-16 | 4.3e-08 | 5.6e-01 | 1.4e-09 | 2.5e-06 | 2.2e-03 | 1.0e-03 | 2.1e-06 | 1.8e-12 | 4.8e-10 |
| GOF1              | 2.7e-14 | 1.6e-14 | 7.5e-18 | 1.2e-07 | 5.2e-01 | 8.2e-06 | 8.5e-06 | 6.9e-04 | 1.7e-07 | 4.5e-06 | 1.3e-12 | 9.8e-11 |
| GOF2              | 8.3e-19 | 2.3e-17 | 3.7e-18 | 4.3e-08 | 5.6e-01 | 1.4e-09 | 2.5e-06 | 2.2e-03 | 4.0e-07 | 8.4e-06 | 9.0e-11 | 2.8e-11 |

Table S9: Goodness-of-fit tests for Stroke: the cells with the p-values less than the Bonferroni adjusted significance cutoff 0.001 are marked with red.

| Method \ Exposure | HDL     | LDL     | TG      | Alcohol | Smoke   | BF      | BW      | BMI     | Height  | FG      | SBP     | DBP     |
|-------------------|---------|---------|---------|---------|---------|---------|---------|---------|---------|---------|---------|---------|
| GOF1-Max          | 7.3e-01 | 3.0e-02 | 5.1e-01 | 6.7e-01 | 1.4e-01 | 2.0e-01 | 3.6e-05 | 7.2e-01 | 8.8e-01 | 5.6e-02 | 7.4e-04 | 4.6e-02 |
| GOF2-Max          | 7.2e-01 | 3.6e-02 | 5.4e-01 | 6.6e-01 | 1.7e-01 | 1.7e-01 | 1.8e-04 | 7.1e-01 | 8.7e-01 | 5.5e-02 | 1.4e-03 | 3.8e-02 |
| GOF1              | 7.3e-01 | 3.0e-02 | 5.1e-01 | 6.7e-01 | 1.4e-01 | 2.0e-01 | 3.6e-05 | 8.4e-01 | 1.7e-01 | 5.6e-02 | 1.3e-02 | 6.9e-03 |
| GOF2              | 7.2e-01 | 3.6e-02 | 5.4e-01 | 6.6e-01 | 1.7e-01 | 1.7e-01 | 1.8e-04 | 8.5e-01 | 2.0e-01 | 5.5e-02 | 1.1e-02 | 2.4e-03 |

Table S10: Goodness-of-fit tests for T2D: the cells with the p-values less than the Bonferroni adjusted significance cutoff 0.001 are marked with red.

| Method \ Exposure | HDL     | LDL     | TG      | Alcohol | Smoke   | BF      | BW      | BMI     | Height  | FG      | SBP     | DBP     |
|-------------------|---------|---------|---------|---------|---------|---------|---------|---------|---------|---------|---------|---------|
| GOF1-Max          | 5.2e-02 | 7.4e-02 | 3.5e-02 | 5.1e-01 | 1.5e-01 | 2.5e-01 | 9.8e-07 | 1.6e-02 | 7.2e-02 | 4.0e-12 | 3.7e-02 | 1.2e-01 |
| GOF2-Max          | 5.6e-02 | 1.1e-01 | 1.5e-02 | 5.2e-01 | 1.7e-01 | 8.8e-02 | 2.4e-08 | 3.3e-02 | 8.4e-02 | 2.2e-16 | 5.5e-02 | 9.4e-02 |
| GOF1              | 5.2e-02 | 7.4e-02 | 3.5e-02 | 5.1e-01 | 1.5e-01 | 2.5e-01 | 9.8e-07 | 1.6e-02 | 2.3e-01 | 4.0e-12 | 2.6e-02 | 4.6e-03 |
| GOF2              | 5.6e-02 | 1.1e-01 | 1.5e-02 | 5.2e-01 | 1.7e-01 | 8.8e-02 | 2.4e-08 | 3.3e-02 | 2.3e-01 | 2.2e-16 | 2.2e-02 | 1.0e-02 |

Table S11: GWAS data used for 13 traits in secondary real data analysis.

| Trait Name | ID in TwoSampleMR | Sample Size | Ref. |
|------------|-------------------|-------------|------|
| FP         | ebi-a-GCST001212  | 10,701      | [9]  |
| Height     | ieu-a-89          | 253,288     | [12] |
| HOMA       | ebi-a-GCST005180  | 36,466      | [3]  |
| LDL        | ebi-a-GCST002222  | 94,595      | [11] |
| RA         | ebi-a-GCST002318  | 58,284      | [7]  |
| SCZ        | ieu-b-42          | 77,096      | [8]  |
| T2D        | ieu-a-26          | 69,033      | [5]  |
| ASmk       | ieu-a-964         | 47,961      | [4]  |
| ANRX       | ieu-a-45          | 17,767      | [2]  |
| CIQ        | ieu-a-16          | 12,441      | [1]  |
| ESmk       | ieu-a-962         | 74,035      | [4]  |
| FSmk       | ieu-a-963         | 41,969      | [4]  |
| IHC        | ieu-a-28          | 10,768      | [10] |

Table S12: Secondary real data analysis, set 1.

| Method \ Exp/Out   | FP/ASmk (6)                | FP/ANRX (6)                | FP/CIQ (4)                 | FP/ESmk (6)                | FP/FSmk (6)                | FP/Height (6)              | FP/HOMA (6)                | FP/IHC (6)                 | FP/LDL (5)                 |
|--------------------|----------------------------|----------------------------|----------------------------|----------------------------|----------------------------|----------------------------|----------------------------|----------------------------|----------------------------|
| cML-MA-BIC-Max     | 2.3e-01, -1.9e-02, 1.6e-02 | 6.1e-01, 9.0e-02, 1.8e-01  | 1.9e-01, -1.3e-01, 1.0e-01 | 6.7e-01, -3.5e-02, 8.3e-02 | 1.1e-01, -1.8e-01, 1.1e-01 | 4.3e-02, 4.8e-02, 2.4e-02  | 3.7e-08, -2.5e-01, 4.6e-02 | 4.5e-01, -7.3e-02, 9.6e-02 | 2.0e-01, 4.5e-02, 3.5e-02  |
| cML-BIC-Max        | 2.3e-01, -1.9e-02, 1.6e-02 | 6.0e-01, 9.3e-02, 1.8e-01  | 1.9e-01, -1.3e-01, 1.0e-01 | 5.7e-01, -4.5e-02, 7.8e-02 | 1.1e-01, -1.8e-01, 1.1e-01 | 5.1e-02, 4.0e-02, 2.1e-02  | 5.4e-11, -2.8e-01, 4.2e-02 | 4.4e-01, -7.4e-02, 9.6e-02 | 3.5e-01, 2.6e-02, 2.7e-02  |
| cML-MA-BIC         | 2.3e-01, -1.9e-02, 1.6e-02 | 6.2e-01, 8.9e-02, 1.8e-01  | 1.9e-01, -1.3e-01, 1.0e-01 | 7.9e-01, -2.3e-02, 8.8e-02 | 1.1e-01, -1.8e-01, 1.1e-01 | 5.2e-02, 4.2e-02, 2.2e-02  | 1.1e-08, -2.6e-01, 4.6e-02 | 4.5e-01, -7.3e-02, 9.6e-02 | 1.3e-01, 6.2e-02, 4.1e-02  |
| cML-BIC            | 2.3e-01, -1.9e-02, 1.6e-02 | 6.0e-01, 9.3e-02, 1.8e-01  | 1.9e-01, -1.3e-01, 1.0e-01 | 5.7e-01, -4.5e-02, 7.8e-02 | 1.1e-01, -1.8e-01, 1.1e-01 | 5.1e-02, 4.0e-02, 2.1e-02  | 5.4e-11, -2.8e-01, 4.2e-02 | 4.4e-01, -7.4e-02, 9.6e-02 | 3.5e-01, 2.6e-02, 2.7e-02  |
| cML-MA-BIC-DP-Max  | 2.5e-01, -2.0e-02, 1.7e-02 | 6.9e-01, 7.6e-02, 1.9e-01  | 2.2e-01, -1.3e-01, 1.0e-01 | 7.8e-01, -2.8e-02, 1.0e-01 | 1.2e-01, -1.8e-01, 1.2e-01 | 7.8e-02, 4.5e-02, 2.6e-02  | 4.5e-01, -1.3e-01, 1.7e-01 | 4.5e-01, -7.8e-02, 1.0e-01 | 2.9e-01, 4.9e-02, 4.7e-02  |
| cML-BIC-DP-Max     | 2.4e-01, -2.0e-02, 1.7e-02 | 6.8e-01, 7.5e-02, 1.8e-01  | 2.2e-01, -1.3e-01, 1.0e-01 | 5.5e-01, -5.0e-02, 8.3e-02 | 1.1e-01, -1.8e-01, 1.2e-01 | 8.5e-02, 4.3e-02, 2.5e-02  | 3.7e-01, -1.4e-01, 1.5e-01 | 4.4e-01, -7.9e-02, 1.0e-01 | 2.4e-01, 5.0e-02, 4.2e-02  |
| cML-MA-BIC-DP      | 2.6e-01, -2.0e-02, 1.8e-02 | 6.9e-01, 7.6e-02, 1.9e-01  | 2.2e-01, -1.3e-01, 1.0e-01 | 9.1e-01, -1.3e-02, 1.1e-01 | 1.3e-01, -1.8e-01, 1.2e-01 | 9.0e-02, 4.3e-02, 2.5e-02  | 4.8e-01, -1.2e-01, 1.7e-01 | 4.5e-01, -7.8e-02, 1.0e-01 | 2.8e-01, 6.0e-02, 5.6e-02  |
| cML-BIC-DP         | 2.4e-01, -2.0e-02, 1.7e-02 | 6.8e-01, 7.5e-02, 1.8e-01  | 2.2e-01, -1.3e-01, 1.0e-01 | 9.2e-01, 1.2e-02, 1.2e-01  | 1.1e-01, -1.8e-01, 1.2e-01 | 8.5e-02, 4.3e-02, 2.5e-02  | 5.5e-01, -1.1e-01, 1.9e-01 | 4.4e-01, -7.9e-02, 1.0e-01 | 2.4e-01, 5.0e-02, 4.2e-02  |
| MR-Mix             | 2.0e-01, -3.0e-02, 2.3e-02 | 8.0e-01, 1.0e-02, 3.8e-02  | 1.7e-01, -7.0e-02, 5.1e-02 | 7.8e-01, 1.0e-02, 3.7e-02  | 1.1e-01, -4.0e-02, 2.5e-02 | 6.8e-02, 2.0e-02, 1.1e-02  | 1.0e-09, -3.2e-01, 5.2e-02 | 4.7e-01, -3.5e-02, 4.9e-02 | 2.5e-04, 3.5e-02, 2.7e-02  |
| MR-ContMix         | 2.5e-01, -1.7e-02, NA      | 6.1e-01, 9.5e-02, NA       | 2.4e-01, -1.3e-01, NA      | 5.6e-01, 5.0e-02, NA       | 1.7e-01, -2.1e-01, NA      | 1.1e-01, 3.8e-02, NA       | 1.4e-02, -2.7e-01, NA      | 1.4e-01, -7.7e-02, NA      | 2.3e-01, 1.4e-01, NA       |
| MR-Lasso           | 3.7e-01, -1.5e-02, 1.7e-02 | 8.0e-01, -5.3e-02, 2.1e-01 | 1.9e-01, -1.3e-01, 9.9e-02 | 6.7e-01, -4.4e-02, 1.0e-01 | 1.1e-01, -1.8e-01, 1.1e-01 | 5.0e-02, 4.0e-02, 2.1e-02  | 5.8e-02, -1.5e-01, 8.1e-02 | 4.4e-01, -7.4e-02, 9.6e-02 | 6.8e-01, 2.4e-02, 5.9e-02  |
| MR-PRESSO          | 1.3e-01, -1.9e-02, 1.1e-02 | 5.5e-01, 9.2e-02, 1.4e-01  | 1.5e-01, -1.3e-01, 6.7e-02 | 6.9e-01, -4.4e-02, 1.0e-01 | 9.7e-02, -1.8e-01, 8.7e-02 | 8.0e-02, 4.0e-02, 1.7e-02  | 5.0e-02, 5.6e-02, 4.4e-03  | 1.7e-01, -7.4e-02, 4.6e-02 | 3.1e-01, 5.8e-02, 4.7e-02  |
| MR-IVW             | 2.3e-01, -1.9e-02, 1.6e-02 | 6.1e-01, 9.2e-02, 1.8e-01  | 1.9e-01, -1.3e-01, 9.9e-02 | 6.7e-01, -4.4e-02, 1.0e-01 | 1.1e-01, -1.8e-01, 1.1e-01 | 7.6e-02, 6.5e-02, 3.6e-02  | 7.1e-01, -3.1e-02, 8.2e-02 | 4.4e-01, -7.4e-02, 9.6e-02 | 6.8e-01, 2.4e-02, 5.9e-02  |
| MR-Egger           | 4.6e-01, -2.8e-02, 3.8e-02 | 8.9e-01, 5.5e-02, 3.9e-01  | 9.1e-01, -2.8e-02, 2.4e-01 | 1.9e-01, -2.9e-01, 2.2e-01 | 9.0e-01, 3.2e-02, 2.5e-01  | 7.0e-01, -3.0e-02, 7.8e-02 | 1.7e-01, 2.1e-01, 1.6e-01  | 9.6e-01, 1.2e-02, 2.2e-01  | 9.5e-01, -1.1e-02, 1.7e-01 |
| MR-Weighted-Median | 6.2e-01, -9.5e-03, 1.9e-02 | 9.4e-01, 1.7e-02, 2.2e-01  | 3.5e-01, -1.1e-01, 1.2e-01 | 9.6e-01, 5.4e-03, 1.0e-01  | 3.0e-01, -1.4e-01, 1.3e-01 | 1.2e-01, 3.8e-02, 2.5e-02  | 6.9e-02, 6.8e-02, 3.8e-02  | 6.2e-01, -5.5e-02, 1.1e-01 | 4.1e-01, 2.8e-02, 3.4e-02  |
| MR-Weighted-Mode   | 1.6e-01, -3.3e-02, 2.4e-02 | 6.0e-01, -1.7e-01, 3.2e-01 | 6.0e-01, -6.9e-02, 1.3e-01 | 8.9e-01, 1.7e-02, 1.2e-01  | 4.2e-01, -1.2e-01, 1.6e-01 | 1.9e-01, 3.6e-02, 2.7e-02  | 1.7e-03, 9.8e-02, 3.1e-02  | 6.7e-01, -5.6e-02, 1.3e-01 | 5.1e-01, 2.4e-02, 3.7e-02  |
| MR-RAPS1           | 2.3e-01, -1.9e-02, 1.6e-02 | 6.1e-01, 9.3e-02, 1.8e-01  | 1.9e-01, -1.3e-01, 1.0e-01 | 5.7e-01, -4.5e-02, 8.0e-02 | 1.1e-01, -1.8e-01, 1.1e-01 | 1.0e-01, 5.1e-02, 3.1e-02  | 9.1e-01, 7.4e-03, 6.5e-02  | 4.4e-01, -7.4e-02, 9.6e-02 | 5.8e-01, 2.8e-02, 5.0e-02  |
| MR-RAPS2           | 2.5e-01, -1.9e-02, 1.6e-02 | 6.4e-01, 8.7e-02, 1.8e-01  | 2.1e-01, -1.3e-01, 1.0e-01 | 9.5e-01, -4.9e-03, 8.1e-02 | 1.2e-01, -1.8e-01, 1.1e-01 | 1.3e-01, 4.6e-02, 3.0e-02  | 8.5e-01, 1.3e-02, 7.2e-02  | 4.7e-01, -7.1e-02, 9.9e-02 | 6.0e-01, 2.9e-02, 5.5e-02  |
| MR-RAPS3           | 2.3e-01, -1.9e-02, 1.6e-02 | 6.1e-01, 9.3e-02, 1.8e-01  | 1.9e-01, -1.3e-01, 1.0e-01 | 5.7e-01, -4.5e-02, 8.0e-02 | 1.1e-01, -1.8e-01, 1.1e-01 | 1.0e-03, 6.7e-02, 2.1e-02  | 1.5e-01, -3.7e-02, 2.6e-02 | 4.4e-01, -7.4e-02, 9.6e-02 | 3.6e-01, 2.6e-02, 2.8e-02  |
| MR-RAPS4           | 2.5e-01, -1.9e-02, 1.6e-02 | 6.4e-01, 8.7e-02, 1.8e-01  | 2.1e-01, -1.3e-01, 1.0e-01 | 9.5e-01, -4.9e-03, 8.1e-02 | 1.2e-01, -1.8e-01, 1.1e-01 | 3.8e-02, 4.2e-02, 2.0e-02  | 3.0e-03, -6.9e-02, 2.3e-02 | 4.7e-01, -7.1e-02, 9.9e-02 | 1.0e-01, 4.7e-02, 2.8e-02  |



Table S13: Secondary real data analysis, set 2.

| Method \ Exp/Out   | FP/RA (6)                  | FP/SCZ (6)                 | FP/T2D (6)                 | Height/ASmk (310)          | Height/ESmk (310)          | Height/FP (307)            | Height/FSmk (310)          | Height/HOMA (303)          | Height/RA (306)           |
|--------------------|----------------------------|----------------------------|----------------------------|----------------------------|----------------------------|----------------------------|----------------------------|----------------------------|---------------------------|
| cML-MA-BIC-Max     | 5.6e-01, -6.8e-02, 1.2e-01 | 8.3e-02, -1.2e-01, 6.7e-02 | 2.2e-01, -4.9e-01, 4.0e-01 | 5.7e-01, 3.0e-03, 5.2e-03  | 1.4e-01, -4.0e-02, 2.7e-02 | 3.7e-01, 1.4e-02, 1.6e-02  | 7.4e-01, -1.2e-02, 3.6e-02 | 2.6e-01, -8.3e-03, 7.4e-03 | 1.3e-02, 8.1e-02, 3.3e-02 |
| cML-BIC-Max        | 2.7e-01, -1.1e-01, 9.9e-02 | 8.6e-02, -1.1e-01, 6.6e-02 | 3.3e-05, -6.8e-01, 1.6e-01 | 6.5e-01, 2.3e-03, 5.0e-03  | 1.2e-01, -4.1e-02, 2.6e-02 | 3.4e-01, 1.5e-02, 1.6e-02  | 8.5e-01, -6.9e-03, 3.6e-02 | 2.4e-01, -8.6e-03, 7.3e-03 | 1.3e-02, 8.1e-02, 3.2e-02 |
| cML-MA-BIC         | 7.7e-01, -3.7e-02, 1.2e-01 | 8.0e-02, -1.2e-01, 6.8e-02 | 6.9e-01, -2.8e-01, 7.0e-01 | 5.0e-01, 3.6e-03, 5.3e-03  | 1.2e-01, -4.1e-02, 2.7e-02 | 4.7e-01, 1.1e-02, 1.6e-02  | 6.4e-01, -1.7e-02, 3.6e-02 | 2.8e-01, -8.1e-03, 7.4e-03 | 1.1e-02, 8.6e-02, 3.4e-02 |
| cML-BIC            | 2.7e-01, -1.1e-01, 9.9e-02 | 8.6e-02, -1.1e-01, 6.6e-02 | 3.3e-05, -6.8e-01, 1.6e-01 | 6.5e-01, 2.3e-03, 5.0e-03  | 1.2e-01, -4.1e-02, 2.6e-02 | 4.9e-01, 1.1e-02, 1.6e-02  | 5.9e-01, -1.9e-02, 3.6e-02 | 3.1e-01, -7.5e-03, 7.4e-03 | 8.6e-03, 8.5e-02, 3.2e-02 |
| cML-MA-BIC-DP-Max  | 6.3e-01, -7.5e-02, 1.6e-01 | 9.1e-02, -1.2e-01, 7.3e-02 | 8.2e-01, -2.8e-01, 9.6e-01 | 6.0e-01, 3.0e-03, 5.8e-03  | 1.9e-01, -3.9e-02, 3.0e-02 | 4.0e-01, 1.4e-02, 1.6e-02  | 7.1e-01, -1.5e-02, 3.9e-02 | 4.6e-01, -6.6e-03, 9.0e-03 | 2.8e-02, 9.7e-02, 4.4e-02 |
| cML-BIC-DP-Max     | 8.3e-01, -3.7e-02, 1.8e-01 | 7.7e-02, -1.2e-01, 6.8e-02 | 8.2e-01, 2.1e-01, 9.1e-01  | 6.8e-01, 2.3e-03, 5.5e-03  | 1.5e-01, -4.3e-02, 2.9e-02 | 3.8e-01, 1.4e-02, 1.5e-02  | 6.1e-01, -2.0e-02, 3.8e-02 | 5.6e-01, -5.2e-03, 9.0e-03 | 2.1e-02, 9.7e-02, 4.2e-02 |
| cML-MA-BIC-DP      | 7.5e-01, -5.6e-02, 1.8e-01 | 1.1e-01, -1.3e-01, 7.9e-02 | 8.2e-01, 2.3e-01, 1.0e+00  | 5.6e-01, 3.5e-03, 6.0e-03  | 2.3e-01, -3.7e-02, 3.1e-02 | 5.4e-01, 1.2e-02, 1.9e-02  | 8.2e-01, -9.9e-03, 4.3e-02 | 5.4e-01, -5.5e-03, 9.1e-03 | 3.1e-02, 1.0e-01, 4.7e-02 |
| cML-BIC-DP         | 8.3e-01, -3.7e-02, 1.8e-01 | 7.7e-02, -1.2e-01, 6.8e-02 | 8.2e-01, 2.1e-01, 9.1e-01  | 5.3e-01, 3.7e-03, 6.0e-03  | 2.1e-01, -3.8e-02, 3.0e-02 | 5.9e-01, 1.1e-02, 2.0e-02  | 8.3e-01, -9.7e-03, 4.5e-02 | 5.6e-01, -5.2e-03, 9.0e-03 | 4.8e-02, 9.8e-02, 5.0e-02 |
| MR-Mix             | 3.3e-01, 4.0e-02, 4.1e-02  | 6.6e-01, -7.0e-02, 1.6e-01 | 3.4e-02, -1.3e-01, 6.1e-02 | 8.0e-01, 5.0e-02, 2.0e-01  | 1.1e-01, -4.0e-02, 2.5e-02 | 8.5e-01, -8.0e-02, 4.3e-01 | 3.1e-01, -3.0e-02, 3.0e-02 | 6.4e-01, -3.0e-02, 1.3e-01 | 2.6e-01, 3.0e-02, 2.7e-02 |
| MR-ContMix         | 2.1e-01, 1.8e-01, NA       | 3.4e-02, -1.5e-01, NA      | 4.0e-02, -9.1e-01, NA      | 6.1e-01, 2.2e-03, NA       | 8.4e-01, 9.3e-03, NA       | 2.9e-01, 2.8e-02, NA       | 8.5e-01, 1.3e-02, NA       | 8.2e-01, -7.9e-03, NA      | 2.7e-03, 2.0e-01, NA      |
| MR-Lasso           | 5.6e-01, -1.0e-01, 1.8e-01 | 1.8e-01, -1.1e-01, 8.4e-02 | 2.1e-01, 7.6e-01, 6.0e-01  | 3.3e-01, 5.0e-03, 5.1e-03  | 9.3e-02, -4.4e-02, 2.6e-02 | 4.9e-01, 1.1e-02, 1.6e-02  | 6.0e-01, -1.9e-02, 3.6e-02 | 4.7e-01, -5.4e-03, 7.5e-03 | 1.6e-05, 1.5e-01, 3.4e-02 |
| MR-PRESSO          | 8.8e-01, 2.4e-02, 1.5e-01  | 2.4e-01, -1.1e-01, 8.4e-02 | 4.2e-01, 6.5e-01, 5.1e-01  | 6.6e-01, 2.2e-03, 5.0e-03  | 3.0e-01, -2.8e-02, 2.7e-02 | 3.6e-01, 1.5e-02, 1.6e-02  | 6.1e-01, -1.9e-02, 3.7e-02 | 3.1e-01, -8.4e-03, 8.3e-03 | 3.1e-02, 8.6e-02, 4.0e-02 |
| MR-IVW             | 5.6e-01, -1.0e-01, 1.8e-01 | 1.8e-01, -1.1e-01, 8.4e-02 | 4.2e-01, 7.7e-01, 9.6e-01  | 6.6e-01, 2.2e-03, 5.0e-03  | 3.0e-01, -2.8e-02, 2.7e-02 | 3.6e-01, 1.5e-02, 1.6e-02  | 8.6e-01, -6.8e-03, 3.8e-02 | 3.1e-01, -8.4e-03, 8.3e-03 | 1.9e-02, 1.1e-01, 4.7e-02 |
| MR-Egger           | 5.7e-01, 2.3e-01, 4.0e-01  | 4.0e-01, -1.7e-01, 2.0e-01 | 6.8e-01, -9.3e-01, 2.2e+00 | 6.5e-01, 6.1e-03, 1.3e-02  | 9.1e-01, -7.7e-03, 7.2e-02 | 9.3e-01, -3.7e-03, 4.3e-02 | 4.3e-01, -8.1e-02, 1.0e-01 | 2.8e-01, -2.4e-02, 2.3e-02 | 1.7e-01, 1.6e-01, 1.2e-01 |
| MR-Weighted-Median | 3.9e-01, 1.2e-01, 1.4e-01  | 3.2e-02, -1.8e-01, 8.3e-02 | 5.9e-03, -7.5e-01, 2.7e-01 | 1.0e+00, 0.0e+00, 8.1e-03  | 6.9e-01, -1.7e-02, 4.1e-02 | 4.3e-01, 1.9e-02, 2.4e-02  | 1.0e+00, 9.2e-05, 5.8e-02  | 5.7e-01, -6.6e-03, 1.2e-02 | 4.8e-01, 4.0e-02, 5.7e-02 |
| MR-Weighted-Mode   | 4.1e-01, 1.2e-01, 1.5e-01  | 1.1e-01, -1.6e-01, 1.0e-01 | 1.6e-02, -4.3e-01, 1.8e-01 | 6.1e-01, -1.2e-02, 2.3e-02 | 9.7e-01, -3.1e-03, 7.8e-02 | 8.0e-01, 1.3e-02, 5.3e-02  | 6.9e-01, 4.8e-02, 1.2e-01  | 5.5e-01, 1.5e-02, 2.6e-02  | 6.7e-02, 1.8e-01, 9.6e-02 |
| MR-RAPS1           | 8.1e-01, -3.6e-02, 1.5e-01 | 1.4e-01, -1.1e-01, 7.7e-02 | 5.6e-01, 4.1e-01, 7.0e-01  | 6.5e-01, 2.3e-03, 5.2e-03  | 3.0e-01, -2.9e-02, 2.8e-02 | 3.6e-01, 1.5e-02, 1.6e-02  | 8.6e-01, -6.8e-03, 3.8e-02 | 2.9e-01, -8.7e-03, 8.2e-03 | 1.3e-02, 1.2e-01, 4.8e-02 |
| MR-RAPS2           | 9.4e-01, -1.2e-02, 1.6e-01 | 1.3e-01, -1.2e-01, 8.1e-02 | 6.9e-01, 2.9e-01, 7.1e-01  | 4.6e-01, 3.9e-03, 5.3e-03  | 2.0e-01, -3.6e-02, 2.8e-02 | 4.3e-01, 1.3e-02, 1.6e-02  | 8.1e-01, -9.1e-03, 3.8e-02 | 4.4e-01, -6.4e-03, 8.3e-03 | 3.1e-02, 9.4e-02, 4.4e-02 |
| MR-RAPS3           | 2.7e-01, -1.1e-01, 1.0e-01 | 9.1e-02, -1.1e-01, 6.7e-02 | 6.8e-10, 2.1e+00, 3.4e-01  | 6.5e-01, 2.3e-03, 5.1e-03  | 2.8e-01, -2.8e-02, 2.6e-02 | 3.5e-01, 1.5e-02, 1.6e-02  | 8.5e-01, -6.9e-03, 3.6e-02 | 2.5e-01, -8.6e-03, 7.4e-03 | 5.1e-04, 1.1e-01, 3.2e-02 |
| MR-RAPS4           | 9.6e-01, -5.1e-03, 1.0e-01 | 6.0e-02, -1.3e-01, 6.9e-02 | 3.8e-02, 2.6e-01, 1.3e-01  | 4.4e-01, 4.0e-03, 5.2e-03  | 1.9e-01, -3.6e-02, 2.7e-02 | 4.3e-01, 1.3e-02, 1.6e-02  | 7.9e-01, -9.6e-03, 3.7e-02 | 4.2e-01, -6.1e-03, 7.6e-03 | 9.2e-04, 1.1e-01, 3.3e-02 |

Table S14: Secondary real data analysis, set 3.

| Method \ Exp/Out   | Height/SCZ (288)                 | Height/T2D (307)                 | HOMA/ASmk (2)                    | HOMA/ESmk (2)                   | HOMA/FP (2)                     | HOMA/FSmk (2)                   | HOMA/Height (2)                  | HOMA/IHC (2)                    | HOMA/LDL (2)                     |
|--------------------|----------------------------------|----------------------------------|----------------------------------|---------------------------------|---------------------------------|---------------------------------|----------------------------------|---------------------------------|----------------------------------|
| cML-MA-BIC-Max     | 1.3e-01,<br>-3.8e-02,<br>2.5e-02 | 7.8e-01,<br>-1.1e-02,<br>4.0e-02 | 3.3e-01,<br>-5.3e-02,<br>5.5e-02 | 6.8e-01,<br>1.2e-01,<br>2.8e-01 | 1.6e-01,<br>2.4e-01,<br>1.7e-01 | 2.3e-02,<br>8.8e-01,<br>3.9e-01 | 3.3e-02,<br>-1.6e-01,<br>7.3e-02 | 1.8e-01,<br>4.6e-01,<br>3.4e-01 | 7.7e-01,<br>-2.8e-02,<br>9.5e-02 |
| cML-BIC-Max        | 1.1e-01,<br>-3.9e-02,<br>2.5e-02 | 9.7e-01,<br>-1.7e-03,<br>4.0e-02 | 3.3e-01,<br>-5.3e-02,<br>5.5e-02 | 6.8e-01,<br>1.2e-01,<br>2.8e-01 | 1.6e-01,<br>2.4e-01,<br>1.7e-01 | 2.3e-02,<br>8.8e-01,<br>3.9e-01 | 3.3e-02,<br>-1.6e-01,<br>7.3e-02 | 1.8e-01,<br>4.6e-01,<br>3.4e-01 | 7.7e-01,<br>-2.8e-02,<br>9.5e-02 |
| cML-MA-BIC         | 1.4e-01,<br>-3.7e-02,<br>2.5e-02 | 7.4e-01,<br>-1.4e-02,<br>4.1e-02 | 3.3e-01,<br>-5.3e-02,<br>5.5e-02 | 6.8e-01,<br>1.2e-01,<br>2.8e-01 | 1.6e-01,<br>2.4e-01,<br>1.7e-01 | 2.3e-02,<br>8.8e-01,<br>3.9e-01 | 3.3e-02,<br>-1.6e-01,<br>7.3e-02 | 1.8e-01,<br>4.6e-01,<br>3.4e-01 | 7.7e-01,<br>-2.8e-02,<br>9.5e-02 |
| cML-BIC            | 9.3e-02,<br>-4.1e-02,<br>2.5e-02 | 5.8e-01,<br>-2.2e-02,<br>4.0e-02 | 3.3e-01,<br>-5.3e-02,<br>5.5e-02 | 6.8e-01,<br>1.2e-01,<br>2.8e-01 | 1.6e-01,<br>2.4e-01,<br>1.7e-01 | 2.3e-02,<br>8.8e-01,<br>3.9e-01 | 3.3e-02,<br>-1.6e-01,<br>7.3e-02 | 1.8e-01,<br>4.6e-01,<br>3.4e-01 | 7.7e-01,<br>-2.8e-02,<br>9.5e-02 |
| cML-MA-BIC-DP-Max  | 3.9e-01,<br>-3.3e-02,<br>3.8e-02 | 9.2e-01,<br>5.0e-03,<br>5.0e-02  | 4.3e-01,<br>-5.0e-02,<br>6.4e-02 | 6.8e-01,<br>1.3e-01,<br>3.2e-01 | 2.1e-01,<br>2.5e-01,<br>2.0e-01 | 4.8e-02,<br>9.1e-01,<br>4.6e-01 | 7.1e-02,<br>-1.5e-01,<br>8.5e-02 | 2.3e-01,<br>4.8e-01,<br>4.1e-01 | 8.3e-01,<br>-2.5e-02,<br>1.1e-01 |
| cML-BIC-DP-Max     | 4.3e-01,<br>-3.1e-02,<br>3.9e-02 | 9.2e-01,<br>5.1e-03,<br>4.9e-02  | 4.3e-01,<br>-5.0e-02,<br>6.4e-02 | 6.8e-01,<br>1.3e-01,<br>3.2e-01 | 2.1e-01,<br>2.5e-01,<br>2.0e-01 | 4.8e-02,<br>9.1e-01,<br>4.6e-01 | 7.1e-02,<br>-1.5e-01,<br>8.5e-02 | 2.3e-01,<br>4.8e-01,<br>4.1e-01 | 8.3e-01,<br>-2.5e-02,<br>1.1e-01 |
| cML-MA-BIC-DP      | 3.7e-01,<br>-3.7e-02,<br>4.1e-02 | 9.3e-01,<br>4.7e-03,<br>5.3e-02  | 4.3e-01,<br>-5.0e-02,<br>6.4e-02 | 6.8e-01,<br>1.3e-01,<br>3.2e-01 | 2.1e-01,<br>2.5e-01,<br>2.0e-01 | 4.8e-02,<br>9.1e-01,<br>4.6e-01 | 7.1e-02,<br>-1.5e-01,<br>8.5e-02 | 2.3e-01,<br>4.8e-01,<br>4.1e-01 | 8.3e-01,<br>-2.5e-02,<br>1.1e-01 |
| cML-BIC-DP         | 3.2e-01,<br>-4.2e-02,<br>4.2e-02 | 9.2e-01,<br>5.1e-03,<br>4.9e-02  | 4.3e-01,<br>-5.0e-02,<br>6.4e-02 | 6.8e-01,<br>1.3e-01,<br>3.2e-01 | 2.1e-01,<br>2.5e-01,<br>2.0e-01 | 4.8e-02,<br>9.1e-01,<br>4.6e-01 | 7.1e-02,<br>-1.5e-01,<br>8.5e-02 | 2.3e-01,<br>4.8e-01,<br>4.1e-01 | 8.3e-01,<br>-2.5e-02,<br>1.1e-01 |
| MR-Mix             | 7.1e-01,<br>-7.0e-02,<br>1.9e-01 | 7.0e-01,<br>4.0e-02,<br>1.1e-01  | NA                               | NA                              | NA                              | NA                              | NA                               | NA                              | NA                               |
| MR-ContMix         | 2.8e-02,<br>-1.0e-01,<br>NA      | 6.7e-01,<br>3.4e-02,<br>NA       | NA                               | NA                              | NA                              | NA                              | NA                               | NA                              | NA                               |
| MR-Lasso           | 3.7e-02,<br>-5.6e-02,<br>2.7e-02 | 9.3e-01,<br>4.0e-03,<br>4.3e-02  | NA                               | NA                              | NA                              | NA                              | NA                               | NA                              | NA                               |
| MR-PRESSO          | 4.5e-01,<br>-2.5e-02,<br>3.3e-02 | 7.6e-01,<br>-1.5e-02,<br>4.9e-02 | NA                               | NA                              | NA                              | NA                              | NA                               | NA                              | NA                               |
| MR-IVW             | 4.3e-01,<br>-3.0e-02,<br>3.7e-02 | 1.0e+00,<br>8.5e-05,<br>5.1e-02  | NA                               | NA                              | NA                              | NA                              | NA                               | NA                              | NA                               |
| MR-Egger           | 9.2e-01,<br>9.6e-03,<br>1.0e-01  | 3.1e-01,<br>1.4e-01,<br>1.4e-01  | NA                               | NA                              | NA                              | NA                              | NA                               | NA                              | NA                               |
| MR-Weighted-Median | 4.1e-01,<br>-3.5e-02,<br>4.3e-02 | 1.0e+00,<br>0.0e+00,<br>6.5e-02  | NA                               | NA                              | NA                              | NA                              | NA                               | NA                              | NA                               |
| MR-Weighted-Mode   | 9.8e-01,<br>2.6e-03,<br>1.0e-01  | 9.8e-01,<br>3.9e-03,<br>1.9e-01  | NA                               | NA                              | NA                              | NA                              | NA                               | NA                              | NA                               |
| MR-RAPS1           | 3.5e-01,<br>-3.5e-02,<br>3.7e-02 | 9.9e-01,<br>-7.7e-04,<br>5.2e-02 | NA                               | NA                              | NA                              | NA                              | NA                               | NA                              | NA                               |
| MR-RAPS2           | 3.3e-01,<br>-3.6e-02,<br>3.7e-02 | 8.8e-01,<br>8.1e-03,<br>5.2e-02  | NA                               | NA                              | NA                              | NA                              | NA                               | NA                              | NA                               |
| MR-RAPS3           | 2.1e-01,<br>-3.0e-02,<br>2.4e-02 | 1.0e+00,<br>8.7e-05,<br>4.0e-02  | NA                               | NA                              | NA                              | NA                              | NA                               | NA                              | NA                               |
| MR-RAPS4           | 1.5e-01,<br>-3.6e-02,<br>2.5e-02 | 8.4e-01,<br>8.2e-03,<br>4.1e-02  | NA                               | NA                              | NA                              | NA                              | NA                               | NA                              | NA                               |

Table S15: Secondary real data analysis, set 4.

| Method \ Exp/Out   | HOMA/RA (2)                     | HOMA/SCZ (2)                    | HOMA/T2D (2)                    | LDL/ASmk (69)                    | LDL/ANRX (52)                   | LDL/ESmk (69)                    | LDL/FP (68)                      | LDL/FSmk (69)                   | LDL/HOMA (68)                    |
|--------------------|---------------------------------|---------------------------------|---------------------------------|----------------------------------|---------------------------------|----------------------------------|----------------------------------|---------------------------------|----------------------------------|
| cML-MA-BIC-Max     | 3.8e-01,<br>3.4e-01,<br>3.9e-01 | 2.9e-01,<br>2.7e-01,<br>2.6e-01 | 3.8e-01,<br>3.5e-01,<br>4.0e-01 | 1.9e-01,<br>-8.4e-03,<br>6.5e-03 | 5.3e-02,<br>1.6e-01,<br>8.1e-02 | 4.1e-01,<br>-2.8e-02,<br>3.4e-02 | 1.1e-02,<br>-5.3e-02,<br>2.1e-02 | 1.6e-01,<br>6.5e-02,<br>4.6e-02 | 8.1e-01,<br>2.3e-03,<br>9.4e-03  |
| cML-BIC-Max        | 3.8e-01,<br>3.4e-01,<br>3.9e-01 | 2.9e-01,<br>2.7e-01,<br>2.6e-01 | 3.8e-01,<br>3.5e-01,<br>4.0e-01 | 1.9e-01,<br>-8.5e-03,<br>6.4e-03 | 5.2e-02,<br>1.6e-01,<br>8.1e-02 | 3.0e-01,<br>-3.4e-02,<br>3.3e-02 | 1.1e-02,<br>-5.3e-02,<br>2.1e-02 | 1.8e-01,<br>6.1e-02,<br>4.6e-02 | 8.2e-01,<br>2.0e-03,<br>9.2e-03  |
| cML-MA-BIC         | 3.8e-01,<br>3.4e-01,<br>3.9e-01 | 2.9e-01,<br>2.7e-01,<br>2.6e-01 | 3.8e-01,<br>3.5e-01,<br>4.0e-01 | 1.9e-01,<br>-8.4e-03,<br>6.5e-03 | 5.5e-02,<br>1.6e-01,<br>8.1e-02 | 4.2e-01,<br>-2.7e-02,<br>3.4e-02 | 1.2e-02,<br>-5.3e-02,<br>2.1e-02 | 1.5e-01,<br>6.6e-02,<br>4.6e-02 | 7.6e-01,<br>2.9e-03,<br>9.4e-03  |
| cML-BIC            | 3.8e-01,<br>3.4e-01,<br>3.9e-01 | 2.9e-01,<br>2.7e-01,<br>2.6e-01 | 3.8e-01,<br>3.5e-01,<br>4.0e-01 | 1.9e-01,<br>-8.5e-03,<br>6.4e-03 | 5.2e-02,<br>1.6e-01,<br>8.1e-02 | 4.8e-01,<br>-2.4e-02,<br>3.3e-02 | 1.1e-02,<br>-5.3e-02,<br>2.1e-02 | 1.8e-01,<br>6.1e-02,<br>4.6e-02 | 8.2e-01,<br>2.0e-03,<br>9.2e-03  |
| cML-MA-BIC-DP-Max  | 4.3e-01,<br>3.6e-01,<br>4.6e-01 | 3.4e-01,<br>2.9e-01,<br>3.0e-01 | 4.2e-01,<br>3.8e-01,<br>4.7e-01 | 2.9e-01,<br>-7.9e-03,<br>7.5e-03 | 8.8e-02,<br>1.6e-01,<br>9.3e-02 | 6.5e-01,<br>-1.7e-02,<br>3.7e-02 | 1.9e-02,<br>-5.4e-02,<br>2.3e-02 | 1.3e-01,<br>7.3e-02,<br>4.9e-02 | 8.2e-01,<br>2.5e-03,<br>1.1e-02  |
| cML-BIC-DP-Max     | 4.3e-01,<br>3.6e-01,<br>4.6e-01 | 3.4e-01,<br>2.9e-01,<br>3.0e-01 | 4.2e-01,<br>3.8e-01,<br>4.7e-01 | 3.4e-01,<br>-7.5e-03,<br>7.9e-03 | 6.9e-02,<br>1.6e-01,<br>8.9e-02 | 7.2e-01,<br>-1.4e-02,<br>3.9e-02 | 1.8e-02,<br>-5.4e-02,<br>2.3e-02 | 1.3e-01,<br>7.3e-02,<br>4.8e-02 | 9.3e-01,<br>9.8e-04,<br>1.1e-02  |
| cML-MA-BIC-DP      | 4.3e-01,<br>3.6e-01,<br>4.6e-01 | 3.4e-01,<br>2.9e-01,<br>3.0e-01 | 4.2e-01,<br>3.8e-01,<br>4.7e-01 | 3.2e-01,<br>-7.6e-03,<br>7.7e-03 | 1.2e-01,<br>1.6e-01,<br>9.9e-02 | 6.6e-01,<br>-1.7e-02,<br>3.8e-02 | 2.1e-02,<br>-5.5e-02,<br>2.4e-02 | 1.3e-01,<br>7.4e-02,<br>4.9e-02 | 7.5e-01,<br>3.4e-03,<br>1.1e-02  |
| cML-BIC-DP         | 4.3e-01,<br>3.6e-01,<br>4.6e-01 | 3.4e-01,<br>2.9e-01,<br>3.0e-01 | 4.2e-01,<br>3.8e-01,<br>4.7e-01 | 3.4e-01,<br>-7.5e-03,<br>7.9e-03 | 1.3e-01,<br>1.6e-01,<br>1.0e-01 | 7.2e-01,<br>-1.4e-02,<br>3.9e-02 | 2.0e-02,<br>-5.5e-02,<br>2.4e-02 | 1.3e-01,<br>7.3e-02,<br>4.8e-02 | 7.1e-01,<br>4.2e-03,<br>1.1e-02  |
| MR-Mix             | NA                              | NA                              | NA                              | 3.1e-01,<br>-1.5e-02,<br>1.5e-02 | 5.1e-02,<br>3.9e-01,<br>2.0e-01 | 5.2e-01,<br>1.0e-02,<br>1.6e-02  | 2.9e-01,<br>-7.0e-02,<br>6.6e-02 | 3.4e-01,<br>2.0e-02,<br>2.1e-02 | 1.0e-01,<br>3.0e-02,<br>1.8e-02  |
| MR-ContMix         | NA                              | NA                              | NA                              | 4.4e-01,<br>-7.1e-03,<br>NA      | 8.9e-02,<br>1.6e-01,<br>NA      | 9.9e-01,<br>-8.4e-05,<br>NA      | 7.9e-03,<br>-6.5e-02,<br>NA      | 1.0e-01,<br>1.1e-01,<br>NA      | 3.8e-01,<br>6.9e-03,<br>NA       |
| MR-Lasso           | NA                              | NA                              | NA                              | 2.5e-01,<br>-7.4e-03,<br>6.4e-03 | 1.0e-01,<br>1.4e-01,<br>8.9e-02 | 5.2e-01,<br>-2.3e-02,<br>3.6e-02 | 3.9e-03,<br>-6.0e-02,<br>2.1e-02 | 9.1e-02,<br>7.7e-02,<br>4.6e-02 | 5.5e-01,<br>5.5e-03,<br>9.3e-03  |
| MR-PRESSO          | NA                              | NA                              | NA                              | 1.4e-01,<br>-8.5e-03,<br>5.7e-03 | 9.2e-02,<br>1.6e-01,<br>9.2e-02 | 3.8e-01,<br>-3.4e-02,<br>3.8e-02 | 4.0e-03,<br>-6.0e-02,<br>2.0e-02 | 1.8e-01,<br>6.1e-02,<br>4.5e-02 | 8.0e-01,<br>-2.9e-03,<br>1.2e-02 |
| MR-IVW             | NA                              | NA                              | NA                              | 1.9e-01,<br>-8.5e-03,<br>6.4e-03 | 8.6e-02,<br>1.6e-01,<br>9.2e-02 | 3.8e-01,<br>-3.4e-02,<br>3.8e-02 | 3.9e-03,<br>-6.0e-02,<br>2.1e-02 | 1.8e-01,<br>6.1e-02,<br>4.5e-02 | 8.0e-01,<br>-2.9e-03,<br>1.2e-02 |
| MR-Egger           | NA                              | NA                              | NA                              | 3.7e-01,<br>9.8e-03,<br>1.1e-02  | 4.3e-01,<br>1.1e-01,<br>1.4e-01 | 6.5e-01,<br>-2.9e-02,<br>6.4e-02 | 3.0e-01,<br>-3.8e-02,<br>3.6e-02 | 3.4e-01,<br>7.4e-02,<br>7.7e-02 | 6.3e-01,<br>-9.7e-03,<br>2.0e-02 |
| MR-Weighted-Median | NA                              | NA                              | NA                              | 6.9e-01,<br>4.3e-03,<br>1.1e-02  | 1.8e-01,<br>1.6e-01,<br>1.2e-01 | 2.0e-01,<br>-6.6e-02,<br>5.2e-02 | 9.3e-02,<br>-5.3e-02,<br>3.2e-02 | 3.1e-01,<br>6.9e-02,<br>6.7e-02 | 8.1e-01,<br>3.3e-03,<br>1.4e-02  |
| MR-Weighted-Mode   | NA                              | NA                              | NA                              | 3.6e-01,<br>1.0e-02,<br>1.1e-02  | 1.5e-01,<br>1.5e-01,<br>1.0e-01 | 2.1e-01,<br>-5.6e-02,<br>4.5e-02 | 1.3e-01,<br>-4.8e-02,<br>3.1e-02 | 2.4e-01,<br>7.7e-02,<br>6.5e-02 | 8.3e-01,<br>2.7e-03,<br>1.3e-02  |
| MR-RAPS1           | NA                              | NA                              | NA                              | 1.9e-01,<br>-8.5e-03,<br>6.5e-03 | 7.2e-02,<br>1.6e-01,<br>8.8e-02 | 3.6e-01,<br>-3.5e-02,<br>3.8e-02 | 3.9e-03,<br>-6.0e-02,<br>2.1e-02 | 1.9e-01,<br>6.2e-02,<br>4.8e-02 | 6.7e-01,<br>-4.9e-03,<br>1.1e-02 |
| MR-RAPS2           | NA                              | NA                              | NA                              | 2.5e-01,<br>-7.7e-03,<br>6.6e-03 | 1.0e-01,<br>1.5e-01,<br>9.4e-02 | 5.6e-01,<br>-2.2e-02,<br>3.9e-02 | 1.2e-02,<br>-5.4e-02,<br>2.1e-02 | 1.3e-01,<br>7.3e-02,<br>4.8e-02 | 9.5e-01,<br>7.2e-04,<br>1.1e-02  |
| MR-RAPS3           | NA                              | NA                              | NA                              | 1.9e-01,<br>-8.5e-03,<br>6.5e-03 | 5.3e-02,<br>1.6e-01,<br>8.2e-02 | 3.1e-01,<br>-3.4e-02,<br>3.3e-02 | 3.9e-03,<br>-6.0e-02,<br>2.1e-02 | 1.8e-01,<br>6.1e-02,<br>4.6e-02 | 7.5e-01,<br>-3.0e-03,<br>9.2e-03 |
| MR-RAPS4           | NA                              | NA                              | NA                              | 2.5e-01,<br>-7.7e-03,<br>6.6e-03 | 6.3e-02,<br>1.6e-01,<br>8.4e-02 | 5.9e-01,<br>-1.8e-02,<br>3.4e-02 | 1.2e-02,<br>-5.4e-02,<br>2.1e-02 | 1.2e-01,<br>7.3e-02,<br>4.7e-02 | 6.4e-01,<br>4.4e-03,<br>9.4e-03  |

Table S16: Secondary real data analysis, set 5.

| Method \ Exp/Out   | LDL/IHC (67)               | LDL/RA (71)                | LDL/SCZ (69)               | LDL/T2D (67)               | RA/SCZ (47)               | SCZ/ASmk (35)              | SCZ/CIQ (20)               | SCZ/FP (34)                | SCZ/FSmk (35)              |
|--------------------|----------------------------|----------------------------|----------------------------|----------------------------|---------------------------|----------------------------|----------------------------|----------------------------|----------------------------|
| cML-MA-BIC-Max     | 4.7e-01, -2.8e-02, 3.9e-02 | 7.9e-01, -9.9e-03, 3.7e-02 | 7.6e-01, -8.7e-03, 2.8e-02 | 1.2e-03, -1.7e-01, 5.3e-02 | 1.6e-01, 1.8e-02, 1.3e-02 | 5.0e-01, -3.8e-03, 5.6e-03 | 4.6e-01, -3.1e-02, 4.3e-02 | 6.0e-01, -9.7e-03, 1.9e-02 | 6.9e-01, -1.6e-02, 4.2e-02 |
| cML-BIC-Max        | 5.0e-01, -2.6e-02, 3.8e-02 | 8.2e-01, -8.6e-03, 3.7e-02 | 7.7e-01, -8.2e-03, 2.8e-02 | 1.9e-03, -1.6e-01, 5.0e-02 | 2.0e-01, 1.6e-02, 1.2e-02 | 5.1e-01, -3.7e-03, 5.6e-03 | 4.4e-01, -3.3e-02, 4.2e-02 | 5.1e-01, -1.2e-02, 1.8e-02 | 7.8e-01, -1.1e-02, 3.9e-02 |
| cML-MA-BIC         | 4.8e-01, -2.7e-02, 3.8e-02 | 7.8e-01, -1.0e-02, 3.7e-02 | 7.6e-01, -8.5e-03, 2.8e-02 | 1.1e-03, -1.7e-01, 5.3e-02 | 1.6e-01, 1.8e-02, 1.3e-02 | 5.0e-01, -3.8e-03, 5.6e-03 | 5.0e-01, -2.9e-02, 4.3e-02 | 5.0e-01, -1.2e-02, 1.9e-02 | 6.7e-01, -1.8e-02, 4.2e-02 |
| cML-BIC            | 5.0e-01, -2.6e-02, 3.8e-02 | 8.2e-01, -8.6e-03, 3.7e-02 | 7.7e-01, -8.2e-03, 2.8e-02 | 6.4e-04, -1.7e-01, 5.1e-02 | 2.0e-01, 1.6e-02, 1.2e-02 | 5.1e-01, -3.7e-03, 5.6e-03 | 4.4e-01, -3.3e-02, 4.2e-02 | 5.1e-01, -1.2e-02, 1.8e-02 | 7.8e-01, -1.1e-02, 3.9e-02 |
| cML-MA-BIC-DP-Max  | 5.4e-01, -2.9e-02, 4.7e-02 | 7.6e-01, -1.2e-02, 4.1e-02 | 8.1e-01, -7.6e-03, 3.1e-02 | 1.1e-02, -1.7e-01, 7.0e-02 | 3.2e-01, 1.6e-02, 1.6e-02 | 5.4e-01, -4.0e-03, 6.5e-03 | 6.1e-01, -2.6e-02, 5.0e-02 | 7.6e-01, -7.1e-03, 2.3e-02 | 6.6e-01, -2.3e-02, 5.3e-02 |
| cML-BIC-DP-Max     | 4.7e-01, -2.9e-02, 4.1e-02 | 7.9e-01, -1.0e-02, 3.8e-02 | 8.2e-01, -7.2e-03, 3.2e-02 | 8.2e-03, -1.8e-01, 6.8e-02 | 3.4e-01, 1.4e-02, 1.5e-02 | 5.5e-01, -3.5e-03, 5.8e-03 | 6.1e-01, -2.6e-02, 5.2e-02 | 7.7e-01, -6.2e-03, 2.2e-02 | 5.9e-01, -2.9e-02, 5.5e-02 |
| cML-MA-BIC-DP      | 5.8e-01, -2.8e-02, 5.2e-02 | 7.6e-01, -1.3e-02, 4.2e-02 | 8.1e-01, -7.6e-03, 3.1e-02 | 1.2e-02, -1.8e-01, 7.1e-02 | 3.2e-01, 1.6e-02, 1.6e-02 | 5.4e-01, -4.0e-03, 6.6e-03 | 6.6e-01, -2.4e-02, 5.5e-02 | 7.7e-01, -7.1e-03, 2.4e-02 | 6.5e-01, -2.5e-02, 5.5e-02 |
| cML-BIC-DP         | 5.8e-01, -2.7e-02, 4.9e-02 | 7.6e-01, -1.3e-02, 4.4e-02 | 8.2e-01, -7.2e-03, 3.2e-02 | 8.2e-03, -1.8e-01, 6.8e-02 | 3.4e-01, 1.4e-02, 1.5e-02 | 5.3e-01, -4.4e-03, 7.0e-03 | 6.1e-01, -2.6e-02, 5.2e-02 | 7.2e-01, -9.1e-03, 2.5e-02 | 5.9e-01, -2.9e-02, 5.5e-02 |
| MR-Mix             | 1.0e+00, 0.0e+00, 3.6e-02  | 7.8e-01, 1.0e-02, 3.6e-02  | 5.2e-01, -1.0e-02, 1.6e-02 | 1.5e-02, -9.0e-02, 3.7e-02 | 9.7e-02, 3.0e-02, 1.8e-02 | 5.7e-01, -2.0e-02, 3.5e-02 | 1.0e+00, -2.0e-17, 9.9e-02 | 4.9e-01, -1.0e-01, 1.5e-01 | 1.3e-01, -1.0e-01, 6.6e-02 |
| MR-ContMix         | 8.1e-01, -9.2e-03, NA      | 3.7e-01, -3.4e-02, NA      | 8.3e-01, -1.2e-02, NA      | 4.2e-02, -1.4e-01, NA      | 8.3e-02, 2.4e-02, NA      | 6.9e-02, -1.4e-02, NA      | 5.5e-01, -2.7e-02, NA      | 9.3e-01, 8.4e-04, NA       | 1.6e-01, -6.8e-02, NA      |
| MR-Lasso           | 5.2e-01, -2.6e-02, 4.0e-02 | 5.2e-01, -2.5e-02, 3.9e-02 | 7.3e-01, -9.5e-03, 2.8e-02 | 8.8e-06, -2.3e-01, 5.1e-02 | 1.2e-01, 2.0e-02, 1.3e-02 | 5.1e-01, -3.6e-03, 5.5e-03 | 8.1e-01, -1.1e-02, 4.6e-02 | 5.5e-01, -1.1e-02, 1.8e-02 | 1.1e-01, -6.7e-02, 4.2e-02 |
| MR-PRESSO          | 3.3e-01, -4.3e-02, 4.4e-02 | 8.3e-01, -8.6e-03, 3.9e-02 | 9.8e-01, -7.5e-04, 3.2e-02 | 1.1e-02, -1.7e-01, 6.5e-02 | 1.7e-01, 2.0e-02, 1.4e-02 | 4.5e-01, -3.6e-03, 4.7e-03 | 5.3e-01, -3.2e-02, 5.0e-02 | 5.7e-01, -1.1e-02, 2.0e-02 | 8.1e-01, -1.0e-02, 4.4e-02 |
| MR-IVW             | 3.3e-01, -4.3e-02, 4.4e-02 | 7.3e-01, 2.6e-02, 7.5e-02  | 7.9e-01, -1.0e-02, 3.8e-02 | 2.2e-02, -1.5e-01, 6.7e-02 | 6.0e-01, 9.7e-03, 1.8e-02 | 5.1e-01, -3.6e-03, 5.5e-03 | 5.2e-01, -3.2e-02, 5.0e-02 | 9.5e-01, -1.3e-03, 2.2e-02 | 8.1e-01, -1.0e-02, 4.4e-02 |
| MR-Egger           | 3.3e-01, 6.8e-02, 7.1e-02  | 6.8e-01, 5.0e-02, 1.2e-01  | 4.1e-01, 4.9e-02, 6.0e-02  | 7.6e-03, -3.2e-01, 1.2e-01 | 8.6e-02, 5.7e-02, 3.3e-02 | 4.2e-01, -1.9e-02, 2.4e-02 | 6.5e-03, 9.0e-01, 3.3e-01  | 2.7e-01, -9.7e-02, 8.8e-02 | 1.3e-02, 4.2e-01, 1.7e-01  |
| MR-Weighted-Median | 4.6e-01, -4.6e-02, 6.2e-02 | 1.0e+00, 0.0e+00, 5.4e-02  | 3.5e-01, 3.9e-02, 4.2e-02  | 4.4e-02, -1.7e-01, 8.4e-02 | 4.8e-02, 3.7e-02, 1.9e-02 | 2.5e-01, -8.7e-03, 7.6e-03 | 4.5e-01, -4.6e-02, 6.0e-02 | 5.4e-01, -1.7e-02, 2.7e-02 | 2.6e-01, -6.5e-02, 5.8e-02 |
| MR-Weighted-Mode   | 8.9e-01, 8.3e-03, 5.8e-02  | 8.5e-01, -9.8e-03, 5.3e-02 | 5.1e-01, 2.5e-02, 3.8e-02  | 4.8e-02, -1.7e-01, 8.4e-02 | 8.0e-02, 3.3e-02, 1.9e-02 | 1.7e-01, -1.9e-02, 1.4e-02 | 6.3e-01, -4.7e-02, 9.8e-02 | 8.3e-01, -9.0e-03, 4.1e-02 | 4.3e-01, -1.1e-01, 1.5e-01 |
| MR-RAPS1           | 3.6e-01, -3.9e-02, 4.3e-02 | 5.6e-01, 4.2e-02, 7.2e-02  | 8.2e-01, -8.1e-03, 3.6e-02 | 3.0e-03, -2.0e-01, 6.6e-02 | 4.6e-01, 1.3e-02, 1.7e-02 | 5.1e-01, -3.7e-03, 5.6e-03 | 5.4e-01, -3.1e-02, 5.0e-02 | 8.7e-01, -3.6e-03, 2.2e-02 | 8.2e-01, -9.9e-03, 4.4e-02 |
| MR-RAPS2           | 4.4e-01, -3.1e-02, 4.0e-02 | 6.3e-01, -1.8e-02, 3.8e-02 | 9.0e-01, -3.7e-03, 3.1e-02 | 2.8e-03, -2.0e-01, 6.6e-02 | 3.1e-01, 1.7e-02, 1.7e-02 | 4.2e-01, -4.6e-03, 5.8e-03 | 6.1e-01, -2.7e-02, 5.2e-02 | 7.6e-01, -6.6e-03, 2.2e-02 | 5.1e-01, -2.9e-02, 4.4e-02 |
| MR-RAPS3           | 2.6e-01, -4.3e-02, 3.8e-02 | 4.7e-01, 2.7e-02, 3.8e-02  | 7.0e-01, -1.0e-02, 2.8e-02 | 1.9e-03, -1.6e-01, 5.0e-02 | 4.2e-01, 9.9e-03, 1.2e-02 | 5.1e-01, -3.7e-03, 5.6e-03 | 4.5e-01, -3.3e-02, 4.3e-02 | 9.4e-01, -1.4e-03, 1.8e-02 | 7.9e-01, -1.1e-02, 4.0e-02 |
| MR-RAPS4           | 4.4e-01, -3.0e-02, 3.9e-02 | 6.3e-01, -1.8e-02, 3.8e-02 | 8.7e-01, -4.7e-03, 2.8e-02 | 8.7e-01, -1.9e-01, 5.2e-02 | 1.7e-01, 1.7e-02, 1.3e-02 | 4.2e-01, -4.6e-03, 5.8e-03 | 5.5e-01, -2.7e-02, 4.4e-02 | 6.9e-01, -7.3e-03, 1.8e-02 | 4.3e-01, -3.2e-02, 4.1e-02 |

Table S17: Secondary real data analysis, set 6.

| Method \ Exp/Out   | SCZ/Height (35)                  | SCZ/HOMA (35)                    | SCZ/IHC (35)                     | SCZ/LDL (36)                     | SCZ/RA (69)                      | SCZ/T2D (35)                     | T2D/ASmk (10)                    | T2D/ANRX (6)                     | T2D/CIQ (7)                     |
|--------------------|----------------------------------|----------------------------------|----------------------------------|----------------------------------|----------------------------------|----------------------------------|----------------------------------|----------------------------------|---------------------------------|
| cML-MA-BIC-Max     | 3.6e-01,<br>-8.1e-03,<br>8.9e-03 | 2.2e-01,<br>9.9e-03,<br>8.1e-03  | 8.0e-01,<br>-9.2e-03,<br>3.6e-02 | 8.9e-01,<br>-1.7e-03,<br>1.2e-02 | 3.0e-01,<br>2.7e-02,<br>2.6e-02  | 8.9e-01,<br>6.2e-03,<br>4.4e-02  | 7.6e-01,<br>-1.8e-03,<br>5.8e-03 | 9.0e-01,<br>1.2e-02,<br>9.9e-02  | 6.6e-01,<br>1.7e-02,<br>3.8e-02 |
| cML-BIC-Max        | 4.2e-01,<br>-6.2e-03,<br>7.7e-03 | 2.2e-01,<br>9.9e-03,<br>8.1e-03  | 7.6e-01,<br>-1.1e-02,<br>3.5e-02 | 9.5e-01,<br>-7.9e-04,<br>1.2e-02 | 2.5e-01,<br>2.9e-02,<br>2.6e-02  | 9.1e-01,<br>5.0e-03,<br>4.4e-02  | 7.6e-01,<br>-1.8e-03,<br>5.8e-03 | 8.9e-01,<br>1.3e-02,<br>9.9e-02  | 6.7e-01,<br>1.6e-02,<br>3.8e-02 |
| cML-MA-BIC         | 2.2e-01,<br>-1.1e-02,<br>8.6e-03 | 2.2e-01,<br>9.8e-03,<br>8.1e-03  | 7.5e-01,<br>-1.2e-02,<br>3.6e-02 | 8.9e-01,<br>-1.8e-03,<br>1.2e-02 | 3.0e-01,<br>2.7e-02,<br>2.6e-02  | 8.9e-01,<br>6.3e-03,<br>4.4e-02  | 7.6e-01,<br>-1.8e-03,<br>5.8e-03 | 9.1e-01,<br>1.2e-02,<br>9.9e-02  | 6.5e-01,<br>1.8e-02,<br>3.8e-02 |
| cML-BIC            | 6.5e-02,<br>-1.4e-02,<br>7.9e-03 | 2.2e-01,<br>9.9e-03,<br>8.1e-03  | 7.6e-01,<br>-1.1e-02,<br>3.5e-02 | 9.5e-01,<br>-7.9e-04,<br>1.2e-02 | 2.5e-01,<br>2.9e-02,<br>2.6e-02  | 9.1e-01,<br>5.0e-03,<br>4.4e-02  | 7.6e-01,<br>-1.8e-03,<br>5.8e-03 | 8.9e-01,<br>1.3e-02,<br>9.9e-02  | 6.7e-01,<br>1.6e-02,<br>3.8e-02 |
| cML-MA-BIC-DP-Max  | 8.5e-01,<br>-3.0e-03,<br>1.5e-02 | 2.5e-01,<br>1.0e-02,<br>8.8e-03  | 8.9e-01,<br>-6.9e-03,<br>4.9e-02 | 9.7e-01,<br>-6.3e-04,<br>1.8e-02 | 3.9e-01,<br>2.9e-02,<br>3.4e-02  | 8.5e-01,<br>1.0e-02,<br>5.5e-02  | 8.2e-01,<br>-1.3e-03,<br>5.8e-03 | 8.3e-01,<br>2.5e-02,<br>1.2e-01  | 7.1e-01,<br>1.8e-02,<br>4.3e-02 |
| cML-BIC-DP-Max     | 9.2e-01,<br>-1.4e-03,<br>1.4e-02 | 2.2e-01,<br>1.0e-02,<br>8.5e-03  | 9.5e-01,<br>-3.0e-03,<br>4.6e-02 | 9.8e-01,<br>5.3e-04,<br>1.8e-02  | 3.9e-01,<br>2.9e-02,<br>3.4e-02  | 8.4e-01,<br>1.1e-02,<br>5.4e-02  | 8.3e-01,<br>-1.2e-03,<br>5.7e-03 | 8.2e-01,<br>2.7e-02,<br>1.2e-01  | 7.0e-01,<br>1.6e-02,<br>4.2e-02 |
| cML-MA-BIC-DP      | 8.1e-01,<br>-3.9e-03,<br>1.6e-02 | 2.6e-01,<br>9.9e-03,<br>8.9e-03  | 8.3e-01,<br>-1.2e-02,<br>5.5e-02 | 9.7e-01,<br>-6.4e-04,<br>1.8e-02 | 3.9e-01,<br>2.9e-02,<br>3.4e-02  | 8.5e-01,<br>1.0e-02,<br>5.5e-02  | 8.2e-01,<br>-1.3e-03,<br>5.9e-03 | 8.4e-01,<br>2.4e-02,<br>1.2e-01  | 7.1e-01,<br>1.7e-02,<br>4.5e-02 |
| cML-BIC-DP         | 8.6e-01,<br>-3.3e-03,<br>1.9e-02 | 2.2e-01,<br>1.0e-02,<br>8.5e-03  | 8.1e-01,<br>-1.5e-02,<br>6.0e-02 | 9.8e-01,<br>5.3e-04,<br>1.8e-02  | 3.9e-01,<br>2.9e-02,<br>3.4e-02  | 8.4e-01,<br>1.1e-02,<br>5.4e-02  | 8.3e-01,<br>-1.2e-03,<br>5.7e-03 | 8.2e-01,<br>2.7e-02,<br>1.2e-01  | 7.0e-01,<br>1.6e-02,<br>4.2e-02 |
| MR-Mix             | 1.9e-01,<br>-4.0e-02,<br>3.0e-02 | 2.0e-01,<br>5.0e-02,<br>3.9e-02  | 8.1e-01,<br>-1.2e-01,<br>5.1e-01 | 1.0e+00,<br>2.0e-17,<br>5.8e-02  | 8.9e-01,<br>-2.0e-02,<br>1.5e-01 | 1.0e+00,<br>2.0e-17,<br>6.5e-02  | 7.9e-01,<br>-1.5e-02,<br>5.5e-02 | 8.4e-01,<br>2.5e-02,<br>1.2e-01  | 1.0e+00,<br>2.0e-17,<br>2.0e-01 |
| MR-ContMix         | 9.3e-01,<br>2.8e-04,<br>NA       | 2.9e-01,<br>1.1e-02,<br>NA       | 1.2e-02,<br>-1.7e-01,<br>NA      | 1.5e-01,<br>2.1e-02,<br>NA       | 4.6e-01,<br>2.7e-02,<br>NA       | 6.3e-02,<br>1.4e-01,<br>NA       | 5.2e-01,<br>-1.5e-02,<br>NA      | 6.4e-01,<br>-5.1e-02,<br>NA      | 1.7e-01,<br>6.6e-02,<br>NA      |
| MR-Lasso           | 6.0e-01,<br>-5.3e-03,<br>1.0e-02 | 3.3e-01,<br>7.8e-03,<br>8.1e-03  | 7.9e-01,<br>-1.1e-02,<br>4.0e-02 | 5.7e-01,<br>-7.7e-03,<br>1.4e-02 | 7.6e-01,<br>8.4e-03,<br>2.7e-02  | 6.3e-01,<br>2.5e-02,<br>5.2e-02  | 7.6e-01,<br>-1.7e-03,<br>5.7e-03 | 8.9e-01,<br>1.3e-02,<br>9.8e-02  | 7.2e-01,<br>1.6e-02,<br>4.4e-02 |
| MR-PRESSO          | 7.9e-01,<br>3.2e-03,<br>1.2e-02  | 1.5e-01,<br>9.8e-03,<br>6.6e-03  | 7.9e-01,<br>-1.1e-02,<br>4.0e-02 | 9.6e-01,<br>-7.5e-04,<br>1.6e-02 | 3.4e-01,<br>2.8e-02,<br>3.0e-02  | 9.3e-01,<br>4.8e-03,<br>5.3e-02  | 7.2e-01,<br>-1.7e-03,<br>4.6e-03 | 8.7e-01,<br>1.3e-02,<br>7.5e-02  | 7.3e-01,<br>1.6e-02,<br>4.4e-02 |
| MR-IVW             | 2.1e-01,<br>2.1e-02,<br>1.7e-02  | 2.2e-01,<br>9.8e-03,<br>8.0e-03  | 7.6e-01,<br>1.4e-02,<br>4.5e-02  | 9.6e-01,<br>-7.5e-04,<br>1.6e-02 | 3.4e-01,<br>2.8e-02,<br>3.0e-02  | 9.3e-01,<br>4.8e-03,<br>5.3e-02  | 7.6e-01,<br>-1.7e-03,<br>5.7e-03 | 8.9e-01,<br>1.3e-02,<br>9.8e-02  | 7.2e-01,<br>1.6e-02,<br>4.4e-02 |
| MR-Egger           | 3.8e-01,<br>-6.3e-02,<br>7.3e-02 | 7.7e-01,<br>-1.1e-02,<br>3.7e-02 | 8.9e-01,<br>-2.6e-02,<br>2.0e-01 | 6.6e-01,<br>3.1e-02,<br>7.1e-02  | 8.9e-02,<br>2.3e-01,<br>1.4e-01  | 8.7e-01,<br>4.0e-02,<br>2.4e-01  | 9.7e-02,<br>5.3e-02,<br>3.2e-02  | 6.6e-01,<br>-3.3e-01,<br>7.6e-01 | 2.0e-01,<br>3.2e-01,<br>2.5e-01 |
| MR-Weighted-Median | 7.1e-01,<br>-4.5e-03,<br>1.2e-02 | 6.6e-01,<br>4.9e-03,<br>1.1e-02  | 8.3e-01,<br>-1.2e-02,<br>5.3e-02 | 6.9e-01,<br>7.5e-03,<br>1.9e-02  | 1.0e+00,<br>0.0e+00,<br>4.0e-02  | 1.0e+00,<br>0.0e+00,<br>6.9e-02  | 9.8e-01,<br>-2.3e-04,<br>7.6e-03 | 8.9e-01,<br>-1.7e-02,<br>1.2e-01 | 5.9e-01,<br>2.7e-02,<br>5.0e-02 |
| MR-Weighted-Mode   | 6.4e-01,<br>-7.4e-03,<br>1.6e-02 | 9.0e-01,<br>2.3e-03,<br>1.9e-02  | 4.9e-02,<br>-2.0e-01,<br>1.0e-01 | 5.6e-01,<br>1.8e-02,<br>3.2e-02  | 5.4e-01,<br>5.2e-02,<br>8.4e-02  | 9.2e-01,<br>-1.3e-02,<br>1.4e-01 | 4.2e-01,<br>9.6e-03,<br>1.2e-02  | 8.0e-01,<br>-4.4e-02,<br>1.8e-01 | 5.5e-01,<br>4.7e-02,<br>7.8e-02 |
| MR-RAPS1           | 2.8e-01,<br>1.8e-02,<br>1.7e-02  | 2.2e-01,<br>9.9e-03,<br>8.2e-03  | 7.2e-01,<br>1.6e-02,<br>4.5e-02  | 9.3e-01,<br>-1.4e-03,<br>1.6e-02 | 2.8e-01,<br>3.3e-02,<br>3.1e-02  | 8.9e-01,<br>7.3e-03,<br>5.3e-02  | 7.6e-01,<br>-1.8e-03,<br>5.8e-03 | 8.9e-01,<br>1.3e-02,<br>9.9e-02  | 6.6e-01,<br>1.7e-02,<br>4.0e-02 |
| MR-RAPS2           | 6.9e-01,<br>5.9e-03,<br>1.5e-02  | 2.6e-01,<br>9.4e-03,<br>8.4e-03  | 9.7e-01,<br>-1.9e-03,<br>4.5e-02 | 9.4e-01,<br>-1.3e-03,<br>1.7e-02 | 3.9e-01,<br>2.6e-02,<br>3.1e-02  | 8.0e-01,<br>1.5e-02,<br>5.8e-02  | 7.5e-01,<br>-1.9e-03,<br>6.0e-03 | 9.6e-01,<br>4.9e-03,<br>1.0e-01  | 6.1e-01,<br>2.2e-02,<br>4.4e-02 |
| MR-RAPS3           | 2.7e-03,<br>2.4e-02,<br>8.1e-03  | 2.2e-01,<br>9.9e-03,<br>8.2e-03  | 6.9e-01,<br>1.4e-02,<br>3.5e-02  | 9.5e-01,<br>-7.9e-04,<br>1.3e-02 | 2.6e-01,<br>2.9e-02,<br>2.6e-02  | 9.1e-01,<br>5.0e-03,<br>4.5e-02  | 7.6e-01,<br>-1.8e-03,<br>5.8e-03 | 8.9e-01,<br>1.3e-02,<br>9.9e-02  | 6.7e-01,<br>1.6e-02,<br>3.8e-02 |
| MR-RAPS4           | 3.4e-01,<br>-7.1e-03,<br>7.5e-03 | 2.6e-01,<br>9.4e-03,<br>8.4e-03  | 6.7e-01,<br>-1.6e-02,<br>3.6e-02 | 9.6e-01,<br>-6.7e-04,<br>1.3e-02 | 3.3e-01,<br>2.6e-02,<br>2.7e-02  | 6.8e-01,<br>1.9e-02,<br>4.6e-02  | 7.5e-01,<br>-1.9e-03,<br>6.0e-03 | 9.6e-01,<br>4.9e-03,<br>1.0e-01  | 6.1e-01,<br>2.0e-02,<br>3.9e-02 |

Table S18: Secondary real data analysis, set 7.

| Method \ Exp/Out   | T2D/ESmk (10)              | T2D/FP (10)               | T2D/FSmk (10)             | T2D/Height (10)            | T2D/HOMA (10)              | T2D/IHC (10)               | T2D/LDL (10)               | T2D/RA (10)                | T2D/SCZ (8)                |
|--------------------|----------------------------|---------------------------|---------------------------|----------------------------|----------------------------|----------------------------|----------------------------|----------------------------|----------------------------|
| cML-MA-BIC-Max     | 6.4e-01, 1.4e-02, 3.0e-02  | 3.8e-01, 1.8e-02, 2.1e-02 | 7.5e-01, 1.3e-02, 4.1e-02 | 3.7e-01, -7.8e-03, 8.7e-03 | 6.2e-06, -5.0e-02, 1.1e-02 | 4.4e-01, -2.9e-02, 3.7e-02 | 5.8e-01, 5.4e-03, 9.8e-03  | 2.2e-01, -4.1e-02, 3.4e-02 | 5.5e-02, -5.9e-02, 3.1e-02 |
| cML-BIC-Max        | 6.6e-01, 1.3e-02, 3.0e-02  | 2.7e-01, 2.2e-02, 1.9e-02 | 7.5e-01, 1.3e-02, 4.1e-02 | 2.6e-01, -9.1e-03, 8.1e-03 | 2.7e-07, -4.9e-02, 9.5e-03 | 4.1e-01, -3.0e-02, 3.6e-02 | 5.4e-01, 5.9e-03, 9.6e-03  | 2.4e-01, -3.9e-02, 3.3e-02 | 5.6e-02, -5.8e-02, 3.0e-02 |
| cML-MA-BIC         | 6.4e-01, 1.4e-02, 3.0e-02  | 4.7e-01, 1.6e-02, 2.2e-02 | 7.5e-01, 1.3e-02, 4.1e-02 | 4.6e-01, -6.7e-03, 9.1e-03 | 3.5e-06, -5.1e-02, 1.1e-02 | 4.8e-01, -2.7e-02, 3.8e-02 | 5.9e-01, 5.3e-03, 9.9e-03  | 2.2e-01, -4.1e-02, 3.1e-02 | 5.5e-02, -5.9e-02, 3.1e-02 |
| cML-BIC            | 6.6e-01, 1.3e-02, 3.0e-02  | 2.7e-01, 2.2e-02, 1.9e-02 | 7.5e-01, 1.3e-02, 4.1e-02 | 2.6e-01, -9.1e-03, 8.1e-03 | 2.7e-07, -4.9e-02, 9.5e-03 | 4.1e-01, -3.0e-02, 3.6e-02 | 5.4e-01, 5.9e-03, 9.6e-03  | 2.4e-01, -3.9e-02, 3.3e-02 | 5.6e-02, -5.8e-02, 3.0e-02 |
| cML-MA-BIC-DP-Max  | 5.8e-01, 1.7e-02, 3.1e-02  | 4.2e-01, 2.4e-02, 3.1e-02 | 6.9e-01, 1.7e-02, 4.1e-02 | 5.7e-01, -7.1e-03, 1.3e-02 | 8.7e-03, -4.8e-02, 1.8e-02 | 5.2e-01, -2.5e-02, 3.8e-02 | 5.8e-01, 5.8e-03, 1.1e-02  | 3.1e-01, -3.8e-02, 3.7e-02 | 8.0e-02, -3.8e-02, 3.3e-02 |
| cML-BIC-DP-Max     | 5.9e-01, 1.6e-02, 3.0e-02  | 4.3e-01, 2.5e-02, 3.1e-02 | 6.8e-01, 1.7e-02, 4.0e-02 | 6.5e-01, -6.3e-03, 1.4e-02 | 9.9e-03, -4.8e-02, 1.9e-02 | 4.7e-01, -2.6e-02, 3.6e-02 | 4.8e-01, 6.9e-03, 9.7e-03  | 3.0e-01, -3.6e-02, 3.4e-02 | 6.0e-02, -5.8e-02, 3.1e-02 |
| cML-MA-BIC-DP      | 5.8e-01, 1.7e-02, 3.2e-02  | 4.6e-01, 2.4e-02, 3.3e-02 | 6.9e-01, 1.6e-02, 4.1e-02 | 6.4e-01, -6.5e-03, 1.4e-02 | 8.5e-03, -4.8e-02, 1.8e-02 | 5.7e-01, -2.3e-02, 4.1e-02 | 6.0e-01, 5.7e-03, 1.1e-02  | 3.1e-01, -3.8e-02, 3.7e-02 | 8.1e-02, -5.8e-02, 3.3e-02 |
| cML-BIC-DP         | 5.9e-01, 1.6e-02, 3.0e-02  | 4.3e-01, 2.5e-02, 3.1e-02 | 6.8e-01, 1.7e-02, 4.0e-02 | 6.5e-01, -6.3e-03, 1.4e-02 | 9.9e-03, -4.8e-02, 1.9e-02 | 4.7e-01, -2.6e-02, 3.6e-02 | 4.8e-01, 6.9e-03, 9.7e-03  | 3.0e-01, -3.6e-02, 3.4e-02 | 6.0e-02, -5.8e-02, 3.1e-02 |
| MR-Mix             | 7.6e-01, 1.5e-02, 5.0e-02  | 8.7e-01, 6.0e-02, 3.6e-01 | 8.0e-01, 1.5e-02, 5.8e-02 | 6.0e-01, -3.0e-02, 5.7e-02 | 8.8e-03, -3.5e-01, 1.3e-01 | 6.3e-01, -1.0e-01, 2.1e-01 | 8.3e-01, 2.5e-02, 1.2e-01  | 6.4e-01, -1.8e-01, 3.9e-01 | 4.7e-04, -2.5e-01, 7.1e-02 |
| MR-ContMix         | 1.5e-01, 5.8e-02, NA       | 2.1e-01, 3.8e-02, NA      | 9.0e-01, 1.5e-02, NA      | 1.2e-01, 2.2e-02, NA       | 9.1e-04, -5.2e-02, NA      | 1.0e+00, -4.9e-03, NA      | 7.8e-01, -2.5e-03, NA      | 4.3e-01, -9.7e-02, NA      | 4.3e-02, -1.3e-01, NA      |
| MR-Lasso           | 6.6e-01, 1.3e-02, 3.0e-02  | 5.0e-01, 2.0e-02, 3.0e-02 | 7.5e-01, 1.3e-02, 4.1e-02 | 3.3e-01, 1.1e-02, 1.1e-02  | 3.4e-02, -3.6e-02, 1.1e-02 | 4.3e-01, -3.0e-02, 3.8e-02 | 7.8e-01, -2.9e-03, 1.0e-02 | 3.7e-01, -3.8e-02, 4.2e-02 | 1.6e-01, -5.6e-02, 4.0e-02 |
| MR-PRESSO          | 6.6e-01, 1.3e-02, 2.9e-02  | 2.0e-01, 3.8e-02, 2.7e-02 | 6.3e-01, 1.3e-02, 2.6e-02 | 5.0e-01, 9.3e-03, 1.3e-02  | 2.0e-03, -5.6e-02, 1.1e-02 | 4.5e-01, -3.0e-02, 3.8e-02 | 5.6e-01, 5.7e-03, 9.5e-03  | 3.9e-01, -3.8e-02, 4.2e-02 | 2.1e-01, -5.6e-02, 4.0e-02 |
| MR-IVW             | 6.6e-01, 1.3e-02, 3.0e-02  | 2.9e-01, 4.8e-02, 4.5e-02 | 7.5e-01, 1.3e-02, 4.1e-02 | 5.7e-01, 1.8e-02, 3.1e-02  | 2.4e-02, -5.0e-02, 2.2e-02 | 4.3e-01, -3.0e-02, 3.8e-02 | 5.5e-01, 5.7e-03, 9.5e-03  | 3.7e-01, -3.8e-02, 4.2e-02 | 1.6e-01, -5.6e-02, 4.0e-02 |
| MR-Egger           | 4.1e-01, -1.3e-01, 1.6e-01 | 5.0e-01, 1.8e-01, 2.6e-01 | 6.2e-01, 1.1e-01, 2.2e-01 | 3.4e-01, -1.6e-01, 1.7e-01 | 9.9e-01, -1.5e-03, 1.3e-01 | 2.5e-01, -2.4e-01, 2.1e-01 | 1.1e-01, 8.3e-02, 5.1e-02  | 5.0e-01, 1.6e-01, 2.4e-01  | 3.5e-01, -2.3e-01, 2.5e-01 |
| MR-Weighted-Median | 8.2e-01, 9.5e-03, 4.2e-02  | 2.2e-01, 3.2e-02, 2.6e-02 | 7.5e-01, 1.7e-02, 5.3e-02 | 7.4e-01, -4.2e-03, 1.3e-02 | 1.3e-03, -4.1e-02, 1.3e-02 | 7.5e-01, -1.5e-02, 4.8e-02 | 5.2e-01, -8.3e-03, 1.3e-02 | 9.6e-01, -2.4e-03, 4.8e-02 | 4.8e-02, -8.5e-02, 4.3e-02 |
| MR-Weighted-Mode   | 2.7e-01, 9.3e-02, 8.5e-02  | 3.5e-01, 3.1e-02, 3.4e-02 | 9.2e-01, 7.0e-03, 7.0e-02 | 6.1e-01, 1.0e-02, 2.0e-02  | 4.7e-03, -4.4e-02, 1.6e-02 | 7.0e-01, -3.0e-02, 7.6e-02 | 4.4e-01, -1.6e-02, 2.1e-02 | 9.7e-01, -2.5e-03, 7.7e-02 | 1.3e-01, -1.1e-01, 7.1e-02 |
| MR-RAPS1           | 6.6e-01, 1.3e-02, 3.0e-02  | 1.8e-01, 6.5e-02, 4.9e-02 | 7.5e-01, 1.3e-02, 4.1e-02 | 7.0e-01, 1.1e-02, 2.8e-02  | 2.4e-02, -4.8e-02, 2.1e-02 | 4.1e-01, -3.0e-02, 3.7e-02 | 5.5e-01, 5.9e-03, 9.8e-03  | 3.1e-01, -3.7e-02, 3.6e-02 | 1.1e-01, -5.9e-02, 3.7e-02 |
| MR-RAPS2           | 5.4e-01, 1.9e-02, 3.1e-02  | 2.5e-01, 2.3e-02, 2.0e-02 | 7.8e-01, 1.2e-02, 4.2e-02 | 4.9e-01, -5.5e-03, 8.0e-03 | 3.2e-02, -4.7e-02, 2.2e-02 | 5.5e-01, -2.3e-02, 3.8e-02 | 8.1e-01, 2.4e-03, 1.0e-02  | 2.6e-01, -4.3e-02, 3.8e-02 | 1.4e-01, -6.2e-02, 4.1e-02 |
| MR-RAPS3           | 6.6e-01, 1.3e-02, 3.0e-02  | 9.8e-03, 5.3e-02, 2.1e-02 | 7.5e-01, 1.3e-02, 4.1e-02 | 1.8e-02, 2.5e-02, 1.0e-02  | 1.0e-08, -5.7e-02, 1.0e-02 | 4.1e-01, -3.0e-02, 3.7e-02 | 5.5e-01, 5.9e-03, 9.8e-03  | 2.5e-01, -3.9e-02, 3.4e-02 | 6.1e-02, -5.8e-02, 3.1e-02 |
| MR-RAPS4           | 5.4e-01, 1.9e-02, 3.1e-02  | 2.5e-01, 2.3e-02, 2.0e-02 | 7.8e-01, 1.2e-02, 4.2e-02 | 9.2e-01, 1.7e-01, 1.2e-02  | 5.9e-08, -4.9e-02, 9.1e-03 | 5.5e-01, -2.3e-02, 3.8e-02 | 8.1e-01, 2.4e-03, 1.0e-02  | 2.0e-01, -4.5e-02, 3.5e-02 | 4.9e-02, -6.3e-02, 3.2e-02 |

Table S19: Goodness-of-fit tests for secondary real data analysis, set 1.

| Method \ Exp/Out | FP/ASmk (6) | FP/ANRX (6) | FP/CIQ (4) | FP/ESmk (6) | FP/FSmk (6) | FP/Height (6) | FP/HOMA (6) | FP/IHC (6) | FP/LDL (5) |
|------------------|-------------|-------------|------------|-------------|-------------|---------------|-------------|------------|------------|
| GOF1-Max         | 4.5e-01     | 7.5e-01     | 7.2e-01    | 4.6e-01     | 4.4e-01     | 3.4e-02       | 2.3e-130    | 4.1e-01    | 1.1e-01    |
| GOF2-Max         | 4.3e-01     | 7.5e-01     | 7.2e-01    | 4.4e-01     | 4.4e-01     | 1.5e-02       | 1.0e-20     | 4.0e-01    | 9.7e-02    |
| GOF1             | 4.5e-01     | 7.5e-01     | 7.2e-01    | 4.6e-01     | 4.4e-01     | 3.4e-02       | 2.3e-130    | 4.1e-01    | 1.0e-04    |
| GOF2             | 4.3e-01     | 7.5e-01     | 7.2e-01    | 4.4e-01     | 4.4e-01     | 1.5e-02       | 1.0e-20     | 4.0e-01    | 1.0e-04    |

Table S20: Goodness-of-fit tests for secondary real data analysis, set 2.

| Method \ Exp/Out | FP/RA (6) | FP/SCZ (6) | FP/T2D (6) | Height/ASmk (310) | Height/ESmk (310) | Height/FP (307) | Height/FSmk (310) | Height/HOMA (303) | Height/RA (306) |
|------------------|-----------|------------|------------|-------------------|-------------------|-----------------|-------------------|-------------------|-----------------|
| GOF1-Max         | 4.3e-01   | 7.2e-01    | 1.6e-28    | 2.5e-01           | 1.4e-01           | 2.0e-01         | 2.7e-01           | 3.6e-01           | 1.7e-03         |
| GOF2-Max         | 4.4e-01   | 7.2e-01    | 9.4e-21    | 2.0e-01           | 1.8e-01           | 2.6e-01         | 2.2e-01           | 3.6e-01           | 1.8e-03         |
| GOF1             | 4.3e-01   | 7.2e-01    | 1.6e-28    | 2.5e-01           | 1.4e-01           | 2.4e-01         | 6.6e-02           | 1.9e-01           | 1.5e-02         |
| GOF2             | 4.4e-01   | 7.2e-01    | 9.4e-21    | 2.0e-01           | 1.8e-01           | 2.4e-01         | 3.9e-02           | 2.0e-01           | 1.2e-02         |

Table S21: Goodness-of-fit tests for secondary real data analysis, set 3.

| Method   | Exp/Out | Height/SCZ (288) | Height/T2D (307) | HOMA/ASmk (2) | HOMA/ESmk (2) | HOMA/FP (2) | HOMA/FSmk (2) | HOMA/Height (2) | HOMA/IHC (2) | HOMA/LDL (2) |
|----------|---------|------------------|------------------|---------------|---------------|-------------|---------------|-----------------|--------------|--------------|
| GOF1-Max |         | 3.4e-05          | 3.7e-04          | 1.4e-01       | 1.5e-01       | 1.2e-01     | 1.0e-01       | 1.1e-01         | 8.7e-02      | 7.1e-02      |
| GOF2-Max |         | 5.2e-05          | 1.9e-03          | 1.4e-01       | 1.5e-01       | 1.2e-01     | 1.0e-01       | 1.1e-01         | 8.9e-02      | 7.4e-02      |
| GOF1     |         | 1.4e-04          | 2.9e-04          | 1.4e-01       | 1.5e-01       | 1.2e-01     | 1.0e-01       | 1.1e-01         | 8.7e-02      | 7.1e-02      |
| GOF2     |         | 1.0e-04          | 5.3e-05          | 1.4e-01       | 1.5e-01       | 1.2e-01     | 1.0e-01       | 1.1e-01         | 8.9e-02      | 7.4e-02      |

Table S22: Goodness-of-fit tests for secondary real data analysis, set 4.

| Method   | Exp/Out | HOMA/RA (2) | HOMA/SCZ (2) | HOMA/T2D (2) | LDL/ASmk (69) | LDL/ANRX (52) | LDL/ESmk (69) | LDL/FP (68) | LDL/FSmk (69) | LDL/HOMA (68) |
|----------|---------|-------------|--------------|--------------|---------------|---------------|---------------|-------------|---------------|---------------|
| GOF1-Max |         | 1.4e-01     | 1.2e-01      | 1.3e-01      | 5.5e-01       | 4.7e-01       | 5.6e-01       | 1.2e-01     | 5.8e-01       | 3.3e-02       |
| GOF2-Max |         | 1.4e-01     | 1.2e-01      | 1.2e-01      | 5.6e-01       | 4.7e-01       | 5.7e-01       | 1.2e-01     | 5.9e-01       | 3.7e-02       |
| GOF1     |         | 1.4e-01     | 1.2e-01      | 1.3e-01      | 5.5e-01       | 4.7e-01       | 5.4e-01       | 1.2e-01     | 5.8e-01       | 3.3e-02       |
| GOF2     |         | 1.4e-01     | 1.2e-01      | 1.2e-01      | 5.6e-01       | 4.7e-01       | 5.0e-01       | 1.2e-01     | 5.9e-01       | 3.7e-02       |

Table S23: Goodness-of-fit tests for secondary real data analysis, set 5.

| Method   | Exp/Out | LDL/IHC (67) | LDL/RA (71) | LDL/SCZ (69) | LDL/T2D (67) | RA/SCZ (47) | SCZ/ASmk (35) | SCZ/CIQ (20) | SCZ/FP (34) | SCZ/FSmk (35) |
|----------|---------|--------------|-------------|--------------|--------------|-------------|---------------|--------------|-------------|---------------|
| GOF1-Max |         | 1.7e-01      | 1.9e-01     | 3.1e-01      | 8.8e-01      | 2.9e-03     | 3.7e-01       | 9.4e-01      | 3.8e-03     | 1.9e-01       |
| GOF2-Max |         | 2.0e-01      | 1.7e-01     | 3.2e-01      | 8.9e-01      | 3.0e-03     | 3.8e-01       | 9.4e-01      | 3.7e-03     | 2.0e-01       |
| GOF1     |         | 1.7e-01      | 1.9e-01     | 3.1e-01      | 6.8e-03      | 2.9e-03     | 3.7e-01       | 9.4e-01      | 3.8e-03     | 1.9e-01       |
| GOF2     |         | 2.0e-01      | 1.7e-01     | 3.2e-01      | 1.4e-02      | 3.0e-03     | 3.8e-01       | 9.4e-01      | 3.7e-03     | 2.0e-01       |

Table S24: Goodness-of-fit tests for secondary real data analysis, set 6.

| Method   | Exp/Out | SCZ/Height (35) | SCZ/HOMA (35) | SCZ/IHC (35) | SCZ/LDL (36) | SCZ/RA (69) | SCZ/T2D (35) | T2D/ASmk (10) | T2D/ANRX (6) | T2D/CIQ (7) |
|----------|---------|-----------------|---------------|--------------|--------------|-------------|--------------|---------------|--------------|-------------|
| GOF1-Max |         | 4.8e-08         | 4.4e-01       | 4.8e-05      | 3.5e-02      | 7.1e-01     | 2.2e-01      | 8.7e-01       | 3.4e-02      | 1.4e-01     |
| GOF2-Max |         | 3.1e-11         | 4.6e-01       | 4.9e-05      | 4.7e-02      | 7.5e-01     | 2.2e-01      | 8.6e-01       | 4.4e-02      | 1.7e-01     |
| GOF1     |         | 1.6e-07         | 4.4e-01       | 4.8e-05      | 3.5e-02      | 7.1e-01     | 2.2e-01      | 8.7e-01       | 3.4e-02      | 1.4e-01     |
| GOF2     |         | 1.1e-13         | 4.6e-01       | 4.9e-05      | 4.7e-02      | 7.5e-01     | 2.2e-01      | 8.6e-01       | 4.4e-02      | 1.7e-01     |

Table S25: Goodness-of-fit tests for secondary real data analysis, set 7.

| Method   | Exp/Out | T2D/ESmk (10) | T2D/FP (10) | T2D/FSmk (10) | T2D/Height (10) | T2D/HOMA (10) | T2D/IHC (10) | T2D/LDL (10) | T2D/RA (10) | T2D/SCZ (8) |
|----------|---------|---------------|-------------|---------------|-----------------|---------------|--------------|--------------|-------------|-------------|
| GOF1-Max |         | 1.0e+00       | 1.8e-03     | 9.1e-01       | 5.2e-01         | 7.2e-11       | 9.6e-01      | 9.4e-01      | 8.1e-01     | 8.7e-01     |
| GOF2-Max |         | 1.0e+00       | 6.0e-04     | 9.0e-01       | 5.2e-01         | 2.0e-12       | 9.6e-01      | 9.4e-01      | 8.0e-01     | 8.6e-01     |
| GOF1     |         | 1.0e+00       | 1.8e-03     | 9.1e-01       | 5.2e-01         | 7.2e-11       | 9.6e-01      | 9.4e-01      | 8.1e-01     | 8.7e-01     |
| GOF2     |         | 1.0e+00       | 6.0e-04     | 9.0e-01       | 5.2e-01         | 2.0e-12       | 9.6e-01      | 9.4e-01      | 8.0e-01     | 8.6e-01     |

Table S26: Main simulations: in each cell, from top to bottom are empirical type-I error/power, mean( $\hat{\theta}$ ), SD( $\hat{\theta}$ ), mean(SE( $\hat{\theta}$ )) when  $m = 10$ , ideal case,  $q = 0$ ,  $n = 50000$ .

| Methods \ $\theta$ | -0.1                                    | -0.05                                   | -0.03                                   | -0.01                                   | 0                                       | 0.01                                   | 0.03                                   | 0.05                                   | 0.1                                    |
|--------------------|-----------------------------------------|-----------------------------------------|-----------------------------------------|-----------------------------------------|-----------------------------------------|----------------------------------------|----------------------------------------|----------------------------------------|----------------------------------------|
| cML-MA-AIC         | 0.817,<br>-0.0867,<br>0.0292,<br>0.03   | 0.261,<br>-0.0394,<br>0.0262,<br>0.0298 | 0.086,<br>-0.0227,<br>0.0243,<br>0.0295 | 0.023,<br>-0.0078,<br>0.0228,<br>0.0294 | 0.014,<br>-0.0007,<br>0.0228,<br>0.0295 | 0.023,<br>0.0067,<br>0.0231,<br>0.0297 | 0.084,<br>0.0215,<br>0.0253,<br>0.0304 | 0.233,<br>0.0382,<br>0.0279,<br>0.0312 | 0.728,<br>0.0847,<br>0.0319,<br>0.0331 |
| cML-MA-AIC-Profile | 0.810,<br>-0.0869,<br>0.0292,<br>0.0302 | 0.254,<br>-0.0395,<br>0.0262,<br>0.0299 | 0.083,<br>-0.0228,<br>0.0244,<br>0.0297 | 0.023,<br>-0.0078,<br>0.0228,<br>0.0296 | 0.014,<br>-0.0007,<br>0.0228,<br>0.0297 | 0.023,<br>0.0067,<br>0.0232,<br>0.0299 | 0.084,<br>0.0215,<br>0.0253,<br>0.0306 | 0.231,<br>0.0382,<br>0.0280,<br>0.0314 | 0.728,<br>0.0849,<br>0.0319,<br>0.0333 |
| cML-AIC            | 0.904,<br>-0.0932,<br>0.0321,<br>0.0246 | 0.478,<br>-0.0446,<br>0.0307,<br>0.025  | 0.239,<br>-0.0263,<br>0.0297,<br>0.0253 | 0.085,<br>-0.0094,<br>0.0288,<br>0.0255 | 0.081,<br>-0.0009,<br>0.0290,<br>0.0257 | 0.084,<br>0.0079,<br>0.0292,<br>0.0258 | 0.208,<br>0.0251,<br>0.0310,<br>0.0261 | 0.413,<br>0.0436,<br>0.0323,<br>0.0264 | 0.872,<br>0.0922,<br>0.0343,<br>0.0271 |
| cML-AIC-Profile    | 0.906,<br>-0.0935,<br>0.0321,<br>0.0248 | 0.474,<br>-0.0447,<br>0.0307,<br>0.0252 | 0.234,<br>-0.0263,<br>0.0298,<br>0.0255 | 0.081,<br>-0.0094,<br>0.0288,<br>0.0257 | 0.080,<br>-0.0009,<br>0.0290,<br>0.0258 | 0.083,<br>0.0079,<br>0.0292,<br>0.026  | 0.083,<br>0.0251,<br>0.0310,<br>0.0263 | 0.203,<br>0.0436,<br>0.0324,<br>0.0265 | 0.871,<br>0.0923,<br>0.0343,<br>0.0273 |
| cML-MA-BIC         | 0.991,<br>-0.1004,<br>0.0229,<br>0.023  | 0.589,<br>-0.0504,<br>0.0232,<br>0.0234 | 0.252,<br>-0.0304,<br>0.0234,<br>0.0236 | 0.062,<br>-0.0105,<br>0.0235,<br>0.0239 | 0.050,<br>-0.0005,<br>0.0236,<br>0.024  | 0.068,<br>0.0095,<br>0.0238,<br>0.0241 | 0.222,<br>0.0294,<br>0.0240,<br>0.0246 | 0.531,<br>0.0493,<br>0.0243,<br>0.0246 | 0.976,<br>0.0993,<br>0.0251,<br>0.0254 |
| cML-MA-BIC-Profile | 0.991,<br>-0.1004,<br>0.0229,<br>0.0231 | 0.583,<br>-0.0504,<br>0.0232,<br>0.0235 | 0.248,<br>-0.0304,<br>0.0234,<br>0.0237 | 0.061,<br>-0.0105,<br>0.0235,<br>0.0239 | 0.049,<br>-0.0005,<br>0.0236,<br>0.0241 | 0.068,<br>0.0095,<br>0.0238,<br>0.0242 | 0.219,<br>0.0294,<br>0.0241,<br>0.0244 | 0.525,<br>0.0493,<br>0.0243,<br>0.0247 | 0.976,<br>0.0993,<br>0.0251,<br>0.0255 |
| cML-BIC            | 0.991,<br>-0.1005,<br>0.0229,<br>0.0227 | 0.608,<br>-0.0505,<br>0.0233,<br>0.0231 | 0.262,<br>-0.0305,<br>0.0235,<br>0.0233 | 0.073,<br>-0.0105,<br>0.0237,<br>0.0235 | 0.054,<br>-0.0005,<br>0.0238,<br>0.0236 | 0.072,<br>0.0095,<br>0.0239,<br>0.0238 | 0.235,<br>0.0295,<br>0.0242,<br>0.024  | 0.546,<br>0.0495,<br>0.0245,<br>0.0243 | 0.979,<br>0.0995,<br>0.0251,<br>0.025  |
| cML-BIC-Profile    | 0.991,<br>-0.1005,<br>0.0229,<br>0.0228 | 0.607,<br>-0.0505,<br>0.0233,<br>0.0232 | 0.260,<br>-0.0305,<br>0.0235,<br>0.0234 | 0.069,<br>-0.0105,<br>0.0237,<br>0.0236 | 0.053,<br>-0.0005,<br>0.0238,<br>0.0237 | 0.072,<br>0.0095,<br>0.0239,<br>0.0238 | 0.234,<br>0.0295,<br>0.0242,<br>0.0241 | 0.543,<br>0.0495,<br>0.0245,<br>0.0244 | 0.979,<br>0.0995,<br>0.0251,<br>0.0251 |
| MR-Mix             | 0.728,<br>-0.1007,<br>0.0461,<br>0.1046 | 0.405,<br>-0.0488,<br>0.0398,<br>0.0826 | 0.191,<br>-0.0291,<br>0.0381,<br>0.0675 | 0.063,<br>-0.0101,<br>0.0376,<br>0.0854 | 0.056,<br>-0.0004,<br>0.0372,<br>0.0551 | 0.070,<br>0.0089,<br>0.0370,<br>0.0592 | 0.165,<br>0.0274,<br>0.0376,<br>0.0715 | 0.358,<br>0.0456,<br>0.0392,<br>0.0901 | 0.710,<br>0.0888,<br>0.0448,<br>0.083  |
| MR-ContMix         | 0.938,<br>-0.1216,<br>0.0323,<br>NA     | 0.468,<br>-0.0689,<br>0.0391,<br>NA     | 0.210,<br>-0.0434,<br>0.0419,<br>NA     | 0.067,<br>-0.0151,<br>0.0455,<br>NA     | 0.045,<br>-0.0016,<br>0.0460,<br>NA     | 0.064,<br>0.0126,<br>0.0458,<br>NA     | 0.181,<br>0.0419,<br>0.0432,<br>NA     | 0.398,<br>0.0674,<br>0.0406,<br>NA     | 0.900,<br>1.1221,<br>0.0349,<br>NA     |
| MR-Lasso           | 0.975,<br>-0.0998,<br>0.0246,<br>0.0241 | 0.544,<br>-0.0504,<br>0.0251,<br>0.0246 | 0.244,<br>-0.0305,<br>0.0254,<br>0.0248 | 0.078,<br>-0.0105,<br>0.0260,<br>0.0251 | 0.056,<br>-0.0006,<br>0.0257,<br>0.0252 | 0.078,<br>0.0095,<br>0.0260,<br>0.0253 | 0.222,<br>0.0296,<br>0.0261,<br>0.0256 | 0.488,<br>0.0487,<br>0.0261,<br>0.0258 | 0.957,<br>0.0991,<br>0.0267,<br>0.0266 |
| MR-PRESSO          | 0.969,<br>-0.1001,<br>0.0230,<br>0.0217 | 0.511,<br>-0.0503,<br>0.0234,<br>0.0221 | 0.225,<br>-0.0304,<br>0.0236,<br>0.0223 | 0.075,<br>-0.0105,<br>0.0237,<br>0.0225 | 0.052,<br>-0.0005,<br>0.0239,<br>0.0226 | 0.067,<br>0.0094,<br>0.0240,<br>0.0227 | 0.200,<br>0.0292,<br>0.0243,<br>0.023  | 0.457,<br>0.0491,<br>0.0245,<br>0.0232 | 0.936,<br>0.0989,<br>0.0253,<br>0.0239 |
| MR-IVW             | 0.983,<br>-0.1001,<br>0.0226,<br>0.0244 | 0.531,<br>-0.0503,<br>0.0229,<br>0.0249 | 0.225,<br>-0.0304,<br>0.0231,<br>0.0251 | 0.047,<br>-0.0105,<br>0.0233,<br>0.0253 | 0.039,<br>-0.0005,<br>0.0234,<br>0.0255 | 0.056,<br>0.0094,<br>0.0235,<br>0.0256 | 0.195,<br>0.0293,<br>0.0238,<br>0.0258 | 0.488,<br>0.0492,<br>0.0240,<br>0.0261 | 0.966,<br>0.0990,<br>0.0247,<br>0.0269 |
| MR-IVW-Oracle      | 0.983,<br>-0.1001,<br>0.0226,<br>0.0244 | 0.531,<br>-0.0503,<br>0.0229,<br>0.0249 | 0.225,<br>-0.0304,<br>0.0231,<br>0.0251 | 0.047,<br>-0.0105,<br>0.0233,<br>0.0253 | 0.039,<br>-0.0005,<br>0.0234,<br>0.0255 | 0.056,<br>0.0094,<br>0.0235,<br>0.0256 | 0.195,<br>0.0293,<br>0.0238,<br>0.0258 | 0.488,<br>0.0492,<br>0.0240,<br>0.0261 | 0.966,<br>0.0990,<br>0.0247,<br>0.0269 |
| MR-Egger           | 0.106,<br>-0.0841,<br>0.1285,<br>0.1343 | 0.058,<br>-0.0403,<br>0.1307,<br>0.1372 | 0.047,<br>-0.0228,<br>0.1317,<br>0.1385 | 0.045,<br>-0.0052,<br>0.1328,<br>0.1398 | 0.039,<br>0.0035,<br>0.1335,<br>0.1405  | 0.043,<br>0.0123,<br>0.1341,<br>0.1413 | 0.043,<br>0.0299,<br>0.1354,<br>0.1427 | 0.049,<br>0.0474,<br>0.1368,<br>0.1443 | 0.082,<br>0.0912,<br>0.1407,<br>0.1484 |
| MR-Weighted-Median | 0.924,<br>-0.0992,<br>0.0265,<br>0.0304 | 0.374,<br>-0.0502,<br>0.0270,<br>0.0309 | 0.127,<br>-0.0307,<br>0.0273,<br>0.0312 | 0.029,<br>-0.0110,<br>0.0275,<br>0.0315 | 0.025,<br>-0.0012,<br>0.0276,<br>0.0316 | 0.027,<br>0.0086,<br>0.0277,<br>0.0318 | 0.114,<br>0.0282,<br>0.0280,<br>0.0321 | 0.298,<br>0.0478,<br>0.0284,<br>0.0324 | 0.851,<br>0.0969,<br>0.0293,<br>0.0334 |
| MR-Weighted-Mode   | 0.640,<br>-0.0992,<br>0.0355,<br>0.0448 | 0.142,<br>-0.0505,<br>0.0365,<br>0.0457 | 0.050,<br>-0.0312,<br>0.0369,<br>0.046  | 0.013,<br>-0.0115,<br>0.0373,<br>0.0465 | 0.007,<br>-0.0015,<br>0.0376,<br>0.0467 | 0.008,<br>0.0082,<br>0.0377,<br>0.0469 | 0.044,<br>0.0279,<br>0.0379,<br>0.0475 | 0.122,<br>0.0475,<br>0.0381,<br>0.048  | 0.519,<br>0.0964,<br>0.0392,<br>0.0494 |
| MR-RAPS1           | 0.988,<br>-0.1005,<br>0.0226,<br>0.024  | 0.557,<br>-0.0505,<br>0.0230,<br>0.0244 | 0.233,<br>-0.0305,<br>0.0232,<br>0.0247 | 0.053,<br>-0.0105,<br>0.0234,<br>0.0249 | 0.042,<br>-0.0005,<br>0.0235,<br>0.025  | 0.059,<br>0.0094,<br>0.0236,<br>0.0251 | 0.201,<br>0.0294,<br>0.0238,<br>0.0254 | 0.498,<br>0.0494,<br>0.0241,<br>0.0257 | 0.966,<br>0.0994,<br>0.0248,<br>0.0265 |
| MR-RAPS2           | 0.982,<br>0.2085,<br>4.1153,<br>0.0831  | 0.603,<br>0.3626,<br>4.1546,<br>0.0897  | 0.306,<br>-0.0550,<br>3.7213,<br>0.076  | 0.141,<br>0.3252,<br>3.3704,<br>0.0641  | 0.128,<br>0.3278,<br>3.3292,<br>0.0602  | 0.143,<br>0.1586,<br>2.9538,<br>0.0586 | 0.283,<br>0.2962,<br>4.1884,<br>0.0748 | 0.554,<br>0.0538,<br>4.9955,<br>0.0979 | 0.963,<br>0.2696,<br>4.5346,<br>1.1002 |
| MR-RAPS3           | 0.991,<br>-0.1006,<br>0.0227,<br>0.0227 | 0.607,<br>-0.0506,<br>0.0230,<br>0.0232 | 0.261,<br>-0.0306,<br>0.0232,<br>0.0234 | 0.070,<br>-0.0105,<br>0.0234,<br>0.0236 | 0.050,<br>-0.0005,<br>0.0235,<br>0.0237 | 0.068,<br>0.0095,<br>0.0236,<br>0.0238 | 0.232,<br>0.0295,<br>0.0239,<br>0.0241 | 0.545,<br>0.0495,<br>0.0241,<br>0.0243 | 0.981,<br>0.0995,<br>0.0248,<br>0.0251 |
| MR-RAPS4           | 0.987,<br>-0.1006,<br>0.0232,<br>0.0233 | 0.587,<br>-0.0506,<br>0.0236,<br>0.0238 | 0.250,<br>-0.0305,<br>0.0238,<br>0.024  | 0.058,<br>-0.0105,<br>0.0240,<br>0.0242 | 0.048,<br>-0.0005,<br>0.0241,<br>0.0243 | 0.067,<br>0.0095,<br>0.0242,<br>0.0244 | 0.217,<br>0.0295,<br>0.0245,<br>0.0247 | 0.513,<br>0.0495,<br>0.0247,<br>0.025  | 0.975,<br>0.0995,<br>0.0255,<br>0.0257 |



Table S27: Main simulations: in each cell, from top to bottom are empirical type-I error/power, mean( $\hat{\theta}$ ), SD( $\hat{\theta}$ ), mean(SE( $\hat{\theta}$ )) when  $m = 10$ , the ideal case of  $q = 0$ , and  $n = 100000$ .

| Methods \ $\theta$ | -0.1                                    | -0.05                                   | -0.03                                   | -0.01                                   | 0                                      | 0.01                                   | 0.03                                   | 0.05                                   | 0.1                                    |
|--------------------|-----------------------------------------|-----------------------------------------|-----------------------------------------|-----------------------------------------|----------------------------------------|----------------------------------------|----------------------------------------|----------------------------------------|----------------------------------------|
| cML-MA-AIC         | 0.963,<br>-0.0897,<br>0.0207,<br>0.0213 | 0.491,<br>-0.0404,<br>0.0200,<br>0.0213 | 0.173,<br>-0.0225,<br>0.0182,<br>0.021  | 0.023,<br>-0.0065,<br>0.0164,<br>0.0207 | 0.012,<br>0.0004,<br>0.0160,<br>0.0208 | 0.032,<br>0.0076,<br>0.0166,<br>0.0209 | 0.185,<br>0.0233,<br>0.0187,<br>0.0216 | 0.469,<br>0.0413,<br>0.0209,<br>0.0223 | 0.937,<br>0.0898,<br>0.0232,<br>0.0235 |
| cML-MA-AIC-Profile | 0.962,<br>-0.0899,<br>0.0208,<br>0.0213 | 0.490,<br>-0.0405,<br>0.0200,<br>0.0213 | 0.170,<br>-0.0225,<br>0.0182,<br>0.021  | 0.023,<br>-0.0065,<br>0.0164,<br>0.0208 | 0.012,<br>0.0004,<br>0.0161,<br>0.0208 | 0.032,<br>0.0076,<br>0.0166,<br>0.021  | 0.184,<br>0.0234,<br>0.0187,<br>0.0217 | 0.469,<br>0.0413,<br>0.0210,<br>0.0224 | 0.936,<br>0.0899,<br>0.0232,<br>0.0235 |
| cML-AIC            | 0.986,<br>-0.0947,<br>0.0221,<br>0.0173 | 0.688,<br>-0.0446,<br>0.0224,<br>0.0177 | 0.349,<br>-0.0255,<br>0.0215,<br>0.0179 | 0.103,<br>-0.0071,<br>0.0206,<br>0.0181 | 0.079,<br>0.0007,<br>0.0206,<br>0.0182 | 0.120,<br>0.0089,<br>0.0210,<br>0.0183 | 0.356,<br>0.0263,<br>0.0222,<br>0.0185 | 0.664,<br>0.0455,<br>0.0237,<br>0.0187 | 0.976,<br>0.0950,<br>0.0252,<br>0.0192 |
| cML-AIC-Profile    | 0.986,<br>-0.0948,<br>0.0222,<br>0.0174 | 0.684,<br>-0.0446,<br>0.0224,<br>0.0178 | 0.350,<br>-0.0255,<br>0.0215,<br>0.0179 | 0.102,<br>-0.0071,<br>0.0208,<br>0.0182 | 0.079,<br>0.0007,<br>0.0206,<br>0.0183 | 0.118,<br>0.0089,<br>0.0210,<br>0.0183 | 0.355,<br>0.0264,<br>0.0222,<br>0.0185 | 0.664,<br>0.0456,<br>0.0237,<br>0.0187 | 0.975,<br>0.0951,<br>0.0252,<br>0.0193 |
| cML-MA-BIC         | 1.000,<br>-0.0997,<br>0.0158,<br>0.0161 | 0.857,<br>-0.0496,<br>0.0161,<br>0.0165 | 0.425,<br>-0.0296,<br>0.0162,<br>0.0166 | 0.074,<br>-0.0096,<br>0.0163,<br>0.0168 | 0.047,<br>0.0004,<br>0.0164,<br>0.0168 | 0.096,<br>0.0104,<br>0.0165,<br>0.0169 | 0.429,<br>0.0304,<br>0.0167,<br>0.0171 | 0.834,<br>0.0504,<br>0.0169,<br>0.0173 | 1.000,<br>1.0005,<br>0.0174,<br>0.0178 |
| cML-MA-BIC-Profile | 1.000,<br>-0.0997,<br>0.0158,<br>0.0162 | 0.856,<br>-0.0496,<br>0.0161,<br>0.0165 | 0.422,<br>-0.0296,<br>0.0162,<br>0.0166 | 0.074,<br>-0.0096,<br>0.0164,<br>0.0169 | 0.047,<br>0.0004,<br>0.0164,<br>0.0169 | 0.095,<br>0.0104,<br>0.0165,<br>0.017  | 0.427,<br>0.0304,<br>0.0167,<br>0.0171 | 0.834,<br>0.0504,<br>0.0169,<br>0.0173 | 1.000,<br>1.0005,<br>0.0174,<br>0.0179 |
| cML-BIC            | 1.000,<br>-0.0998,<br>0.0158,<br>0.016  | 0.863,<br>-0.0497,<br>0.0161,<br>0.0163 | 0.436,<br>-0.0297,<br>0.0162,<br>0.0164 | 0.077,<br>-0.0097,<br>0.0164,<br>0.0166 | 0.052,<br>0.0004,<br>0.0165,<br>0.0167 | 0.098,<br>0.0104,<br>0.0166,<br>0.0167 | 0.444,<br>0.0304,<br>0.0168,<br>0.0169 | 0.843,<br>0.0504,<br>0.0169,<br>0.0171 | 1.000,<br>1.0005,<br>0.0175,<br>0.0176 |
| cML-BIC-Profile    | 1.000,<br>-0.0998,<br>0.0158,<br>0.016  | 0.863,<br>-0.0497,<br>0.0161,<br>0.0163 | 0.436,<br>-0.0297,<br>0.0162,<br>0.0165 | 0.077,<br>-0.0097,<br>0.0164,<br>0.0166 | 0.052,<br>0.0004,<br>0.0165,<br>0.0167 | 0.096,<br>0.0104,<br>0.0166,<br>0.0168 | 0.444,<br>0.0304,<br>0.0168,<br>0.017  | 0.843,<br>0.0504,<br>0.0169,<br>0.0171 | 1.000,<br>1.0005,<br>0.0175,<br>0.0177 |
| MR-Mix             | 0.784,<br>-0.0965,<br>0.0400,<br>0.0397 | 0.562,<br>-0.0466,<br>0.0298,<br>0.0788 | 0.268,<br>-0.0271,<br>0.0277,<br>0.0689 | 0.071,<br>-0.0086,<br>0.0267,<br>0.0939 | 0.062,<br>0.0007,<br>0.0266,<br>0.1207 | 0.096,<br>0.0101,<br>0.0268,<br>0.05   | 0.294,<br>0.0282,<br>0.0278,<br>0.0602 | 0.555,<br>0.0461,<br>0.0297,<br>0.1415 | 0.780,<br>0.0886,<br>0.0387,<br>0.0599 |
| MR-ContMix         | 1.000,<br>-0.1137,<br>0.0202,<br>NA     | 0.703,<br>-0.0644,<br>0.0248,<br>NA     | 0.321,<br>-0.0404,<br>0.0284,<br>NA     | 0.070,<br>-0.0138,<br>0.0314,<br>NA     | 0.051,<br>0.0010,<br>0.0321,<br>NA     | 0.093,<br>0.0152,<br>0.0319,<br>NA     | 0.333,<br>0.0423,<br>0.0293,<br>NA     | 0.680,<br>0.0658,<br>0.0261,<br>NA     | 0.994,<br>1.1163,<br>0.0217,<br>NA     |
| MR-Lasso           | 1.000,<br>-0.0994,<br>0.0171,<br>0.017  | 0.795,<br>-0.0493,<br>0.0171,<br>0.0174 | 0.394,<br>-0.0296,<br>0.0175,<br>0.0176 | 0.080,<br>-0.0093,<br>0.0179,<br>0.0178 | 0.050,<br>0.0005,<br>0.0176,<br>0.0178 | 0.092,<br>0.0103,<br>0.0178,<br>0.0179 | 0.403,<br>0.0303,<br>0.0179,<br>0.0181 | 0.783,<br>0.0505,<br>0.0183,<br>0.0183 | 1.000,<br>1.0003,<br>0.0187,<br>0.0188 |
| MR-PRESSO          | 1.000,<br>-0.0996,<br>0.0160,<br>0.0154 | 0.781,<br>-0.0496,<br>0.0162,<br>0.0157 | 0.374,<br>-0.0296,<br>0.0164,<br>0.0159 | 0.077,<br>-0.0096,<br>0.0165,<br>0.016  | 0.056,<br>0.0003,<br>0.0166,<br>0.0161 | 0.092,<br>0.0103,<br>0.0167,<br>0.0162 | 0.351,<br>0.0303,<br>0.0169,<br>0.0163 | 0.746,<br>0.0503,<br>0.0170,<br>0.0165 | 0.999,<br>1.0003,<br>0.0175,<br>0.017  |
| MR-IVW             | 1.000,<br>-0.0995,<br>0.0158,<br>0.0172 | 0.818,<br>-0.0496,<br>0.0160,<br>0.0175 | 0.371,<br>-0.0296,<br>0.0161,<br>0.0177 | 0.055,<br>-0.0096,<br>0.0163,<br>0.0179 | 0.041,<br>0.0004,<br>0.0164,<br>0.0179 | 0.077,<br>0.0104,<br>0.0164,<br>0.018  | 0.382,<br>0.0304,<br>0.0166,<br>0.0182 | 0.795,<br>0.0504,<br>0.0168,<br>0.0184 | 1.000,<br>1.0004,<br>0.0173,<br>0.019  |
| MR-IVW-Oracle      | 1.000,<br>-0.0995,<br>0.0158,<br>0.0172 | 0.818,<br>-0.0496,<br>0.0160,<br>0.0175 | 0.371,<br>-0.0296,<br>0.0161,<br>0.0177 | 0.055,<br>-0.0096,<br>0.0163,<br>0.0179 | 0.041,<br>0.0004,<br>0.0164,<br>0.0179 | 0.077,<br>0.0104,<br>0.0164,<br>0.018  | 0.382,<br>0.0304,<br>0.0166,<br>0.0182 | 0.795,<br>0.0504,<br>0.0168,<br>0.0184 | 1.000,<br>1.0004,<br>0.0173,<br>0.019  |
| MR-Egger           | 0.161,<br>-0.0938,<br>0.0886,<br>0.0965 | 0.079,<br>-0.0469,<br>0.0900,<br>0.0986 | 0.050,<br>-0.0282,<br>0.0907,<br>0.0995 | 0.035,<br>-0.0094,<br>0.0914,<br>0.1005 | 0.032,<br>0.0000,<br>0.0918,<br>0.101  | 0.029,<br>0.0093,<br>0.0922,<br>0.1015 | 0.034,<br>0.0281,<br>0.0931,<br>0.1026 | 0.059,<br>0.0469,<br>0.0940,<br>0.1038 | 0.142,<br>0.0938,<br>0.0967,<br>0.1068 |
| MR-Weighted-Median | 0.999,<br>-0.0991,<br>0.0187,<br>0.0214 | 0.627,<br>-0.0495,<br>0.0191,<br>0.0218 | 0.246,<br>-0.0297,<br>0.0192,<br>0.022  | 0.041,<br>-0.0098,<br>0.0194,<br>0.0222 | 0.028,<br>0.0002,<br>0.0195,<br>0.0223 | 0.040,<br>0.0101,<br>0.0196,<br>0.0224 | 0.252,<br>0.0300,<br>0.0199,<br>0.0226 | 0.602,<br>0.0499,<br>0.0201,<br>0.0229 | 0.993,<br>0.0996,<br>0.0206,<br>0.0236 |
| MR-Weighted-Mode   | 0.912,<br>-0.0986,<br>0.0251,<br>0.0317 | 0.316,<br>-0.0489,<br>0.0254,<br>0.0323 | 0.090,<br>-0.0290,<br>0.0256,<br>0.0326 | 0.011,<br>-0.0091,<br>0.0259,<br>0.0329 | 0.006,<br>0.0008,<br>0.0261,<br>0.0331 | 0.012,<br>0.0107,<br>0.0262,<br>0.0332 | 0.097,<br>0.0303,<br>0.0266,<br>0.0336 | 0.327,<br>0.0502,<br>0.0270,<br>0.034  | 0.854,<br>0.0997,<br>0.0280,<br>0.035  |
| MR-RAPS1           | 1.000,<br>-0.0998,<br>0.0158,<br>0.0169 | 0.834,<br>-0.0497,<br>0.0161,<br>0.0172 | 0.392,<br>-0.0297,<br>0.0162,<br>0.0173 | 0.061,<br>-0.0096,<br>0.0163,<br>0.0175 | 0.041,<br>0.0004,<br>0.0164,<br>0.0176 | 0.082,<br>0.0104,<br>0.0165,<br>0.0177 | 0.403,<br>0.0304,<br>0.0166,<br>0.0178 | 0.816,<br>0.0505,<br>0.0168,<br>0.018  | 1.000,<br>1.0006,<br>0.0173,<br>0.0186 |
| MR-RAPS2           | 1.000,<br>0.1027,<br>1.0726,<br>0.0351  | 0.853,<br>-0.0015,<br>2.4214,<br>0.0583 | 0.492,<br>0.1487,<br>2.5566,<br>0.0549  | 0.184,<br>0.1367,<br>2.4835,<br>0.049   | 0.131,<br>0.1945,<br>2.1665,<br>0.0422 | 0.176,<br>0.1989,<br>2.4643,<br>0.0461 | 0.470,<br>0.3043,<br>2.6780,<br>0.0576 | 0.829,<br>0.1506,<br>2.5923,<br>0.0593 | 0.999,<br>0.2744,<br>1.5985,<br>0.0441 |
| MR-RAPS3           | 1.000,<br>-0.0998,<br>0.0158,<br>0.016  | 0.864,<br>-0.0497,<br>0.0161,<br>0.0163 | 0.435,<br>-0.0296,<br>0.0162,<br>0.0164 | 0.075,<br>-0.0096,<br>0.0163,<br>0.0166 | 0.050,<br>0.0004,<br>0.0164,<br>0.0167 | 0.096,<br>0.0104,<br>0.0165,<br>0.0168 | 0.445,<br>0.0305,<br>0.0166,<br>0.0169 | 0.844,<br>0.0505,<br>0.0168,<br>0.0171 | 1.000,<br>1.0006,<br>0.0173,<br>0.0177 |
| MR-RAPS4           | 1.000,<br>-0.0997,<br>0.0161,<br>0.0164 | 0.845,<br>-0.0496,<br>0.0164,<br>0.0167 | 0.425,<br>-0.0296,<br>0.0165,<br>0.0169 | 0.070,<br>-0.0095,<br>0.0166,<br>0.017  | 0.042,<br>0.0005,<br>0.0167,<br>0.0171 | 0.101,<br>0.0105,<br>0.0168,<br>0.0172 | 0.426,<br>0.0305,<br>0.0170,<br>0.0174 | 0.824,<br>0.0506,<br>0.0172,<br>0.0176 | 1.000,<br>1.0007,<br>0.0177,<br>0.0181 |

Table S28: Main simulations: in each cell, from top to bottom are empirical type-I error/power, mean( $\hat{\theta}$ ), SD( $\hat{\theta}$ ), mean(SE( $\hat{\theta}$ )) when  $m = 10$ , the ideal case of  $q = 0$ , and  $n = 200000$ .

| Methods \ $\theta$ | -0.1                                    | -0.05                                   | -0.03                                   | -0.01                                   | 0                                       | 0.01                                   | 0.03                                   | 0.05                                   | 0.1                                    |
|--------------------|-----------------------------------------|-----------------------------------------|-----------------------------------------|-----------------------------------------|-----------------------------------------|----------------------------------------|----------------------------------------|----------------------------------------|----------------------------------------|
| cML-MA-AIC         | 0.999,<br>-0.0942,<br>0.0147,<br>0.015  | 0.809,<br>-0.0443,<br>0.0148,<br>0.0152 | 0.402,<br>-0.0252,<br>0.0139,<br>0.015  | 0.053,<br>-0.0082,<br>0.0120,<br>0.0146 | 0.020,<br>-0.0008,<br>0.0116,<br>0.0147 | 0.045,<br>0.0065,<br>0.0119,<br>0.0148 | 0.338,<br>0.0232,<br>0.0138,<br>0.0154 | 0.739,<br>0.0420,<br>0.0152,<br>0.016  | 0.990,<br>0.0915,<br>0.0163,<br>0.0166 |
| cML-MA-AIC-Profile | 0.999,<br>-0.0944,<br>0.0148,<br>0.0151 | 0.809,<br>-0.0443,<br>0.0148,<br>0.0152 | 0.402,<br>-0.0252,<br>0.0139,<br>0.015  | 0.053,<br>-0.0082,<br>0.0120,<br>0.0147 | 0.020,<br>-0.0008,<br>0.0116,<br>0.0147 | 0.045,<br>0.0065,<br>0.0119,<br>0.0148 | 0.337,<br>0.0232,<br>0.0138,<br>0.0155 | 0.739,<br>0.0420,<br>0.0152,<br>0.016  | 0.990,<br>0.0916,<br>0.0163,<br>0.0166 |
| cML-AIC            | 1.000,<br>-0.0978,<br>0.0156,<br>0.0123 | 0.925,<br>-0.0478,<br>0.0159,<br>0.0125 | 0.600,<br>-0.0282,<br>0.0156,<br>0.0126 | 0.146,<br>-0.0095,<br>0.0146,<br>0.0127 | 0.071,<br>-0.0009,<br>0.0145,<br>0.0128 | 0.127,<br>0.0076,<br>0.0147,<br>0.0129 | 0.536,<br>0.0260,<br>0.0156,<br>0.013  | 0.876,<br>0.0453,<br>0.0167,<br>0.0131 | 0.996,<br>0.0952,<br>0.0175,<br>0.0135 |
| cML-AIC-Profile    | 1.000,<br>-0.0980,<br>0.0156,<br>0.0123 | 0.925,<br>-0.0478,<br>0.0159,<br>0.0125 | 0.601,<br>-0.0282,<br>0.0156,<br>0.0126 | 0.147,<br>-0.0096,<br>0.0146,<br>0.0128 | 0.071,<br>-0.0009,<br>0.0145,<br>0.0128 | 0.126,<br>0.0076,<br>0.0147,<br>0.0129 | 0.535,<br>0.0260,<br>0.0156,<br>0.013  | 0.877,<br>0.0453,<br>0.0167,<br>0.0131 | 0.996,<br>0.0953,<br>0.0175,<br>0.0135 |
| cML-MA-BIC         | 1.000,<br>-0.1004,<br>0.0111,<br>0.0114 | 0.991,<br>-0.0504,<br>0.0114,<br>0.0116 | 0.738,<br>-0.0304,<br>0.0115,<br>0.0117 | 0.132,<br>-0.0104,<br>0.0116,<br>0.0118 | 0.053,<br>-0.0004,<br>0.0116,<br>0.0119 | 0.120,<br>0.0096,<br>0.0117,<br>0.0119 | 0.692,<br>0.0296,<br>0.0119,<br>0.0121 | 0.986,<br>0.0496,<br>0.0120,<br>0.0122 | 1.000,<br>0.0996,<br>0.0124,<br>0.0126 |
| cML-MA-BIC-Profile | 1.000,<br>-0.1004,<br>0.0111,<br>0.0114 | 0.991,<br>-0.0504,<br>0.0114,<br>0.0116 | 0.738,<br>-0.0304,<br>0.0115,<br>0.0117 | 0.132,<br>-0.0104,<br>0.0116,<br>0.0118 | 0.053,<br>-0.0004,<br>0.0116,<br>0.0119 | 0.120,<br>0.0096,<br>0.0117,<br>0.0119 | 0.691,<br>0.0296,<br>0.0119,<br>0.0121 | 0.986,<br>0.0496,<br>0.0120,<br>0.0122 | 1.000,<br>0.0996,<br>0.0124,<br>0.0126 |
| cML-BIC            | 1.000,<br>-0.1004,<br>0.0112,<br>0.0113 | 0.991,<br>-0.0504,<br>0.0114,<br>0.0115 | 0.747,<br>-0.0304,<br>0.0115,<br>0.0116 | 0.138,<br>-0.0104,<br>0.0116,<br>0.0117 | 0.056,<br>-0.0004,<br>0.0117,<br>0.0118 | 0.127,<br>0.0096,<br>0.0118,<br>0.0118 | 0.700,<br>0.0296,<br>0.0119,<br>0.012  | 0.986,<br>0.0496,<br>0.0120,<br>0.0121 | 1.000,<br>0.0997,<br>0.0124,<br>0.0125 |
| cML-BIC-Profile    | 1.000,<br>-0.1004,<br>0.0112,<br>0.0113 | 0.991,<br>-0.0504,<br>0.0114,<br>0.0115 | 0.746,<br>-0.0304,<br>0.0115,<br>0.0116 | 0.138,<br>-0.0104,<br>0.0116,<br>0.0117 | 0.056,<br>-0.0004,<br>0.0117,<br>0.0118 | 0.126,<br>0.0096,<br>0.0118,<br>0.0118 | 0.699,<br>0.0296,<br>0.0119,<br>0.012  | 0.986,<br>0.0496,<br>0.0120,<br>0.0121 | 1.000,<br>0.0997,<br>0.0124,<br>0.0125 |
| MR-Mix             | 0.843,<br>-0.0985,<br>0.0333,<br>0.0504 | 0.734,<br>-0.0484,<br>0.0222,<br>0.0459 | 0.528,<br>-0.0293,<br>0.0188,<br>0.0576 | 0.103,<br>-0.0102,<br>0.0168,<br>0.0535 | 0.050,<br>-0.0008,<br>0.0167,<br>0.0485 | 0.094,<br>0.0085,<br>0.0167,<br>0.0696 | 0.464,<br>0.0267,<br>0.0187,<br>0.0701 | 0.712,<br>0.0447,<br>0.0217,<br>0.0583 | 0.836,<br>0.0889,<br>0.0303,<br>0.0313 |
| MR-ContMix         | 1.000,<br>-0.1081,<br>0.0137,<br>NA     | 0.955,<br>-0.0617,<br>0.0156,<br>NA     | 0.606,<br>-0.0410,<br>0.0179,<br>NA     | 0.128,<br>-0.0159,<br>0.0210,<br>NA     | 0.051,<br>-0.0010,<br>0.0219,<br>NA     | 0.107,<br>0.0133,<br>0.0217,<br>NA     | 0.527,<br>0.0392,<br>0.0192,<br>NA     | 0.911,<br>0.0605,<br>0.0169,<br>NA     | 1.000,<br>0.1080,<br>0.0150,<br>NA     |
| MR-Lasso           | 1.000,<br>-0.1004,<br>0.0120,<br>0.012  | 0.982,<br>-0.0506,<br>0.0122,<br>0.0123 | 0.690,<br>-0.0306,<br>0.0124,<br>0.0124 | 0.136,<br>-0.0105,<br>0.0125,<br>0.0125 | 0.049,<br>-0.0006,<br>0.0124,<br>0.0126 | 0.115,<br>0.0094,<br>0.0126,<br>0.0126 | 0.642,<br>0.0294,<br>0.0129,<br>0.0128 | 0.964,<br>0.0494,<br>0.0128,<br>0.0129 | 1.000,<br>0.0994,<br>0.0133,<br>0.0132 |
| MR-PRESSO          | 1.000,<br>-0.1004,<br>0.0112,<br>0.0108 | 0.973,<br>-0.0504,<br>0.0115,<br>0.011  | 0.679,<br>-0.0304,<br>0.0116,<br>0.0111 | 0.132,<br>-0.0105,<br>0.0117,<br>0.0112 | 0.048,<br>-0.0005,<br>0.0118,<br>0.0112 | 0.113,<br>0.0095,<br>0.0118,<br>0.0113 | 0.616,<br>0.0295,<br>0.0120,<br>0.0114 | 0.951,<br>0.0495,<br>0.0121,<br>0.0116 | 1.000,<br>0.0995,<br>0.0125,<br>0.0119 |
| MR-IVW             | 1.000,<br>-0.1003,<br>0.0112,<br>0.0121 | 0.986,<br>-0.0504,<br>0.0114,<br>0.0124 | 0.696,<br>-0.0304,<br>0.0115,<br>0.0125 | 0.120,<br>-0.0104,<br>0.0116,<br>0.0126 | 0.042,<br>-0.0004,<br>0.0117,<br>0.0127 | 0.100,<br>0.0095,<br>0.0117,<br>0.0127 | 0.651,<br>0.0295,<br>0.0119,<br>0.0129 | 0.969,<br>0.0495,<br>0.0120,<br>0.013  | 1.000,<br>0.0995,<br>0.0124,<br>0.0134 |
| MR-IVW-Oracle      | 1.000,<br>-0.1003,<br>0.0112,<br>0.0121 | 0.986,<br>-0.0504,<br>0.0114,<br>0.0124 | 0.696,<br>-0.0304,<br>0.0115,<br>0.0125 | 0.120,<br>-0.0104,<br>0.0116,<br>0.0126 | 0.042,<br>-0.0004,<br>0.0117,<br>0.0127 | 0.100,<br>0.0095,<br>0.0117,<br>0.0127 | 0.651,<br>0.0295,<br>0.0119,<br>0.0129 | 0.969,<br>0.0495,<br>0.0120,<br>0.013  | 1.000,<br>0.0995,<br>0.0124,<br>0.0134 |
| MR-Egger           | 0.283,<br>-0.0936,<br>0.0641,<br>0.0691 | 0.091,<br>-0.0455,<br>0.0653,<br>0.0705 | 0.061,<br>-0.0263,<br>0.0658,<br>0.0711 | 0.039,<br>-0.0070,<br>0.0664,<br>0.0718 | 0.039,<br>0.0026,<br>0.0668,<br>0.0721  | 0.041,<br>0.0122,<br>0.0671,<br>0.0725 | 0.058,<br>0.0314,<br>0.0678,<br>0.0732 | 0.085,<br>0.0507,<br>0.0686,<br>0.074  | 0.257,<br>0.0988,<br>0.0706,<br>0.0761 |
| MR-Weighted-Median | 1.000,<br>-0.1004,<br>0.0134,<br>0.0151 | 0.918,<br>-0.0506,<br>0.0137,<br>0.0154 | 0.516,<br>-0.0307,<br>0.0138,<br>0.0155 | 0.065,<br>-0.0108,<br>0.0139,<br>0.0157 | 0.029,<br>-0.0008,<br>0.0140,<br>0.0157 | 0.058,<br>0.0091,<br>0.0140,<br>0.0158 | 0.442,<br>0.0290,<br>0.0142,<br>0.016  | 0.883,<br>0.0488,<br>0.0143,<br>0.0162 | 1.000,<br>0.0985,<br>0.0148,<br>0.0166 |
| MR-Weighted-Mode   | 0.995,<br>-0.1006,<br>0.0176,<br>0.0225 | 0.662,<br>-0.0509,<br>0.0181,<br>0.0229 | 0.229,<br>-0.0311,<br>0.0184,<br>0.0231 | 0.032,<br>-0.0112,<br>0.0186,<br>0.0233 | 0.013,<br>-0.0013,<br>0.0187,<br>0.0235 | 0.025,<br>0.0086,<br>0.0188,<br>0.0236 | 0.184,<br>0.0284,<br>0.0190,<br>0.0238 | 0.564,<br>0.0483,<br>0.0192,<br>0.0241 | 0.979,<br>0.0976,<br>0.0197,<br>0.0249 |
| MR-RAPS1           | 1.000,<br>-0.1005,<br>0.0112,<br>0.0119 | 0.988,<br>-0.0504,<br>0.0114,<br>0.0121 | 0.706,<br>-0.0304,<br>0.0115,<br>0.0122 | 0.124,<br>-0.0104,<br>0.0116,<br>0.0124 | 0.048,<br>-0.0004,<br>0.0117,<br>0.0124 | 0.106,<br>0.0096,<br>0.0117,<br>0.0125 | 0.670,<br>0.0296,<br>0.0119,<br>0.0126 | 0.974,<br>0.0496,<br>0.0120,<br>0.0127 | 1.000,<br>0.0996,<br>0.0124,<br>0.0131 |
| MR-RAPS2           | 1.000,<br>-0.1055,<br>0.3022,<br>0.0151 | 0.984,<br>0.0743,<br>1.0341,<br>0.0308  | 0.753,<br>0.0333,<br>1.4742,<br>0.0393  | 0.239,<br>0.1931,<br>2.2589,<br>0.0358  | 0.151,<br>0.0831,<br>1.8815,<br>0.0335  | 0.213,<br>0.1960,<br>2.0820,<br>0.0336 | 0.714,<br>0.1130,<br>1.8206,<br>0.0418 | 0.971,<br>0.1235,<br>1.1682,<br>0.0342 | 1.000,<br>0.1630,<br>0.4813,<br>0.0201 |
| MR-RAPS3           | 1.000,<br>-0.1005,<br>0.0112,<br>0.0113 | 0.992,<br>-0.0505,<br>0.0114,<br>0.0115 | 0.746,<br>-0.0305,<br>0.0115,<br>0.0116 | 0.140,<br>-0.0105,<br>0.0116,<br>0.0117 | 0.055,<br>-0.0004,<br>0.0117,<br>0.0118 | 0.124,<br>0.0096,<br>0.0117,<br>0.0118 | 0.699,<br>0.0296,<br>0.0119,<br>0.012  | 0.986,<br>0.0496,<br>0.0120,<br>0.0121 | 1.000,<br>0.0996,<br>0.0124,<br>0.0125 |
| MR-RAPS4           | 1.000,<br>-0.1006,<br>0.0113,<br>0.0116 | 0.992,<br>-0.0505,<br>0.0115,<br>0.0118 | 0.726,<br>-0.0280,<br>0.0582,<br>0.0119 | 0.132,<br>-0.0103,<br>0.0130,<br>0.012  | 0.053,<br>-0.0005,<br>0.0118,<br>0.0121 | 0.118,<br>0.0099,<br>0.0158,<br>0.0122 | 0.683,<br>0.0299,<br>0.0145,<br>0.0123 | 0.978,<br>0.0504,<br>0.0240,<br>0.0124 | 1.000,<br>0.0995,<br>0.0126,<br>0.0128 |

Table S29: Main simulations: in each cell, from top to bottom are empirical type-I error/power, mean( $\hat{\theta}$ ), SD( $\hat{\theta}$ ), mean(SE( $\hat{\theta}$ )) when  $m = 10$ , the InSIDE satisfied,  $q = 0.2$ , and  $n = 50000$ .

| Methods \ $\theta$ | -0.1                                    | -0.05                                   | -0.03                                   | -0.01                                   | 0                                       | 0.01                                   | 0.03                                   | 0.05                                   | 0.1                                    |
|--------------------|-----------------------------------------|-----------------------------------------|-----------------------------------------|-----------------------------------------|-----------------------------------------|----------------------------------------|----------------------------------------|----------------------------------------|----------------------------------------|
| cML-MA-AIC         | 0.680,<br>-0.0831,<br>0.0338,<br>0.0347 | 0.204,<br>-0.0371,<br>0.0304,<br>0.0341 | 0.072,<br>-0.0216,<br>0.0277,<br>0.0338 | 0.020,<br>-0.0075,<br>0.0261,<br>0.0338 | 0.022,<br>-0.0004,<br>0.0259,<br>0.0339 | 0.023,<br>0.0065,<br>0.0261,<br>0.034  | 0.065,<br>0.0207,<br>0.0278,<br>0.0348 | 0.164,<br>0.0368,<br>0.0303,<br>0.0356 | 0.607,<br>0.0818,<br>0.0357,<br>0.0379 |
| cML-MA-AIC-Profile | 0.670,<br>-0.0833,<br>0.0338,<br>0.0349 | 0.199,<br>-0.0372,<br>0.0305,<br>0.0343 | 0.070,<br>-0.0216,<br>0.0278,<br>0.034  | 0.020,<br>-0.0075,<br>0.0261,<br>0.034  | 0.021,<br>-0.0004,<br>0.0259,<br>0.0341 | 0.023,<br>0.0065,<br>0.0261,<br>0.0342 | 0.063,<br>0.0207,<br>0.0278,<br>0.035  | 0.163,<br>0.0368,<br>0.0303,<br>0.0358 | 0.604,<br>0.0820,<br>0.0358,<br>0.0381 |
| cML-AIC            | 0.828,<br>-0.0908,<br>0.0381,<br>0.028  | 0.380,<br>-0.0428,<br>0.0360,<br>0.0284 | 0.205,<br>-0.0250,<br>0.0344,<br>0.0288 | 0.090,<br>-0.0083,<br>0.0333,<br>0.029  | 0.073,<br>-0.0004,<br>0.0332,<br>0.0292 | 0.098,<br>0.0082,<br>0.0334,<br>0.0293 | 0.175,<br>0.0245,<br>0.0349,<br>0.0296 | 0.355,<br>0.0426,<br>0.0366,<br>0.03   | 0.772,<br>0.0903,<br>0.0409,<br>0.0307 |
| cML-AIC-Profile    | 0.827,<br>-0.0911,<br>0.0381,<br>0.0282 | 0.375,<br>-0.0428,<br>0.0360,<br>0.0286 | 0.201,<br>-0.0251,<br>0.0345,<br>0.029  | 0.089,<br>-0.0084,<br>0.0333,<br>0.0292 | 0.072,<br>-0.0004,<br>0.0332,<br>0.0294 | 0.095,<br>0.0082,<br>0.0334,<br>0.0295 | 0.174,<br>0.0245,<br>0.0349,<br>0.0298 | 0.354,<br>0.0426,<br>0.0366,<br>0.0301 | 0.772,<br>0.0904,<br>0.0410,<br>0.0309 |
| cML-MA-BIC         | 0.969,<br>-0.1001,<br>0.0262,<br>0.0261 | 0.475,<br>-0.0501,<br>0.0266,<br>0.0266 | 0.214,<br>-0.0302,<br>0.0268,<br>0.0268 | 0.068,<br>-0.0102,<br>0.0270,<br>0.0271 | 0.051,<br>-0.0003,<br>0.0271,<br>0.0272 | 0.061,<br>0.0097,<br>0.0273,<br>0.0273 | 0.197,<br>0.0296,<br>0.0276,<br>0.0276 | 0.441,<br>0.0495,<br>0.0280,<br>0.0279 | 0.937,<br>0.0995,<br>0.0289,<br>0.0287 |
| cML-MA-BIC-Profile | 0.969,<br>-0.1001,<br>0.0262,<br>0.0262 | 0.472,<br>-0.0501,<br>0.0266,<br>0.0267 | 0.211,<br>-0.0302,<br>0.0268,<br>0.0269 | 0.068,<br>-0.0102,<br>0.0270,<br>0.0272 | 0.050,<br>-0.0003,<br>0.0271,<br>0.0273 | 0.059,<br>0.0097,<br>0.0273,<br>0.0274 | 0.196,<br>0.0296,<br>0.0276,<br>0.0277 | 0.439,<br>0.0495,<br>0.0280,<br>0.028  | 0.933,<br>0.0995,<br>0.0289,<br>0.0289 |
| cML-BIC            | 0.973,<br>-0.1002,<br>0.0260,<br>0.0258 | 0.487,<br>-0.0503,<br>0.0266,<br>0.0262 | 0.219,<br>-0.0303,<br>0.0268,<br>0.0264 | 0.074,<br>-0.0103,<br>0.0271,<br>0.0267 | 0.055,<br>-0.0003,<br>0.0272,<br>0.0268 | 0.065,<br>0.0097,<br>0.0274,<br>0.027  | 0.203,<br>0.0298,<br>0.0276,<br>0.0272 | 0.447,<br>0.0498,<br>0.0280,<br>0.0275 | 0.942,<br>0.0997,<br>0.0289,<br>0.0284 |
| cML-BIC-Profile    | 0.972,<br>-0.1002,<br>0.0260,<br>0.0259 | 0.483,<br>-0.0503,<br>0.0266,<br>0.0263 | 0.216,<br>-0.0303,<br>0.0268,<br>0.0265 | 0.072,<br>-0.0103,<br>0.0271,<br>0.0268 | 0.054,<br>-0.0003,<br>0.0272,<br>0.0269 | 0.062,<br>0.0097,<br>0.0274,<br>0.0271 | 0.201,<br>0.0298,<br>0.0276,<br>0.0273 | 0.448,<br>0.0498,<br>0.0280,<br>0.0276 | 0.941,<br>0.0997,<br>0.0289,<br>0.0285 |
| MR-Mix             | 0.870,<br>-0.1053,<br>0.0296,<br>0.0358 | 0.280,<br>-0.0515,<br>0.0296,<br>0.0357 | 0.110,<br>-0.0308,<br>0.0294,<br>0.0356 | 0.035,<br>-0.0104,<br>0.0294,<br>0.0356 | 0.023,<br>-0.0002,<br>0.0294,<br>0.0356 | 0.032,<br>0.0098,<br>0.0295,<br>0.0357 | 0.099,<br>0.0295,<br>0.0294,<br>0.0357 | 0.265,<br>0.0488,<br>0.0295,<br>0.036  | 0.799,<br>0.0952,<br>0.0296,<br>0.036  |
| MR-ContMix         | 0.954,<br>-0.1002,<br>0.0282,<br>NA     | 0.481,<br>-0.0503,<br>0.0288,<br>NA     | 0.227,<br>-0.0304,<br>0.0290,<br>NA     | 0.076,<br>-0.0104,<br>0.0294,<br>NA     | 0.060,<br>-0.0005,<br>0.0296,<br>NA     | 0.080,<br>0.0094,<br>0.0298,<br>NA     | 0.210,<br>0.0294,<br>0.0301,<br>NA     | 0.446,<br>0.0493,<br>0.0305,<br>NA     | 0.904,<br>0.0991,<br>0.0314,<br>NA     |
| MR-Lasso           | 0.946,<br>-0.0996,<br>0.0271,<br>0.0276 | 0.433,<br>-0.0500,<br>0.0278,<br>0.0282 | 0.198,<br>-0.0301,<br>0.0278,<br>0.0284 | 0.062,<br>-0.0101,<br>0.0282,<br>0.0287 | 0.046,<br>-0.0003,<br>0.0280,<br>0.0288 | 0.058,<br>0.0095,<br>0.0280,<br>0.029  | 0.171,<br>0.0293,<br>0.0285,<br>0.0292 | 0.400,<br>0.0495,<br>0.0291,<br>0.0295 | 0.899,<br>0.0993,<br>0.0298,<br>0.0304 |
| MR-PRESSO          | 0.525,<br>-0.0803,<br>0.2115,<br>0.0929 | 0.257,<br>-0.0339,<br>0.2085,<br>0.0907 | 0.154,<br>-0.0150,<br>0.2073,<br>0.0897 | 0.106,<br>0.0025,<br>0.2045,<br>0.0874  | 0.107,<br>0.0114,<br>0.2046,<br>0.0873  | 0.114,<br>0.0211,<br>0.2045,<br>0.087  | 0.159,<br>0.0380,<br>0.2024,<br>0.0851 | 0.261,<br>0.0554,<br>0.1995,<br>0.083  | 0.522,<br>0.1011,<br>0.1943,<br>0.079  |
| MR-IVW             | 0.112,<br>-0.0390,<br>0.2471,<br>0.2342 | 0.055,<br>-0.0390,<br>0.2470,<br>0.2342 | 0.043,<br>-0.0191,<br>0.2470,<br>0.2342 | 0.032,<br>0.0009,<br>0.2470,<br>0.2342  | 0.025,<br>0.0109,<br>0.2470,<br>0.2342  | 0.027,<br>0.0209,<br>0.2470,<br>0.2342 | 0.037,<br>0.0409,<br>0.2470,<br>0.2342 | 0.050,<br>0.0609,<br>0.2470,<br>0.2342 | 0.113,<br>0.1108,<br>0.2470,<br>0.2342 |
| MR-IVW-Oracle      | 0.949,<br>-0.0998,<br>0.0268,<br>0.0278 | 0.422,<br>-0.0500,<br>0.0263,<br>0.0284 | 0.187,<br>-0.0301,<br>0.0266,<br>0.0286 | 0.054,<br>-0.0102,<br>0.0268,<br>0.0289 | 0.040,<br>-0.0002,<br>0.0270,<br>0.029  | 0.051,<br>0.0097,<br>0.0271,<br>0.0292 | 0.164,<br>0.0296,<br>0.0274,<br>0.0295 | 0.393,<br>0.0495,<br>0.0277,<br>0.0298 | 0.900,<br>0.0993,<br>0.0285,<br>0.0306 |
| MR-Egger           | 0.081,<br>-0.1124,<br>1.3324,<br>1.2673 | 0.079,<br>-0.0683,<br>1.3322,<br>1.2671 | 0.080,<br>-0.0507,<br>1.3321,<br>1.267  | 0.081,<br>-0.0330,<br>1.3320,<br>1.267  | 0.083,<br>-0.0242,<br>1.3319,<br>1.267  | 0.083,<br>-0.0154,<br>1.3319,<br>1.267 | 0.085,<br>0.0022,<br>1.3318,<br>1.2669 | 0.087,<br>0.0199,<br>1.3318,<br>1.2669 | 0.087,<br>0.0639,<br>1.3317,<br>1.2669 |
| MR-Weighted-Median | 0.829,<br>-0.0979,<br>0.0319,<br>0.0337 | 0.309,<br>-0.0492,<br>0.0325,<br>0.0343 | 0.124,<br>-0.0296,<br>0.0328,<br>0.0346 | 0.037,<br>-0.0101,<br>0.0331,<br>0.035  | 0.032,<br>-0.0003,<br>0.0333,<br>0.0351 | 0.045,<br>0.0095,<br>0.0334,<br>0.0353 | 0.123,<br>0.0290,<br>0.0337,<br>0.0357 | 0.278,<br>0.0484,<br>0.0341,<br>0.0361 | 0.747,<br>0.0970,<br>0.0349,<br>0.0372 |
| MR-Weighted-Mode   | 0.755,<br>-0.0987,<br>0.0340,<br>0.0376 | 0.253,<br>-0.0496,<br>0.0347,<br>0.0383 | 0.101,<br>-0.0299,<br>0.0351,<br>0.0386 | 0.037,<br>-0.0105,<br>0.0355,<br>0.039  | 0.021,<br>-0.0007,<br>0.0356,<br>0.0392 | 0.031,<br>0.0091,<br>0.0358,<br>0.0394 | 0.090,<br>0.0287,<br>0.0362,<br>0.0398 | 0.236,<br>0.0485,<br>0.0367,<br>0.0402 | 0.674,<br>0.0976,<br>0.0377,<br>0.0414 |
| MR-RAPS1           | 0.136,<br>-0.0889,<br>0.2410,<br>0.2238 | 0.078,<br>-0.0389,<br>0.2411,<br>0.2238 | 0.058,<br>-0.0189,<br>0.2411,<br>0.2238 | 0.043,<br>0.0012,<br>0.2412,<br>0.2238  | 0.040,<br>0.0112,<br>0.2412,<br>0.2238  | 0.040,<br>0.0212,<br>0.2412,<br>0.2238 | 0.048,<br>0.0412,<br>0.2413,<br>0.2238 | 0.066,<br>0.0612,<br>0.2413,<br>0.2238 | 0.147,<br>0.1113,<br>0.2414,<br>0.2239 |
| MR-RAPS2           | 0.901,<br>-0.0764,<br>3.2138,<br>0.0776 | 0.757,<br>0.0771,<br>2.5930,<br>0.0648  | 0.672,<br>0.4224,<br>2.9590,<br>0.0665  | 0.629,<br>0.5567,<br>3.7350,<br>0.079   | 0.623,<br>0.5403,<br>3.8176,<br>0.074   | 0.624,<br>0.7386,<br>4.7511,<br>0.0832 | 0.690,<br>1.1735,<br>5.7913,<br>0.1106 | 0.749,<br>1.1140,<br>5.2713,<br>0.1117 | 0.896,<br>0.6427,<br>6.0397,<br>0.1136 |
| MR-RAPS3           | 0.899,<br>-0.1889,<br>0.5604,<br>0.0732 | 0.810,<br>0.0415,<br>3.8089,<br>14.8032 | 0.797,<br>0.0731,<br>3.2619,<br>2.8162  | 0.794,<br>0.0099,<br>4.702,<br>0.0626   | 0.785,<br>0.0260,<br>4.535,<br>0.0582   | 0.795,<br>0.0428,<br>4.4449,<br>0.0561 | 0.791,<br>0.0768,<br>4.435,<br>0.0538  | 0.818,<br>0.1099,<br>4.4251,<br>0.0521 | 0.886,<br>0.1877,<br>4.064,<br>0.0495  |
| MR-RAPS4           | 0.995,<br>-0.2234,<br>1.2807,<br>0.0503 | 0.907,<br>0.0267,<br>1.2697,<br>0.0486  | 0.858,<br>0.0880,<br>1.2736,<br>0.0484  | 0.810,<br>0.2014,<br>1.2339,<br>0.0475  | 0.798,<br>0.2672,<br>1.2305,<br>0.0477  | 0.795,<br>0.3081,<br>1.1909,<br>0.0462 | 0.824,<br>0.4070,<br>1.1715,<br>0.0467 | 0.873,<br>0.4891,<br>1.1353,<br>0.0465 | 0.991,<br>0.7079,<br>1.0264,<br>0.0464 |

Table S30: Main simulations: in each cell, from top to bottom are empirical type-I error/power, mean( $\hat{\theta}$ ), SD( $\hat{\theta}$ ), mean(SE( $\hat{\theta}$ )) when  $m = 10$ , the InSIDE satisfied,  $q = 0.2$ , and  $n = 100000$ .

| Methods \ $\theta$ | -0.1                                    | -0.05                                   | -0.03                                   | -0.01                                   | 0                                      | 0.01                                   | 0.03                                   | 0.05                                   | 0.1                                    |
|--------------------|-----------------------------------------|-----------------------------------------|-----------------------------------------|-----------------------------------------|----------------------------------------|----------------------------------------|----------------------------------------|----------------------------------------|----------------------------------------|
| cML-MA-AIC         | 0.926,<br>-0.0863,<br>0.0232,<br>0.0246 | 0.341,<br>-0.0378,<br>0.0217,<br>0.0245 | 0.117,<br>-0.0205,<br>0.0200,<br>0.024  | 0.025,<br>-0.0057,<br>0.0183,<br>0.0237 | 0.022,<br>0.0013,<br>0.0182,<br>0.0237 | 0.042,<br>0.0081,<br>0.0188,<br>0.024  | 0.134,<br>0.0233,<br>0.0212,<br>0.0247 | 0.387,<br>0.0407,<br>0.0235,<br>0.0255 | 0.872,<br>0.0885,<br>0.0264,<br>0.0269 |
| cML-MA-AIC-Profile | 0.926,<br>-0.0864,<br>0.0233,<br>0.0247 | 0.338,<br>-0.0378,<br>0.0217,<br>0.0245 | 0.117,<br>-0.0205,<br>0.0200,<br>0.0241 | 0.024,<br>-0.0058,<br>0.0183,<br>0.0238 | 0.022,<br>0.0013,<br>0.0182,<br>0.0238 | 0.042,<br>0.0081,<br>0.0188,<br>0.0241 | 0.133,<br>0.0233,<br>0.0212,<br>0.0247 | 0.385,<br>0.0407,<br>0.0235,<br>0.0256 | 0.873,<br>0.0887,<br>0.0264,<br>0.027  |
| cML-AIC            | 0.965,<br>-0.0921,<br>0.0256,<br>0.0197 | 0.572,<br>-0.0428,<br>0.0251,<br>0.0201 | 0.280,<br>-0.0239,<br>0.0232,<br>0.0202 | 0.098,<br>-0.0069,<br>0.0232,<br>0.0204 | 0.080,<br>0.0015,<br>0.0229,<br>0.0205 | 0.109,<br>0.0097,<br>0.0235,<br>0.0206 | 0.309,<br>0.0269,<br>0.0251,<br>0.0208 | 0.603,<br>0.0455,<br>0.0269,<br>0.021  | 0.937,<br>0.0947,<br>0.0284,<br>0.0217 |
| cML-AIC-Profile    | 0.964,<br>-0.0922,<br>0.0257,<br>0.0198 | 0.569,<br>-0.0428,<br>0.0251,<br>0.0201 | 0.281,<br>-0.0239,<br>0.0245,<br>0.0203 | 0.097,<br>-0.0069,<br>0.0232,<br>0.0205 | 0.079,<br>0.0015,<br>0.0229,<br>0.0205 | 0.109,<br>0.0097,<br>0.0235,<br>0.0207 | 0.308,<br>0.0269,<br>0.0251,<br>0.0209 | 0.602,<br>0.0455,<br>0.0269,<br>0.0211 | 0.938,<br>0.0950,<br>0.0284,<br>0.0217 |
| cML-MA-BIC         | 0.999,<br>-0.0988,<br>0.0189,<br>0.0183 | 0.733,<br>-0.0488,<br>0.0192,<br>0.0187 | 0.342,<br>-0.0288,<br>0.0193,<br>0.0188 | 0.084,<br>-0.0089,<br>0.0195,<br>0.019  | 0.051,<br>0.0011,<br>0.0195,<br>0.0191 | 0.092,<br>0.0110,<br>0.0196,<br>0.0192 | 0.371,<br>0.0310,<br>0.0199,<br>0.0194 | 0.728,<br>0.0510,<br>0.0202,<br>0.0196 | 0.997,<br>0.1010,<br>0.0208,<br>0.0202 |
| cML-MA-BIC-Profile | 0.999,<br>-0.0988,<br>0.0189,<br>0.0184 | 0.730,<br>-0.0488,<br>0.0192,<br>0.0187 | 0.341,<br>-0.0288,<br>0.0193,<br>0.0188 | 0.083,<br>-0.0089,<br>0.0195,<br>0.019  | 0.051,<br>0.0011,<br>0.0195,<br>0.0191 | 0.092,<br>0.0110,<br>0.0196,<br>0.0192 | 0.369,<br>0.0310,<br>0.0199,<br>0.0194 | 0.727,<br>0.0510,<br>0.0202,<br>0.0196 | 0.997,<br>0.1010,<br>0.0208,<br>0.0202 |
| cML-BIC            | 1.000,<br>-0.0990,<br>0.0189,<br>0.0181 | 0.743,<br>-0.0489,<br>0.0192,<br>0.0185 | 0.353,<br>-0.0289,<br>0.0193,<br>0.0186 | 0.088,<br>-0.0089,<br>0.0195,<br>0.0188 | 0.055,<br>0.0011,<br>0.0196,<br>0.0189 | 0.094,<br>0.0111,<br>0.0197,<br>0.019  | 0.376,<br>0.0310,<br>0.0200,<br>0.0192 | 0.740,<br>0.0511,<br>0.0202,<br>0.0194 | 0.997,<br>0.1011,<br>0.0207,<br>0.02   |
| cML-BIC-Profile    | 1.000,<br>-0.0990,<br>0.0189,<br>0.0182 | 0.740,<br>-0.0490,<br>0.0192,<br>0.0185 | 0.353,<br>-0.0289,<br>0.0193,<br>0.0186 | 0.087,<br>-0.0089,<br>0.0195,<br>0.0188 | 0.055,<br>0.0011,<br>0.0196,<br>0.0189 | 0.094,<br>0.0111,<br>0.0197,<br>0.019  | 0.375,<br>0.0310,<br>0.0200,<br>0.0192 | 0.739,<br>0.0511,<br>0.0202,<br>0.0194 | 0.997,<br>0.1011,<br>0.0207,<br>0.02   |
| MR-Mix             | 0.988,<br>-0.1047,<br>0.0219,<br>0.0254 | 0.539,<br>-0.0509,<br>0.0219,<br>0.0253 | 0.189,<br>-0.0301,<br>0.0219,<br>0.0254 | 0.034,<br>-0.0096,<br>0.0217,<br>0.0254 | 0.026,<br>0.0006,<br>0.0218,<br>0.0254 | 0.048,<br>0.0105,<br>0.0217,<br>0.0254 | 0.214,<br>0.0302,<br>0.0219,<br>0.0254 | 0.524,<br>0.0495,<br>0.0218,<br>0.0256 | 0.964,<br>0.0958,<br>0.0220,<br>0.0255 |
| MR-ContMix         | 0.997,<br>-0.0984,<br>0.0197,<br>NA     | 0.731,<br>-0.0483,<br>0.0201,<br>NA     | 0.356,<br>-0.0283,<br>0.0204,<br>NA     | 0.103,<br>-0.0084,<br>0.0205,<br>NA     | 0.065,<br>0.0016,<br>0.0208,<br>NA     | 0.105,<br>0.0116,<br>0.0209,<br>NA     | 0.390,<br>0.0315,<br>0.0212,<br>NA     | 0.740,<br>0.0515,<br>0.0215,<br>NA     | 0.991,<br>0.1013,<br>0.0221,<br>NA     |
| MR-Lasso           | 0.996,<br>-0.0985,<br>0.0193,<br>0.0194 | 0.673,<br>-0.0486,<br>0.0196,<br>0.0199 | 0.307,<br>-0.0286,<br>0.0197,<br>0.02   | 0.075,<br>-0.0088,<br>0.0201,<br>0.0202 | 0.051,<br>0.0012,<br>0.0202,<br>0.0203 | 0.083,<br>0.0112,<br>0.0202,<br>0.0204 | 0.344,<br>0.0312,<br>0.0205,<br>0.0206 | 0.690,<br>0.0511,<br>0.0207,<br>0.0209 | 0.989,<br>0.1010,<br>0.0215,<br>0.0215 |
| MR-PRESSO          | 0.517,<br>-0.0953,<br>0.2290,<br>0.1123 | 0.318,<br>-0.0459,<br>0.2287,<br>0.1116 | 0.176,<br>-0.0263,<br>0.2285,<br>0.1113 | 0.072,<br>-0.0061,<br>0.2281,<br>0.111  | 0.065,<br>0.0034,<br>0.2278,<br>0.1105 | 0.091,<br>0.0130,<br>0.2276,<br>0.1102 | 0.210,<br>0.0328,<br>0.2277,<br>0.1104 | 0.338,<br>0.0524,<br>0.2276,<br>0.1105 | 0.525,<br>0.1007,<br>0.2264,<br>0.1093 |
| MR-IVW             | 0.106,<br>-0.0966,<br>0.2365,<br>0.2336 | 0.038,<br>-0.0465,<br>0.2365,<br>0.2336 | 0.029,<br>-0.0264,<br>0.2365,<br>0.2336 | 0.020,<br>-0.0064,<br>0.2365,<br>0.2336 | 0.019,<br>0.0036,<br>0.2364,<br>0.2336 | 0.024,<br>0.0136,<br>0.2364,<br>0.2336 | 0.034,<br>0.0337,<br>0.2364,<br>0.2336 | 0.048,<br>0.0537,<br>0.2364,<br>0.2336 | 0.107,<br>0.1037,<br>0.2364,<br>0.2336 |
| MR-IVW-Oracle      | 0.998,<br>-0.0988,<br>0.0187,<br>0.0196 | 0.673,<br>-0.0488,<br>0.0191,<br>0.02   | 0.302,<br>-0.0289,<br>0.0193,<br>0.0202 | 0.069,<br>-0.0089,<br>0.0194,<br>0.0204 | 0.044,<br>0.0011,<br>0.0195,<br>0.0205 | 0.075,<br>0.0110,<br>0.0196,<br>0.0206 | 0.331,<br>0.0310,<br>0.0198,<br>0.0208 | 0.686,<br>0.0510,<br>0.0200,<br>0.021  | 0.993,<br>0.1009,<br>0.0206,<br>0.0216 |
| MR-Egger           | 0.084,<br>-0.0660,<br>1.4052,<br>1.3167 | 0.081,<br>-0.0187,<br>1.4047,<br>1.3167 | 0.080,<br>0.0002,<br>1.4045,<br>1.3167  | 0.079,<br>0.0191,<br>1.4043,<br>1.3167  | 0.077,<br>0.0285,<br>1.4042,<br>1.3167 | 0.077,<br>0.0379,<br>1.4041,<br>1.3167 | 0.077,<br>0.0568,<br>1.4040,<br>1.3168 | 0.077,<br>0.0757,<br>1.4038,<br>1.3168 | 0.081,<br>0.1229,<br>1.4034,<br>1.3169 |
| MR-Weighted-Median | 0.990,<br>-0.0975,<br>0.0222,<br>0.0237 | 0.513,<br>-0.0481,<br>0.0226,<br>0.0242 | 0.203,<br>-0.0283,<br>0.0228,<br>0.0244 | 0.046,<br>-0.0086,<br>0.0230,<br>0.0246 | 0.031,<br>0.0012,<br>0.0232,<br>0.0247 | 0.062,<br>0.0111,<br>0.0233,<br>0.0248 | 0.225,<br>0.0308,<br>0.0236,<br>0.0251 | 0.534,<br>0.0505,<br>0.0239,<br>0.0254 | 0.970,<br>0.0997,<br>0.0246,<br>0.0261 |
| MR-Weighted-Mode   | 0.959,<br>-0.0977,<br>0.0243,<br>0.0266 | 0.422,<br>-0.0482,<br>0.0247,<br>0.0271 | 0.171,<br>-0.0284,<br>0.0247,<br>0.0273 | 0.033,<br>-0.0085,<br>0.0247,<br>0.0277 | 0.023,<br>0.0014,<br>0.0249,<br>0.0277 | 0.045,<br>0.0112,<br>0.0251,<br>0.0279 | 0.176,<br>0.0310,<br>0.0254,<br>0.0281 | 0.458,<br>0.0507,<br>0.0256,<br>0.0285 | 0.925,<br>0.1003,<br>0.0262,<br>0.0293 |
| MR-RAPS1           | 0.148,<br>-0.0954,<br>0.2296,<br>0.2225 | 0.055,<br>-0.0454,<br>0.2296,<br>0.2226 | 0.042,<br>-0.0254,<br>0.2296,<br>0.2226 | 0.033,<br>-0.0054,<br>0.2297,<br>0.2226 | 0.031,<br>0.0046,<br>0.2297,<br>0.2226 | 0.033,<br>0.0147,<br>0.2297,<br>0.2226 | 0.040,<br>0.0347,<br>0.2297,<br>0.2226 | 0.058,<br>0.0547,<br>0.2297,<br>0.2226 | 0.142,<br>0.1047,<br>0.2298,<br>0.2227 |
| MR-RAPS2           | 0.926,<br>-0.1293,<br>3.9699,<br>0.0665 | 0.756,<br>0.0720,<br>2.9083,<br>0.0457  | 0.420,<br>0.2497,<br>3.7601,<br>0.048   | 0.187,<br>0.2705,<br>3.6465,<br>0.0536  | 0.160,<br>0.5470,<br>3.1943,<br>0.0544 | 0.200,<br>0.6700,<br>8.0029,<br>0.0618 | 0.485,<br>0.8761,<br>3.9672,<br>0.0751 | 0.755,<br>1.0341,<br>4.2728,<br>0.0865 | 0.924,<br>0.6349,<br>3.9908,<br>0.084  |
| MR-RAPS3           | 0.929,<br>-0.2029,<br>0.4917,<br>0.0509 | 0.859,<br>-0.0747,<br>0.5223,<br>0.0917 | 0.842,<br>-0.0463,<br>0.4329,<br>0.0418 | 0.829,<br>-0.0095,<br>0.4212,<br>0.0392 | 0.836,<br>0.0088,<br>0.4169,<br>0.0386 | 0.836,<br>0.0270,<br>0.4131,<br>0.038  | 0.846,<br>0.0626,<br>0.4058,<br>0.0371 | 0.851,<br>0.0971,<br>0.3990,<br>0.0363 | 0.918,<br>0.1775,<br>0.3834,<br>0.0347 |
| MR-RAPS4           | 0.999,<br>-0.0988,<br>0.0193,<br>0.0167 | 0.797,<br>-0.0488,<br>0.0197,<br>0.0169 | 0.407,<br>-0.0288,<br>0.0199,<br>0.0171 | 0.129,<br>-0.0088,<br>0.0200,<br>0.0172 | 0.093,<br>0.0012,<br>0.0201,<br>0.0173 | 0.138,<br>0.0112,<br>0.0202,<br>0.0174 | 0.451,<br>0.0312,<br>0.0204,<br>0.0176 | 0.788,<br>0.0513,<br>0.0207,<br>0.0178 | 0.999,<br>0.1013,<br>0.0213,<br>0.0183 |

Table S31: Main simulations: in each cell, from top to bottom are empirical type-I error/power, mean( $\hat{\theta}$ ), SD( $\hat{\theta}$ ), mean(SE( $\hat{\theta}$ )) when  $m = 10$ , the InSIDE satisfied,  $q = 0.2$ , and  $n = 200000$ .

| Methods \ $\theta$ | -0.1                                    | -0.05                                   | -0.03                                   | -0.01                                   | 0                                       | 0.01                                    | 0.03                                    | 0.05                                    | 0.1                                    |
|--------------------|-----------------------------------------|-----------------------------------------|-----------------------------------------|-----------------------------------------|-----------------------------------------|-----------------------------------------|-----------------------------------------|-----------------------------------------|----------------------------------------|
| cML-MA-AIC         | 0.990,<br>-0.0916,<br>0.0166,<br>0.0175 | 0.665,<br>-0.0418,<br>0.0163,<br>0.0177 | 0.255,<br>-0.0231,<br>0.0151,<br>0.0174 | 0.040,<br>-0.0071,<br>0.0130,<br>0.017  | 0.024,<br>-0.0003,<br>0.0129,<br>0.0169 | 0.033,<br>0.0066,<br>0.0135,<br>0.017   | 0.247,<br>0.0224,<br>0.0157,<br>0.0178  | 0.609,<br>0.0407,<br>0.0177,<br>0.0184  | 0.975,<br>0.0898,<br>0.0191,<br>0.0192 |
| cML-MA-AIC-Profile | 0.990,<br>-0.0917,<br>0.0167,<br>0.0176 | 0.665,<br>-0.0418,<br>0.0163,<br>0.0177 | 0.255,<br>-0.0231,<br>0.0151,<br>0.0174 | 0.040,<br>-0.0071,<br>0.0130,<br>0.017  | 0.024,<br>-0.0003,<br>0.0129,<br>0.0169 | 0.033,<br>0.0066,<br>0.0135,<br>0.017   | 0.246,<br>0.0224,<br>0.0157,<br>0.0178  | 0.609,<br>0.0408,<br>0.0177,<br>0.0184  | 0.975,<br>0.0899,<br>0.0191,<br>0.0192 |
| cML-AIC            | 0.993,<br>-0.0959,<br>0.0182,<br>0.014  | 0.845,<br>-0.0460,<br>0.0180,<br>0.0142 | 0.497,<br>-0.0265,<br>0.0175,<br>0.0143 | 0.126,<br>-0.0082,<br>0.0165,<br>0.0144 | 0.076,<br>-0.0002,<br>0.0165,<br>0.0145 | 0.126,<br>0.0080,<br>0.0172,<br>0.0146  | 0.478,<br>0.0258,<br>0.0184,<br>0.0147  | 0.788,<br>0.0449,<br>0.0198,<br>0.0149  | 0.987,<br>0.0943,<br>0.0207,<br>0.0153 |
| cML-AIC-Profile    | 0.993,<br>-0.0960,<br>0.0183,<br>0.014  | 0.845,<br>-0.0461,<br>0.0180,<br>0.0142 | 0.497,<br>-0.0265,<br>0.0175,<br>0.0143 | 0.126,<br>-0.0082,<br>0.0165,<br>0.0144 | 0.076,<br>-0.0002,<br>0.0165,<br>0.0145 | 0.124,<br>0.0080,<br>0.0172,<br>0.0146  | 0.477,<br>0.0258,<br>0.0184,<br>0.0147  | 0.788,<br>0.0449,<br>0.0198,<br>0.0149  | 0.987,<br>0.0944,<br>0.0207,<br>0.0154 |
| cML-MA-BIC         | 1.000,<br>-0.1005,<br>0.0133,<br>0.0129 | 0.965,<br>-0.0505,<br>0.0135,<br>0.0131 | 0.636,<br>-0.0306,<br>0.0136,<br>0.0132 | 0.118,<br>-0.0106,<br>0.0137,<br>0.0134 | 0.049,<br>-0.0006,<br>0.0137,<br>0.0134 | 0.120,<br>0.0094,<br>0.0138,<br>0.0135  | 0.577,<br>0.0293,<br>0.0140,<br>0.0136  | 0.932,<br>0.0493,<br>0.0141,<br>0.0138  | 1.000,<br>0.0993,<br>0.0145,<br>0.0142 |
| cML-MA-BIC-Profile | 1.000,<br>-0.1005,<br>0.0133,<br>0.0129 | 0.965,<br>-0.0505,<br>0.0135,<br>0.0131 | 0.636,<br>-0.0306,<br>0.0136,<br>0.0133 | 0.117,<br>-0.0106,<br>0.0137,<br>0.0134 | 0.049,<br>-0.0006,<br>0.0137,<br>0.0134 | 0.120,<br>0.0094,<br>0.0138,<br>0.0135  | 0.575,<br>0.0293,<br>0.0140,<br>0.0136  | 0.932,<br>0.0493,<br>0.0141,<br>0.0138  | 1.000,<br>0.0993,<br>0.0145,<br>0.0142 |
| cML-BIC            | 1.000,<br>-0.1006,<br>0.0133,<br>0.0128 | 0.966,<br>-0.0506,<br>0.0135,<br>0.013  | 0.643,<br>-0.0306,<br>0.0136,<br>0.0131 | 0.121,<br>-0.0106,<br>0.0137,<br>0.0133 | 0.053,<br>-0.0006,<br>0.0138,<br>0.0133 | 0.122,<br>0.0093,<br>0.0138,<br>0.0134  | 0.584,<br>0.0293,<br>0.0140,<br>0.0135  | 0.935,<br>0.0493,<br>0.0141,<br>0.0137  | 1.000,<br>0.0993,<br>0.0145,<br>0.0141 |
| cML-BIC-Profile    | 1.000,<br>-0.1006,<br>0.0133,<br>0.0128 | 0.966,<br>-0.0506,<br>0.0135,<br>0.013  | 0.643,<br>-0.0306,<br>0.0136,<br>0.0131 | 0.122,<br>-0.0106,<br>0.0137,<br>0.0133 | 0.053,<br>-0.0006,<br>0.0138,<br>0.0133 | 0.122,<br>0.0093,<br>0.0138,<br>0.0134  | 0.584,<br>0.0293,<br>0.0140,<br>0.0135  | 0.935,<br>0.0493,<br>0.0141,<br>0.0137  | 1.000,<br>0.0993,<br>0.0145,<br>0.0141 |
| MR-Mix             | 0.999,<br>-0.1061,<br>0.0159,<br>0.0183 | 0.846,<br>-0.0526,<br>0.0158,<br>0.0182 | 0.416,<br>-0.0315,<br>0.0157,<br>0.0182 | 0.062,<br>-0.0111,<br>0.0157,<br>0.0182 | 0.025,<br>-0.0010,<br>0.0157,<br>0.0182 | 0.056,<br>0.0090,<br>0.0157,<br>0.0182  | 0.354,<br>0.0287,<br>0.0156,<br>0.0182  | 0.769,<br>0.0479,<br>0.0158,<br>0.0182  | 0.994,<br>0.0945,<br>0.0157,<br>0.0183 |
| MR-ContMix         | 1.000,<br>-0.1002,<br>0.0138,<br>NA     | 0.958,<br>-0.0504,<br>0.0140,<br>NA     | 0.660,<br>-0.0304,<br>0.0141,<br>NA     | 0.144,<br>-0.0104,<br>0.0142,<br>NA     | 0.078,<br>-0.0005,<br>0.0143,<br>NA     | 0.133,<br>0.0095,<br>0.0143,<br>NA      | 0.607,<br>0.0294,<br>0.0145,<br>NA      | 0.936,<br>0.0494,<br>0.0146,<br>NA      | 1.000,<br>0.0993,<br>0.0151,<br>NA     |
| MR-Lasso           | 1.000,<br>-0.1006,<br>0.0137,<br>0.0138 | 0.941,<br>-0.0506,<br>0.0139,<br>0.0141 | 0.589,<br>-0.0307,<br>0.0140,<br>0.0142 | 0.104,<br>-0.0108,<br>0.0141,<br>0.0144 | 0.048,<br>-0.0008,<br>0.0142,<br>0.0144 | 0.107,<br>0.0092,<br>0.0143,<br>0.0145  | 0.522,<br>0.0291,<br>0.0144,<br>0.0146  | 0.896,<br>0.0491,<br>0.0146,<br>0.0148  | 0.999,<br>0.0990,<br>0.0151,<br>0.0152 |
| MR-PRESSO          | 0.493,<br>-0.1154,<br>0.2375,<br>0.1207 | 0.387,<br>-0.0654,<br>0.2371,<br>0.12   | 0.243,<br>-0.0454,<br>0.2371,<br>0.1198 | 0.088,<br>-0.0255,<br>0.2371,<br>0.1194 | 0.066,<br>-0.0156,<br>0.2369,<br>0.1192 | 0.093,<br>-0.0055,<br>0.2369,<br>0.1192 | 0.241,<br>0.0143,<br>0.2368,<br>0.119   | 0.370,<br>0.0342,<br>0.2367,<br>0.119   | 0.495,<br>0.0842,<br>0.2364,<br>0.1184 |
| MR-IVW             | 0.128,<br>-0.1158,<br>0.2418,<br>0.2338 | 0.056,<br>-0.0657,<br>0.2417,<br>0.2338 | 0.035,<br>-0.0456,<br>0.2416,<br>0.2338 | 0.022,<br>-0.0256,<br>0.2416,<br>0.2337 | 0.022,<br>-0.0156,<br>0.2415,<br>0.2337 | 0.023,<br>-0.0056,<br>0.2415,<br>0.2337 | 0.029,<br>0.0145,<br>0.2415,<br>0.2337  | 0.039,<br>0.0345,<br>0.2414,<br>0.2337  | 0.100,<br>0.0845,<br>0.2413,<br>0.2337 |
| MR-IVW-Oracle      | 1.000,<br>-0.1004,<br>0.0132,<br>0.0139 | 0.942,<br>-0.0505,<br>0.0134,<br>0.0142 | 0.581,<br>-0.0306,<br>0.0135,<br>0.0143 | 0.093,<br>-0.0106,<br>0.0136,<br>0.0145 | 0.036,<br>-0.0006,<br>0.0137,<br>0.0145 | 0.102,<br>0.0094,<br>0.0137,<br>0.0146  | 0.522,<br>0.0293,<br>0.0139,<br>0.0147  | 0.903,<br>0.0493,<br>0.0140,<br>0.0149  | 0.999,<br>0.0992,<br>0.0144,<br>0.0153 |
| MR-Egger           | 0.071,<br>-0.1706,<br>1.3437,<br>1.3309 | 0.070,<br>-0.1222,<br>1.3435,<br>1.3308 | 0.069,<br>-0.1028,<br>1.3434,<br>1.3307 | 0.070,<br>-0.0834,<br>1.3433,<br>1.3307 | 0.070,<br>-0.0737,<br>1.3432,<br>1.3307 | 0.070,<br>-0.0641,<br>1.3432,<br>1.3307 | 0.068,<br>-0.0447,<br>1.3431,<br>1.3306 | 0.069,<br>-0.0253,<br>1.3430,<br>1.3306 | 0.071,<br>0.0231,<br>1.3428,<br>1.3306 |
| MR-Weighted-Median | 1.000,<br>-0.0999,<br>0.0157,<br>0.0168 | 0.855,<br>-0.0503,<br>0.0160,<br>0.0171 | 0.423,<br>-0.0305,<br>0.0162,<br>0.0173 | 0.079,<br>-0.0106,<br>0.0164,<br>0.0174 | 0.040,<br>-0.0007,<br>0.0165,<br>0.0175 | 0.057,<br>0.0092,<br>0.0166,<br>0.0176  | 0.392,<br>0.0290,<br>0.0168,<br>0.0178  | 0.781,<br>0.0489,<br>0.0171,<br>0.018   | 0.999,<br>0.0984,<br>0.0177,<br>0.0185 |
| MR-Weighted-Mode   | 1.000,<br>-0.0999,<br>0.0166,<br>0.0189 | 0.769,<br>-0.0502,<br>0.0170,<br>0.0193 | 0.337,<br>-0.0304,<br>0.0172,<br>0.0194 | 0.060,<br>-0.0105,<br>0.0173,<br>0.0196 | 0.030,<br>-0.0005,<br>0.0174,<br>0.0197 | 0.046,<br>0.0095,<br>0.0176,<br>0.0198  | 0.322,<br>0.0293,<br>0.0178,<br>0.02    | 0.707,<br>0.0492,<br>0.0182,<br>0.0202  | 0.993,<br>0.0990,<br>0.0188,<br>0.0208 |
| MR-RAPS1           | 0.171,<br>-0.1144,<br>0.2336,<br>0.2223 | 0.069,<br>-0.0644,<br>0.2336,<br>0.2223 | 0.044,<br>-0.0444,<br>0.2336,<br>0.2223 | 0.030,<br>-0.0244,<br>0.2336,<br>0.2223 | 0.030,<br>-0.0144,<br>0.2336,<br>0.2223 | 0.024,<br>-0.0044,<br>0.2336,<br>0.2223 | 0.036,<br>0.0156,<br>0.2336,<br>0.2223  | 0.058,<br>0.0356,<br>0.2336,<br>0.2223  | 0.126,<br>0.0855,<br>0.2336,<br>0.2224 |
| MR-RAPS2           | 0.939,<br>0.0667,<br>4.1364,<br>0.071   | 0.923,<br>-0.0469,<br>3.3717,<br>0.0709 | 0.731,<br>0.1500,<br>4.0999,<br>0.0735  | 0.335,<br>0.1544,<br>3.5386,<br>0.0687  | 0.264,<br>-0.0108,<br>3.5733,<br>0.0658 | 0.350,<br>-0.0979,<br>4.4794,<br>0.0763 | 0.678,<br>-0.3080,<br>5.0440,<br>0.0742 | 0.904,<br>0.0703,<br>3.7687,<br>0.0663  | 0.943,<br>0.2736,<br>3.4304,<br>0.0647 |
| MR-RAPS3           | 0.939,<br>-0.3156,<br>2.7672,<br>0.4842 | 0.910,<br>-0.1309,<br>0.5608,<br>0.0832 | 0.906,<br>-0.0820,<br>0.4483,<br>0.0292 | 0.893,<br>-0.0450,<br>0.4358,<br>0.0277 | 0.897,<br>-0.0266,<br>0.4311,<br>0.0273 | 0.881,<br>-0.0083,<br>0.4268,<br>0.0272 | 0.879,<br>0.0283,<br>0.4190,<br>0.0267  | 0.890,<br>0.0628,<br>0.4128,<br>0.0256  | 0.940,<br>0.1434,<br>0.3973,<br>0.0244 |
| MR-RAPS4           | 1.000,<br>-0.1005,<br>0.0135,<br>0.0117 | 0.973,<br>-0.0493,<br>0.0347,<br>0.0119 | 0.705,<br>-0.0256,<br>0.0647,<br>0.0121 | 0.189,<br>0.0035,<br>0.1212,<br>0.0123  | 0.104,<br>0.0133,<br>0.1092,<br>0.0123  | 0.171,<br>0.0194,<br>0.0893,<br>0.0123  | 0.642,<br>0.0323,<br>0.0504,<br>0.0124  | 0.957,<br>0.0503,<br>0.0515,<br>0.0125  | 1.000,<br>0.0994,<br>0.0148,<br>0.0129 |

Table S32: Main simulations: in each cell, from top to bottom are empirical type-I error/power, mean( $\hat{\theta}$ ), SD( $\hat{\theta}$ ), mean(SE( $\hat{\theta}$ )) when  $m = 10$ , the InSIDE satisfied,  $q = 0.4$ , and  $n = 50000$ .

| Methods \ $\theta$ | -0.1                                      | -0.05                                   | -0.03                                    | -0.01                                     | 0                                        | 0.01                                      | 0.03                                    | 0.05                                   | 0.1                                      |
|--------------------|-------------------------------------------|-----------------------------------------|------------------------------------------|-------------------------------------------|------------------------------------------|-------------------------------------------|-----------------------------------------|----------------------------------------|------------------------------------------|
| cML-MA-AIC         | 0.559,<br>-0.0821,<br>0.0343,<br>0.0398   | 0.120,<br>-0.0364,<br>0.0303,<br>0.0392 | 0.034,<br>-0.0208,<br>0.0282,<br>0.039   | 0.010,<br>-0.0061,<br>0.0267,<br>0.0389   | 0.009,<br>0.0007,<br>0.0269,<br>0.0391   | 0.014,<br>0.0073,<br>0.0273,<br>0.0393    | 0.034,<br>0.0213,<br>0.0295,<br>0.0402  | 0.093,<br>0.0365,<br>0.0324,<br>0.0411 | 0.494,<br>0.0804,<br>0.0382,<br>0.0434   |
| cML-MA-AIC-Profile | 0.553,<br>-0.0822,<br>0.0344,<br>0.04     | 0.117,<br>-0.0364,<br>0.0303,<br>0.0395 | 0.034,<br>-0.0208,<br>0.0282,<br>0.0392  | 0.008,<br>-0.0061,<br>0.0268,<br>0.0392   | 0.009,<br>0.0007,<br>0.0269,<br>0.0393   | 0.014,<br>0.0073,<br>0.0274,<br>0.0396    | 0.034,<br>0.0213,<br>0.0295,<br>0.0404  | 0.093,<br>0.0365,<br>0.0324,<br>0.0414 | 0.493,<br>0.0806,<br>0.0383,<br>0.0437   |
| cML-AIC            | 0.783,<br>-0.0906,<br>0.0382,<br>0.0324   | 0.304,<br>-0.0424,<br>0.0361,<br>0.033  | 0.144,<br>-0.0249,<br>0.0350,<br>0.0332  | 0.056,<br>-0.0072,<br>0.0344,<br>0.0336   | 0.045,<br>0.0008,<br>0.0349,<br>0.0337   | 0.060,<br>0.0086,<br>0.0353,<br>0.0339    | 0.134,<br>0.0251,<br>0.0373,<br>0.0343  | 0.273,<br>0.0420,<br>0.0395,<br>0.0347 | 0.707,<br>0.0889,<br>0.0441,<br>0.0358   |
| cML-AIC-Profile    | 0.780,<br>-0.0907,<br>0.0383,<br>0.0326   | 0.295,<br>-0.0424,<br>0.0361,<br>0.0332 | 0.140,<br>-0.0249,<br>0.0350,<br>0.0335  | 0.054,<br>-0.0072,<br>0.0346,<br>0.0338   | 0.043,<br>0.0008,<br>0.0349,<br>0.0339   | 0.056,<br>0.0086,<br>0.0353,<br>0.0341    | 0.130,<br>0.0251,<br>0.0373,<br>0.0345  | 0.269,<br>0.0420,<br>0.0396,<br>0.035  | 0.706,<br>0.0891,<br>0.0442,<br>0.036    |
| cML-MA-BIC         | 0.914,<br>-0.1004,<br>0.0293,<br>0.0304   | 0.361,<br>-0.0504,<br>0.0297,<br>0.031  | 0.152,<br>-0.0305,<br>0.0299,<br>0.0313  | 0.052,<br>-0.0106,<br>0.0301,<br>0.0315   | 0.042,<br>-0.0007,<br>0.0302,<br>0.0317  | 0.045,<br>0.0093,<br>0.0304,<br>0.0318    | 0.135,<br>0.0291,<br>0.0307,<br>0.0322  | 0.315,<br>0.0491,<br>0.0311,<br>0.0325 | 0.855,<br>0.0990,<br>0.0321,<br>0.0334   |
| cML-MA-BIC-Profile | 0.913,<br>-0.1004,<br>0.0293,<br>0.0305   | 0.356,<br>-0.0504,<br>0.0297,<br>0.0311 | 0.151,<br>-0.0305,<br>0.0299,<br>0.0314  | 0.051,<br>-0.0106,<br>0.0301,<br>0.0317   | 0.041,<br>-0.0007,<br>0.0302,<br>0.0318  | 0.044,<br>0.0093,<br>0.0304,<br>0.032     | 0.133,<br>0.0291,<br>0.0307,<br>0.0323  | 0.314,<br>0.0491,<br>0.0311,<br>0.0326 | 0.852,<br>0.0990,<br>0.0322,<br>0.0336   |
| cML-BIC            | 0.924,<br>-0.1008,<br>0.0294,<br>0.03     | 0.378,<br>-0.0507,<br>0.0299,<br>0.0305 | 0.165,<br>-0.0306,<br>0.0302,<br>0.0308  | 0.058,<br>-0.0106,<br>0.0304,<br>0.0311   | 0.046,<br>-0.0006,<br>0.0306,<br>0.0312  | 0.051,<br>0.0094,<br>0.0308,<br>0.0314    | 0.143,<br>0.0293,<br>0.0310,<br>0.0317  | 0.330,<br>0.0493,<br>0.0314,<br>0.032  | 0.860,<br>0.0994,<br>0.0323,<br>0.033    |
| cML-BIC-Profile    | 0.923,<br>-0.1008,<br>0.0294,<br>0.0301   | 0.371,<br>-0.0507,<br>0.0299,<br>0.0307 | 0.162,<br>-0.0306,<br>0.0302,<br>0.0309  | 0.055,<br>-0.0106,<br>0.0304,<br>0.0312   | 0.046,<br>-0.0006,<br>0.0306,<br>0.0314  | 0.049,<br>0.0094,<br>0.0308,<br>0.0315    | 0.140,<br>0.0293,<br>0.0310,<br>0.0318  | 0.327,<br>0.0493,<br>0.0314,<br>0.0322 | 0.859,<br>0.0994,<br>0.0323,<br>0.0331   |
| MR-Mix             | 0.845,<br>-0.1057,<br>0.0329,<br>0.0376   | 0.288,<br>-0.0525,<br>0.0327,<br>0.0375 | 0.105,<br>-0.0318,<br>0.0325,<br>0.0373  | 0.038,<br>-0.0113,<br>0.0327,<br>0.0371   | 0.024,<br>-0.0012,<br>0.0327,<br>0.0371  | 0.039,<br>0.0088,<br>0.0327,<br>0.037     | 0.095,<br>0.0283,<br>0.0328,<br>0.0372  | 0.235,<br>0.0476,<br>0.0328,<br>0.0372 | 0.743,<br>0.0935,<br>0.0329,<br>0.0375   |
| MR-ContMix         | 0.912,<br>-0.1000,<br>0.0308,<br>NA       | 0.398,<br>-0.0503,<br>0.0314,<br>NA     | 0.178,<br>-0.0304,<br>0.0317,<br>NA      | 0.062,<br>-0.0106,<br>0.0319,<br>NA       | 0.048,<br>-0.0006,<br>0.0320,<br>NA      | 0.064,<br>0.0093,<br>0.0322,<br>NA        | 0.153,<br>0.0291,<br>0.0325,<br>NA      | 0.335,<br>0.0489,<br>0.0329,<br>NA     | 0.861,<br>0.0987,<br>0.0339,<br>NA       |
| MR-Lasso           | 0.880,<br>-0.0987,<br>0.0478,<br>0.0329   | 0.328,<br>-0.0490,<br>0.0505,<br>0.0335 | 0.132,<br>-0.0293,<br>0.0506,<br>0.0338  | 0.047,<br>-0.0094,<br>0.0507,<br>0.0341   | 0.035,<br>0.0005,<br>0.0487,<br>0.0344   | 0.048,<br>0.0105,<br>0.0509,<br>0.0345    | 0.115,<br>0.0306,<br>0.0511,<br>0.0349  | 0.291,<br>0.0506,<br>0.0513,<br>0.0352 | 0.809,<br>1.003,<br>0.0519,<br>0.0362    |
| MR-PRESSO          | 0.396,<br>-0.0857,<br>0.3268,<br>0.1621   | 0.212,<br>-0.0373,<br>0.3259,<br>0.1603 | 0.154,<br>-0.0177,<br>0.3262,<br>0.1606  | 0.128,<br>0.0011,<br>0.3253,<br>0.1586    | 0.125,<br>0.0108,<br>0.3251,<br>0.1581   | 0.127,<br>0.0207,<br>0.3251,<br>0.1581    | 0.161,<br>0.0399,<br>0.3244,<br>0.1532  | 0.234,<br>0.0587,<br>0.3231,<br>0.1516 | 0.391,<br>1.063,<br>0.3219,<br>0.1516    |
| MR-IVW             | 0.097,<br>-0.0905,<br>0.3440,<br>0.3283   | 0.103,<br>-0.0403,<br>0.3439,<br>0.3283 | 0.109,<br>-0.0203,<br>0.3439,<br>0.3283  | 0.112,<br>-0.0002,<br>0.3439,<br>0.3283   | 0.113,<br>0.0098,<br>0.3438,<br>0.3283   | 0.112,<br>0.0198,<br>0.3438,<br>0.3283    | 0.112,<br>0.0399,<br>0.3438,<br>0.3283  | 0.112,<br>0.0599,<br>0.3438,<br>0.3283 | 0.106,<br>1.100,<br>0.3437,<br>0.3283    |
| MR-IVW-Oracle      | 0.884,<br>-0.1003,<br>0.0291,<br>0.0328   | 0.324,<br>-0.0505,<br>0.0296,<br>0.0335 | 0.130,<br>-0.0306,<br>0.0298,<br>0.0338  | 0.045,<br>-0.0107,<br>0.0301,<br>0.0341   | 0.031,<br>-0.0007,<br>0.0303,<br>0.0343  | 0.042,<br>0.0092,<br>0.0304,<br>0.0344    | 0.108,<br>0.0292,<br>0.0307,<br>0.0348  | 0.283,<br>0.0491,<br>0.0311,<br>0.0351 | 0.810,<br>0.0989,<br>0.0321,<br>0.0361   |
| MR-Egger           | 0.079,<br>-0.0580,<br>1.8427,<br>1.7924   | 0.079,<br>-0.0142,<br>1.8425,<br>1.7922 | 0.080,<br>0.0033,<br>1.8424,<br>1.7921   | 0.082,<br>0.0208,<br>1.8424,<br>1.7921    | 0.082,<br>0.0296,<br>1.8423,<br>1.792    | 0.082,<br>0.0384,<br>1.8423,<br>1.792     | 0.081,<br>0.0559,<br>1.8422,<br>1.7919  | 0.080,<br>0.0734,<br>1.8422,<br>1.7919 | 0.080,<br>1.171,<br>1.8421,<br>1.7918    |
| MR-Weighted-Median | 0.721,<br>-0.0969,<br>0.0356,<br>0.0384   | 0.225,<br>-0.0484,<br>0.0362,<br>0.0391 | 0.081,<br>-0.0291,<br>0.0366,<br>0.0394  | 0.033,<br>-0.0098,<br>0.0370,<br>0.0398   | 0.037,<br>-0.0002,<br>0.0372,<br>0.04    | 0.044,<br>0.0095,<br>0.0375,<br>0.0402    | 0.085,<br>0.0288,<br>0.0380,<br>0.0406  | 0.199,<br>0.0480,<br>0.0386,<br>0.041  | 0.642,<br>0.0959,<br>0.0399,<br>0.0422   |
| MR-Weighted-Mode   | 0.872,<br>-0.0988,<br>0.0309,<br>0.0331   | 0.300,<br>-0.0497,<br>0.0313,<br>0.0337 | 0.120,<br>-0.0302,<br>0.0315,<br>0.034   | 0.047,<br>-0.0103,<br>0.0318,<br>0.0343   | 0.044,<br>-0.0005,<br>0.0321,<br>0.0345  | 0.052,<br>0.0093,<br>0.0322,<br>0.0346    | 0.104,<br>0.0289,<br>0.0325,<br>0.035   | 0.271,<br>0.0484,<br>0.0329,<br>0.0353 | 0.795,<br>0.0978,<br>0.0337,<br>0.0364   |
| MR-RAPS1           | 0.105,<br>-0.0930,<br>0.3354,<br>0.3142   | 0.116,<br>-0.0429,<br>0.3355,<br>0.3142 | 0.120,<br>-0.0229,<br>0.3355,<br>0.3142  | 0.119,<br>-0.0029,<br>0.3355,<br>0.3142   | 0.118,<br>0.0072,<br>0.3355,<br>0.3142   | 0.115,<br>0.0172,<br>0.3355,<br>0.3142    | 0.117,<br>0.0372,<br>0.3355,<br>0.3142  | 0.114,<br>0.0572,<br>0.3355,<br>0.3142 | 0.111,<br>1.073,<br>0.3356,<br>0.3143    |
| MR-RAPS2           | 0.078,<br>-0.0942,<br>0.3292,<br>0.327    | 0.076,<br>-0.0450,<br>0.3300,<br>0.3276 | 0.084,<br>-0.0233,<br>0.3317,<br>0.3279  | 0.086,<br>-0.0028,<br>0.3293,<br>0.3286   | 0.092,<br>0.0066,<br>0.3299,<br>0.3291   | 0.092,<br>0.0167,<br>0.3302,<br>0.3295    | 0.087,<br>0.0354,<br>0.3275,<br>0.3285  | 0.087,<br>0.0570,<br>0.3269,<br>0.3275 | 0.079,<br>1.062,<br>0.3302,<br>0.3301    |
| MR-RAPS3           | 0.896,<br>-0.3241,<br>13.0930,<br>12.7633 | 0.864,<br>0.1266,<br>20.7751,<br>38.25  | 0.857,<br>0.1445,<br>19.5143,<br>35.1805 | 0.856,<br>2.4271,<br>49.5897,<br>195.9921 | 0.862,<br>1.3950,<br>42.3294,<br>422.534 | 0.859,<br>-0.3627,<br>10.3500,<br>10.6747 | 0.861,<br>-0.0916,<br>7.1335,<br>57.192 | 0.877,<br>0.3121,<br>6.6967,<br>7.4227 | 0.896,<br>0.6502,<br>12.8237,<br>18.2533 |
| MR-RAPS4           | 0.986,<br>0.3623,<br>1.5807,<br>0.1621    | 0.983,<br>0.3262,<br>1.6056,<br>0.1149  | 0.974,<br>0.3552,<br>1.5778,<br>0.1227   | 0.961,<br>0.3088,<br>1.6007,<br>0.8658    | 0.952,<br>0.3373,<br>1.6014,<br>0.1237   | 0.953,<br>0.2926,<br>1.5770,<br>0.1079    | 0.963,<br>0.2641,<br>1.6315,<br>0.1217  | 0.971,<br>0.2457,<br>1.6184,<br>0.1786 | 0.990,<br>0.1394,<br>1.6111,<br>0.1694   |

Table S33: Main simulations: in each cell, from top to bottom are empirical type-I error/power, mean( $\hat{\theta}$ ), SD( $\hat{\theta}$ ), mean(SE( $\hat{\theta}$ )) when  $m = 10$ , the InSIDE satisfied,  $q = 0.4$ , and  $n = 100000$ .

| Methods \ $\theta$ | -0.1                                      | -0.05                                   | -0.03                                   | -0.01                                   | 0                                       | 0.01                                   | 0.03                                   | 0.05                                   | 0.1                                    |
|--------------------|-------------------------------------------|-----------------------------------------|-----------------------------------------|-----------------------------------------|-----------------------------------------|----------------------------------------|----------------------------------------|----------------------------------------|----------------------------------------|
| cML-MA-AIC         | 0.838,<br>-0.0857,<br>0.0257,<br>0.0287   | 0.256,<br>-0.0378,<br>0.0235,<br>0.0284 | 0.076,<br>-0.0209,<br>0.0212,<br>0.0281 | 0.012,<br>-0.0064,<br>0.0195,<br>0.0279 | 0.012,<br>0.0005,<br>0.0195,<br>0.0279  | 0.023,<br>0.0071,<br>0.0200,<br>0.0281 | 0.082,<br>0.0217,<br>0.0224,<br>0.0289 | 0.240,<br>0.0379,<br>0.0253,<br>0.0297 | 0.774,<br>0.0850,<br>0.0288,<br>0.0313 |
| cML-MA-AIC-Profile | 0.838,<br>-0.0858,<br>0.0258,<br>0.0285   | 0.255,<br>-0.0378,<br>0.0235,<br>0.0285 | 0.073,<br>-0.0209,<br>0.0213,<br>0.0281 | 0.011,<br>-0.0064,<br>0.0195,<br>0.0279 | 0.012,<br>0.0005,<br>0.0195,<br>0.028   | 0.021,<br>0.0071,<br>0.0200,<br>0.0282 | 0.082,<br>0.0217,<br>0.0225,<br>0.029  | 0.238,<br>0.0379,<br>0.0253,<br>0.0298 | 0.774,<br>0.0851,<br>0.0288,<br>0.0314 |
| cML-AIC            | 0.920,<br>-0.0921,<br>0.0286,<br>0.023    | 0.509,<br>-0.0428,<br>0.0265,<br>0.0235 | 0.224,<br>-0.0245,<br>0.0265,<br>0.0236 | 0.078,<br>-0.0082,<br>0.0253,<br>0.0239 | 0.069,<br>0.0003,<br>0.0252,<br>0.024   | 0.085,<br>0.0084,<br>0.0259,<br>0.0241 | 0.214,<br>0.0249,<br>0.0280,<br>0.0243 | 0.470,<br>0.0427,<br>0.0297,<br>0.0246 | 0.890,<br>0.0916,<br>0.0317,<br>0.0252 |
| cML-AIC-Profile    | 0.920,<br>-0.0921,<br>0.0287,<br>0.0231   | 0.508,<br>-0.0428,<br>0.0278,<br>0.0235 | 0.222,<br>-0.0245,<br>0.0265,<br>0.0237 | 0.077,<br>-0.0082,<br>0.0253,<br>0.0239 | 0.067,<br>0.0003,<br>0.0252,<br>0.0241  | 0.085,<br>0.0084,<br>0.0259,<br>0.0241 | 0.211,<br>0.0249,<br>0.0280,<br>0.0244 | 0.468,<br>0.0427,<br>0.0297,<br>0.0246 | 0.890,<br>0.0916,<br>0.0317,<br>0.0253 |
| cML-MA-BIC         | 0.992,<br>-0.0997,<br>0.0213,<br>0.0214   | 0.646,<br>-0.0497,<br>0.0217,<br>0.0218 | 0.278,<br>-0.0298,<br>0.0219,<br>0.022  | 0.076,<br>-0.0099,<br>0.0221,<br>0.0222 | 0.045,<br>0.0001,<br>0.0222,<br>0.0223  | 0.070,<br>0.0100,<br>0.0223,<br>0.0224 | 0.260,<br>0.0300,<br>0.0226,<br>0.0226 | 0.581,<br>0.0499,<br>0.0229,<br>0.0229 | 0.984,<br>0.0999,<br>0.0236,<br>0.0235 |
| cML-MA-BIC-Profile | 0.992,<br>-0.0997,<br>0.0213,<br>0.0215   | 0.644,<br>-0.0497,<br>0.0217,<br>0.0218 | 0.275,<br>-0.0298,<br>0.0219,<br>0.022  | 0.074,<br>-0.0099,<br>0.0221,<br>0.0222 | 0.045,<br>0.0001,<br>0.0222,<br>0.0223  | 0.069,<br>0.0100,<br>0.0223,<br>0.0224 | 0.259,<br>0.0300,<br>0.0226,<br>0.0227 | 0.581,<br>0.0499,<br>0.0229,<br>0.0229 | 0.984,<br>0.0999,<br>0.0236,<br>0.0236 |
| cML-BIC            | 0.992,<br>-0.0999,<br>0.0213,<br>0.0212   | 0.654,<br>-0.0499,<br>0.0218,<br>0.0215 | 0.286,<br>-0.0299,<br>0.0220,<br>0.0217 | 0.081,<br>-0.0099,<br>0.0222,<br>0.0219 | 0.050,<br>0.0001,<br>0.0223,<br>0.022   | 0.075,<br>0.0101,<br>0.0225,<br>0.0221 | 0.268,<br>0.0301,<br>0.0227,<br>0.0224 | 0.595,<br>0.0501,<br>0.0230,<br>0.0226 | 0.988,<br>0.1001,<br>0.0237,<br>0.0233 |
| cML-BIC-Profile    | 0.992,<br>-0.0999,<br>0.0213,<br>0.0212   | 0.654,<br>-0.0499,<br>0.0218,<br>0.0216 | 0.284,<br>-0.0299,<br>0.0220,<br>0.0218 | 0.080,<br>-0.0099,<br>0.0222,<br>0.022  | 0.050,<br>0.0001,<br>0.0223,<br>0.0221  | 0.075,<br>0.0101,<br>0.0225,<br>0.0222 | 0.267,<br>0.0301,<br>0.0227,<br>0.0224 | 0.594,<br>0.0501,<br>0.0230,<br>0.0226 | 0.988,<br>0.1001,<br>0.0237,<br>0.0233 |
| MR-Mix             | 0.971,<br>-0.1040,<br>0.0241,<br>0.0273   | 0.502,<br>-0.0511,<br>0.0240,<br>0.027  | 0.197,<br>-0.0303,<br>0.0242,<br>0.027  | 0.053,<br>-0.0100,<br>0.0242,<br>0.0276 | 0.035,<br>-0.0001,<br>0.0243,<br>0.0276 | 0.052,<br>0.0098,<br>0.0243,<br>0.0277 | 0.173,<br>0.0293,<br>0.0243,<br>0.0276 | 0.441,<br>0.0485,<br>0.0243,<br>0.0278 | 0.943,<br>0.0945,<br>0.0243,<br>0.0273 |
| MR-ContMix         | 0.992,<br>-0.0998,<br>0.0225,<br>NA       | 0.667,<br>-0.0497,<br>0.0228,<br>NA     | 0.312,<br>-0.0297,<br>0.0230,<br>NA     | 0.100,<br>-0.0097,<br>0.0232,<br>NA     | 0.071,<br>0.0003,<br>0.0233,<br>NA      | 0.096,<br>0.0103,<br>0.0234,<br>NA     | 0.295,<br>0.0303,<br>0.0236,<br>NA     | 0.607,<br>0.0502,<br>0.0239,<br>NA     | 0.985,<br>0.1001,<br>0.0246,<br>NA     |
| MR-Lasso           | 0.980,<br>-0.0994,<br>0.0224,<br>0.0232   | 0.582,<br>-0.0495,<br>0.0227,<br>0.0236 | 0.244,<br>-0.0296,<br>0.0229,<br>0.0239 | 0.067,<br>-0.0095,<br>0.0232,<br>0.0241 | 0.039,<br>0.0004,<br>0.0234,<br>0.0242  | 0.066,<br>0.0104,<br>0.0235,<br>0.0243 | 0.232,<br>0.0304,<br>0.0236,<br>0.0246 | 0.539,<br>0.0505,<br>0.0239,<br>0.0248 | 0.969,<br>0.1002,<br>0.0250,<br>0.0256 |
| MR-PRESSO          | 0.394,<br>-0.0834,<br>0.3375,<br>0.2048   | 0.256,<br>-0.0338,<br>0.3374,<br>0.2043 | 0.173,<br>-0.0142,<br>0.3373,<br>0.2034 | 0.132,<br>0.0057,<br>0.3373,<br>0.2034  | 0.120,<br>0.0159,<br>0.3373,<br>0.2031  | 0.122,<br>0.0260,<br>0.3373,<br>0.2031 | 0.170,<br>0.0456,<br>0.3368,<br>0.2008 | 0.244,<br>0.0657,<br>0.3363,<br>0.1987 | 0.402,<br>0.1150,<br>0.3353,<br>0.1947 |
| MR-IVW             | 0.108,<br>-0.0857,<br>0.3425,<br>0.3298   | 0.113,<br>-0.0355,<br>0.3425,<br>0.3298 | 0.116,<br>-0.0154,<br>0.3425,<br>0.3298 | 0.120,<br>0.0046,<br>0.3424,<br>0.3298  | 0.119,<br>0.0147,<br>0.3424,<br>0.3298  | 0.122,<br>0.0247,<br>0.3424,<br>0.3298 | 0.120,<br>0.0447,<br>0.3424,<br>0.3298 | 0.121,<br>0.0648,<br>0.3424,<br>0.3297 | 0.113,<br>0.1149,<br>0.3423,<br>0.3297 |
| MR-IVW-Oracle      | 0.989,<br>-0.0997,<br>0.0212,<br>0.0232   | 0.586,<br>-0.0498,<br>0.0216,<br>0.0237 | 0.237,<br>-0.0299,<br>0.0218,<br>0.0239 | 0.059,<br>-0.0099,<br>0.0220,<br>0.0241 | 0.033,<br>0.0001,<br>0.0222,<br>0.0242  | 0.057,<br>0.0101,<br>0.0223,<br>0.0243 | 0.220,<br>0.0300,<br>0.0225,<br>0.0246 | 0.526,<br>0.0500,<br>0.0228,<br>0.0248 | 0.970,<br>0.0998,<br>0.0235,<br>0.0255 |
| MR-Egger           | 0.094,<br>-0.0602,<br>1.9334,<br>1.859    | 0.092,<br>-0.0130,<br>1.9329,<br>1.859  | 0.092,<br>0.0058,<br>1.9327,<br>1.859   | 0.095,<br>0.0246,<br>1.9325,<br>1.859   | 0.095,<br>0.0341,<br>1.9324,<br>1.859   | 0.095,<br>0.0435,<br>1.9323,<br>1.859  | 0.095,<br>0.0623,<br>1.9320,<br>1.859  | 0.095,<br>0.0812,<br>1.9318,<br>1.859  | 0.095,<br>0.1282,<br>1.9314,<br>1.859  |
| MR-Weighted-Median | 0.948,<br>-0.0974,<br>0.0259,<br>0.0271   | 0.436,<br>-0.0483,<br>0.0264,<br>0.0276 | 0.161,<br>-0.0287,<br>0.0266,<br>0.0278 | 0.044,<br>-0.0090,<br>0.0268,<br>0.0281 | 0.043,<br>0.0008,<br>0.0269,<br>0.0282  | 0.052,<br>0.0107,<br>0.0270,<br>0.0284 | 0.181,<br>0.0303,<br>0.0273,<br>0.0287 | 0.411,<br>0.0499,<br>0.0277,<br>0.029  | 0.912,<br>0.0989,<br>0.0287,<br>0.0298 |
| MR-Weighted-Mode   | 0.985,<br>-0.0991,<br>0.0226,<br>0.0234   | 0.563,<br>-0.0496,<br>0.0232,<br>0.0238 | 0.244,<br>-0.0297,<br>0.0234,<br>0.024  | 0.066,<br>-0.0100,<br>0.0235,<br>0.0242 | 0.042,<br>0.0000,<br>0.0235,<br>0.0243  | 0.054,<br>0.0100,<br>0.0236,<br>0.0245 | 0.219,<br>0.0298,<br>0.0239,<br>0.0247 | 0.527,<br>0.0496,<br>0.0245,<br>0.025  | 0.968,<br>0.0990,<br>0.0250,<br>0.0257 |
| MR-RAPS1           | 0.112,<br>-0.0893,<br>0.3355,<br>0.3135   | 0.119,<br>-0.0393,<br>0.3356,<br>0.3135 | 0.123,<br>-0.0193,<br>0.3356,<br>0.3136 | 0.125,<br>0.0007,<br>0.3356,<br>0.3136  | 0.126,<br>0.0107,<br>0.3356,<br>0.3136  | 0.129,<br>0.0207,<br>0.3356,<br>0.3136 | 0.127,<br>0.0407,<br>0.3356,<br>0.3136 | 0.126,<br>0.0607,<br>0.3356,<br>0.3136 | 0.115,<br>0.1106,<br>0.3357,<br>0.3136 |
| MR-RAPS2           | 0.079,<br>-0.0884,<br>0.3207,<br>0.3192   | 0.089,<br>-0.0376,<br>0.3234,<br>0.3238 | 0.095,<br>-0.0200,<br>0.3234,<br>0.3236 | 0.097,<br>-0.0004,<br>0.3248,<br>0.324  | 0.098,<br>0.0090,<br>0.3245,<br>0.3247  | 0.091,<br>0.0212,<br>0.3291,<br>0.3251 | 0.090,<br>0.0389,<br>0.3249,<br>0.3255 | 0.088,<br>0.0607,<br>0.3264,<br>0.3275 | 0.082,<br>0.1090,<br>0.3269,<br>0.3279 |
| MR-RAPS3           | 0.942,<br>-15.7267,<br>585.1517,<br>13300 | 0.916,<br>-0.3338,<br>10.4566,<br>26.03 | 0.908,<br>0.1956,<br>25.4131,<br>45.07  | 0.899,<br>-1.2781,<br>45.5970,<br>116.2 | 0.887,<br>-0.5316,<br>40.8729,<br>182   | 0.891,<br>0.1034,<br>28.1294,<br>39.4  | 0.898,<br>-1.7426,<br>58.0315,<br>1103 | 0.907,<br>0.5672,<br>9.1414,<br>6.23   | 0.926,<br>0.2286,<br>5.0424,<br>2.527  |
| MR-RAPS4           | 0.972,<br>0.8324,<br>1.6647,<br>0.2024    | 0.983,<br>0.7864,<br>1.6293,<br>0.1573  | 0.978,<br>0.7613,<br>1.6436,<br>0.1593  | 0.981,<br>0.7605,<br>1.6142,<br>0.3426  | 0.975,<br>0.7296,<br>1.6157,<br>0.1276  | 0.980,<br>0.7151,<br>1.6501,<br>0.1185 | 0.981,<br>0.6754,<br>1.6321,<br>0.1409 | 0.993,<br>0.5983,<br>1.6471,<br>0.0962 | 0.998,<br>0.4622,<br>1.6313,<br>0.0708 |

Table S34: Main simulations: in each cell, from top to bottom are empirical type-I error/power, mean( $\hat{\theta}$ ), SD( $\hat{\theta}$ ), mean(SE( $\hat{\theta}$ )) when  $m = 10$ , the InSIDE satisfied,  $q = 0.4$ , and  $n = 200000$ .

| Methods \ $\theta$ | -0.1                                      | -0.05                                     | -0.03                                   | -0.01                                     | 0                                        | 0.01                                    | 0.03                                     | 0.05                                   | 0.1                                    |
|--------------------|-------------------------------------------|-------------------------------------------|-----------------------------------------|-------------------------------------------|------------------------------------------|-----------------------------------------|------------------------------------------|----------------------------------------|----------------------------------------|
| cML-MA-AIC         | 0.979,<br>-0.0906,<br>0.0187,<br>0.0203   | 0.557,<br>-0.0409,<br>0.0182,<br>0.0205   | 0.170,<br>-0.0227,<br>0.0165,<br>0.0202 | 0.022,<br>-0.0072,<br>0.0144,<br>0.0198   | 0.013,<br>-0.0003,<br>0.0139,<br>0.0198  | 0.029,<br>0.0066,<br>0.0145,<br>0.0199  | 0.168,<br>0.0220,<br>0.0170,<br>0.0206   | 0.495,<br>0.0399,<br>0.0194,<br>0.0213 | 0.946,<br>0.0889,<br>0.0210,<br>0.0223 |
| cML-MA-AIC-Profile | 0.979,<br>-0.0907,<br>0.0188,<br>0.0203   | 0.556,<br>-0.0410,<br>0.0182,<br>0.0205   | 0.171,<br>-0.0227,<br>0.0165,<br>0.0202 | 0.022,<br>-0.0072,<br>0.0143,<br>0.0198   | 0.013,<br>-0.0004,<br>0.0139,<br>0.0198  | 0.028,<br>0.0066,<br>0.0145,<br>0.0199  | 0.168,<br>0.0220,<br>0.0170,<br>0.0207   | 0.492,<br>0.0399,<br>0.0194,<br>0.0214 | 0.946,<br>0.0890,<br>0.0210,<br>0.0223 |
| cML-AIC            | 0.986,<br>-0.0950,<br>0.0210,<br>0.0163   | 0.739,<br>-0.0450,<br>0.0209,<br>0.0166   | 0.412,<br>-0.0261,<br>0.0200,<br>0.0167 | 0.103,<br>-0.0086,<br>0.0186,<br>0.0169   | 0.068,<br>-0.0005,<br>0.0183,<br>0.0169  | 0.107,<br>0.0075,<br>0.0187,<br>0.0171  | 0.368,<br>0.0250,<br>0.0204,<br>0.0173   | 0.698,<br>0.0439,<br>0.0222,<br>0.0174 | 0.977,<br>0.0937,<br>0.0231,<br>0.0179 |
| cML-AIC-Profile    | 0.986,<br>-0.0950,<br>0.0210,<br>0.0163   | 0.738,<br>-0.0451,<br>0.0209,<br>0.0167   | 0.412,<br>-0.0261,<br>0.0200,<br>0.0168 | 0.103,<br>-0.0086,<br>0.0186,<br>0.0169   | 0.068,<br>-0.0005,<br>0.0183,<br>0.017   | 0.106,<br>0.0075,<br>0.0187,<br>0.0171  | 0.368,<br>0.0250,<br>0.0204,<br>0.0173   | 0.698,<br>0.0439,<br>0.0222,<br>0.0175 | 0.977,<br>0.0937,<br>0.0231,<br>0.018  |
| cML-MA-BIC         | 1.000,<br>-0.1001,<br>0.0152,<br>0.0151   | 0.894,<br>-0.0501,<br>0.0155,<br>0.0154   | 0.516,<br>-0.0301,<br>0.0156,<br>0.0155 | 0.097,<br>-0.0101,<br>0.0157,<br>0.0157   | 0.055,<br>-0.0001,<br>0.0158,<br>0.0158  | 0.101,<br>0.0098,<br>0.0159,<br>0.0158  | 0.466,<br>0.0298,<br>0.0161,<br>0.016    | 0.861,<br>0.0498,<br>0.0163,<br>0.0162 | 1.000,<br>0.0998,<br>0.0168,<br>0.0166 |
| cML-MA-BIC-Profile | 1.000,<br>-0.1001,<br>0.0152,<br>0.0152   | 0.894,<br>-0.0501,<br>0.0155,<br>0.0154   | 0.515,<br>-0.0301,<br>0.0156,<br>0.0156 | 0.097,<br>-0.0101,<br>0.0157,<br>0.0157   | 0.055,<br>-0.0001,<br>0.0158,<br>0.0158  | 0.100,<br>0.0098,<br>0.0159,<br>0.0159  | 0.466,<br>0.0298,<br>0.0161,<br>0.016    | 0.861,<br>0.0498,<br>0.0163,<br>0.0162 | 1.000,<br>0.0998,<br>0.0168,<br>0.0167 |
| cML-BIC            | 1.000,<br>-0.1002,<br>0.0152,<br>0.015    | 0.899,<br>-0.0502,<br>0.0155,<br>0.0153   | 0.525,<br>-0.0302,<br>0.0157,<br>0.0154 | 0.102,<br>-0.0102,<br>0.0158,<br>0.0156   | 0.057,<br>-0.0002,<br>0.0159,<br>0.0156  | 0.103,<br>0.0099,<br>0.0160,<br>0.0157  | 0.473,<br>0.0298,<br>0.0162,<br>0.0159   | 0.863,<br>0.0499,<br>0.0164,<br>0.0161 | 1.000,<br>0.0999,<br>0.0168,<br>0.0165 |
| cML-BIC-Profile    | 1.000,<br>-0.1002,<br>0.0152,<br>0.015    | 0.899,<br>-0.0502,<br>0.0155,<br>0.0153   | 0.524,<br>-0.0302,<br>0.0157,<br>0.0154 | 0.102,<br>-0.0102,<br>0.0158,<br>0.0156   | 0.057,<br>-0.0002,<br>0.0159,<br>0.0157  | 0.102,<br>0.0099,<br>0.0160,<br>0.0157  | 0.473,<br>0.0298,<br>0.0162,<br>0.0159   | 0.863,<br>0.0499,<br>0.0164,<br>0.0161 | 1.000,<br>0.0999,<br>0.0168,<br>0.0165 |
| MR-Mix             | 0.995,<br>-0.1042,<br>0.0170,<br>0.0196   | 0.785,<br>-0.0512,<br>0.0168,<br>0.0196   | 0.348,<br>-0.0305,<br>0.0168,<br>0.0196 | 0.061,<br>-0.0102,<br>0.0169,<br>0.0194   | 0.033,<br>-0.0002,<br>0.0169,<br>0.0193  | 0.061,<br>0.0098,<br>0.0169,<br>0.0193  | 0.337,<br>0.0294,<br>0.0169,<br>0.0192   | 0.725,<br>0.0486,<br>0.0170,<br>0.0192 | 0.998,<br>0.0948,<br>0.0171,<br>0.0193 |
| MR-ContMix         | 1.000,<br>-0.1001,<br>0.0157,<br>NA       | 0.899,<br>-0.0501,<br>0.0159,<br>NA       | 0.547,<br>-0.0301,<br>0.0161,<br>NA     | 0.137,<br>-0.0101,<br>0.0162,<br>NA       | 0.081,<br>-0.0001,<br>0.0163,<br>NA      | 0.121,<br>0.0099,<br>0.0164,<br>NA      | 0.515,<br>0.0299,<br>0.0165,<br>NA       | 0.878,<br>0.0498,<br>0.0167,<br>NA     | 1.000,<br>0.0998,<br>0.0173,<br>NA     |
| MR-Lasso           | 1.000,<br>-0.1002,<br>0.0158,<br>0.0164   | 0.850,<br>-0.0501,<br>0.0159,<br>0.0168   | 0.454,<br>-0.0302,<br>0.0160,<br>0.0169 | 0.092,<br>-0.0102,<br>0.0161,<br>0.0171   | 0.052,<br>-0.0002,<br>0.0163,<br>0.0172  | 0.082,<br>0.0098,<br>0.0163,<br>0.0173  | 0.409,<br>0.0298,<br>0.0165,<br>0.0175   | 0.815,<br>0.0498,<br>0.0167,<br>0.0176 | 0.999,<br>0.0997,<br>0.0171,<br>0.0181 |
| MR-PRESSO          | 0.356,<br>-0.1064,<br>0.3365,<br>0.226    | 0.286,<br>-0.0563,<br>0.3362,<br>0.2244   | 0.195,<br>-0.0364,<br>0.3362,<br>0.2241 | 0.120,<br>-0.0161,<br>0.3361,<br>0.2229   | 0.107,<br>-0.0062,<br>0.3360,<br>0.2225  | 0.110,<br>0.0039,<br>0.3360,<br>0.2226  | 0.172,<br>0.0241,<br>0.3359,<br>0.222    | 0.254,<br>0.0442,<br>0.3359,<br>0.2217 | 0.350,<br>0.0944,<br>0.3356,<br>0.2197 |
| MR-IVW             | 0.103,<br>-0.1078,<br>0.3387,<br>0.3312   | 0.106,<br>-0.0575,<br>0.3386,<br>0.3311   | 0.106,<br>-0.0373,<br>0.3385,<br>0.3311 | 0.108,<br>-0.0172,<br>0.3385,<br>0.3311   | 0.108,<br>-0.0071,<br>0.3385,<br>0.3311  | 0.108,<br>0.0029,<br>0.3384,<br>0.3311  | 0.108,<br>0.0230,<br>0.3384,<br>0.3311   | 0.101,<br>0.0432,<br>0.3384,<br>0.3311 | 0.095,<br>0.0934,<br>0.3383,<br>0.331  |
| MR-IVW-Oracle      | 1.000,<br>-0.1000,<br>0.0151,<br>0.0165   | 0.851,<br>-0.0501,<br>0.0154,<br>0.0168   | 0.447,<br>-0.0301,<br>0.0156,<br>0.0169 | 0.084,<br>-0.0101,<br>0.0157,<br>0.0171   | 0.048,<br>-0.0001,<br>0.0158,<br>0.0172  | 0.078,<br>0.0099,<br>0.0158,<br>0.0172  | 0.411,<br>0.0299,<br>0.0160,<br>0.0174   | 0.820,<br>0.0499,<br>0.0162,<br>0.0176 | 1.000,<br>0.0999,<br>0.0166,<br>0.0181 |
| MR-Egger           | 0.088,<br>-0.1355,<br>1.9662,<br>1.8909   | 0.088,<br>-0.0867,<br>1.9654,<br>1.8908   | 0.087,<br>-0.0672,<br>1.9651,<br>1.8907 | 0.085,<br>-0.0476,<br>1.9648,<br>1.8907   | 0.084,<br>-0.0379,<br>1.9646,<br>1.8906  | 0.083,<br>-0.0281,<br>1.9644,<br>1.8906 | 0.086,<br>-0.0086,<br>1.9644,<br>1.8905  | 0.087,<br>0.0109,<br>1.9638,<br>1.8905 | 0.089,<br>0.0597,<br>1.9630,<br>1.8904 |
| MR-Weighted-Median | 0.999,<br>-0.0996,<br>0.0187,<br>0.0192   | 0.759,<br>-0.0501,<br>0.0190,<br>0.0195   | 0.337,<br>-0.0303,<br>0.0192,<br>0.0197 | 0.070,<br>-0.0105,<br>0.0194,<br>0.0199   | 0.045,<br>-0.0007,<br>0.0195,<br>0.02    | 0.070,<br>0.0092,<br>0.0196,<br>0.0201  | 0.294,<br>0.0290,<br>0.0198,<br>0.0203   | 0.672,<br>0.0487,<br>0.0200,<br>0.0205 | 0.990,<br>0.0981,<br>0.0206,<br>0.0211 |
| MR-Weighted-Mode   | 1.000,<br>-0.0998,<br>0.0165,<br>0.0167   | 0.822,<br>-0.0500,<br>0.0168,<br>0.017    | 0.423,<br>-0.0300,<br>0.0171,<br>0.0171 | 0.084,<br>-0.0101,<br>0.0171,<br>0.0173   | 0.058,<br>-0.0001,<br>0.0172,<br>0.0174  | 0.090,<br>0.0098,<br>0.0173,<br>0.0175  | 0.388,<br>0.0297,<br>0.0174,<br>0.0176   | 0.799,<br>0.0496,<br>0.0176,<br>0.0178 | 1.000,<br>0.0995,<br>0.0182,<br>0.0183 |
| MR-RAPS1           | 0.105,<br>-0.1065,<br>0.3270,<br>0.3145   | 0.116,<br>-0.0565,<br>0.3270,<br>0.3145   | 0.116,<br>-0.0365,<br>0.3270,<br>0.3145 | 0.116,<br>-0.0164,<br>0.3270,<br>0.3145   | 0.117,<br>-0.0064,<br>0.3270,<br>0.3145  | 0.117,<br>0.0036,<br>0.3270,<br>0.3145  | 0.112,<br>0.0236,<br>0.3270,<br>0.3145   | 0.106,<br>0.0436,<br>0.3270,<br>0.3145 | 0.100,<br>0.0936,<br>0.3271,<br>0.3145 |
| MR-RAPS2           | 0.069,<br>-0.1094,<br>0.2086,<br>0.1913   | 0.038,<br>-0.0573,<br>0.2082,<br>0.193    | 0.036,<br>-0.0387,<br>0.2110,<br>0.1936 | 0.035,<br>-0.0184,<br>0.2088,<br>0.1954   | 0.035,<br>-0.0093,<br>0.2095,<br>0.1972  | 0.035,<br>-0.0001,<br>0.2102,<br>0.1985 | 0.036,<br>0.0206,<br>0.2158,<br>0.202    | 0.039,<br>0.0407,<br>0.2213,<br>0.2035 | 0.060,<br>0.0914,<br>0.2214,<br>0.1992 |
| MR-RAPS3           | 0.959,<br>-2.1700,<br>46.0090,<br>67.0966 | 0.933,<br>-0.2074,<br>39.5875,<br>69.0319 | 0.921,<br>0.1424,<br>7.9004,<br>4.7066  | 0.921,<br>1.3643,<br>48.5633,<br>443.2405 | 0.925,<br>0.6899,<br>30.4514,<br>80.3419 | 0.927,<br>0.4231,<br>10.0749,<br>6.9016 | 0.945,<br>-0.0315,<br>10.7542,<br>7.7096 | 0.936,<br>0.1685,<br>5.9607,<br>2.5978 | 0.947,<br>0.3789,<br>3.6643,<br>0.6306 |
| MR-RAPS4           | 1.000,<br>-0.0757,<br>0.1110,<br>0.012    | 0.957,<br>-0.0192,<br>0.1537,<br>0.0123   | 0.720,<br>0.0050,<br>0.1726,<br>0.0125  | 0.309,<br>0.0384,<br>0.2149,<br>0.0149    | 0.276,<br>0.0538,<br>0.2296,<br>0.0137   | 0.321,<br>0.0572,<br>0.2080,<br>0.0133  | 0.671,<br>0.0539,<br>0.1540,<br>0.0129   | 0.940,<br>0.0684,<br>0.1307,<br>0.0129 | 1.000,<br>0.1080,<br>0.0930,<br>0.0131 |



Table S35: Main simulations: in each cell, from top to bottom are empirical type-I error/power, mean( $\hat{\theta}$ ), SD( $\hat{\theta}$ ), mean(SE( $\hat{\theta}$ )) when  $m = 10$ , the InSIDE satisfied,  $q = 0.6$ , and  $n = 50000$ .

| Methods \ $\theta$ | -0.1                                       | -0.05                                    | -0.03                                   | -0.01                                   | 0                                       | 0.01                                     | 0.03                                    | 0.05                                    | 0.1                                     |
|--------------------|--------------------------------------------|------------------------------------------|-----------------------------------------|-----------------------------------------|-----------------------------------------|------------------------------------------|-----------------------------------------|-----------------------------------------|-----------------------------------------|
| cML-MA-AIC         | 0.438,<br>-0.0821,<br>0.0416,<br>0.0468    | 0.100,<br>-0.0375,<br>0.0373,<br>0.0468  | 0.044,<br>-0.0219,<br>0.0348,<br>0.0469 | 0.013,<br>-0.0078,<br>0.0334,<br>0.0472 | 0.012,<br>-0.0006,<br>0.0335,<br>0.0473 | 0.014,<br>0.0064,<br>0.0336,<br>0.0475   | 0.026,<br>0.0206,<br>0.0352,<br>0.0482  | 0.078,<br>0.0360,<br>0.0382,<br>0.0491  | 0.364,<br>0.0806,<br>0.0440,<br>0.0511  |
| cML-MA-AIC-Profile | 0.433,<br>-0.0820,<br>0.0417,<br>0.0472    | 0.098,<br>-0.0374,<br>0.0374,<br>0.0472  | 0.043,<br>-0.0219,<br>0.0351,<br>0.0473 | 0.013,<br>-0.0078,<br>0.0336,<br>0.0476 | 0.012,<br>-0.0005,<br>0.0337,<br>0.0477 | 0.012,<br>0.0065,<br>0.0338,<br>0.048    | 0.025,<br>0.0207,<br>0.0354,<br>0.0487  | 0.077,<br>0.0361,<br>0.0385,<br>0.0495  | 0.361,<br>0.0809,<br>0.0446,<br>0.0517  |
| cML-AIC            | 0.621,<br>-0.0881,<br>0.0479,<br>0.0401    | 0.229,<br>-0.0422,<br>0.0445,<br>0.0407  | 0.119,<br>-0.0251,<br>0.0427,<br>0.0409 | 0.056,<br>-0.0095,<br>0.0416,<br>0.0413 | 0.039,<br>-0.0010,<br>0.0419,<br>0.0415 | 0.042,<br>0.0073,<br>0.0422,<br>0.0418   | 0.098,<br>0.0233,<br>0.0435,<br>0.0423  | 0.202,<br>0.0400,<br>0.0459,<br>0.0427  | 0.553,<br>0.0867,<br>0.0499,<br>0.0439  |
| cML-AIC-Profile    | 0.617,<br>-0.0881,<br>0.0479,<br>0.0403    | 0.227,<br>-0.0422,<br>0.0445,<br>0.0409  | 0.116,<br>-0.0252,<br>0.0428,<br>0.0412 | 0.056,<br>-0.0095,<br>0.0416,<br>0.0416 | 0.038,<br>-0.0010,<br>0.0419,<br>0.0418 | 0.042,<br>0.0073,<br>0.0422,<br>0.0421   | 0.096,<br>0.0233,<br>0.0435,<br>0.0426  | 0.200,<br>0.0400,<br>0.0459,<br>0.0443  | 0.550,<br>0.0869,<br>0.0502,<br>0.0442  |
| cML-MA-BIC         | 0.757,<br>-0.0979,<br>0.0633,<br>0.0378    | 0.254,<br>-0.0480,<br>0.0638,<br>0.0385  | 0.122,<br>-0.0297,<br>0.0373,<br>0.0387 | 0.051,<br>-0.0098,<br>0.0375,<br>0.0391 | 0.041,<br>0.0001,<br>0.0377,<br>0.0393  | 0.041,<br>0.0100,<br>0.0379,<br>0.0395   | 0.111,<br>0.0286,<br>0.0566,<br>0.0403  | 0.249,<br>0.0497,<br>0.0390,<br>0.0403  | 0.686,<br>0.0997,<br>0.0403,<br>0.0414  |
| cML-MA-BIC-Profile | 0.754,<br>-0.0995,<br>0.1231,<br>0.0411    | 0.255,<br>-0.0488,<br>0.1231,<br>0.0416  | 0.124,<br>-0.0276,<br>0.1272,<br>0.0426 | 0.056,<br>-0.0060,<br>0.1212,<br>0.0429 | 0.044,<br>0.0042,<br>0.1225,<br>0.043   | 0.046,<br>0.0143,<br>0.1232,<br>0.0432   | 0.111,<br>0.0346,<br>0.1246,<br>0.0435  | 0.248,<br>0.0549,<br>0.1260,<br>0.044   | 0.680,<br>0.1060,<br>0.1298,<br>0.0455  |
| cML-BIC            | 0.774,<br>-0.0985,<br>0.0642,<br>0.0372    | 0.258,<br>-0.0484,<br>0.0646,<br>0.0379  | 0.126,<br>-0.0300,<br>0.0377,<br>0.0382 | 0.058,<br>-0.0099,<br>0.0381,<br>0.0385 | 0.044,<br>0.0001,<br>0.0382,<br>0.0387  | 0.049,<br>0.0101,<br>0.0385,<br>0.0389   | 0.120,<br>0.0286,<br>0.0644,<br>0.0393  | 0.262,<br>0.0500,<br>0.0395,<br>0.0397  | 0.696,<br>0.1002,<br>0.0406,<br>0.0409  |
| cML-BIC-Profile    | 0.773,<br>-0.0996,<br>0.1275,<br>0.0375    | 0.262,<br>-0.0482,<br>0.1351,<br>0.0381  | 0.131,<br>-0.0266,<br>0.1437,<br>0.0385 | 0.065,<br>-0.0052,<br>0.1371,<br>0.0388 | 0.050,<br>0.0049,<br>0.1371,<br>0.039   | 0.056,<br>0.0149,<br>0.1372,<br>0.0392   | 0.123,<br>0.0349,<br>0.1372,<br>0.0396  | 0.265,<br>0.0548,<br>0.1374,<br>0.04    | 0.693,<br>0.1067,<br>0.1480,<br>0.0412  |
| MR-Mix             | 0.707,<br>-0.1028,<br>0.0389,<br>0.043     | 0.218,<br>-0.0503,<br>0.0387,<br>0.044   | 0.099,<br>-0.0300,<br>0.0384,<br>0.0424 | 0.043,<br>-0.0099,<br>0.0384,<br>0.0423 | 0.035,<br>-0.0001,<br>0.0385,<br>0.0423 | 0.039,<br>0.0097,<br>0.0385,<br>0.0422   | 0.087,<br>0.0289,<br>0.0384,<br>0.0422  | 0.218,<br>0.0479,<br>0.0387,<br>0.0424  | 0.625,<br>0.0936,<br>0.0391,<br>0.0429  |
| MR-ContMix         | 0.786,<br>-0.0998,<br>0.0382,<br>NA        | 0.291,<br>-0.0499,<br>0.0387,<br>NA      | 0.152,<br>-0.0298,<br>0.0389,<br>NA     | 0.069,<br>-0.0099,<br>0.0395,<br>NA     | 0.060,<br>0.0001,<br>0.0397,<br>NA      | 0.072,<br>0.0102,<br>0.0401,<br>NA       | 0.148,<br>0.0299,<br>0.0403,<br>NA      | 0.278,<br>0.0499,<br>0.0409,<br>NA      | 0.713,<br>0.0996,<br>0.0423,<br>NA      |
| MR-Lasso           | 0.703,<br>-0.0857,<br>0.4348,<br>0.0723    | 0.302,<br>-0.0358,<br>0.4330,<br>0.0738  | 0.203,<br>-0.0166,<br>0.4338,<br>0.0744 | 0.154,<br>0.0044,<br>0.4358,<br>0.0741  | 0.146,<br>0.0146,<br>0.4363,<br>0.0743  | 0.151,<br>0.0242,<br>0.4356,<br>0.0744   | 0.200,<br>0.0450,<br>0.4353,<br>0.0749  | 0.296,<br>0.0636,<br>0.4374,<br>0.0754  | 0.631,<br>0.1136,<br>0.4372,<br>0.0768  |
| MR-PRESSO          | 0.226,<br>-0.0997,<br>0.4016,<br>0.2312    | 0.136,<br>-0.0508,<br>0.4012,<br>0.2291  | 0.115,<br>-0.0310,<br>0.4008,<br>0.2277 | 0.101,<br>-0.0114,<br>0.4005,<br>0.2275 | 0.092,<br>-0.0018,<br>0.4005,<br>0.2262 | 0.091,<br>0.0082,<br>0.4003,<br>0.2254   | 0.105,<br>0.0276,<br>0.3999,<br>0.2245  | 0.131,<br>0.0473,<br>0.3995,<br>0.2228  | 0.220,<br>0.0967,<br>0.3991,<br>0.2216  |
| MR-IVW             | 0.088,<br>-0.1052,<br>0.4102,<br>0.4031    | 0.083,<br>-0.0548,<br>0.4102,<br>0.4031  | 0.083,<br>-0.0347,<br>0.4102,<br>0.4031 | 0.084,<br>-0.0145,<br>0.4101,<br>0.4031 | 0.084,<br>-0.0045,<br>0.4101,<br>0.4031 | 0.087,<br>0.0056,<br>0.4101,<br>0.4031   | 0.090,<br>0.0257,<br>0.4101,<br>0.4031  | 0.091,<br>0.0459,<br>0.4101,<br>0.4031  | 0.093,<br>0.0961,<br>0.4100,<br>0.4031  |
| MR-IVW-Oracle      | 0.688,<br>-0.0997,<br>0.0362,<br>0.0414    | 0.220,<br>-0.0498,<br>0.0369,<br>0.0422  | 0.102,<br>-0.0298,<br>0.0373,<br>0.0426 | 0.045,<br>-0.0099,<br>0.0376,<br>0.043  | 0.032,<br>0.0001,<br>0.0378,<br>0.0432  | 0.036,<br>0.0101,<br>0.0380,<br>0.0434   | 0.091,<br>0.0300,<br>0.0384,<br>0.0438  | 0.205,<br>0.0500,<br>0.0389,<br>0.0443  | 0.607,<br>0.0998,<br>0.0401,<br>0.0455  |
| MR-Egger           | 0.098,<br>-0.0259,<br>2.2979,<br>2.164     | 0.098,<br>0.0183,<br>2.2978,<br>2.164    | 0.097,<br>0.0359,<br>2.2978,<br>2.164   | 0.096,<br>0.0536,<br>2.2977,<br>2.164   | 0.097,<br>0.0624,<br>2.2977,<br>2.164   | 0.098,<br>0.0712,<br>2.2977,<br>2.164    | 0.099,<br>0.0888,<br>2.2977,<br>2.164   | 0.099,<br>0.1065,<br>2.2977,<br>2.164   | 0.099,<br>0.1505,<br>2.2977,<br>2.164   |
| MR-Weighted-Median | 0.575,<br>-0.0933,<br>0.0590,<br>0.0462    | 0.191,<br>-0.0467,<br>0.0605,<br>0.047   | 0.093,<br>-0.0281,<br>0.0619,<br>0.0474 | 0.055,<br>-0.0094,<br>0.0635,<br>0.0478 | 0.049,<br>-0.0001,<br>0.0645,<br>0.0481 | 0.051,<br>0.0094,<br>0.0655,<br>0.0483   | 0.089,<br>0.0278,<br>0.0681,<br>0.0489  | 0.168,<br>0.0461,<br>0.0709,<br>0.0494  | 0.493,<br>0.0919,<br>0.0792,<br>0.0511  |
| MR-Weighted-Mode   | 0.542,<br>-0.0841,<br>0.1044,<br>0.0469    | 0.351,<br>-0.0419,<br>0.1062,<br>0.0477  | 0.306,<br>-0.0254,<br>0.1078,<br>0.0482 | 0.291,<br>-0.0083,<br>0.1087,<br>0.0487 | 0.282,<br>0.0001,<br>0.1099,<br>0.049   | 0.298,<br>0.0088,<br>0.1106,<br>0.0494   | 0.321,<br>0.0254,<br>0.1125,<br>0.0501  | 0.363,<br>0.0422,<br>0.1142,<br>0.0508  | 0.508,<br>0.0836,<br>0.1206,<br>0.053   |
| MR-RAPS1           | 0.096,<br>-0.1058,<br>0.4038,<br>0.3858    | 0.099,<br>-0.0557,<br>0.4038,<br>0.3859  | 0.098,<br>-0.0356,<br>0.4038,<br>0.3859 | 0.098,<br>-0.0156,<br>0.4038,<br>0.3859 | 0.099,<br>-0.0056,<br>0.4039,<br>0.3859 | 0.100,<br>0.0044,<br>0.4039,<br>0.3859   | 0.101,<br>0.0245,<br>0.4039,<br>0.3859  | 0.102,<br>0.0445,<br>0.4039,<br>0.386   | 0.112,<br>0.0946,<br>0.4040,<br>0.386   |
| MR-RAPS2           | 0.105,<br>-0.1042,<br>0.4391,<br>0.4183    | 0.103,<br>-0.0558,<br>0.4367,<br>0.4189  | 0.111,<br>-0.0349,<br>0.4374,<br>0.4177 | 0.112,<br>-0.0165,<br>0.4373,<br>0.4186 | 0.110,<br>-0.0048,<br>0.4382,<br>0.419  | 0.111,<br>0.0055,<br>0.4370,<br>0.419    | 0.111,<br>0.0259,<br>0.4399,<br>0.4189  | 0.111,<br>0.0454,<br>0.4368,<br>0.4191  | 0.123,<br>0.0965,<br>0.4469,<br>0.4183  |
| MR-RAPS3           | 0.884,<br>63.3358,<br>2058.7795,<br>128300 | 0.875,<br>-4.0102,<br>151.7719,<br>794.4 | 0.866,<br>4.2910,<br>146.2623,<br>1424  | 0.874,<br>1.5637,<br>43.2247,<br>75.2   | 0.882,<br>0.8245,<br>26.2799,<br>33.74  | 0.885,<br>-2.7847,<br>109.0332,<br>475.1 | 0.886,<br>-4.4656,<br>86.2928,<br>335.6 | 0.886,<br>0.4654,<br>12.9018,<br>7.783  | 0.896,<br>0.3751,<br>36.3773,<br>60.93  |
| MR-RAPS4           | 0.988,<br>0.3407,<br>1.5671,<br>0.1651     | 0.988,<br>0.2469,<br>1.6003,<br>0.2481   | 0.980,<br>0.2280,<br>1.6874,<br>0.1746  | 0.983,<br>0.1159,<br>1.7280,<br>0.2294  | 0.976,<br>0.0777,<br>1.8078,<br>0.1743  | 0.978,<br>0.0733,<br>1.7938,<br>0.1889   | 0.982,<br>-0.0743,<br>1.7813,<br>0.335  | 0.981,<br>-0.1083,<br>1.7991,<br>0.1873 | 0.975,<br>-0.4070,<br>1.8125,<br>0.2485 |

Table S36: Main simulations: in each cell, from top to bottom are empirical type-I error/power, mean( $\hat{\theta}$ ), SD( $\hat{\theta}$ ), mean(SE( $\hat{\theta}$ )) when  $m = 10$ , the InSIDE satisfied,  $q = 0.6$ , and  $n = 100000$ .

| Methods \ $\theta$ | -0.1                                     | -0.05                                        | -0.03                                      | -0.01                                      | 0                                         | 0.01                                     | 0.03                                       | 0.05                                      | 0.1                                       |
|--------------------|------------------------------------------|----------------------------------------------|--------------------------------------------|--------------------------------------------|-------------------------------------------|------------------------------------------|--------------------------------------------|-------------------------------------------|-------------------------------------------|
| cML-MA-AIC         | 0.725,<br>-0.0854,<br>0.0307,<br>0.0333  | 0.197,<br>-0.0374,<br>0.0279,<br>0.0336      | 0.062,<br>-0.0208,<br>0.0256,<br>0.0336    | 0.011,<br>-0.0061,<br>0.0239,<br>0.0336    | 0.012,<br>0.0007,<br>0.0244,<br>0.0341    | 0.020,<br>0.0074,<br>0.0249,<br>0.0342   | 0.070,<br>0.0216,<br>0.0276,<br>0.0347     | 0.187,<br>0.0382,<br>0.0301,<br>0.0354    | 0.677,<br>0.0860,<br>0.0333,<br>0.0366    |
| cML-MA-AIC-Profile | 0.723,<br>-0.0857,<br>0.0317,<br>0.034   | 0.197,<br>-0.0376,<br>0.0287,<br>0.0343      | 0.062,<br>-0.0209,<br>0.0263,<br>0.0344    | 0.010,<br>-0.0062,<br>0.0246,<br>0.0343    | 0.011,<br>0.0009,<br>0.0247,<br>0.0344    | 0.020,<br>0.0075,<br>0.0252,<br>0.0345   | 0.070,<br>0.0217,<br>0.0280,<br>0.0351     | 0.187,<br>0.0384,<br>0.0306,<br>0.0358    | 0.676,<br>0.0863,<br>0.0340,<br>0.037     |
| cML-AIC            | 0.825,<br>-0.0896,<br>0.0345,<br>0.0283  | 0.372,<br>-0.0409,<br>0.0326,<br>0.0289      | 0.165,<br>-0.0230,<br>0.0313,<br>0.0292    | 0.060,<br>-0.0071,<br>0.0302,<br>0.0294    | 0.046,<br>0.0012,<br>0.0303,<br>0.0295    | 0.072,<br>0.0090,<br>0.0307,<br>0.0296   | 0.168,<br>0.0244,<br>0.0330,<br>0.0298     | 0.338,<br>0.0425,<br>0.0348,<br>0.0302    | 0.811,<br>0.0912,<br>0.0372,<br>0.0311    |
| cML-AIC-Profile    | 0.825,<br>-0.0896,<br>0.0345,<br>0.0284  | 0.368,<br>-0.0409,<br>0.0326,<br>0.029       | 0.165,<br>-0.0231,<br>0.0314,<br>0.0293    | 0.060,<br>-0.0071,<br>0.0302,<br>0.0295    | 0.046,<br>0.0012,<br>0.0303,<br>0.0296    | 0.072,<br>0.0090,<br>0.0307,<br>0.0297   | 0.166,<br>0.0244,<br>0.0330,<br>0.0299     | 0.336,<br>0.0425,<br>0.0349,<br>0.0303    | 0.810,<br>0.0912,<br>0.0372,<br>0.0312    |
| cML-MA-BIC         | 0.959,<br>-0.0994,<br>0.0263,<br>0.0266  | 0.468,<br>-0.0495,<br>0.0268,<br>0.027       | 0.191,<br>-0.0296,<br>0.0270,<br>0.0273    | 0.064,<br>-0.0097,<br>0.0272,<br>0.0276    | 0.048,<br>-0.0013,<br>0.0535,<br>0.0277   | 0.073,<br>0.0087,<br>0.0536,<br>0.0278   | 0.197,<br>0.0285,<br>0.0538,<br>0.0281     | 0.415,<br>0.0484,<br>0.0540,<br>0.0284    | 0.936,<br>0.0984,<br>0.0546,<br>0.0292    |
| cML-MA-BIC-Profile | 0.958,<br>-0.1011,<br>0.1011,<br>0.0276  | 0.465,<br>-0.0494,<br>0.0861,<br>0.0279      | 0.193,<br>-0.0294,<br>0.0860,<br>0.0282    | 0.064,<br>-0.0094,<br>0.0860,<br>0.0285    | 0.049,<br>0.0006,<br>0.0860,<br>0.0287    | 0.074,<br>0.0106,<br>0.0861,<br>0.0288   | 0.196,<br>0.0306,<br>0.0866,<br>0.0292     | 0.409,<br>0.0507,<br>0.0873,<br>0.0296    | 0.932,<br>0.1012,<br>0.0910,<br>0.0305    |
| cML-BIC            | 0.960,<br>-0.0997,<br>0.0263,<br>0.0263  | 0.477,<br>-0.0498,<br>0.0269,<br>0.0268      | 0.199,<br>-0.0298,<br>0.0271,<br>0.027     | 0.068,<br>-0.0098,<br>0.0274,<br>0.0273    | 0.049,<br>-0.0013,<br>0.0537,<br>0.0274   | 0.076,<br>0.0087,<br>0.0537,<br>0.0275   | 0.202,<br>0.0286,<br>0.0539,<br>0.0278     | 0.427,<br>0.0486,<br>0.0541,<br>0.0281    | 0.939,<br>0.0986,<br>0.0546,<br>0.0289    |
| cML-BIC-Profile    | 0.961,<br>-0.1008,<br>0.1006,<br>0.0264  | 0.475,<br>-0.0492,<br>0.0846,<br>0.0269      | 0.200,<br>-0.0292,<br>0.0848,<br>0.0271    | 0.070,<br>-0.0092,<br>0.0849,<br>0.0274    | 0.050,<br>0.0008,<br>0.0850,<br>0.0275    | 0.077,<br>0.0108,<br>0.0850,<br>0.0276   | 0.203,<br>0.0308,<br>0.0852,<br>0.0279     | 0.425,<br>0.0507,<br>0.0853,<br>0.0282    | 0.938,<br>0.1025,<br>0.1028,<br>0.029     |
| MR-Mix             | 0.930,<br>-0.1028,<br>0.0279,<br>0.0299  | 0.419,<br>-0.0502,<br>0.0279,<br>0.0297      | 0.160,<br>-0.0298,<br>0.0279,<br>0.0298    | 0.053,<br>-0.0097,<br>0.0279,<br>0.0298    | 0.046,<br>0.0002,<br>0.0280,<br>0.0298    | 0.061,<br>0.0099,<br>0.0280,<br>0.0299   | 0.162,<br>0.0291,<br>0.0280,<br>0.03       | 0.357,<br>0.0480,<br>0.0281,<br>0.0299    | 0.893,<br>0.0940,<br>0.0284,<br>0.0301    |
| MR-ContMix         | 0.958,<br>-0.0992,<br>0.0270,<br>NA      | 0.525,<br>-0.0494,<br>0.0274,<br>NA          | 0.236,<br>-0.0296,<br>0.0279,<br>NA        | 0.094,<br>-0.0097,<br>0.0284,<br>NA        | 0.069,<br>0.0004,<br>0.0285,<br>NA        | 0.094,<br>0.0103,<br>0.0286,<br>NA       | 0.249,<br>0.0302,<br>0.0290,<br>NA         | 0.467,<br>0.0502,<br>0.0294,<br>NA        | 0.939,<br>0.1001,<br>0.0303,<br>NA        |
| MR-Lasso           | 0.901,<br>-0.0983,<br>0.4216,<br>0.059   | 0.465,<br>-0.0476,<br>0.4222,<br>0.0593      | 0.253,<br>-0.0279,<br>0.4218,<br>0.0593    | 0.159,<br>-0.0083,<br>0.4232,<br>0.0594    | 0.141,<br>0.0021,<br>0.4220,<br>0.0592    | 0.161,<br>0.0125,<br>0.4234,<br>0.0596   | 0.263,<br>0.0323,<br>0.4241,<br>0.0596     | 0.423,<br>0.0524,<br>0.4240,<br>0.06      | 0.880,<br>0.1026,<br>0.4253,<br>0.0605    |
| MR-PRESSO          | 0.251,<br>-0.0992,<br>0.3925,<br>0.2742  | 0.135,<br>-0.0490,<br>0.3924,<br>0.2727      | 0.099,<br>-0.0288,<br>0.3923,<br>0.2723    | 0.081,<br>-0.0089,<br>0.3923,<br>0.2716    | 0.080,<br>0.0010,<br>0.3923,<br>0.2712    | 0.079,<br>0.0112,<br>0.3922,<br>0.2709   | 0.090,<br>0.0310,<br>0.3922,<br>0.2703     | 0.138,<br>0.0507,<br>0.3920,<br>0.2689    | 0.254,<br>0.0992,<br>0.3916,<br>0.2662    |
| MR-IVW             | 0.087,<br>-0.1006,<br>0.3958,<br>0.4046  | 0.080,<br>-0.0501,<br>0.3958,<br>0.4046      | 0.079,<br>-0.0299,<br>0.3958,<br>0.4046    | 0.077,<br>-0.0098,<br>0.3958,<br>0.4046    | 0.077,<br>0.0003,<br>0.3958,<br>0.4046    | 0.077,<br>0.0104,<br>0.3958,<br>0.4046   | 0.075,<br>0.0305,<br>0.3958,<br>0.4046     | 0.080,<br>0.0507,<br>0.3957,<br>0.4045    | 0.089,<br>0.1010,<br>0.3957,<br>0.4045    |
| MR-IVW-Oracle      | 0.919,<br>-0.0995,<br>0.0262,<br>0.0292  | 0.406,<br>-0.0496,<br>0.0268,<br>0.0298      | 0.162,<br>-0.0297,<br>0.0270,<br>0.03      | 0.055,<br>-0.0097,<br>0.0273,<br>0.0303    | 0.039,<br>0.0003,<br>0.0274,<br>0.0304    | 0.057,<br>0.0102,<br>0.0276,<br>0.0306   | 0.166,<br>0.0302,<br>0.0279,<br>0.0309     | 0.361,<br>0.0501,<br>0.0282,<br>0.0312    | 0.885,<br>0.1000,<br>0.0291,<br>0.032     |
| MR-Egger           | 0.088,<br>-0.0091,<br>2.3970,<br>2.2796  | 0.086,<br>0.0379,<br>2.3968,<br>2.2795       | 0.086,<br>0.0567,<br>2.3967,<br>2.2794     | 0.086,<br>0.0755,<br>2.3966,<br>2.2794     | 0.085,<br>0.0849,<br>2.3966,<br>2.2794    | 0.085,<br>0.0943,<br>2.3965,<br>2.2794   | 0.087,<br>0.1130,<br>2.3964,<br>2.2793     | 0.088,<br>0.1318,<br>2.3964,<br>2.2793    | 0.090,<br>0.1787,<br>2.3962,<br>2.2793    |
| MR-Weighted-Median | 0.822,<br>-0.0956,<br>0.0335,<br>0.0327  | 0.339,<br>-0.0476,<br>0.0343,<br>0.0332      | 0.151,<br>-0.0283,<br>0.0347,<br>0.0335    | 0.057,<br>-0.0091,<br>0.0352,<br>0.0338    | 0.045,<br>0.0003,<br>0.0355,<br>0.0339    | 0.065,<br>0.0100,<br>0.0359,<br>0.0341   | 0.162,<br>0.0291,<br>0.0367,<br>0.0345     | 0.312,<br>0.0483,<br>0.0377,<br>0.0349    | 0.777,<br>0.0956,<br>0.0425,<br>0.0361    |
| MR-Weighted-Mode   | 0.670,<br>-0.0826,<br>0.0899,<br>0.0335  | 0.459,<br>-0.0392,<br>0.0909,<br>0.0341      | 0.417,<br>-0.0225,<br>0.0921,<br>0.0344    | 0.392,<br>-0.0053,<br>0.0935,<br>0.0348    | 0.392,<br>0.0033,<br>0.0944,<br>0.035     | 0.386,<br>0.0118,<br>0.0950,<br>0.0352   | 0.458,<br>0.0290,<br>0.0968,<br>0.0357     | 0.514,<br>0.0461,<br>0.0988,<br>0.0362    | 0.673,<br>0.0884,<br>0.1051,<br>0.0377    |
| MR-RAPS1           | 0.091,<br>-0.0999,<br>0.3860,<br>0.3857  | 0.080,<br>-0.0499,<br>0.3860,<br>0.3857      | 0.078,<br>-0.0299,<br>0.3860,<br>0.3858    | 0.076,<br>-0.0099,<br>0.3861,<br>0.3858    | 0.077,<br>0.0001,<br>0.3861,<br>0.3858    | 0.078,<br>0.0101,<br>0.3861,<br>0.3858   | 0.083,<br>0.0301,<br>0.3861,<br>0.3858     | 0.093,<br>0.0501,<br>0.3862,<br>0.3858    | 0.097,<br>0.1002,<br>0.3862,<br>0.3858    |
| MR-RAPS2           | 0.135,<br>-0.1038,<br>0.5051,<br>0.4046  | 0.121,<br>-0.0380,<br>0.4751,<br>0.408       | 0.116,<br>-0.0207,<br>0.4889,<br>0.4078    | 0.131,<br>-0.0120,<br>0.4854,<br>0.4057    | 0.128,<br>0.0058,<br>0.4772,<br>0.4081    | 0.127,<br>0.0138,<br>0.4746,<br>0.4076   | 0.131,<br>0.0278,<br>0.4822,<br>0.4094     | 0.128,<br>0.0490,<br>0.4713,<br>0.4106    | 0.135,<br>0.0976,<br>0.4618,<br>0.4109    |
| MR-RAPS3           | 0.923,<br>0.8567,<br>30.6220,<br>30.4642 | 0.907,<br>-6.2997,<br>193.5672,<br>1076.2517 | 0.908,<br>4.0412,<br>104.8374,<br>348.2075 | 0.905,<br>1.2127,<br>130.9044,<br>593.1527 | 0.902,<br>-1.5129,<br>46.1664,<br>73.9518 | 0.903,<br>0.0637,<br>41.6720,<br>51.7658 | 0.910,<br>-1.9248,<br>71.7011,<br>140.9863 | 0.906,<br>-2.4762,<br>61.1978,<br>144.338 | 0.916,<br>0.6197,<br>56.7985,<br>162.8748 |
| MR-RAPS4           | 0.997,<br>0.6986,<br>1.5290,<br>0.1044   | 0.994,<br>0.5614,<br>1.7044,<br>0.1188       | 0.992,<br>0.4942,<br>1.7518,<br>0.1268     | 0.986,<br>0.4093,<br>1.7620,<br>0.1576     | 0.989,<br>0.3672,<br>1.7635,<br>0.146     | 0.989,<br>0.3656,<br>1.7845,<br>0.1926   | 0.983,<br>0.1688,<br>1.8126,<br>0.228      | 0.983,<br>0.1251,<br>1.8405,<br>0.2136    | 0.987,<br>-0.0863,<br>1.8639,<br>0.147    |

Table S37: Main simulations: in each cell, from top to bottom are empirical type-I error/power, mean( $\hat{\theta}$ ), SD( $\hat{\theta}$ ), mean(SE( $\hat{\theta}$ )) when  $m = 10$ , the InSIDE satisfied,  $q = 0.6$ , and  $n = 200000$ .

| Methods \ $\theta$ | -0.1                                    | -0.05                                   | -0.03                                    | -0.01                                   | 0                                       | 0.01                                    | 0.03                                   | 0.05                                    | 0.1                                    |
|--------------------|-----------------------------------------|-----------------------------------------|------------------------------------------|-----------------------------------------|-----------------------------------------|-----------------------------------------|----------------------------------------|-----------------------------------------|----------------------------------------|
| cML-MA-AIC         | 0.949,<br>-0.0915,<br>0.0225,<br>0.0235 | 0.434,<br>-0.0417,<br>0.0221,<br>0.0238 | 0.156,<br>-0.0233,<br>0.0203,<br>0.0238  | 0.025,<br>-0.0076,<br>0.0180,<br>0.0237 | 0.019,<br>-0.0007,<br>0.0177,<br>0.0238 | 0.024,<br>0.0062,<br>0.0180,<br>0.0239  | 0.137,<br>0.0216,<br>0.0203,<br>0.0246 | 0.366,<br>0.0395,<br>0.0224,<br>0.0251  | 0.904,<br>0.0882,<br>0.0249,<br>0.0259 |
| cML-MA-AIC-Profile | 0.949,<br>-0.0916,<br>0.0226,<br>0.0235 | 0.433,<br>-0.0417,<br>0.0221,<br>0.0238 | 0.155,<br>-0.0233,<br>0.0203,<br>0.0239  | 0.025,<br>-0.0076,<br>0.0180,<br>0.0237 | 0.018,<br>-0.0007,<br>0.0177,<br>0.0238 | 0.024,<br>0.0062,<br>0.0180,<br>0.0239  | 0.136,<br>0.0216,<br>0.0203,<br>0.0246 | 0.366,<br>0.0395,<br>0.0224,<br>0.0251  | 0.904,<br>0.0882,<br>0.0249,<br>0.0259 |
| cML-AIC            | 0.960,<br>-0.0942,<br>0.0254,<br>0.0201 | 0.617,<br>-0.0446,<br>0.0239,<br>0.0204 | 0.306,<br>-0.0256,<br>0.0239,<br>0.0206  | 0.083,<br>-0.0085,<br>0.0222,<br>0.0208 | 0.057,<br>-0.0008,<br>0.0220,<br>0.0208 | 0.076,<br>0.0067,<br>0.0224,<br>0.021   | 0.266,<br>0.0238,<br>0.0241,<br>0.0212 | 0.539,<br>0.0423,<br>0.0256,<br>0.0215  | 0.924,<br>0.0912,<br>0.0280,<br>0.0221 |
| cML-AIC-Profile    | 0.960,<br>-0.0943,<br>0.0255,<br>0.0201 | 0.617,<br>-0.0446,<br>0.0251,<br>0.0204 | 0.305,<br>-0.0256,<br>0.0239,<br>0.0206  | 0.082,<br>-0.0085,<br>0.0222,<br>0.0207 | 0.057,<br>-0.0008,<br>0.0220,<br>0.0209 | 0.076,<br>0.0067,<br>0.0224,<br>0.021   | 0.266,<br>0.0238,<br>0.0241,<br>0.0213 | 0.538,<br>0.0423,<br>0.0256,<br>0.0215  | 0.924,<br>0.0912,<br>0.0280,<br>0.0221 |
| cML-MA-BIC         | 0.999,<br>-0.1009,<br>0.0194,<br>0.0188 | 0.762,<br>-0.0508,<br>0.0197,<br>0.0191 | 0.372,<br>-0.0308,<br>0.0198,<br>0.0193  | 0.086,<br>-0.0108,<br>0.0199,<br>0.0194 | 0.056,<br>-0.0009,<br>0.0199,<br>0.0195 | 0.085,<br>0.0091,<br>0.0200,<br>0.0196  | 0.326,<br>0.0290,<br>0.0203,<br>0.0198 | 0.670,<br>0.0490,<br>0.0205,<br>0.02    | 0.992,<br>0.0991,<br>0.0210,<br>0.0206 |
| cML-MA-BIC-Profile | 0.999,<br>-0.1009,<br>0.0194,<br>0.0188 | 0.762,<br>-0.0508,<br>0.0197,<br>0.0191 | 0.369,<br>-0.0308,<br>0.0198,<br>0.0193  | 0.085,<br>-0.0108,<br>0.0199,<br>0.0195 | 0.056,<br>-0.0009,<br>0.0199,<br>0.0195 | 0.085,<br>0.0091,<br>0.0200,<br>0.0196  | 0.326,<br>0.0290,<br>0.0203,<br>0.0198 | 0.669,<br>0.0490,<br>0.0205,<br>0.02    | 0.992,<br>0.0991,<br>0.0210,<br>0.0206 |
| cML-BIC            | 1.000,<br>-0.1010,<br>0.0194,<br>0.0187 | 0.767,<br>-0.0509,<br>0.0196,<br>0.019  | 0.375,<br>-0.0309,<br>0.0198,<br>0.0191  | 0.089,<br>-0.0109,<br>0.0199,<br>0.0193 | 0.058,<br>-0.0009,<br>0.0200,<br>0.0194 | 0.088,<br>0.0091,<br>0.0201,<br>0.0195  | 0.331,<br>0.0292,<br>0.0203,<br>0.0197 | 0.678,<br>0.0492,<br>0.0205,<br>0.0199  | 0.993,<br>0.0993,<br>0.0210,<br>0.0205 |
| cML-BIC-Profile    | 1.000,<br>-0.1010,<br>0.0194,<br>0.0187 | 0.767,<br>-0.0509,<br>0.0196,<br>0.019  | 0.374,<br>-0.0309,<br>0.0198,<br>0.0192  | 0.088,<br>-0.0109,<br>0.0199,<br>0.0193 | 0.058,<br>-0.0009,<br>0.0200,<br>0.0194 | 0.088,<br>0.0091,<br>0.0201,<br>0.0195  | 0.331,<br>0.0292,<br>0.0203,<br>0.0197 | 0.677,<br>0.0492,<br>0.0205,<br>0.0199  | 0.993,<br>0.0993,<br>0.0210,<br>0.0205 |
| MR-Mix             | 0.997,<br>-0.1042,<br>0.0205,<br>0.0214 | 0.705,<br>-0.0516,<br>0.0206,<br>0.0212 | 0.318,<br>-0.0310,<br>0.0207,<br>0.0212  | 0.069,<br>-0.0108,<br>0.0207,<br>0.0212 | 0.048,<br>-0.0009,<br>0.0207,<br>0.0212 | 0.069,<br>0.0089,<br>0.0208,<br>0.0212  | 0.282,<br>0.0283,<br>0.0206,<br>0.0212 | 0.601,<br>0.0472,<br>0.0205,<br>0.0213  | 0.985,<br>0.0930,<br>0.0207,<br>0.0214 |
| MR-ContMix         | 0.999,<br>-0.1009,<br>0.0197,<br>NA     | 0.791,<br>-0.0509,<br>0.0200,<br>NA     | 0.423,<br>-0.0309,<br>0.0201,<br>NA      | 0.117,<br>-0.0109,<br>0.0203,<br>NA     | 0.085,<br>-0.0009,<br>0.0204,<br>NA     | 0.115,<br>0.0091,<br>0.0205,<br>NA      | 0.388,<br>0.0291,<br>0.0206,<br>NA     | 0.709,<br>0.0491,<br>0.0209,<br>NA      | 0.992,<br>0.0991,<br>0.0214,<br>NA     |
| MR-Lasso           | 0.963,<br>-0.0991,<br>0.4737,<br>0.0564 | 0.708,<br>-0.0476,<br>0.4753,<br>0.0561 | 0.395,<br>-0.0285,<br>0.4741,<br>0.0561  | 0.208,<br>-0.0080,<br>0.4744,<br>0.056  | 0.181,<br>0.0024,<br>0.4747,<br>0.0563  | 0.201,<br>0.0131,<br>0.4752,<br>0.0564  | 0.367,<br>0.0337,<br>0.4750,<br>0.057  | 0.649,<br>0.0539,<br>0.4753,<br>0.0571  | 0.955,<br>1.056,<br>0.4766,<br>0.058   |
| MR-PRESSO          | 0.227,<br>-0.1135,<br>0.4187,<br>0.3124 | 0.129,<br>-0.0627,<br>0.4185,<br>0.3112 | 0.097,<br>-0.0425,<br>0.4185,<br>0.3109  | 0.067,<br>-0.0226,<br>0.4184,<br>0.3106 | 0.068,<br>-0.0125,<br>0.4184,<br>0.3106 | 0.069,<br>-0.0025,<br>0.4184,<br>0.3103 | 0.085,<br>0.0176,<br>0.4183,<br>0.3103 | 0.131,<br>0.0377,<br>0.4183,<br>0.3103  | 0.222,<br>0.0881,<br>0.4181,<br>0.3076 |
| MR-IVW             | 0.089,<br>-0.1143,<br>0.4198,<br>0.4009 | 0.088,<br>-0.0638,<br>0.4197,<br>0.4009 | 0.089,<br>-0.0436,<br>0.4196,<br>0.4009  | 0.095,<br>-0.0234,<br>0.4196,<br>0.4008 | 0.100,<br>-0.0133,<br>0.4196,<br>0.4008 | 0.099,<br>-0.0032,<br>0.4196,<br>0.4008 | 0.096,<br>0.0170,<br>0.4195,<br>0.4008 | 0.097,<br>0.0372,<br>0.4195,<br>0.4008  | 0.105,<br>0.0876,<br>0.4194,<br>0.4008 |
| MR-IVW-Oracle      | 0.996,<br>-0.1008,<br>0.0193,<br>0.0207 | 0.688,<br>-0.0508,<br>0.0196,<br>0.0211 | 0.306,<br>-0.0308,<br>0.0198,<br>0.0213  | 0.073,<br>-0.0108,<br>0.0199,<br>0.0215 | 0.045,<br>-0.0008,<br>0.0200,<br>0.0216 | 0.068,<br>0.0092,<br>0.0201,<br>0.0217  | 0.267,<br>0.0292,<br>0.0203,<br>0.0219 | 0.607,<br>0.0492,<br>0.0205,<br>0.0222  | 0.986,<br>0.0992,<br>0.0210,<br>0.0228 |
| MR-Egger           | 0.079,<br>-0.1149,<br>2.3920,<br>2.295  | 0.079,<br>-0.0662,<br>2.3914,<br>2.295  | 0.079,<br>-0.0468,<br>2.3912,<br>2.295   | 0.079,<br>-0.0273,<br>2.3908,<br>2.295  | 0.079,<br>-0.0176,<br>2.3908,<br>2.295  | 0.080,<br>-0.0078,<br>2.3907,<br>2.295  | 0.080,<br>0.0116,<br>2.3907,<br>2.295  | 0.080,<br>0.0310,<br>2.3903,<br>2.295   | 0.081,<br>0.0796,<br>2.3898,<br>2.295  |
| MR-Weighted-Median | 0.969,<br>-0.0985,<br>0.0258,<br>0.0233 | 0.591,<br>-0.0499,<br>0.0265,<br>0.0236 | 0.285,<br>-0.0305,<br>0.0270,<br>0.0238  | 0.076,<br>-0.0112,<br>0.0278,<br>0.0241 | 0.065,<br>-0.0015,<br>0.0282,<br>0.0242 | 0.086,<br>0.0082,<br>0.0287,<br>0.0243  | 0.239,<br>0.0275,<br>0.0298,<br>0.0247 | 0.523,<br>0.0469,<br>0.0312,<br>0.0251  | 0.937,<br>0.0948,<br>0.0352,<br>0.0263 |
| MR-Weighted-Mode   | 0.786,<br>-0.0894,<br>0.0842,<br>0.0241 | 0.599,<br>-0.0465,<br>0.0856,<br>0.0246 | 0.550,<br>-0.0287,<br>0.0865,<br>0.0248  | 0.535,<br>-0.0119,<br>0.0878,<br>0.0251 | 0.527,<br>-0.0030,<br>0.0882,<br>0.0252 | 0.519,<br>0.0057,<br>0.0891,<br>0.0254  | 0.550,<br>0.0229,<br>0.0908,<br>0.0258 | 0.586,<br>0.0404,<br>0.0926,<br>0.0261  | 0.722,<br>0.0817,<br>0.0985,<br>0.0272 |
| MR-RAPS1           | 0.108,<br>-0.1113,<br>0.4084,<br>0.3813 | 0.106,<br>-0.0612,<br>0.4084,<br>0.3813 | 0.104,<br>-0.0412,<br>0.4084,<br>0.3814  | 0.098,<br>-0.0212,<br>0.4084,<br>0.3814 | 0.097,<br>-0.0112,<br>0.4084,<br>0.3814 | 0.100,<br>-0.0012,<br>0.4084,<br>0.3814 | 0.100,<br>0.0188,<br>0.4084,<br>0.3814 | 0.100,<br>0.0388,<br>0.4084,<br>0.3814  | 0.113,<br>0.0888,<br>0.4083,<br>0.3814 |
| MR-RAPS2           | 0.275,<br>-0.1105,<br>0.6861,<br>0.2873 | 0.245,<br>-0.0540,<br>0.6572,<br>0.2963 | 0.237,<br>-0.0308,<br>0.6357,<br>0.3002  | 0.244,<br>-0.0168,<br>0.6418,<br>0.3003 | 0.224,<br>0.0039,<br>0.6283,<br>0.3083  | 0.236,<br>0.0008,<br>0.6400,<br>0.3106  | 0.228,<br>0.0170,<br>0.6296,<br>0.3108 | 0.224,<br>0.0563,<br>0.6160,<br>0.3171  | 0.228,<br>0.0987,<br>0.5859,<br>0.331  |
| MR-RAPS3           | 0.943,<br>-1.4311,<br>34.1674,<br>27.9  | 0.943,<br>-0.0468,<br>32.6704,<br>22.82 | 0.941,<br>27.5745,<br>921.1527,<br>16430 | 0.929,<br>-0.4064,<br>32.4517,<br>25.7  | 0.934,<br>3.4743,<br>138.5109,<br>321.6 | 0.937,<br>-3.0060,<br>88.5082,<br>181.1 | 0.941,<br>3.5392,<br>70.1783,<br>119.4 | 0.948,<br>6.9374,<br>157.8841,<br>569.6 | 0.944,<br>4.2169,<br>73.4382,<br>161.5 |
| MR-RAPS4           | 1.000,<br>-0.1495,<br>0.4334,<br>0.015  | 0.993,<br>0.3332,<br>1.3073,<br>0.0453  | 0.976,<br>0.3997,<br>1.3479,<br>0.0858   | 0.960,<br>0.3748,<br>1.3709,<br>0.0988  | 0.985,<br>0.5552,<br>1.8731,<br>0.2677  | 0.947,<br>0.4655,<br>1.3436,<br>0.0952  | 0.974,<br>0.4762,<br>1.3067,<br>0.0649 | 0.985,<br>0.4427,<br>1.2900,<br>0.0777  | 1.000,<br>0.2559,<br>0.2574,<br>0.0147 |

Table S38: Main simulations: in each cell, from top to bottom are empirical type-I error/power, mean( $\hat{\theta}$ ), SD( $\hat{\theta}$ ), mean(SE( $\hat{\theta}$ )) when  $m = 10$ , the InSIDE violated,  $q = 0.2$ , and  $n = 50000$ .

| Methods \ $\theta$ | -0.1                                    | -0.05                                   | -0.03                                   | -0.01                                   | 0                                       | 0.01                                   | 0.03                                   | 0.05                                   | 0.1                                       |
|--------------------|-----------------------------------------|-----------------------------------------|-----------------------------------------|-----------------------------------------|-----------------------------------------|----------------------------------------|----------------------------------------|----------------------------------------|-------------------------------------------|
| cML-MA-AIC         | 0.712,<br>-0.0846,<br>0.0303,<br>0.0339 | 0.189,<br>-0.0379,<br>0.0273,<br>0.0334 | 0.055,<br>-0.0214,<br>0.0254,<br>0.0331 | 0.012,<br>-0.0065,<br>0.0238,<br>0.0331 | 0.009,<br>0.0005,<br>0.0236,<br>0.0332  | 0.018,<br>0.0076,<br>0.0240,<br>0.0334 | 0.058,<br>0.0220,<br>0.0256,<br>0.0342 | 0.150,<br>0.0380,<br>0.0281,<br>0.0352 | 0.644,<br>0.0839,<br>0.0325,<br>0.0374    |
| cML-MA-AIC-Profile | 0.711,<br>-0.0848,<br>0.0304,<br>0.0341 | 0.188,<br>-0.0380,<br>0.0274,<br>0.0336 | 0.053,<br>-0.0214,<br>0.0254,<br>0.0333 | 0.012,<br>-0.0065,<br>0.0238,<br>0.0333 | 0.009,<br>0.0005,<br>0.0236,<br>0.0334  | 0.018,<br>0.0076,<br>0.0240,<br>0.0336 | 0.057,<br>0.0220,<br>0.0256,<br>0.0344 | 0.149,<br>0.0380,<br>0.0281,<br>0.0354 | 0.640,<br>0.0840,<br>0.0326,<br>0.0376    |
| cML-AIC            | 0.873,<br>-0.0926,<br>0.0337,<br>0.0277 | 0.396,<br>-0.0440,<br>0.0319,<br>0.0282 | 0.191,<br>-0.0258,<br>0.0309,<br>0.0284 | 0.063,<br>-0.0079,<br>0.0303,<br>0.0287 | 0.059,<br>0.0004,<br>0.0301,<br>0.0289  | 0.066,<br>0.0090,<br>0.0306,<br>0.029  | 0.163,<br>0.0256,<br>0.0315,<br>0.0293 | 0.349,<br>0.0436,<br>0.0331,<br>0.0296 | 0.830,<br>0.0917,<br>0.0363,<br>0.0305    |
| cML-AIC-Profile    | 0.872,<br>-0.0928,<br>0.0338,<br>0.0278 | 0.393,<br>-0.0440,<br>0.0319,<br>0.0284 | 0.188,<br>-0.0258,<br>0.0309,<br>0.0286 | 0.063,<br>-0.0079,<br>0.0304,<br>0.0289 | 0.057,<br>0.0004,<br>0.0301,<br>0.0291  | 0.065,<br>0.0090,<br>0.0306,<br>0.0292 | 0.159,<br>0.0256,<br>0.0315,<br>0.0295 | 0.342,<br>0.0436,<br>0.0332,<br>0.0298 | 0.829,<br>0.0918,<br>0.0363,<br>0.0307    |
| cML-MA-BIC         | 0.974,<br>-0.0998,<br>0.0244,<br>0.026  | 0.499,<br>-0.0497,<br>0.0249,<br>0.0264 | 0.185,<br>-0.0297,<br>0.0250,<br>0.0267 | 0.046,<br>-0.0098,<br>0.0252,<br>0.0269 | 0.036,<br>0.0002,<br>0.0253,<br>0.027   | 0.052,<br>0.0101,<br>0.0255,<br>0.0272 | 0.176,<br>0.0301,<br>0.0258,<br>0.0275 | 0.439,<br>0.0501,<br>0.0261,<br>0.0278 | 0.957,<br>0.1002,<br>0.0271,<br>0.0286    |
| cML-MA-BIC-Profile | 0.974,<br>-0.0998,<br>0.0244,<br>0.0261 | 0.491,<br>-0.0497,<br>0.0249,<br>0.0265 | 0.182,<br>-0.0297,<br>0.0250,<br>0.0268 | 0.045,<br>-0.0098,<br>0.0253,<br>0.0271 | 0.034,<br>0.0002,<br>0.0253,<br>0.0271  | 0.050,<br>0.0101,<br>0.0255,<br>0.0273 | 0.175,<br>0.0301,<br>0.0258,<br>0.0276 | 0.432,<br>0.0501,<br>0.0261,<br>0.0279 | 0.956,<br>0.1002,<br>0.0271,<br>0.0287    |
| cML-BIC            | 0.974,<br>-1.001,<br>0.0246,<br>0.0256  | 0.504,<br>-0.0499,<br>0.0250,<br>0.0261 | 0.201,<br>-0.0299,<br>0.0253,<br>0.0263 | 0.051,<br>-0.0099,<br>0.0255,<br>0.0266 | 0.044,<br>0.0002,<br>0.0256,<br>0.0267  | 0.052,<br>0.0102,<br>0.0257,<br>0.0268 | 0.183,<br>0.0302,<br>0.0260,<br>0.0271 | 0.453,<br>0.0503,<br>0.0263,<br>0.0274 | 0.959,<br>0.1003,<br>0.0272,<br>0.0282    |
| cML-BIC-Profile    | 0.973,<br>-1.001,<br>0.0246,<br>0.0257  | 0.501,<br>-0.0499,<br>0.0250,<br>0.0262 | 0.195,<br>-0.0299,<br>0.0253,<br>0.0264 | 0.051,<br>-0.0099,<br>0.0255,<br>0.0267 | 0.043,<br>0.0002,<br>0.0256,<br>0.0268  | 0.052,<br>0.0102,<br>0.0257,<br>0.0269 | 0.179,<br>0.0302,<br>0.0260,<br>0.0272 | 0.447,<br>0.0503,<br>0.0263,<br>0.0275 | 0.958,<br>0.1003,<br>0.0272,<br>0.0283    |
| MR-Mix             | 0.877,<br>-0.1053,<br>0.0295,<br>0.0356 | 0.300,<br>-0.0516,<br>0.0294,<br>0.0353 | 0.101,<br>-0.0306,<br>0.0294,<br>0.0353 | 0.034,<br>-0.0102,<br>0.0294,<br>0.0353 | 0.024,<br>0.0000,<br>0.0294,<br>0.0353  | 0.032,<br>0.0100,<br>0.0294,<br>0.0354 | 0.093,<br>0.0298,<br>0.0293,<br>0.0354 | 0.270,<br>0.0491,<br>0.0293,<br>0.0354 | 0.818,<br>0.0958,<br>0.0295,<br>0.0358    |
| MR-ContMix         | 0.955,<br>-0.0993,<br>0.0258,<br>NA     | 0.485,<br>-0.0496,<br>0.0259,<br>NA     | 0.191,<br>-0.0298,<br>0.0261,<br>NA     | 0.051,<br>-0.0100,<br>0.0262,<br>NA     | 0.042,<br>-0.0001,<br>0.0263,<br>NA     | 0.061,<br>0.0099,<br>0.0265,<br>NA     | 0.188,<br>0.0298,<br>0.0269,<br>NA     | 0.436,<br>0.0497,<br>0.0272,<br>NA     | 0.941,<br>0.0995,<br>0.0280,<br>NA        |
| MR-Lasso           | 0.951,<br>-0.0994,<br>0.0251,<br>0.0274 | 0.447,<br>-0.0497,<br>0.0254,<br>0.028  | 0.169,<br>-0.0299,<br>0.0258,<br>0.0282 | 0.039,<br>-0.0098,<br>0.0260,<br>0.0285 | 0.035,<br>0.0002,<br>0.0260,<br>0.0286  | 0.048,<br>0.0102,<br>0.0260,<br>0.0287 | 0.154,<br>0.0302,<br>0.0264,<br>0.029  | 0.409,<br>0.0501,<br>0.0268,<br>0.0293 | 0.934,<br>0.0995,<br>0.0278,<br>0.0302    |
| MR-PRESSO          | 0.576,<br>-0.0696,<br>0.2056,<br>0.0827 | 0.293,<br>-0.0224,<br>0.2042,<br>0.0807 | 0.182,<br>-0.0037,<br>0.2038,<br>0.0803 | 0.132,<br>0.0139,<br>0.2030,<br>0.0791  | 0.126,<br>0.0239,<br>0.2029,<br>0.0791  | 0.126,<br>0.0338,<br>0.2029,<br>0.0792 | 0.202,<br>0.0529,<br>0.2010,<br>0.0775 | 0.311,<br>0.0725,<br>0.1993,<br>0.0764 | 0.592,<br>0.1192,<br>0.1960,<br>0.0744    |
| MR-IVW             | 0.098,<br>-0.0820,<br>0.2459,<br>0.2323 | 0.090,<br>-0.0320,<br>0.2459,<br>0.2323 | 0.083,<br>-0.0120,<br>0.2459,<br>0.2323 | 0.086,<br>0.0080,<br>0.2459,<br>0.2323  | 0.082,<br>0.0180,<br>0.2459,<br>0.2323  | 0.083,<br>0.0280,<br>0.2458,<br>0.2323 | 0.089,<br>0.0480,<br>0.2458,<br>0.2323 | 0.099,<br>0.0680,<br>0.2458,<br>0.2323 | 0.132,<br>0.1179,<br>0.2458,<br>0.2323    |
| MR-IVW-Oracle      | 0.954,<br>-0.0995,<br>0.0243,<br>0.0276 | 0.439,<br>-0.0497,<br>0.0247,<br>0.0282 | 0.165,<br>-0.0297,<br>0.0284,<br>0.0287 | 0.035,<br>-0.0098,<br>0.0287,<br>0.0288 | 0.032,<br>0.0002,<br>0.0253,<br>0.0288  | 0.042,<br>0.0101,<br>0.0255,<br>0.029  | 0.145,<br>0.0301,<br>0.0258,<br>0.0293 | 0.403,<br>0.0500,<br>0.0261,<br>0.0296 | 0.938,<br>0.0999,<br>0.0269,<br>0.0304    |
| MR-Egger           | 0.319,<br>0.2228,<br>1.4474,<br>0.941   | 0.314,<br>0.2689,<br>1.4474,<br>0.9411  | 0.310,<br>0.2873,<br>1.4474,<br>0.9412  | 0.302,<br>0.3057,<br>1.4474,<br>0.9413  | 0.303,<br>0.3149,<br>1.4474,<br>0.9413  | 0.304,<br>0.3241,<br>1.4474,<br>0.9413 | 0.302,<br>0.3425,<br>1.4474,<br>0.9414 | 0.308,<br>0.3609,<br>1.4475,<br>0.9415 | 0.314,<br>0.4068,<br>1.4476,<br>0.9418    |
| MR-Weighted-Median | 0.842,<br>-0.0991,<br>0.0304,<br>0.0336 | 0.304,<br>-0.0504,<br>0.0307,<br>0.0342 | 0.110,<br>-0.0309,<br>0.0309,<br>0.0345 | 0.039,<br>-0.0115,<br>0.0312,<br>0.0348 | 0.027,<br>-0.0019,<br>0.0314,<br>0.035  | 0.029,<br>0.0078,<br>0.0315,<br>0.0352 | 0.092,<br>0.0272,<br>0.0319,<br>0.0355 | 0.233,<br>0.0467,<br>0.0324,<br>0.036  | 0.754,<br>0.0952,<br>0.0336,<br>0.0371    |
| MR-Weighted-Mode   | 0.770,<br>-0.0976,<br>0.0317,<br>0.0377 | 0.223,<br>-0.0486,<br>0.0324,<br>0.0384 | 0.079,<br>-0.0290,<br>0.0327,<br>0.0388 | 0.023,<br>-0.0094,<br>0.0331,<br>0.0391 | 0.013,<br>0.0005,<br>0.0333,<br>0.0393  | 0.023,<br>0.0110,<br>0.0363,<br>0.0395 | 0.073,<br>0.0303,<br>0.0365,<br>0.04   | 0.196,<br>0.0500,<br>0.0367,<br>0.0404 | 0.700,<br>0.0989,<br>0.0377,<br>0.0416    |
| MR-RAPS1           | 0.122,<br>-0.0833,<br>0.2428,<br>0.2224 | 0.098,<br>-0.0332,<br>0.2428,<br>0.2225 | 0.095,<br>-0.0132,<br>0.2428,<br>0.2225 | 0.095,<br>0.0069,<br>0.2428,<br>0.2225  | 0.102,<br>0.0169,<br>0.2428,<br>0.2225  | 0.101,<br>0.0269,<br>0.2428,<br>0.2226 | 0.105,<br>0.0469,<br>0.2429,<br>0.2226 | 0.126,<br>0.0670,<br>0.2429,<br>0.2226 | 0.159,<br>0.1170,<br>0.2429,<br>0.2227    |
| MR-RAPS2           | 0.927,<br>-0.0474,<br>5.9000,<br>0.2051 | 0.769,<br>0.0560,<br>7.7647,<br>0.2415  | 0.661,<br>0.3383,<br>6.2639,<br>0.1445  | 0.618,<br>0.0578,<br>3.0608,<br>0.0725  | 0.612,<br>0.3082,<br>4.9676,<br>0.0968  | 0.613,<br>0.2456,<br>4.0430,<br>0.0937 | 0.676,<br>0.1217,<br>5.2827,<br>0.0964 | 0.776,<br>0.3031,<br>4.8627,<br>0.1029 | 0.915,<br>0.1242,<br>4.7136,<br>0.484     |
| MR-RAPS3           | 0.883,<br>-0.1674,<br>2.0258,<br>0.825  | 0.866,<br>-0.0560,<br>0.8177,<br>0.1021 | 0.865,<br>-0.0563,<br>1.2277,<br>0.174  | 0.856,<br>0.0360,<br>1.2228,<br>0.1773  | 0.852,<br>0.0318,<br>0.7947,<br>0.0931  | 0.853,<br>0.0392,<br>0.6982,<br>0.079  | 0.848,<br>0.0592,<br>0.6803,<br>0.0787 | 0.835,<br>0.0688,<br>0.9214,<br>0.1387 | 0.878,<br>1.2930,<br>32.7496,<br>391.6584 |
| MR-RAPS4           | 0.994,<br>-0.2322,<br>5.2930,<br>0.1929 | 0.903,<br>-0.0262,<br>5.7965,<br>0.224  | 0.827,<br>0.0720,<br>4.9655,<br>0.1233  | 0.795,<br>0.0055,<br>1.7865,<br>0.0654  | 0.773,<br>-0.0142,<br>2.3852,<br>0.0823 | 0.768,<br>0.0085,<br>2.1923,<br>0.0693 | 0.809,<br>0.0703,<br>2.1411,<br>0.0688 | 0.896,<br>0.1224,<br>2.0957,<br>0.07   | 0.988,<br>0.3060,<br>2.9404,<br>0.4607    |

Table S39: Main simulations: in each cell, from top to bottom are empirical type-I error/power, mean( $\hat{\theta}$ ), SD( $\hat{\theta}$ ), mean(SE( $\hat{\theta}$ )) when  $m = 10$ , the InSIDE violated,  $q = 0.2$ , and  $n = 100000$ .

| Methods \ $\theta$ | -0.1                                    | -0.05                                   | -0.03                                   | -0.01                                   | 0                                       | 0.01                                   | 0.03                                   | 0.05                                   | 0.1                                    |
|--------------------|-----------------------------------------|-----------------------------------------|-----------------------------------------|-----------------------------------------|-----------------------------------------|----------------------------------------|----------------------------------------|----------------------------------------|----------------------------------------|
| cML-MA-AIC         | 0.917,<br>-0.0878,<br>0.0229,<br>0.0245 | 0.379,<br>-0.0393,<br>0.0213,<br>0.0243 | 0.121,<br>-0.0217,<br>0.0193,<br>0.024  | 0.021,<br>-0.0065,<br>0.0177,<br>0.0237 | 0.017,<br>0.0006,<br>0.0176,<br>0.0237  | 0.032,<br>0.0076,<br>0.0178,<br>0.0239 | 0.121,<br>0.0223,<br>0.0202,<br>0.0247 | 0.351,<br>0.0395,<br>0.0228,<br>0.0255 | 0.877,<br>0.0872,<br>0.0253,<br>0.0269 |
| cML-MA-AIC-Profile | 0.917,<br>-0.0879,<br>0.0230,<br>0.0245 | 0.374,<br>-0.0393,<br>0.0213,<br>0.0244 | 0.120,<br>-0.0217,<br>0.0193,<br>0.0241 | 0.020,<br>-0.0065,<br>0.0177,<br>0.0238 | 0.017,<br>0.0006,<br>0.0176,<br>0.0238  | 0.032,<br>0.0076,<br>0.0178,<br>0.024  | 0.117,<br>0.0223,<br>0.0202,<br>0.0248 | 0.351,<br>0.0395,<br>0.0228,<br>0.0255 | 0.877,<br>0.0873,<br>0.0254,<br>0.027  |
| cML-AIC            | 0.965,<br>-0.0934,<br>0.0253,<br>0.0196 | 0.600,<br>-0.0441,<br>0.0246,<br>0.02   | 0.297,<br>-0.0252,<br>0.0202            | 0.087,<br>-0.0077,<br>0.0226,<br>0.0203 | 0.075,<br>0.0007,<br>0.0226,<br>0.0204  | 0.099,<br>0.0088,<br>0.0228,<br>0.0205 | 0.284,<br>0.0256,<br>0.0248,<br>0.0207 | 0.589,<br>0.0444,<br>0.0262,<br>0.021  | 0.947,<br>0.0935,<br>0.0279,<br>0.0216 |
| cML-AIC-Profile    | 0.964,<br>-0.0936,<br>0.0253,<br>0.0197 | 0.602,<br>-0.0442,<br>0.0247,<br>0.02   | 0.296,<br>-0.0252,<br>0.0237,<br>0.0202 | 0.086,<br>-0.0077,<br>0.0225,<br>0.0204 | 0.074,<br>0.0007,<br>0.0226,<br>0.0205  | 0.099,<br>0.0088,<br>0.0228,<br>0.0206 | 0.283,<br>0.0256,<br>0.0248,<br>0.0208 | 0.587,<br>0.0444,<br>0.0262,<br>0.021  | 0.947,<br>0.0935,<br>0.0279,<br>0.0217 |
| cML-MA-BIC         | 0.999,<br>-0.1000,<br>0.0181,<br>0.0182 | 0.776,<br>-0.0500,<br>0.0185,<br>0.0186 | 0.369,<br>-0.0301,<br>0.0186,<br>0.0187 | 0.085,<br>-0.0101,<br>0.0188,<br>0.0189 | 0.045,<br>-0.0002,<br>0.0189,<br>0.019  | 0.068,<br>0.0098,<br>0.0190,<br>0.0191 | 0.323,<br>0.0297,<br>0.0192,<br>0.0193 | 0.734,<br>0.0497,<br>0.0195,<br>0.0195 | 0.998,<br>0.0996,<br>0.0201,<br>0.0201 |
| cML-MA-BIC-Profile | 0.999,<br>-0.1000,<br>0.0181,<br>0.0183 | 0.776,<br>-0.0500,<br>0.0185,<br>0.0186 | 0.368,<br>-0.0301,<br>0.0186,<br>0.0188 | 0.085,<br>-0.0101,<br>0.0188,<br>0.019  | 0.045,<br>-0.0002,<br>0.0189,<br>0.019  | 0.068,<br>0.0098,<br>0.0190,<br>0.0191 | 0.323,<br>0.0297,<br>0.0192,<br>0.0193 | 0.734,<br>0.0497,<br>0.0195,<br>0.0195 | 0.998,<br>0.0996,<br>0.0201,<br>0.0201 |
| cML-BIC            | 0.999,<br>-0.1001,<br>0.0181,<br>0.018  | 0.783,<br>-0.0501,<br>0.0185,<br>0.0184 | 0.375,<br>-0.0302,<br>0.0186,<br>0.0185 | 0.090,<br>-0.0102,<br>0.0188,<br>0.0187 | 0.047,<br>-0.0002,<br>0.0189,<br>0.0188 | 0.072,<br>0.0098,<br>0.0190,<br>0.0189 | 0.329,<br>0.0298,<br>0.0192,<br>0.0191 | 0.736,<br>0.0498,<br>0.0194,<br>0.0193 | 0.998,<br>0.0998,<br>0.0201,<br>0.0199 |
| cML-BIC-Profile    | 0.999,<br>-0.1001,<br>0.0181,<br>0.0181 | 0.783,<br>-0.0501,<br>0.0185,<br>0.0184 | 0.375,<br>-0.0302,<br>0.0186,<br>0.0186 | 0.090,<br>-0.0102,<br>0.0188,<br>0.0187 | 0.047,<br>-0.0002,<br>0.0189,<br>0.0188 | 0.072,<br>0.0098,<br>0.0190,<br>0.0189 | 0.329,<br>0.0298,<br>0.0192,<br>0.0191 | 0.736,<br>0.0498,<br>0.0194,<br>0.0193 | 0.998,<br>0.0998,<br>0.0201,<br>0.0199 |
| MR-Mix             | 0.986,<br>-0.1057,<br>0.0212,<br>0.0254 | 0.577,<br>-0.0520,<br>0.0212,<br>0.0253 | 0.209,<br>-0.0312,<br>0.0211,<br>0.0253 | 0.042,<br>-0.0106,<br>0.0213,<br>0.0252 | 0.020,<br>-0.0006,<br>0.0213,<br>0.0252 | 0.031,<br>0.0095,<br>0.0213,<br>0.0252 | 0.182,<br>0.0291,<br>0.0212,<br>0.0253 | 0.492,<br>0.0483,<br>0.0212,<br>0.0253 | 0.960,<br>0.0948,<br>0.0214,<br>0.0254 |
| MR-ContMix         | 0.998,<br>-0.0998,<br>0.0193,<br>NA     | 0.781,<br>-0.0500,<br>0.0196,<br>NA     | 0.388,<br>-0.0300,<br>0.0197,<br>NA     | 0.100,<br>-0.0100,<br>0.0199,<br>NA     | 0.066,<br>-0.0001,<br>0.0200,<br>NA     | 0.090,<br>0.0099,<br>0.0201,<br>NA     | 0.356,<br>0.0298,<br>0.0204,<br>NA     | 0.729,<br>0.0497,<br>0.0206,<br>NA     | 0.993,<br>0.0996,<br>0.0212,<br>NA     |
| MR-Lasso           | 0.997,<br>-0.0999,<br>0.0186,<br>0.0194 | 0.727,<br>-0.0500,<br>0.0191,<br>0.0198 | 0.324,<br>-0.0302,<br>0.0191,<br>0.02   | 0.075,<br>-0.0102,<br>0.0193,<br>0.0202 | 0.047,<br>-0.0002,<br>0.0194,<br>0.0203 | 0.062,<br>0.0097,<br>0.0196,<br>0.0204 | 0.297,<br>0.0297,<br>0.0199,<br>0.0206 | 0.682,<br>0.0497,<br>0.0200,<br>0.0208 | 0.992,<br>0.0995,<br>0.0208,<br>0.0214 |
| MR-PRESSO          | 0.476,<br>-0.0771,<br>0.2305,<br>0.118  | 0.310,<br>-0.0285,<br>0.2295,<br>0.1157 | 0.193,<br>-0.0090,<br>0.2291,<br>0.1142 | 0.112,<br>0.0108,<br>0.2291,<br>0.1142  | 0.114,<br>0.0206,<br>0.2291,<br>0.1139  | 0.120,<br>0.0306,<br>0.2291,<br>0.1139 | 0.215,<br>0.0501,<br>0.2288,<br>0.1129 | 0.348,<br>0.0696,<br>0.2286,<br>0.1124 | 0.519,<br>0.1180,<br>0.2279,<br>0.1107 |
| MR-IVW             | 0.098,<br>-0.0766,<br>0.2444,<br>0.2346 | 0.074,<br>-0.0266,<br>0.2445,<br>0.2346 | 0.066,<br>-0.0066,<br>0.2445,<br>0.2346 | 0.066,<br>0.0134,<br>0.2445,<br>0.2346  | 0.061,<br>0.0234,<br>0.2445,<br>0.2346  | 0.060,<br>0.0334,<br>0.2445,<br>0.2346 | 0.066,<br>0.0534,<br>0.2445,<br>0.2346 | 0.085,<br>0.0734,<br>0.2445,<br>0.2346 | 0.123,<br>0.1233,<br>0.2446,<br>0.2346 |
| MR-IVW-Oracle      | 0.997,<br>-0.0999,<br>0.0179,<br>0.0196 | 0.728,<br>-0.0501,<br>0.0183,<br>0.02   | 0.315,<br>-0.0302,<br>0.0184,<br>0.0201 | 0.068,<br>-0.0102,<br>0.0186,<br>0.0203 | 0.038,<br>-0.0003,<br>0.0187,<br>0.0204 | 0.053,<br>0.0097,<br>0.0188,<br>0.0205 | 0.288,<br>0.0297,<br>0.0190,<br>0.0207 | 0.679,<br>0.0496,<br>0.0193,<br>0.0209 | 0.995,<br>0.0994,<br>0.0199,<br>0.0215 |
| MR-Egger           | 0.330,<br>0.3324,<br>1.4737,<br>0.9709  | 0.337,<br>0.3804,<br>1.4737,<br>0.971   | 0.336,<br>0.3995,<br>1.4736,<br>0.971   | 0.336,<br>0.4187,<br>1.4736,<br>0.9711  | 0.336,<br>0.4283,<br>1.4736,<br>0.9711  | 0.336,<br>0.4379,<br>1.4735,<br>0.9711 | 0.337,<br>0.4570,<br>1.4735,<br>0.9712 | 0.338,<br>0.4762,<br>1.4735,<br>0.9712 | 0.336,<br>0.5241,<br>1.4734,<br>0.9714 |
| MR-Weighted-Median | 0.985,<br>-0.0992,<br>0.0230,<br>0.0237 | 0.559,<br>-0.0501,<br>0.0235,<br>0.0241 | 0.241,<br>-0.0305,<br>0.0237,<br>0.0243 | 0.059,<br>-0.0109,<br>0.0239,<br>0.0245 | 0.043,<br>-0.0010,<br>0.0240,<br>0.0247 | 0.060,<br>0.0088,<br>0.0242,<br>0.0248 | 0.202,<br>0.0285,<br>0.0244,<br>0.025  | 0.496,<br>0.0481,<br>0.0247,<br>0.0253 | 0.960,<br>0.0971,<br>0.0257,<br>0.0261 |
| MR-Weighted-Mode   | 0.963,<br>-0.0991,<br>0.0247,<br>0.0272 | 0.459,<br>-0.0498,<br>0.0247,<br>0.0276 | 0.172,<br>-0.0301,<br>0.0249,<br>0.0278 | 0.033,<br>-0.0103,<br>0.0251,<br>0.0281 | 0.027,<br>-0.0004,<br>0.0253,<br>0.0282 | 0.037,<br>0.0096,<br>0.0253,<br>0.0283 | 0.155,<br>0.0296,<br>0.0257,<br>0.0286 | 0.418,<br>0.0493,<br>0.0260,<br>0.0289 | 0.920,<br>0.0986,<br>0.0270,<br>0.0298 |
| MR-RAPS1           | 0.111,<br>-0.0810,<br>0.2376,<br>0.2231 | 0.095,<br>-0.0311,<br>0.2377,<br>0.2231 | 0.088,<br>-0.0111,<br>0.2377,<br>0.2231 | 0.080,<br>0.0089,<br>0.2377,<br>0.2232  | 0.080,<br>0.0189,<br>0.2378,<br>0.2232  | 0.080,<br>0.0289,<br>0.2378,<br>0.2232 | 0.090,<br>0.0489,<br>0.2378,<br>0.2232 | 0.098,<br>0.0689,<br>0.2379,<br>0.2232 | 0.144,<br>0.1189,<br>0.2380,<br>0.2232 |
| MR-RAPS2           | 0.933,<br>0.0234,<br>5.5185,<br>0.0626  | 0.774,<br>0.1909,<br>2.7853,<br>0.0453  | 0.438,<br>0.2053,<br>2.5708,<br>0.0425  | 0.179,<br>0.3617,<br>3.6355,<br>0.0503  | 0.140,<br>0.3763,<br>8.3796,<br>0.0575  | 0.173,<br>0.6863,<br>3.6344,<br>0.0574 | 0.431,<br>0.4991,<br>3.2395,<br>0.0608 | 0.746,<br>0.5010,<br>3.6159,<br>0.0629 | 0.937,<br>0.4110,<br>3.9224,<br>0.08   |
| MR-RAPS3           | 0.900,<br>-0.1626,<br>1.3875,<br>0.2522 | 0.907,<br>0.0097,<br>1.1390,<br>0.1243  | 0.905,<br>0.0080,<br>1.7449,<br>0.0664  | 0.907,<br>0.0090,<br>1.0339,<br>0.1888  | 0.907,<br>0.0602,<br>0.7714,<br>0.1315  | 0.903,<br>0.0591,<br>0.7535,<br>0.0976 | 0.911,<br>0.1050,<br>0.5903,<br>0.0552 | 0.902,<br>0.1287,<br>0.5444,<br>0.046  | 0.911,<br>0.2049,<br>0.4986,<br>0.0421 |
| MR-RAPS4           | 0.999,<br>-0.1000,<br>0.0186,<br>0.0165 | 0.823,<br>-0.0501,<br>0.0189,<br>0.0168 | 0.449,<br>-0.0313,<br>0.0294,<br>0.0169 | 0.130,<br>-0.0141,<br>0.0484,<br>0.0171 | 0.084,<br>-0.0034,<br>0.0474,<br>0.0171 | 0.127,<br>0.0068,<br>0.0429,<br>0.0172 | 0.418,<br>0.0257,<br>0.0511,<br>0.0174 | 0.787,<br>0.0493,<br>0.0271,<br>0.0176 | 1.000,<br>0.1702,<br>1.5046,<br>0.0375 |

Table S40: Main simulations: in each cell, from top to bottom are empirical type-I error/power, mean( $\hat{\theta}$ ), SD( $\hat{\theta}$ ), mean(SE( $\hat{\theta}$ )) when  $m = 10$ , the InSIDE violated,  $q = 0.2$ , and  $n = 200000$ .

| Methods \ $\theta$ | -0.1                                      | -0.05                                    | -0.03                                   | -0.01                                    | 0                                       | 0.01                                   | 0.03                                   | 0.05                                   | 0.1                                    |
|--------------------|-------------------------------------------|------------------------------------------|-----------------------------------------|------------------------------------------|-----------------------------------------|----------------------------------------|----------------------------------------|----------------------------------------|----------------------------------------|
| cML-MA-AIC         | 0.999,<br>-0.0919,<br>0.0163,<br>0.0174   | 0.675,<br>-0.0421,<br>0.0163,<br>0.0176  | 0.282,<br>-0.0233,<br>0.0150,<br>0.0172 | 0.037,<br>-0.0073,<br>0.0129,<br>0.0168  | 0.013,<br>-0.0004,<br>0.0124,<br>0.0167 | 0.036,<br>0.0066,<br>0.0129,<br>0.017  | 0.244,<br>0.0226,<br>0.0154,<br>0.0177 | 0.618,<br>0.0411,<br>0.0171,<br>0.0184 | 0.981,<br>0.0902,<br>0.0184,<br>0.0192 |
| cML-MA-AIC-Profile | 0.999,<br>-0.0920,<br>0.0163,<br>0.0175   | 0.674,<br>-0.0421,<br>0.0163,<br>0.0176  | 0.282,<br>-0.0233,<br>0.0150,<br>0.0173 | 0.037,<br>-0.0073,<br>0.0129,<br>0.0168  | 0.013,<br>-0.0004,<br>0.0124,<br>0.0168 | 0.037,<br>0.0066,<br>0.0130,<br>0.017  | 0.242,<br>0.0226,<br>0.0154,<br>0.0177 | 0.617,<br>0.0411,<br>0.0171,<br>0.0184 | 0.981,<br>0.0903,<br>0.0184,<br>0.0192 |
| cML-AIC            | 0.999,<br>-0.0964,<br>0.0179,<br>0.0139   | 0.848,<br>-0.0463,<br>0.0181,<br>0.0142  | 0.503,<br>-0.0267,<br>0.0175,<br>0.0143 | 0.128,<br>-0.0086,<br>0.0164,<br>0.0144  | 0.073,<br>-0.0005,<br>0.0159,<br>0.0145 | 0.124,<br>0.0076,<br>0.0165,<br>0.0145 | 0.453,<br>0.0255,<br>0.0179,<br>0.0147 | 0.810,<br>0.0451,<br>0.0193,<br>0.0149 | 0.989,<br>0.0948,<br>0.0202,<br>0.0153 |
| cML-AIC-Profile    | 0.999,<br>-0.0965,<br>0.0180,<br>0.0139   | 0.847,<br>-0.0464,<br>0.0181,<br>0.0142  | 0.503,<br>-0.0267,<br>0.0175,<br>0.0143 | 0.127,<br>-0.0086,<br>0.0164,<br>0.0144  | 0.073,<br>-0.0005,<br>0.0159,<br>0.0145 | 0.124,<br>0.0076,<br>0.0165,<br>0.0146 | 0.453,<br>0.0255,<br>0.0179,<br>0.0147 | 0.806,<br>0.0451,<br>0.0193,<br>0.0149 | 0.989,<br>0.0949,<br>0.0202,<br>0.0154 |
| cML-MA-BIC         | 1.000,<br>-1.002,<br>0.0130,<br>0.0129    | 0.956,<br>-0.0502,<br>0.0132,<br>0.0131  | 0.637,<br>-0.0302,<br>0.0133,<br>0.0132 | 0.122,<br>-0.0102,<br>0.0134,<br>0.0134  | 0.053,<br>-0.0002,<br>0.0135,<br>0.0134 | 0.119,<br>0.0097,<br>0.0136,<br>0.0135 | 0.593,<br>0.0297,<br>0.0138,<br>0.0136 | 0.945,<br>0.0497,<br>0.0139,<br>0.0138 | 1.000,<br>0.0997,<br>0.0144,<br>0.0142 |
| cML-MA-BIC-Profile | 1.000,<br>-1.002,<br>0.0130,<br>0.0129    | 0.956,<br>-0.0502,<br>0.0132,<br>0.0131  | 0.638,<br>-0.0302,<br>0.0133,<br>0.0133 | 0.121,<br>-0.0102,<br>0.0134,<br>0.0134  | 0.053,<br>-0.0002,<br>0.0135,<br>0.0135 | 0.119,<br>0.0097,<br>0.0136,<br>0.0135 | 0.590,<br>0.0297,<br>0.0138,<br>0.0137 | 0.944,<br>0.0497,<br>0.0139,<br>0.0138 | 1.000,<br>0.0997,<br>0.0144,<br>0.0142 |
| cML-BIC            | 1.000,<br>-1.002,<br>0.0130,<br>0.0128    | 0.960,<br>-0.0502,<br>0.0132,<br>0.013   | 0.644,<br>-0.0302,<br>0.0133,<br>0.0132 | 0.123,<br>-0.0102,<br>0.0135,<br>0.0133  | 0.057,<br>-0.0002,<br>0.0135,<br>0.0133 | 0.122,<br>0.0098,<br>0.0136,<br>0.0134 | 0.600,<br>0.0298,<br>0.0138,<br>0.0135 | 0.946,<br>0.0498,<br>0.0139,<br>0.0137 | 1.000,<br>0.0998,<br>0.0144,<br>0.0141 |
| cML-BIC-Profile    | 1.000,<br>-1.002,<br>0.0130,<br>0.0128    | 0.960,<br>-0.0502,<br>0.0132,<br>0.0131  | 0.644,<br>-0.0302,<br>0.0133,<br>0.0132 | 0.122,<br>-0.0102,<br>0.0135,<br>0.0133  | 0.057,<br>-0.0002,<br>0.0135,<br>0.0133 | 0.122,<br>0.0098,<br>0.0136,<br>0.0134 | 0.600,<br>0.0298,<br>0.0138,<br>0.0136 | 0.945,<br>0.0498,<br>0.0139,<br>0.0137 | 1.000,<br>0.0998,<br>0.0144,<br>0.0141 |
| MR-Mix             | 0.997,<br>-1.052,<br>0.0152,<br>0.0183    | 0.848,<br>-0.0516,<br>0.0151,<br>0.0183  | 0.389,<br>-0.0307,<br>0.0151,<br>0.0183 | 0.060,<br>-0.0102,<br>0.0151,<br>0.0182  | 0.025,<br>-0.0001,<br>0.0151,<br>0.0182 | 0.071,<br>0.0099,<br>0.0151,<br>0.0183 | 0.379,<br>0.0297,<br>0.0152,<br>0.0183 | 0.791,<br>0.0490,<br>0.0152,<br>0.0183 | 0.998,<br>0.0955,<br>0.0154,<br>0.0183 |
| MR-ContMix         | 1.000,<br>-1.001,<br>0.0133,<br>NA        | 0.957,<br>-0.0501,<br>0.0135,<br>NA      | 0.665,<br>-0.0302,<br>0.0136,<br>NA     | 0.153,<br>-0.0102,<br>0.0137,<br>NA      | 0.071,<br>-0.0002,<br>0.0138,<br>NA     | 0.144,<br>0.0097,<br>0.0139,<br>NA     | 0.615,<br>0.0297,<br>0.0140,<br>NA     | 0.944,<br>0.0497,<br>0.0142,<br>NA     | 1.000,<br>0.0996,<br>0.0147,<br>NA     |
| MR-Lasso           | 1.000,<br>-1.001,<br>0.0132,<br>0.0138    | 0.935,<br>-0.0501,<br>0.0134,<br>0.0141  | 0.580,<br>-0.0301,<br>0.0135,<br>0.0142 | 0.109,<br>-0.0102,<br>0.0136,<br>0.0143  | 0.056,<br>-0.0002,<br>0.0138,<br>0.0144 | 0.102,<br>0.0098,<br>0.0138,<br>0.0145 | 0.539,<br>0.0297,<br>0.0140,<br>0.0146 | 0.919,<br>0.0497,<br>0.0141,<br>0.0148 | 1.000,<br>0.0997,<br>0.0146,<br>0.0152 |
| MR-PRESSO          | 0.402,<br>-0.0816,<br>0.2386,<br>0.1461   | 0.309,<br>-0.0320,<br>0.2384,<br>0.1447  | 0.209,<br>-0.0122,<br>0.2384,<br>0.1448 | 0.100,<br>0.0078,<br>0.2383,<br>0.1448   | 0.089,<br>0.0178,<br>0.2382,<br>0.1442  | 0.097,<br>0.0278,<br>0.2382,<br>0.1442 | 0.207,<br>0.0478,<br>0.2382,<br>0.1439 | 0.328,<br>0.0679,<br>0.2376,<br>0.1416 | 0.436,<br>0.1175,<br>0.2371,<br>0.1396 |
| MR-IVW             | 0.099,<br>-0.0822,<br>0.2431,<br>0.2356   | 0.084,<br>-0.0321,<br>0.2431,<br>0.2356  | 0.074,<br>-0.0120,<br>0.2431,<br>0.2356 | 0.071,<br>0.0080,<br>0.2431,<br>0.2356   | 0.071,<br>0.0181,<br>0.2431,<br>0.2356  | 0.075,<br>0.0281,<br>0.2431,<br>0.2356 | 0.083,<br>0.0481,<br>0.2431,<br>0.2355 | 0.087,<br>0.0682,<br>0.2430,<br>0.2355 | 0.125,<br>0.1183,<br>0.2430,<br>0.2355 |
| MR-IVW-Oracle      | 1.000,<br>-1.001,<br>0.0129,<br>0.0139    | 0.936,<br>-0.0501,<br>0.0131,<br>0.0141  | 0.579,<br>-0.0301,<br>0.0133,<br>0.0143 | 0.105,<br>-0.0102,<br>0.0134,<br>0.0144  | 0.049,<br>-0.0002,<br>0.0135,<br>0.0145 | 0.097,<br>0.0098,<br>0.0135,<br>0.0145 | 0.537,<br>0.0298,<br>0.0137,<br>0.0147 | 0.921,<br>0.0498,<br>0.0138,<br>0.0148 | 1.000,<br>0.0997,<br>0.0143,<br>0.0152 |
| MR-Egger           | 0.341,<br>0.3442,<br>1.5425,<br>0.9761    | 0.347,<br>0.3933,<br>1.5424,<br>0.9761   | 0.347,<br>0.4129,<br>1.5424,<br>0.9761  | 0.345,<br>0.4326,<br>1.5423,<br>0.9761   | 0.345,<br>0.4424,<br>1.5423,<br>0.9761  | 0.347,<br>0.4522,<br>1.5423,<br>0.9761 | 0.348,<br>0.4718,<br>1.5423,<br>0.9761 | 0.348,<br>0.4914,<br>1.5422,<br>0.9761 | 0.353,<br>0.5405,<br>1.5422,<br>0.9762 |
| MR-Weighted-Median | 1.000,<br>-1.003,<br>0.0161,<br>0.0168    | 0.848,<br>-0.0506,<br>0.0165,<br>0.0171  | 0.440,<br>-0.0308,<br>0.0167,<br>0.0173 | 0.081,<br>-0.0110,<br>0.0169,<br>0.0174  | 0.041,<br>-0.0011,<br>0.0169,<br>0.0175 | 0.075,<br>0.0088,<br>0.0170,<br>0.0176 | 0.376,<br>0.0285,<br>0.0173,<br>0.0178 | 0.768,<br>0.0483,<br>0.0175,<br>0.018  | 1.000,<br>0.0977,<br>0.0180,<br>0.0185 |
| MR-Weighted-Mode   | 0.997,<br>-1.003,<br>0.0194,<br>0.0194    | 0.747,<br>-0.0503,<br>0.0197,<br>0.0198  | 0.341,<br>-0.0302,<br>0.0200,<br>0.0199 | 0.049,<br>-0.0103,<br>0.0201,<br>0.0201  | 0.026,<br>-0.0004,<br>0.0203,<br>0.0202 | 0.052,<br>0.0096,<br>0.0205,<br>0.0203 | 0.312,<br>0.0295,<br>0.0207,<br>0.0205 | 0.687,<br>0.0498,<br>0.0191,<br>0.0207 | 0.995,<br>0.0988,<br>0.0300,<br>0.0213 |
| MR-RAPS1           | 0.109,<br>-0.0823,<br>0.2365,<br>0.2234   | 0.098,<br>-0.0323,<br>0.2365,<br>0.2235  | 0.101,<br>-0.0123,<br>0.2365,<br>0.2235 | 0.097,<br>0.0078,<br>0.2365,<br>0.2235   | 0.093,<br>0.0178,<br>0.2365,<br>0.2235  | 0.090,<br>0.0278,<br>0.2365,<br>0.2235 | 0.099,<br>0.0478,<br>0.2366,<br>0.2235 | 0.106,<br>0.0678,<br>0.2366,<br>0.2235 | 0.133,<br>0.1178,<br>0.2366,<br>0.2235 |
| MR-RAPS2           | 0.945,<br>0.3227,<br>4.0103,<br>0.0599    | 0.906,<br>-0.1949,<br>11.4382,<br>0.0628 | 0.691,<br>0.4203,<br>4.6843,<br>0.052   | 0.311,<br>-0.1507,<br>15.9910,<br>0.0627 | 0.229,<br>0.4714,<br>4.1526,<br>0.0643  | 0.262,<br>0.2704,<br>3.1951,<br>0.0513 | 0.661,<br>0.0532,<br>4.0533,<br>0.0578 | 0.882,<br>0.2976,<br>3.0651,<br>0.0495 | 0.942,<br>0.5987,<br>5.4713,<br>0.0614 |
| MR-RAPS3           | 0.936,<br>-22.1268,<br>693.8632,<br>20170 | 0.945,<br>-0.0436,<br>1.4025,<br>0.0965  | 0.932,<br>-0.0903,<br>1.6370,<br>0.2188 | 0.917,<br>0.1199,<br>3.1922,<br>1.347    | 0.914,<br>0.0685,<br>0.8184,<br>0.0696  | 0.913,<br>0.0690,<br>0.7006,<br>0.0502 | 0.916,<br>0.0437,<br>1.8048,<br>0.4863 | 0.923,<br>0.1284,<br>0.5885,<br>0.0368 | 0.943,<br>0.1937,<br>0.5532,<br>0.0333 |
| MR-RAPS4           | 1.000,<br>-1.009,<br>0.0183,<br>0.0117    | 0.970,<br>-0.0514,<br>0.0699,<br>0.0119  | 0.708,<br>-0.0292,<br>0.0875,<br>0.012  | 0.203,<br>-0.0037,<br>0.1305,<br>0.0122  | 0.114,<br>0.0035,<br>0.1153,<br>0.0122  | 0.182,<br>0.0154,<br>0.1007,<br>0.0122 | 0.680,<br>0.0294,<br>0.0746,<br>0.0123 | 0.958,<br>0.0488,<br>0.0429,<br>0.0124 | 1.000,<br>0.1002,<br>0.0207,<br>0.0128 |

Table S41: Main simulations: in each cell, from top to bottom are empirical type-I error/power, mean( $\hat{\theta}$ ), SD( $\hat{\theta}$ ), mean(SE( $\hat{\theta}$ )) when  $m = 10$ , the InSIDE violated,  $q = 0.4$ , and  $n = 50000$ .

| Methods \ $\theta$ | -0.1                                    | -0.05                                   | -0.03                                   | -0.01                                    | 0                                       | 0.01                                    | 0.03                                    | 0.05                                    | 0.1                                    |
|--------------------|-----------------------------------------|-----------------------------------------|-----------------------------------------|------------------------------------------|-----------------------------------------|-----------------------------------------|-----------------------------------------|-----------------------------------------|----------------------------------------|
| cML-MA-AIC         | 0.561,<br>-0.0808,<br>0.0344,<br>0.0398 | 0.126,<br>-0.0353,<br>0.0312,<br>0.0392 | 0.042,<br>-0.0198,<br>0.0292,<br>0.0391 | 0.015,<br>-0.0055,<br>0.0286,<br>0.039   | 0.016,<br>0.0015,<br>0.0282,<br>0.0393  | 0.013,<br>0.0080,<br>0.0285,<br>0.0395  | 0.050,<br>0.0218,<br>0.0306,<br>0.0402  | 0.116,<br>0.0375,<br>0.0330,<br>0.0412  | 0.491,<br>0.0817,<br>0.0385,<br>0.0436 |
| cML-MA-AIC-Profile | 0.557,<br>-0.0808,<br>0.0345,<br>0.04   | 0.123,<br>-0.0353,<br>0.0313,<br>0.0395 | 0.040,<br>-0.0198,<br>0.0292,<br>0.0393 | 0.015,<br>-0.0055,<br>0.0286,<br>0.0393  | 0.016,<br>0.0015,<br>0.0282,<br>0.0395  | 0.013,<br>0.0080,<br>0.0285,<br>0.0398  | 0.050,<br>0.0218,<br>0.0306,<br>0.0405  | 0.114,<br>0.0375,<br>0.0330,<br>0.0414  | 0.489,<br>0.0818,<br>0.0386,<br>0.0438 |
| cML-AIC            | 0.755,<br>-0.0882,<br>0.0387,<br>0.0324 | 0.283,<br>-0.0402,<br>0.0376,<br>0.033  | 0.136,<br>-0.0227,<br>0.0365,<br>0.0333 | 0.066,<br>-0.0060,<br>0.0362,<br>0.0337  | 0.057,<br>0.0022,<br>0.0362,<br>0.0339  | 0.077,<br>0.0101,<br>0.0365,<br>0.034   | 0.146,<br>0.0261,<br>0.0377,<br>0.0344  | 0.302,<br>0.0436,<br>0.0398,<br>0.0348  | 0.708,<br>0.0908,<br>0.0438,<br>0.0357 |
| cML-AIC-Profile    | 0.751,<br>-0.0883,<br>0.0389,<br>0.0327 | 0.281,<br>-0.0403,<br>0.0376,<br>0.0333 | 0.135,<br>-0.0227,<br>0.0365,<br>0.0336 | 0.063,<br>-0.0060,<br>0.0362,<br>0.0339  | 0.056,<br>0.0022,<br>0.0362,<br>0.0341  | 0.072,<br>0.0101,<br>0.0365,<br>0.0343  | 0.144,<br>0.0261,<br>0.0377,<br>0.0346  | 0.298,<br>0.0436,<br>0.0398,<br>0.035   | 0.706,<br>0.0908,<br>0.0438,<br>0.0359 |
| cML-MA-BIC         | 0.898,<br>-0.0990,<br>0.0299,<br>0.0304 | 0.363,<br>-0.0490,<br>0.0304,<br>0.031  | 0.149,<br>-0.0291,<br>0.0305,<br>0.0313 | 0.056,<br>-0.0092,<br>0.0308,<br>0.0315  | 0.036,<br>0.0007,<br>0.0309,<br>0.0317  | 0.054,<br>0.0107,<br>0.0311,<br>0.0318  | 0.156,<br>0.0305,<br>0.0314,<br>0.0322  | 0.351,<br>0.0505,<br>0.0318,<br>0.0325  | 0.864,<br>1.1005,<br>0.0328,<br>0.0334 |
| cML-MA-BIC-Profile | 0.897,<br>-0.0990,<br>0.0299,<br>0.0306 | 0.361,<br>-0.0490,<br>0.0304,<br>0.0311 | 0.148,<br>-0.0291,<br>0.0305,<br>0.0314 | 0.055,<br>-0.0092,<br>0.0308,<br>0.0317  | 0.036,<br>0.0007,<br>0.0309,<br>0.0318  | 0.052,<br>0.0107,<br>0.0311,<br>0.032   | 0.152,<br>0.0305,<br>0.0314,<br>0.0323  | 0.347,<br>0.0505,<br>0.0318,<br>0.0326  | 0.862,<br>1.1005,<br>0.0328,<br>0.0336 |
| cML-BIC            | 0.907,<br>-0.0994,<br>0.0299,<br>0.03   | 0.375,<br>-0.0493,<br>0.0305,<br>0.0306 | 0.157,<br>-0.0293,<br>0.0307,<br>0.0308 | 0.060,<br>-0.0093,<br>0.0309,<br>0.0311  | 0.042,<br>0.0008,<br>0.0312,<br>0.0313  | 0.062,<br>0.0108,<br>0.0314,<br>0.0314  | 0.162,<br>0.0308,<br>0.0317,<br>0.0317  | 0.361,<br>0.0508,<br>0.0321,<br>0.0321  | 0.874,<br>1.1007,<br>0.0329,<br>0.033  |
| cML-BIC-Profile    | 0.906,<br>-0.0994,<br>0.0299,<br>0.0302 | 0.372,<br>-0.0493,<br>0.0305,<br>0.0307 | 0.156,<br>-0.0293,<br>0.0307,<br>0.031  | 0.059,<br>-0.0093,<br>0.0309,<br>0.0312  | 0.042,<br>0.0008,<br>0.0312,<br>0.0314  | 0.058,<br>0.0108,<br>0.0314,<br>0.0316  | 0.159,<br>0.0308,<br>0.0317,<br>0.0319  | 0.355,<br>0.0508,<br>0.0321,<br>0.0322  | 0.871,<br>1.1007,<br>0.0329,<br>0.0332 |
| MR-Mix             | 0.814,<br>-0.1038,<br>0.0327,<br>0.0377 | 0.268,<br>-0.0505,<br>0.0325,<br>0.0388 | 0.097,<br>-0.0301,<br>0.0325,<br>0.0375 | 0.037,<br>-0.0097,<br>0.0326,<br>0.0374  | 0.030,<br>0.0004,<br>0.0325,<br>0.0373  | 0.036,<br>0.0103,<br>0.0326,<br>0.0372  | 0.099,<br>0.0297,<br>0.0325,<br>0.0372  | 0.257,<br>0.0488,<br>0.0327,<br>0.0373  | 0.759,<br>0.0949,<br>0.0325,<br>0.0374 |
| MR-ContMix         | 0.903,<br>-0.0988,<br>0.0313,<br>NA     | 0.393,<br>-0.0488,<br>0.0321,<br>NA     | 0.179,<br>-0.0289,<br>0.0323,<br>NA     | 0.073,<br>-0.0090,<br>0.0326,<br>NA      | 0.056,<br>0.0009,<br>0.0328,<br>NA      | 0.071,<br>0.0108,<br>0.0331,<br>NA      | 0.179,<br>0.0306,<br>0.0335,<br>NA      | 0.381,<br>0.0505,<br>0.0338,<br>NA      | 0.862,<br>1.1007,<br>0.0351,<br>NA     |
| MR-Lasso           | 0.868,<br>-0.0971,<br>0.0538,<br>0.033  | 0.327,<br>-0.0471,<br>0.0540,<br>0.0337 | 0.139,<br>-0.0270,<br>0.0542,<br>0.034  | 0.053,<br>-0.0071,<br>0.0543,<br>0.0343  | 0.037,<br>0.0029,<br>0.0544,<br>0.0344  | 0.056,<br>0.0129,<br>0.0545,<br>0.0346  | 0.142,<br>0.0327,<br>0.0535,<br>0.0349  | 0.328,<br>0.0527,<br>0.0538,<br>0.0352  | 0.818,<br>1.1026,<br>0.0543,<br>0.0362 |
| MR-PRESSO          | 0.366,<br>-0.0568,<br>0.3305,<br>0.1626 | 0.200,<br>-0.0085,<br>0.3300,<br>0.162  | 0.154,<br>0.0111,<br>0.3298,<br>0.1613  | 0.130,<br>0.0306,<br>0.3296,<br>0.1605   | 0.121,<br>0.0401,<br>0.3295,<br>0.1599  | 0.131,<br>0.0498,<br>0.3294,<br>0.1598  | 0.164,<br>0.0683,<br>0.3284,<br>0.1578  | 0.240,<br>0.0882,<br>0.3275,<br>0.1556  | 0.416,<br>1.1365,<br>0.3253,<br>0.1499 |
| MR-IVW             | 0.119,<br>-0.0575,<br>0.3493,<br>0.325  | 0.109,<br>-0.0073,<br>0.3493,<br>0.325  | 0.111,<br>0.0127,<br>0.3493,<br>0.325   | 0.105,<br>0.0328,<br>0.3493,<br>0.325    | 0.106,<br>0.0428,<br>0.3493,<br>0.325   | 0.106,<br>0.0528,<br>0.3493,<br>0.325   | 0.106,<br>0.0729,<br>0.3493,<br>0.325   | 0.104,<br>0.0929,<br>0.3493,<br>0.325   | 0.108,<br>1.1430,<br>0.3493,<br>0.3251 |
| MR-IVW-Oracle      | 0.875,<br>-0.0991,<br>0.0295,<br>0.0327 | 0.320,<br>-0.0493,<br>0.0300,<br>0.0333 | 0.132,<br>-0.0293,<br>0.0303,<br>0.0336 | 0.043,<br>-0.0094,<br>0.0305,<br>0.0339  | 0.027,<br>0.0005,<br>0.0307,<br>0.034   | 0.046,<br>0.0105,<br>0.0308,<br>0.0342  | 0.131,<br>0.0304,<br>0.0311,<br>0.0345  | 0.312,<br>0.0503,<br>0.0315,<br>0.0349  | 0.817,<br>1.1001,<br>0.0324,<br>0.0358 |
| MR-Egger           | 0.198,<br>0.3768,<br>1.5720,<br>1.169   | 0.205,<br>0.4239,<br>1.5718,<br>1.17    | 0.208,<br>0.4428,<br>1.5717,<br>1.17    | 0.208,<br>0.4616,<br>1.5717,<br>1.17     | 0.209,<br>0.4710,<br>1.5717,<br>1.17    | 0.210,<br>0.4804,<br>1.5716,<br>1.17    | 0.211,<br>0.4992,<br>1.5716,<br>1.17    | 0.211,<br>0.5180,<br>1.5715,<br>1.17    | 0.216,<br>0.5649,<br>1.5714,<br>1.171  |
| MR-Weighted-Median | 0.743,<br>-0.1006,<br>0.0437,<br>0.0391 | 0.287,<br>-0.0532,<br>0.0457,<br>0.0399 | 0.138,<br>-0.0343,<br>0.0466,<br>0.0402 | 0.069,<br>-0.0153,<br>0.0476,<br>0.0406  | 0.058,<br>-0.0058,<br>0.0482,<br>0.0408 | 0.060,<br>0.0037,<br>0.0489,<br>0.041   | 0.106,<br>0.0227,<br>0.0503,<br>0.0415  | 0.205,<br>0.0415,<br>0.0521,<br>0.042   | 0.591,<br>0.0884,<br>0.0569,<br>0.0433 |
| MR-Weighted-Mode   | 0.831,<br>-0.0975,<br>0.0649,<br>0.0382 | 0.281,<br>-0.0489,<br>0.0679,<br>0.0389 | 0.113,<br>-0.0291,<br>0.0684,<br>0.0394 | 0.043,<br>-0.0102,<br>0.0731,<br>0.0397  | 0.039,<br>-0.0004,<br>0.0732,<br>0.0398 | 0.048,<br>0.0093,<br>0.0733,<br>0.04    | 0.115,<br>0.0284,<br>0.0745,<br>0.0406  | 0.273,<br>0.0483,<br>0.0750,<br>0.0414  | 0.761,<br>0.0939,<br>0.0913,<br>0.043  |
| MR-RAPS1           | 0.131,<br>-0.0553,<br>0.3416,<br>0.3099 | 0.125,<br>-0.0052,<br>0.3417,<br>0.31   | 0.122,<br>0.0148,<br>0.3417,<br>0.31    | 0.116,<br>0.0348,<br>0.3417,<br>0.31     | 0.116,<br>0.0449,<br>0.3417,<br>0.3101  | 0.114,<br>0.0549,<br>0.3417,<br>0.3101  | 0.111,<br>0.0749,<br>0.3418,<br>0.3101  | 0.115,<br>0.0950,<br>0.3418,<br>0.3101  | 0.110,<br>1.1450,<br>0.3419,<br>0.3102 |
| MR-RAPS2           | 0.115,<br>-0.0818,<br>0.5677,<br>0.3129 | 0.089,<br>-0.0160,<br>0.3351,<br>0.3139 | 0.088,<br>0.0027,<br>0.3285,<br>0.3138  | 0.080,<br>0.0335,<br>0.4325,<br>0.3138   | 0.078,<br>0.0346,<br>0.3329,<br>0.3134  | 0.083,<br>0.0448,<br>0.3348,<br>0.3136  | 0.087,<br>0.0459,<br>0.8315,<br>0.316   | 0.086,<br>0.0865,<br>0.3255,<br>0.3141  | 0.093,<br>1.1109,<br>0.8306,<br>0.3169 |
| MR-RAPS3           | 0.885,<br>1.3579,<br>44.4267,<br>165.6  | 0.884,<br>0.5522,<br>13.3942,<br>13.21  | 0.897,<br>-0.0384,<br>16.5791,<br>17.56 | 0.905,<br>35.0963,<br>819.6598,<br>49490 | 0.909,<br>0.3326,<br>7.6864,<br>3.564   | 0.914,<br>0.4553,<br>18.7536,<br>38.44  | 0.916,<br>0.8766,<br>9.9464,<br>13.95   | 0.916,<br>-0.5582,<br>21.6160,<br>51.22 | 0.914,<br>0.5238,<br>5.7278,<br>2.47   |
| MR-RAPS4           | 0.983,<br>-0.1091,<br>3.6669,<br>0.5702 | 0.953,<br>-0.2614,<br>11.5315,<br>1.389 | 0.935,<br>0.0849,<br>3.9536,<br>0.8077  | 0.925,<br>-0.0260,<br>7.6959,<br>1.438   | 0.919,<br>-0.2501,<br>8.8183,<br>0.4624 | 0.911,<br>-0.2434,<br>7.5444,<br>0.4677 | 0.924,<br>-0.1388,<br>8.6924,<br>0.7604 | 0.944,<br>-0.1657,<br>7.6694,<br>0.5314 | 0.980,<br>0.0310,<br>7.2304,<br>0.4874 |

Table S42: Main simulations: in each cell, from top to bottom are empirical type-I error/power, mean( $\hat{\theta}$ ), SD( $\hat{\theta}$ ), mean(SE( $\hat{\theta}$ )) when  $m = 10$ , the InSIDE violated,  $q = 0.4$ , and  $n = 100000$ .

| Methods \ $\theta$ | -0.1                                    | -0.05                                   | -0.03                                   | -0.01                                   | 0                                        | 0.01                                   | 0.03                                    | 0.05                                   | 0.1                                     |
|--------------------|-----------------------------------------|-----------------------------------------|-----------------------------------------|-----------------------------------------|------------------------------------------|----------------------------------------|-----------------------------------------|----------------------------------------|-----------------------------------------|
| cML-MA-AIC         | 0.851,<br>-0.0861,<br>0.0267,<br>0.0284 | 0.258,<br>-0.0379,<br>0.0247,<br>0.0283 | 0.092,<br>-0.0215,<br>0.0221,<br>0.0279 | 0.015,<br>-0.0063,<br>0.0205,<br>0.0277 | 0.013,<br>0.0002,<br>0.0200,<br>0.0278   | 0.019,<br>0.0070,<br>0.0205,<br>0.028  | 0.081,<br>0.0215,<br>0.0226,<br>0.0287  | 0.238,<br>0.0379,<br>0.0253,<br>0.0297 | 0.769,<br>0.0850,<br>0.0288,<br>0.0314  |
| cML-MA-AIC-Profile | 0.851,<br>-0.0862,<br>0.0269,<br>0.0284 | 0.258,<br>-0.0379,<br>0.0247,<br>0.0284 | 0.092,<br>-0.0215,<br>0.0221,<br>0.0278 | 0.015,<br>-0.0063,<br>0.0205,<br>0.0278 | 0.012,<br>0.0002,<br>0.0200,<br>0.0279   | 0.018,<br>0.0070,<br>0.0205,<br>0.0281 | 0.080,<br>0.0215,<br>0.0226,<br>0.0288  | 0.236,<br>0.0380,<br>0.0253,<br>0.0298 | 0.766,<br>0.0851,<br>0.0288,<br>0.0315  |
| cML-AIC            | 0.921,<br>-0.0918,<br>0.0302,<br>0.0231 | 0.477,<br>-0.0428,<br>0.0290,<br>0.0235 | 0.240,<br>-0.0248,<br>0.0273,<br>0.0236 | 0.089,<br>-0.0073,<br>0.0264,<br>0.0238 | 0.077,<br>0.0004,<br>0.0262,<br>0.0239   | 0.078,<br>0.0083,<br>0.0266,<br>0.0241 | 0.231,<br>0.0248,<br>0.0280,<br>0.0242  | 0.480,<br>0.0427,<br>0.0301,<br>0.0246 | 0.883,<br>0.0916,<br>0.0321,<br>0.0252  |
| cML-AIC-Profile    | 0.921,<br>-0.0920,<br>0.0304,<br>0.0231 | 0.476,<br>-0.0428,<br>0.0290,<br>0.0235 | 0.240,<br>-0.0248,<br>0.0273,<br>0.0237 | 0.088,<br>-0.0073,<br>0.0264,<br>0.0239 | 0.076,<br>0.0004,<br>0.0262,<br>0.024    | 0.078,<br>0.0083,<br>0.0266,<br>0.0241 | 0.229,<br>0.0248,<br>0.0280,<br>0.0243  | 0.478,<br>0.0427,<br>0.0301,<br>0.0247 | 0.883,<br>0.0916,<br>0.0322,<br>0.0253  |
| cML-MA-BIC         | 0.995,<br>-0.0998,<br>0.0216,<br>0.0214 | 0.624,<br>-0.0498,<br>0.0220,<br>0.0218 | 0.284,<br>-0.0299,<br>0.0221,<br>0.022  | 0.067,<br>-0.0100,<br>0.0224,<br>0.0222 | 0.047,<br>-0.0001,<br>0.0225,<br>0.0223  | 0.072,<br>0.0099,<br>0.0226,<br>0.0225 | 0.276,<br>0.0298,<br>0.0229,<br>0.0227  | 0.600,<br>0.0498,<br>0.0232,<br>0.0229 | 0.983,<br>0.0998,<br>0.0239,<br>0.0236  |
| cML-MA-BIC-Profile | 0.995,<br>-0.0998,<br>0.0216,<br>0.0215 | 0.622,<br>-0.0498,<br>0.0220,<br>0.0219 | 0.282,<br>-0.0299,<br>0.0221,<br>0.0221 | 0.067,<br>-0.0100,<br>0.0224,<br>0.0223 | 0.048,<br>-0.0001,<br>0.0225,<br>0.0224  | 0.072,<br>0.0099,<br>0.0226,<br>0.0225 | 0.275,<br>0.0298,<br>0.0229,<br>0.0227  | 0.597,<br>0.0498,<br>0.0232,<br>0.023  | 0.983,<br>0.0998,<br>0.0239,<br>0.0236  |
| cML-BIC            | 0.995,<br>-0.0999,<br>0.0216,<br>0.0212 | 0.636,<br>-0.0499,<br>0.0220,<br>0.0216 | 0.292,<br>-0.0299,<br>0.0222,<br>0.0217 | 0.070,<br>-0.0100,<br>0.0226,<br>0.0219 | 0.051,<br>0.0001,<br>0.0227,<br>0.022    | 0.073,<br>0.0101,<br>0.0228,<br>0.0222 | 0.293,<br>0.0301,<br>0.0230,<br>0.0224  | 0.606,<br>0.0500,<br>0.0232,<br>0.0226 | 0.985,<br>0.1000,<br>0.0240,<br>0.0233  |
| cML-BIC-Profile    | 0.995,<br>-0.0999,<br>0.0216,<br>0.0212 | 0.635,<br>-0.0499,<br>0.0220,<br>0.0216 | 0.292,<br>-0.0299,<br>0.0222,<br>0.0218 | 0.070,<br>-0.0100,<br>0.0226,<br>0.022  | 0.051,<br>0.0001,<br>0.0227,<br>0.0221   | 0.073,<br>0.0101,<br>0.0228,<br>0.0222 | 0.291,<br>0.0301,<br>0.0230,<br>0.0224  | 0.605,<br>0.0500,<br>0.0232,<br>0.0227 | 0.986,<br>0.1000,<br>0.0240,<br>0.0233  |
| MR-Mix             | 0.973,<br>-0.1043,<br>0.0241,<br>0.027  | 0.487,<br>-0.0509,<br>0.0240,<br>0.0269 | 0.191,<br>-0.0303,<br>0.0240,<br>0.0269 | 0.044,<br>-0.0101,<br>0.0241,<br>0.027  | 0.029,<br>0.0000,<br>0.0240,<br>0.0272   | 0.050,<br>0.0099,<br>0.0241,<br>0.0297 | 0.188,<br>0.0294,<br>0.0241,<br>0.0275  | 0.468,<br>0.0487,<br>0.0241,<br>0.0275 | 0.937,<br>0.0946,<br>0.0240,<br>0.0273  |
| MR-ContMix         | 0.992,<br>-0.1001,<br>0.0224,<br>NA     | 0.658,<br>-0.0502,<br>0.0228,<br>NA     | 0.330,<br>-0.0303,<br>0.0229,<br>NA     | 0.098,<br>-0.0103,<br>0.0232,<br>NA     | 0.069,<br>-0.0003,<br>0.0233,<br>NA      | 0.102,<br>0.0097,<br>0.0234,<br>NA     | 0.316,<br>0.0296,<br>0.0237,<br>NA      | 0.628,<br>0.0496,<br>0.0239,<br>NA     | 0.980,<br>0.0996,<br>0.0247,<br>NA      |
| MR-Lasso           | 0.987,<br>-0.0991,<br>0.0450,<br>0.0237 | 0.565,<br>-0.0492,<br>0.0452,<br>0.0242 | 0.247,<br>-0.0293,<br>0.0453,<br>0.0244 | 0.060,<br>-0.0097,<br>0.0370,<br>0.0247 | 0.044,<br>0.0003,<br>0.0370,<br>0.0248   | 0.066,<br>0.0103,<br>0.0372,<br>0.0249 | 0.241,<br>0.0303,<br>0.0373,<br>0.0251  | 0.544,<br>0.0503,<br>0.0375,<br>0.0254 | 0.957,<br>0.1000,<br>0.0382,<br>0.026   |
| MR-PRESSO          | 0.313,<br>-0.0449,<br>0.3250,<br>0.2057 | 0.197,<br>0.0051,<br>0.3247,<br>0.2028  | 0.145,<br>0.0254,<br>0.3243,<br>0.2015  | 0.111,<br>0.0450,<br>0.3242,<br>0.2006  | 0.111,<br>0.0551,<br>0.3240,<br>0.2002   | 0.114,<br>0.0650,<br>0.3240,<br>0.1999 | 0.164,<br>0.0849,<br>0.3237,<br>0.198   | 0.228,<br>0.1044,<br>0.3237,<br>0.1971 | 0.357,<br>0.1534,<br>0.3231,<br>0.1931  |
| MR-IVW             | 0.091,<br>-0.0440,<br>0.3323,<br>0.3299 | 0.089,<br>0.0062,<br>0.3323,<br>0.3299  | 0.084,<br>0.0263,<br>0.3323,<br>0.3299  | 0.085,<br>0.0464,<br>0.3323,<br>0.3299  | 0.085,<br>0.0565,<br>0.3323,<br>0.3299   | 0.085,<br>0.0665,<br>0.3323,<br>0.3299 | 0.090,<br>0.0866,<br>0.3324,<br>0.3298  | 0.090,<br>0.1067,<br>0.3324,<br>0.3298 | 0.095,<br>0.1568,<br>0.3324,<br>0.3298  |
| MR-IVW-Oracle      | 0.990,<br>-0.0998,<br>0.0215,<br>0.0233 | 0.561,<br>-0.0499,<br>0.0219,<br>0.0238 | 0.237,<br>-0.0299,<br>0.0221,<br>0.024  | 0.053,<br>-0.0099,<br>0.0223,<br>0.0242 | 0.037,<br>0.0000,<br>0.0224,<br>0.0244   | 0.058,<br>0.0100,<br>0.0225,<br>0.0245 | 0.229,<br>0.0300,<br>0.0227,<br>0.0247  | 0.540,<br>0.0499,<br>0.0230,<br>0.025  | 0.964,<br>0.0998,<br>0.0236,<br>0.0257  |
| MR-Egger           | 0.235,<br>0.4847,<br>1.5839,<br>1.191   | 0.237,<br>0.5332,<br>1.5840,<br>1.191   | 0.240,<br>0.5526,<br>1.5840,<br>1.191   | 0.240,<br>0.5720,<br>1.5840,<br>1.191   | 0.240,<br>0.5816,<br>1.5840,<br>1.191    | 0.239,<br>0.5913,<br>1.5841,<br>1.191  | 0.239,<br>0.6107,<br>1.5841,<br>1.191   | 0.243,<br>0.6300,<br>1.5841,<br>1.191  | 0.238,<br>0.6784,<br>1.5842,<br>1.192   |
| MR-Weighted-Median | 0.941,<br>-0.1013,<br>0.0325,<br>0.0276 | 0.461,<br>-0.0528,<br>0.0341,<br>0.0281 | 0.214,<br>-0.0335,<br>0.0350,<br>0.0284 | 0.093,<br>-0.0141,<br>0.0359,<br>0.0286 | 0.072,<br>-0.0045,<br>0.0364,<br>0.0288  | 0.080,<br>0.0051,<br>0.0369,<br>0.0289 | 0.171,<br>0.0244,<br>0.0380,<br>0.0293  | 0.388,<br>0.0437,<br>0.0394,<br>0.0296 | 0.851,<br>0.0916,<br>0.0427,<br>0.0306  |
| MR-Weighted-Mode   | 0.981,<br>-0.0995,<br>0.0328,<br>0.0284 | 0.530,<br>-0.0501,<br>0.0329,<br>0.0289 | 0.218,<br>-0.0304,<br>0.0328,<br>0.0291 | 0.059,<br>-0.0106,<br>0.0330,<br>0.0295 | 0.040,<br>-0.0008,<br>0.0330,<br>0.0295  | 0.056,<br>0.0091,<br>0.0331,<br>0.0297 | 0.212,<br>0.0291,<br>0.0333,<br>0.0299  | 0.522,<br>0.0488,<br>0.0336,<br>0.0301 | 0.943,<br>0.0976,<br>0.0400,<br>0.0311  |
| MR-RAPS1           | 0.099,<br>-0.0479,<br>0.3240,<br>0.3135 | 0.097,<br>0.0022,<br>0.3240,<br>0.3135  | 0.092,<br>0.0222,<br>0.3241,<br>0.3135  | 0.088,<br>0.0422,<br>0.3241,<br>0.3135  | 0.087,<br>0.0522,<br>0.3241,<br>0.3135   | 0.087,<br>0.0622,<br>0.3241,<br>0.3135 | 0.087,<br>0.0822,<br>0.3241,<br>0.3135  | 0.089,<br>0.1022,<br>0.3242,<br>0.3135 | 0.101,<br>0.1523,<br>0.3243,<br>0.3136  |
| MR-RAPS2           | 0.106,<br>-0.0890,<br>0.3025,<br>0.2722 | 0.088,<br>-0.0380,<br>0.2975,<br>0.2783 | 0.086,<br>-0.0171,<br>0.2906,<br>0.2816 | 0.079,<br>0.0049,<br>0.2950,<br>0.2842  | 0.078,<br>0.0542,<br>0.9588,<br>0.2888   | 0.077,<br>0.0408,<br>0.4487,<br>0.2898 | 0.074,<br>0.0507,<br>0.2983,<br>0.292   | 0.078,<br>0.0725,<br>0.3025,<br>0.2951 | 0.085,<br>0.1242,<br>0.3063,<br>0.3023  |
| MR-RAPS3           | 0.922,<br>-2.5105,<br>56.1160,<br>128.2 | 0.919,<br>0.4746,<br>27.9686,<br>42.39  | 0.922,<br>1.8887,<br>57.6319,<br>167.6  | 0.929,<br>-1.3272,<br>50.4485,<br>126.7 | 0.937,<br>30.6530,<br>894.6462,<br>30780 | 0.936,<br>0.6059,<br>7.9225,<br>2.882  | 0.931,<br>-2.4818,<br>58.5677,<br>539   | 0.938,<br>0.1966,<br>11.4127,<br>7.026 | 0.935,<br>0.2288,<br>9.1694,<br>4.466   |
| MR-RAPS4           | 0.978,<br>-0.1546,<br>10.1909,<br>0.471 | 0.970,<br>0.0731,<br>8.2261,<br>0.712   | 0.963,<br>0.1687,<br>7.9969,<br>2.363   | 0.950,<br>-0.0474,<br>4.9448,<br>0.452  | 0.952,<br>-0.0736,<br>5.1400,<br>0.5624  | 0.948,<br>-0.0663,<br>5.1935,<br>2.667 | 0.960,<br>-0.0506,<br>5.2175,<br>0.7871 | 0.965,<br>-0.0820,<br>5.2784,<br>1.371 | 0.985,<br>-0.2449,<br>8.5402,<br>0.3131 |



Table S43: Main simulations: in each cell, from top to bottom are empirical type-I error/power, mean( $\hat{\theta}$ ), SD( $\hat{\theta}$ ), mean(SE( $\hat{\theta}$ )) when  $m = 10$ , the InSIDE violated,  $q = 0.4$ , and  $n = 200000$ .

| Methods \ $\theta$ | -0.1                                      | -0.05                                    | -0.03                                   | -0.01                                     | 0                                          | 0.01                                    | 0.03                                    | 0.05                                        | 0.1                                     |
|--------------------|-------------------------------------------|------------------------------------------|-----------------------------------------|-------------------------------------------|--------------------------------------------|-----------------------------------------|-----------------------------------------|---------------------------------------------|-----------------------------------------|
| cML-MA-AIC         | 0.977,<br>-0.0903,<br>0.0189,<br>0.0202   | 0.538,<br>-0.0408,<br>0.0184,<br>0.0203  | 0.193,<br>-0.0224,<br>0.0169,<br>0.02   | 0.025,<br>-0.0068,<br>0.0147,<br>0.0197   | 0.011,<br>0.0001,<br>0.0143,<br>0.0196     | 0.028,<br>0.0070,<br>0.0147,<br>0.0199  | 0.183,<br>0.0222,<br>0.0173,<br>0.0207  | 0.479,<br>0.0402,<br>0.0194,<br>0.0213      | 0.957,<br>0.0893,<br>0.0210,<br>0.0222  |
| cML-MA-AIC-Profile | 0.977,<br>-0.0905,<br>0.0189,<br>0.0202   | 0.536,<br>-0.0408,<br>0.0184,<br>0.0203  | 0.192,<br>-0.0224,<br>0.0169,<br>0.02   | 0.025,<br>-0.0068,<br>0.0147,<br>0.0197   | 0.011,<br>0.0001,<br>0.0143,<br>0.0197     | 0.027,<br>0.0070,<br>0.0147,<br>0.0199  | 0.182,<br>0.0222,<br>0.0173,<br>0.0207  | 0.479,<br>0.0402,<br>0.0194,<br>0.0213      | 0.957,<br>0.0894,<br>0.0211,<br>0.0222  |
| cML-AIC            | 0.989,<br>-0.0949,<br>0.0208,<br>0.0162   | 0.749,<br>-0.0452,<br>0.0206,<br>0.0165  | 0.413,<br>-0.0258,<br>0.0199,<br>0.0166 | 0.101,<br>-0.0083,<br>0.0186,<br>0.0168   | 0.062,<br>0.0002,<br>0.0182,<br>0.0169     | 0.094,<br>0.0083,<br>0.0185,<br>0.017   | 0.365,<br>0.0254,<br>0.0205,<br>0.0172  | 0.707,<br>0.0442,<br>0.0219,<br>0.0175      | 0.971,<br>0.0938,<br>0.0235,<br>0.0179  |
| cML-AIC-Profile    | 0.989,<br>-0.0952,<br>0.0206,<br>0.0162   | 0.749,<br>-0.0452,<br>0.0206,<br>0.0165  | 0.413,<br>-0.0258,<br>0.0199,<br>0.0167 | 0.101,<br>-0.0083,<br>0.0186,<br>0.0168   | 0.062,<br>0.0002,<br>0.0182,<br>0.0169     | 0.093,<br>0.0083,<br>0.0185,<br>0.017   | 0.362,<br>0.0254,<br>0.0205,<br>0.0173  | 0.706,<br>0.0442,<br>0.0219,<br>0.0175      | 0.971,<br>0.0939,<br>0.0235,<br>0.0179  |
| cML-MA-BIC         | 1.000,<br>-0.0998,<br>0.0154,<br>0.0151   | 0.891,<br>-0.0499,<br>0.0156,<br>0.0154  | 0.503,<br>-0.0299,<br>0.0157,<br>0.0155 | 0.101,<br>-0.0100,<br>0.0159,<br>0.0157   | 0.044,<br>-0.0001,<br>0.0159,<br>0.0157    | 0.099,<br>0.0099,<br>0.0160,<br>0.0158  | 0.468,<br>0.0298,<br>0.0162,<br>0.016   | 0.870,<br>0.0498,<br>0.0163,<br>0.0161      | 1.000,<br>0.0998,<br>0.0168,<br>0.0166  |
| cML-MA-BIC-Profile | 1.000,<br>-0.0999,<br>0.0154,<br>0.0151   | 0.891,<br>-0.0499,<br>0.0156,<br>0.0154  | 0.501,<br>-0.0299,<br>0.0157,<br>0.0155 | 0.101,<br>-0.0100,<br>0.0159,<br>0.0157   | 0.044,<br>-0.0001,<br>0.0159,<br>0.0157    | 0.099,<br>0.0099,<br>0.0160,<br>0.0158  | 0.467,<br>0.0298,<br>0.0162,<br>0.016   | 0.870,<br>0.0498,<br>0.0163,<br>0.0162      | 1.000,<br>0.0998,<br>0.0168,<br>0.0166  |
| cML-BIC            | 1.000,<br>-0.0999,<br>0.0153,<br>0.015    | 0.894,<br>-0.0500,<br>0.0156,<br>0.0153  | 0.508,<br>-0.0300,<br>0.0157,<br>0.0154 | 0.105,<br>-0.0100,<br>0.0158,<br>0.0155   | 0.045,<br>-0.0001,<br>0.0159,<br>0.0156    | 0.103,<br>0.0100,<br>0.0161,<br>0.0157  | 0.480,<br>0.0300,<br>0.0162,<br>0.0158  | 0.874,<br>0.0500,<br>0.0164,<br>0.016       | 1.000,<br>0.0999,<br>0.0170,<br>0.0165  |
| cML-BIC-Profile    | 1.000,<br>-0.0999,<br>0.0153,<br>0.015    | 0.893,<br>-0.0500,<br>0.0156,<br>0.0153  | 0.508,<br>-0.0300,<br>0.0157,<br>0.0154 | 0.105,<br>-0.0100,<br>0.0158,<br>0.0155   | 0.045,<br>-0.0001,<br>0.0159,<br>0.0156    | 0.102,<br>0.0100,<br>0.0161,<br>0.0157  | 0.479,<br>0.0300,<br>0.0162,<br>0.0158  | 0.874,<br>0.0500,<br>0.0164,<br>0.016       | 1.000,<br>0.0999,<br>0.0170,<br>0.0165  |
| MR-Mix             | 0.999,<br>-0.1042,<br>0.0176,<br>0.0191   | 0.782,<br>-0.0513,<br>0.0174,<br>0.0191  | 0.361,<br>-0.0305,<br>0.0174,<br>0.019  | 0.071,<br>-0.0102,<br>0.0174,<br>0.0191   | 0.032,<br>-0.0001,<br>0.0174,<br>0.0191    | 0.068,<br>0.0099,<br>0.0175,<br>0.0191  | 0.346,<br>0.0293,<br>0.0175,<br>0.0191  | 0.729,<br>0.0483,<br>0.0174,<br>0.0191      | 0.996,<br>0.0943,<br>0.0173,<br>0.0192  |
| MR-ContMix         | 0.999,<br>-0.0998,<br>0.0158,<br>NA       | 0.900,<br>-0.0499,<br>0.0161,<br>NA      | 0.550,<br>-0.0300,<br>0.0163,<br>NA     | 0.126,<br>-0.0100,<br>0.0164,<br>NA       | 0.058,<br>0.0000,<br>0.0164,<br>NA         | 0.135,<br>0.0100,<br>0.0165,<br>NA      | 0.510,<br>0.0299,<br>0.0167,<br>NA      | 0.880,<br>0.0498,<br>0.0169,<br>NA          | 1.000,<br>0.0997,<br>0.0174,<br>NA      |
| MR-Lasso           | 0.997,<br>-0.0998,<br>0.0480,<br>0.0173   | 0.843,<br>-0.0496,<br>0.0470,<br>0.0175  | 0.450,<br>-0.0297,<br>0.0470,<br>0.0177 | 0.095,<br>-0.0097,<br>0.0471,<br>0.0178   | 0.046,<br>0.0003,<br>0.0471,<br>0.0179     | 0.085,<br>0.0103,<br>0.0471,<br>0.018   | 0.400,<br>0.0302,<br>0.0472,<br>0.0182  | 0.815,<br>0.0502,<br>0.0473,<br>0.0183      | 0.996,<br>0.1002,<br>0.0475,<br>0.0188  |
| MR-PRESSO          | 0.306,<br>-0.0679,<br>0.3504,<br>0.239    | 0.234,<br>-0.0180,<br>0.3504,<br>0.2378  | 0.169,<br>0.0022,<br>0.3504,<br>0.2378  | 0.112,<br>0.0219,<br>0.3503,<br>0.2368    | 0.103,<br>0.0319,<br>0.3503,<br>0.2368     | 0.112,<br>0.0419,<br>0.3503,<br>0.2368  | 0.175,<br>0.0621,<br>0.3502,<br>0.2353  | 0.239,<br>0.0823,<br>0.3501,<br>0.2351      | 0.322,<br>0.1322,<br>0.3500,<br>0.2328  |
| MR-IVW             | 0.107,<br>-0.0671,<br>0.3524,<br>0.3309   | 0.101,<br>-0.0168,<br>0.3524,<br>0.3309  | 0.101,<br>0.0033,<br>0.3524,<br>0.3308  | 0.102,<br>0.0234,<br>0.3524,<br>0.3308    | 0.102,<br>0.0334,<br>0.3524,<br>0.3308     | 0.104,<br>0.0435,<br>0.3524,<br>0.3308  | 0.107,<br>0.0636,<br>0.3524,<br>0.3308  | 0.110,<br>0.0837,<br>0.3524,<br>0.3308      | 0.119,<br>0.1339,<br>0.3524,<br>0.3307  |
| MR-IVW-Oracle      | 0.999,<br>-0.0998,<br>0.0153,<br>0.0164   | 0.844,<br>-0.0499,<br>0.0155,<br>0.0167  | 0.447,<br>-0.0300,<br>0.0156,<br>0.0168 | 0.090,<br>-0.0100,<br>0.0158,<br>0.017    | 0.039,<br>0.0000,<br>0.0158,<br>0.0171     | 0.079,<br>0.0099,<br>0.0159,<br>0.0172  | 0.403,<br>0.0299,<br>0.0161,<br>0.0173  | 0.819,<br>0.0499,<br>0.0162,<br>0.0175      | 0.999,<br>0.0998,<br>0.0167,<br>0.018   |
| MR-Egger           | 0.240,<br>0.4842,<br>1.6226,<br>1.1645    | 0.244,<br>0.5335,<br>1.6225,<br>1.1645   | 0.248,<br>0.5533,<br>1.6224,<br>1.1645  | 0.248,<br>0.5730,<br>1.6224,<br>1.1646    | 0.249,<br>0.5828,<br>1.6224,<br>1.1646     | 0.249,<br>0.5927,<br>1.6223,<br>1.1646  | 0.249,<br>0.6124,<br>1.6223,<br>1.1646  | 0.251,<br>0.6321,<br>1.6222,<br>1.1646      | 0.254,<br>0.6813,<br>1.6221,<br>1.1646  |
| MR-Weighted-Median | 0.997,<br>-0.1018,<br>0.0297,<br>0.0198   | 0.748,<br>-0.0534,<br>0.0301,<br>0.0201  | 0.402,<br>-0.0340,<br>0.0308,<br>0.0203 | 0.124,<br>-0.0147,<br>0.0317,<br>0.0205   | 0.070,<br>-0.0050,<br>0.0322,<br>0.0206    | 0.084,<br>0.0047,<br>0.0327,<br>0.0207  | 0.285,<br>0.0240,<br>0.0337,<br>0.021   | 0.610,<br>0.0434,<br>0.0350,<br>0.0212      | 0.965,<br>0.0916,<br>0.0389,<br>0.0219  |
| MR-Weighted-Mode   | 0.996,<br>-0.1005,<br>0.0238,<br>0.0181   | 0.817,<br>-0.0504,<br>0.0240,<br>0.0185  | 0.420,<br>-0.0307,<br>0.0240,<br>0.0186 | 0.075,<br>-0.0109,<br>0.0241,<br>0.0188   | 0.039,<br>-0.0009,<br>0.0243,<br>0.019     | 0.080,<br>0.0090,<br>0.0244,<br>0.019   | 0.378,<br>0.0286,<br>0.0248,<br>0.0192  | 0.788,<br>0.0492,<br>0.0252,<br>0.0195      | 0.991,<br>0.0961,<br>0.0497,<br>0.0201  |
| MR-RAPS1           | 0.117,<br>-0.0692,<br>0.3419,<br>0.314    | 0.115,<br>-0.0192,<br>0.3420,<br>0.314   | 0.112,<br>0.0008,<br>0.3420,<br>0.314   | 0.108,<br>0.0208,<br>0.3420,<br>0.314     | 0.113,<br>0.0308,<br>0.3420,<br>0.314      | 0.111,<br>0.0408,<br>0.3421,<br>0.314   | 0.112,<br>0.0608,<br>0.3421,<br>0.314   | 0.112,<br>0.0808,<br>0.3421,<br>0.314       | 0.126,<br>0.1308,<br>0.3422,<br>0.314   |
| MR-RAPS2           | 0.162,<br>-0.1226,<br>0.2282,<br>0.1941   | 0.106,<br>-0.0766,<br>0.2639,<br>0.1937  | 0.089,<br>-0.0552,<br>0.2345,<br>0.1949 | 0.080,<br>-0.0318,<br>0.2336,<br>0.1983   | 0.073,<br>-0.0226,<br>0.2395,<br>0.1985    | 0.067,<br>-0.0219,<br>0.3510,<br>0.2008 | 0.073,<br>0.0055,<br>0.2482,<br>0.2016  | 0.071,<br>0.0248,<br>0.2619,<br>0.2009      | 0.077,<br>0.0748,<br>0.2411,<br>0.2031  |
| MR-RAPS3           | 0.940,<br>-2.8247,<br>45.3076,<br>52.1233 | 0.948,<br>1.3487,<br>37.0838,<br>38.0906 | 0.953,<br>0.3711,<br>16.2788,<br>7.362  | 0.939,<br>2.7406,<br>82.6052,<br>127.3877 | 0.934,<br>-1.7006,<br>55.5342,<br>167.3854 | 0.932,<br>0.0982,<br>11.3167,<br>6.5138 | 0.953,<br>0.1190,<br>17.1701,<br>9.3429 | 0.956,<br>-5.8855,<br>174.8939,<br>804.4194 | 0.955,<br>0.9751,<br>17.4681,<br>7.0265 |
| MR-RAPS4           | 1.000,<br>-0.0657,<br>0.1245,<br>0.0117   | 0.965,<br>-0.0174,<br>0.2065,<br>0.0122  | 0.735,<br>0.0086,<br>0.2540,<br>0.0127  | 0.399,<br>0.0330,<br>0.2728,<br>0.0129    | 0.344,<br>0.0416,<br>0.2802,<br>0.013      | 0.399,<br>0.0602,<br>0.2599,<br>0.0129  | 0.723,<br>0.0560,<br>0.2086,<br>0.0127  | 0.959,<br>0.0701,<br>0.1616,<br>0.0126      | 1.000,<br>0.1159,<br>0.1038,<br>0.0129  |

Table S44: Main simulations: in each cell, from top to bottom are empirical type-I error/power, mean( $\hat{\theta}$ ), SD( $\hat{\theta}$ ), mean(SE( $\hat{\theta}$ )) when  $m = 10$ , the InSIDE violated,  $q = 0.6$ , and  $n = 50000$ .

| Methods \ $\theta$ | -0.1                                      | -0.05                                     | -0.03                                        | -0.01                                       | 0                                       | 0.01                                     | 0.03                                      | 0.05                                        | 0.1                                      |
|--------------------|-------------------------------------------|-------------------------------------------|----------------------------------------------|---------------------------------------------|-----------------------------------------|------------------------------------------|-------------------------------------------|---------------------------------------------|------------------------------------------|
| cML-MA-AIC         | 0.448,<br>-0.0825,<br>0.0411,<br>0.047    | 0.084,<br>-0.0367,<br>0.0369,<br>0.0473   | 0.036,<br>-0.0208,<br>0.0348,<br>0.0473      | 0.013,<br>-0.0064,<br>0.0334,<br>0.0475     | 0.008,<br>0.0001,<br>0.0335,<br>0.0477  | 0.014,<br>0.0069,<br>0.0339,<br>0.048    | 0.033,<br>0.0214,<br>0.0358,<br>0.0487    | 0.076,<br>0.0363,<br>0.0392,<br>0.0495      | 0.363,<br>0.0801,<br>0.0455,<br>0.0515   |
| cML-MA-AIC-Profile | 0.445,<br>-0.0826,<br>0.0412,<br>0.0473   | 0.084,<br>-0.0367,<br>0.0369,<br>0.0476   | 0.035,<br>-0.0208,<br>0.0348,<br>0.0477      | 0.013,<br>-0.0064,<br>0.0334,<br>0.0478     | 0.008,<br>0.0001,<br>0.0335,<br>0.048   | 0.013,<br>0.0069,<br>0.0339,<br>0.0483   | 0.032,<br>0.0214,<br>0.0358,<br>0.049     | 0.076,<br>0.0363,<br>0.0394,<br>0.0498      | 0.363,<br>0.0801,<br>0.0455,<br>0.0518   |
| cML-AIC            | 0.639,<br>-0.0889,<br>0.0469,<br>0.04     | 0.210,<br>-0.0416,<br>0.0441,<br>0.0407   | 0.112,<br>-0.0241,<br>0.0429,<br>0.0411      | 0.057,<br>-0.0076,<br>0.0422,<br>0.0416     | 0.050,<br>0.0002,<br>0.0425,<br>0.0418  | 0.051,<br>0.0080,<br>0.0430,<br>0.042    | 0.087,<br>0.0241,<br>0.0444,<br>0.0423    | 0.181,<br>0.0401,<br>0.0472,<br>0.0429      | 0.558,<br>0.0864,<br>0.0523,<br>0.0441   |
| cML-AIC-Profile    | 0.638,<br>-0.0890,<br>0.0470,<br>0.0403   | 0.205,<br>-0.0416,<br>0.0441,<br>0.041    | 0.111,<br>-0.0241,<br>0.0429,<br>0.0414      | 0.056,<br>-0.0076,<br>0.0422,<br>0.0419     | 0.049,<br>0.0002,<br>0.0425,<br>0.0421  | 0.049,<br>0.0080,<br>0.0430,<br>0.0423   | 0.085,<br>0.0241,<br>0.0444,<br>0.0426    | 0.178,<br>0.0401,<br>0.0474,<br>0.0432      | 0.551,<br>0.0864,<br>0.0523,<br>0.0444   |
| cML-MA-BIC         | 0.768,<br>-0.1008,<br>0.0372,<br>0.0379   | 0.259,<br>-0.0506,<br>0.0377,<br>0.0386   | 0.124,<br>-0.0307,<br>0.0379,<br>0.0389      | 0.055,<br>-0.0107,<br>0.0382,<br>0.0392     | 0.044,<br>-0.0008,<br>0.0384,<br>0.0394 | 0.044,<br>0.0091,<br>0.0386,<br>0.0396   | 0.095,<br>0.0291,<br>0.0391,<br>0.04      | 0.219,<br>0.0488,<br>0.0395,<br>0.0404      | 0.673,<br>0.0989,<br>0.0410,<br>0.0415   |
| cML-MA-BIC-Profile | 0.766,<br>-0.0993,<br>0.0591,<br>0.0388   | 0.256,<br>-0.0490,<br>0.0634,<br>0.0393   | 0.125,<br>-0.0290,<br>0.0648,<br>0.0395      | 0.056,<br>-0.0090,<br>0.0617,<br>0.0398     | 0.044,<br>0.0009,<br>0.0667,<br>0.0399  | 0.045,<br>0.0109,<br>0.0672,<br>0.0401   | 0.096,<br>0.0309,<br>0.0683,<br>0.0405    | 0.217,<br>0.0507,<br>0.0693,<br>0.0408      | 0.667,<br>1.0008,<br>0.0713,<br>0.0419   |
| cML-BIC            | 0.783,<br>-0.1012,<br>0.0374,<br>0.0375   | 0.267,<br>-0.0509,<br>0.0381,<br>0.0381   | 0.132,<br>-0.0309,<br>0.0383,<br>0.0384      | 0.058,<br>-0.0108,<br>0.0386,<br>0.0388     | 0.047,<br>-0.0008,<br>0.0388,<br>0.0389 | 0.050,<br>0.0093,<br>0.0391,<br>0.0391   | 0.102,<br>0.0293,<br>0.0395,<br>0.0395    | 0.229,<br>0.0492,<br>0.0396,<br>0.0399      | 0.682,<br>0.0995,<br>0.0408,<br>0.0411   |
| cML-BIC-Profile    | 0.781,<br>-0.0992,<br>0.0717,<br>0.0377   | 0.264,<br>-0.0490,<br>0.0721,<br>0.0383   | 0.132,<br>-0.0290,<br>0.0722,<br>0.0386      | 0.059,<br>-0.0089,<br>0.0724,<br>0.039      | 0.047,<br>0.0012,<br>0.0726,<br>0.0392  | 0.050,<br>0.0112,<br>0.0727,<br>0.0393   | 0.102,<br>0.0313,<br>0.0729,<br>0.0397    | 0.228,<br>0.0512,<br>0.0730,<br>0.0401      | 0.677,<br>1.0104,<br>0.0737,<br>0.0413   |
| MR-Mix             | 0.726,<br>-0.1045,<br>0.0395,<br>0.0423   | 0.219,<br>-0.0516,<br>0.0396,<br>0.0419   | 0.100,<br>-0.0313,<br>0.0395,<br>0.0419      | 0.051,<br>-0.0111,<br>0.0397,<br>0.042      | 0.041,<br>-0.0010,<br>0.0397,<br>0.0419 | 0.044,<br>0.0089,<br>0.0396,<br>0.0419   | 0.093,<br>0.0283,<br>0.0395,<br>0.0419    | 0.195,<br>0.0472,<br>0.0394,<br>0.0419      | 0.628,<br>0.0931,<br>0.0399,<br>0.0421   |
| MR-ContMix         | 0.801,<br>-0.1011,<br>0.0385,<br>NA       | 0.305,<br>-0.0510,<br>0.0394,<br>NA       | 0.171,<br>-0.0310,<br>0.0400,<br>NA          | 0.086,<br>-0.0111,<br>0.0403,<br>NA         | 0.070,<br>-0.0011,<br>0.0406,<br>NA     | 0.076,<br>0.0090,<br>0.0408,<br>NA       | 0.128,<br>0.0287,<br>0.0440,<br>NA        | 0.266,<br>0.0487,<br>0.0444,<br>NA          | 0.714,<br>0.0988,<br>0.0462,<br>NA       |
| MR-Lasso           | 0.736,<br>-0.0499,<br>0.3745,<br>0.0678   | 0.321,<br>-0.0003,<br>0.3767,<br>0.0682   | 0.229,<br>0.0195,<br>0.3775,<br>0.0688       | 0.174,<br>0.0390,<br>0.3741,<br>0.0691      | 0.168,<br>0.0497,<br>0.3746,<br>0.0697  | 0.163,<br>0.0597,<br>0.3753,<br>0.0699   | 0.194,<br>0.0799,<br>0.3755,<br>0.07      | 0.272,<br>0.1004,<br>0.3785,<br>0.0708      | 0.613,<br>1.1503,<br>0.3794,<br>0.0725   |
| MR-PRESSO          | 0.246,<br>-0.0304,<br>0.4048,<br>0.2281   | 0.140,<br>0.0183,<br>0.4046,<br>0.2254    | 0.122,<br>0.0382,<br>0.4042,<br>0.2248       | 0.110,<br>0.0584,<br>0.4039,<br>0.2243      | 0.110,<br>0.0678,<br>0.4038,<br>0.2234  | 0.107,<br>0.0776,<br>0.4037,<br>0.223    | 0.117,<br>0.0978,<br>0.4040,<br>0.2217    | 0.143,<br>0.1169,<br>0.4034,<br>0.2195      | 0.246,<br>0.1663,<br>0.4028,<br>0.2172   |
| MR-IVW             | 0.105,<br>-0.0306,<br>0.4136,<br>0.4028   | 0.100,<br>0.0198,<br>0.4136,<br>0.4027    | 0.103,<br>0.0400,<br>0.4136,<br>0.4027       | 0.101,<br>0.0601,<br>0.4136,<br>0.4027      | 0.099,<br>0.0702,<br>0.4136,<br>0.4027  | 0.103,<br>0.0803,<br>0.4136,<br>0.4027   | 0.102,<br>0.1004,<br>0.4136,<br>0.4026    | 0.104,<br>0.1205,<br>0.4136,<br>0.4026      | 0.111,<br>1.1708,<br>0.4135,<br>0.4026   |
| MR-IVW-Oracle      | 0.713,<br>-0.1010,<br>0.0366,<br>0.0413   | 0.212,<br>-0.0510,<br>0.0373,<br>0.0422   | 0.105,<br>-0.0310,<br>0.0376,<br>0.0425      | 0.044,<br>-0.0110,<br>0.0380,<br>0.0429     | 0.036,<br>-0.0010,<br>0.0382,<br>0.0431 | 0.038,<br>0.0090,<br>0.0384,<br>0.0433   | 0.081,<br>0.0290,<br>0.0388,<br>0.0437    | 0.181,<br>0.0490,<br>0.0392,<br>0.0442      | 0.609,<br>0.0991,<br>0.0404,<br>0.0454   |
| MR-Egger           | 0.201,<br>0.6599,<br>1.5413,<br>1.2434    | 0.201,<br>0.7079,<br>1.5412,<br>1.2435    | 0.205,<br>0.7271,<br>1.5411,<br>1.2436       | 0.205,<br>0.7463,<br>1.5410,<br>1.2437      | 0.205,<br>0.7559,<br>1.5410,<br>1.2437  | 0.205,<br>0.7655,<br>1.5410,<br>1.2437   | 0.204,<br>0.7846,<br>1.5409,<br>1.2438    | 0.204,<br>0.8038,<br>1.5409,<br>1.2439      | 0.216,<br>0.8517,<br>1.5408,<br>1.2441   |
| MR-Weighted-Median | 0.638,<br>-0.1093,<br>0.1281,<br>0.0502   | 0.314,<br>-0.0676,<br>0.1306,<br>0.0509   | 0.226,<br>-0.0507,<br>0.1323,<br>0.0513      | 0.187,<br>-0.0342,<br>0.1346,<br>0.0517     | 0.174,<br>-0.0256,<br>0.1360,<br>0.0519 | 0.178,<br>-0.0175,<br>0.1366,<br>0.0522  | 0.199,<br>-0.0013,<br>0.1388,<br>0.0527   | 0.255,<br>0.0155,<br>0.1421,<br>0.0532      | 0.484,<br>0.0572,<br>1.1501,<br>0.0547   |
| MR-Weighted-Mode   | 0.749,<br>-0.1287,<br>0.2185,<br>0.0473   | 0.718,<br>-0.0924,<br>0.2217,<br>0.0476   | 0.704,<br>-0.0779,<br>0.2227,<br>0.0479      | 0.691,<br>-0.0635,<br>0.2247,<br>0.048      | 0.694,<br>-0.0561,<br>0.2257,<br>0.0481 | 0.688,<br>-0.0488,<br>0.2265,<br>0.0482  | 0.680,<br>-0.0341,<br>0.2280,<br>0.0485   | 0.681,<br>-0.0204,<br>0.2307,<br>0.049      | 0.690,<br>0.0166,<br>0.2373,<br>0.05     |
| MR-RAPS1           | 0.107,<br>-0.0264,<br>0.4036,<br>0.3842   | 0.106,<br>0.0237,<br>0.4037,<br>0.3842    | 0.108,<br>0.0437,<br>0.4037,<br>0.3842       | 0.109,<br>0.0638,<br>0.4037,<br>0.3842      | 0.105,<br>0.0738,<br>0.4037,<br>0.3842  | 0.106,<br>0.0838,<br>0.4037,<br>0.3842   | 0.106,<br>0.1039,<br>0.4037,<br>0.3842    | 0.114,<br>0.1239,<br>0.4037,<br>0.3842      | 0.117,<br>0.1740,<br>0.4037,<br>0.3843   |
| MR-RAPS2           | 0.115,<br>-0.0310,<br>0.4253,<br>0.4102   | 0.104,<br>0.0159,<br>0.4241,<br>0.41      | 0.107,<br>0.0380,<br>0.4250,<br>0.4108       | 0.114,<br>0.0582,<br>0.4379,<br>0.4104      | 0.109,<br>0.0663,<br>0.4368,<br>0.4102  | 0.107,<br>0.0794,<br>0.4374,<br>0.4118   | 0.109,<br>0.0988,<br>0.4382,<br>0.4115    | 0.112,<br>0.1225,<br>0.4263,<br>0.4126      | 0.120,<br>0.1701,<br>0.4255,<br>0.4117   |
| MR-RAPS3           | 0.881,<br>2.0639,<br>93.7912,<br>252.4835 | 0.893,<br>-1.6022,<br>54.9780,<br>106.569 | 0.902,<br>-6.0948,<br>259.1498,<br>2527.0841 | 0.900,<br>7.5128,<br>202.9000,<br>2281.6167 | 0.905,<br>1.6741,<br>71.2527,<br>148.85 | 0.904,<br>3.6396,<br>88.6035,<br>721.006 | 0.889,<br>-2.0102,<br>33.9409,<br>48.2306 | 0.893,<br>7.2212,<br>169.8092,<br>1117.9699 | 0.882,<br>4.9987,<br>77.2008,<br>953.607 |
| MR-RAPS4           | 0.979,<br>-0.7163,<br>7.9742,<br>0.8387   | 0.963,<br>-0.7850,<br>9.7173,<br>1.2497   | 0.963,<br>-0.5914,<br>8.6282,<br>1.3841      | 0.952,<br>-0.3806,<br>7.5705,<br>2.7722     | 0.942,<br>-0.3676,<br>9.3461,<br>2.5249 | 0.948,<br>-0.2913,<br>9.6837,<br>1.4926  | 0.942,<br>-0.4679,<br>8.5193,<br>2.3324   | 0.940,<br>-0.2870,<br>8.0767,<br>1.4293     | 0.959,<br>-0.2074,<br>9.8532,<br>1.1574  |

Table S45: Main simulations: in each cell, from top to bottom are empirical type-I error/power, mean( $\hat{\theta}$ ), SD( $\hat{\theta}$ ), mean(SE( $\hat{\theta}$ )) when  $m = 10$ , the InSIDE violated,  $q = 0.6$ , and  $n = 100000$ .

| Methods \ $\theta$ | -0.1                              | -0.05                             | -0.03                             | -0.01                             | 0                                   | 0.01                              | 0.03                              | 0.05                              | 0.1                              |
|--------------------|-----------------------------------|-----------------------------------|-----------------------------------|-----------------------------------|-------------------------------------|-----------------------------------|-----------------------------------|-----------------------------------|----------------------------------|
| cML-MA-AIC         | 0.723, -0.0850, 3.100e-02, 0.0335 | 0.196, -0.0374, 2.800e-02, 0.0338 | 0.061, -0.0209, 2.580e-02, 0.0337 | 0.012, -0.0062, 2.380e-02, 0.0338 | 0.005, 0.0007, 2.360e-02, 0.0339    | 0.014, 0.0073, 2.430e-02, 0.0341  | 0.054, 0.0216, 2.620e-02, 0.0348  | 0.184, 0.0380, 2.930e-02, 0.0355  | 0.669, 0.0848, 3.360e-02, 0.0368 |
| cML-MA-AIC-Profile | 0.722, -0.0851, 3.100e-02, 0.0336 | 0.194, -0.0374, 2.800e-02, 0.0339 | 0.060, -0.0209, 2.580e-02, 0.0338 | 0.012, -0.0062, 2.380e-02, 0.0339 | 0.005, 0.0007, 2.360e-02, 0.034     | 0.013, 0.0072, 2.420e-02, 0.0342  | 0.053, 0.0216, 2.620e-02, 0.0349  | 0.184, 0.0380, 2.930e-02, 0.0356  | 0.668, 0.0850, 3.370e-02, 0.037  |
| cML-AIC            | 0.816, -0.0888, 3.560e-02, 0.0286 | 0.360, -0.0410, 3.280e-02, 0.0291 | 0.163, -0.0235, 3.150e-02, 0.0293 | 0.049, -0.0071, 3.010e-02, 0.0295 | 0.036, 0.0010, 2.990e-02, 0.0297    | 0.049, 0.0083, 3.050e-02, 0.0299  | 0.163, 0.0242, 3.210e-02, 0.0302  | 0.344, 0.0419, 3.380e-02, 0.0305  | 0.788, 0.0892, 3.770e-02, 0.0314 |
| cML-AIC-Profile    | 0.817, -0.0889, 3.550e-02, 0.0287 | 0.359, -0.0410, 3.280e-02, 0.0292 | 0.161, -0.0235, 3.150e-02, 0.0294 | 0.049, -0.0071, 3.010e-02, 0.0297 | 0.035, 0.0010, 2.990e-02, 0.0298    | 0.046, 0.0083, 3.050e-02, 0.03    | 0.161, 0.0242, 3.210e-02, 0.0303  | 0.340, 0.0419, 3.380e-02, 0.0306  | 0.787, 0.0894, 3.790e-02, 0.0315 |
| cML-MA-BIC         | 0.955, -0.0988, 2.600e-02, 0.0267 | 0.451, -0.0488, 2.650e-02, 0.0272 | 0.188, -0.0288, 2.660e-02, 0.0274 | 0.050, -0.0089, 2.680e-02, 0.0276 | 0.036, 0.0010, 2.700e-02, 0.0278    | 0.053, 0.0109, 2.710e-02, 0.0279  | 0.202, 0.0308, 2.750e-02, 0.0281  | 0.446, 0.0507, 2.790e-02, 0.0284  | 0.935, 0.1007, 2.880e-02, 0.0293 |
| cML-MA-BIC-Profile | 0.954, -0.0988, 2.600e-02, 0.0268 | 0.448, -0.0488, 2.650e-02, 0.0272 | 0.188, -0.0288, 2.660e-02, 0.0275 | 0.050, -0.0089, 2.680e-02, 0.0277 | 0.036, 0.0010, 2.700e-02, 0.0278    | 0.053, 0.0109, 2.710e-02, 0.0279  | 0.201, 0.0308, 2.750e-02, 0.0282  | 0.445, 0.0507, 2.790e-02, 0.0285  | 0.935, 0.1007, 2.880e-02, 0.0293 |
| cML-BIC            | 0.960, -0.0991, 2.600e-02, 0.0264 | 0.466, -0.0491, 2.650e-02, 0.0269 | 0.198, -0.0291, 2.670e-02, 0.0271 | 0.055, -0.0091, 2.700e-02, 0.0273 | 0.039, 0.0009, 2.710e-02, 0.0275    | 0.056, 0.0109, 2.730e-02, 0.0276  | 0.208, 0.0310, 2.760e-02, 0.0279  | 0.457, 0.0510, 2.790e-02, 0.0282  | 0.938, 0.1010, 2.880e-02, 0.029  |
| cML-BIC-Profile    | 0.960, -0.0991, 2.600e-02, 0.0265 | 0.464, -0.0491, 2.650e-02, 0.0269 | 0.197, -0.0291, 2.670e-02, 0.0272 | 0.054, -0.0091, 2.700e-02, 0.0274 | 0.039, 0.0009, 2.710e-02, 0.0275    | 0.054, 0.0109, 2.730e-02, 0.0277  | 0.207, 0.0310, 2.760e-02, 0.0279  | 0.455, 0.0510, 2.790e-02, 0.0282  | 0.937, 0.1010, 2.880e-02, 0.0291 |
| MR-Mix             | 0.929, -0.1019, 2.770e-02, 0.031  | 0.395, -0.0491, 2.770e-02, 0.0301 | 0.161, -0.0287, 2.780e-02, 0.0301 | 0.047, -0.0086, 2.790e-02, 0.0303 | 0.027, 0.0013, 2.790e-02, 0.0304    | 0.046, 0.0111, 2.800e-02, 0.0306  | 0.171, 0.0302, 2.810e-02, 0.0304  | 0.388, 0.0494, 2.810e-02, 0.0303  | 0.886, 0.0951, 2.830e-02, 0.0303 |
| MR-ContMix         | 0.955, -0.0989, 2.750e-02, NA     | 0.507, -0.0489, 2.770e-02, NA     | 0.244, -0.0290, 2.790e-02, NA     | 0.091, -0.0090, 2.820e-02, NA     | 0.071, 0.0010, 2.830e-02, NA        | 0.081, 0.0110, 2.850e-02, NA      | 0.252, 0.0310, 2.870e-02, NA      | 0.494, 0.0510, 2.910e-02, NA      | 0.937, 0.1010, 3.000e-02, NA     |
| MR-Lasso           | 0.888, -0.0570, 3.792e-01, 0.0598 | 0.461, -0.0077, 3.800e-01, 0.06   | 0.264, -0.0119, 3.795e-01, 0.0604 | 0.169, 0.0320, 3.792e-01, 0.0604  | 0.155, 0.0421, 3.791e-01, 0.0606    | 0.164, 0.0521, 3.791e-01, 0.0607  | 0.258, 0.0717, 3.789e-01, 0.0609  | 0.435, 0.0917, 3.785e-01, 0.0611  | 0.826, 0.1416, 3.787e-01, 0.0617 |
| MR-PRESSO          | 0.207, -0.0344, 4.203e-01, 0.2848 | 0.121, 0.0164, 4.200e-01, 0.2828  | 0.097, 0.0366, 4.199e-01, 0.282   | 0.081, 0.0569, 4.197e-01, 0.2805  | 0.085, 0.0671, 4.195e-01, 0.2798    | 0.088, 0.0769, 4.195e-01, 0.2792  | 0.105, 0.0968, 4.195e-01, 0.278   | 0.135, 0.1170, 4.195e-01, 0.2769  | 0.226, 0.1662, 4.195e-01, 0.2743 |
| MR-IVW             | 0.105, -0.0360, 4.230e-01, 0.3961 | 0.099, 0.0145, 4.229e-01, 0.3961  | 0.099, 0.0346, 4.229e-01, 0.3961  | 0.102, 0.0548, 4.229e-01, 0.396   | 0.105, 0.0649, 4.229e-01, 0.396     | 0.106, 0.0750, 4.229e-01, 0.396   | 0.108, 0.0951, 4.228e-01, 0.396   | 0.111, 0.1152, 4.228e-01, 0.396   | 0.116, 0.1655, 4.228e-01, 0.3959 |
| MR-IVW-Oracle      | 0.915, -0.0989, 2.630e-02, 0.0297 | 0.381, -0.0489, 2.630e-02, 0.0302 | 0.152, -0.0290, 2.660e-02, 0.0305 | 0.043, -0.0090, 2.680e-02, 0.0307 | 0.028, 0.0010, 2.700e-02, 0.0309    | 0.040, 0.0110, 2.710e-02, 0.031   | 0.162, 0.0310, 2.740e-02, 0.0313  | 0.385, 0.0509, 2.770e-02, 0.0316  | 0.886, 0.1009, 2.860e-02, 0.0325 |
| MR-Egger           | 0.164, 0.5210, 1.514e+00, 1.282   | 0.172, 0.5700, 1.514e+00, 1.282   | 0.172, 0.5896, 1.514e+00, 1.282   | 0.174, 0.6092, 1.514e+00, 1.282   | 0.175, 0.6190, 1.514e+00, 1.282     | 0.174, 0.6287, 1.514e+00, 1.282   | 0.175, 0.6483, 1.514e+00, 1.282   | 0.183, 0.6679, 1.514e+00, 1.282   | 0.189, 0.7167, 1.513e+00, 1.282  |
| MR-Weighted-Median | 0.842, -0.1081, 1.070e-01, 0.0363 | 0.426, -0.0644, 1.095e-01, 0.037  | 0.260, -0.0473, 1.104e-01, 0.0372 | 0.167, -0.0301, 1.124e-01, 0.0376 | 0.151, -0.0216, 1.134e-01, 0.0377   | 0.153, -0.0131, 1.150e-01, 0.0379 | 0.206, 0.0035, 1.183e-01, 0.0382  | 0.328, 0.0200, 1.221e-01, 0.0386  | 0.714, 0.0613, 1.327e-01, 0.0397 |
| MR-Weighted-Mode   | 0.807, -0.1414, 2.083e-01, 0.0364 | 0.760, -0.1037, 2.086e-01, 0.0368 | 0.750, -0.0886, 2.099e-01, 0.0371 | 0.745, -0.0738, 2.106e-01, 0.0375 | 0.739, -0.0660, 2.117e-01, 0.0376   | 0.729, -0.0590, 2.130e-01, 0.038  | 0.731, -0.0460, 2.107e-01, 0.0383 | 0.733, -0.0311, 2.122e-01, 0.039  | 0.724, 0.0032, 2.169e-01, 0.0401 |
| MR-RAPS1           | 0.105, -0.0345, 4.127e-01, 0.3761 | 0.115, 0.0156, 4.128e-01, 0.3761  | 0.116, 0.0356, 4.128e-01, 0.3761  | 0.116, 0.0556, 4.128e-01, 0.376   | 0.120, 0.0656, 4.128e-01, 0.376     | 0.119, 0.0756, 4.128e-01, 0.376   | 0.118, 0.0957, 4.129e-01, 0.376   | 0.119, 0.1157, 4.129e-01, 0.376   | 0.131, 0.1657, 4.129e-01, 0.3761 |
| MR-RAPS2           | 0.175, -0.0739, 4.584e-01, 0.3739 | 0.165, -0.0255, 4.459e-01, 0.3791 | 0.166, -0.0044, 4.529e-01, 0.3781 | 0.162, 0.0230, 4.746e-01, 0.3808  | 0.155, 0.0331, 4.536e-01, 0.3814    | 0.151, 0.0370, 4.456e-01, 0.3816  | 0.154, 0.0575, 4.658e-01, 0.3823  | 0.138, 0.0872, 4.503e-01, 0.3849  | 0.143, 0.1348, 4.528e-01, 0.3878 |
| MR-RAPS3           | 0.925, -1.4125, 5.300e+01, 120.8  | 0.930, -1.5231, 7.782e+01, 137.5  | 0.931, -1.94827, 7.148e+02, 11950 | 0.937, 1.1305, 1.432e+02, 535.1   | 0.934, 344.3808, 1.077e+04, 3045000 | 0.931, 0.2234, 2.287e+01, 14.1    | 0.931, -0.7363, 4.346e+01, 577    | 0.932, 4.207, 2.871e+01, 29.4     | 0.931, 1.2562, 2.377e+01, 15.51  |
| MR-RAPS4           | 0.977, -0.5602, 7.266e+00, 0.5505 | 0.969, -0.1700, 6.251e+00, 0.5518 | 0.967, -0.2526, 5.066e+00, 0.4514 | 0.973, 0.5137, 2.408e+01, 0.8991  | 0.973, -0.1766, 4.869e+00, 0.9432   | 0.967, -0.1216, 4.848e+00, 0.9423 | 0.980, -0.0620, 4.982e+00, 0.3102 | 0.977, -0.0546, 4.927e+00, 0.4632 | 0.976, -0.0612, 7.837e+00, 0.755 |

Table S46: Main simulations: in each cell, from top to bottom are empirical type-I error/power, mean( $\hat{\theta}$ ), SD( $\hat{\theta}$ ), mean(SE( $\hat{\theta}$ )) when  $m = 10$ , the InSIDE violated,  $q = 0.6$ , and  $n = 200000$ .

| Methods \ $\theta$ | -0.1                                        | -0.05                                        | -0.03                                        | -0.01                                       | 0                                        | 0.01                                      | 0.03                                          | 0.05                                     | 0.1                                       |
|--------------------|---------------------------------------------|----------------------------------------------|----------------------------------------------|---------------------------------------------|------------------------------------------|-------------------------------------------|-----------------------------------------------|------------------------------------------|-------------------------------------------|
| cML-MA-AIC         | 0.927,<br>-0.0895,<br>0.0228,<br>0.0239     | 0.417,<br>-0.0400,<br>0.0221,<br>0.0242      | 0.132,<br>-0.0220,<br>0.0201,<br>0.0242      | 0.027,<br>-0.0069,<br>0.0180,<br>0.0239     | 0.016,<br>-0.0002,<br>0.0176,<br>0.0239  | 0.024,<br>0.0066,<br>0.0178,<br>0.024     | 0.121,<br>0.0220,<br>0.0201,<br>0.0246        | 0.369,<br>0.0400,<br>0.0224,<br>0.0251   | 0.903,<br>0.0890,<br>0.0241,<br>0.0259    |
| cML-MA-AIC-Profile | 0.926,<br>-0.0896,<br>0.0228,<br>0.0239     | 0.412,<br>-0.0399,<br>0.0221,<br>0.0243      | 0.132,<br>-0.0220,<br>0.0203,<br>0.0242      | 0.026,<br>-0.0069,<br>0.0180,<br>0.024      | 0.016,<br>-0.0003,<br>0.0176,<br>0.0239  | 0.023,<br>0.0066,<br>0.0178,<br>0.0241    | 0.120,<br>0.0220,<br>0.0201,<br>0.0247        | 0.367,<br>0.0400,<br>0.0224,<br>0.0252   | 0.903,<br>0.0890,<br>0.0241,<br>0.026     |
| cML-AIC            | 0.941,<br>-0.0922,<br>0.0253,<br>0.0203     | 0.609,<br>-0.0426,<br>0.0241,<br>0.0207      | 0.264,<br>-0.0240,<br>0.0241,<br>0.0208      | 0.068,<br>-0.0080,<br>0.0222,<br>0.0209     | 0.061,<br>-0.0004,<br>0.0218,<br>0.021   | 0.083,<br>0.0075,<br>0.0219,<br>0.0211    | 0.240,<br>0.0241,<br>0.0237,<br>0.0213        | 0.558,<br>0.0428,<br>0.0254,<br>0.0215   | 0.925,<br>0.0921,<br>0.0268,<br>0.0221    |
| cML-AIC-Profile    | 0.941,<br>-0.0922,<br>0.0257,<br>0.0203     | 0.608,<br>-0.0426,<br>0.0253,<br>0.0207      | 0.265,<br>-0.0241,<br>0.0242,<br>0.0208      | 0.068,<br>-0.0080,<br>0.0222,<br>0.021      | 0.060,<br>-0.0004,<br>0.0218,<br>0.021   | 0.083,<br>0.0075,<br>0.0219,<br>0.0211    | 0.239,<br>0.0241,<br>0.0237,<br>0.0213        | 0.558,<br>0.0428,<br>0.0254,<br>0.0216   | 0.925,<br>0.0921,<br>0.0268,<br>0.0222    |
| cML-MA-BIC         | 0.998,<br>-0.0999,<br>0.0187,<br>0.0189     | 0.748,<br>-0.0499,<br>0.0190,<br>0.0192      | 0.334,<br>-0.0299,<br>0.0191,<br>0.0194      | 0.076,<br>-0.0100,<br>0.0192,<br>0.0196     | 0.048,<br>-0.0001,<br>0.0193,<br>0.0197  | 0.079,<br>0.0099,<br>0.0193,<br>0.0197    | 0.325,<br>0.0298,<br>0.0196,<br>0.0199        | 0.709,<br>0.0498,<br>0.0198,<br>0.0202   | 0.997,<br>0.0998,<br>0.0203,<br>0.0207    |
| cML-MA-BIC-Profile | 0.997,<br>-0.0999,<br>0.0187,<br>0.0189     | 0.748,<br>-0.0498,<br>0.0191,<br>0.0193      | 0.334,<br>-0.0298,<br>0.0195,<br>0.0196      | 0.076,<br>-0.0098,<br>0.0201,<br>0.0199     | 0.048,<br>0.0002,<br>0.0207,<br>0.0201   | 0.079,<br>0.0102,<br>0.0215,<br>0.0202    | 0.324,<br>0.0302,<br>0.0239,<br>0.0206        | 0.709,<br>0.0504,<br>0.0272,<br>0.0209   | 0.996,<br>0.1008,<br>0.0379,<br>0.0214    |
| cML-BIC            | 0.998,<br>-1.001,<br>0.0187,<br>0.0187      | 0.756,<br>-0.0501,<br>0.0189,<br>0.019       | 0.347,<br>-0.0301,<br>0.0191,<br>0.0192      | 0.079,<br>-0.0100,<br>0.0193,<br>0.0194     | 0.051,<br>0.0000,<br>0.0194,<br>0.0195   | 0.086,<br>0.0100,<br>0.0195,<br>0.0196    | 0.335,<br>0.0300,<br>0.0196,<br>0.0198        | 0.714,<br>0.0500,<br>0.0198,<br>0.02     | 0.998,<br>0.1000,<br>0.0204,<br>0.0205    |
| cML-BIC-Profile    | 0.998,<br>-1.001,<br>0.0187,<br>0.0187      | 0.755,<br>-0.0501,<br>0.0189,<br>0.0191      | 0.348,<br>-0.0301,<br>0.0191,<br>0.0192      | 0.079,<br>-0.0100,<br>0.0193,<br>0.0194     | 0.050,<br>0.0000,<br>0.0194,<br>0.0195   | 0.086,<br>0.0100,<br>0.0195,<br>0.0196    | 0.334,<br>0.0300,<br>0.0196,<br>0.0198        | 0.714,<br>0.0500,<br>0.0198,<br>0.02     | 0.998,<br>0.1016,<br>0.0527,<br>0.0206    |
| MR-Mix             | 0.997,<br>-0.1032,<br>0.0200,<br>0.0218     | 0.667,<br>-0.0503,<br>0.0199,<br>0.0217      | 0.271,<br>-0.0300,<br>0.0199,<br>0.0216      | 0.064,<br>-0.0099,<br>0.0201,<br>0.0217     | 0.049,<br>0.0000,<br>0.0200,<br>0.0217   | 0.066,<br>0.0099,<br>0.0201,<br>0.0217    | 0.263,<br>0.0293,<br>0.0199,<br>0.0218        | 0.646,<br>0.0483,<br>0.0200,<br>0.0219   | 0.989,<br>0.0939,<br>0.0205,<br>0.0223    |
| MR-ContMix         | 0.996,<br>-1.001,<br>0.0192,<br>NA          | 0.789,<br>-0.0502,<br>0.0195,<br>NA          | 0.405,<br>-0.0302,<br>0.0196,<br>NA          | 0.118,<br>-0.0102,<br>0.0198,<br>NA         | 0.082,<br>-0.0002,<br>0.0198,<br>NA      | 0.125,<br>0.0098,<br>0.0199,<br>NA        | 0.397,<br>0.0298,<br>0.0200,<br>NA            | 0.744,<br>0.0498,<br>0.0202,<br>NA       | 0.997,<br>0.0998,<br>0.0208,<br>NA        |
| MR-Lasso           | 0.967,<br>-0.0560,<br>0.3638,<br>0.0485     | 0.695,<br>-0.0055,<br>0.3633,<br>0.0487      | 0.355,<br>0.0154,<br>0.3634,<br>0.0493       | 0.179,<br>0.0358,<br>0.3634,<br>0.0493      | 0.153,<br>0.0457,<br>0.3630,<br>0.0494   | 0.171,<br>0.0560,<br>0.3633,<br>0.0494    | 0.328,<br>0.0756,<br>0.3635,<br>0.0498        | 0.639,<br>0.0955,<br>0.3635,<br>0.0501   | 0.927,<br>0.1466,<br>0.3633,<br>0.0506    |
| MR-PRESSO          | 0.204,<br>-0.0300,<br>0.4156,<br>0.3195     | 0.122,<br>0.0206,<br>0.4155,<br>0.3188       | 0.095,<br>0.0407,<br>0.4155,<br>0.3177       | 0.074,<br>0.0604,<br>0.4155,<br>0.3164      | 0.070,<br>0.0704,<br>0.4155,<br>0.3164   | 0.076,<br>0.0806,<br>0.4154,<br>0.3161    | 0.108,<br>0.1008,<br>0.4154,<br>0.3158        | 0.152,<br>0.1208,<br>0.4154,<br>0.3151   | 0.236,<br>0.1706,<br>0.4152,<br>0.3123    |
| MR-IVW             | 0.091,<br>-0.0309,<br>0.4167,<br>0.4016     | 0.093,<br>0.0196,<br>0.4167,<br>0.4016       | 0.091,<br>0.0397,<br>0.4166,<br>0.4016       | 0.091,<br>0.0599,<br>0.4166,<br>0.4016      | 0.092,<br>0.0700,<br>0.4166,<br>0.4015   | 0.094,<br>0.0801,<br>0.4166,<br>0.4015    | 0.095,<br>0.1002,<br>0.4166,<br>0.4015        | 0.100,<br>0.1204,<br>0.4166,<br>0.4015   | 0.116,<br>0.1707,<br>0.4165,<br>0.4015    |
| MR-IVW-Oracle      | 0.992,<br>-1.000,<br>0.0187,<br>0.0211      | 0.668,<br>-0.0500,<br>0.0189,<br>0.0215      | 0.274,<br>-0.0300,<br>0.0191,<br>0.0217      | 0.060,<br>-0.0100,<br>0.0192,<br>0.0219     | 0.042,<br>-0.0001,<br>0.0193,<br>0.022   | 0.069,<br>0.0099,<br>0.0194,<br>0.0221    | 0.258,<br>0.0299,<br>0.0196,<br>0.0224        | 0.630,<br>0.0499,<br>0.0197,<br>0.0226   | 0.986,<br>0.0999,<br>0.0203,<br>0.0232    |
| MR-Egger           | 0.209,<br>0.7085,<br>1.6364,<br>1.2704      | 0.215,<br>0.7579,<br>1.6364,<br>1.2704       | 0.217,<br>0.7777,<br>1.6365,<br>1.2704       | 0.218,<br>0.7974,<br>1.6365,<br>1.2704      | 0.220,<br>0.8073,<br>1.6365,<br>1.2704   | 0.220,<br>0.8171,<br>1.6365,<br>1.2704    | 0.219,<br>0.8369,<br>1.6365,<br>1.2704        | 0.221,<br>0.8566,<br>1.6366,<br>1.2704   | 0.229,<br>0.9059,<br>1.6366,<br>1.2704    |
| MR-Weighted-Median | 0.948,<br>-0.1024,<br>0.1330,<br>0.0275     | 0.633,<br>-0.0589,<br>0.1344,<br>0.0277      | 0.375,<br>-0.0415,<br>0.1356,<br>0.0279      | 0.189,<br>-0.0241,<br>0.1370,<br>0.0281     | 0.154,<br>-0.0155,<br>0.1379,<br>0.0282  | 0.178,<br>-0.0067,<br>0.1387,<br>0.0284   | 0.292,<br>0.0106,<br>0.1409,<br>0.0287        | 0.515,<br>0.0275,<br>0.1426,<br>0.0289   | 0.848,<br>0.0697,<br>0.1512,<br>0.0297    |
| MR-Weighted-Mode   | 0.872,<br>-0.1220,<br>0.2271,<br>0.0257     | 0.831,<br>-0.0855,<br>0.2311,<br>0.0257      | 0.823,<br>-0.0708,<br>0.2335,<br>0.0258      | 0.817,<br>-0.0560,<br>0.2350,<br>0.0261     | 0.822,<br>-0.0485,<br>0.2361,<br>0.0263  | 0.821,<br>-0.0416,<br>0.2379,<br>0.0264   | 0.815,<br>-0.0267,<br>0.2390,<br>0.0264       | 0.816,<br>-0.0119,<br>0.2415,<br>0.0266  | 0.804,<br>0.0238,<br>0.2505,<br>0.027     |
| MR-RAPS1           | 0.105,<br>-0.2502,<br>8.2147,<br>1.3504     | 0.107,<br>-1.5332,<br>44.5248,<br>22.2417    | 0.109,<br>0.1187,<br>3.3341,<br>0.4994       | 0.106,<br>0.0648,<br>2.2694,<br>0.4349      | 0.104,<br>0.0459,<br>2.4359,<br>0.4454   | 0.102,<br>0.0153,<br>3.1656,<br>0.4957    | 0.108,<br>0.1075,<br>1.2322,<br>0.3949        | 0.111,<br>0.1199,<br>1.3024,<br>0.4015   | 0.125,<br>0.1771,<br>0.7752,<br>0.3858    |
| MR-RAPS2           | 0.281,<br>-0.0856,<br>0.4947,<br>0.2646     | 0.240,<br>-0.0360,<br>0.4766,<br>0.2679      | 0.233,<br>-0.0273,<br>0.4684,<br>0.2643      | 0.198,<br>-0.0010,<br>0.4759,<br>0.2757     | 0.188,<br>0.0019,<br>0.4607,<br>0.2742   | 0.187,<br>0.0129,<br>0.4854,<br>0.2731    | 0.180,<br>0.0209,<br>0.7618,<br>0.2786        | 0.171,<br>0.0543,<br>0.4452,<br>0.2824   | 0.174,<br>0.1114,<br>0.4689,<br>0.2928    |
| MR-RAPS3           | 0.948,<br>-3.9798,<br>133.1913,<br>265.2621 | 0.944,<br>27.6247,<br>703.6228,<br>8354.1716 | 0.946,<br>-2.8912,<br>149.4389,<br>3683.3129 | 0.944,<br>-5.1822,<br>141.8313,<br>587.2076 | 0.946,<br>1.0330,<br>56.3390,<br>57.5573 | 0.948,<br>-0.5791,<br>57.5046,<br>67.6878 | 0.949,<br>-15.4647,<br>752.9266,<br>8713.9481 | 0.950,<br>0.1444,<br>36.8795,<br>25.6024 | 0.947,<br>-1.0000,<br>38.1072,<br>57.7633 |
| MR-RAPS4           | 0.989,<br>0.0094,<br>3.2157,<br>0.2749      | 0.976,<br>0.0977,<br>3.3890,<br>0.3038       | 0.969,<br>0.1306,<br>3.4094,<br>0.4216       | 0.973,<br>0.1374,<br>4.1508,<br>0.3486      | 0.980,<br>0.1847,<br>4.3370,<br>0.2556   | 0.981,<br>0.1272,<br>4.2599,<br>0.3706    | 0.975,<br>0.3318,<br>8.0901,<br>0.3917        | 0.975,<br>0.1738,<br>4.1473,<br>0.5444   | 1.000,<br>0.2699,<br>0.2967,<br>0.0149    |

Table S47: Main simulations: in each cell, from top to bottom are empirical type-I error/power, mean( $\hat{\theta}$ ), SD( $\hat{\theta}$ ), mean(SE( $\hat{\theta}$ )) when  $m = 20$ , the ideal case of  $q = 0$ , and  $n = 50000$ .

| Methods \ $\theta$ | -0.1                                    | -0.05                                   | -0.03                                   | -0.01                                   | 0                                       | 0.01                                   | 0.03                                   | 0.05                                   | 0.1                                    |
|--------------------|-----------------------------------------|-----------------------------------------|-----------------------------------------|-----------------------------------------|-----------------------------------------|----------------------------------------|----------------------------------------|----------------------------------------|----------------------------------------|
| cML-MA-AIC         | 0.969,<br>-0.0915,<br>0.0221,<br>0.0201 | 0.559,<br>-0.0424,<br>0.0217,<br>0.0203 | 0.239,<br>-0.0240,<br>0.0206,<br>0.0202 | 0.054,<br>-0.0070,<br>0.0192,<br>0.0201 | 0.046,<br>0.0010,<br>0.0190,<br>0.0202  | 0.071,<br>0.0089,<br>0.0194,<br>0.0204 | 0.244,<br>0.0256,<br>0.0210,<br>0.0208 | 0.518,<br>0.0436,<br>0.0228,<br>0.0213 | 0.957,<br>0.0921,<br>0.0248,<br>0.0223 |
| cML-MA-AIC-Profile | 0.969,<br>-0.0918,<br>0.0223,<br>0.0203 | 0.554,<br>-0.0425,<br>0.0217,<br>0.0204 | 0.238,<br>-0.0240,<br>0.0206,<br>0.0203 | 0.053,<br>-0.0070,<br>0.0192,<br>0.0202 | 0.045,<br>0.0010,<br>0.0190,<br>0.0203  | 0.070,<br>0.0089,<br>0.0194,<br>0.0205 | 0.241,<br>0.0256,<br>0.0210,<br>0.0209 | 0.517,<br>0.0436,<br>0.0228,<br>0.0215 | 0.957,<br>0.0924,<br>0.0249,<br>0.0224 |
| cML-AIC            | 0.990,<br>-0.0954,<br>0.0237,<br>0.0174 | 0.699,<br>-0.0458,<br>0.0240,<br>0.0177 | 0.380,<br>-0.0265,<br>0.0235,<br>0.0178 | 0.146,<br>-0.0079,<br>0.0230,<br>0.018  | 0.117,<br>0.0011,<br>0.0231,<br>0.0181  | 0.152,<br>0.0101,<br>0.0233,<br>0.0182 | 0.389,<br>0.0284,<br>0.0238,<br>0.0184 | 0.672,<br>0.0474,<br>0.0248,<br>0.0186 | 0.987,<br>0.0968,<br>0.0258,<br>0.0191 |
| cML-AIC-Profile    | 0.989,<br>-0.0958,<br>0.0239,<br>0.0175 | 0.696,<br>-0.0459,<br>0.0240,<br>0.0178 | 0.376,<br>-0.0265,<br>0.0236,<br>0.018  | 0.141,<br>-0.0079,<br>0.0230,<br>0.0181 | 0.114,<br>0.0011,<br>0.0231,<br>0.0182  | 0.149,<br>0.0101,<br>0.0233,<br>0.0183 | 0.386,<br>0.0284,<br>0.0238,<br>0.0185 | 0.666,<br>0.0475,<br>0.0248,<br>0.0187 | 0.987,<br>0.0969,<br>0.0259,<br>0.0192 |
| cML-MA-BIC         | 1.000,<br>-0.0995,<br>0.0162,<br>0.0161 | 0.855,<br>-0.0496,<br>0.0165,<br>0.0164 | 0.430,<br>-0.0296,<br>0.0167,<br>0.0166 | 0.090,<br>-0.0097,<br>0.0168,<br>0.0167 | 0.052,<br>0.0003,<br>0.0169,<br>0.0168  | 0.097,<br>0.0102,<br>0.0170,<br>0.0169 | 0.417,<br>0.0301,<br>0.0172,<br>0.0171 | 0.831,<br>0.0501,<br>0.0174,<br>0.0173 | 1.000,<br>0.1000,<br>0.0180,<br>0.0178 |
| cML-MA-BIC-Profile | 1.000,<br>-0.0996,<br>0.0162,<br>0.0162 | 0.854,<br>-0.0496,<br>0.0165,<br>0.0165 | 0.426,<br>-0.0296,<br>0.0166,<br>0.0166 | 0.088,<br>-0.0097,<br>0.0168,<br>0.0168 | 0.049,<br>0.0003,<br>0.0169,<br>0.0169  | 0.094,<br>0.0102,<br>0.0170,<br>0.017  | 0.414,<br>0.0301,<br>0.0172,<br>0.0171 | 0.831,<br>0.0501,<br>0.0174,<br>0.0173 | 1.000,<br>0.1001,<br>0.0180,<br>0.0179 |
| cML-BIC            | 1.000,<br>-0.0996,<br>0.0162,<br>0.0159 | 0.862,<br>-0.0497,<br>0.0165,<br>0.0162 | 0.443,<br>-0.0297,<br>0.0166,<br>0.0164 | 0.097,<br>-0.0097,<br>0.0168,<br>0.0165 | 0.057,<br>0.0002,<br>0.0169,<br>0.0166  | 0.101,<br>0.0102,<br>0.0170,<br>0.0167 | 0.433,<br>0.0302,<br>0.0172,<br>0.0169 | 0.840,<br>0.0502,<br>0.0174,<br>0.0171 | 1.000,<br>0.1001,<br>0.0180,<br>0.0176 |
| cML-BIC-Profile    | 1.000,<br>-0.0996,<br>0.0162,<br>0.016  | 0.861,<br>-0.0497,<br>0.0165,<br>0.0163 | 0.442,<br>-0.0297,<br>0.0166,<br>0.0164 | 0.095,<br>-0.0097,<br>0.0168,<br>0.0166 | 0.054,<br>0.0002,<br>0.0169,<br>0.0167  | 0.099,<br>0.0102,<br>0.0170,<br>0.0167 | 0.432,<br>0.0302,<br>0.0172,<br>0.0169 | 0.838,<br>0.0502,<br>0.0174,<br>0.0171 | 1.000,<br>0.1001,<br>0.0180,<br>0.0176 |
| MR-Mix             | 0.751,<br>-0.0990,<br>0.0417,<br>0.1318 | 0.540,<br>-0.0484,<br>0.0315,<br>0.2585 | 0.263,<br>-0.0289,<br>0.0294,<br>0.1924 | 0.075,<br>-0.0095,<br>0.0284,<br>0.1854 | 0.065,<br>-0.0001,<br>0.0284,<br>0.0845 | 0.072,<br>0.0094,<br>0.0283,<br>0.1963 | 0.242,<br>0.0281,<br>0.0295,<br>0.0754 | 0.501,<br>0.0461,<br>0.0312,<br>0.2309 | 0.728,<br>0.0901,<br>0.0387,<br>0.0609 |
| MR-ContMix         | 0.996,<br>-0.1212,<br>0.0233,<br>NA     | 0.714,<br>-0.0681,<br>0.0296,<br>NA     | 0.360,<br>-0.0426,<br>0.0331,<br>NA     | 0.104,<br>-0.0138,<br>0.0363,<br>NA     | 0.092,<br>0.0009,<br>0.0367,<br>NA      | 0.114,<br>0.0155,<br>0.0360,<br>NA     | 0.376,<br>0.0445,<br>0.0331,<br>NA     | 0.673,<br>0.0697,<br>0.0304,<br>NA     | 0.996,<br>0.1237,<br>0.0257,<br>NA     |
| MR-Lasso           | 1.000,<br>-0.0991,<br>0.0171,<br>0.0165 | 0.824,<br>-0.0495,<br>0.0178,<br>0.0169 | 0.412,<br>-0.0295,<br>0.0179,<br>0.0171 | 0.098,<br>-0.0098,<br>0.0180,<br>0.0172 | 0.062,<br>0.0002,<br>0.0180,<br>0.0173  | 0.103,<br>0.0103,<br>0.0182,<br>0.0174 | 0.401,<br>0.0297,<br>0.0183,<br>0.0175 | 0.790,<br>0.0500,<br>0.0185,<br>0.0177 | 1.000,<br>0.0996,<br>0.0194,<br>0.0183 |
| MR-PRESSO          | 1.000,<br>-0.0991,<br>0.0161,<br>0.0156 | 0.823,<br>-0.0494,<br>0.0164,<br>0.0159 | 0.411,<br>-0.0296,<br>0.0166,<br>0.016  | 0.095,<br>-0.0097,<br>0.0168,<br>0.0162 | 0.062,<br>0.0002,<br>0.0168,<br>0.0163  | 0.089,<br>0.0101,<br>0.0169,<br>0.0163 | 0.395,<br>0.0300,<br>0.0171,<br>0.0165 | 0.794,<br>0.0499,<br>0.0173,<br>0.0167 | 1.000,<br>0.0995,<br>0.0179,<br>0.0172 |
| MR-IVW             | 1.000,<br>-0.0991,<br>0.0161,<br>0.0167 | 0.831,<br>-0.0495,<br>0.0164,<br>0.0171 | 0.402,<br>-0.0296,<br>0.0166,<br>0.0172 | 0.082,<br>-0.0098,<br>0.0167,<br>0.0174 | 0.046,<br>0.0002,<br>0.0168,<br>0.0175  | 0.085,<br>0.0101,<br>0.0169,<br>0.0176 | 0.387,<br>0.0300,<br>0.0171,<br>0.0178 | 0.804,<br>0.0498,<br>0.0173,<br>0.018  | 1.000,<br>0.0995,<br>0.0179,<br>0.0185 |
| MR-IVW-Oracle      | 1.000,<br>-0.0991,<br>0.0161,<br>0.0167 | 0.831,<br>-0.0495,<br>0.0164,<br>0.0171 | 0.402,<br>-0.0296,<br>0.0166,<br>0.0172 | 0.082,<br>-0.0098,<br>0.0167,<br>0.0174 | 0.046,<br>0.0002,<br>0.0168,<br>0.0175  | 0.085,<br>0.0101,<br>0.0169,<br>0.0176 | 0.387,<br>0.0300,<br>0.0171,<br>0.0178 | 0.804,<br>0.0498,<br>0.0173,<br>0.018  | 1.000,<br>0.0995,<br>0.0179,<br>0.0185 |
| MR-Egger           | 0.183,<br>-0.0863,<br>0.0826,<br>0.086  | 0.061,<br>-0.0433,<br>0.0840,<br>0.0878 | 0.041,<br>-0.0261,<br>0.0847,<br>0.0886 | 0.037,<br>-0.0090,<br>0.0855,<br>0.0895 | 0.039,<br>-0.0004,<br>0.0859,<br>0.0899 | 0.039,<br>0.0082,<br>0.0863,<br>0.0904 | 0.052,<br>0.0254,<br>0.0871,<br>0.0914 | 0.067,<br>0.0426,<br>0.0880,<br>0.0924 | 0.134,<br>0.0855,<br>0.0905,<br>0.095  |
| MR-Weighted-Median | 0.997,<br>-0.0969,<br>0.0192,<br>0.0225 | 0.555,<br>-0.0481,<br>0.0195,<br>0.0229 | 0.210,<br>-0.0286,<br>0.0197,<br>0.0231 | 0.031,<br>-0.0090,<br>0.0199,<br>0.0233 | 0.025,<br>0.0008,<br>0.0199,<br>0.0234  | 0.050,<br>0.0106,<br>0.0201,<br>0.0235 | 0.205,<br>0.0302,<br>0.0203,<br>0.0237 | 0.564,<br>0.0498,<br>0.0205,<br>0.024  | 0.994,<br>0.0985,<br>0.0210,<br>0.0247 |
| MR-Weighted-Mode   | 0.794,<br>-0.0960,<br>0.0293,<br>0.0371 | 0.209,<br>-0.0469,<br>0.0293,<br>0.0377 | 0.051,<br>-0.0272,<br>0.0295,<br>0.0381 | 0.007,<br>-0.0075,<br>0.0298,<br>0.0384 | 0.006,<br>0.0020,<br>0.0301,<br>0.0386  | 0.010,<br>0.0118,<br>0.0302,<br>0.0388 | 0.056,<br>0.0310,<br>0.0304,<br>0.0392 | 0.203,<br>0.0506,<br>0.0306,<br>0.0397 | 0.720,<br>0.0991,<br>0.0315,<br>0.0408 |
| MR-RAPS1           | 1.000,<br>-0.0996,<br>0.0161,<br>0.0167 | 0.838,<br>-0.0497,<br>0.0165,<br>0.017  | 0.415,<br>-0.0298,<br>0.0166,<br>0.0171 | 0.084,<br>-0.0098,<br>0.0168,<br>0.0173 | 0.051,<br>0.0002,<br>0.0169,<br>0.0174  | 0.087,<br>0.0102,<br>0.0170,<br>0.0175 | 0.392,<br>0.0301,<br>0.0172,<br>0.0177 | 0.808,<br>0.0501,<br>0.0174,<br>0.0179 | 1.000,<br>0.1000,<br>0.0180,<br>0.0184 |
| MR-RAPS2           | 1.000,<br>-0.1574,<br>4.1595,<br>0.0565 | 0.828,<br>0.0252,<br>4.4121,<br>0.0556  | 0.412,<br>-0.0232,<br>4.4364,<br>0.0418 | 0.104,<br>0.0619,<br>1.9884,<br>0.0269  | 0.061,<br>0.0310,<br>2.0792,<br>0.0254  | 0.096,<br>0.0627,<br>2.2456,<br>0.0275 | 0.391,<br>0.0225,<br>4.1872,<br>0.0417 | 0.792,<br>0.1562,<br>4.7615,<br>0.0565 | 1.000,<br>0.2590,<br>4.6551,<br>0.0613 |
| MR-RAPS3           | 1.000,<br>-0.0997,<br>0.0162,<br>0.016  | 0.860,<br>-0.0498,<br>0.0165,<br>0.0163 | 0.443,<br>-0.0298,<br>0.0167,<br>0.0164 | 0.099,<br>-0.0098,<br>0.0168,<br>0.0166 | 0.057,<br>0.0002,<br>0.0169,<br>0.0166  | 0.100,<br>0.0102,<br>0.0170,<br>0.0167 | 0.432,<br>0.0301,<br>0.0172,<br>0.0169 | 0.837,<br>0.0501,<br>0.0174,<br>0.0171 | 1.000,<br>0.1000,<br>0.0180,<br>0.0176 |
| MR-RAPS4           | 1.000,<br>-0.0996,<br>0.0165,<br>0.0164 | 0.848,<br>-0.0497,<br>0.0169,<br>0.0167 | 0.418,<br>-0.0297,<br>0.0170,<br>0.0168 | 0.096,<br>-0.0097,<br>0.0172,<br>0.017  | 0.053,<br>0.0003,<br>0.0173,<br>0.0171  | 0.099,<br>0.0103,<br>0.0174,<br>0.0172 | 0.412,<br>0.0302,<br>0.0175,<br>0.0174 | 0.817,<br>0.0502,<br>0.0178,<br>0.0175 | 1.000,<br>0.1002,<br>0.0183,<br>0.0181 |

Table S48: Main simulations: in each cell, from top to bottom are empirical type-I error/power, mean( $\hat{\theta}$ ), SD( $\hat{\theta}$ ), mean( $SE(\hat{\theta})$ ) when  $m = 20$ , the ideal case of  $q = 0$ , and  $n = 100000$ .

| Methods \ $\theta$ | -0.1                           | -0.05                          | -0.03                          | -0.01                          | 0                              | 0.01                          | 0.03                          | 0.05                          | 0.1                           |
|--------------------|--------------------------------|--------------------------------|--------------------------------|--------------------------------|--------------------------------|-------------------------------|-------------------------------|-------------------------------|-------------------------------|
| cML-MA-AIC         | 0.998, -0.0942, 0.0155, 0.0145 | 0.823, -0.0445, 0.0156, 0.0147 | 0.419, -0.0252, 0.0149, 0.0146 | 0.074, -0.0080, 0.0133, 0.0144 | 0.039, -0.0001, 0.0129, 0.0144 | 0.080, 0.0076, 0.0135, 0.0145 | 0.386, 0.0250, 0.0154, 0.0149 | 0.795, 0.0441, 0.0165, 0.0153 | 0.996, 0.0936, 0.0173, 0.0158 |
| cML-MA-AIC-Profile | 0.998, -0.0945, 0.0155, 0.0145 | 0.822, -0.0445, 0.0156, 0.0147 | 0.420, -0.0253, 0.0149, 0.0146 | 0.075, -0.0080, 0.0133, 0.0144 | 0.039, -0.0001, 0.0129, 0.0144 | 0.080, 0.0077, 0.0135, 0.0145 | 0.385, 0.0250, 0.0155, 0.015  | 0.796, 0.0441, 0.0166, 0.0153 | 0.996, 0.0938, 0.0173, 0.0159 |
| cML-AIC            | 1.000, -0.0972, 0.0167, 0.0123 | 0.901, -0.0474, 0.0171, 0.0126 | 0.580, -0.0277, 0.0166, 0.0127 | 0.162, -0.0090, 0.0158, 0.0128 | 0.104, 0.0000, 0.0157, 0.0129  | 0.163, 0.0086, 0.0159, 0.0129 | 0.535, 0.0270, 0.0172, 0.0131 | 0.874, 0.0468, 0.0178, 0.0132 | 1.000, 0.0967, 0.0183, 0.0136 |
| cML-AIC-Profile    | 1.000, -0.0975, 0.0168, 0.0124 | 0.900, -0.0475, 0.0172, 0.0126 | 0.579, -0.0278, 0.0166, 0.0127 | 0.162, -0.0090, 0.0158, 0.0129 | 0.103, 0.0000, 0.0157, 0.0129  | 0.162, 0.0086, 0.0159, 0.0129 | 0.533, 0.0270, 0.0172, 0.0131 | 0.874, 0.0468, 0.0178, 0.0132 | 1.000, 0.0968, 0.0183, 0.0137 |
| cML-MA-BIC         | 1.000, -0.1001, 0.0110, 0.0114 | 0.993, -0.0501, 0.0112, 0.0116 | 0.739, -0.0301, 0.0113, 0.0117 | 0.129, -0.0102, 0.0114, 0.0118 | 0.039, -0.0002, 0.0114, 0.0119 | 0.114, 0.0098, 0.0115, 0.0119 | 0.686, 0.0298, 0.0116, 0.0121 | 0.983, 0.0498, 0.0118, 0.0122 | 1.000, 0.0997, 0.0121, 0.0126 |
| cML-MA-BIC-Profile | 1.000, -0.1001, 0.0110, 0.0114 | 0.993, -0.0501, 0.0112, 0.0116 | 0.738, -0.0301, 0.0113, 0.0117 | 0.129, -0.0102, 0.0114, 0.0118 | 0.038, -0.0002, 0.0114, 0.0119 | 0.113, 0.0098, 0.0115, 0.012  | 0.683, 0.0298, 0.0116, 0.0121 | 0.983, 0.0498, 0.0118, 0.0122 | 1.000, 0.0998, 0.0121, 0.0126 |
| cML-BIC            | 1.000, -0.1002, 0.0110, 0.0113 | 0.992, -0.0502, 0.0112, 0.0115 | 0.748, -0.0302, 0.0113, 0.0116 | 0.134, -0.0102, 0.0114, 0.0117 | 0.039, -0.0002, 0.0115, 0.0118 | 0.116, 0.0098, 0.0115, 0.0118 | 0.696, 0.0298, 0.0117, 0.0119 | 0.983, 0.0498, 0.0118, 0.0121 | 1.000, 0.0998, 0.0122, 0.0124 |
| cML-BIC-Profile    | 1.000, -0.1002, 0.0110, 0.0113 | 0.992, -0.0502, 0.0112, 0.0115 | 0.748, -0.0302, 0.0113, 0.0116 | 0.133, -0.0102, 0.0114, 0.0117 | 0.039, -0.0002, 0.0115, 0.0118 | 0.116, 0.0098, 0.0115, 0.0118 | 0.694, 0.0298, 0.0117, 0.012  | 0.983, 0.0498, 0.0118, 0.0121 | 1.000, 0.0998, 0.0122, 0.0125 |
| MR-Mix             | 0.791, -0.0984, 0.0371, 0.0869 | 0.656, -0.0480, 0.0252, 0.0907 | 0.440, -0.0285, 0.0220, 0.1039 | 0.089, -0.0091, 0.0205, 0.058  | 0.050, 0.0004, 0.0202, 0.0482  | 0.090, 0.0096, 0.0205, 0.0588 | 0.428, 0.0282, 0.0222, 0.0654 | 0.647, 0.0463, 0.0248, 0.0866 | 0.763, 0.0901, 0.0342, 0.066  |
| MR-ContMix         | 1.000, -0.1146, 0.0152, NA     | 0.923, -0.0663, 0.0186, NA     | 0.596, -0.0433, 0.0217, NA     | 0.145, -0.0158, 0.0249, NA     | 0.085, -0.0004, 0.0255, NA     | 0.131, 0.0147, 0.0252, NA     | 0.546, 0.0425, 0.0220, NA     | 0.905, 0.0668, 0.0191, NA     | 1.000, 0.1168, 0.0161, NA     |
| MR-Lasso           | 1.000, -0.0998, 0.0120, 0.0118 | 0.985, -0.0501, 0.0121, 0.012  | 0.697, -0.0300, 0.0122, 0.0121 | 0.135, -0.0102, 0.0124, 0.0122 | 0.047, -0.0001, 0.0124, 0.0123 | 0.133, 0.0098, 0.0124, 0.0124 | 0.654, 0.0297, 0.0126, 0.0125 | 0.974, 0.0495, 0.0125, 0.0126 | 1.000, 0.0996, 0.0130, 0.013  |
| MR-PRESSO          | 1.000, -0.0999, 0.0111, 0.0112 | 0.988, -0.0501, 0.0113, 0.0114 | 0.693, -0.0301, 0.0113, 0.0115 | 0.113, -0.0102, 0.0114, 0.0116 | 0.039, -0.0002, 0.0115, 0.0116 | 0.118, 0.0098, 0.0115, 0.0117 | 0.654, 0.0297, 0.0117, 0.0118 | 0.978, 0.0496, 0.0118, 0.0119 | 1.000, 0.0995, 0.0122, 0.0123 |
| MR-IVW             | 1.000, -0.0999, 0.0110, 0.012  | 0.988, -0.0501, 0.0111, 0.0122 | 0.694, -0.0301, 0.0112, 0.0123 | 0.108, -0.0102, 0.0113, 0.0124 | 0.032, -0.0002, 0.0114, 0.0125 | 0.100, 0.0098, 0.0115, 0.0126 | 0.654, 0.0297, 0.0116, 0.0127 | 0.977, 0.0497, 0.0117, 0.0128 | 1.000, 0.0995, 0.0121, 0.0132 |
| MR-IVW-Oracle      | 1.000, -0.0999, 0.0110, 0.012  | 0.988, -0.0501, 0.0111, 0.0122 | 0.694, -0.0301, 0.0112, 0.0123 | 0.108, -0.0102, 0.0113, 0.0124 | 0.032, -0.0002, 0.0114, 0.0125 | 0.100, 0.0098, 0.0115, 0.0126 | 0.654, 0.0297, 0.0116, 0.0127 | 0.977, 0.0497, 0.0117, 0.0128 | 1.000, 0.0995, 0.0121, 0.0132 |
| MR-Egger           | 0.309, -0.0922, 0.0622, 0.0637 | 0.109, -0.0456, 0.0633, 0.065  | 0.067, -0.0270, 0.0639, 0.0656 | 0.045, -0.0084, 0.0645, 0.0662 | 0.045, 0.0009, 0.0648, 0.0665  | 0.049, 0.0102, 0.0651, 0.0669 | 0.064, 0.0288, 0.0658, 0.0675 | 0.113, 0.0475, 0.0665, 0.0683 | 0.284, 0.0940, 0.0685, 0.0702 |
| MR-Weighted-Median | 1.000, -0.0990, 0.0138, 0.016  | 0.895, -0.0495, 0.0140, 0.0162 | 0.435, -0.0297, 0.0141, 0.0164 | 0.050, -0.0100, 0.0142, 0.0165 | 0.018, -0.0001, 0.0143, 0.0166 | 0.067, 0.0098, 0.0144, 0.0167 | 0.405, 0.0296, 0.0146, 0.0169 | 0.848, 0.0494, 0.0148, 0.0171 | 1.000, 0.0989, 0.0153, 0.0176 |
| MR-Weighted-Mode   | 0.973, -0.0990, 0.0207, 0.0267 | 0.456, -0.0494, 0.0209, 0.0272 | 0.131, -0.0298, 0.0210, 0.0274 | 0.015, -0.0099, 0.0212, 0.0277 | 0.005, 0.0000, 0.0213, 0.0278  | 0.012, 0.0099, 0.0214, 0.028  | 0.121, 0.0297, 0.0217, 0.0282 | 0.429, 0.0493, 0.0219, 0.0285 | 0.942, 0.0985, 0.0226, 0.0294 |
| MR-RAPS1           | 1.000, -0.1002, 0.0110, 0.0119 | 0.989, -0.0502, 0.0112, 0.0121 | 0.709, -0.0302, 0.0113, 0.0122 | 0.114, -0.0102, 0.0114, 0.0123 | 0.033, -0.0002, 0.0114, 0.0124 | 0.101, 0.0098, 0.0115, 0.0124 | 0.661, 0.0298, 0.0116, 0.0126 | 0.978, 0.0498, 0.0118, 0.0127 | 1.000, 0.0997, 0.0121, 0.0131 |
| MR-RAPS2           | 1.000, 0.1615, 1.2017, 0.0237  | 0.986, 0.0071, 2.4534, 0.0363  | 0.698, 0.0861, 2.9466, 0.0348  | 0.128, 0.0990, 1.5865, 0.0199  | 0.046, -0.0036, 1.0167, 0.016  | 0.131, 0.1293, 1.6882, 0.0217 | 0.653, 0.1774, 2.6544, 0.0358 | 0.974, 0.1085, 2.3809, 0.0362 | 1.000, 0.2511, 1.7903, 0.0319 |
| MR-RAPS3           | 1.000, -0.1002, 0.0110, 0.0113 | 0.993, -0.0502, 0.0112, 0.0115 | 0.748, -0.0302, 0.0113, 0.0116 | 0.134, -0.0102, 0.0114, 0.0117 | 0.039, -0.0002, 0.0118, 0.0118 | 0.116, 0.0098, 0.0115, 0.0118 | 0.699, 0.0298, 0.0116, 0.012  | 0.983, 0.0498, 0.0118, 0.0121 | 1.000, 0.0998, 0.0121, 0.0125 |
| MR-RAPS4           | 1.000, -0.1002, 0.0113, 0.0116 | 0.991, -0.0502, 0.0115, 0.0118 | 0.725, -0.0302, 0.0115, 0.0119 | 0.128, -0.0102, 0.0116, 0.012  | 0.040, -0.0002, 0.0117, 0.0121 | 0.118, 0.0098, 0.0118, 0.0121 | 0.667, 0.0298, 0.0119, 0.0123 | 0.983, 0.0498, 0.0120, 0.0124 | 1.000, 0.0998, 0.0124, 0.0128 |

Table S49: Main simulations: in each cell, from top to bottom are empirical type-I error/power, mean( $\hat{\theta}$ ), SD( $\hat{\theta}$ ), mean( $SE(\hat{\theta})$ ) when  $m = 20$ , the ideal case of  $q = 0$ , and  $n = 200000$ .

| Methods \ $\theta$ | -0.1                           | -0.05                          | -0.03                          | -0.01                          | 0                              | 0.01                          | 0.03                          | 0.05                          | 0.1                           |
|--------------------|--------------------------------|--------------------------------|--------------------------------|--------------------------------|--------------------------------|-------------------------------|-------------------------------|-------------------------------|-------------------------------|
| cML-MA-AIC         | 1.000, -0.0963, 0.0110, 0.0101 | 0.981, -0.0464, 0.0112, 0.0102 | 0.703, -0.0265, 0.0111, 0.0103 | 0.130, -0.0080, 0.0099, 0.0101 | 0.031, 0.0001, 0.0094, 0.0101  | 0.140, 0.0083, 0.0099, 0.0102 | 0.686, 0.0266, 0.0113, 0.0106 | 0.963, 0.0464, 0.0117, 0.0108 | 0.999, 0.0961, 0.0121, 0.0111 |
| cML-MA-AIC-Profile | 1.000, -0.0965, 0.0110, 0.0101 | 0.981, -0.0464, 0.0113, 0.0103 | 0.702, -0.0265, 0.0112, 0.0103 | 0.130, -0.0080, 0.0099, 0.0101 | 0.030, 0.0001, 0.0094, 0.0101  | 0.139, 0.0083, 0.0099, 0.0102 | 0.685, 0.0266, 0.0114, 0.0106 | 0.963, 0.0464, 0.0117, 0.0108 | 0.999, 0.0963, 0.0122, 0.0112 |
| cML-AIC            | 1.000, -0.0983, 0.0116, 0.0087 | 0.989, -0.0482, 0.0119, 0.0088 | 0.808, -0.0282, 0.0121, 0.0089 | 0.242, -0.0089, 0.0116, 0.009  | 0.107, 0.0002, 0.0113, 0.009   | 0.259, 0.0093, 0.0117, 0.0091 | 0.793, 0.0285, 0.0125, 0.0092 | 0.984, 0.0484, 0.0129, 0.0093 | 1.000, 0.0983, 0.0129, 0.0096 |
| cML-AIC-Profile    | 1.000, -0.0984, 0.0117, 0.0087 | 0.989, -0.0483, 0.0119, 0.0089 | 0.808, -0.0282, 0.0121, 0.0089 | 0.242, -0.0089, 0.0116, 0.009  | 0.106, 0.0002, 0.0113, 0.0091  | 0.259, 0.0093, 0.0117, 0.0091 | 0.793, 0.0285, 0.0125, 0.0092 | 0.984, 0.0484, 0.0126, 0.0093 | 1.000, 0.0984, 0.0130, 0.0096 |
| cML-MA-BIC         | 1.000, -0.1001, 0.0078, 0.008  | 1.000, -0.0501, 0.0080, 0.0082 | 0.967, -0.0301, 0.0081, 0.0082 | 0.234, -0.0101, 0.0081, 0.0083 | 0.041, -0.0001, 0.0082, 0.0084 | 0.226, 0.0099, 0.0082, 0.0084 | 0.946, 0.0299, 0.0083, 0.0085 | 1.000, 0.0499, 0.0084, 0.0086 | 1.000, 0.0999, 0.0087, 0.0089 |
| cML-MA-BIC-Profile | 1.000, -0.1001, 0.0078, 0.008  | 1.000, -0.0501, 0.0080, 0.0082 | 0.967, -0.0301, 0.0081, 0.0083 | 0.233, -0.0101, 0.0081, 0.0083 | 0.041, -0.0001, 0.0082, 0.0084 | 0.226, 0.0099, 0.0082, 0.0084 | 0.946, 0.0299, 0.0083, 0.0085 | 1.000, 0.0499, 0.0084, 0.0086 | 1.000, 0.0999, 0.0087, 0.0089 |
| cML-BIC            | 1.000, -0.1001, 0.0079, 0.008  | 1.000, -0.0501, 0.0080, 0.0081 | 0.968, -0.0301, 0.0081, 0.0082 | 0.238, -0.0101, 0.0081, 0.0083 | 0.046, -0.0001, 0.0082, 0.0083 | 0.231, 0.0099, 0.0082, 0.0083 | 0.948, 0.0299, 0.0083, 0.0084 | 1.000, 0.0499, 0.0084, 0.0085 | 1.000, 0.0999, 0.0087, 0.0088 |
| cML-BIC-Profile    | 1.000, -0.1001, 0.0079, 0.008  | 1.000, -0.0501, 0.0080, 0.0081 | 0.968, -0.0301, 0.0081, 0.0082 | 0.238, -0.0101, 0.0081, 0.0083 | 0.046, -0.0001, 0.0082, 0.0083 | 0.231, 0.0099, 0.0082, 0.0083 | 0.948, 0.0299, 0.0083, 0.0084 | 1.000, 0.0499, 0.0084, 0.0085 | 1.000, 0.0999, 0.0087, 0.0088 |
| MR-Mix             | 0.828, -0.0985, 0.0335, 0.0296 | 0.751, -0.0476, 0.0201, 0.1742 | 0.606, -0.0283, 0.0159, 0.379  | 0.140, -0.0094, 0.0138, 0.0608 | 0.061, 0.0002, 0.0135, 0.0518  | 0.157, 0.0095, 0.0137, 0.0487 | 0.627, 0.0281, 0.0161, 0.0422 | 0.736, 0.0462, 0.0198, 0.0668 | 0.829, 0.0894, 0.0319, 0.0301 |
| MR-ContMix         | 1.000, -0.1073, 0.0094, NA     | 0.997, -0.0613, 0.0118, NA     | 0.836, -0.0407, 0.0139, NA     | 0.205, -0.0145, 0.0169, NA     | 0.071, 0.0003, 0.0175, NA      | 0.223, 0.0149, 0.0166, NA     | 0.817, 0.0402, 0.0138, NA     | 0.996, 0.0612, 0.0119, NA     | 1.000, 0.1086, 0.0102, NA     |
| MR-Lasso           | 1.000, -0.1000, 0.0084, 0.0083 | 0.999, -0.0501, 0.0086, 0.0084 | 0.936, -0.0301, 0.0085, 0.0085 | 0.234, -0.0101, 0.0087, 0.0086 | 0.050, -0.0001, 0.0088, 0.0086 | 0.223, 0.0099, 0.0088, 0.0087 | 0.929, 0.0299, 0.0089, 0.0088 | 1.000, 0.0499, 0.0088, 0.0089 | 1.000, 0.0998, 0.0093, 0.0091 |
| MR-PRESSO          | 1.000, -0.1000, 0.0079, 0.0078 | 1.000, -0.0501, 0.0080, 0.0079 | 0.945, -0.0301, 0.0081, 0.008  | 0.221, -0.0101, 0.0082, 0.0081 | 0.039, -0.0001, 0.0082, 0.0081 | 0.219, 0.0098, 0.0083, 0.0082 | 0.921, 0.0298, 0.0083, 0.0083 | 1.000, 0.0498, 0.0084, 0.0083 | 1.000, 0.0997, 0.0087, 0.0086 |
| MR-IVW             | 1.000, -0.1000, 0.0078, 0.0084 | 1.000, -0.0500, 0.0080, 0.0086 | 0.949, -0.0301, 0.0081, 0.0086 | 0.211, -0.0101, 0.0081, 0.0087 | 0.033, -0.0001, 0.0082, 0.0088 | 0.210, 0.0099, 0.0082, 0.0088 | 0.929, 0.0299, 0.0083, 0.0089 | 1.000, 0.0498, 0.0084, 0.009  | 1.000, 0.0998, 0.0087, 0.0093 |
| MR-IVW-Oracle      | 1.000, -0.1000, 0.0078, 0.0084 | 1.000, -0.0500, 0.0080, 0.0086 | 0.949, -0.0301, 0.0081, 0.0086 | 0.211, -0.0101, 0.0081, 0.0087 | 0.033, -0.0001, 0.0082, 0.0088 | 0.210, 0.0099, 0.0082, 0.0088 | 0.929, 0.0299, 0.0083, 0.0089 | 1.000, 0.0498, 0.0084, 0.009  | 1.000, 0.0998, 0.0087, 0.0093 |
| MR-Egger           | 0.562, -0.0964, 0.0443, 0.0455 | 0.185, -0.0482, 0.0452, 0.0464 | 0.095, -0.0290, 0.0457, 0.0469 | 0.044, -0.0097, 0.0462, 0.0473 | 0.042, -0.0001, 0.0464, 0.0476 | 0.049, 0.0096, 0.0467, 0.0478 | 0.080, 0.0288, 0.0472, 0.0483 | 0.174, 0.0481, 0.0478, 0.0488 | 0.492, 0.0962, 0.0493, 0.0502 |
| MR-Weighted-Median | 1.000, -0.0997, 0.0099, 0.0112 | 0.996, -0.0499, 0.0101, 0.0114 | 0.756, -0.0300, 0.0102, 0.0115 | 0.114, -0.0101, 0.0103, 0.0116 | 0.019, -0.0002, 0.0103, 0.0117 | 0.117, 0.0098, 0.0104, 0.0117 | 0.724, 0.0297, 0.0105, 0.0119 | 0.994, 0.0496, 0.0106, 0.012  | 1.000, 0.0994, 0.0109, 0.0124 |
| MR-Weighted-Mode   | 1.000, -0.0994, 0.0144, 0.0187 | 0.786, -0.0498, 0.0147, 0.019  | 0.345, -0.0299, 0.0148, 0.0192 | 0.020, -0.0102, 0.0150, 0.0194 | 0.007, -0.0004, 0.0151, 0.0195 | 0.026, 0.0095, 0.0152, 0.0196 | 0.305, 0.0295, 0.0153, 0.0198 | 0.740, 0.0494, 0.0155, 0.02   | 0.999, 0.0993, 0.0159, 0.0206 |
| MR-RAPS1           | 1.000, -0.1001, 0.0079, 0.0083 | 1.000, -0.0501, 0.0080, 0.0085 | 0.952, -0.0301, 0.0081, 0.0086 | 0.219, -0.0101, 0.0082, 0.0086 | 0.035, -0.0001, 0.0082, 0.0087 | 0.215, 0.0099, 0.0082, 0.0087 | 0.930, 0.0299, 0.0083, 0.0088 | 1.000, 0.0499, 0.0084, 0.0089 | 1.000, 0.0999, 0.0087, 0.0092 |
| MR-RAPS2           | 1.000, -0.0230, 0.2890, 0.0105 | 1.000, -0.0397, 0.1738, 0.0202 | 0.943, 0.0841, 3.4025, 0.025   | 0.235, 0.1322, 2.6761, 0.0189  | 0.052, 0.1164, 1.2820, 0.0128  | 0.238, 0.0919, 1.9255, 0.0197 | 0.925, 0.0723, 1.5577, 0.0239 | 1.000, 0.0851, 1.1493, 0.021  | 1.000, 0.1477, 0.4888, 0.0138 |
| MR-RAPS3           | 1.000, -0.1001, 0.0078, 0.008  | 1.000, -0.0501, 0.0080, 0.0081 | 0.967, -0.0301, 0.0082, 0.0082 | 0.239, -0.0101, 0.0081, 0.0083 | 0.046, -0.0001, 0.0082, 0.0083 | 0.230, 0.0099, 0.0082, 0.0083 | 0.947, 0.0299, 0.0083, 0.0084 | 1.000, 0.0499, 0.0084, 0.0085 | 1.000, 0.0999, 0.0087, 0.0088 |
| MR-RAPS4           | 1.000, -0.1001, 0.0080, 0.0082 | 1.000, -0.0501, 0.0082, 0.0083 | 0.956, -0.0301, 0.0082, 0.0084 | 0.224, -0.0101, 0.0083, 0.0085 | 0.039, -0.0001, 0.0083, 0.0085 | 0.221, 0.0099, 0.0084, 0.0086 | 0.943, 0.0299, 0.0085, 0.0086 | 1.000, 0.0499, 0.0086, 0.0087 | 1.000, 0.0999, 0.0089, 0.009  |

Table S50: Main simulations: in each cell, from top to bottom are empirical type-I error/power, mean( $\hat{\theta}$ ), SD( $\hat{\theta}$ ), mean(SE( $\hat{\theta}$ )) when  $m = 20$ , the InSIDE satisfied,  $q = 0.2$ , and  $n = 50000$ .

| Methods \ $\theta$ | -0.1                                    | -0.05                                   | -0.03                                   | -0.01                                   | 0                                       | 0.01                                   | 0.03                                   | 0.05                                   | 0.1                                    |
|--------------------|-----------------------------------------|-----------------------------------------|-----------------------------------------|-----------------------------------------|-----------------------------------------|----------------------------------------|----------------------------------------|----------------------------------------|----------------------------------------|
| cML-MA-AIC         | 0.941,<br>-0.0908,<br>0.0249,<br>0.0234 | 0.460,<br>-0.0423,<br>0.0236,<br>0.0234 | 0.178,<br>-0.0244,<br>0.0221,<br>0.0232 | 0.044,<br>-0.0080,<br>0.0204,<br>0.0232 | 0.033,<br>-0.0004,<br>0.0202,<br>0.0233 | 0.046,<br>0.0070,<br>0.0207,<br>0.0234 | 0.153,<br>0.0231,<br>0.0225,<br>0.0239 | 0.404,<br>0.0405,<br>0.0248,<br>0.0245 | 0.886,<br>0.0884,<br>0.0275,<br>0.0257 |
| cML-MA-AIC-Profile | 0.941,<br>-0.0911,<br>0.0250,<br>0.0235 | 0.458,<br>-0.0423,<br>0.0236,<br>0.0236 | 0.177,<br>-0.0244,<br>0.0221,<br>0.0234 | 0.044,<br>-0.0080,<br>0.0204,<br>0.0233 | 0.031,<br>-0.0004,<br>0.0202,<br>0.0234 | 0.045,<br>0.0070,<br>0.0207,<br>0.0236 | 0.151,<br>0.0231,<br>0.0225,<br>0.024  | 0.399,<br>0.0406,<br>0.0248,<br>0.0246 | 0.884,<br>0.0886,<br>0.0276,<br>0.0259 |
| cML-AIC            | 0.966,<br>-0.0956,<br>0.0267,<br>0.0198 | 0.638,<br>-0.0467,<br>0.0260,<br>0.0202 | 0.331,<br>-0.0278,<br>0.0254,<br>0.0204 | 0.115,<br>-0.0095,<br>0.0247,<br>0.0206 | 0.098,<br>-0.0009,<br>0.0248,<br>0.0207 | 0.121,<br>0.0077,<br>0.0252,<br>0.0208 | 0.280,<br>0.0258,<br>0.0264,<br>0.021  | 0.549,<br>0.0444,<br>0.0277,<br>0.0212 | 0.952,<br>0.0934,<br>0.0290,<br>0.0218 |
| cML-AIC-Profile    | 0.966,<br>-0.0958,<br>0.0268,<br>0.02   | 0.636,<br>-0.0468,<br>0.0261,<br>0.0203 | 0.328,<br>-0.0279,<br>0.0254,<br>0.0205 | 0.115,<br>-0.0095,<br>0.0247,<br>0.0207 | 0.098,<br>-0.0009,<br>0.0248,<br>0.0208 | 0.122,<br>0.0078,<br>0.0253,<br>0.0209 | 0.277,<br>0.0258,<br>0.0264,<br>0.0211 | 0.548,<br>0.0444,<br>0.0277,<br>0.0213 | 0.951,<br>0.0936,<br>0.0291,<br>0.022  |
| cML-MA-BIC         | 1.000,<br>-0.1000,<br>0.0189,<br>0.0185 | 0.753,<br>-0.0500,<br>0.0192,<br>0.0188 | 0.367,<br>-0.0300,<br>0.0193,<br>0.0189 | 0.086,<br>-0.0101,<br>0.0195,<br>0.0191 | 0.052,<br>-0.0001,<br>0.0196,<br>0.0192 | 0.083,<br>0.0099,<br>0.0197,<br>0.0193 | 0.341,<br>0.0298,<br>0.0199,<br>0.0195 | 0.702,<br>0.0498,<br>0.0202,<br>0.0197 | 0.997,<br>0.0998,<br>0.0208,<br>0.0203 |
| cML-MA-BIC-Profile | 1.000,<br>-0.1000,<br>0.0189,<br>0.0185 | 0.749,<br>-0.0500,<br>0.0192,<br>0.0188 | 0.364,<br>-0.0300,<br>0.0193,<br>0.019  | 0.083,<br>-0.0101,<br>0.0195,<br>0.0192 | 0.052,<br>-0.0001,<br>0.0196,<br>0.0193 | 0.083,<br>0.0099,<br>0.0197,<br>0.0193 | 0.339,<br>0.0298,<br>0.0199,<br>0.0195 | 0.701,<br>0.0498,<br>0.0202,<br>0.0198 | 0.997,<br>0.0998,<br>0.0208,<br>0.0203 |
| cML-BIC            | 1.000,<br>-0.1000,<br>0.0189,<br>0.0185 | 0.754,<br>-0.0499,<br>0.0193,<br>0.0185 | 0.372,<br>-0.0300,<br>0.0194,<br>0.0187 | 0.091,<br>-0.0100,<br>0.0196,<br>0.0189 | 0.053,<br>0.0000,<br>0.0197,<br>0.019   | 0.092,<br>0.0100,<br>0.0198,<br>0.019  | 0.357,<br>0.0300,<br>0.0200,<br>0.0192 | 0.716,<br>0.0500,<br>0.0202,<br>0.0195 | 0.997,<br>0.1000,<br>0.0208,<br>0.02   |
| cML-BIC-Profile    | 1.000,<br>-0.1000,<br>0.0189,<br>0.0183 | 0.751,<br>-0.0499,<br>0.0193,<br>0.0186 | 0.371,<br>-0.0300,<br>0.0194,<br>0.0188 | 0.091,<br>-0.0100,<br>0.0196,<br>0.0189 | 0.053,<br>0.0000,<br>0.0197,<br>0.019   | 0.092,<br>0.0100,<br>0.0198,<br>0.0191 | 0.355,<br>0.0300,<br>0.0200,<br>0.0193 | 0.715,<br>0.0500,<br>0.0202,<br>0.0195 | 0.997,<br>0.1000,<br>0.0208,<br>0.0201 |
| MR-Mix             | 0.934,<br>-0.1049,<br>0.0237,<br>0.0311 | 0.387,<br>-0.0508,<br>0.0234,<br>0.0308 | 0.119,<br>-0.0297,<br>0.0234,<br>0.0307 | 0.017,<br>-0.0091,<br>0.0233,<br>0.0307 | 0.013,<br>0.0010,<br>0.0232,<br>0.0307  | 0.030,<br>0.0111,<br>0.0232,<br>0.0307 | 0.127,<br>0.0309,<br>0.0233,<br>0.0306 | 0.378,<br>0.0503,<br>0.0233,<br>0.0306 | 0.924,<br>0.0973,<br>0.0233,<br>0.0305 |
| MR-ContMix         | 1.000,<br>-0.0997,<br>0.0200,<br>NA     | 0.725,<br>-0.0502,<br>0.0204,<br>NA     | 0.358,<br>-0.0303,<br>0.0205,<br>NA     | 0.098,<br>-0.0104,<br>0.0206,<br>NA     | 0.059,<br>-0.0005,<br>0.0207,<br>NA     | 0.089,<br>0.0095,<br>0.0209,<br>NA     | 0.327,<br>0.0294,<br>0.0211,<br>NA     | 0.677,<br>0.0492,<br>0.0214,<br>NA     | 0.993,<br>0.0989,<br>0.0222,<br>NA     |
| MR-Lasso           | 1.000,<br>-0.0997,<br>0.0192,<br>0.0191 | 0.730,<br>-0.0499,<br>0.0197,<br>0.0194 | 0.334,<br>-0.0300,<br>0.0197,<br>0.0196 | 0.085,<br>-0.0101,<br>0.0199,<br>0.0198 | 0.050,<br>-0.0002,<br>0.0199,<br>0.0199 | 0.080,<br>0.0098,<br>0.0201,<br>0.02   | 0.318,<br>0.0296,<br>0.0204,<br>0.0202 | 0.668,<br>0.0496,<br>0.0206,<br>0.0204 | 0.996,<br>0.0994,<br>0.0212,<br>0.021  |
| MR-PRESSO          | 0.877,<br>-0.1010,<br>0.0629,<br>0.0209 | 0.652,<br>-0.0522,<br>0.0626,<br>0.021  | 0.461,<br>-0.0324,<br>0.0610,<br>0.0208 | 0.303,<br>-0.0130,<br>0.0617,<br>0.021  | 0.258,<br>-0.0036,<br>0.0620,<br>0.0211 | 0.286,<br>0.0058,<br>0.0611,<br>0.0211 | 0.409,<br>0.0258,<br>0.0604,<br>0.0211 | 0.599,<br>0.0457,<br>0.0593,<br>0.0212 | 0.867,<br>0.0953,<br>0.0581,<br>0.0214 |
| MR-IVW             | 0.107,<br>-0.1078,<br>0.1697,<br>0.1654 | 0.089,<br>-0.0579,<br>0.1696,<br>0.1654 | 0.083,<br>-0.0379,<br>0.1696,<br>0.1654 | 0.088,<br>-0.0179,<br>0.1696,<br>0.1654 | 0.085,<br>-0.0079,<br>0.1696,<br>0.1654 | 0.086,<br>0.0020,<br>0.1696,<br>0.1654 | 0.083,<br>0.0220,<br>0.1696,<br>0.1654 | 0.082,<br>0.0420,<br>0.1696,<br>0.1654 | 0.097,<br>0.0919,<br>0.1696,<br>0.1654 |
| MR-IVW-Oracle      | 1.000,<br>-0.0994,<br>0.0186,<br>0.0193 | 0.722,<br>-0.0497,<br>0.0190,<br>0.0197 | 0.318,<br>-0.0298,<br>0.0191,<br>0.0198 | 0.073,<br>-0.0099,<br>0.0193,<br>0.02   | 0.041,<br>0.0000,<br>0.0194,<br>0.0201  | 0.071,<br>0.0100,<br>0.0195,<br>0.0202 | 0.314,<br>0.0298,<br>0.0197,<br>0.0204 | 0.667,<br>0.0497,<br>0.0199,<br>0.0206 | 0.996,<br>0.0995,<br>0.0205,<br>0.0212 |
| MR-Egger           | 0.071,<br>-0.0209,<br>0.8701,<br>0.8466 | 0.074,<br>0.0223,<br>0.8701,<br>0.8466  | 0.075,<br>0.0396,<br>0.8702,<br>0.8466  | 0.075,<br>0.0568,<br>0.8702,<br>0.8466  | 0.075,<br>0.0655,<br>0.8702,<br>0.8466  | 0.076,<br>0.0741,<br>0.8703,<br>0.8467 | 0.076,<br>0.0914,<br>0.8703,<br>0.8467 | 0.076,<br>0.1086,<br>0.8704,<br>0.8467 | 0.072,<br>0.1518,<br>0.8705,<br>0.8468 |
| MR-Weighted-Median | 0.973,<br>-0.0974,<br>0.0226,<br>0.0254 | 0.487,<br>-0.0489,<br>0.0230,<br>0.0258 | 0.175,<br>-0.0294,<br>0.0232,<br>0.026  | 0.041,<br>-0.0100,<br>0.0235,<br>0.0263 | 0.025,<br>-0.0003,<br>0.0236,<br>0.0264 | 0.043,<br>0.0094,<br>0.0237,<br>0.0265 | 0.158,<br>0.0289,<br>0.0239,<br>0.0268 | 0.432,<br>0.0484,<br>0.0242,<br>0.0271 | 0.949,<br>0.0971,<br>0.0252,<br>0.0279 |
| MR-Weighted-Mode   | 0.916,<br>-0.0980,<br>0.0263,<br>0.0308 | 0.344,<br>-0.0490,<br>0.0268,<br>0.0314 | 0.123,<br>-0.0297,<br>0.0272,<br>0.0316 | 0.023,<br>-0.0100,<br>0.0274,<br>0.0319 | 0.023,<br>-0.0001,<br>0.0277,<br>0.0321 | 0.032,<br>0.0097,<br>0.0277,<br>0.0322 | 0.117,<br>0.0292,<br>0.0283,<br>0.0326 | 0.298,<br>0.0488,<br>0.0285,<br>0.0329 | 0.862,<br>0.0977,<br>0.0296,<br>0.0339 |
| MR-RAPS1           | 0.105,<br>-0.1083,<br>0.1668,<br>0.1618 | 0.086,<br>-0.0583,<br>0.1669,<br>0.1618 | 0.096,<br>-0.0382,<br>0.1669,<br>0.1618 | 0.099,<br>-0.0182,<br>0.1669,<br>0.1619 | 0.101,<br>-0.0082,<br>0.1669,<br>0.1619 | 0.100,<br>0.0018,<br>0.1669,<br>0.1619 | 0.090,<br>0.0218,<br>0.1670,<br>0.1619 | 0.080,<br>0.0418,<br>0.1670,<br>0.1619 | 0.092,<br>0.0918,<br>0.1671,<br>0.162  |
| MR-RAPS2           | 0.991,<br>0.2414,<br>3.4866,<br>0.0498  | 0.905,<br>0.2583,<br>3.3666,<br>0.035   | 0.778,<br>0.2497,<br>2.7536,<br>0.036   | 0.636,<br>0.3900,<br>3.9040,<br>0.0362  | 0.646,<br>0.5145,<br>5.0016,<br>0.0405  | 0.658,<br>0.3228,<br>3.0375,<br>0.0341 | 0.782,<br>0.5106,<br>3.2553,<br>0.0388 | 0.907,<br>0.3514,<br>3.7643,<br>0.0422 | 0.994,<br>0.2625,<br>3.8922,<br>0.0483 |
| MR-RAPS3           | 0.901,<br>-0.2260,<br>0.3464,<br>0.0404 | 0.848,<br>-0.1187,<br>0.3423,<br>0.0393 | 0.829,<br>-0.0770,<br>0.3387,<br>0.0387 | 0.828,<br>-0.0363,<br>0.3341,<br>0.0382 | 0.831,<br>-0.0164,<br>0.3315,<br>0.038  | 0.829,<br>0.0032,<br>0.3287,<br>0.0377 | 0.847,<br>0.0414,<br>0.3227,<br>0.0372 | 0.871,<br>0.0784,<br>0.3162,<br>0.0366 | 0.889,<br>0.1649,<br>0.2989,<br>0.0355 |
| MR-RAPS4           | 1.000,<br>-0.2182,<br>1.1830,<br>0.0353 | 0.968,<br>-0.0554,<br>1.1372,<br>0.0333 | 0.901,<br>0.0073,<br>1.1520,<br>0.0335  | 0.849,<br>0.1234,<br>1.1165,<br>0.0323  | 0.837,<br>0.1738,<br>1.0960,<br>0.0319  | 0.847,<br>0.2090,<br>1.0959,<br>0.0321 | 0.898,<br>0.3159,<br>1.1012,<br>0.0327 | 0.956,<br>0.3864,<br>1.0980,<br>0.033  | 1.000,<br>0.5563,<br>1.0458,<br>0.0329 |



Table S51: Main simulations: in each cell, from top to bottom are empirical type-I error/power, mean( $\hat{\theta}$ ), SD( $\hat{\theta}$ ), mean(SE( $\hat{\theta}$ )) when  $m = 20$ , the InSIDE satisfied,  $q = 0.2$ , and  $n = 100000$ .

| Methods \ $\theta$ | -0.1                                    | -0.05                                   | -0.03                                   | -0.01                                   | 0                                       | 0.01                                   | 0.03                                   | 0.05                                   | 0.1                                    |
|--------------------|-----------------------------------------|-----------------------------------------|-----------------------------------------|-----------------------------------------|-----------------------------------------|----------------------------------------|----------------------------------------|----------------------------------------|----------------------------------------|
| cML-MA-AIC         | 0.993,<br>-0.0933,<br>0.0183,<br>0.0166 | 0.718,<br>-0.0436,<br>0.0183,<br>0.0168 | 0.335,<br>-0.0248,<br>0.0173,<br>0.0166 | 0.070,<br>-0.0079,<br>0.0157,<br>0.0164 | 0.044,<br>-0.0003,<br>0.0156,<br>0.0164 | 0.076,<br>0.0076,<br>0.0160,<br>0.0166 | 0.323,<br>0.0246,<br>0.0177,<br>0.0171 | 0.681,<br>0.0434,<br>0.0193,<br>0.0175 | 0.983,<br>0.0925,<br>0.0206,<br>0.0182 |
| cML-MA-AIC-Profile | 0.993,<br>-0.0935,<br>0.0184,<br>0.0167 | 0.715,<br>-0.0437,<br>0.0184,<br>0.0168 | 0.333,<br>-0.0248,<br>0.0173,<br>0.0167 | 0.070,<br>-0.0079,<br>0.0157,<br>0.0165 | 0.044,<br>-0.0003,<br>0.0156,<br>0.0165 | 0.074,<br>0.0076,<br>0.0160,<br>0.0166 | 0.322,<br>0.0247,<br>0.0177,<br>0.0171 | 0.680,<br>0.0434,<br>0.0193,<br>0.0176 | 0.983,<br>0.0927,<br>0.0207,<br>0.0183 |
| cML-AIC            | 0.996,<br>-0.0968,<br>0.0195,<br>0.014  | 0.837,<br>-0.0472,<br>0.0198,<br>0.0143 | 0.505,<br>-0.0277,<br>0.0195,<br>0.0144 | 0.173,<br>-0.0094,<br>0.0188,<br>0.0146 | 0.124,<br>-0.0007,<br>0.0188,<br>0.0146 | 0.175,<br>0.0084,<br>0.0190,<br>0.0147 | 0.476,<br>0.0271,<br>0.0199,<br>0.0148 | 0.788,<br>0.0465,<br>0.0210,<br>0.015  | 0.995,<br>0.0962,<br>0.0219,<br>0.0154 |
| cML-AIC-Profile    | 0.996,<br>-0.0970,<br>0.0195,<br>0.0141 | 0.835,<br>-0.0473,<br>0.0198,<br>0.0143 | 0.505,<br>-0.0277,<br>0.0195,<br>0.0145 | 0.172,<br>-0.0094,<br>0.0188,<br>0.0146 | 0.123,<br>-0.0007,<br>0.0188,<br>0.0147 | 0.173,<br>0.0084,<br>0.0190,<br>0.0148 | 0.475,<br>0.0271,<br>0.0199,<br>0.0149 | 0.787,<br>0.0465,<br>0.0210,<br>0.0151 | 0.994,<br>0.0963,<br>0.0219,<br>0.0155 |
| cML-MA-BIC         | 1.000,<br>-0.1001,<br>0.0134,<br>0.013  | 0.960,<br>-0.0501,<br>0.0137,<br>0.0133 | 0.612,<br>-0.0301,<br>0.0138,<br>0.0134 | 0.123,<br>-0.0102,<br>0.0139,<br>0.0135 | 0.050,<br>-0.0002,<br>0.0140,<br>0.0136 | 0.120,<br>0.0098,<br>0.0141,<br>0.0136 | 0.586,<br>0.0297,<br>0.0143,<br>0.0138 | 0.939,<br>0.0497,<br>0.0144,<br>0.0139 | 1.000,<br>0.0997,<br>0.0149,<br>0.0143 |
| cML-MA-BIC-Profile | 1.000,<br>-0.1001,<br>0.0134,<br>0.0131 | 0.960,<br>-0.0501,<br>0.0137,<br>0.0133 | 0.610,<br>-0.0301,<br>0.0138,<br>0.0134 | 0.122,<br>-0.0102,<br>0.0139,<br>0.0135 | 0.050,<br>-0.0002,<br>0.0140,<br>0.0136 | 0.120,<br>0.0098,<br>0.0141,<br>0.0137 | 0.585,<br>0.0297,<br>0.0143,<br>0.0138 | 0.938,<br>0.0497,<br>0.0144,<br>0.0139 | 1.000,<br>0.0997,<br>0.0149,<br>0.0144 |
| cML-BIC            | 1.000,<br>-0.1002,<br>0.0134,<br>0.0129 | 0.966,<br>-0.0502,<br>0.0137,<br>0.0131 | 0.621,<br>-0.0302,<br>0.0138,<br>0.0132 | 0.130,<br>-0.0102,<br>0.0140,<br>0.0134 | 0.056,<br>-0.0002,<br>0.0140,<br>0.0134 | 0.124,<br>0.0098,<br>0.0141,<br>0.0135 | 0.597,<br>0.0298,<br>0.0143,<br>0.0136 | 0.941,<br>0.0497,<br>0.0144,<br>0.0138 | 1.000,<br>0.0997,<br>0.0148,<br>0.0142 |
| cML-BIC-Profile    | 1.000,<br>-0.1002,<br>0.0134,<br>0.0129 | 0.965,<br>-0.0502,<br>0.0137,<br>0.0132 | 0.621,<br>-0.0302,<br>0.0138,<br>0.0133 | 0.130,<br>-0.0102,<br>0.0140,<br>0.0134 | 0.053,<br>-0.0002,<br>0.0140,<br>0.0134 | 0.124,<br>0.0098,<br>0.0141,<br>0.0135 | 0.597,<br>0.0298,<br>0.0143,<br>0.0137 | 0.941,<br>0.0497,<br>0.0144,<br>0.0138 | 1.000,<br>0.0997,<br>0.0148,<br>0.0142 |
| MR-Mix             | 0.997,<br>-0.1062,<br>0.0171,<br>0.0223 | 0.700,<br>-0.0522,<br>0.0171,<br>0.0221 | 0.259,<br>-0.0311,<br>0.0172,<br>0.0224 | 0.036,<br>-0.0104,<br>0.0173,<br>0.0221 | 0.013,<br>-0.0002,<br>0.0172,<br>0.0221 | 0.040,<br>0.0098,<br>0.0172,<br>0.022  | 0.246,<br>0.0296,<br>0.0172,<br>0.022  | 0.662,<br>0.0492,<br>0.0171,<br>0.022  | 0.990,<br>0.0958,<br>0.0172,<br>0.0221 |
| MR-ContMix         | 1.000,<br>-0.0997,<br>0.0141,<br>NA     | 0.943,<br>-0.0498,<br>0.0144,<br>NA     | 0.604,<br>-0.0299,<br>0.0145,<br>NA     | 0.133,<br>-0.0100,<br>0.0147,<br>NA     | 0.068,<br>0.0000,<br>0.0148,<br>NA      | 0.132,<br>0.0099,<br>0.0148,<br>NA     | 0.586,<br>0.0299,<br>0.0150,<br>NA     | 0.920,<br>0.0498,<br>0.0152,<br>NA     | 1.000,<br>0.0997,<br>0.0158,<br>NA     |
| MR-Lasso           | 1.000,<br>-0.0998,<br>0.0138,<br>0.0135 | 0.952,<br>-0.0501,<br>0.0142,<br>0.0138 | 0.587,<br>-0.0302,<br>0.0144,<br>0.0139 | 0.121,<br>-0.0102,<br>0.0146,<br>0.0141 | 0.062,<br>-0.0003,<br>0.0147,<br>0.0141 | 0.119,<br>0.0097,<br>0.0146,<br>0.0142 | 0.559,<br>0.0297,<br>0.0147,<br>0.0143 | 0.916,<br>0.0495,<br>0.0149,<br>0.0145 | 1.000,<br>0.0994,<br>0.0154,<br>0.0149 |
| MR-PRESSO          | 0.849,<br>-0.1053,<br>0.1180,<br>0.0314 | 0.714,<br>-0.0573,<br>0.1173,<br>0.0312 | 0.540,<br>-0.0375,<br>0.1166,<br>0.0308 | 0.363,<br>-0.0177,<br>0.1160,<br>0.0306 | 0.336,<br>-0.0080,<br>0.1154,<br>0.0305 | 0.357,<br>0.0018,<br>0.1153,<br>0.0306 | 0.540,<br>0.0219,<br>0.1146,<br>0.0303 | 0.689,<br>0.0419,<br>0.1136,<br>0.0299 | 0.825,<br>0.0898,<br>0.1090,<br>0.0285 |
| MR-IVW             | 0.108,<br>-0.1096,<br>0.1680,<br>0.1661 | 0.081,<br>-0.0596,<br>0.1680,<br>0.166  | 0.079,<br>-0.0396,<br>0.1680,<br>0.166  | 0.077,<br>-0.0196,<br>0.1679,<br>0.166  | 0.078,<br>-0.0096,<br>0.1679,<br>0.166  | 0.087,<br>0.0004,<br>0.1679,<br>0.166  | 0.079,<br>0.0204,<br>0.1679,<br>0.166  | 0.074,<br>0.0404,<br>0.1679,<br>0.166  | 0.081,<br>0.0904,<br>0.1679,<br>0.166  |
| MR-IVW-Oracle      | 1.000,<br>-0.0998,<br>0.0133,<br>0.0137 | 0.952,<br>-0.0500,<br>0.0136,<br>0.0139 | 0.580,<br>-0.0301,<br>0.0138,<br>0.0141 | 0.108,<br>-0.0102,<br>0.0138,<br>0.0142 | 0.045,<br>-0.0002,<br>0.0139,<br>0.0143 | 0.109,<br>0.0098,<br>0.0140,<br>0.0143 | 0.552,<br>0.0297,<br>0.0141,<br>0.0145 | 0.917,<br>0.0496,<br>0.0143,<br>0.0146 | 1.000,<br>0.0995,<br>0.0147,<br>0.0151 |
| MR-Egger           | 0.053,<br>-0.0970,<br>0.8833,<br>0.8867 | 0.052,<br>-0.0504,<br>0.8830,<br>0.8866 | 0.052,<br>-0.0318,<br>0.8828,<br>0.8866 | 0.049,<br>-0.0132,<br>0.8827,<br>0.8865 | 0.049,<br>-0.0039,<br>0.8826,<br>0.8865 | 0.047,<br>0.0054,<br>0.8826,<br>0.8865 | 0.046,<br>0.0240,<br>0.8824,<br>0.8865 | 0.047,<br>0.0426,<br>0.8823,<br>0.8865 | 0.051,<br>0.0891,<br>0.8820,<br>0.8865 |
| MR-Weighted-Median | 1.000,<br>-0.0987,<br>0.0165,<br>0.018  | 0.787,<br>-0.0493,<br>0.0168,<br>0.0183 | 0.357,<br>-0.0296,<br>0.0169,<br>0.0185 | 0.060,<br>-0.0098,<br>0.0171,<br>0.0186 | 0.026,<br>0.0000,<br>0.0172,<br>0.0187  | 0.058,<br>0.0099,<br>0.0173,<br>0.0188 | 0.343,<br>0.0295,<br>0.0175,<br>0.019  | 0.749,<br>0.0491,<br>0.0177,<br>0.0192 | 1.000,<br>0.0983,<br>0.0182,<br>0.0198 |
| MR-Weighted-Mode   | 0.995,<br>-0.0987,<br>0.0194,<br>0.0221 | 0.609,<br>-0.0495,<br>0.0197,<br>0.0225 | 0.240,<br>-0.0295,<br>0.0198,<br>0.0227 | 0.043,<br>-0.0099,<br>0.0200,<br>0.0228 | 0.019,<br>-0.0001,<br>0.0202,<br>0.023  | 0.039,<br>0.0099,<br>0.0203,<br>0.0231 | 0.228,<br>0.0295,<br>0.0205,<br>0.0233 | 0.577,<br>0.0493,<br>0.0208,<br>0.0236 | 0.985,<br>0.0987,<br>0.0214,<br>0.0243 |
| MR-RAPS1           | 0.095,<br>-0.1072,<br>0.1634,<br>0.1619 | 0.082,<br>-0.0572,<br>0.1634,<br>0.1619 | 0.088,<br>-0.0372,<br>0.1635,<br>0.1619 | 0.091,<br>-0.0172,<br>0.1635,<br>0.1619 | 0.093,<br>-0.0073,<br>0.1635,<br>0.1619 | 0.093,<br>0.0027,<br>0.1635,<br>0.1619 | 0.085,<br>0.0227,<br>0.1635,<br>0.162  | 0.070,<br>0.0427,<br>0.1635,<br>0.162  | 0.070,<br>0.0927,<br>0.1636,<br>0.162  |
| MR-RAPS2           | 0.997,<br>0.6928,<br>3.3134,<br>0.0357  | 0.983,<br>0.2831,<br>2.9407,<br>0.0227  | 0.867,<br>0.4724,<br>4.6226,<br>0.0231  | 0.706,<br>0.3816,<br>2.2356,<br>0.0231  | 0.680,<br>0.2261,<br>3.4411,<br>0.0228  | 0.728,<br>0.2819,<br>2.4180,<br>0.0246 | 0.884,<br>0.8065,<br>8.6537,<br>0.0295 | 0.977,<br>0.3940,<br>4.7269,<br>0.0299 | 0.993,<br>0.7312,<br>8.8020,<br>0.0378 |
| MR-RAPS3           | 0.925,<br>-0.2304,<br>0.3421,<br>0.0293 | 0.918,<br>-0.1214,<br>0.3421,<br>0.0282 | 0.887,<br>-0.0792,<br>0.3384,<br>0.0278 | 0.873,<br>-0.0381,<br>0.3338,<br>0.0274 | 0.868,<br>-0.0180,<br>0.3312,<br>0.0272 | 0.884,<br>0.0018,<br>0.3284,<br>0.027  | 0.887,<br>0.0404,<br>0.3224,<br>0.0266 | 0.900,<br>0.0776,<br>0.3158,<br>0.0262 | 0.923,<br>0.1648,<br>0.2985,<br>0.0253 |
| MR-RAPS4           | 1.000,<br>0.3571,<br>1.0738,<br>0.0253  | 0.999,<br>0.4107,<br>1.0289,<br>0.0235  | 0.971,<br>0.4326,<br>1.0006,<br>0.0227  | 0.932,<br>0.4616,<br>0.9527,<br>0.0217  | 0.931,<br>0.4855,<br>0.9528,<br>0.0219  | 0.928,<br>0.5026,<br>0.9786,<br>0.0226 | 0.974,<br>0.5353,<br>0.9597,<br>0.0221 | 0.994,<br>0.5806,<br>0.9693,<br>0.0225 | 1.000,<br>0.6787,<br>1.0068,<br>0.0237 |

Table S52: Main simulations: in each cell, from top to bottom are empirical type-I error/power, mean( $\hat{\theta}$ ), SD( $\hat{\theta}$ ), mean(SE( $\hat{\theta}$ )) when  $m = 20$ , the InSIDE satisfied,  $q = 0.2$ , and  $n = 200000$ .

| Methods \ $\theta$ | -0.1                                    | -0.05                                   | -0.03                                   | -0.01                                   | 0                                       | 0.01                                   | 0.03                                   | 0.05                                   | 0.1                                    |
|--------------------|-----------------------------------------|-----------------------------------------|-----------------------------------------|-----------------------------------------|-----------------------------------------|----------------------------------------|----------------------------------------|----------------------------------------|----------------------------------------|
| cML-MA-AIC         | 0.999,<br>-0.0951,<br>0.0124,<br>0.0119 | 0.929,<br>-0.0452,<br>0.0125,<br>0.0121 | 0.560,<br>-0.0255,<br>0.0122,<br>0.012  | 0.094,<br>-0.0079,<br>0.0108,<br>0.0117 | 0.034,<br>-0.0002,<br>0.0103,<br>0.0117 | 0.090,<br>0.0076,<br>0.0108,<br>0.0119 | 0.530,<br>0.0251,<br>0.0127,<br>0.0123 | 0.897,<br>0.0447,<br>0.0133,<br>0.0126 | 1.000,<br>0.0945,<br>0.0139,<br>0.013  |
| cML-MA-AIC-Profile | 0.999,<br>-0.0953,<br>0.0124,<br>0.0119 | 0.929,<br>-0.0452,<br>0.0126,<br>0.0121 | 0.558,<br>-0.0255,<br>0.0122,<br>0.012  | 0.094,<br>-0.0079,<br>0.0108,<br>0.0118 | 0.034,<br>-0.0002,<br>0.0103,<br>0.0117 | 0.089,<br>0.0076,<br>0.0108,<br>0.0119 | 0.530,<br>0.0251,<br>0.0127,<br>0.0124 | 0.897,<br>0.0448,<br>0.0134,<br>0.0127 | 1.000,<br>0.0946,<br>0.0139,<br>0.013  |
| cML-AIC            | 1.000,<br>-0.0979,<br>0.0132,<br>0.0099 | 0.962,<br>-0.0477,<br>0.0137,<br>0.0101 | 0.721,<br>-0.0278,<br>0.0136,<br>0.0102 | 0.211,<br>-0.0091,<br>0.0130,<br>0.0103 | 0.108,<br>-0.0004,<br>0.0129,<br>0.0104 | 0.206,<br>0.0085,<br>0.0130,<br>0.0104 | 0.702,<br>0.0275,<br>0.0139,<br>0.0105 | 0.949,<br>0.0473,<br>0.0142,<br>0.0106 | 1.000,<br>0.0973,<br>0.0145,<br>0.0109 |
| cML-AIC-Profile    | 1.000,<br>-0.0979,<br>0.0132,<br>0.01   | 0.962,<br>-0.0477,<br>0.0137,<br>0.0102 | 0.721,<br>-0.0278,<br>0.0137,<br>0.0102 | 0.211,<br>-0.0091,<br>0.0130,<br>0.0103 | 0.108,<br>-0.0004,<br>0.0129,<br>0.0104 | 0.205,<br>0.0085,<br>0.0130,<br>0.0104 | 0.702,<br>0.0275,<br>0.0139,<br>0.0105 | 0.949,<br>0.0474,<br>0.0142,<br>0.0106 | 1.000,<br>0.0974,<br>0.0146,<br>0.0109 |
| cML-MA-BIC         | 1.000,<br>-0.1000,<br>0.0091,<br>0.0092 | 1.000,<br>-0.0499,<br>0.0093,<br>0.0093 | 0.890,<br>-0.0299,<br>0.0094,<br>0.0094 | 0.179,<br>-0.0099,<br>0.0095,<br>0.0095 | 0.049,<br>0.0001,<br>0.0095,<br>0.0095  | 0.184,<br>0.0100,<br>0.0096,<br>0.0096 | 0.869,<br>0.0300,<br>0.0097,<br>0.0097 | 0.997,<br>0.0500,<br>0.0098,<br>0.0098 | 1.000,<br>0.1001,<br>0.0101,<br>0.0101 |
| cML-MA-BIC-Profile | 1.000,<br>-0.1000,<br>0.0091,<br>0.0092 | 1.000,<br>-0.0499,<br>0.0093,<br>0.0094 | 0.889,<br>-0.0299,<br>0.0094,<br>0.0094 | 0.177,<br>-0.0099,<br>0.0095,<br>0.0095 | 0.049,<br>0.0001,<br>0.0095,<br>0.0096  | 0.184,<br>0.0100,<br>0.0096,<br>0.0096 | 0.868,<br>0.0300,<br>0.0097,<br>0.0097 | 0.997,<br>0.0500,<br>0.0098,<br>0.0098 | 1.000,<br>0.1001,<br>0.0101,<br>0.0101 |
| cML-BIC            | 1.000,<br>-0.1000,<br>0.0091,<br>0.0091 | 1.000,<br>-0.0500,<br>0.0093,<br>0.0093 | 0.897,<br>-0.0299,<br>0.0094,<br>0.0093 | 0.181,<br>-0.0099,<br>0.0095,<br>0.0094 | 0.050,<br>0.0001,<br>0.0095,<br>0.0095  | 0.191,<br>0.0101,<br>0.0096,<br>0.0095 | 0.874,<br>0.0301,<br>0.0097,<br>0.0096 | 0.997,<br>0.0501,<br>0.0098,<br>0.0097 | 1.000,<br>0.1001,<br>0.0101,<br>0.01   |
| cML-BIC-Profile    | 1.000,<br>-0.1000,<br>0.0091,<br>0.0091 | 1.000,<br>-0.0500,<br>0.0093,<br>0.0093 | 0.897,<br>-0.0299,<br>0.0094,<br>0.0094 | 0.181,<br>-0.0099,<br>0.0095,<br>0.0094 | 0.050,<br>0.0001,<br>0.0095,<br>0.0095  | 0.190,<br>0.0101,<br>0.0096,<br>0.0095 | 0.874,<br>0.0301,<br>0.0097,<br>0.0096 | 0.997,<br>0.0501,<br>0.0098,<br>0.0097 | 1.000,<br>0.1001,<br>0.0101,<br>0.01   |
| MR-Mix             | 1.000,<br>-0.1062,<br>0.0126,<br>0.0162 | 0.933,<br>-0.0517,<br>0.0126,<br>0.0161 | 0.479,<br>-0.0307,<br>0.0124,<br>0.0161 | 0.052,<br>-0.0101,<br>0.0125,<br>0.0161 | 0.009,<br>0.0000,<br>0.0124,<br>0.0161  | 0.051,<br>0.0101,<br>0.0124,<br>0.0161 | 0.497,<br>0.0300,<br>0.0124,<br>0.0161 | 0.888,<br>0.0496,<br>0.0123,<br>0.0161 | 0.998,<br>0.0966,<br>0.0124,<br>0.0163 |
| MR-ContMix         | 1.000,<br>-0.0998,<br>0.0095,<br>NA     | 0.999,<br>-0.0498,<br>0.0096,<br>NA     | 0.892,<br>-0.0299,<br>0.0097,<br>NA     | 0.188,<br>-0.0099,<br>0.0097,<br>NA     | 0.065,<br>0.0001,<br>0.0098,<br>NA      | 0.196,<br>0.0100,<br>0.0098,<br>NA     | 0.861,<br>0.0300,<br>0.0100,<br>NA     | 0.998,<br>0.0500,<br>0.0101,<br>NA     | 1.000,<br>0.0999,<br>0.0104,<br>NA     |
| MR-Lasso           | 1.000,<br>-0.0998,<br>0.0094,<br>0.0096 | 0.999,<br>-0.0499,<br>0.0096,<br>0.0098 | 0.866,<br>-0.0299,<br>0.0097,<br>0.0099 | 0.173,<br>-0.0100,<br>0.0097,<br>0.01   | 0.048,<br>0.0000,<br>0.0098,<br>0.01    | 0.168,<br>0.0100,<br>0.0098,<br>0.0101 | 0.845,<br>0.0299,<br>0.0099,<br>0.0102 | 0.995,<br>0.0499,<br>0.0100,<br>0.0103 | 1.000,<br>0.0999,<br>0.0103,<br>0.0106 |
| MR-PRESSO          | 0.671,<br>-0.0931,<br>0.1512,<br>0.0583 | 0.599,<br>-0.0440,<br>0.1501,<br>0.0566 | 0.528,<br>-0.0243,<br>0.1496,<br>0.056  | 0.320,<br>-0.0049,<br>0.1491,<br>0.0555 | 0.268,<br>0.0042,<br>0.1484,<br>0.0546  | 0.305,<br>0.0139,<br>0.1479,<br>0.054  | 0.507,<br>0.0335,<br>0.1473,<br>0.053  | 0.608,<br>0.0531,<br>0.1465,<br>0.0522 | 0.726,<br>0.1037,<br>0.1439,<br>0.0492 |
| MR-IVW             | 0.087,<br>-0.0969,<br>0.1706,<br>0.1654 | 0.077,<br>-0.0468,<br>0.1706,<br>0.1654 | 0.084,<br>-0.0267,<br>0.1706,<br>0.1653 | 0.086,<br>-0.0067,<br>0.1706,<br>0.1653 | 0.087,<br>0.0034,<br>0.1706,<br>0.1653  | 0.087,<br>0.0134,<br>0.1706,<br>0.1653 | 0.087,<br>0.0334,<br>0.1705,<br>0.1653 | 0.090,<br>0.0535,<br>0.1705,<br>0.1653 | 0.110,<br>0.1036,<br>0.1705,<br>0.1653 |
| MR-IVW-Oracle      | 1.000,<br>-0.0998,<br>0.0091,<br>0.0097 | 0.999,<br>-0.0499,<br>0.0093,<br>0.0099 | 0.867,<br>-0.0299,<br>0.0094,<br>0.01   | 0.157,<br>-0.0099,<br>0.0095,<br>0.0101 | 0.043,<br>0.0001,<br>0.0095,<br>0.0101  | 0.157,<br>0.0101,<br>0.0096,<br>0.0102 | 0.847,<br>0.0300,<br>0.0097,<br>0.0103 | 0.996,<br>0.0500,<br>0.0098,<br>0.0104 | 1.000,<br>0.1000,<br>0.0101,<br>0.0107 |
| MR-Egger           | 0.077,<br>-0.0769,<br>0.9564,<br>0.8961 | 0.078,<br>-0.0286,<br>0.9563,<br>0.896  | 0.077,<br>-0.0093,<br>0.9562,<br>0.896  | 0.077,<br>0.0100,<br>0.9562,<br>0.896   | 0.076,<br>0.0197,<br>0.9561,<br>0.8959  | 0.075,<br>0.0294,<br>0.9561,<br>0.8959 | 0.075,<br>0.0487,<br>0.9561,<br>0.8959 | 0.072,<br>0.0680,<br>0.9560,<br>0.8959 | 0.077,<br>0.1163,<br>0.9559,<br>0.8958 |
| MR-Weighted-Median | 1.000,<br>-0.0992,<br>0.0114,<br>0.0127 | 0.981,<br>-0.0495,<br>0.0117,<br>0.013  | 0.634,<br>-0.0297,<br>0.0118,<br>0.0131 | 0.083,<br>-0.0099,<br>0.0118,<br>0.0132 | 0.027,<br>0.0000,<br>0.0119,<br>0.0132  | 0.087,<br>0.0099,<br>0.0119,<br>0.0133 | 0.625,<br>0.0298,<br>0.0120,<br>0.0134 | 0.964,<br>0.0496,<br>0.0122,<br>0.0136 | 1.000,<br>0.0992,<br>0.0126,<br>0.014  |
| MR-Weighted-Mode   | 1.000,<br>-0.0994,<br>0.0134,<br>0.0157 | 0.895,<br>-0.0495,<br>0.0137,<br>0.016  | 0.457,<br>-0.0297,<br>0.0138,<br>0.0161 | 0.060,<br>-0.0098,<br>0.0141,<br>0.0162 | 0.017,<br>0.0002,<br>0.0142,<br>0.0163  | 0.061,<br>0.0101,<br>0.0140,<br>0.0164 | 0.433,<br>0.0300,<br>0.0142,<br>0.0166 | 0.879,<br>0.0499,<br>0.0143,<br>0.0167 | 1.000,<br>0.0997,<br>0.0148,<br>0.0172 |
| MR-RAPS1           | 0.080,<br>-0.0973,<br>0.1657,<br>0.1607 | 0.076,<br>-0.0473,<br>0.1658,<br>0.1607 | 0.086,<br>-0.0273,<br>0.1658,<br>0.1607 | 0.097,<br>-0.0073,<br>0.1658,<br>0.1607 | 0.100,<br>0.0027,<br>0.1658,<br>0.1607  | 0.097,<br>0.0127,<br>0.1658,<br>0.1607 | 0.088,<br>0.0327,<br>0.1658,<br>0.1607 | 0.081,<br>0.0527,<br>0.1658,<br>0.1607 | 0.102,<br>0.1027,<br>0.1659,<br>0.1607 |
| MR-RAPS2           | 0.997,<br>0.4018,<br>2.9379,<br>0.0301  | 0.995,<br>0.4899,<br>2.6637,<br>0.0277  | 0.960,<br>0.5570,<br>3.2538,<br>0.0277  | 0.756,<br>0.4859,<br>3.1360,<br>0.0269  | 0.706,<br>0.4539,<br>2.3930,<br>0.0252  | 0.760,<br>0.5569,<br>5.9183,<br>0.0271 | 0.953,<br>0.4676,<br>2.5363,<br>0.0262 | 0.992,<br>0.5156,<br>2.6431,<br>0.025  | 0.995,<br>1.0016,<br>2.9849,<br>0.0319 |
| MR-RAPS3           | 0.970,<br>-0.2056,<br>0.3506,<br>0.0203 | 0.940,<br>-0.0977,<br>0.3434,<br>0.0198 | 0.917,<br>-0.0556,<br>0.3384,<br>0.0196 | 0.917,<br>-0.0144,<br>0.3297,<br>0.0191 | 0.910,<br>0.0057,<br>0.3297,<br>0.0191  | 0.898,<br>0.0254,<br>0.3267,<br>0.0189 | 0.907,<br>0.0637,<br>0.3204,<br>0.0186 | 0.921,<br>0.1004,<br>0.3137,<br>0.0183 | 0.952,<br>0.1861,<br>0.2963,<br>0.0177 |
| MR-RAPS4           | 1.000,<br>0.3556,<br>1.0514,<br>0.0168  | 1.000,<br>0.4648,<br>1.0059,<br>0.0162  | 0.995,<br>0.4820,<br>0.9893,<br>0.0169  | 0.965,<br>0.5276,<br>0.9934,<br>0.0168  | 0.953,<br>0.5601,<br>0.9828,<br>0.0163  | 0.962,<br>0.5651,<br>0.9625,<br>0.0156 | 0.993,<br>0.6407,<br>0.9894,<br>0.0163 | 1.000,<br>0.6812,<br>0.9645,<br>0.0161 | 1.000,<br>0.7718,<br>0.9746,<br>0.0166 |

Table S53: Main simulations: in each cell, from top to bottom are empirical type-I error/power, mean( $\hat{\theta}$ ), SD( $\hat{\theta}$ ), mean(SE( $\hat{\theta}$ )) when  $m = 20$ , the InSIDE satisfied,  $q = 0.4$ , and  $n = 50000$ .

| Methods \ $\theta$ | -0.1                                               | -0.05                                              | -0.03                                              | -0.01                                             | 0                                                 | 0.01                                              | 0.03                                              | 0.05                                             | 0.1                                      |
|--------------------|----------------------------------------------------|----------------------------------------------------|----------------------------------------------------|---------------------------------------------------|---------------------------------------------------|---------------------------------------------------|---------------------------------------------------|--------------------------------------------------|------------------------------------------|
| cML-MA-AIC         | 0.834,<br>-0.0882,<br>0.0294,<br>0.0286            | 0.317,<br>-0.0410,<br>0.0270,<br>0.0283            | 0.132,<br>-0.0241,<br>0.0254,<br>0.0279            | 0.033,<br>-0.0090,<br>0.0237,<br>0.0278           | 0.023,<br>-0.0017,<br>0.0234,<br>0.0279           | 0.029,<br>0.0058,<br>0.0235,<br>0.028             | 0.095,<br>0.0210,<br>0.0252,<br>0.0286            | 0.265,<br>0.0378,<br>0.0273,<br>0.0293           | 0.765,<br>0.0845,<br>0.0310,<br>0.0309   |
| cML-MA-AIC-Profile | 0.833,<br>-0.0884,<br>0.0295,<br>0.0288            | 0.311,<br>-0.0410,<br>0.0270,<br>0.0284            | 0.131,<br>-0.0241,<br>0.0254,<br>0.0281            | 0.033,<br>-0.0090,<br>0.0237,<br>0.028            | 0.021,<br>-0.0017,<br>0.0234,<br>0.028            | 0.030,<br>0.0058,<br>0.0235,<br>0.0281            | 0.095,<br>0.0210,<br>0.0252,<br>0.0287            | 0.263,<br>0.0378,<br>0.0274,<br>0.0294           | 0.762,<br>0.0847,<br>0.0311,<br>0.0311   |
| cML-AIC            | 0.929,<br>-0.0945,<br>0.0316,<br>0.0236            | 0.501,<br>-0.0460,<br>0.0308,<br>0.024             | 0.273,<br>-0.0274,<br>0.0303,<br>0.0242            | 0.121,<br>-0.0103,<br>0.0294,<br>0.0244           | 0.094,<br>-0.0017,<br>0.0294,<br>0.0245           | 0.101,<br>0.0072,<br>0.0292,<br>0.0246            | 0.224,<br>0.0239,<br>0.0308,<br>0.0248            | 0.437,<br>0.0422,<br>0.0317,<br>0.0251           | 0.879,<br>0.0909,<br>0.0336,<br>0.0258   |
| cML-AIC-Profile    | 0.925,<br>-0.0947,<br>0.0318,<br>0.0237            | 0.499,<br>-0.0460,<br>0.0309,<br>0.0241            | 0.269,<br>-0.0275,<br>0.0303,<br>0.0243            | 0.119,<br>-0.0103,<br>0.0294,<br>0.0245           | 0.093,<br>-0.0017,<br>0.0294,<br>0.0246           | 0.099,<br>0.0072,<br>0.0292,<br>0.0247            | 0.223,<br>0.0240,<br>0.0309,<br>0.025             | 0.432,<br>0.0423,<br>0.0317,<br>0.0252           | 0.875,<br>0.0910,<br>0.0337,<br>0.0259   |
| cML-MA-BIC         | 0.996,<br>-0.1007,<br>0.0220,<br>0.0219            | 0.631,<br>-0.0508,<br>0.0223,<br>0.0223            | 0.295,<br>-0.0308,<br>0.0224,<br>0.0225            | 0.061,<br>-0.0109,<br>0.0225,<br>0.0226           | 0.039,<br>-0.0010,<br>0.0226,<br>0.0227           | 0.068,<br>0.0090,<br>0.0227,<br>0.0229            | 0.246,<br>0.0289,<br>0.0229,<br>0.0231            | 0.549,<br>0.0488,<br>0.0233,<br>0.0233           | 0.982,<br>0.0987,<br>0.0238,<br>0.024    |
| cML-MA-BIC-Profile | 0.996,<br>-0.1007,<br>0.0220,<br>0.022             | 0.626,<br>-0.0508,<br>0.0223,<br>0.0224            | 0.294,<br>-0.0308,<br>0.0224,<br>0.0225            | 0.061,<br>-0.0109,<br>0.0226,<br>0.0227           | 0.039,<br>-0.0010,<br>0.0226,<br>0.0228           | 0.067,<br>0.0090,<br>0.0227,<br>0.0229            | 0.245,<br>0.0289,<br>0.0229,<br>0.0232            | 0.548,<br>0.0488,<br>0.0233,<br>0.0234           | 0.981,<br>0.0987,<br>0.0238,<br>0.0241   |
| cML-BIC            | 0.996,<br>-0.1009,<br>0.0219,<br>0.0216            | 0.640,<br>-0.0509,<br>0.0222,<br>0.022             | 0.308,<br>-0.0309,<br>0.0225,<br>0.0222            | 0.067,<br>-0.0109,<br>0.0226,<br>0.0224           | 0.043,<br>-0.0009,<br>0.0227,<br>0.0225           | 0.074,<br>0.0091,<br>0.0228,<br>0.0226            | 0.254,<br>0.0291,<br>0.0230,<br>0.0228            | 0.564,<br>0.0490,<br>0.0232,<br>0.023            | 0.985,<br>0.0990,<br>0.0238,<br>0.0237   |
| cML-BIC-Profile    | 0.996,<br>-0.1009,<br>0.0219,<br>0.0217            | 0.637,<br>-0.0509,<br>0.0222,<br>0.0221            | 0.306,<br>-0.0309,<br>0.0225,<br>0.0222            | 0.065,<br>-0.0109,<br>0.0226,<br>0.0224           | 0.044,<br>-0.0009,<br>0.0227,<br>0.0225           | 0.074,<br>0.0091,<br>0.0228,<br>0.0226            | 0.253,<br>0.0291,<br>0.0230,<br>0.0229            | 0.559,<br>0.0490,<br>0.0232,<br>0.0231           | 0.985,<br>0.0990,<br>0.0238,<br>0.0238   |
| MR-Mix             | 0.939,<br>-0.1039,<br>0.0246,<br>0.0978            | 0.389,<br>-0.0510,<br>0.0246,<br>0.0314            | 0.128,<br>-0.0304,<br>0.0245,<br>0.0313            | 0.020,<br>-0.0102,<br>0.0245,<br>0.031            | 0.016,<br>-0.0002,<br>0.0244,<br>0.031            | 0.027,<br>0.0096,<br>0.0244,<br>0.0309            | 0.120,<br>0.0291,<br>0.0244,<br>0.031             | 0.337,<br>0.0480,<br>0.0243,<br>0.0307           | 0.901,<br>0.0941,<br>0.0242,<br>0.0309   |
| MR-ContMix         | 0.993,<br>-0.1005,<br>0.0231,<br>NA                | 0.633,<br>-0.0509,<br>0.0234,<br>NA                | 0.308,<br>-0.0311,<br>0.0237,<br>NA                | 0.079,<br>-0.0113,<br>0.0240,<br>NA               | 0.059,<br>-0.0014,<br>0.0241,<br>NA               | 0.083,<br>0.0085,<br>0.0242,<br>NA                | 0.248,<br>0.0283,<br>0.0244,<br>NA                | 0.550,<br>0.0483,<br>0.0247,<br>NA               | 0.973,<br>0.0980,<br>0.0255,<br>NA       |
| MR-Lasso           | 0.983,<br>-0.1004,<br>0.0229,<br>0.023             | 0.597,<br>-0.0509,<br>0.0229,<br>0.0235            | 0.274,<br>-0.0312,<br>0.0231,<br>0.0237            | 0.065,<br>-0.0114,<br>0.0235,<br>0.0239           | 0.043,<br>-0.0014,<br>0.0235,<br>0.024            | 0.064,<br>0.0085,<br>0.0236,<br>0.0241            | 0.227,<br>0.0284,<br>0.0237,<br>0.0243            | 0.508,<br>0.0482,<br>0.0241,<br>0.0245           | 0.961,<br>0.0982,<br>0.0251,<br>0.0251   |
| MR-PRESSO          | 0.753,<br>-0.0916,<br>0.1689,<br>0.0485            | 0.488,<br>-0.0435,<br>0.1662,<br>0.0472            | 0.327,<br>-0.0255,<br>0.1652,<br>0.047             | 0.249,<br>-0.0068,<br>0.1635,<br>0.0462           | 0.235,<br>0.0032,<br>0.1626,<br>0.0459            | 0.254,<br>0.0127,<br>0.1632,<br>0.046             | 0.339,<br>0.0298,<br>0.1600,<br>0.045             | 0.478,<br>0.0479,<br>0.1584,<br>0.0445           | 0.762,<br>0.0967,<br>1.1530,<br>0.0431   |
| MR-IVW             | 0.089,<br>-0.0974,<br>0.2377,<br>0.2347            | 0.072,<br>-0.0473,<br>0.2376,<br>0.2347            | 0.073,<br>-0.0272,<br>0.2376,<br>0.2347            | 0.070,<br>-0.0072,<br>0.2376,<br>0.2347           | 0.068,<br>0.0028,<br>0.2376,<br>0.2347            | 0.065,<br>0.0128,<br>0.2376,<br>0.2347            | 0.064,<br>0.0328,<br>0.2375,<br>0.2347            | 0.068,<br>0.0528,<br>0.2375,<br>0.2347           | 0.079,<br>1.1028,<br>0.2375,<br>0.2347   |
| MR-IVW-Oracle      | 0.988,<br>-0.1003,<br>0.0217,<br>0.0232            | 0.592,<br>-0.0506,<br>0.0220,<br>0.0236            | 0.257,<br>-0.0307,<br>0.0221,<br>0.0238            | 0.044,<br>-0.0109,<br>0.0223,<br>0.024            | 0.029,<br>-0.0009,<br>0.0224,<br>0.0242           | 0.055,<br>0.0090,<br>0.0225,<br>0.0243            | 0.224,<br>0.0289,<br>0.0226,<br>0.0245            | 0.502,<br>0.0488,<br>0.0228,<br>0.0247           | 0.974,<br>0.0985,<br>0.0234,<br>0.0254   |
| MR-Egger           | 0.067,<br>-0.0648,<br>1.2200,<br>1.2197,<br>1.2119 | 0.064,<br>-0.0214,<br>1.2196,<br>1.2197,<br>1.2119 | 0.065,<br>-0.0041,<br>1.2196,<br>1.2195,<br>1.2119 | 0.065,<br>0.0133,<br>1.2195,<br>1.2195,<br>1.2119 | 0.066,<br>0.0219,<br>1.2195,<br>1.2195,<br>1.2119 | 0.067,<br>0.0306,<br>1.2194,<br>1.2193,<br>1.2119 | 0.067,<br>0.0480,<br>1.2193,<br>1.2192,<br>1.2119 | 0.067,<br>0.0653,<br>1.2192,<br>1.2192,<br>1.212 | 0.066,<br>1.1086,<br>1.2190,<br>1.212    |
| MR-Weighted-Median | 0.917,<br>-0.0976,<br>0.0270,<br>0.0296            | 0.388,<br>-0.0496,<br>0.0273,<br>0.0301            | 0.150,<br>-0.0305,<br>0.0275,<br>0.0303            | 0.034,<br>-0.0112,<br>0.0276,<br>0.0306           | 0.021,<br>-0.0016,<br>0.0277,<br>0.0307           | 0.033,<br>0.0080,<br>0.0278,<br>0.0309            | 0.121,<br>0.0273,<br>0.0282,<br>0.0312            | 0.306,<br>0.0465,<br>0.0285,<br>0.0315           | 0.846,<br>0.0943,<br>0.0291,<br>0.0324   |
| MR-Weighted-Mode   | 0.966,<br>-0.0991,<br>0.0244,<br>0.0265            | 0.474,<br>-0.0503,<br>0.0250,<br>0.027             | 0.191,<br>-0.0307,<br>0.0252,<br>0.0272            | 0.042,<br>-0.0113,<br>0.0253,<br>0.0275           | 0.030,<br>-0.0014,<br>0.0254,<br>0.0276           | 0.040,<br>0.0082,<br>0.0256,<br>0.0277            | 0.142,<br>0.0276,<br>0.0258,<br>0.028             | 0.388,<br>0.0473,<br>0.0261,<br>0.0283           | 0.919,<br>0.0959,<br>0.0267,<br>0.029    |
| MR-RAPS1           | 0.095,<br>-0.0993,<br>0.2340,<br>0.2292            | 0.076,<br>-0.0493,<br>0.2340,<br>0.2292            | 0.074,<br>-0.0293,<br>0.2340,<br>0.2292            | 0.070,<br>-0.0093,<br>0.2340,<br>0.2292           | 0.068,<br>0.0007,<br>0.2340,<br>0.2292            | 0.065,<br>0.0107,<br>0.2340,<br>0.2292            | 0.061,<br>0.0307,<br>0.2340,<br>0.2292            | 0.065,<br>0.0507,<br>0.2340,<br>0.2292           | 0.083,<br>0.1006,<br>0.2340,<br>0.2293   |
| MR-RAPS2           | 0.085,<br>-0.0999,<br>0.2354,<br>0.2385            | 0.063,<br>-0.0492,<br>0.2340,<br>0.2376            | 0.053,<br>-0.0285,<br>0.2317,<br>0.2369            | 0.053,<br>-0.0088,<br>0.2337,<br>0.237            | 0.056,<br>0.0006,<br>0.2326,<br>0.2372            | 0.051,<br>0.0116,<br>0.2334,<br>0.2378            | 0.055,<br>0.0300,<br>0.2340,<br>0.2379            | 0.054,<br>0.0509,<br>0.2337,<br>0.2379           | 0.072,<br>0.1014,<br>0.2348,<br>0.2387   |
| MR-RAPS3           | 0.888,<br>-2.9695,<br>58.2053,<br>314.389          | 0.895,<br>-0.7341,<br>19.9493,<br>42.8006          | 0.888,<br>1.5759,<br>57.7885,<br>294.0363          | 0.897,<br>-0.5554,<br>17.9349,<br>24.6186         | 0.896,<br>-0.4997,<br>12.1421,<br>14.5071         | 0.894,<br>-0.4092,<br>17.3224,<br>23.2788         | 0.887,<br>0.1299,<br>9.1446,<br>10.8243           | 0.884,<br>0.3781,<br>11.4410,<br>10.2028         | 0.894,<br>1.5471,<br>20.6127,<br>47.8447 |
| MR-RAPS4           | 0.992,<br>0.3520,<br>1.4681,<br>0.1099             | 0.993,<br>0.1808,<br>1.5481,<br>0.1598             | 0.987,<br>0.1103,<br>1.5868,<br>0.0659             | 0.982,<br>0.0891,<br>1.5686,<br>0.0626            | 0.970,<br>0.0791,<br>1.5665,<br>0.0632            | 0.977,<br>0.0371,<br>1.5944,<br>0.0764            | 0.978,<br>-0.1037,<br>1.6249,<br>0.1249           | 0.991,<br>-0.1298,<br>1.5901,<br>0.0654          | 1.000,<br>-0.3085,<br>1.5074,<br>0.0619  |

Table S54: Main simulations: in each cell, from top to bottom are empirical type-I error/power, mean( $\hat{\theta}$ ), SD( $\hat{\theta}$ ), mean(SE( $\hat{\theta}$ )) when  $m = 20$ , the InSIDE satisfied,  $q = 0.4$ , and  $n = 100000$ .

| Methods \ $\theta$ | -0.1                                      | -0.05                                    | -0.03                                   | -0.01                                    | 0                                       | 0.01                                     | 0.03                                     | 0.05                                    | 0.1                                      |
|--------------------|-------------------------------------------|------------------------------------------|-----------------------------------------|------------------------------------------|-----------------------------------------|------------------------------------------|------------------------------------------|-----------------------------------------|------------------------------------------|
| cML-MA-AIC         | 0.978,<br>-0.0906,<br>0.0201,<br>0.02     | 0.541,<br>-0.0413,<br>0.0197,<br>0.02    | 0.208,<br>-0.0229,<br>0.0183,<br>0.0197 | 0.042,<br>-0.0069,<br>0.0166,<br>0.0195  | 0.028,<br>0.0004,<br>0.0165,<br>0.0195  | 0.045,<br>0.0079,<br>0.0171,<br>0.0197   | 0.228,<br>0.0238,<br>0.0192,<br>0.0202   | 0.541,<br>0.0420,<br>0.0212,<br>0.0209  | 0.950,<br>0.0905,<br>0.0230,<br>0.0219   |
| cML-MA-AIC-Profile | 0.977,<br>-0.0908,<br>0.0202,<br>0.0201   | 0.538,<br>-0.0413,<br>0.0197,<br>0.0201  | 0.208,<br>-0.0229,<br>0.0183,<br>0.0198 | 0.041,<br>-0.0069,<br>0.0166,<br>0.0195  | 0.028,<br>0.0004,<br>0.0165,<br>0.0196  | 0.045,<br>0.0079,<br>0.0171,<br>0.0197   | 0.227,<br>0.0239,<br>0.0192,<br>0.0203   | 0.540,<br>0.0420,<br>0.0212,<br>0.0203  | 0.950,<br>0.0906,<br>0.0231,<br>0.0219   |
| cML-AIC            | 0.993,<br>-0.0954,<br>0.0216,<br>0.0164   | 0.730,<br>-0.0456,<br>0.0219,<br>0.0167  | 0.377,<br>-0.0262,<br>0.0213,<br>0.0169 | 0.113,<br>-0.0079,<br>0.0204,<br>0.017   | 0.096,<br>0.0003,<br>0.0204,<br>0.0171  | 0.134,<br>0.0089,<br>0.0210,<br>0.0172   | 0.384,<br>0.0266,<br>0.0222,<br>0.0174   | 0.699,<br>0.0461,<br>0.0233,<br>0.0176  | 0.980,<br>0.0954,<br>0.0243,<br>0.0181   |
| cML-AIC-Profile    | 0.993,<br>-0.0955,<br>0.0217,<br>0.0165   | 0.729,<br>-0.0457,<br>0.0220,<br>0.0168  | 0.377,<br>-0.0262,<br>0.0213,<br>0.0169 | 0.110,<br>-0.0079,<br>0.0204,<br>0.0171  | 0.096,<br>0.0003,<br>0.0204,<br>0.0172  | 0.133,<br>0.0089,<br>0.0210,<br>0.0173   | 0.384,<br>0.0266,<br>0.0222,<br>0.0174   | 0.699,<br>0.0462,<br>0.0233,<br>0.0176  | 0.980,<br>0.0955,<br>0.0244,<br>0.0181   |
| cML-MA-BIC         | 1.000,<br>-0.0996,<br>0.0149,<br>0.0153   | 0.887,<br>-0.0495,<br>0.0152,<br>0.0156  | 0.480,<br>-0.0295,<br>0.0153,<br>0.0157 | 0.083,<br>-0.0095,<br>0.0154,<br>0.0159  | 0.050,<br>0.0005,<br>0.0155,<br>0.0159  | 0.092,<br>0.0104,<br>0.0156,<br>0.016    | 0.471,<br>0.0304,<br>0.0158,<br>0.0162   | 0.877,<br>0.0504,<br>0.0160,<br>0.0163  | 1.000,<br>0.1005,<br>0.0164,<br>0.0168   |
| cML-MA-BIC-Profile | 1.000,<br>-0.0996,<br>0.0149,<br>0.0154   | 0.887,<br>-0.0495,<br>0.0152,<br>0.0156  | 0.479,<br>-0.0295,<br>0.0153,<br>0.0157 | 0.083,<br>-0.0095,<br>0.0154,<br>0.0159  | 0.049,<br>0.0005,<br>0.0155,<br>0.016   | 0.091,<br>0.0104,<br>0.0156,<br>0.016    | 0.469,<br>0.0304,<br>0.0158,<br>0.0162   | 0.877,<br>0.0504,<br>0.0160,<br>0.0164  | 1.000,<br>0.1005,<br>0.0164,<br>0.0168   |
| cML-BIC            | 1.000,<br>-0.0997,<br>0.0149,<br>0.0152   | 0.895,<br>-0.0496,<br>0.0152,<br>0.0154  | 0.487,<br>-0.0296,<br>0.0153,<br>0.0155 | 0.092,<br>-0.0096,<br>0.0154,<br>0.0157  | 0.055,<br>0.0004,<br>0.0155,<br>0.0157  | 0.094,<br>0.0104,<br>0.0156,<br>0.0158   | 0.482,<br>0.0304,<br>0.0157,<br>0.016    | 0.884,<br>0.0505,<br>0.0159,<br>0.0161  | 1.000,<br>0.1005,<br>0.0164,<br>0.0166   |
| cML-BIC-Profile    | 1.000,<br>-0.0997,<br>0.0149,<br>0.0152   | 0.895,<br>-0.0496,<br>0.0152,<br>0.0154  | 0.487,<br>-0.0296,<br>0.0153,<br>0.0156 | 0.091,<br>-0.0096,<br>0.0154,<br>0.0157  | 0.055,<br>0.0004,<br>0.0155,<br>0.0158  | 0.093,<br>0.0104,<br>0.0156,<br>0.0159   | 0.481,<br>0.0304,<br>0.0157,<br>0.016    | 0.884,<br>0.0505,<br>0.0159,<br>0.0162  | 1.000,<br>0.1005,<br>0.0164,<br>0.0166   |
| MR-Mix             | 0.993,<br>-0.1033,<br>0.0174,<br>0.0225   | 0.676,<br>-0.0506,<br>0.0174,<br>0.0223  | 0.244,<br>-0.0300,<br>0.0174,<br>0.0223 | 0.035,<br>-0.0097,<br>0.0174,<br>0.0223  | 0.017,<br>0.0003,<br>0.0175,<br>0.0223  | 0.034,<br>0.0102,<br>0.0175,<br>0.0223   | 0.244,<br>0.0297,<br>0.0175,<br>0.0223   | 0.644,<br>0.0488,<br>0.0175,<br>0.0222  | 0.988,<br>0.0952,<br>0.0176,<br>0.0223   |
| MR-ContMix         | 1.000,<br>-0.0993,<br>0.0157,<br>NA       | 0.883,<br>-0.0493,<br>0.0160,<br>NA      | 0.480,<br>-0.0294,<br>0.0162,<br>NA     | 0.102,<br>-0.0094,<br>0.0163,<br>NA      | 0.065,<br>0.0006,<br>0.0164,<br>NA      | 0.109,<br>0.0105,<br>0.0165,<br>NA       | 0.480,<br>0.0305,<br>0.0166,<br>NA       | 0.869,<br>0.0505,<br>0.0168,<br>NA      | 1.000,<br>0.1005,<br>0.0171,<br>NA       |
| MR-Lasso           | 0.999,<br>-0.0996,<br>0.0159,<br>0.0161   | 0.867,<br>-0.0494,<br>0.0159,<br>0.0164  | 0.432,<br>-0.0295,<br>0.0162,<br>0.0166 | 0.077,<br>-0.0096,<br>0.0163,<br>0.0167  | 0.047,<br>0.0004,<br>0.0162,<br>0.0168  | 0.089,<br>0.0103,<br>0.0163,<br>0.0169   | 0.431,<br>0.0303,<br>0.0164,<br>0.0171   | 0.840,<br>0.0500,<br>0.0167,<br>0.0172  | 0.999,<br>0.1001,<br>0.0170,<br>0.0177   |
| MR-PRESSO          | 0.669,<br>-0.1132,<br>0.2158,<br>0.0802   | 0.508,<br>-0.0636,<br>0.2152,<br>0.0796  | 0.369,<br>-0.0445,<br>0.2143,<br>0.0784 | 0.244,<br>-0.0249,<br>0.2137,<br>0.0774  | 0.225,<br>-0.0154,<br>0.2138,<br>0.0774 | 0.251,<br>-0.0056,<br>0.2135,<br>0.0771  | 0.366,<br>0.0145,<br>0.2132,<br>0.0768   | 0.512,<br>0.0331,<br>0.2119,<br>0.0755  | 0.671,<br>0.0827,<br>0.2105,<br>0.0738   |
| MR-IVW             | 0.115,<br>-0.1134,<br>0.2438,<br>0.2328   | 0.092,<br>-0.0631,<br>0.2438,<br>0.2328  | 0.084,<br>-0.0430,<br>0.2437,<br>0.2328 | 0.080,<br>-0.0229,<br>0.2437,<br>0.2328  | 0.076,<br>-0.0128,<br>0.2437,<br>0.2328 | 0.073,<br>-0.0028,<br>0.2437,<br>0.2328  | 0.077,<br>0.0173,<br>0.2437,<br>0.2328   | 0.076,<br>0.0374,<br>0.2437,<br>0.2328  | 0.091,<br>0.0876,<br>0.2437,<br>0.2327   |
| MR-IVW-Oracle      | 1.000,<br>-0.0994,<br>0.0171,<br>0.0163   | 0.873,<br>-0.0495,<br>0.0150,<br>0.0166  | 0.426,<br>-0.0295,<br>0.0151,<br>0.0167 | 0.065,<br>-0.0096,<br>0.0153,<br>0.0168  | 0.035,<br>0.0004,<br>0.0153,<br>0.0169  | 0.074,<br>0.0104,<br>0.0154,<br>0.017    | 0.429,<br>0.0304,<br>0.0156,<br>0.0172   | 0.840,<br>0.0503,<br>0.0157,<br>0.0173  | 1.000,<br>0.1003,<br>0.0162,<br>0.0178   |
| MR-Egger           | 0.075,<br>-0.1044,<br>1.2836,<br>1.2414   | 0.079,<br>-0.0576,<br>1.2832,<br>1.2413  | 0.081,<br>-0.0389,<br>1.2831,<br>1.2413 | 0.080,<br>-0.0203,<br>1.2829,<br>1.2413  | 0.080,<br>-0.0109,<br>1.2829,<br>1.2412 | 0.080,<br>-0.0016,<br>1.2828,<br>1.2412  | 0.079,<br>0.0171,<br>1.2826,<br>1.2412   | 0.080,<br>0.0357,<br>1.2825,<br>1.2412  | 0.082,<br>0.0824,<br>1.2822,<br>1.2411   |
| MR-Weighted-Median | 0.999,<br>-0.0976,<br>0.0189,<br>0.0208   | 0.668,<br>-0.0488,<br>0.0193,<br>0.0211  | 0.260,<br>-0.0292,<br>0.0194,<br>0.0213 | 0.057,<br>-0.0097,<br>0.0197,<br>0.0215  | 0.030,<br>0.0000,<br>0.0199,<br>0.0216  | 0.059,<br>0.0098,<br>0.0200,<br>0.0217   | 0.253,<br>0.0293,<br>0.0202,<br>0.0219   | 0.614,<br>0.0488,<br>0.0205,<br>0.0221  | 0.989,<br>0.0977,<br>0.0212,<br>0.0227   |
| MR-Weighted-Mode   | 1.000,<br>-0.0984,<br>0.0171,<br>0.0188   | 0.740,<br>-0.0487,<br>0.0176,<br>0.0191  | 0.315,<br>-0.0288,<br>0.0175,<br>0.0192 | 0.052,<br>-0.0091,<br>0.0176,<br>0.0194  | 0.037,<br>0.0008,<br>0.0177,<br>0.0195  | 0.063,<br>0.0105,<br>0.0178,<br>0.0195   | 0.339,<br>0.0303,<br>0.0179,<br>0.0198   | 0.728,<br>0.0503,<br>0.0181,<br>0.02    | 1.000,<br>0.0996,<br>0.0187,<br>0.0205   |
| MR-RAPS1           | 0.119,<br>-0.1123,<br>0.2371,<br>0.2272   | 0.086,<br>-0.0623,<br>0.2371,<br>0.2272  | 0.078,<br>-0.0423,<br>0.2371,<br>0.2272 | 0.075,<br>-0.0223,<br>0.2371,<br>0.2272  | 0.074,<br>-0.0123,<br>0.2371,<br>0.2272 | 0.073,<br>-0.0023,<br>0.2371,<br>0.2272  | 0.071,<br>0.0177,<br>0.2371,<br>0.2272   | 0.074,<br>0.0377,<br>0.2371,<br>0.2272  | 0.093,<br>0.0878,<br>0.2372,<br>0.2273   |
| MR-RAPS2           | 0.103,<br>-0.1130,<br>0.2373,<br>0.2359   | 0.073,<br>-0.0628,<br>0.2369,<br>0.2361  | 0.071,<br>-0.0433,<br>0.2370,<br>0.2363 | 0.067,<br>-0.0228,<br>0.2355,<br>0.2359  | 0.067,<br>-0.0131,<br>0.2373,<br>0.2364 | 0.066,<br>-0.0030,<br>0.2364,<br>0.2361  | 0.062,<br>0.0176,<br>0.2358,<br>0.2359   | 0.063,<br>0.0362,<br>0.2373,<br>0.2366  | 0.069,<br>0.0872,<br>0.2379,<br>0.2368   |
| MR-RAPS3           | 0.925,<br>-0.8929,<br>18.0217,<br>19.6811 | 0.932,<br>0.7958,<br>38.0980,<br>93.2854 | 0.922,<br>0.0503,<br>7.6305,<br>4.0117  | 0.920,<br>0.0199,<br>16.1430,<br>30.3805 | 0.917,<br>0.2883,<br>11.2263,<br>6.7844 | 0.914,<br>1.4861,<br>46.0627,<br>123.241 | 0.925,<br>0.1574,<br>11.9014,<br>21.7929 | 0.931,<br>0.7047,<br>11.9321,<br>9.4141 | 0.925,<br>0.8846,<br>16.3970,<br>13.1956 |
| MR-RAPS4           | 0.979,<br>0.8757,<br>1.5868,<br>0.1991    | 0.985,<br>0.6696,<br>1.6607,<br>0.2606   | 0.983,<br>0.5895,<br>1.6646,<br>0.0987  | 0.980,<br>0.4293,<br>1.7081,<br>0.0749   | 0.981,<br>0.3695,<br>1.7272,<br>0.105   | 0.983,<br>0.2996,<br>1.7692,<br>0.0683   | 0.985,<br>0.1714,<br>1.6743,<br>0.0583   | 0.999,<br>0.0820,<br>1.7151,<br>0.055   | 0.998,<br>-0.1306,<br>1.6148,<br>0.0519  |

Table S55: Main simulations: in each cell, from top to bottom are empirical type-I error/power, mean( $\hat{\theta}$ ), SD( $\hat{\theta}$ ), mean(SE( $\hat{\theta}$ )) when  $m = 20$ , the InSIDE satisfied,  $q = 0.4$ , and  $n = 200000$ .

| Methods \ $\theta$ | -0.1                                     | -0.05                                      | -0.03                                   | -0.01                                   | 0                                            | 0.01                                      | 0.03                                      | 0.05                                     | 0.1                                    |
|--------------------|------------------------------------------|--------------------------------------------|-----------------------------------------|-----------------------------------------|----------------------------------------------|-------------------------------------------|-------------------------------------------|------------------------------------------|----------------------------------------|
| cML-MA-AIC         | 1.000,<br>-0.0936,<br>0.0142,<br>0.0143  | 0.842,<br>-0.0437,<br>0.0142,<br>0.0145    | 0.412,<br>-0.0245,<br>0.0134,<br>0.0143 | 0.054,<br>-0.0074,<br>0.0117,<br>0.0139 | 0.022,<br>0.0002,<br>0.0115,<br>0.0139       | 0.057,<br>0.0077,<br>0.0121,<br>0.014     | 0.414,<br>0.0246,<br>0.0140,<br>0.0146    | 0.801,<br>0.0437,<br>0.0152,<br>0.0151   | 0.997,<br>0.0933,<br>0.0160,<br>0.0156 |
| cML-MA-AIC-Profile | 1.000,<br>-0.0937,<br>0.0142,<br>0.0143  | 0.841,<br>-0.0437,<br>0.0142,<br>0.0145    | 0.411,<br>-0.0245,<br>0.0134,<br>0.0143 | 0.054,<br>-0.0074,<br>0.0117,<br>0.0139 | 0.022,<br>0.0002,<br>0.0115,<br>0.0139       | 0.057,<br>0.0077,<br>0.0121,<br>0.014     | 0.412,<br>0.0246,<br>0.0140,<br>0.0146    | 0.801,<br>0.0437,<br>0.0152,<br>0.0151   | 0.997,<br>0.0934,<br>0.0160,<br>0.0156 |
| cML-AIC            | 1.000,<br>-0.0970,<br>0.0151,<br>0.0117  | 0.925,<br>-0.0471,<br>0.0153,<br>0.0119    | 0.612,<br>-0.0274,<br>0.0152,<br>0.012  | 0.152,<br>-0.0088,<br>0.0145,<br>0.0121 | 0.092,<br>0.0000,<br>0.0143,<br>0.0122       | 0.163,<br>0.0087,<br>0.0147,<br>0.0122    | 0.595,<br>0.0272,<br>0.0159,<br>0.0124    | 0.911,<br>0.0470,<br>0.0163,<br>0.0125   | 0.999,<br>0.0968,<br>0.0158,<br>0.0128 |
| cML-AIC-Profile    | 1.000,<br>-0.0970,<br>0.0151,<br>0.0118  | 0.925,<br>-0.0471,<br>0.0153,<br>0.0119    | 0.612,<br>-0.0274,<br>0.0152,<br>0.012  | 0.151,<br>-0.0088,<br>0.0145,<br>0.0122 | 0.092,<br>0.0000,<br>0.0143,<br>0.0122       | 0.161,<br>0.0087,<br>0.0147,<br>0.0123    | 0.596,<br>0.0272,<br>0.0159,<br>0.0124    | 0.911,<br>0.0470,<br>0.0163,<br>0.0125   | 0.999,<br>0.0969,<br>0.0169,<br>0.0129 |
| cML-MA-BIC         | 1.000,<br>-0.1001,<br>0.0109,<br>0.0109  | 0.991,<br>-0.0501,<br>0.0111,<br>0.0111    | 0.768,<br>-0.0301,<br>0.0111,<br>0.0112 | 0.139,<br>-0.0101,<br>0.0112,<br>0.0113 | 0.051,<br>-0.0001,<br>0.0112,<br>0.0113      | 0.142,<br>0.0099,<br>0.0113,<br>0.0114    | 0.741,<br>0.0298,<br>0.0114,<br>0.0115    | 0.986,<br>0.0498,<br>0.0115,<br>0.0116   | 1.000,<br>0.0998,<br>0.0118,<br>0.0119 |
| cML-MA-BIC-Profile | 1.000,<br>-0.1001,<br>0.0109,<br>0.0109  | 0.991,<br>-0.0501,<br>0.0111,<br>0.0111    | 0.767,<br>-0.0301,<br>0.0111,<br>0.0112 | 0.139,<br>-0.0101,<br>0.0112,<br>0.0113 | 0.051,<br>-0.0001,<br>0.0112,<br>0.0113      | 0.142,<br>0.0099,<br>0.0113,<br>0.0114    | 0.741,<br>0.0298,<br>0.0114,<br>0.0115    | 0.986,<br>0.0498,<br>0.0115,<br>0.0116   | 1.000,<br>0.0998,<br>0.0118,<br>0.0119 |
| cML-BIC            | 1.000,<br>-0.1001,<br>0.0109,<br>0.0108  | 0.992,<br>-0.0501,<br>0.0111,<br>0.011     | 0.771,<br>-0.0301,<br>0.0111,<br>0.0111 | 0.146,<br>-0.0101,<br>0.0112,<br>0.0111 | 0.055,<br>-0.0001,<br>0.0113,<br>0.0112      | 0.150,<br>0.0099,<br>0.0113,<br>0.0113    | 0.748,<br>0.0299,<br>0.0114,<br>0.0114    | 0.989,<br>0.0499,<br>0.0115,<br>0.0115   | 1.000,<br>0.0998,<br>0.0118,<br>0.0118 |
| cML-BIC-Profile    | 1.000,<br>-0.1001,<br>0.0109,<br>0.0108  | 0.992,<br>-0.0501,<br>0.0111,<br>0.011     | 0.769,<br>-0.0301,<br>0.0111,<br>0.0111 | 0.145,<br>-0.0101,<br>0.0112,<br>0.0112 | 0.055,<br>-0.0001,<br>0.0113,<br>0.0112      | 0.150,<br>0.0099,<br>0.0113,<br>0.0113    | 0.746,<br>0.0299,<br>0.0114,<br>0.0114    | 0.989,<br>0.0499,<br>0.0115,<br>0.0115   | 1.000,<br>0.0998,<br>0.0118,<br>0.0118 |
| MR-Mix             | 0.999,<br>-0.1041,<br>0.0136,<br>0.0164  | 0.901,<br>-0.0510,<br>0.0135,<br>0.0165    | 0.473,<br>-0.0305,<br>0.0135,<br>0.0164 | 0.072,<br>-0.0104,<br>0.0134,<br>0.0163 | 0.021,<br>-0.0005,<br>0.0134,<br>0.0163      | 0.058,<br>0.0095,<br>0.0134,<br>0.0163    | 0.442,<br>0.0290,<br>0.0134,<br>0.0163    | 0.875,<br>0.0483,<br>0.0134,<br>0.0163   | 0.997,<br>0.0945,<br>0.0133,<br>0.0166 |
| MR-ContMix         | 1.000,<br>-0.0999,<br>0.0113,<br>NA      | 0.990,<br>-0.0500,<br>0.0114,<br>NA        | 0.776,<br>-0.0301,<br>0.0115,<br>NA     | 0.160,<br>-0.0101,<br>0.0116,<br>NA     | 0.069,<br>-0.0001,<br>0.0116,<br>NA          | 0.166,<br>0.0099,<br>0.0117,<br>NA        | 0.757,<br>0.0298,<br>0.0118,<br>NA        | 0.985,<br>0.0498,<br>0.0119,<br>NA       | 1.000,<br>0.0997,<br>0.0123,<br>NA     |
| MR-Lasso           | 1.000,<br>-0.0999,<br>0.0112,<br>0.0114  | 0.986,<br>-0.0500,<br>0.0114,<br>0.0117    | 0.732,<br>-0.0300,<br>0.0115,<br>0.0117 | 0.127,<br>-0.0101,<br>0.0115,<br>0.0119 | 0.050,<br>-0.0001,<br>0.0115,<br>0.0119      | 0.127,<br>0.0099,<br>0.0115,<br>0.012     | 0.695,<br>0.0298,<br>0.0117,<br>0.0121    | 0.978,<br>0.0497,<br>0.0119,<br>0.0122   | 1.000,<br>0.0997,<br>0.0121,<br>0.0126 |
| MR-PRESSO          | 0.530,<br>-0.1029,<br>0.2321,<br>0.1158  | 0.449,<br>-0.0532,<br>0.2317,<br>0.1145    | 0.364,<br>-0.0330,<br>0.2312,<br>0.1129 | 0.214,<br>-0.0131,<br>0.2309,<br>0.1122 | 0.187,<br>-0.0031,<br>0.2309,<br>0.1118      | 0.206,<br>0.0064,<br>0.2306,<br>0.1109    | 0.373,<br>0.0260,<br>0.2305,<br>0.1108    | 0.476,<br>0.0462,<br>0.2299,<br>0.1094   | 0.560,<br>0.0944,<br>0.2287,<br>0.1068 |
| MR-IVW             | 0.097,<br>-0.1017,<br>0.2428,<br>0.2339  | 0.073,<br>-0.0513,<br>0.2427,<br>0.2339    | 0.067,<br>-0.0312,<br>0.2427,<br>0.2339 | 0.068,<br>-0.0111,<br>0.2427,<br>0.2339 | 0.069,<br>-0.0010,<br>0.2427,<br>0.2339      | 0.073,<br>0.0090,<br>0.2427,<br>0.2339    | 0.071,<br>0.0292,<br>0.2427,<br>0.2338    | 0.073,<br>0.0493,<br>0.2426,<br>0.2338   | 0.084,<br>0.0995,<br>0.2426,<br>0.2338 |
| MR-IVW-Oracle      | 1.000,<br>-0.1000,<br>0.0108,<br>0.0115  | 0.989,<br>-0.0501,<br>0.0109,<br>0.0118    | 0.728,<br>-0.0301,<br>0.0110,<br>0.0119 | 0.119,<br>-0.0101,<br>0.0111,<br>0.012  | 0.043,<br>-0.0001,<br>0.0111,<br>0.012       | 0.119,<br>0.0099,<br>0.0112,<br>0.0121    | 0.695,<br>0.0298,<br>0.0113,<br>0.0122    | 0.983,<br>0.0498,<br>0.0114,<br>0.0123   | 1.000,<br>0.0997,<br>0.0117,<br>0.0127 |
| MR-Egger           | 0.072,<br>-0.0795,<br>1.2766,<br>1.257   | 0.070,<br>-0.0310,<br>1.2764,<br>1.2569    | 0.069,<br>-0.0116,<br>1.2763,<br>1.2568 | 0.071,<br>0.0077,<br>1.2762,<br>1.2568  | 0.069,<br>0.0174,<br>1.2762,<br>1.2567       | 0.069,<br>0.0174,<br>1.2761,<br>1.2567    | 0.067,<br>0.0465,<br>1.2760,<br>1.2567    | 0.067,<br>0.0658,<br>1.2760,<br>1.2566   | 0.070,<br>0.1142,<br>1.2758,<br>1.2565 |
| MR-Weighted-Median | 1.000,<br>-0.0989,<br>0.0135,<br>0.0148  | 0.924,<br>-0.0496,<br>0.0138,<br>0.015     | 0.518,<br>-0.0298,<br>0.0140,<br>0.0151 | 0.072,<br>-0.0101,<br>0.0141,<br>0.0153 | 0.032,<br>-0.0003,<br>0.0141,<br>0.0153      | 0.068,<br>0.0096,<br>0.0142,<br>0.0154    | 0.470,<br>0.0294,<br>0.0143,<br>0.0155    | 0.901,<br>0.0492,<br>0.0144,<br>0.0157   | 1.000,<br>0.0985,<br>0.0149,<br>0.0161 |
| MR-Weighted-Mode   | 1.000,<br>-0.0995,<br>0.0124,<br>0.0135  | 0.963,<br>-0.0498,<br>0.0125,<br>0.0137    | 0.598,<br>-0.0299,<br>0.0125,<br>0.0138 | 0.094,<br>-0.0101,<br>0.0128,<br>0.0139 | 0.028,<br>-0.0002,<br>0.0128,<br>0.014       | 0.090,<br>0.0098,<br>0.0129,<br>0.014     | 0.547,<br>0.0297,<br>0.0130,<br>0.0142    | 0.948,<br>0.0497,<br>0.0133,<br>0.0143   | 1.000,<br>0.0993,<br>0.0135,<br>0.0147 |
| MR-RAPS1           | 0.111,<br>-0.1027,<br>0.2379,<br>0.2278  | 0.077,<br>-0.0527,<br>0.2379,<br>0.2278    | 0.072,<br>-0.0327,<br>0.2379,<br>0.2279 | 0.068,<br>-0.0127,<br>0.2380,<br>0.2279 | 0.068,<br>-0.0027,<br>0.2380,<br>0.2279      | 0.066,<br>0.0073,<br>0.2380,<br>0.2279    | 0.063,<br>0.0273,<br>0.2380,<br>0.2279    | 0.067,<br>0.0473,<br>0.2380,<br>0.2279   | 0.098,<br>0.0973,<br>0.2380,<br>0.2279 |
| MR-RAPS2           | 0.184,<br>-0.1014,<br>0.1316,<br>0.1226  | 0.062,<br>-0.0525,<br>0.1360,<br>0.1264    | 0.035,<br>-0.0310,<br>0.1417,<br>0.1305 | 0.027,<br>-0.0124,<br>0.1515,<br>0.134  | 0.029,<br>-0.0025,<br>0.1554,<br>0.1346      | 0.034,<br>0.0080,<br>0.1578,<br>0.136     | 0.047,<br>0.0281,<br>0.1553,<br>0.1351    | 0.063,<br>0.0482,<br>0.1489,<br>0.1301   | 0.185,<br>0.0992,<br>0.1609,<br>0.141  |
| MR-RAPS3           | 0.955,<br>-0.4771,<br>12.4874,<br>5.8058 | 0.943,<br>-3.2576,<br>82.3207,<br>686.8739 | 0.953,<br>-0.2303,<br>8.2856,<br>3.4314 | 0.941,<br>0.1716,<br>11.3534,<br>6.0882 | 0.939,<br>-9.5439,<br>229.1913,<br>1847.4207 | 0.947,<br>-0.7703,<br>19.8328,<br>26.7187 | 0.951,<br>-0.3191,<br>17.9694,<br>13.7273 | 0.951,<br>0.2955,<br>24.1995,<br>30.1402 | 0.950,<br>0.4838,<br>6.9566,<br>3.6628 |
| MR-RAPS4           | 0.982,<br>1.1288,<br>1.6298,<br>0.1778   | 0.985,<br>0.9179,<br>1.7130,<br>0.1424     | 0.986,<br>0.8707,<br>1.7081,<br>0.106   | 0.978,<br>0.7828,<br>1.7112,<br>0.1156  | 0.984,<br>0.7917,<br>1.7037,<br>0.0817       | 0.987,<br>0.6884,<br>1.7087,<br>0.0722    | 0.996,<br>0.6199,<br>1.7184,<br>0.0566    | 0.998,<br>0.5362,<br>1.7694,<br>0.0456   | 1.000,<br>0.2991,<br>1.6853,<br>0.0349 |



Table S57: Main simulations: in each cell, from top to bottom are empirical type-I error/power, mean( $\hat{\theta}$ ), SD( $\hat{\theta}$ ), mean(SE( $\hat{\theta}$ )) when  $m = 20$ , the InSIDE satisfied,  $q = 0.6$ , and  $n = 100000$ .

| Methods \ $\theta$ | -0.1                                       | -0.05                                       | -0.03                                      | -0.01                                     | 0                                            | 0.01                                      | 0.03                                          | 0.05                                    | 0.1                                         |
|--------------------|--------------------------------------------|---------------------------------------------|--------------------------------------------|-------------------------------------------|----------------------------------------------|-------------------------------------------|-----------------------------------------------|-----------------------------------------|---------------------------------------------|
| cML-MA-AIC         | 0.888,<br>-0.0874,<br>0.0242,<br>0.0262    | 0.330,<br>-0.0390,<br>0.0227,<br>0.0259     | 0.102,<br>-0.0221,<br>0.0204,<br>0.0253    | 0.030,<br>-0.0076,<br>0.0188,<br>0.025    | 0.015,<br>-0.0009,<br>0.0186,<br>0.025       | 0.022,<br>0.0062,<br>0.0191,<br>0.0252    | 0.108,<br>0.0211,<br>0.0214,<br>0.0259        | 0.295,<br>0.0381,<br>0.0238,<br>0.0267  | 0.853,<br>0.0858,<br>0.0269,<br>0.0281      |
| cML-MA-AIC-Profile | 0.888,<br>-0.0875,<br>0.0243,<br>0.0263    | 0.328,<br>-0.0390,<br>0.0227,<br>0.0259     | 0.101,<br>-0.0221,<br>0.0204,<br>0.0254    | 0.030,<br>-0.0076,<br>0.0188,<br>0.0251   | 0.015,<br>-0.0009,<br>0.0186,<br>0.0251      | 0.022,<br>0.0062,<br>0.0191,<br>0.0253    | 0.108,<br>0.0211,<br>0.0214,<br>0.0259        | 0.293,<br>0.0381,<br>0.0238,<br>0.0268  | 0.853,<br>0.0859,<br>0.0269,<br>0.0282      |
| cML-AIC            | 0.941,<br>-0.0932,<br>0.0271,<br>0.0209    | 0.567,<br>-0.0441,<br>0.0269,<br>0.0212     | 0.273,<br>-0.0257,<br>0.0252,<br>0.0213    | 0.097,<br>-0.0092,<br>0.0244,<br>0.0215   | 0.084,<br>-0.0009,<br>0.0240,<br>0.0216      | 0.094,<br>0.0074,<br>0.0244,<br>0.0217    | 0.252,<br>0.0243,<br>0.0264,<br>0.0219        | 0.539,<br>0.0428,<br>0.0279,<br>0.0221  | 0.927,<br>0.0922,<br>0.0296,<br>0.0227      |
| cML-AIC-Profile    | 0.943,<br>-0.0935,<br>0.0272,<br>0.0209    | 0.567,<br>-0.0441,<br>0.0269,<br>0.0213     | 0.270,<br>-0.0257,<br>0.0252,<br>0.0214    | 0.096,<br>-0.0092,<br>0.0244,<br>0.0216   | 0.083,<br>-0.0009,<br>0.0240,<br>0.0217      | 0.094,<br>0.0074,<br>0.0245,<br>0.0217    | 0.249,<br>0.0242,<br>0.0264,<br>0.022         | 0.534,<br>0.0429,<br>0.0279,<br>0.0222  | 0.927,<br>0.0922,<br>0.0296,<br>0.0228      |
| cML-MA-BIC         | 0.998,<br>-0.1000,<br>0.0192,<br>0.0193    | 0.718,<br>-0.0500,<br>0.0195,<br>0.0196     | 0.322,<br>-0.0300,<br>0.0196,<br>0.0197    | 0.078,<br>-0.0100,<br>0.0198,<br>0.0199   | 0.052,<br>0.0000,<br>0.0199,<br>0.02         | 0.071,<br>0.0099,<br>0.0200,<br>0.0201    | 0.320,<br>0.0299,<br>0.0203,<br>0.0203        | 0.699,<br>0.0499,<br>0.0205,<br>0.0205  | 0.993,<br>0.0999,<br>0.0211,<br>0.0211      |
| cML-MA-BIC-Profile | 0.998,<br>-0.1000,<br>0.0192,<br>0.0193    | 0.717,<br>-0.0500,<br>0.0195,<br>0.0196     | 0.322,<br>-0.0300,<br>0.0196,<br>0.0198    | 0.078,<br>-0.0100,<br>0.0198,<br>0.02     | 0.051,<br>0.0000,<br>0.0199,<br>0.02         | 0.071,<br>0.0099,<br>0.0200,<br>0.0201    | 0.319,<br>0.0299,<br>0.0203,<br>0.0203        | 0.697,<br>0.0499,<br>0.0205,<br>0.0205  | 0.993,<br>0.0999,<br>0.0211,<br>0.0211      |
| cML-BIC            | 0.998,<br>-0.1000,<br>0.0192,<br>0.0191    | 0.723,<br>-0.0500,<br>0.0195,<br>0.0194     | 0.328,<br>-0.0300,<br>0.0197,<br>0.0195    | 0.083,<br>-0.0100,<br>0.0199,<br>0.0197   | 0.057,<br>0.0000,<br>0.0200,<br>0.0198       | 0.074,<br>0.0100,<br>0.0201,<br>0.0199    | 0.333,<br>0.0300,<br>0.0203,<br>0.02          | 0.711,<br>0.0500,<br>0.0205,<br>0.0203  | 0.993,<br>0.1001,<br>0.0212,<br>0.0208      |
| cML-BIC-Profile    | 0.998,<br>-0.1000,<br>0.0192,<br>0.0191    | 0.723,<br>-0.0500,<br>0.0195,<br>0.0194     | 0.327,<br>-0.0300,<br>0.0197,<br>0.0196    | 0.083,<br>-0.0100,<br>0.0199,<br>0.0197   | 0.055,<br>0.0000,<br>0.0200,<br>0.0198       | 0.074,<br>0.0100,<br>0.0201,<br>0.0199    | 0.332,<br>0.0300,<br>0.0203,<br>0.0201        | 0.709,<br>0.0500,<br>0.0205,<br>0.0203  | 0.993,<br>0.1001,<br>0.0212,<br>0.0208      |
| MR-Mix             | 0.976,<br>-0.1017,<br>0.0210,<br>0.0245    | 0.562,<br>-0.0499,<br>0.0209,<br>0.0243     | 0.224,<br>-0.0298,<br>0.0209,<br>0.0242    | 0.051,<br>-0.0099,<br>0.0209,<br>0.0243   | 0.030,<br>-0.0001,<br>0.0208,<br>0.0243      | 0.040,<br>0.0097,<br>0.0209,<br>0.0244    | 0.212,<br>0.0288,<br>0.0209,<br>0.0243        | 0.554,<br>0.0476,<br>0.0208,<br>0.0243  | 0.970,<br>0.0932,<br>0.0209,<br>0.024       |
| MR-ContMix         | 0.998,<br>-0.1000,<br>0.0198,<br>NA        | 0.740,<br>-0.0501,<br>0.0201,<br>NA         | 0.367,<br>-0.0301,<br>0.0203,<br>NA        | 0.098,<br>-0.0102,<br>0.0205,<br>NA       | 0.070,<br>-0.0002,<br>0.0206,<br>NA          | 0.091,<br>0.0098,<br>0.0206,<br>NA        | 0.356,<br>0.0298,<br>0.0209,<br>NA            | 0.726,<br>0.0498,<br>0.0212,<br>NA      | 0.994,<br>0.0997,<br>0.0217,<br>NA          |
| MR-Lasso           | 0.984,<br>-0.1014,<br>0.1710,<br>0.0261    | 0.662,<br>-0.0515,<br>0.1705,<br>0.0264     | 0.295,<br>-0.0314,<br>0.1705,<br>0.0266    | 0.098,<br>-0.0114,<br>0.1705,<br>0.0268   | 0.073,<br>-0.0012,<br>0.1716,<br>0.0269      | 0.089,<br>0.0086,<br>0.1724,<br>0.0271    | 0.302,<br>0.0284,<br>0.1735,<br>0.0272        | 0.638,<br>0.0485,<br>0.1731,<br>0.0273  | 0.974,<br>0.0990,<br>0.1679,<br>0.0278      |
| MR-PRESSO          | 0.528,<br>-0.1065,<br>0.2693,<br>0.1301    | 0.349,<br>-0.0569,<br>0.2691,<br>0.129      | 0.229,<br>-0.0375,<br>0.2690,<br>0.1288    | 0.159,<br>-0.0179,<br>0.2685,<br>0.1277   | 0.143,<br>-0.0078,<br>0.2685,<br>0.1277      | 0.152,<br>0.0019,<br>0.2684,<br>0.1272    | 0.229,<br>0.0209,<br>0.2674,<br>0.1263        | 0.350,<br>0.0406,<br>0.2674,<br>0.1248  | 0.524,<br>0.0907,<br>0.2659,<br>0.1215      |
| MR-IVW             | 0.082,<br>-0.1106,<br>0.2861,<br>0.2863    | 0.074,<br>-0.0601,<br>0.2861,<br>0.2863     | 0.066,<br>-0.0399,<br>0.2861,<br>0.2863    | 0.066,<br>-0.0198,<br>0.2861,<br>0.2863   | 0.067,<br>-0.0097,<br>0.2861,<br>0.2863      | 0.065,<br>0.0004,<br>0.2861,<br>0.2863    | 0.067,<br>0.0205,<br>0.2861,<br>0.2863        | 0.071,<br>0.0407,<br>0.2861,<br>0.2863  | 0.074,<br>0.0910,<br>0.2860,<br>0.2863      |
| MR-IVW-Oracle      | 0.997,<br>-0.0998,<br>0.0191,<br>0.0207    | 0.664,<br>-0.0499,<br>0.0195,<br>0.0211     | 0.278,<br>-0.0299,<br>0.0196,<br>0.0213    | 0.067,<br>-0.0100,<br>0.0198,<br>0.0215   | 0.044,<br>0.0000,<br>0.0199,<br>0.0216       | 0.055,<br>0.0100,<br>0.0200,<br>0.0217    | 0.281,<br>0.0299,<br>0.0202,<br>0.0219        | 0.638,<br>0.0499,<br>0.0205,<br>0.0221  | 0.990,<br>0.0998,<br>0.0211,<br>0.0227      |
| MR-Egger           | 0.095,<br>-0.1206,<br>1.6542,<br>1.5192    | 0.097,<br>-0.0738,<br>1.6538,<br>1.5191     | 0.099,<br>-0.0550,<br>1.6537,<br>1.5191    | 0.099,<br>-0.0363,<br>1.6535,<br>1.5191   | 0.099,<br>-0.0270,<br>1.6535,<br>1.5191      | 0.100,<br>-0.0176,<br>1.6534,<br>1.5191   | 0.099,<br>0.0011,<br>1.6534,<br>1.5191        | 0.098,<br>0.0198,<br>1.6532,<br>1.5191  | 0.095,<br>0.0665,<br>1.6529,<br>1.5191      |
| MR-Weighted-Median | 0.960,<br>-0.0974,<br>0.0253,<br>0.0254    | 0.485,<br>-0.0488,<br>0.0258,<br>0.0258     | 0.201,<br>-0.0294,<br>0.0261,<br>0.026     | 0.075,<br>-0.0101,<br>0.0266,<br>0.0262   | 0.054,<br>-0.0006,<br>0.0268,<br>0.0263      | 0.067,<br>0.0091,<br>0.0270,<br>0.0264    | 0.193,<br>0.0284,<br>0.0275,<br>0.0266        | 0.442,<br>0.0476,<br>0.0281,<br>0.0269  | 0.919,<br>0.0955,<br>0.0295,<br>0.0276      |
| MR-Weighted-Mode   | 0.840,<br>-0.0914,<br>0.0476,<br>0.0236    | 0.521,<br>-0.0462,<br>0.0482,<br>0.0241     | 0.395,<br>-0.0282,<br>0.0488,<br>0.0243    | 0.300,<br>-0.0100,<br>0.0494,<br>0.0245   | 0.313,<br>-0.0009,<br>0.0496,<br>0.0247      | 0.317,<br>0.0082,<br>0.0498,<br>0.0248    | 0.392,<br>0.0264,<br>0.0508,<br>0.0251        | 0.516,<br>0.0446,<br>0.0518,<br>0.0254  | 0.796,<br>0.0896,<br>0.0542,<br>0.0264      |
| MR-RAPS1           | 0.083,<br>-0.1084,<br>0.2792,<br>0.2796    | 0.076,<br>-0.0583,<br>0.2792,<br>0.2796     | 0.070,<br>-0.0383,<br>0.2792,<br>0.2796    | 0.065,<br>-0.0183,<br>0.2793,<br>0.2796   | 0.063,<br>-0.0083,<br>0.2793,<br>0.2796      | 0.064,<br>0.0017,<br>0.2793,<br>0.2796    | 0.069,<br>0.0217,<br>0.2793,<br>0.2796        | 0.071,<br>0.0417,<br>0.2793,<br>0.2796  | 0.079,<br>0.0917,<br>0.2793,<br>0.2797      |
| MR-RAPS2           | 0.098,<br>-0.1111,<br>0.3274,<br>0.3027    | 0.080,<br>-0.0585,<br>0.3159,<br>0.3038     | 0.080,<br>-0.0395,<br>0.3162,<br>0.304     | 0.080,<br>-0.0215,<br>0.3202,<br>0.3033   | 0.083,<br>-0.0096,<br>0.3236,<br>0.3035      | 0.087,<br>-0.0062,<br>0.3322,<br>0.3023   | 0.080,<br>0.0205,<br>0.3171,<br>0.304         | 0.084,<br>0.0349,<br>0.3305,<br>0.3024  | 0.094,<br>0.0917,<br>0.3196,<br>0.3036      |
| MR-RAPS3           | 0.906,<br>-2.7927,<br>89.2482,<br>172.8403 | 0.920,<br>8.5127,<br>256.4422,<br>1436.1815 | 0.915,<br>5.1277,<br>111.1046,<br>317.4877 | 0.911,<br>-2.1372,<br>63.7077,<br>88.3011 | 0.917,<br>14.4961,<br>301.0921,<br>2142.2384 | 0.920,<br>-0.8176,<br>32.4694,<br>26.1085 | 0.928,<br>-16.2561,<br>487.8015,<br>8034.2503 | 0.932,<br>1.2652,<br>18.5049,<br>9.8629 | 0.926,<br>-3.7158,<br>103.9734,<br>262.3552 |
| MR-RAPS4           | 0.992,<br>0.6529,<br>1.6028,<br>0.1007     | 0.996,<br>0.4470,<br>1.7693,<br>0.1051      | 0.995,<br>0.3015,<br>1.7968,<br>0.1154     | 0.995,<br>0.2050,<br>1.7899,<br>0.1383    | 0.992,<br>0.1195,<br>1.8489,<br>0.0914       | 0.992,<br>0.0096,<br>1.8731,<br>0.096     | 0.985,<br>-0.2416,<br>1.9026,<br>0.3056       | 0.984,<br>-0.3876,<br>1.9715,<br>0.1785 | 0.986,<br>-0.7337,<br>1.7963,<br>0.143      |

Table S58: Main simulations: in each cell, from top to bottom are empirical type-I error/power, mean( $\hat{\theta}$ ), SD( $\hat{\theta}$ ), mean(SE( $\hat{\theta}$ )) when  $m = 20$ , the InSIDE satisfied,  $q = 0.6$ , and  $n = 200000$ .

| Methods \ $\theta$ | -0.1                                        | -0.05                                      | -0.03                                        | -0.01                                        | 0                                        | 0.01                                        | 0.03                                      | 0.05                                      | 0.1                                      |
|--------------------|---------------------------------------------|--------------------------------------------|----------------------------------------------|----------------------------------------------|------------------------------------------|---------------------------------------------|-------------------------------------------|-------------------------------------------|------------------------------------------|
| cML-MA-AIC         | 0.987,<br>-0.0908,<br>0.0174,<br>0.0183     | 0.631,<br>-0.0411,<br>0.0170,<br>0.0183    | 0.241,<br>-0.0227,<br>0.0156,<br>0.018       | 0.031,<br>-0.0067,<br>0.0136,<br>0.0177      | 0.012,<br>0.0003,<br>0.0132,<br>0.0177   | 0.033,<br>0.0073,<br>0.0137,<br>0.0179      | 0.227,<br>0.0227,<br>0.0163,<br>0.0186    | 0.604,<br>0.0412,<br>0.0180,<br>0.0192    | 0.973,<br>0.0903,<br>0.0192,<br>0.0201   |
| cML-MA-AIC-Profile | 0.987,<br>-0.0909,<br>0.0174,<br>0.0183     | 0.630,<br>-0.0411,<br>0.0170,<br>0.0184    | 0.239,<br>-0.0227,<br>0.0156,<br>0.0184      | 0.030,<br>-0.0067,<br>0.0135,<br>0.0177      | 0.012,<br>0.0003,<br>0.0132,<br>0.0177   | 0.033,<br>0.0073,<br>0.0137,<br>0.0179      | 0.226,<br>0.0227,<br>0.0163,<br>0.0186    | 0.603,<br>0.0412,<br>0.0180,<br>0.0193    | 0.973,<br>0.0904,<br>0.0192,<br>0.0201   |
| cML-AIC            | 0.998,<br>-0.0951,<br>0.0189,<br>0.0147     | 0.798,<br>-0.0451,<br>0.0191,<br>0.015     | 0.445,<br>-0.0257,<br>0.0151                 | 0.123,<br>-0.0079,<br>0.0173,<br>0.0152      | 0.079,<br>0.0002,<br>0.0170,<br>0.0152   | 0.114,<br>0.0085,<br>0.0175,<br>0.0153      | 0.444,<br>0.0260,<br>0.0191,<br>0.0154    | 0.774,<br>0.0455,<br>0.0200,<br>0.0156    | 0.985,<br>0.0950,<br>0.0209,<br>0.016    |
| cML-AIC-Profile    | 0.998,<br>-0.0952,<br>0.0189,<br>0.0147     | 0.796,<br>-0.0451,<br>0.0191,<br>0.015     | 0.445,<br>-0.0257,<br>0.0185,<br>0.0151      | 0.122,<br>-0.0079,<br>0.0173,<br>0.0152      | 0.078,<br>0.0002,<br>0.0170,<br>0.0153   | 0.114,<br>0.0085,<br>0.0175,<br>0.0153      | 0.442,<br>0.0260,<br>0.0191,<br>0.0154    | 0.774,<br>0.0455,<br>0.0200,<br>0.0156    | 0.985,<br>0.0951,<br>0.0210,<br>0.016    |
| cML-MA-BIC         | 1.000,<br>-0.0999,<br>0.0134,<br>0.0136     | 0.949,<br>-0.0499,<br>0.0137,<br>0.0138    | 0.575,<br>-0.0299,<br>0.0138,<br>0.0139      | 0.112,<br>-0.0100,<br>0.0139,<br>0.0141      | 0.043,<br>0.0000,<br>0.0139,<br>0.0141   | 0.103,<br>0.0100,<br>0.0140,<br>0.0142      | 0.560,<br>0.0299,<br>0.0142,<br>0.0143    | 0.926,<br>0.0499,<br>0.0144,<br>0.0145    | 1.000,<br>0.0999,<br>0.0148,<br>0.0149   |
| cML-MA-BIC-Profile | 1.000,<br>-0.0999,<br>0.0134,<br>0.0136     | 0.948,<br>-0.0499,<br>0.0137,<br>0.0138    | 0.575,<br>-0.0299,<br>0.0138,<br>0.014       | 0.112,<br>-0.0100,<br>0.0139,<br>0.0141      | 0.043,<br>0.0000,<br>0.0139,<br>0.0141   | 0.103,<br>0.0100,<br>0.0140,<br>0.0142      | 0.559,<br>0.0299,<br>0.0142,<br>0.0143    | 0.926,<br>0.0499,<br>0.0144,<br>0.0145    | 1.000,<br>0.0999,<br>0.0148,<br>0.0149   |
| cML-BIC            | 1.000,<br>-0.1000,<br>0.0134,<br>0.0135     | 0.950,<br>-0.0500,<br>0.0136,<br>0.0137    | 0.584,<br>-0.0300,<br>0.0137,<br>0.0138      | 0.118,<br>-0.0100,<br>0.0139,<br>0.0139      | 0.044,<br>0.0000,<br>0.0140,<br>0.014    | 0.105,<br>0.0100,<br>0.0140,<br>0.0141      | 0.566,<br>0.0300,<br>0.0142,<br>0.0142    | 0.929,<br>0.0500,<br>0.0143,<br>0.0143    | 1.000,<br>0.1000,<br>0.0148,<br>0.0147   |
| cML-BIC-Profile    | 1.000,<br>-0.1000,<br>0.0134,<br>0.0135     | 0.949,<br>-0.0500,<br>0.0136,<br>0.0137    | 0.584,<br>-0.0300,<br>0.0137,<br>0.0138      | 0.117,<br>-0.0100,<br>0.0139,<br>0.0139      | 0.044,<br>0.0000,<br>0.0140,<br>0.014    | 0.104,<br>0.0100,<br>0.0140,<br>0.0141      | 0.565,<br>0.0300,<br>0.0142,<br>0.0142    | 0.929,<br>0.0500,<br>0.0143,<br>0.0143    | 1.000,<br>0.1000,<br>0.0148,<br>0.0147   |
| MR-Mix             | 0.993,<br>-0.1019,<br>0.0151,<br>0.0177     | 0.826,<br>-0.0500,<br>0.0149,<br>0.0178    | 0.410,<br>-0.0300,<br>0.0148,<br>0.0178      | 0.063,<br>-0.0100,<br>0.0149,<br>0.0178      | 0.024,<br>-0.0001,<br>0.0149,<br>0.0178  | 0.058,<br>0.0096,<br>0.0149,<br>0.018       | 0.381,<br>0.0288,<br>0.0150,<br>0.0178    | 0.809,<br>0.0476,<br>0.0149,<br>0.0179    | 0.989,<br>0.0931,<br>0.0151,<br>0.0176   |
| MR-ContMix         | 1.000,<br>-0.0998,<br>0.0137,<br>NA         | 0.949,<br>-0.0499,<br>0.0140,<br>NA        | 0.618,<br>-0.0299,<br>0.0141,<br>NA          | 0.147,<br>-0.0099,<br>0.0143,<br>NA          | 0.068,<br>0.0001,<br>0.0144,<br>NA       | 0.130,<br>0.0101,<br>0.0145,<br>NA          | 0.591,<br>0.0301,<br>0.0148,<br>NA        | 0.930,<br>0.0500,<br>0.0149,<br>NA        | 1.000,<br>0.0999,<br>0.0154,<br>NA       |
| MR-Lasso           | 0.998,<br>-0.1096,<br>0.2275,<br>0.0205     | 0.920,<br>-0.0598,<br>0.2284,<br>0.0207    | 0.537,<br>-0.0399,<br>0.2284,<br>0.0208      | 0.136,<br>-0.0199,<br>0.2296,<br>0.021       | 0.074,<br>-0.0099,<br>0.2296,<br>0.021   | 0.124,<br>0.0001,<br>0.2296,<br>0.0211      | 0.497,<br>0.0202,<br>0.2294,<br>0.0212    | 0.886,<br>0.0402,<br>0.2294,<br>0.0213    | 0.996,<br>0.0905,<br>0.2315,<br>0.0215   |
| MR-PRESSO          | 0.435,<br>-0.1182,<br>0.2976,<br>0.1707     | 0.358,<br>-0.0684,<br>0.2975,<br>0.1701    | 0.244,<br>-0.0486,<br>0.2975,<br>0.1701      | 0.143,<br>-0.0285,<br>0.2974,<br>0.1697      | 0.127,<br>-0.0183,<br>0.2974,<br>0.1694  | 0.145,<br>-0.0082,<br>0.2972,<br>0.169      | 0.235,<br>0.0119,<br>0.2972,<br>0.1686    | 0.355,<br>0.0322,<br>0.2970,<br>0.1678    | 0.451,<br>0.0831,<br>0.2967,<br>0.166    |
| MR-IVW             | 0.101,<br>-0.1186,<br>0.3029,<br>0.285      | 0.087,<br>-0.0681,<br>0.3029,<br>0.285     | 0.087,<br>-0.0479,<br>0.3029,<br>0.285       | 0.082,<br>-0.0277,<br>0.3029,<br>0.2849      | 0.084,<br>-0.0176,<br>0.3029,<br>0.2849  | 0.084,<br>-0.0075,<br>0.3029,<br>0.2849     | 0.087,<br>0.0126,<br>0.3029,<br>0.2849    | 0.093,<br>0.0328,<br>0.3028,<br>0.2849    | 0.098,<br>0.0832,<br>0.3028,<br>0.2849   |
| MR-IVW-Oracle      | 1.000,<br>-0.0998,<br>0.0133,<br>0.0147     | 0.930,<br>-0.0499,<br>0.0135,<br>0.0149    | 0.518,<br>-0.0299,<br>0.0137,<br>0.015       | 0.098,<br>-0.0099,<br>0.0138,<br>0.0152      | 0.033,<br>0.0000,<br>0.0139,<br>0.0152   | 0.084,<br>0.0100,<br>0.0139,<br>0.0153      | 0.499,<br>0.0300,<br>0.0141,<br>0.0154    | 0.896,<br>0.0500,<br>0.0143,<br>0.0156    | 1.000,<br>0.0999,<br>0.0147,<br>0.016    |
| MR-Egger           | 0.074,<br>-0.0935,<br>1.6365,<br>1.5486     | 0.073,<br>-0.0448,<br>1.6361,<br>1.5485    | 0.074,<br>-0.0254,<br>1.6359,<br>1.5485      | 0.073,<br>-0.0059,<br>1.6358,<br>1.5485      | 0.073,<br>0.0038,<br>1.6357,<br>1.5484   | 0.074,<br>0.0135,<br>1.6356,<br>1.5484      | 0.071,<br>0.0329,<br>1.6355,<br>1.5484    | 0.068,<br>0.0524,<br>1.6353,<br>1.5483    | 0.068,<br>0.1009,<br>1.6349,<br>1.5482   |
| MR-Weighted-Median | 0.997,<br>-0.0976,<br>0.0180,<br>0.018      | 0.776,<br>-0.0488,<br>0.0182,<br>0.0182    | 0.351,<br>-0.0292,<br>0.0183,<br>0.0184      | 0.075,<br>-0.0097,<br>0.0185,<br>0.0185      | 0.047,<br>0.0000,<br>0.0186,<br>0.0186   | 0.077,<br>0.0098,<br>0.0187,<br>0.0187      | 0.349,<br>0.0292,<br>0.0189,<br>0.0188    | 0.733,<br>0.0487,<br>0.0192,<br>0.019     | 0.993,<br>0.0972,<br>0.0201,<br>0.0195   |
| MR-Weighted-Mode   | 0.911,<br>-0.0922,<br>0.0427,<br>0.0172     | 0.652,<br>-0.0465,<br>0.0431,<br>0.0175    | 0.537,<br>-0.0282,<br>0.0435,<br>0.0176      | 0.427,<br>-0.0099,<br>0.0445,<br>0.0178      | 0.425,<br>-0.0007,<br>0.0447,<br>0.0178  | 0.423,<br>0.0084,<br>0.0450,<br>0.018       | 0.495,<br>0.0266,<br>0.0457,<br>0.0182    | 0.645,<br>0.0451,<br>0.0468,<br>0.0184    | 0.893,<br>0.0905,<br>0.0490,<br>0.019    |
| MR-RAPS1           | 0.099,<br>-0.1177,<br>0.2950,<br>0.2782     | 0.092,<br>-0.0676,<br>0.2950,<br>0.2782    | 0.091,<br>-0.0476,<br>0.2950,<br>0.2782      | 0.089,<br>-0.0276,<br>0.2950,<br>0.2782      | 0.083,<br>-0.0176,<br>0.2950,<br>0.2782  | 0.085,<br>-0.0076,<br>0.2950,<br>0.2782     | 0.083,<br>0.0124,<br>0.2950,<br>0.2782    | 0.085,<br>0.0324,<br>0.2950,<br>0.2782    | 0.091,<br>0.0824,<br>0.2951,<br>0.2782   |
| MR-RAPS2           | 0.242,<br>-0.1225,<br>0.4831,<br>0.222      | 0.184,<br>-0.0638,<br>0.4537,<br>0.2304    | 0.175,<br>-0.0462,<br>0.4579,<br>0.232       | 0.169,<br>-0.0294,<br>0.4508,<br>0.2384      | 0.163,<br>-0.0199,<br>0.4538,<br>0.2375  | 0.158,<br>-0.0021,<br>0.4483,<br>0.2433     | 0.161,<br>0.0142,<br>0.4291,<br>0.2463    | 0.158,<br>0.0296,<br>0.4320,<br>0.2519    | 0.154,<br>0.0795,<br>0.4158,<br>0.2681   |
| MR-RAPS3           | 0.944,<br>-4.0115,<br>106.3931,<br>231.2409 | 0.934,<br>1.0247,<br>115.9425,<br>205.4114 | 0.943,<br>-7.7396,<br>283.5044,<br>1403.6719 | 0.945,<br>-9.6841,<br>302.9734,<br>1208.8483 | 0.937,<br>1.1517,<br>45.2390,<br>52.2286 | 0.934,<br>-9.9359,<br>206.3759,<br>898.1968 | 0.939,<br>2.0667,<br>72.1215,<br>138.1285 | 0.940,<br>-2.4343,<br>39.6826,<br>34.3873 | 0.952,<br>-0.5707,<br>32.6778,<br>22.666 |
| MR-RAPS4           | 0.998,<br>0.8086,<br>1.5711,<br>0.06        | 0.995,<br>0.6270,<br>1.7532,<br>0.0758     | 0.993,<br>0.5328,<br>1.8458,<br>0.1009       | 0.993,<br>0.3433,<br>1.9177,<br>0.0992       | 0.995,<br>0.1680,<br>1.9255,<br>0.0845   | 0.992,<br>0.1248,<br>1.9509,<br>0.1561      | 0.991,<br>-0.0159,<br>2.0202,<br>0.1601   | 0.992,<br>-0.2282,<br>1.9963,<br>0.1153   | 0.993,<br>-0.5607,<br>1.9078,<br>1.2342  |



Table S59: Main simulations: in each cell, from top to bottom are empirical type-I error/power, mean( $\hat{\theta}$ ), SD( $\hat{\theta}$ ), mean(SE( $\hat{\theta}$ )) when  $m = 20$ , the InSIDE violated,  $q = 0.2$ , and  $n = 50000$ .

| Methods \ $\theta$ | -0.1                                     | -0.05                                   | -0.03                                     | -0.01                                   | 0                                       | 0.01                                    | 0.03                                   | 0.05                                   | 0.1                                    |
|--------------------|------------------------------------------|-----------------------------------------|-------------------------------------------|-----------------------------------------|-----------------------------------------|-----------------------------------------|----------------------------------------|----------------------------------------|----------------------------------------|
| cML-MA-AIC         | 0.932,<br>-0.0908,<br>0.0251,<br>0.0237  | 0.453,<br>-0.0424,<br>0.0240,<br>0.0236 | 0.178,<br>-0.0245,<br>0.0224,<br>0.0234   | 0.058,<br>-0.0087,<br>0.0209,<br>0.0233 | 0.039,<br>-0.0011,<br>0.0205,<br>0.0233 | 0.040,<br>0.0064,<br>0.0208,<br>0.0235  | 0.145,<br>0.0223,<br>0.0223,<br>0.0239 | 0.389,<br>0.0400,<br>0.0244,<br>0.0246 | 0.892,<br>0.0881,<br>0.0271,<br>0.0258 |
| cML-MA-AIC-Profile | 0.933,<br>-0.0911,<br>0.0253,<br>0.0238  | 0.449,<br>-0.0425,<br>0.0241,<br>0.0237 | 0.177,<br>-0.0246,<br>0.0225,<br>0.0235   | 0.055,<br>-0.0087,<br>0.0209,<br>0.0234 | 0.039,<br>-0.0011,<br>0.0205,<br>0.0235 | 0.040,<br>0.0064,<br>0.0208,<br>0.0236  | 0.144,<br>0.0223,<br>0.0224,<br>0.0241 | 0.385,<br>0.0401,<br>0.0244,<br>0.0247 | 0.890,<br>0.0883,<br>0.0272,<br>0.0259 |
| cML-AIC            | 0.965,<br>-0.0956,<br>0.0268,<br>0.0199  | 0.611,<br>-0.0464,<br>0.0269,<br>0.0203 | 0.344,<br>-0.0275,<br>0.0260,<br>0.0205   | 0.133,<br>-0.0099,<br>0.0254,<br>0.0207 | 0.098,<br>-0.0009,<br>0.0253,<br>0.0207 | 0.115,<br>0.0078,<br>0.0254,<br>0.0208  | 0.278,<br>0.0252,<br>0.0262,<br>0.021  | 0.560,<br>0.0443,<br>0.0275,<br>0.0213 | 0.948,<br>0.0935,<br>0.0293,<br>0.0219 |
| cML-AIC-Profile    | 0.965,<br>-0.0959,<br>0.0270,<br>0.02    | 0.608,<br>-0.0464,<br>0.0270,<br>0.0204 | 0.337,<br>-0.0275,<br>0.0260,<br>0.0206   | 0.131,<br>-0.0099,<br>0.0254,<br>0.0208 | 0.098,<br>-0.0009,<br>0.0253,<br>0.0209 | 0.114,<br>0.0078,<br>0.0255,<br>0.021   | 0.274,<br>0.0252,<br>0.0263,<br>0.0212 | 0.558,<br>0.0443,<br>0.0275,<br>0.0214 | 0.947,<br>0.0936,<br>0.0293,<br>0.022  |
| cML-MA-BIC         | 1.000,<br>-0.1006,<br>0.0184,<br>0.0185  | 0.778,<br>-0.0506,<br>0.0187,<br>0.0188 | 0.366,<br>-0.0307,<br>0.0189,<br>0.019    | 0.083,<br>-0.0107,<br>0.0190,<br>0.0192 | 0.042,<br>-0.0008,<br>0.0191,<br>0.0192 | 0.078,<br>0.0092,<br>0.0192,<br>0.0193  | 0.315,<br>0.0291,<br>0.0194,<br>0.0195 | 0.677,<br>0.0490,<br>0.0197,<br>0.0197 | 0.996,<br>0.0990,<br>0.0203,<br>0.0203 |
| cML-MA-BIC-Profile | 1.000,<br>-0.1006,<br>0.0185,<br>0.0186  | 0.773,<br>-0.0506,<br>0.0187,<br>0.0189 | 0.365,<br>-0.0307,<br>0.0189,<br>0.019    | 0.082,<br>-0.0107,<br>0.0190,<br>0.0192 | 0.041,<br>-0.0008,<br>0.0191,<br>0.0193 | 0.077,<br>0.0092,<br>0.0192,<br>0.0194  | 0.313,<br>0.0291,<br>0.0194,<br>0.0196 | 0.674,<br>0.0490,<br>0.0197,<br>0.0198 | 0.996,<br>0.0990,<br>0.0203,<br>0.0204 |
| cML-BIC            | 1.000,<br>-0.1007,<br>0.0184,<br>0.0183  | 0.787,<br>-0.0508,<br>0.0187,<br>0.0186 | 0.384,<br>-0.0308,<br>0.0189,<br>0.0188   | 0.089,<br>-0.0108,<br>0.0190,<br>0.0189 | 0.045,<br>-0.0008,<br>0.0191,<br>0.019  | 0.085,<br>0.0092,<br>0.0192,<br>0.0191  | 0.320,<br>0.0292,<br>0.0194,<br>0.0193 | 0.697,<br>0.0491,<br>0.0196,<br>0.0195 | 0.996,<br>0.0991,<br>0.0202,<br>0.0201 |
| cML-BIC-Profile    | 1.000,<br>-0.1007,<br>0.0184,<br>0.0183  | 0.783,<br>-0.0508,<br>0.0187,<br>0.0187 | 0.382,<br>-0.0308,<br>0.0189,<br>0.0188   | 0.088,<br>-0.0108,<br>0.0190,<br>0.019  | 0.043,<br>-0.0008,<br>0.0191,<br>0.0191 | 0.085,<br>0.0092,<br>0.0192,<br>0.0192  | 0.319,<br>0.0292,<br>0.0194,<br>0.0194 | 0.696,<br>0.0491,<br>0.0196,<br>0.0196 | 0.996,<br>0.0991,<br>0.0202,<br>0.0202 |
| MR-Mix             | 0.952,<br>-0.1064,<br>0.0233,<br>0.0305  | 0.399,<br>-0.0524,<br>0.0231,<br>0.0305 | 0.135,<br>-0.0314,<br>0.0231,<br>0.0304   | 0.024,<br>-0.0107,<br>0.0229,<br>0.0304 | 0.016,<br>-0.0005,<br>0.0229,<br>0.0304 | 0.025,<br>0.0096,<br>0.0228,<br>0.0305  | 0.116,<br>0.0294,<br>0.0228,<br>0.0305 | 0.355,<br>0.0488,<br>0.0230,<br>0.0305 | 0.906,<br>0.0953,<br>0.0229,<br>0.0307 |
| MR-ContMix         | 1.000,<br>-0.1002,<br>0.0194,<br>NA      | 0.767,<br>-0.0505,<br>0.0197,<br>NA     | 0.375,<br>-0.0307,<br>0.0199,<br>NA       | 0.091,<br>-0.0107,<br>0.0200,<br>NA     | 0.054,<br>-0.0008,<br>0.0201,<br>NA     | 0.082,<br>0.0092,<br>0.0202,<br>NA      | 0.316,<br>0.0290,<br>0.0204,<br>NA     | 0.678,<br>0.0488,<br>0.0206,<br>NA     | 0.992,<br>0.0984,<br>0.0213,<br>NA     |
| MR-Lasso           | 0.999,<br>-0.1000,<br>0.0187,<br>0.0192  | 0.737,<br>-0.0504,<br>0.0191,<br>0.0195 | 0.343,<br>-0.0305,<br>0.0193,<br>0.0197   | 0.077,<br>-0.0106,<br>0.0195,<br>0.0199 | 0.042,<br>-0.0007,<br>0.0195,<br>0.02   | 0.071,<br>0.0092,<br>0.0196,<br>0.0201  | 0.290,<br>0.0290,<br>0.0198,<br>0.0203 | 0.659,<br>0.0488,<br>0.0200,<br>0.0205 | 0.995,<br>0.0983,<br>0.0206,<br>0.0211 |
| MR-PRESSO          | 0.851,<br>-0.0864,<br>0.0864,<br>0.0239  | 0.627,<br>-0.0388,<br>0.0823,<br>0.0233 | 0.438,<br>-0.0188,<br>0.0816,<br>0.0233   | 0.289,<br>0.0008,<br>0.0815,<br>0.0233  | 0.283,<br>0.0098,<br>0.0790,<br>0.0231  | 0.306,<br>0.0192,<br>0.0784,<br>0.0231  | 0.434,<br>0.0377,<br>0.0749,<br>0.0228 | 0.634,<br>0.0571,<br>0.0741,<br>0.0228 | 0.874,<br>0.1054,<br>0.0711,<br>0.0226 |
| MR-IVW             | 0.125,<br>-0.0745,<br>0.1795,<br>0.1673  | 0.107,<br>-0.0246,<br>0.1795,<br>0.1673 | 0.102,<br>-0.0047,<br>0.1794,<br>0.1673   | 0.088,<br>0.0153,<br>0.1794,<br>0.1673  | 0.085,<br>0.0253,<br>0.1794,<br>0.1673  | 0.085,<br>0.0352,<br>0.1794,<br>0.1673  | 0.084,<br>0.0552,<br>0.1794,<br>0.1673 | 0.095,<br>0.0751,<br>0.1793,<br>0.1673 | 0.136,<br>0.1250,<br>0.1793,<br>0.1673 |
| MR-IVW-Oracle      | 1.000,<br>-0.1002,<br>0.0183,<br>0.0194  | 0.738,<br>-0.0505,<br>0.0186,<br>0.0197 | 0.336,<br>-0.0306,<br>0.0187,<br>0.0199   | 0.066,<br>-0.0108,<br>0.0189,<br>0.0201 | 0.035,<br>-0.0008,<br>0.0190,<br>0.0202 | 0.064,<br>0.0091,<br>0.0190,<br>0.0203  | 0.281,<br>0.0290,<br>0.0192,<br>0.0205 | 0.647,<br>0.0488,<br>0.0194,<br>0.0207 | 0.995,<br>0.0985,<br>0.0200,<br>0.0212 |
| MR-Egger           | 0.299,<br>0.3418,<br>1.0256,<br>0.6476   | 0.300,<br>0.3876,<br>1.0259,<br>0.6478  | 0.302,<br>0.4059,<br>1.0260,<br>0.6479    | 0.308,<br>0.4242,<br>1.0261,<br>0.648   | 0.308,<br>0.4334,<br>1.0262,<br>0.648   | 0.311,<br>0.4425,<br>1.0263,<br>0.6481  | 0.312,<br>0.4608,<br>1.0264,<br>0.6482 | 0.320,<br>0.4791,<br>1.0265,<br>0.6483 | 0.326,<br>0.5248,<br>1.0269,<br>0.6486 |
| MR-Weighted-Median | 0.976,<br>-0.1001,<br>0.0234,<br>0.0255  | 0.529,<br>-0.0518,<br>0.0239,<br>0.026  | 0.212,<br>-0.0324,<br>0.0240,<br>0.0262   | 0.069,<br>-0.0131,<br>0.0243,<br>0.0264 | 0.036,<br>-0.0034,<br>0.0244,<br>0.0265 | 0.028,<br>0.0063,<br>0.0246,<br>0.0267  | 0.135,<br>0.0256,<br>0.0248,<br>0.0269 | 0.382,<br>0.0450,<br>0.0252,<br>0.0272 | 0.918,<br>0.0933,<br>0.0260,<br>0.028  |
| MR-Weighted-Mode   | 0.917,<br>-0.0988,<br>0.0286,<br>0.0324  | 0.327,<br>-0.0500,<br>0.0291,<br>0.033  | 0.111,<br>-0.0306,<br>0.0292,<br>0.0333   | 0.034,<br>-0.0111,<br>0.0294,<br>0.0336 | 0.023,<br>-0.0015,<br>0.0295,<br>0.0337 | 0.028,<br>0.0083,<br>0.0295,<br>0.0338  | 0.084,<br>0.0275,<br>0.0295,<br>0.0342 | 0.259,<br>0.0473,<br>0.0297,<br>0.0345 | 0.836,<br>0.0958,<br>0.0304,<br>0.0355 |
| MR-RAPS1           | 0.129,<br>-0.0762,<br>0.1737,<br>0.1633  | 0.100,<br>-0.0262,<br>0.1736,<br>0.1634 | 0.096,<br>-0.0062,<br>0.1736,<br>0.1634   | 0.088,<br>0.0138,<br>0.1736,<br>0.1634  | 0.088,<br>0.0238,<br>0.1736,<br>0.1634  | 0.082,<br>0.0338,<br>0.1736,<br>0.1634  | 0.083,<br>0.0537,<br>0.1736,<br>0.1635 | 0.095,<br>0.0737,<br>0.1736,<br>0.1635 | 0.146,<br>0.1237,<br>0.1736,<br>0.1635 |
| MR-RAPS2           | 0.993,<br>0.0501,<br>3.2512,<br>0.0463   | 0.921,<br>0.0099,<br>2.4769,<br>0.0546  | 0.763,<br>0.1838,<br>3.5239,<br>0.0847    | 0.634,<br>0.3564,<br>5.7200,<br>0.3273  | 0.626,<br>0.0002,<br>3.0576,<br>0.0839  | 0.639,<br>0.1485,<br>3.4577,<br>0.0648  | 0.752,<br>0.1815,<br>2.6805,<br>0.0536 | 0.895,<br>0.0654,<br>3.0321,<br>0.0481 | 0.994,<br>0.5181,<br>3.9835,<br>0.043  |
| MR-RAPS3           | 0.868,<br>-0.3884,<br>5.7295,<br>12.3079 | 0.865,<br>-0.0426,<br>5.5098,<br>0.062  | 0.866,<br>-0.3797,<br>12.1020,<br>26.2886 | 0.863,<br>0.0463,<br>0.4602,<br>0.0553  | 0.855,<br>0.0616,<br>0.4663,<br>0.0599  | 0.866,<br>0.3869,<br>9.4974,<br>31.1292 | 0.857,<br>0.1258,<br>0.3945,<br>0.0452 | 0.881,<br>0.1597,<br>0.3779,<br>0.042  | 0.888,<br>0.2408,<br>0.3489,<br>0.0391 |
| MR-RAPS4           | 1.000,<br>-0.1754,<br>1.5628,<br>0.047   | 0.955,<br>-0.0457,<br>1.5228,<br>0.0562 | 0.862,<br>-0.0576,<br>1.5129,<br>0.0869   | 0.796,<br>0.0003,<br>1.5560,<br>0.3226  | 0.788,<br>0.0546,<br>1.4735,<br>0.0817  | 0.789,<br>0.0755,<br>1.5352,<br>0.0628  | 0.854,<br>0.1215,<br>1.6267,<br>0.0675 | 0.935,<br>0.1859,<br>1.5619,<br>0.0484 | 1.000,<br>0.3599,<br>1.3020,<br>0.0377 |

Table S60: Main simulations: in each cell, from top to bottom are empirical type-I error/power, mean( $\hat{\theta}$ ), SD( $\hat{\theta}$ ), mean(SE( $\hat{\theta}$ )) when  $m = 20$ , the InSIDE violated,  $q = 0.2$ , and  $n = 100000$ .

| Methods \ $\theta$ | -0.1                                    | -0.05                                   | -0.03                                   | -0.01                                   | 0                                       | 0.01                                   | 0.03                                   | 0.05                                   | 0.1                                    |
|--------------------|-----------------------------------------|-----------------------------------------|-----------------------------------------|-----------------------------------------|-----------------------------------------|----------------------------------------|----------------------------------------|----------------------------------------|----------------------------------------|
| cML-MA-AIC         | 0.996,<br>-0.0929,<br>0.0175,<br>0.0166 | 0.712,<br>-0.0432,<br>0.0175,<br>0.0168 | 0.298,<br>-0.0241,<br>0.0166,<br>0.0166 | 0.068,<br>-0.0072,<br>0.0150,<br>0.0165 | 0.033,<br>0.0005,<br>0.0149,<br>0.0165  | 0.077,<br>0.0082,<br>0.0152,<br>0.0166 | 0.310,<br>0.0251,<br>0.0170,<br>0.0171 | 0.685,<br>0.0436,<br>0.0185,<br>0.0176 | 0.983,<br>0.0928,<br>0.0197,<br>0.0184 |
| cML-MA-AIC-Profile | 0.996,<br>-0.0931,<br>0.0176,<br>0.0166 | 0.711,<br>-0.0432,<br>0.0175,<br>0.0168 | 0.298,<br>-0.0241,<br>0.0166,<br>0.0167 | 0.067,<br>-0.0072,<br>0.0150,<br>0.0165 | 0.033,<br>0.0005,<br>0.0149,<br>0.0165  | 0.076,<br>0.0082,<br>0.0152,<br>0.0167 | 0.310,<br>0.0251,<br>0.0170,<br>0.0172 | 0.683,<br>0.0437,<br>0.0185,<br>0.0177 | 0.983,<br>0.0930,<br>0.0198,<br>0.0184 |
| cML-AIC            | 0.998,<br>-0.0963,<br>0.0189,<br>0.014  | 0.831,<br>-0.0466,<br>0.0189,<br>0.0143 | 0.483,<br>-0.0271,<br>0.0187,<br>0.0144 | 0.149,<br>-0.0084,<br>0.0180,<br>0.0145 | 0.111,<br>0.0005,<br>0.0180,<br>0.0146  | 0.168,<br>0.0094,<br>0.0181,<br>0.0147 | 0.489,<br>0.0279,<br>0.0190,<br>0.0148 | 0.805,<br>0.0473,<br>0.0199,<br>0.015  | 0.991,<br>0.0967,<br>0.0209,<br>0.0154 |
| cML-AIC-Profile    | 0.998,<br>-0.0964,<br>0.0189,<br>0.0141 | 0.831,<br>-0.0467,<br>0.0189,<br>0.0143 | 0.482,<br>-0.0271,<br>0.0187,<br>0.0145 | 0.148,<br>-0.0084,<br>0.0180,<br>0.0146 | 0.107,<br>0.0005,<br>0.0180,<br>0.0147  | 0.168,<br>0.0094,<br>0.0181,<br>0.0147 | 0.486,<br>0.0279,<br>0.0190,<br>0.0149 | 0.804,<br>0.0473,<br>0.0200,<br>0.015  | 0.991,<br>0.0968,<br>0.0210,<br>0.0155 |
| cML-MA-BIC         | 1.000,<br>-0.0994,<br>0.0130,<br>0.013  | 0.959,<br>-0.0494,<br>0.0132,<br>0.0132 | 0.599,<br>-0.0293,<br>0.0133,<br>0.0133 | 0.096,<br>-0.0093,<br>0.0134,<br>0.0135 | 0.053,<br>0.0006,<br>0.0134,<br>0.0135  | 0.122,<br>0.0106,<br>0.0135,<br>0.0136 | 0.611,<br>0.0306,<br>0.0137,<br>0.0137 | 0.952,<br>0.0506,<br>0.0138,<br>0.0139 | 1.000,<br>0.1006,<br>0.0142,<br>0.0143 |
| cML-MA-BIC-Profile | 1.000,<br>-0.0994,<br>0.0130,<br>0.013  | 0.959,<br>-0.0494,<br>0.0132,<br>0.0133 | 0.597,<br>-0.0293,<br>0.0134,<br>0.0135 | 0.095,<br>-0.0093,<br>0.0134,<br>0.0135 | 0.052,<br>0.0006,<br>0.0134,<br>0.0136  | 0.119,<br>0.0106,<br>0.0135,<br>0.0136 | 0.609,<br>0.0306,<br>0.0137,<br>0.0138 | 0.952,<br>0.0506,<br>0.0138,<br>0.0139 | 1.000,<br>0.1006,<br>0.0142,<br>0.0143 |
| cML-BIC            | 1.000,<br>-0.0995,<br>0.0130,<br>0.0129 | 0.963,<br>-0.0495,<br>0.0132,<br>0.0131 | 0.610,<br>-0.0294,<br>0.0133,<br>0.0132 | 0.106,<br>-0.0094,<br>0.0134,<br>0.0133 | 0.053,<br>0.0006,<br>0.0135,<br>0.0134  | 0.127,<br>0.0106,<br>0.0136,<br>0.0135 | 0.617,<br>0.0306,<br>0.0137,<br>0.0136 | 0.952,<br>0.0507,<br>0.0138,<br>0.0138 | 1.000,<br>0.1007,<br>0.0142,<br>0.0142 |
| cML-BIC-Profile    | 1.000,<br>-0.0995,<br>0.0130,<br>0.0129 | 0.962,<br>-0.0495,<br>0.0132,<br>0.0131 | 0.606,<br>-0.0294,<br>0.0133,<br>0.0132 | 0.105,<br>-0.0094,<br>0.0134,<br>0.0134 | 0.053,<br>0.0006,<br>0.0135,<br>0.0134  | 0.126,<br>0.0106,<br>0.0136,<br>0.0135 | 0.617,<br>0.0306,<br>0.0137,<br>0.0136 | 0.952,<br>0.0507,<br>0.0138,<br>0.0138 | 1.000,<br>0.1007,<br>0.0142,<br>0.0142 |
| MR-Mix             | 0.996,<br>-0.1054,<br>0.0167,<br>0.0222 | 0.690,<br>-0.0513,<br>0.0168,<br>0.0221 | 0.235,<br>-0.0302,<br>0.0167,<br>0.022  | 0.027,<br>-0.0096,<br>0.0166,<br>0.022  | 0.015,<br>0.0006,<br>0.0166,<br>0.022   | 0.035,<br>0.0106,<br>0.0167,<br>0.0219 | 0.256,<br>0.0305,<br>0.0166,<br>0.0219 | 0.672,<br>0.0501,<br>0.0168,<br>0.0219 | 0.994,<br>0.0968,<br>0.0167,<br>0.022  |
| MR-ContMix         | 1.000,<br>-0.0991,<br>0.0135,<br>NA     | 0.950,<br>-0.0492,<br>0.0138,<br>NA     | 0.590,<br>-0.0292,<br>0.0139,<br>NA     | 0.113,<br>-0.0093,<br>0.0140,<br>NA     | 0.068,<br>0.0007,<br>0.0141,<br>NA      | 0.140,<br>0.0107,<br>0.0141,<br>NA     | 0.617,<br>0.0306,<br>0.0143,<br>NA     | 0.937,<br>0.0506,<br>0.0145,<br>NA     | 1.000,<br>0.1006,<br>0.0149,<br>NA     |
| MR-Lasso           | 1.000,<br>-0.0992,<br>0.0133,<br>0.0136 | 0.942,<br>-0.0492,<br>0.0133,<br>0.0139 | 0.560,<br>-0.0292,<br>0.0134,<br>0.014  | 0.089,<br>-0.0093,<br>0.0136,<br>0.0141 | 0.045,<br>0.0007,<br>0.0136,<br>0.0142  | 0.117,<br>0.0107,<br>0.0137,<br>0.0142 | 0.571,<br>0.0307,<br>0.0139,<br>0.0144 | 0.934,<br>0.0506,<br>0.0141,<br>0.0145 | 1.000,<br>0.1006,<br>0.0146,<br>0.0149 |
| MR-PRESSO          | 0.797,<br>-0.0817,<br>0.1256,<br>0.0349 | 0.681,<br>-0.0332,<br>0.1245,<br>0.0342 | 0.503,<br>-0.0138,<br>0.1241,<br>0.0337 | 0.325,<br>0.0049,<br>0.1228,<br>0.0331  | 0.309,<br>0.0146,<br>0.1219,<br>0.0326  | 0.341,<br>0.0244,<br>0.1209,<br>0.0321 | 0.542,<br>0.0444,<br>0.1198,<br>0.0317 | 0.709,<br>0.0627,<br>0.1174,<br>0.0308 | 0.846,<br>0.1112,<br>0.1142,<br>0.0295 |
| MR-IVW             | 0.122,<br>-0.0825,<br>0.1736,<br>0.1665 | 0.082,<br>-0.0324,<br>0.1736,<br>0.1665 | 0.076,<br>-0.0124,<br>0.1736,<br>0.1665 | 0.065,<br>0.0077,<br>0.1736,<br>0.1665  | 0.067,<br>0.0177,<br>0.1736,<br>0.1665  | 0.068,<br>0.0277,<br>0.1736,<br>0.1665 | 0.074,<br>0.0477,<br>0.1736,<br>0.1665 | 0.090,<br>0.0677,<br>0.1736,<br>0.1665 | 0.133,<br>0.1177,<br>0.1736,<br>0.1665 |
| MR-IVW-Oracle      | 1.000,<br>-0.0992,<br>0.0129,<br>0.0137 | 0.947,<br>-0.0493,<br>0.0131,<br>0.0139 | 0.556,<br>-0.0293,<br>0.0132,<br>0.0141 | 0.084,<br>-0.0094,<br>0.0133,<br>0.0142 | 0.040,<br>0.0006,<br>0.0133,<br>0.0143  | 0.107,<br>0.0106,<br>0.0134,<br>0.0143 | 0.560,<br>0.0306,<br>0.0135,<br>0.0145 | 0.938,<br>0.0505,<br>0.0137,<br>0.0146 | 1.000,<br>0.1004,<br>0.0140,<br>0.0151 |
| MR-Egger           | 0.296,<br>0.3378,<br>1.0560,<br>0.6644  | 0.297,<br>0.3856,<br>1.0560,<br>0.6645  | 0.294,<br>0.4047,<br>1.0560,<br>0.6645  | 0.296,<br>0.4238,<br>1.0560,<br>0.6645  | 0.295,<br>0.4334,<br>1.0560,<br>0.6645  | 0.298,<br>0.4430,<br>1.0560,<br>0.6645 | 0.303,<br>0.4621,<br>1.0559,<br>0.6646 | 0.308,<br>0.4812,<br>1.0559,<br>0.6646 | 0.317,<br>0.5289,<br>1.0559,<br>0.6647 |
| MR-Weighted-Median | 1.000,<br>-0.0991,<br>0.0166,<br>0.018  | 0.794,<br>-0.0501,<br>0.0169,<br>0.0183 | 0.362,<br>-0.0304,<br>0.0170,<br>0.0185 | 0.071,<br>-0.0108,<br>0.0172,<br>0.0186 | 0.034,<br>-0.0010,<br>0.0173,<br>0.0187 | 0.057,<br>0.0089,<br>0.0174,<br>0.0188 | 0.332,<br>0.0285,<br>0.0176,<br>0.019  | 0.715,<br>0.0482,<br>0.0178,<br>0.0192 | 0.997,<br>0.0972,<br>0.0184,<br>0.0198 |
| MR-Weighted-Mode   | 0.988,<br>-0.0982,<br>0.0200,<br>0.0247 | 0.583,<br>-0.0487,<br>0.0197,<br>0.0251 | 0.221,<br>-0.0289,<br>0.0197,<br>0.0253 | 0.035,<br>-0.0094,<br>0.0198,<br>0.0255 | 0.011,<br>0.0006,<br>0.0200,<br>0.0256  | 0.035,<br>0.0107,<br>0.0202,<br>0.0257 | 0.228,<br>0.0303,<br>0.0203,<br>0.0259 | 0.575,<br>0.0499,<br>0.0204,<br>0.0262 | 0.978,<br>0.0999,<br>0.0212,<br>0.0269 |
| MR-RAPS1           | 0.128,<br>-0.0825,<br>0.1704,<br>0.1621 | 0.086,<br>-0.0325,<br>0.1704,<br>0.1621 | 0.075,<br>-0.0124,<br>0.1705,<br>0.1621 | 0.074,<br>0.0076,<br>0.1705,<br>0.1621  | 0.075,<br>0.0176,<br>0.1705,<br>0.1621  | 0.075,<br>0.0276,<br>0.1705,<br>0.1621 | 0.072,<br>0.0476,<br>0.1705,<br>0.1622 | 0.085,<br>0.0676,<br>0.1705,<br>0.1622 | 0.130,<br>0.1176,<br>0.1705,<br>0.1622 |
| MR-RAPS2           | 0.994,<br>0.0931,<br>3.3651,<br>0.0343  | 0.984,<br>0.1847,<br>4.0240,<br>0.0349  | 0.885,<br>-0.0938,<br>4.1144,<br>0.0378 | 0.709,<br>0.1946,<br>5.7829,<br>0.0463  | 0.682,<br>0.1062,<br>2.4081,<br>0.0797  | 0.739,<br>0.1451,<br>3.0307,<br>0.0632 | 0.891,<br>0.1144,<br>2.1872,<br>0.0382 | 0.985,<br>0.3700,<br>2.9876,<br>0.036  | 0.997,<br>0.3341,<br>3.2080,<br>0.1277 |
| MR-RAPS3           | 0.916,<br>-0.1917,<br>0.4367,<br>0.0382 | 0.896,<br>-0.0748,<br>1.2245,<br>0.0356 | 0.885,<br>0.0073,<br>1.2245,<br>0.036   | 0.892,<br>0.0149,<br>0.3966,<br>0.033   | 0.896,<br>0.0345,<br>0.3894,<br>0.0309  | 0.910,<br>0.0539,<br>0.3838,<br>0.0302 | 0.914,<br>0.0918,<br>0.3736,<br>0.0293 | 0.892,<br>0.1284,<br>0.3631,<br>0.0287 | 0.907,<br>0.2169,<br>0.3328,<br>0.0293 |
| MR-RAPS4           | 1.000,<br>-0.0389,<br>1.7384,<br>0.0325 | 0.992,<br>0.0334,<br>1.7535,<br>0.0376  | 0.959,<br>0.0483,<br>1.7108,<br>0.0339  | 0.884,<br>0.2189,<br>3.5802,<br>0.0813  | 0.871,<br>0.1198,<br>1.6998,<br>0.0805  | 0.886,<br>0.1617,<br>1.6979,<br>0.0614 | 0.963,<br>0.1920,<br>1.7682,<br>0.0387 | 0.996,<br>0.2335,<br>1.6196,<br>0.033  | 0.999,<br>0.3337,<br>1.5870,<br>0.1237 |

Table S61: Main simulations: in each cell, from top to bottom are empirical type-I error/power, mean( $\hat{\theta}$ ), SD( $\hat{\theta}$ ), mean(SE( $\hat{\theta}$ )) when  $m = 20$ , the InSIDE violated,  $q = 0.2$ , and  $n = 200000$ .

| Methods \ $\theta$ | -0.1                                    | -0.05                                   | -0.03                                   | -0.01                                   | 0                                       | 0.01                                   | 0.03                                   | 0.05                                   | 0.1                                    |
|--------------------|-----------------------------------------|-----------------------------------------|-----------------------------------------|-----------------------------------------|-----------------------------------------|----------------------------------------|----------------------------------------|----------------------------------------|----------------------------------------|
| cML-MA-AIC         | 1.000,<br>-0.0947,<br>0.0124,<br>0.0118 | 0.927,<br>-0.0447,<br>0.0125,<br>0.012  | 0.546,<br>-0.0251,<br>0.0121,<br>0.0119 | 0.086,<br>-0.0073,<br>0.0108,<br>0.0117 | 0.039,<br>0.0006,<br>0.0106,<br>0.0117  | 0.104,<br>0.0084,<br>0.0113,<br>0.0118 | 0.576,<br>0.0262,<br>0.0131,<br>0.0122 | 0.911,<br>0.0458,<br>0.0138,<br>0.0125 | 1.000,<br>0.0955,<br>0.0141,<br>0.0129 |
| cML-MA-AIC-Profile | 1.000,<br>-0.0948,<br>0.0124,<br>0.0118 | 0.927,<br>-0.0448,<br>0.0125,<br>0.012  | 0.546,<br>-0.0251,<br>0.0121,<br>0.012  | 0.086,<br>-0.0073,<br>0.0108,<br>0.0117 | 0.039,<br>0.0005,<br>0.0106,<br>0.0117  | 0.103,<br>0.0084,<br>0.0113,<br>0.0118 | 0.576,<br>0.0262,<br>0.0131,<br>0.0122 | 0.911,<br>0.0458,<br>0.0138,<br>0.0125 | 1.000,<br>0.0956,<br>0.0141,<br>0.0129 |
| cML-AIC            | 1.000,<br>-0.0971,<br>0.0130,<br>0.0099 | 0.964,<br>-0.0473,<br>0.0131,<br>0.0101 | 0.725,<br>-0.0273,<br>0.0132,<br>0.0102 | 0.188,<br>-0.0085,<br>0.0127,<br>0.0103 | 0.104,<br>0.0005,<br>0.0127,<br>0.0104  | 0.204,<br>0.0095,<br>0.0131,<br>0.0104 | 0.725,<br>0.0284,<br>0.0142,<br>0.0105 | 0.957,<br>0.0481,<br>0.0147,<br>0.0106 | 1.000,<br>0.0981,<br>0.0149,<br>0.0109 |
| cML-AIC-Profile    | 1.000,<br>-0.0972,<br>0.0130,<br>0.01   | 0.964,<br>-0.0473,<br>0.0132,<br>0.0101 | 0.725,<br>-0.0273,<br>0.0132,<br>0.0102 | 0.188,<br>-0.0085,<br>0.0127,<br>0.0103 | 0.102,<br>0.0005,<br>0.0127,<br>0.0104  | 0.204,<br>0.0095,<br>0.0131,<br>0.0104 | 0.724,<br>0.0284,<br>0.0142,<br>0.0105 | 0.957,<br>0.0482,<br>0.0146,<br>0.0107 | 1.000,<br>0.0982,<br>0.0149,<br>0.011  |
| cML-MA-BIC         | 1.000,<br>-0.0998,<br>0.0095,<br>0.0092 | 0.999,<br>-0.0498,<br>0.0096,<br>0.0094 | 0.881,<br>-0.0298,<br>0.0097,<br>0.0095 | 0.188,<br>-0.0098,<br>0.0097,<br>0.0095 | 0.050,<br>0.0001,<br>0.0098,<br>0.0096  | 0.183,<br>0.0101,<br>0.0098,<br>0.0096 | 0.870,<br>0.0301,<br>0.0099,<br>0.0097 | 1.000,<br>0.0501,<br>0.0100,<br>0.0098 | 1.000,<br>0.1001,<br>0.0102,<br>0.0101 |
| cML-MA-BIC-Profile | 1.000,<br>-0.0998,<br>0.0095,<br>0.0092 | 0.999,<br>-0.0498,<br>0.0096,<br>0.0094 | 0.881,<br>-0.0298,<br>0.0097,<br>0.0095 | 0.188,<br>-0.0098,<br>0.0097,<br>0.0096 | 0.050,<br>0.0001,<br>0.0098,<br>0.0096  | 0.183,<br>0.0101,<br>0.0098,<br>0.0096 | 0.869,<br>0.0301,<br>0.0099,<br>0.0097 | 1.000,<br>0.0501,<br>0.0100,<br>0.0098 | 1.000,<br>0.1001,<br>0.0102,<br>0.0101 |
| cML-BIC            | 1.000,<br>-0.0999,<br>0.0095,<br>0.0091 | 0.999,<br>-0.0499,<br>0.0096,<br>0.0093 | 0.886,<br>-0.0299,<br>0.0097,<br>0.0094 | 0.192,<br>-0.0099,<br>0.0098,<br>0.0095 | 0.053,<br>0.0001,<br>0.0098,<br>0.0095  | 0.189,<br>0.0101,<br>0.0098,<br>0.0096 | 0.872,<br>0.0301,<br>0.0099,<br>0.0097 | 1.000,<br>0.0501,<br>0.0100,<br>0.0098 | 1.000,<br>0.1001,<br>0.0103,<br>0.01   |
| cML-BIC-Profile    | 1.000,<br>-0.0999,<br>0.0095,<br>0.0091 | 0.999,<br>-0.0499,<br>0.0096,<br>0.0093 | 0.886,<br>-0.0299,<br>0.0097,<br>0.0094 | 0.192,<br>-0.0099,<br>0.0098,<br>0.0095 | 0.053,<br>0.0001,<br>0.0098,<br>0.0095  | 0.188,<br>0.0101,<br>0.0098,<br>0.0096 | 0.871,<br>0.0301,<br>0.0099,<br>0.0097 | 1.000,<br>0.0501,<br>0.0100,<br>0.0098 | 1.000,<br>0.1001,<br>0.0103,<br>0.0101 |
| MR-Mix             | 1.000,<br>-0.1060,<br>0.0128,<br>0.0161 | 0.919,<br>-0.0522,<br>0.0129,<br>0.0159 | 0.522,<br>-0.0311,<br>0.0128,<br>0.016  | 0.062,<br>-0.0104,<br>0.0128,<br>0.0159 | 0.016,<br>-0.0003,<br>0.0128,<br>0.0159 | 0.065,<br>0.0098,<br>0.0128,<br>0.0159 | 0.476,<br>0.0297,<br>0.0128,<br>0.0159 | 0.890,<br>0.0491,<br>0.0129,<br>0.0159 | 1.000,<br>0.0960,<br>0.0128,<br>0.016  |
| MR-ContMix         | 1.000,<br>-0.0996,<br>0.0098,<br>NA     | 0.999,<br>-0.0497,<br>0.0099,<br>NA     | 0.876,<br>-0.0298,<br>0.0099,<br>NA     | 0.204,<br>-0.0098,<br>0.0100,<br>NA     | 0.069,<br>0.0002,<br>0.0100,<br>NA      | 0.195,<br>0.0102,<br>0.0100,<br>NA     | 0.873,<br>0.0302,<br>0.0101,<br>NA     | 1.000,<br>0.0502,<br>0.0102,<br>NA     | 1.000,<br>0.1001,<br>0.0104,<br>NA     |
| MR-Lasso           | 1.000,<br>-0.0997,<br>0.0097,<br>0.0096 | 0.998,<br>-0.0498,<br>0.0098,<br>0.0098 | 0.857,<br>-0.0298,<br>0.0099,<br>0.0099 | 0.170,<br>-0.0099,<br>0.0100,<br>0.01   | 0.049,<br>0.0001,<br>0.0100,<br>0.0101  | 0.159,<br>0.0101,<br>0.0100,<br>0.0101 | 0.836,<br>0.0301,<br>0.0100,<br>0.0102 | 1.000,<br>0.0501,<br>0.0101,<br>0.0103 | 1.000,<br>0.1000,<br>0.0105,<br>0.0106 |
| MR-PRESSO          | 0.703,<br>-0.0815,<br>0.1538,<br>0.0583 | 0.614,<br>-0.0330,<br>0.1534,<br>0.0573 | 0.515,<br>-0.0130,<br>0.1533,<br>0.0572 | 0.314,<br>0.0071,<br>0.1530,<br>0.0568  | 0.261,<br>0.0168,<br>0.1528,<br>0.0566  | 0.314,<br>0.0269,<br>0.1527,<br>0.0565 | 0.511,<br>0.0465,<br>0.1521,<br>0.0557 | 0.625,<br>0.0656,<br>0.1512,<br>0.0544 | 0.756,<br>0.1136,<br>0.1497,<br>0.0522 |
| MR-IVW             | 0.109,<br>-0.0832,<br>0.1742,<br>0.1672 | 0.080,<br>-0.0331,<br>0.1742,<br>0.1671 | 0.076,<br>-0.0130,<br>0.1742,<br>0.1671 | 0.077,<br>0.0070,<br>0.1742,<br>0.1671  | 0.081,<br>0.0170,<br>0.1742,<br>0.1671  | 0.081,<br>0.0271,<br>0.1742,<br>0.1671 | 0.083,<br>0.0471,<br>0.1742,<br>0.1671 | 0.089,<br>0.0671,<br>0.1742,<br>0.1671 | 0.119,<br>0.1172,<br>0.1742,<br>0.1671 |
| MR-IVW-Oracle      | 1.000,<br>-0.0997,<br>0.0094,<br>0.0097 | 0.999,<br>-0.0498,<br>0.0095,<br>0.0099 | 0.862,<br>-0.0298,<br>0.0096,<br>0.01   | 0.161,<br>-0.0099,<br>0.0096,<br>0.0101 | 0.042,<br>0.0001,<br>0.0097,<br>0.0101  | 0.153,<br>0.0101,<br>0.0097,<br>0.0102 | 0.837,<br>0.0301,<br>0.0098,<br>0.0103 | 1.000,<br>0.0500,<br>0.0099,<br>0.0104 | 1.000,<br>0.1000,<br>0.0101,<br>0.0107 |
| MR-Egger           | 0.311,<br>0.2987,<br>1.0869,<br>0.663   | 0.311,<br>0.3476,<br>1.0867,<br>0.663   | 0.311,<br>0.3671,<br>1.0866,<br>0.663   | 0.308,<br>0.3866,<br>1.0865,<br>0.663   | 0.310,<br>0.3964,<br>1.0865,<br>0.663   | 0.314,<br>0.4062,<br>1.0864,<br>0.663  | 0.318,<br>0.4257,<br>1.0864,<br>0.663  | 0.320,<br>0.4452,<br>1.0863,<br>0.663  | 0.334,<br>0.4940,<br>1.0861,<br>0.663  |
| MR-Weighted-Median | 1.000,<br>-0.0995,<br>0.0118,<br>0.0128 | 0.976,<br>-0.0502,<br>0.0121,<br>0.013  | 0.652,<br>-0.0304,<br>0.0122,<br>0.0131 | 0.113,<br>-0.0106,<br>0.0123,<br>0.0132 | 0.035,<br>-0.0007,<br>0.0124,<br>0.0133 | 0.087,<br>0.0092,<br>0.0125,<br>0.0133 | 0.590,<br>0.0290,<br>0.0126,<br>0.0135 | 0.949,<br>0.0489,<br>0.0127,<br>0.0136 | 1.000,<br>0.0983,<br>0.0132,<br>0.014  |
| MR-Weighted-Mode   | 0.997,<br>-0.0992,<br>0.0148,<br>0.0165 | 0.890,<br>-0.0493,<br>0.0147,<br>0.0167 | 0.446,<br>-0.0292,<br>0.0147,<br>0.0169 | 0.063,<br>-0.0093,<br>0.0149,<br>0.017  | 0.014,<br>0.0007,<br>0.0149,<br>0.0171  | 0.059,<br>0.0106,<br>0.0149,<br>0.0172 | 0.459,<br>0.0305,<br>0.0151,<br>0.0173 | 0.860,<br>0.0503,<br>0.0150,<br>0.0175 | 0.994,<br>0.0999,<br>0.0156,<br>0.018  |
| MR-RAPS1           | 0.109,<br>-0.0841,<br>0.1685,<br>0.1628 | 0.082,<br>-0.0341,<br>0.1685,<br>0.1628 | 0.082,<br>-0.0141,<br>0.1685,<br>0.1628 | 0.077,<br>0.0059,<br>0.1685,<br>0.1628  | 0.073,<br>0.0159,<br>0.1685,<br>0.1628  | 0.073,<br>0.0259,<br>0.1685,<br>0.1628 | 0.082,<br>0.0459,<br>0.1685,<br>0.1628 | 0.088,<br>0.0659,<br>0.1686,<br>0.1629 | 0.126,<br>0.1160,<br>0.1686,<br>0.1629 |
| MR-RAPS2           | 0.997,<br>0.4776,<br>4.6454,<br>0.0224  | 0.997,<br>0.2965,<br>3.0003,<br>0.0224  | 0.967,<br>0.3959,<br>3.3803,<br>0.0243  | 0.773,<br>0.8531,<br>9.3107,<br>0.0277  | 0.719,<br>0.4960,<br>5.4037,<br>0.0258  | 0.769,<br>0.2048,<br>3.4138,<br>0.0246 | 0.958,<br>0.4515,<br>2.6366,<br>0.0234 | 0.996,<br>0.6053,<br>3.2164,<br>0.0272 | 0.995,<br>0.8674,<br>4.8518,<br>0.0311 |
| MR-RAPS3           | 0.947,<br>-0.1950,<br>0.8378,<br>0.1869 | 0.931,<br>-0.0634,<br>0.4513,<br>0.0268 | 0.923,<br>-0.0266,<br>0.4709,<br>0.0366 | 0.939,<br>0.0233,<br>0.4192,<br>0.0267  | 0.939,<br>0.0436,<br>0.4097,<br>0.0269  | 0.935,<br>0.0649,<br>0.4030,<br>0.0475 | 0.915,<br>0.1013,<br>0.3925,<br>0.0231 | 0.920,<br>0.1335,<br>0.4270,<br>0.0352 | 0.935,<br>0.2275,<br>0.3409,<br>0.0199 |
| MR-RAPS4           | 1.000,<br>0.1360,<br>1.3740,<br>0.0222  | 1.000,<br>0.2449,<br>1.3457,<br>0.0199  | 0.992,<br>0.2399,<br>1.2422,<br>0.0189  | 0.956,<br>0.2792,<br>1.2027,<br>0.0177  | 0.948,<br>0.2848,<br>1.2068,<br>0.0177  | 0.941,<br>0.2876,<br>1.2341,<br>0.0198 | 0.990,<br>0.3457,<br>1.2200,<br>0.0182 | 1.000,<br>0.3862,<br>1.2230,<br>0.0184 | 1.000,<br>0.5011,<br>1.2763,<br>0.0185 |

Table S62: Main simulations: in each cell, from top to bottom are empirical type-I error/power, mean( $\hat{\theta}$ ), SD( $\hat{\theta}$ ), mean(SE( $\hat{\theta}$ )) when  $m = 20$ , the InSIDE violated,  $q = 0.4$ , and  $n = 50000$ .

| Methods \ $\theta$ | -0.1                                      | -0.05                                     | -0.03                                   | -0.01                                     | 0                                         | 0.01                                        | 0.03                                     | 0.05                                       | 0.1                                      |
|--------------------|-------------------------------------------|-------------------------------------------|-----------------------------------------|-------------------------------------------|-------------------------------------------|---------------------------------------------|------------------------------------------|--------------------------------------------|------------------------------------------|
| cML-MA-AIC         | 0.855,<br>-0.0875,<br>0.0272,<br>0.0283   | 0.295,<br>-0.0394,<br>0.0254,<br>0.028    | 0.109,<br>-0.0221,<br>0.0235,<br>0.0277 | 0.027,<br>-0.0067,<br>0.0223,<br>0.0276   | 0.019,<br>0.0005,<br>0.0225,<br>0.0277    | 0.031,<br>0.0080,<br>0.0229,<br>0.0279      | 0.105,<br>0.0232,<br>0.0250,<br>0.0285   | 0.287,<br>0.0404,<br>0.0274,<br>0.0292     | 0.785,<br>0.0873,<br>0.0311,<br>0.0308   |
| cML-MA-AIC-Profile | 0.853,<br>-0.0878,<br>0.0274,<br>0.0284   | 0.293,<br>-0.0395,<br>0.0254,<br>0.0282   | 0.102,<br>-0.0221,<br>0.0236,<br>0.0279 | 0.027,<br>-0.0067,<br>0.0223,<br>0.0278   | 0.019,<br>0.0005,<br>0.0225,<br>0.0279    | 0.029,<br>0.0080,<br>0.0229,<br>0.0281      | 0.101,<br>0.0233,<br>0.0251,<br>0.0287   | 0.287,<br>0.0404,<br>0.0274,<br>0.0294     | 0.783,<br>0.0874,<br>0.0312,<br>0.031    |
| cML-AIC            | 0.939,<br>-0.0941,<br>0.0296,<br>0.0234   | 0.498,<br>-0.0449,<br>0.0291,<br>0.0238   | 0.242,<br>-0.0260,<br>0.0286,<br>0.024  | 0.098,<br>-0.0082,<br>0.0278,<br>0.0243   | 0.076,<br>0.0006,<br>0.0278,<br>0.0244    | 0.100,<br>0.0092,<br>0.0281,<br>0.0245      | 0.248,<br>0.0268,<br>0.0295,<br>0.0247   | 0.477,<br>0.0454,<br>0.0309,<br>0.025      | 0.893,<br>0.0940,<br>0.0333,<br>0.0257   |
| cML-AIC-Profile    | 0.938,<br>-0.0943,<br>0.0297,<br>0.0235   | 0.490,<br>-0.0449,<br>0.0291,<br>0.024    | 0.240,<br>-0.0260,<br>0.0280,<br>0.0242 | 0.096,<br>-0.0082,<br>0.0278,<br>0.0244   | 0.075,<br>0.0006,<br>0.0278,<br>0.0245    | 0.097,<br>0.0092,<br>0.0281,<br>0.0247      | 0.242,<br>0.0268,<br>0.0295,<br>0.0249   | 0.471,<br>0.0455,<br>0.0310,<br>0.0252     | 0.893,<br>0.0940,<br>0.0334,<br>0.0259   |
| cML-MA-BIC         | 0.992,<br>-0.0995,<br>0.0217,<br>0.0218   | 0.624,<br>-0.0495,<br>0.0220,<br>0.0222   | 0.249,<br>-0.0295,<br>0.0222,<br>0.0224 | 0.066,<br>-0.0096,<br>0.0223,<br>0.0226   | 0.045,<br>0.0003,<br>0.0224,<br>0.0227    | 0.067,<br>0.0103,<br>0.0226,<br>0.0228      | 0.242,<br>0.0302,<br>0.0228,<br>0.023    | 0.593,<br>0.0502,<br>0.0231,<br>0.0233     | 0.987,<br>0.1001,<br>0.0239,<br>0.0239   |
| cML-MA-BIC-Profile | 0.992,<br>-0.0995,<br>0.0217,<br>0.0219   | 0.622,<br>-0.0495,<br>0.0220,<br>0.0223   | 0.248,<br>-0.0295,<br>0.0222,<br>0.0225 | 0.066,<br>-0.0096,<br>0.0223,<br>0.0227   | 0.045,<br>0.0003,<br>0.0224,<br>0.0228    | 0.067,<br>0.0103,<br>0.0226,<br>0.0229      | 0.242,<br>0.0302,<br>0.0228,<br>0.0231   | 0.590,<br>0.0502,<br>0.0231,<br>0.0233     | 0.987,<br>0.1001,<br>0.0239,<br>0.024    |
| cML-BIC            | 0.992,<br>-0.0996,<br>0.0216,<br>0.0215   | 0.638,<br>-0.0497,<br>0.0220,<br>0.0219   | 0.257,<br>-0.0297,<br>0.0221,<br>0.0221 | 0.072,<br>-0.0096,<br>0.0223,<br>0.0223   | 0.048,<br>0.0003,<br>0.0224,<br>0.0224    | 0.071,<br>0.0103,<br>0.0225,<br>0.0225      | 0.246,<br>0.0303,<br>0.0228,<br>0.0227   | 0.605,<br>0.0503,<br>0.0231,<br>0.023      | 0.990,<br>0.1003,<br>0.0239,<br>0.0236   |
| cML-BIC-Profile    | 0.992,<br>-0.0996,<br>0.0216,<br>0.0216   | 0.633,<br>-0.0497,<br>0.0220,<br>0.022    | 0.257,<br>-0.0297,<br>0.0221,<br>0.0222 | 0.071,<br>-0.0096,<br>0.0223,<br>0.0224   | 0.046,<br>0.0003,<br>0.0224,<br>0.0225    | 0.071,<br>0.0103,<br>0.0225,<br>0.0226      | 0.244,<br>0.0303,<br>0.0228,<br>0.0228   | 0.597,<br>0.0503,<br>0.0231,<br>0.023      | 0.990,<br>0.1003,<br>0.0239,<br>0.0237   |
| MR-Mix             | 0.943,<br>-0.1034,<br>0.0248,<br>0.0307   | 0.396,<br>-0.0505,<br>0.0248,<br>0.0303   | 0.136,<br>-0.0299,<br>0.0248,<br>0.0301 | 0.025,<br>-0.0097,<br>0.0247,<br>0.0301   | 0.022,<br>0.0002,<br>0.0247,<br>0.0301    | 0.036,<br>0.0101,<br>0.0247,<br>0.0301      | 0.131,<br>0.0295,<br>0.0248,<br>0.0304   | 0.334,<br>0.0484,<br>0.0248,<br>0.0304     | 0.910,<br>0.0944,<br>0.0248,<br>0.0302   |
| MR-ContMix         | 0.993,<br>-0.0992,<br>0.0227,<br>NA       | 0.632,<br>-0.0494,<br>0.0229,<br>NA       | 0.276,<br>-0.0296,<br>0.0231,<br>NA     | 0.079,<br>-0.0096,<br>0.0233,<br>NA       | 0.056,<br>0.0003,<br>0.0234,<br>NA        | 0.083,<br>0.0102,<br>0.0235,<br>NA          | 0.270,<br>0.0301,<br>0.0238,<br>NA       | 0.603,<br>0.0499,<br>0.0241,<br>NA         | 0.984,<br>0.0996,<br>0.0250,<br>NA       |
| MR-Lasso           | 0.989,<br>-0.0992,<br>0.0222,<br>0.0228   | 0.600,<br>-0.0495,<br>0.0226,<br>0.0232   | 0.237,<br>-0.0297,<br>0.0229,<br>0.0234 | 0.061,<br>-0.0098,<br>0.0230,<br>0.0236   | 0.042,<br>0.0001,<br>0.0231,<br>0.0237    | 0.069,<br>0.0101,<br>0.0233,<br>0.0239      | 0.231,<br>0.0300,<br>0.0236,<br>0.0241   | 0.548,<br>0.0499,<br>0.0238,<br>0.0243     | 0.971,<br>0.0994,<br>0.0247,<br>0.025    |
| MR-PRESSO          | 0.727,<br>-0.0733,<br>0.1774,<br>0.0515   | 0.477,<br>-0.0278,<br>0.1750,<br>0.0496   | 0.333,<br>-0.0082,<br>0.1748,<br>0.0494 | 0.249,<br>0.0109,<br>0.1728,<br>0.0486    | 0.240,<br>0.0200,<br>0.1721,<br>0.0483    | 0.255,<br>0.0290,<br>0.1713,<br>0.0482      | 0.355,<br>0.0480,<br>0.1703,<br>0.0478   | 0.511,<br>0.0670,<br>0.1686,<br>0.0473     | 0.777,<br>0.1140,<br>0.1629,<br>0.0455   |
| MR-IVW             | 0.086,<br>-0.0690,<br>0.2407,<br>0.2341   | 0.069,<br>-0.0188,<br>0.2407,<br>0.234    | 0.068,<br>0.0012,<br>0.2407,<br>0.234   | 0.066,<br>0.0213,<br>0.2408,<br>0.234     | 0.067,<br>0.0313,<br>0.2408,<br>0.234     | 0.067,<br>0.0413,<br>0.2408,<br>0.234       | 0.076,<br>0.0614,<br>0.2408,<br>0.234    | 0.080,<br>0.0814,<br>0.2408,<br>0.234      | 0.108,<br>0.1315,<br>0.2408,<br>0.234    |
| MR-IVW-Oracle      | 0.989,<br>-0.0991,<br>0.0215,<br>0.0229   | 0.593,<br>-0.0494,<br>0.0218,<br>0.0233   | 0.225,<br>-0.0295,<br>0.0220,<br>0.0235 | 0.057,<br>-0.0096,<br>0.0222,<br>0.0237   | 0.038,<br>0.0003,<br>0.0223,<br>0.0238    | 0.060,<br>0.0103,<br>0.0224,<br>0.024       | 0.226,<br>0.0302,<br>0.0226,<br>0.0242   | 0.541,<br>0.0500,<br>0.0229,<br>0.0244     | 0.977,<br>0.0998,<br>0.0236,<br>0.0251   |
| MR-Egger           | 0.206,<br>0.5169,<br>1.0543,<br>0.7834    | 0.212,<br>0.5640,<br>1.0541,<br>0.7835    | 0.213,<br>0.5828,<br>1.0541,<br>0.7835  | 0.221,<br>0.6016,<br>1.0541,<br>0.7836    | 0.222,<br>0.6110,<br>1.0540,<br>0.7836    | 0.222,<br>0.6204,<br>1.0540,<br>0.7837      | 0.224,<br>0.6392,<br>1.0539,<br>0.7837   | 0.229,<br>0.6580,<br>1.0539,<br>0.7838     | 0.250,<br>0.7050,<br>1.0539,<br>0.784    |
| MR-Weighted-Median | 0.922,<br>-0.1010,<br>0.0297,<br>0.0297   | 0.444,<br>-0.0534,<br>0.0307,<br>0.0302   | 0.203,<br>-0.0343,<br>0.0311,<br>0.0305 | 0.079,<br>-0.0154,<br>0.0317,<br>0.0307   | 0.060,<br>-0.0059,<br>0.0320,<br>0.0309   | 0.053,<br>0.0036,<br>0.0323,<br>0.031       | 0.129,<br>0.0227,<br>0.0328,<br>0.0313   | 0.272,<br>0.0418,<br>0.0333,<br>0.0317     | 0.786,<br>0.0894,<br>0.0349,<br>0.0326   |
| MR-Weighted-Mode   | 0.932,<br>-0.1023,<br>0.1260,<br>0.0497   | 0.410,<br>-0.0534,<br>0.1259,<br>0.0502   | 0.149,<br>-0.0323,<br>0.1286,<br>0.0505 | 0.037,<br>-0.0130,<br>0.1285,<br>0.0507   | 0.025,<br>-0.0033,<br>0.1284,<br>0.0507   | 0.042,<br>0.0065,<br>0.1283,<br>0.0509      | 0.152,<br>0.0258,<br>0.1282,<br>0.0512   | 0.383,<br>0.0454,<br>0.1280,<br>0.0515     | 0.901,<br>0.0945,<br>0.1276,<br>0.0526   |
| MR-RAPS1           | 0.083,<br>-0.0692,<br>0.2329,<br>0.2292   | 0.067,<br>-0.0191,<br>0.2330,<br>0.2292   | 0.068,<br>0.0009,<br>0.2330,<br>0.2292  | 0.068,<br>0.0209,<br>0.2330,<br>0.2292    | 0.065,<br>0.0309,<br>0.2330,<br>0.2292    | 0.064,<br>0.0409,<br>0.2330,<br>0.2292      | 0.072,<br>0.0610,<br>0.2331,<br>0.2292   | 0.081,<br>0.0810,<br>0.2331,<br>0.2292     | 0.106,<br>0.1310,<br>0.2332,<br>0.2293   |
| MR-RAPS2           | 0.082,<br>-0.0864,<br>0.2243,<br>0.2299   | 0.058,<br>-0.0379,<br>0.2284,<br>0.2308   | 0.060,<br>-0.0177,<br>0.2281,<br>0.2305 | 0.060,<br>0.0042,<br>0.2283,<br>0.2306    | 0.059,<br>0.0124,<br>0.2288,<br>0.2309    | 0.060,<br>0.0234,<br>0.2300,<br>0.2314      | 0.066,<br>0.0412,<br>0.2357,<br>0.2305   | 0.073,<br>0.0626,<br>0.2298,<br>0.231      | 0.088,<br>0.1148,<br>0.2285,<br>0.2312   |
| MR-RAPS3           | 0.896,<br>-0.5866,<br>21.0060,<br>62.3479 | 0.895,<br>-1.1754,<br>34.1200,<br>83.9749 | 0.890,<br>0.1021,<br>11.9450,<br>8.2491 | 0.897,<br>-2.1821,<br>65.0454,<br>156.102 | 0.895,<br>2.4716,<br>58.1470,<br>216.8516 | 0.890,<br>-3.1800,<br>102.3099,<br>716.7582 | 0.899,<br>0.3914,<br>9.2434,<br>6.128    | 0.896,<br>-0.0317,<br>50.8193,<br>85.8968  | 0.895,<br>0.8791,<br>12.6109,<br>12.2244 |
| MR-RAPS4           | 0.989,<br>-0.0482,<br>6.6462,<br>0.387    | 0.974,<br>-0.2519,<br>11.6099,<br>0.3825  | 0.974,<br>-0.1746,<br>9.5661,<br>0.2742 | 0.911,<br>-0.0919,<br>9.2975,<br>0.2694   | 0.906,<br>-0.1390,<br>9.0784,<br>0.2925   | 0.907,<br>-0.0308,<br>9.6594,<br>0.4394     | 0.929,<br>-0.2430,<br>10.4690,<br>0.5783 | 0.969,<br>-1.2295,<br>47.9748,<br>201.0763 | 0.998,<br>-0.0585,<br>5.2586,<br>0.3555  |

Table S63: Main simulations: in each cell, from top to bottom are empirical type-I error/power, mean( $\hat{\theta}$ ), SD( $\hat{\theta}$ ), mean(SE( $\hat{\theta}$ )) when  $m = 20$ , the InSIDE violated,  $q = 0.4$ , and  $n = 100000$ .

| Methods \ $\theta$ | -0.1                                       | -0.05                                   | -0.03                                    | -0.01                                     | 0                                        | 0.01                                     | 0.03                                    | 0.05                                     | 0.1                                    |
|--------------------|--------------------------------------------|-----------------------------------------|------------------------------------------|-------------------------------------------|------------------------------------------|------------------------------------------|-----------------------------------------|------------------------------------------|----------------------------------------|
| cML-MA-AIC         | 0.979,<br>-0.0914,<br>0.0203,<br>0.0198    | 0.569,<br>-0.0419,<br>0.0200,<br>0.0199 | 0.209,<br>-0.0235,<br>0.0185,<br>0.0197  | 0.050,<br>-0.0071,<br>0.0169,<br>0.0195   | 0.036,<br>0.0002,<br>0.0165,<br>0.0195   | 0.044,<br>0.0077,<br>0.0169,<br>0.0197   | 0.217,<br>0.0238,<br>0.0191,<br>0.0203  | 0.525,<br>0.0421,<br>0.0208,<br>0.0209   | 0.948,<br>0.0908,<br>0.0228,<br>0.0219 |
| cML-MA-AIC-Profile | 0.979,<br>-0.0915,<br>0.0204,<br>0.0199    | 0.568,<br>-0.0419,<br>0.0200,<br>0.0199 | 0.208,<br>-0.0235,<br>0.0185,<br>0.0197  | 0.048,<br>-0.0071,<br>0.0169,<br>0.0196   | 0.035,<br>0.0002,<br>0.0165,<br>0.0196   | 0.044,<br>0.0077,<br>0.0169,<br>0.0197   | 0.216,<br>0.0239,<br>0.0191,<br>0.0204  | 0.523,<br>0.0422,<br>0.0209,<br>0.021    | 0.948,<br>0.0910,<br>0.0229,<br>0.022  |
| cML-AIC            | 0.992,<br>-0.0958,<br>0.0219,<br>0.0165    | 0.733,<br>-0.0458,<br>0.0213,<br>0.0168 | 0.391,<br>-0.0265,<br>0.0213,<br>0.017   | 0.140,<br>-0.0082,<br>0.0209,<br>0.0172   | 0.101,<br>0.0001,<br>0.0207,<br>0.0172   | 0.139,<br>0.0089,<br>0.0207,<br>0.0173   | 0.399,<br>0.0269,<br>0.0222,<br>0.0175  | 0.708,<br>0.0463,<br>0.0232,<br>0.0177   | 0.975,<br>0.0954,<br>0.0247,<br>0.0181 |
| cML-AIC-Profile    | 0.992,<br>-0.0959,<br>0.0217,<br>0.0166    | 0.732,<br>-0.0458,<br>0.0219,<br>0.0169 | 0.389,<br>-0.0265,<br>0.0213,<br>0.017   | 0.140,<br>-0.0082,<br>0.0209,<br>0.0172   | 0.100,<br>0.0002,<br>0.0208,<br>0.0173   | 0.137,<br>0.0089,<br>0.0207,<br>0.0173   | 0.396,<br>0.0269,<br>0.0223,<br>0.0175  | 0.707,<br>0.0463,<br>0.0232,<br>0.0177   | 0.975,<br>0.0956,<br>0.0248,<br>0.0182 |
| cML-MA-BIC         | 1.000,<br>-0.0998,<br>0.0156,<br>0.0154    | 0.884,<br>-0.0498,<br>0.0159,<br>0.0156 | 0.476,<br>-0.0298,<br>0.0160,<br>0.0158  | 0.098,<br>-0.0098,<br>0.0161,<br>0.0159   | 0.058,<br>0.0002,<br>0.0162,<br>0.016    | 0.099,<br>0.0101,<br>0.0163,<br>0.016    | 0.467,<br>0.0301,<br>0.0165,<br>0.0162  | 0.857,<br>0.0501,<br>0.0167,<br>0.0164   | 1.000,<br>0.1001,<br>0.0173,<br>0.0168 |
| cML-MA-BIC-Profile | 1.000,<br>-0.0998,<br>0.0156,<br>0.0154    | 0.882,<br>-0.0498,<br>0.0159,<br>0.0157 | 0.470,<br>-0.0298,<br>0.0160,<br>0.0158  | 0.098,<br>-0.0098,<br>0.0161,<br>0.0159   | 0.058,<br>0.0002,<br>0.0162,<br>0.016    | 0.096,<br>0.0101,<br>0.0163,<br>0.0161   | 0.463,<br>0.0301,<br>0.0165,<br>0.0162  | 0.857,<br>0.0501,<br>0.0167,<br>0.0164   | 1.000,<br>0.1002,<br>0.0173,<br>0.0169 |
| cML-BIC            | 1.000,<br>-0.0999,<br>0.0156,<br>0.0152    | 0.889,<br>-0.0499,<br>0.0159,<br>0.0155 | 0.485,<br>-0.0299,<br>0.0160,<br>0.0156  | 0.105,<br>-0.0098,<br>0.0162,<br>0.0157   | 0.062,<br>0.0002,<br>0.0163,<br>0.0158   | 0.101,<br>0.0102,<br>0.0164,<br>0.0159   | 0.475,<br>0.0302,<br>0.0165,<br>0.016   | 0.865,<br>0.0502,<br>0.0167,<br>0.0162   | 1.000,<br>0.1002,<br>0.0174,<br>0.0167 |
| cML-BIC-Profile    | 1.000,<br>-0.0999,<br>0.0156,<br>0.0152    | 0.887,<br>-0.0499,<br>0.0159,<br>0.0155 | 0.485,<br>-0.0299,<br>0.0160,<br>0.0156  | 0.105,<br>-0.0098,<br>0.0162,<br>0.0158   | 0.061,<br>0.0002,<br>0.0163,<br>0.0158   | 0.099,<br>0.0102,<br>0.0164,<br>0.0159   | 0.473,<br>0.0302,<br>0.0165,<br>0.0161  | 0.863,<br>0.0502,<br>0.0167,<br>0.0162   | 1.000,<br>0.1002,<br>0.0174,<br>0.0167 |
| MR-Mix             | 0.994,<br>-0.1039,<br>0.0188,<br>0.0225    | 0.662,<br>-0.0508,<br>0.0188,<br>0.0224 | 0.243,<br>-0.0302,<br>0.0188,<br>0.0224  | 0.055,<br>-0.0100,<br>0.0188,<br>0.0224   | 0.028,<br>-0.0001,<br>0.0189,<br>0.0224  | 0.039,<br>0.0098,<br>0.0189,<br>0.0224   | 0.233,<br>0.0292,<br>0.0188,<br>0.0223  | 0.611,<br>0.0483,<br>0.0186,<br>0.0223   | 0.980,<br>0.0943,<br>0.0187,<br>0.0225 |
| MR-ContMix         | 1.000,<br>-0.0995,<br>0.0159,<br>NA        | 0.889,<br>-0.0497,<br>0.0163,<br>NA     | 0.506,<br>-0.0297,<br>0.0164,<br>NA      | 0.124,<br>-0.0097,<br>0.0166,<br>NA       | 0.071,<br>0.0003,<br>0.0167,<br>NA       | 0.120,<br>0.0103,<br>0.0168,<br>NA       | 0.490,<br>0.0302,<br>0.0170,<br>NA      | 0.874,<br>0.0502,<br>0.0171,<br>NA       | 1.000,<br>0.1000,<br>0.0177,<br>NA     |
| MR-Lasso           | 1.000,<br>-0.0997,<br>0.0157,<br>0.0162    | 0.853,<br>-0.0497,<br>0.0161,<br>0.0165 | 0.448,<br>-0.0299,<br>0.0163,<br>0.0166  | 0.091,<br>-0.0099,<br>0.0165,<br>0.0167   | 0.060,<br>0.0001,<br>0.0166,<br>0.0168   | 0.090,<br>0.0101,<br>0.0167,<br>0.0169   | 0.427,<br>0.0301,<br>0.0168,<br>0.0171  | 0.836,<br>0.0501,<br>0.0170,<br>0.0172   | 1.000,<br>0.0999,<br>0.0176,<br>0.0177 |
| MR-PRESSO          | 0.639,<br>-0.0397,<br>0.2136,<br>0.0829    | 0.488,<br>0.0083,<br>0.2132,<br>0.0812  | 0.338,<br>0.0265,<br>0.2127,<br>0.0795   | 0.224,<br>0.0457,<br>0.2119,<br>0.0778    | 0.216,<br>0.0556,<br>0.2117,<br>0.0776   | 0.260,<br>0.0656,<br>0.2118,<br>0.0776   | 0.410,<br>0.0855,<br>0.2107,<br>0.0764  | 0.565,<br>0.1050,<br>0.2102,<br>0.0756   | 0.738,<br>0.1534,<br>0.2091,<br>0.0741 |
| MR-IVW             | 0.082,<br>-0.0323,<br>0.2371,<br>0.2328    | 0.088,<br>0.0180,<br>0.2371,<br>0.2328  | 0.085,<br>0.0381,<br>0.2371,<br>0.2328   | 0.091,<br>0.0582,<br>0.2371,<br>0.2328    | 0.090,<br>0.0682,<br>0.2371,<br>0.2328   | 0.089,<br>0.0783,<br>0.2371,<br>0.2328   | 0.098,<br>0.0983,<br>0.2371,<br>0.2328  | 0.106,<br>0.1184,<br>0.2371,<br>0.2328   | 0.130,<br>0.1686,<br>0.2371,<br>0.2327 |
| MR-IVW-Oracle      | 1.000,<br>-0.0996,<br>0.0155,<br>0.0163    | 0.849,<br>-0.0498,<br>0.0158,<br>0.0166 | 0.438,<br>-0.0298,<br>0.0160,<br>0.0167  | 0.085,<br>-0.0098,<br>0.0161,<br>0.0169   | 0.053,<br>0.0001,<br>0.0162,<br>0.0169   | 0.084,<br>0.0101,<br>0.0163,<br>0.017    | 0.423,<br>0.0301,<br>0.0165,<br>0.0172  | 0.834,<br>0.0500,<br>0.0167,<br>0.0173   | 1.000,<br>0.0999,<br>0.0172,<br>0.0178 |
| MR-Egger           | 0.227,<br>0.5207,<br>1.1342,<br>0.8026     | 0.234,<br>0.5694,<br>1.1340,<br>0.8027  | 0.240,<br>0.5889,<br>1.1339,<br>0.8027   | 0.245,<br>0.6084,<br>1.1339,<br>0.8028    | 0.247,<br>0.6181,<br>1.1339,<br>0.8028   | 0.249,<br>0.6278,<br>1.1338,<br>0.8028   | 0.252,<br>0.6473,<br>1.1338,<br>0.8028  | 0.258,<br>0.6667,<br>1.1337,<br>0.8029   | 0.265,<br>0.7153,<br>1.1336,<br>0.8029 |
| MR-Weighted-Median | 0.997,<br>-0.1000,<br>0.0214,<br>0.021     | 0.678,<br>-0.0514,<br>0.0219,<br>0.0213 | 0.326,<br>-0.0318,<br>0.0222,<br>0.0215  | 0.091,<br>-0.0123,<br>0.0226,<br>0.0217   | 0.061,<br>-0.0026,<br>0.0228,<br>0.0218  | 0.075,<br>0.0072,<br>0.0229,<br>0.0219   | 0.248,<br>0.0266,<br>0.0233,<br>0.0221  | 0.548,<br>0.0460,<br>0.0237,<br>0.0224   | 0.973,<br>0.0945,<br>0.0248,<br>0.023  |
| MR-Weighted-Mode   | 0.989,<br>-0.0966,<br>0.0365,<br>0.0346    | 0.702,<br>-0.0473,<br>0.0364,<br>0.035  | 0.283,<br>-0.0271,<br>0.0361,<br>0.0351  | 0.058,<br>-0.0073,<br>0.0359,<br>0.0354   | 0.035,<br>0.0023,<br>0.0359,<br>0.0354   | 0.059,<br>0.0120,<br>0.0359,<br>0.0355   | 0.304,<br>0.0312,<br>0.0406,<br>0.0357  | 0.679,<br>0.0511,<br>0.0405,<br>0.0359   | 0.983,<br>0.0999,<br>0.0408,<br>0.0366 |
| MR-RAPS1           | 0.084,<br>-0.0360,<br>0.2307,<br>0.2271    | 0.083,<br>0.0141,<br>0.2307,<br>0.2271  | 0.089,<br>0.0341,<br>0.2307,<br>0.2271   | 0.089,<br>0.0541,<br>0.2307,<br>0.2271    | 0.087,<br>0.0641,<br>0.2308,<br>0.2271   | 0.086,<br>0.0741,<br>0.2308,<br>0.2271   | 0.092,<br>0.0941,<br>0.2308,<br>0.2271  | 0.097,<br>0.1141,<br>0.2308,<br>0.2271   | 0.132,<br>0.1642,<br>0.2308,<br>0.2272 |
| MR-RAPS2           | 0.142,<br>-0.0780,<br>0.2208,<br>0.2112    | 0.108,<br>-0.0258,<br>0.2251,<br>0.216  | 0.094,<br>-0.0058,<br>0.2236,<br>0.2167  | 0.089,<br>0.0172,<br>0.2229,<br>0.2177    | 0.086,<br>0.0273,<br>0.2267,<br>0.2188   | 0.092,<br>0.0381,<br>0.2275,<br>0.2199   | 0.090,<br>0.0613,<br>0.2304,<br>0.2213  | 0.088,<br>0.0833,<br>0.2283,<br>0.2233   | 0.110,<br>0.1333,<br>0.2289,<br>0.2225 |
| MR-RAPS3           | 0.933,<br>-2.3384,<br>70.7258,<br>191.3771 | 0.924,<br>0.3391,<br>10.2598,<br>5.3413 | 0.921,<br>1.6787,<br>27.3294,<br>32.6694 | 0.913,<br>0.6886,<br>41.4050,<br>104.7941 | 0.910,<br>1.1393,<br>22.0445,<br>29.3033 | 0.906,<br>1.7040,<br>18.2553,<br>17.7291 | 0.915,<br>-0.0513,<br>9.0579,<br>3.8172 | 0.920,<br>0.4360,<br>11.9486,<br>11.6837 | 0.929,<br>0.3862,<br>7.3367,<br>3.6125 |
| MR-RAPS4           | 0.984,<br>0.2999,<br>9.8559,<br>0.517      | 0.986,<br>0.4626,<br>7.5855,<br>0.1915  | 0.970,<br>0.7042,<br>9.4893,<br>0.1727   | 0.940,<br>0.6981,<br>10.1499,<br>0.1708   | 0.929,<br>0.4933,<br>7.5349,<br>0.1882   | 0.938,<br>0.6048,<br>8.7619,<br>0.3101   | 0.954,<br>0.3249,<br>2.5576,<br>0.1281  | 0.991,<br>0.3620,<br>2.5130,<br>0.1438   | 0.993,<br>0.3066,<br>2.0239,<br>0.0938 |

Table S64: Main simulations: in each cell, from top to bottom are empirical type-I error/power, mean( $\hat{\theta}$ ), SD( $\hat{\theta}$ ), mean(SE( $\hat{\theta}$ )) when  $m = 20$ , the InSIDE violated,  $q = 0.4$ , and  $n = 200000$ .

| Methods \ $\theta$ | -0.1                                        | -0.05                                       | -0.03                                    | -0.01                                    | 0                                         | 0.01                                          | 0.03                                    | 0.05                                   | 0.1                                     |
|--------------------|---------------------------------------------|---------------------------------------------|------------------------------------------|------------------------------------------|-------------------------------------------|-----------------------------------------------|-----------------------------------------|----------------------------------------|-----------------------------------------|
| cML-MA-AIC         | 0.997,<br>-0.0936,<br>0.0145,<br>0.0142     | 0.836,<br>-0.0438,<br>0.0145,<br>0.0143     | 0.418,<br>-0.0245,<br>0.0138,<br>0.0141  | 0.069,<br>-0.0073,<br>0.0121,<br>0.0138  | 0.024,<br>0.0002,<br>0.0117,<br>0.0138    | 0.068,<br>0.0078,<br>0.0121,<br>0.014         | 0.410,<br>0.0248,<br>0.0141,<br>0.0145  | 0.815,<br>0.0440,<br>0.0152,<br>0.015  | 0.997,<br>0.0934,<br>0.0161,<br>0.0155  |
| cML-MA-AIC-Profile | 0.998,<br>-0.0937,<br>0.0145,<br>0.0142     | 0.836,<br>-0.0438,<br>0.0146,<br>0.0143     | 0.417,<br>-0.0245,<br>0.0138,<br>0.0142  | 0.066,<br>-0.0073,<br>0.0120,<br>0.0138  | 0.024,<br>0.0002,<br>0.0117,<br>0.0138    | 0.067,<br>0.0078,<br>0.0121,<br>0.014         | 0.409,<br>0.0248,<br>0.0141,<br>0.0146  | 0.815,<br>0.0440,<br>0.0152,<br>0.015  | 0.997,<br>0.0936,<br>0.0162,<br>0.0155  |
| cML-AIC            | 1.000,<br>-0.0970,<br>0.0151,<br>0.0117     | 0.922,<br>-0.0468,<br>0.0155,<br>0.0119     | 0.610,<br>-0.0271,<br>0.0154,<br>0.012   | 0.164,<br>-0.0083,<br>0.0146,<br>0.0121  | 0.102,<br>0.0004,<br>0.0146,<br>0.0122    | 0.161,<br>0.0090,<br>0.0147,<br>0.0122        | 0.605,<br>0.0275,<br>0.0159,<br>0.0123  | 0.908,<br>0.0472,<br>0.0164,<br>0.0125 | 0.999,<br>0.0968,<br>0.0172,<br>0.0128  |
| cML-AIC-Profile    | 1.000,<br>-0.0970,<br>0.0151,<br>0.0117     | 0.922,<br>-0.0469,<br>0.0155,<br>0.0119     | 0.610,<br>-0.0271,<br>0.0154,<br>0.012   | 0.163,<br>-0.0083,<br>0.0146,<br>0.0121  | 0.101,<br>0.0004,<br>0.0146,<br>0.0122    | 0.160,<br>0.0090,<br>0.0147,<br>0.0122        | 0.605,<br>0.0275,<br>0.0159,<br>0.0124  | 0.907,<br>0.0472,<br>0.0164,<br>0.0125 | 0.999,<br>0.0968,<br>0.0173,<br>0.0129  |
| cML-MA-BIC         | 1.000,<br>-0.1000,<br>0.0108,<br>0.0108     | 0.996,<br>-0.0500,<br>0.0110,<br>0.011      | 0.775,<br>-0.0300,<br>0.0111,<br>0.0111  | 0.144,<br>-0.0100,<br>0.0111,<br>0.0112  | 0.051,<br>0.0000,<br>0.0112,<br>0.0113    | 0.140,<br>0.0099,<br>0.0112,<br>0.0113        | 0.751,<br>0.0299,<br>0.0114,<br>0.0114  | 0.989,<br>0.0499,<br>0.0115,<br>0.0116 | 1.000,<br>0.0999,<br>0.0118,<br>0.0119  |
| cML-MA-BIC-Profile | 1.000,<br>-0.1000,<br>0.0108,<br>0.0108     | 0.996,<br>-0.0500,<br>0.0110,<br>0.011      | 0.775,<br>-0.0300,<br>0.0111,<br>0.0112  | 0.144,<br>-0.0100,<br>0.0112,<br>0.0113  | 0.051,<br>0.0000,<br>0.0112,<br>0.0113    | 0.138,<br>0.0099,<br>0.0112,<br>0.0113        | 0.751,<br>0.0299,<br>0.0114,<br>0.0114  | 0.989,<br>0.0499,<br>0.0115,<br>0.0116 | 1.000,<br>0.0999,<br>0.0118,<br>0.0119  |
| cML-BIC            | 1.000,<br>-0.1000,<br>0.0108,<br>0.0107     | 0.997,<br>-0.0500,<br>0.0110,<br>0.0109     | 0.780,<br>-0.0300,<br>0.0110,<br>0.011   | 0.148,<br>-0.0101,<br>0.0111,<br>0.0111  | 0.052,<br>-0.0001,<br>0.0112,<br>0.0112   | 0.146,<br>0.0099,<br>0.0112,<br>0.0112        | 0.758,<br>0.0299,<br>0.0113,<br>0.0113  | 0.990,<br>0.0499,<br>0.0115,<br>0.0115 | 1.000,<br>0.0999,<br>0.0118,<br>0.0118  |
| cML-BIC-Profile    | 1.000,<br>-0.1000,<br>0.0108,<br>0.0108     | 0.997,<br>-0.0500,<br>0.0110,<br>0.0109     | 0.779,<br>-0.0300,<br>0.0110,<br>0.011   | 0.147,<br>-0.0101,<br>0.0111,<br>0.0112  | 0.052,<br>-0.0001,<br>0.0112,<br>0.0112   | 0.145,<br>0.0099,<br>0.0112,<br>0.0112        | 0.758,<br>0.0299,<br>0.0113,<br>0.0113  | 0.990,<br>0.0499,<br>0.0115,<br>0.0115 | 1.000,<br>0.0999,<br>0.0118,<br>0.0118  |
| MR-Mix             | 0.999,<br>-0.1041,<br>0.0131,<br>0.0164     | 0.914,<br>-0.0509,<br>0.0131,<br>0.0163     | 0.476,<br>-0.0303,<br>0.0129,<br>0.0164  | 0.064,<br>-0.0102,<br>0.0129,<br>0.0163  | 0.016,<br>-0.0002,<br>0.0128,<br>0.0163   | 0.057,<br>0.0098,<br>0.0128,<br>0.0163        | 0.455,<br>0.0292,<br>0.0129,<br>0.0163  | 0.878,<br>0.0483,<br>0.0130,<br>0.0163 | 0.996,<br>0.0944,<br>0.0130,<br>0.0167  |
| MR-ContMix         | 1.000,<br>-0.0999,<br>0.0110,<br>NA         | 0.995,<br>-0.0500,<br>0.0113,<br>NA         | 0.793,<br>-0.0300,<br>0.0114,<br>NA      | 0.164,<br>-0.0101,<br>0.0114,<br>NA      | 0.072,<br>-0.0001,<br>0.0115,<br>NA       | 0.168,<br>0.0099,<br>0.0116,<br>NA            | 0.770,<br>0.0299,<br>0.0117,<br>NA      | 0.987,<br>0.0498,<br>0.0118,<br>NA     | 1.000,<br>0.0997,<br>0.0121,<br>NA      |
| MR-Lasso           | 1.000,<br>-0.0998,<br>0.0112,<br>0.0115     | 0.986,<br>-0.0499,<br>0.0114,<br>0.0117     | 0.733,<br>-0.0299,<br>0.0115,<br>0.0118  | 0.130,<br>-0.0100,<br>0.0115,<br>0.0119  | 0.047,<br>0.0000,<br>0.0115,<br>0.0119    | 0.126,<br>0.0099,<br>0.0116,<br>0.012         | 0.704,<br>0.0299,<br>0.0116,<br>0.0121  | 0.978,<br>0.0499,<br>0.0118,<br>0.0122 | 0.999,<br>0.0997,<br>0.0121,<br>0.0126  |
| MR-PRESSO          | 0.537,<br>-0.0499,<br>0.2349,<br>0.1138     | 0.459,<br>-0.0003,<br>0.2349,<br>0.113      | 0.354,<br>0.0192,<br>0.2348,<br>0.1122   | 0.219,<br>0.0394,<br>0.2347,<br>0.112    | 0.200,<br>0.0490,<br>0.2347,<br>0.1117    | 0.233,<br>0.0589,<br>0.2346,<br>0.1115        | 0.402,<br>0.0786,<br>0.2341,<br>0.1101  | 0.498,<br>0.0984,<br>0.2337,<br>0.1089 | 0.608,<br>0.1473,<br>0.2329,<br>0.1056  |
| MR-IVW             | 0.091,<br>-0.0465,<br>0.2446,<br>0.234      | 0.086,<br>0.0038,<br>0.2445,<br>0.234       | 0.087,<br>0.0239,<br>0.2445,<br>0.234    | 0.085,<br>0.0440,<br>0.2444,<br>0.234    | 0.082,<br>0.0541,<br>0.2444,<br>0.234     | 0.079,<br>0.0642,<br>0.2444,<br>0.2339        | 0.090,<br>0.0843,<br>0.2444,<br>0.2339  | 0.095,<br>0.1043,<br>0.2443,<br>0.2339 | 0.116,<br>0.1546,<br>0.2443,<br>0.2339  |
| MR-IVW-Oracle      | 1.000,<br>-0.0999,<br>0.0107,<br>0.0115     | 0.990,<br>-0.0499,<br>0.0109,<br>0.0117     | 0.732,<br>-0.0300,<br>0.0110,<br>0.0118  | 0.122,<br>-0.0100,<br>0.0111,<br>0.0119  | 0.042,<br>0.0000,<br>0.0111,<br>0.012     | 0.120,<br>0.0100,<br>0.0112,<br>0.012         | 0.703,<br>0.0299,<br>0.0113,<br>0.0122  | 0.982,<br>0.0499,<br>0.0114,<br>0.0123 | 1.000,<br>0.0998,<br>0.0117,<br>0.0126  |
| MR-Egger           | 0.254,<br>0.5503,<br>1.1351,<br>0.7866      | 0.258,<br>0.5997,<br>1.1350,<br>0.7865      | 0.258,<br>0.6194,<br>1.1350,<br>0.7865   | 0.265,<br>0.6391,<br>1.1350,<br>0.7865   | 0.267,<br>0.6490,<br>1.1350,<br>0.7865    | 0.272,<br>0.6588,<br>1.1350,<br>0.7865        | 0.272,<br>0.6785,<br>1.1350,<br>0.7865  | 0.278,<br>0.6982,<br>1.1350,<br>0.7865 | 0.289,<br>0.7474,<br>1.1350,<br>0.7865  |
| MR-Weighted-Median | 1.000,<br>-0.1005,<br>0.0153,<br>0.0148     | 0.927,<br>-0.0514,<br>0.0157,<br>0.0151     | 0.543,<br>-0.0318,<br>0.0159,<br>0.0152  | 0.133,<br>-0.0121,<br>0.0163,<br>0.0153  | 0.062,<br>-0.0023,<br>0.0165,<br>0.0154   | 0.079,<br>0.0074,<br>0.0167,<br>0.0155        | 0.434,<br>0.0270,<br>0.0171,<br>0.0156  | 0.832,<br>0.0466,<br>0.0177,<br>0.0158 | 0.996,<br>0.0954,<br>0.0191,<br>0.0163  |
| MR-Weighted-Mode   | 0.990,<br>-0.0992,<br>0.0158,<br>0.0157     | 0.919,<br>-0.0493,<br>0.0157,<br>0.0159     | 0.530,<br>-0.0296,<br>0.0159,<br>0.016   | 0.094,<br>-0.0096,<br>0.0160,<br>0.0161  | 0.037,<br>0.0004,<br>0.0160,<br>0.0161    | 0.085,<br>0.0102,<br>0.0159,<br>0.0162        | 0.515,<br>0.0301,<br>0.0159,<br>0.0163  | 0.901,<br>0.0497,<br>0.0160,<br>0.0165 | 0.992,<br>0.0996,<br>0.0162,<br>0.0168  |
| MR-RAPS1           | 0.094,<br>-0.0472,<br>0.2392,<br>0.228      | 0.092,<br>0.0028,<br>0.2391,<br>0.228       | 0.086,<br>0.0228,<br>0.2391,<br>0.228    | 0.084,<br>0.0428,<br>0.2391,<br>0.228    | 0.077,<br>0.0528,<br>0.2391,<br>0.228     | 0.084,<br>0.0628,<br>0.2391,<br>0.228         | 0.092,<br>0.0828,<br>0.2391,<br>0.228   | 0.100,<br>0.1028,<br>0.2391,<br>0.228  | 0.125,<br>0.1528,<br>0.2390,<br>0.228   |
| MR-RAPS2           | 0.284,<br>-0.1275,<br>0.1607,<br>0.136      | 0.177,<br>-0.0790,<br>0.1635,<br>0.137      | 0.136,<br>-0.0575,<br>0.1710,<br>0.1386  | 0.095,<br>-0.0431,<br>0.1589,<br>0.1374  | 0.082,<br>-0.0327,<br>0.1597,<br>0.1378   | 0.078,<br>-0.0206,<br>0.1602,<br>0.1373       | 0.065,<br>-0.0012,<br>0.1626,<br>0.137  | 0.063,<br>0.0160,<br>0.1605,<br>0.1354 | 0.103,<br>0.0688,<br>0.1729,<br>0.1418  |
| MR-RAPS3           | 0.932,<br>-4.5043,<br>133.2929,<br>459.1634 | 0.930,<br>-2.8573,<br>108.8086,<br>278.2873 | 0.926,<br>0.2790,<br>20.2050,<br>12.2365 | 0.944,<br>0.2108,<br>44.2770,<br>83.1364 | 0.951,<br>-0.6234,<br>19.5964,<br>11.7936 | 0.955,<br>-11.2173,<br>378.1344,<br>6799.6057 | 0.954,<br>1.1095,<br>15.8975,<br>8.7751 | 0.950,<br>0.2982,<br>9.1370,<br>4.4133 | 0.947,<br>0.3811,<br>11.3200,<br>4.5942 |
| MR-RAPS4           | 0.990,<br>0.0360,<br>2.5810,<br>0.1226      | 0.993,<br>0.0936,<br>2.5583,<br>0.1412      | 0.986,<br>0.1421,<br>2.6249,<br>0.159    | 0.960,<br>0.1405,<br>2.6864,<br>0.1629   | 0.946,<br>0.1670,<br>2.6504,<br>0.114     | 0.955,<br>0.1783,<br>2.6050,<br>0.4293        | 0.993,<br>0.2380,<br>2.5032,<br>0.1101  | 0.999,<br>0.2547,<br>2.5032,<br>0.0807 | 0.998,<br>0.3534,<br>2.3370,<br>0.0701  |

Table S65: Main simulations: in each cell, from top to bottom are empirical type-I error/power, mean( $\hat{\theta}$ ), SD( $\hat{\theta}$ ), mean(SE( $\hat{\theta}$ )) when  $m = 20$ , the InSIDE violated,  $q = 0.6$ , and  $n = 50000$ .

| Methods \ $\theta$ | -0.1                                      | -0.05                                     | -0.03                                       | -0.01                                    | 0                                            | 0.01                                      | 0.03                                       | 0.05                                         | 0.1                                        |
|--------------------|-------------------------------------------|-------------------------------------------|---------------------------------------------|------------------------------------------|----------------------------------------------|-------------------------------------------|--------------------------------------------|----------------------------------------------|--------------------------------------------|
| cML-MA-AIC         | 0.621,<br>-0.0822,<br>0.0340,<br>0.0363   | 0.170,<br>-0.0372,<br>0.0302,<br>0.0357   | 0.060,<br>-0.0215,<br>0.0282,<br>0.0355     | 0.023,<br>-0.0072,<br>0.0265,<br>0.0354  | 0.016,<br>-0.0005,<br>0.0259,<br>0.0354      | 0.010,<br>0.0064,<br>0.0263,<br>0.0356    | 0.049,<br>0.0203,<br>0.0279,<br>0.0364     | 0.138,<br>0.0360,<br>0.0304,<br>0.0373       | 0.557,<br>0.0799,<br>0.0359,<br>0.0396     |
| cML-MA-AIC-Profile | 0.618,<br>-0.0823,<br>0.0342,<br>0.0365   | 0.170,<br>-0.0372,<br>0.0302,<br>0.0359   | 0.059,<br>-0.0215,<br>0.0282,<br>0.0357     | 0.022,<br>-0.0072,<br>0.0265,<br>0.0356  | 0.016,<br>-0.0005,<br>0.0259,<br>0.0356      | 0.010,<br>0.0064,<br>0.0263,<br>0.0358    | 0.047,<br>0.0203,<br>0.0279,<br>0.0367     | 0.136,<br>0.0360,<br>0.0304,<br>0.0375       | 0.554,<br>0.0801,<br>0.0360,<br>0.0399     |
| cML-AIC            | 0.811,<br>-0.0907,<br>0.0375,<br>0.0293   | 0.361,<br>-0.0429,<br>0.0346,<br>0.03     | 0.178,<br>-0.0258,<br>0.0346,<br>0.0302     | 0.080,<br>-0.0084,<br>0.0343,<br>0.0305  | 0.073,<br>-0.0008,<br>0.0337,<br>0.0305      | 0.076,<br>0.0078,<br>0.0339,<br>0.0307    | 0.157,<br>0.0237,<br>0.0360,<br>0.0311     | 0.331,<br>0.0410,<br>0.0379,<br>0.0315       | 0.750,<br>0.0875,<br>0.0412,<br>0.0323     |
| cML-AIC-Profile    | 0.806,<br>-0.0909,<br>0.0377,<br>0.0295   | 0.356,<br>-0.0429,<br>0.0359,<br>0.0302   | 0.173,<br>-0.0258,<br>0.0346,<br>0.0304     | 0.080,<br>-0.0084,<br>0.0343,<br>0.0307  | 0.071,<br>-0.0007,<br>0.0338,<br>0.0307      | 0.075,<br>0.0078,<br>0.0339,<br>0.0309    | 0.156,<br>0.0237,<br>0.0360,<br>0.0313     | 0.326,<br>0.0410,<br>0.0379,<br>0.0317       | 0.745,<br>0.0876,<br>0.0413,<br>0.0325     |
| cML-MA-BIC         | 0.957,<br>-0.1000,<br>0.0265,<br>0.0274   | 0.435,<br>-0.0500,<br>0.0270,<br>0.0279   | 0.194,<br>-0.0301,<br>0.0271,<br>0.0281     | 0.063,<br>-0.0102,<br>0.0273,<br>0.0284  | 0.037,<br>-0.0002,<br>0.0274,<br>0.0285      | 0.053,<br>0.0097,<br>0.0275,<br>0.0286    | 0.165,<br>0.0296,<br>0.0279,<br>0.0289     | 0.401,<br>0.0496,<br>0.0282,<br>0.0292       | 0.917,<br>0.0296,<br>0.0291,<br>0.03       |
| cML-MA-BIC-Profile | 0.955,<br>-0.1000,<br>0.0265,<br>0.0276   | 0.433,<br>-0.0500,<br>0.0271,<br>0.028    | 0.193,<br>-0.0301,<br>0.0271,<br>0.0283     | 0.063,<br>-0.0102,<br>0.0273,<br>0.0285  | 0.036,<br>-0.0002,<br>0.0274,<br>0.0286      | 0.052,<br>0.0097,<br>0.0275,<br>0.0288    | 0.164,<br>0.0296,<br>0.0279,<br>0.029      | 0.399,<br>0.0496,<br>0.0282,<br>0.0293       | 0.916,<br>0.0296,<br>0.0291,<br>0.0301     |
| cML-BIC            | 0.957,<br>-0.1002,<br>0.0266,<br>0.0271   | 0.446,<br>-0.0502,<br>0.0272,<br>0.0275   | 0.200,<br>-0.0302,<br>0.0274,<br>0.0277     | 0.065,<br>-0.0102,<br>0.0277,<br>0.028   | 0.042,<br>-0.0002,<br>0.0277,<br>0.0281      | 0.060,<br>0.0098,<br>0.0279,<br>0.0282    | 0.180,<br>0.0298,<br>0.0281,<br>0.0285     | 0.423,<br>0.0498,<br>0.0284,<br>0.0288       | 0.922,<br>0.0998,<br>0.0292,<br>0.0296     |
| cML-BIC-Profile    | 0.953,<br>-0.1002,<br>0.0266,<br>0.0272   | 0.442,<br>-0.0502,<br>0.0272,<br>0.0276   | 0.199,<br>-0.0302,<br>0.0274,<br>0.0278     | 0.065,<br>-0.0102,<br>0.0277,<br>0.0281  | 0.039,<br>-0.0002,<br>0.0277,<br>0.0282      | 0.059,<br>0.0098,<br>0.0279,<br>0.0283    | 0.178,<br>0.0298,<br>0.0281,<br>0.0286     | 0.419,<br>0.0498,<br>0.0284,<br>0.0289       | 0.921,<br>0.0998,<br>0.0292,<br>0.0297     |
| MR-Mix             | 0.869,<br>-0.1021,<br>0.0287,<br>0.0339   | 0.335,<br>-0.0503,<br>0.0286,<br>0.0338   | 0.140,<br>-0.0301,<br>0.0285,<br>0.034      | 0.038,<br>-0.0102,<br>0.0284,<br>0.0337  | 0.023,<br>-0.0004,<br>0.0284,<br>0.0335      | 0.040,<br>0.0094,<br>0.0285,<br>0.0335    | 0.110,<br>0.0286,<br>0.0284,<br>0.0334     | 0.292,<br>0.0472,<br>0.0286,<br>0.0334       | 0.816,<br>0.0925,<br>0.0286,<br>0.0336     |
| MR-ContMix         | 0.957,<br>-0.0996,<br>0.0275,<br>NA       | 0.477,<br>-0.0499,<br>0.0279,<br>NA       | 0.229,<br>-0.0300,<br>0.0281,<br>NA         | 0.079,<br>-0.0102,<br>0.0283,<br>NA      | 0.061,<br>-0.0002,<br>0.0284,<br>NA          | 0.077,<br>0.0097,<br>0.0286,<br>NA        | 0.209,<br>0.0296,<br>0.0288,<br>NA         | 0.440,<br>0.0495,<br>0.0291,<br>NA           | 0.920,<br>0.0994,<br>0.0302,<br>NA         |
| MR-Lasso           | 0.908,<br>-0.0774,<br>0.2046,<br>0.035    | 0.417,<br>-0.0273,<br>0.2045,<br>0.0356   | 0.218,<br>-0.0074,<br>0.2045,<br>0.0359     | 0.099,<br>0.0127,<br>0.2046,<br>0.0361   | 0.081,<br>0.0226,<br>0.2046,<br>0.0363       | 0.086,<br>0.0327,<br>0.2049,<br>0.0364    | 0.176,<br>0.0521,<br>0.2036,<br>0.037      | 0.357,<br>0.0722,<br>0.2052,<br>0.0382       | 0.854,<br>0.1223,<br>0.2062,<br>0.0387     |
| MR-PRESSO          | 0.545,<br>-0.0251,<br>0.2518,<br>0.0918   | 0.302,<br>0.0216,<br>0.2505,<br>0.0896    | 0.209,<br>0.0397,<br>0.2501,<br>0.0888      | 0.173,<br>0.0577,<br>0.2490,<br>0.0871   | 0.170,<br>0.0659,<br>0.2482,<br>0.086        | 0.185,<br>0.0743,<br>0.2473,<br>0.0848    | 0.259,<br>0.0936,<br>0.2469,<br>0.0842     | 0.349,<br>0.1131,<br>0.2465,<br>0.0834       | 0.627,<br>0.1596,<br>0.2440,<br>0.0816     |
| MR-IVW             | 0.072,<br>-0.0121,<br>0.2894,<br>0.2801   | 0.074,<br>0.0382,<br>0.2895,<br>0.2801    | 0.075,<br>0.0583,<br>0.2895,<br>0.2801      | 0.080,<br>0.0784,<br>0.2895,<br>0.2801   | 0.083,<br>0.0885,<br>0.2895,<br>0.2801       | 0.082,<br>0.0985,<br>0.2895,<br>0.2801    | 0.093,<br>0.1186,<br>0.2895,<br>0.2801     | 0.098,<br>0.1387,<br>0.2895,<br>0.2801       | 0.117,<br>0.1889,<br>0.2896,<br>0.2801     |
| MR-IVW-Oracle      | 0.922,<br>-0.0996,<br>0.0261,<br>0.0296   | 0.386,<br>-0.0499,<br>0.0265,<br>0.0301   | 0.171,<br>-0.0300,<br>0.0268,<br>0.0304     | 0.048,<br>-0.0101,<br>0.0270,<br>0.0306  | 0.033,<br>-0.0001,<br>0.0271,<br>0.0308      | 0.043,<br>0.0098,<br>0.0273,<br>0.0309    | 0.134,<br>0.0297,<br>0.0276,<br>0.0312     | 0.346,<br>0.0496,<br>0.0279,<br>0.0315       | 0.881,<br>0.0994,<br>0.0287,<br>0.0323     |
| MR-Egger           | 0.185,<br>0.5815,<br>1.0311,<br>0.8485    | 0.187,<br>0.6295,<br>1.0311,<br>0.8486    | 0.192,<br>0.6487,<br>1.0311,<br>0.8486      | 0.194,<br>0.6678,<br>1.0311,<br>0.8487   | 0.196,<br>0.6774,<br>1.0311,<br>0.8487       | 0.199,<br>0.6870,<br>1.0311,<br>0.8487    | 0.200,<br>0.7062,<br>1.0311,<br>0.8488     | 0.203,<br>0.7253,<br>1.0311,<br>0.8488       | 0.219,<br>0.7731,<br>1.0311,<br>0.849      |
| MR-Weighted-Median | 0.791,<br>-0.1045,<br>0.0564,<br>0.0375   | 0.385,<br>-0.0593,<br>0.0572,<br>0.0383   | 0.219,<br>-0.0415,<br>0.0582,<br>0.0386     | 0.139,<br>-0.0237,<br>0.0600,<br>0.039   | 0.117,<br>-0.0148,<br>0.0608,<br>0.0392      | 0.098,<br>-0.0059,<br>0.0617,<br>0.0394   | 0.133,<br>0.0117,<br>0.0642,<br>0.0399     | 0.203,<br>0.0292,<br>0.0668,<br>0.0404       | 0.530,<br>0.0727,<br>0.0748,<br>0.0417     |
| MR-Weighted-Mode   | 0.784,<br>-0.1529,<br>0.1378,<br>0.0419   | 0.718,<br>-0.1164,<br>0.1377,<br>0.0421   | 0.690,<br>-0.1020,<br>0.1391,<br>0.0422     | 0.678,<br>-0.0869,<br>0.1402,<br>0.0423  | 0.676,<br>-0.0799,<br>0.1411,<br>0.0423      | 0.665,<br>-0.0724,<br>0.1419,<br>0.0424   | 0.657,<br>-0.0583,<br>0.1440,<br>0.0426    | 0.645,<br>-0.0441,<br>0.1448,<br>0.0429      | 0.625,<br>-0.0085,<br>0.1488,<br>0.0436    |
| MR-RAPS1           | 0.084,<br>-0.0149,<br>0.2856,<br>0.2745   | 0.081,<br>0.0352,<br>0.2857,<br>0.2746    | 0.081,<br>0.0552,<br>0.2857,<br>0.2746      | 0.085,<br>0.0752,<br>0.2857,<br>0.2746   | 0.084,<br>0.0852,<br>0.2857,<br>0.2746       | 0.086,<br>0.0952,<br>0.2857,<br>0.2746    | 0.092,<br>0.1153,<br>0.2857,<br>0.2746     | 0.095,<br>0.1353,<br>0.2858,<br>0.2746       | 0.113,<br>0.1853,<br>0.2858,<br>0.2747     |
| MR-RAPS2           | 0.096,<br>-0.0232,<br>0.3100,<br>0.2948   | 0.086,<br>0.0260,<br>0.3104,<br>0.2943    | 0.080,<br>0.0469,<br>0.3095,<br>0.2949      | 0.080,<br>0.0658,<br>0.3109,<br>0.2946   | 0.085,<br>0.0778,<br>0.3104,<br>0.2947       | 0.086,<br>0.0875,<br>0.3115,<br>0.2947    | 0.090,<br>0.1071,<br>0.3123,<br>0.2949     | 0.094,<br>0.1234,<br>0.3102,<br>0.2936       | 0.110,<br>0.1778,<br>0.3106,<br>0.2951     |
| MR-RAPS3           | 0.895,<br>-0.3470,<br>49.8288,<br>77.0998 | 0.887,<br>0.9905,<br>66.5783,<br>112.6095 | 0.887,<br>-3.5865,<br>163.6478,<br>892.9504 | 0.896,<br>-0.4220,<br>35.3251,<br>53.739 | 0.889,<br>10.5151,<br>220.5876,<br>1339.5784 | 0.899,<br>0.5375,<br>97.1229,<br>306.5017 | 0.894,<br>-0.1168,<br>67.8534,<br>199.5718 | 0.898,<br>-6.1403,<br>197.4045,<br>2342.1774 | 0.897,<br>-2.8103,<br>115.7327,<br>743.884 |
| MR-RAPS4           | 0.980,<br>0.1889,<br>7.6805,<br>0.4358    | 0.989,<br>0.4083,<br>6.9236,<br>0.4146    | 0.976,<br>0.7528,<br>12.1329,<br>3.9274     | 0.976,<br>0.4197,<br>6.4050,<br>1.3158   | 0.971,<br>0.4936,<br>6.7366,<br>0.8431       | 0.978,<br>0.4496,<br>6.6832,<br>1.5008    | 0.980,<br>0.5948,<br>6.5416,<br>0.3948     | 0.979,<br>1.0834,<br>14.7072,<br>155.2634    | 0.986,<br>0.5394,<br>4.3552,<br>0.3186     |

Table S66: Main simulations: in each cell, from top to bottom are empirical type-I error/power, mean( $\hat{\theta}$ ), SD( $\hat{\theta}$ ), mean(SE( $\hat{\theta}$ )) when  $m = 20$ , the InSIDE violated,  $q = 0.6$ , and  $n = 100000$ .

| Methods \ $\theta$ | -0.1                                       | -0.05                                     | -0.03                                       | -0.01                                     | 0                                        | 0.01                                      | 0.03                                      | 0.05                                     | 0.1                                     |
|--------------------|--------------------------------------------|-------------------------------------------|---------------------------------------------|-------------------------------------------|------------------------------------------|-------------------------------------------|-------------------------------------------|------------------------------------------|-----------------------------------------|
| cML-MA-AIC         | 0.885,<br>-0.0874,<br>0.0250,<br>0.0258    | 0.351,<br>-0.0391,<br>0.0231,<br>0.0254   | 0.118,<br>-0.0217,<br>0.0212,<br>0.025      | 0.033,<br>-0.0066,<br>0.0192,<br>0.0248   | 0.020,<br>0.0006,<br>0.0188,<br>0.0248   | 0.025,<br>0.0075,<br>0.0191,<br>0.025     | 0.114,<br>0.0227,<br>0.0212,<br>0.0257    | 0.327,<br>0.0396,<br>0.0237,<br>0.0266   | 0.865,<br>0.0876,<br>0.0263,<br>0.028   |
| cML-MA-AIC-Profile | 0.884,<br>-0.0875,<br>0.0251,<br>0.0258    | 0.352,<br>-0.0391,<br>0.0232,<br>0.0255   | 0.116,<br>-0.0217,<br>0.0212,<br>0.0251     | 0.032,<br>-0.0066,<br>0.0191,<br>0.0249   | 0.020,<br>0.0006,<br>0.0188,<br>0.0249   | 0.024,<br>0.0075,<br>0.0191,<br>0.0251    | 0.113,<br>0.0227,<br>0.0212,<br>0.0258    | 0.327,<br>0.0396,<br>0.0237,<br>0.0267   | 0.863,<br>0.0877,<br>0.0264,<br>0.0281  |
| cML-AIC            | 0.949,<br>-0.0932,<br>0.0273,<br>0.0207    | 0.564,<br>-0.0437,<br>0.0263,<br>0.0211   | 0.275,<br>-0.0255,<br>0.0251,<br>0.0212     | 0.097,<br>-0.0076,<br>0.0241,<br>0.0214   | 0.080,<br>0.0009,<br>0.0241,<br>0.0215   | 0.093,<br>0.0093,<br>0.0239,<br>0.0215    | 0.280,<br>0.0262,<br>0.0256,<br>0.0217    | 0.562,<br>0.0450,<br>0.0271,<br>0.022    | 0.938,<br>0.0940,<br>0.0289,<br>0.0226  |
| cML-AIC-Profile    | 0.949,<br>-0.0934,<br>0.0273,<br>0.0208    | 0.562,<br>-0.0437,<br>0.0263,<br>0.0211   | 0.273,<br>-0.0255,<br>0.0251,<br>0.0213     | 0.095,<br>-0.0076,<br>0.0241,<br>0.0215   | 0.078,<br>0.0009,<br>0.0241,<br>0.0215   | 0.091,<br>0.0093,<br>0.0239,<br>0.0216    | 0.279,<br>0.0262,<br>0.0256,<br>0.0218    | 0.557,<br>0.0450,<br>0.0271,<br>0.022    | 0.938,<br>0.0941,<br>0.0290,<br>0.0227  |
| cML-MA-BIC         | 0.999,<br>-0.0996,<br>0.0195,<br>0.0193    | 0.700,<br>-0.0495,<br>0.0198,<br>0.0196   | 0.330,<br>-0.0295,<br>0.0199,<br>0.0198     | 0.078,<br>-0.0095,<br>0.0201,<br>0.0199   | 0.051,<br>0.0004,<br>0.0201,<br>0.02     | 0.086,<br>0.0104,<br>0.0202,<br>0.0201    | 0.332,<br>0.0304,<br>0.0204,<br>0.0203    | 0.695,<br>0.0504,<br>0.0207,<br>0.0205   | 0.997,<br>0.1005,<br>0.0212,<br>0.0211  |
| cML-MA-BIC-Profile | 0.999,<br>-0.0996,<br>0.0195,<br>0.0193    | 0.700,<br>-0.0495,<br>0.0198,<br>0.0197   | 0.329,<br>-0.0295,<br>0.0199,<br>0.0198     | 0.075,<br>-0.0095,<br>0.0201,<br>0.02     | 0.050,<br>0.0004,<br>0.0201,<br>0.0201   | 0.086,<br>0.0104,<br>0.0202,<br>0.0202    | 0.331,<br>0.0304,<br>0.0204,<br>0.0203    | 0.692,<br>0.0504,<br>0.0207,<br>0.0206   | 0.997,<br>0.1005,<br>0.0212,<br>0.0211  |
| cML-BIC            | 0.999,<br>-0.0996,<br>0.0195,<br>0.0191    | 0.711,<br>-0.0496,<br>0.0198,<br>0.0194   | 0.338,<br>-0.0296,<br>0.0199,<br>0.0196     | 0.080,<br>-0.0096,<br>0.0201,<br>0.0197   | 0.055,<br>0.0004,<br>0.0202,<br>0.0198   | 0.091,<br>0.0105,<br>0.0203,<br>0.0199    | 0.342,<br>0.0305,<br>0.0205,<br>0.0201    | 0.703,<br>0.0505,<br>0.0207,<br>0.0203   | 0.997,<br>0.1005,<br>0.0212,<br>0.0209  |
| cML-BIC-Profile    | 0.999,<br>-0.0996,<br>0.0195,<br>0.0191    | 0.710,<br>-0.0496,<br>0.0198,<br>0.0194   | 0.335,<br>-0.0296,<br>0.0199,<br>0.0196     | 0.080,<br>-0.0096,<br>0.0201,<br>0.0198   | 0.055,<br>0.0004,<br>0.0202,<br>0.0198   | 0.091,<br>0.0105,<br>0.0203,<br>0.0199    | 0.341,<br>0.0305,<br>0.0205,<br>0.0201    | 0.700,<br>0.0505,<br>0.0207,<br>0.0203   | 0.997,<br>0.1005,<br>0.0212,<br>0.0209  |
| MR-Mix             | 0.982,<br>-0.1016,<br>0.0212,<br>0.0242    | 0.564,<br>-0.0495,<br>0.0212,<br>0.0242   | 0.232,<br>-0.0292,<br>0.0210,<br>0.0243     | 0.042,<br>-0.0093,<br>0.0209,<br>0.0245   | 0.022,<br>0.0004,<br>0.0209,<br>0.0244   | 0.048,<br>0.0100,<br>0.0210,<br>0.0245    | 0.211,<br>0.0292,<br>0.0210,<br>0.0248    | 0.544,<br>0.0482,<br>0.0211,<br>0.0246   | 0.955,<br>0.0933,<br>0.0213,<br>0.0246  |
| MR-ContMix         | 0.998,<br>-0.0994,<br>0.0198,<br>NA        | 0.731,<br>-0.0495,<br>0.0201,<br>NA       | 0.367,<br>-0.0296,<br>0.0202,<br>NA         | 0.098,<br>-0.0096,<br>0.0205,<br>NA       | 0.072,<br>0.0004,<br>0.0205,<br>NA       | 0.106,<br>0.0104,<br>0.0206,<br>NA        | 0.373,<br>0.0304,<br>0.0207,<br>NA        | 0.716,<br>0.0504,<br>0.0210,<br>NA       | 0.997,<br>0.1003,<br>0.0216,<br>NA      |
| MR-Lasso           | 0.984,<br>-0.0953,<br>0.1476,<br>0.0237    | 0.653,<br>-0.0455,<br>0.1465,<br>0.0243   | 0.302,<br>-0.0252,<br>0.1469,<br>0.0245     | 0.095,<br>-0.0042,<br>0.1502,<br>0.025    | 0.079,<br>0.0058,<br>0.1506,<br>0.0251   | 0.101,<br>0.0158,<br>0.1506,<br>0.0252    | 0.315,<br>0.0357,<br>0.1505,<br>0.0251    | 0.646,<br>0.0558,<br>0.1503,<br>0.0254   | 0.976,<br>0.1059,<br>0.1509,<br>0.026   |
| MR-PRESSO          | 0.471,<br>-0.0309,<br>0.2713,<br>0.1347    | 0.319,<br>0.0183,<br>0.2705,<br>0.1324    | 0.210,<br>0.0378,<br>0.2704,<br>0.1312      | 0.157,<br>0.0579,<br>0.2704,<br>0.1312    | 0.154,<br>0.0680,<br>0.2702,<br>0.1311   | 0.173,<br>0.0779,<br>0.2702,<br>0.1309    | 0.250,<br>0.0971,<br>0.2692,<br>0.1293    | 0.378,<br>0.1166,<br>0.2692,<br>0.1277   | 0.572,<br>0.1649,<br>0.2676,<br>0.1228  |
| MR-IVW             | 0.062,<br>-0.0259,<br>0.2859,<br>0.2806    | 0.072,<br>0.0246,<br>0.2858,<br>0.2806    | 0.079,<br>0.0447,<br>0.2858,<br>0.2806      | 0.080,<br>0.0649,<br>0.2858,<br>0.2806    | 0.082,<br>0.0750,<br>0.2858,<br>0.2806   | 0.087,<br>0.0850,<br>0.2858,<br>0.2806    | 0.091,<br>0.1052,<br>0.2858,<br>0.2806    | 0.096,<br>0.1253,<br>0.2858,<br>0.2806   | 0.120,<br>0.1756,<br>0.2857,<br>0.2806  |
| MR-IVW-Oracle      | 0.998,<br>-0.0995,<br>0.0193,<br>0.0207    | 0.650,<br>-0.0495,<br>0.0196,<br>0.021    | 0.286,<br>-0.0296,<br>0.0198,<br>0.0212     | 0.066,<br>-0.0096,<br>0.0199,<br>0.0214   | 0.040,<br>0.0004,<br>0.0200,<br>0.0215   | 0.064,<br>0.0104,<br>0.0201,<br>0.0216    | 0.284,<br>0.0304,<br>0.0203,<br>0.0218    | 0.640,<br>0.0503,<br>0.0204,<br>0.022    | 0.992,<br>0.1002,<br>0.0210,<br>0.0226  |
| MR-Egger           | 0.178,<br>0.5209,<br>1.0486,<br>0.849      | 0.192,<br>0.5700,<br>1.0486,<br>0.8491    | 0.199,<br>0.5896,<br>1.0487,<br>0.8491      | 0.201,<br>0.6092,<br>1.0487,<br>0.8492    | 0.204,<br>0.6190,<br>1.0487,<br>0.8492   | 0.204,<br>0.6288,<br>1.0487,<br>0.8492    | 0.206,<br>0.6484,<br>1.0488,<br>0.8492    | 0.210,<br>0.6679,<br>1.0488,<br>0.8492   | 0.224,<br>0.7168,<br>1.0489,<br>0.8493  |
| MR-Weighted-Median | 0.957,<br>-0.1052,<br>0.0392,<br>0.0263    | 0.564,<br>-0.0587,<br>0.0432,<br>0.0268   | 0.314,<br>-0.0404,<br>0.0460,<br>0.0271     | 0.153,<br>-0.0220,<br>0.0485,<br>0.0274   | 0.115,<br>-0.0129,<br>0.0499,<br>0.0275  | 0.104,<br>-0.0037,<br>0.0510,<br>0.0277   | 0.181,<br>0.0142,<br>0.0544,<br>0.028     | 0.382,<br>0.0323,<br>0.0569,<br>0.0284   | 0.812,<br>0.0764,<br>0.0674,<br>0.0293  |
| MR-Weighted-Mode   | 0.866,<br>-0.1558,<br>0.1479,<br>0.0513    | 0.813,<br>-0.1189,<br>0.1488,<br>0.0514   | 0.784,<br>-0.1033,<br>0.1501,<br>0.0514     | 0.767,<br>-0.0890,<br>0.1505,<br>0.0515   | 0.766,<br>-0.0819,<br>0.1512,<br>0.0516  | 0.756,<br>-0.0740,<br>0.1516,<br>0.0517   | 0.743,<br>-0.0610,<br>0.1525,<br>0.0519   | 0.726,<br>-0.0461,<br>0.1536,<br>0.0521  | 0.729,<br>-0.0105,<br>0.1590,<br>0.0523 |
| MR-RAPS1           | 0.072,<br>-0.0241,<br>0.2779,<br>0.2739    | 0.072,<br>0.0259,<br>0.2779,<br>0.2739    | 0.075,<br>0.0459,<br>0.2779,<br>0.2739      | 0.078,<br>0.0660,<br>0.2779,<br>0.2739    | 0.077,<br>0.0760,<br>0.2779,<br>0.2739   | 0.079,<br>0.0860,<br>0.2779,<br>0.2739    | 0.085,<br>0.1060,<br>0.2779,<br>0.274     | 0.099,<br>0.1260,<br>0.2779,<br>0.274    | 0.118,<br>0.1760,<br>0.2779,<br>0.274   |
| MR-RAPS2           | 0.098,<br>-0.0333,<br>0.3180,<br>0.2915    | 0.088,<br>0.0105,<br>0.3091,<br>0.2915    | 0.094,<br>0.0282,<br>0.3075,<br>0.2909      | 0.096,<br>0.0470,<br>0.3073,<br>0.2911    | 0.091,<br>0.0566,<br>0.3081,<br>0.2917   | 0.099,<br>0.0701,<br>0.3136,<br>0.2901    | 0.098,<br>0.0894,<br>0.3120,<br>0.2906    | 0.101,<br>0.1141,<br>0.3116,<br>0.2919   | 0.119,<br>0.1613,<br>0.3073,<br>0.2915  |
| MR-RAPS3           | 0.926,<br>5.3303,<br>130.5940,<br>445.4344 | 0.922,<br>3.7135,<br>168.1767,<br>566.857 | 0.922,<br>-1.4269,<br>141.4856,<br>401.2783 | 0.909,<br>5.3399,<br>85.1299,<br>189.6383 | 0.909,<br>1.3724,<br>40.2535,<br>41.5834 | 0.916,<br>1.3301,<br>74.8899,<br>191.5282 | 0.928,<br>1.9973,<br>73.1478,<br>181.7078 | 0.931,<br>2.0407,<br>29.8844,<br>30.6823 | 0.939,<br>0.3029,<br>31.9163,<br>39.36  |
| MR-RAPS4           | 0.984,<br>0.1080,<br>12.4816,<br>0.5062    | 0.984,<br>0.6937,<br>10.4543,<br>115.5682 | 0.984,<br>0.7010,<br>11.1183,<br>0.4821     | 0.984,<br>0.7561,<br>11.5701,<br>0.5914   | 0.980,<br>0.9548,<br>15.3063,<br>0.7112  | 0.978,<br>0.7176,<br>9.5789,<br>0.4609    | 0.979,<br>0.4522,<br>8.1870,<br>0.3812    | 0.986,<br>0.4824,<br>8.1668,<br>0.3852   | 0.982,<br>0.4537,<br>2.7776,<br>0.2838  |



Table S67: Main simulations: in each cell, from top to bottom are empirical type-I error/power, mean( $\hat{\theta}$ ), SD( $\hat{\theta}$ ), mean(SE( $\hat{\theta}$ )) when  $m = 20$ , the InSIDE violated,  $q = 0.6$ , and  $n = 200000$ .

| Methods \ $\theta$ | -0.1                                      | -0.05                                    | -0.03                                   | -0.01                                    | 0                                       | 0.01                                    | 0.03                                    | 0.05                                     | 0.1                                      |
|--------------------|-------------------------------------------|------------------------------------------|-----------------------------------------|------------------------------------------|-----------------------------------------|-----------------------------------------|-----------------------------------------|------------------------------------------|------------------------------------------|
| cML-MA-AIC         | 0.979,<br>-0.0905,<br>0.0185,<br>0.0186   | 0.605,<br>-0.0409,<br>0.0180,<br>0.0186  | 0.235,<br>-0.0227,<br>0.0165,<br>0.0182 | 0.039,<br>-0.0071,<br>0.0141,<br>0.0178  | 0.022,<br>-0.0004,<br>0.0136,<br>0.0177 | 0.031,<br>0.0066,<br>0.0141,<br>0.0179  | 0.217,<br>0.0226,<br>0.0165,<br>0.0186  | 0.590,<br>0.0410,<br>0.0181,<br>0.0192   | 0.982,<br>0.0901,<br>0.0194,<br>0.02     |
| cML-MA-AIC-Profile | 0.979,<br>-0.0906,<br>0.0184,<br>0.0186   | 0.605,<br>-0.0409,<br>0.0180,<br>0.0186  | 0.234,<br>-0.0227,<br>0.0165,<br>0.0183 | 0.039,<br>-0.0071,<br>0.0141,<br>0.0178  | 0.021,<br>-0.0004,<br>0.0136,<br>0.0178 | 0.030,<br>0.0066,<br>0.0141,<br>0.0179  | 0.217,<br>0.0226,<br>0.0165,<br>0.0186  | 0.588,<br>0.0410,<br>0.0181,<br>0.0192   | 0.982,<br>0.0902,<br>0.0194,<br>0.0201   |
| cML-AIC            | 0.990,<br>-0.0950,<br>0.0199,<br>0.0147   | 0.807,<br>-0.0452,<br>0.0198,<br>0.015   | 0.467,<br>-0.0259,<br>0.0151            | 0.124,<br>-0.0085,<br>0.0174,<br>0.0152  | 0.079,<br>-0.0003,<br>0.0171,<br>0.0152 | 0.129,<br>0.0078,<br>0.0174,<br>0.0153  | 0.424,<br>0.0258,<br>0.0191,<br>0.0155  | 0.785,<br>0.0453,<br>0.0198,<br>0.0156   | 0.995,<br>0.0950,<br>0.0208,<br>0.0161   |
| cML-AIC-Profile    | 0.990,<br>-0.0952,<br>0.0199,<br>0.0148   | 0.808,<br>-0.0452,<br>0.0199,<br>0.015   | 0.464,<br>-0.0259,<br>0.0193,<br>0.0151 | 0.121,<br>-0.0085,<br>0.0174,<br>0.0152  | 0.079,<br>-0.0003,<br>0.0171,<br>0.0153 | 0.127,<br>0.0078,<br>0.0174,<br>0.0153  | 0.423,<br>0.0258,<br>0.0191,<br>0.0155  | 0.783,<br>0.0454,<br>0.0199,<br>0.0156   | 0.995,<br>0.0950,<br>0.0208,<br>0.0161   |
| cML-MA-BIC         | 1.000,<br>-0.0998,<br>0.0143,<br>0.0136   | 0.944,<br>-0.0498,<br>0.0145,<br>0.0139  | 0.567,<br>-0.0298,<br>0.0146,<br>0.014  | 0.122,<br>-0.0098,<br>0.0147,<br>0.0141  | 0.052,<br>0.0001,<br>0.0147,<br>0.0142  | 0.110,<br>0.0101,<br>0.0148,<br>0.0142  | 0.564,<br>0.0301,<br>0.0149,<br>0.0144  | 0.916,<br>0.0501,<br>0.0151,<br>0.0145   | 1.000,<br>0.1001,<br>0.0154,<br>0.0149   |
| cML-MA-BIC-Profile | 1.000,<br>-0.0998,<br>0.0143,<br>0.0137   | 0.944,<br>-0.0498,<br>0.0145,<br>0.0139  | 0.567,<br>-0.0298,<br>0.0146,<br>0.014  | 0.121,<br>-0.0098,<br>0.0147,<br>0.0141  | 0.052,<br>0.0001,<br>0.0147,<br>0.0142  | 0.110,<br>0.0101,<br>0.0148,<br>0.0142  | 0.564,<br>0.0301,<br>0.0149,<br>0.0144  | 0.916,<br>0.0501,<br>0.0151,<br>0.0145   | 1.000,<br>0.1001,<br>0.0154,<br>0.0149   |
| cML-BIC            | 1.000,<br>-0.0999,<br>0.0143,<br>0.0135   | 0.946,<br>-0.0499,<br>0.0145,<br>0.0138  | 0.573,<br>-0.0299,<br>0.0146,<br>0.0139 | 0.125,<br>-0.0098,<br>0.0147,<br>0.014   | 0.054,<br>0.0001,<br>0.0147,<br>0.014   | 0.115,<br>0.0101,<br>0.0148,<br>0.0141  | 0.572,<br>0.0301,<br>0.0149,<br>0.0142  | 0.919,<br>0.0502,<br>0.0150,<br>0.0144   | 1.000,<br>0.1002,<br>0.0154,<br>0.0148   |
| cML-BIC-Profile    | 1.000,<br>-0.0999,<br>0.0143,<br>0.0135   | 0.946,<br>-0.0499,<br>0.0145,<br>0.0138  | 0.573,<br>-0.0299,<br>0.0146,<br>0.0139 | 0.125,<br>-0.0098,<br>0.0147,<br>0.014   | 0.053,<br>0.0001,<br>0.0147,<br>0.014   | 0.113,<br>0.0101,<br>0.0148,<br>0.0141  | 0.570,<br>0.0301,<br>0.0149,<br>0.0143  | 0.919,<br>0.0502,<br>0.0150,<br>0.0144   | 1.000,<br>0.1002,<br>0.0154,<br>0.0148   |
| MR-Mix             | 0.993,<br>-0.1015,<br>0.0160,<br>0.0186   | 0.829,<br>-0.0496,<br>0.0157,<br>0.0185  | 0.398,<br>-0.0293,<br>0.0156,<br>0.0187 | 0.057,<br>-0.0095,<br>0.0156,<br>0.0184  | 0.030,<br>0.0003,<br>0.0155,<br>0.0185  | 0.077,<br>0.0100,<br>0.0157,<br>0.0184  | 0.389,<br>0.0290,<br>0.0157,<br>0.0184  | 0.793,<br>0.0478,<br>0.0155,<br>0.0181   | 0.992,<br>0.0932,<br>0.0159,<br>0.0185   |
| MR-ContMix         | 1.000,<br>-0.0998,<br>0.0147,<br>NA       | 0.953,<br>-0.0499,<br>0.0148,<br>NA      | 0.614,<br>-0.0299,<br>0.0148,<br>NA     | 0.158,<br>-0.0099,<br>0.0149,<br>NA      | 0.072,<br>0.0001,<br>0.0150,<br>NA      | 0.151,<br>0.0101,<br>0.0151,<br>NA      | 0.602,<br>0.0300,<br>0.0152,<br>NA      | 0.927,<br>0.0499,<br>0.0154,<br>NA       | 1.000,<br>0.0999,<br>0.0158,<br>NA       |
| MR-Lasso           | 0.996,<br>-0.0901,<br>0.1634,<br>0.0195   | 0.908,<br>-0.0401,<br>0.1635,<br>0.0197  | 0.516,<br>-0.0204,<br>0.1631,<br>0.0199 | 0.130,<br>-0.0001,<br>0.1644,<br>0.0199  | 0.072,<br>0.0099,<br>0.1644,<br>0.02    | 0.122,<br>0.0199,<br>0.1649,<br>0.0199  | 0.507,<br>0.0398,<br>0.1647,<br>0.02    | 0.869,<br>0.0598,<br>0.1647,<br>0.0202   | 0.988,<br>0.1099,<br>0.1647,<br>0.0206   |
| MR-PRESSO          | 0.414,<br>-0.0315,<br>0.2885,<br>0.1714   | 0.332,<br>0.0179,<br>0.2885,<br>0.1698   | 0.230,<br>0.0379,<br>0.2884,<br>0.1693  | 0.134,<br>0.0578,<br>0.2884,<br>0.1691   | 0.122,<br>0.0679,<br>0.2884,<br>0.1691  | 0.140,<br>0.0778,<br>0.2884,<br>0.1685  | 0.241,<br>0.0977,<br>0.2882,<br>0.1678  | 0.343,<br>0.1175,<br>0.2881,<br>0.1668   | 0.472,<br>0.1668,<br>0.2876,<br>0.1632   |
| MR-IVW             | 0.084,<br>-0.0302,<br>0.2936,<br>0.2806   | 0.083,<br>0.0203,<br>0.2936,<br>0.2805   | 0.079,<br>0.0405,<br>0.2936,<br>0.2805  | 0.079,<br>0.0607,<br>0.2935,<br>0.2805   | 0.078,<br>0.0708,<br>0.2935,<br>0.2805  | 0.079,<br>0.0808,<br>0.2935,<br>0.2805  | 0.088,<br>0.1010,<br>0.2935,<br>0.2805  | 0.096,<br>0.1212,<br>0.2935,<br>0.2805   | 0.124,<br>0.1715,<br>0.2935,<br>0.2804   |
| MR-IVW-Oracle      | 1.000,<br>-0.0998,<br>0.0142,<br>0.0147   | 0.915,<br>-0.0498,<br>0.0144,<br>0.015   | 0.505,<br>-0.0298,<br>0.0145,<br>0.0151 | 0.097,<br>-0.0099,<br>0.0146,<br>0.0152  | 0.039,<br>0.0001,<br>0.0147,<br>0.0153  | 0.092,<br>0.0101,<br>0.0147,<br>0.0154  | 0.507,<br>0.0301,<br>0.0148,<br>0.0155  | 0.892,<br>0.0501,<br>0.0150,<br>0.0157   | 1.000,<br>0.1000,<br>0.0154,<br>0.0161   |
| MR-Egger           | 0.178,<br>0.6026,<br>1.0480,<br>0.861     | 0.190,<br>0.6523,<br>1.0479,<br>0.861    | 0.195,<br>0.6722,<br>1.0479,<br>0.861   | 0.198,<br>0.6920,<br>1.0478,<br>0.861    | 0.201,<br>0.7019,<br>1.0478,<br>0.861   | 0.204,<br>0.7118,<br>1.0478,<br>0.861   | 0.211,<br>0.7316,<br>1.0477,<br>0.861   | 0.217,<br>0.7515,<br>1.0477,<br>0.861    | 0.224,<br>0.8009,<br>1.0476,<br>0.861    |
| MR-Weighted-Median | 0.996,<br>-0.1057,<br>0.0355,<br>0.0188   | 0.825,<br>-0.0585,<br>0.0423,<br>0.0191  | 0.489,<br>-0.0398,<br>0.0456,<br>0.0193 | 0.162,<br>-0.0212,<br>0.0491,<br>0.0195  | 0.118,<br>-0.0119,<br>0.0508,<br>0.0196 | 0.112,<br>-0.0026,<br>0.0526,<br>0.0197 | 0.302,<br>0.0158,<br>0.0562,<br>0.0199  | 0.600,<br>0.0342,<br>0.0596,<br>0.0201   | 0.941,<br>0.0800,<br>0.0668,<br>0.0209   |
| MR-Weighted-Mode   | 0.903,<br>-0.1554,<br>0.1328,<br>0.02     | 0.853,<br>-0.1182,<br>0.1342,<br>0.0201  | 0.827,<br>-0.1033,<br>0.1355,<br>0.0201 | 0.821,<br>-0.0881,<br>0.1365,<br>0.0202  | 0.818,<br>-0.0805,<br>0.1369,<br>0.0202 | 0.824,<br>-0.0731,<br>0.1374,<br>0.0202 | 0.811,<br>-0.0587,<br>0.1392,<br>0.0203 | 0.807,<br>-0.0439,<br>0.1404,<br>0.0204  | 0.792,<br>-0.0087,<br>0.1460,<br>0.0207  |
| MR-RAPS1           | 0.082,<br>-0.0314,<br>0.2870,<br>0.2733   | 0.077,<br>0.0186,<br>0.2870,<br>0.2733   | 0.084,<br>0.0387,<br>0.2870,<br>0.2733  | 0.085,<br>0.0587,<br>0.2870,<br>0.2733   | 0.091,<br>0.0687,<br>0.2870,<br>0.2733  | 0.091,<br>0.0787,<br>0.2870,<br>0.2733  | 0.093,<br>0.0987,<br>0.2870,<br>0.2733  | 0.105,<br>0.1187,<br>0.2870,<br>0.2733   | 0.128,<br>0.1687,<br>0.2870,<br>0.2733   |
| MR-RAPS2           | 0.336,<br>-0.1246,<br>0.4235,<br>0.192    | 0.263,<br>-0.0631,<br>0.3437,<br>0.1986  | 0.233,<br>-0.0415,<br>0.3206,<br>0.2012 | 0.208,<br>-0.0216,<br>0.3156,<br>0.2038  | 0.197,<br>-0.0147,<br>0.3100,<br>0.2053 | 0.188,<br>0.0027,<br>0.3270,<br>0.2067  | 0.172,<br>0.0271,<br>0.3306,<br>0.2081  | 0.151,<br>0.0403,<br>0.3146,<br>0.2138   | 0.149,<br>0.0989,<br>0.3201,<br>0.2239   |
| MR-RAPS3           | 0.951,<br>-37.8104,<br>941.3561,<br>10820 | 0.948,<br>-4.2250,<br>101.5375,<br>205.8 | 0.940,<br>-1.7704,<br>34.4377,<br>26.5  | 0.948,<br>-5.5316,<br>130.4426,<br>241.9 | 0.952,<br>4.7789,<br>55.2695,<br>38.82  | 0.956,<br>0.0180,<br>18.2874,<br>6.667  | 0.951,<br>0.6276,<br>97.0454,<br>205.2  | 0.947,<br>-4.7526,<br>147.4679,<br>499.1 | 0.949,<br>-16.3133,<br>508.2776,<br>6162 |
| MR-RAPS4           | 0.990,<br>-0.1036,<br>3.4325,<br>0.229    | 0.984,<br>-0.1812,<br>6.9522,<br>0.2887  | 0.980,<br>-0.1244,<br>7.6520,<br>0.4416 | 0.977,<br>-0.1260,<br>7.5668,<br>0.2581  | 0.981,<br>-0.1665,<br>7.7123,<br>0.2555 | 0.985,<br>-0.1443,<br>7.6815,<br>0.617  | 0.984,<br>-0.1504,<br>7.7571,<br>0.3567 | 0.987,<br>-0.0510,<br>7.2657,<br>0.2856  | 0.990,<br>-0.0178,<br>7.4870,<br>0.2188  |

Table S68: Main simulations: in each cell, from top to bottom are empirical type-I error/power, mean( $\hat{\theta}$ ), SD( $\hat{\theta}$ ), mean(SE( $\hat{\theta}$ )) when  $m = 100$ , the ideal case of  $q = 0$ , and  $n = 50000$ .

| Methods \ $\theta$ | -0.1                                    | -0.05                                   | -0.03                                   | -0.01                                   | 0                                       | 0.01                                   | 0.03                                   | 0.05                                   | 0.1                                    |
|--------------------|-----------------------------------------|-----------------------------------------|-----------------------------------------|-----------------------------------------|-----------------------------------------|----------------------------------------|----------------------------------------|----------------------------------------|----------------------------------------|
| cML-MA-AIC         | 1.000,<br>-0.0973,<br>0.0105,<br>0.0084 | 0.996,<br>-0.0478,<br>0.0107,<br>0.0085 | 0.841,<br>-0.0279,<br>0.0108,<br>0.0086 | 0.206,<br>-0.0085,<br>0.0102,<br>0.0086 | 0.099,<br>0.0006,<br>0.0100,<br>0.0086  | 0.241,<br>0.0097,<br>0.0104,<br>0.0087 | 0.846,<br>0.0290,<br>0.0112,<br>0.0089 | 0.991,<br>0.0489,<br>0.0114,<br>0.009  | 1.000,<br>0.0983,<br>0.0117,<br>0.0093 |
| cML-MA-AIC-Profile | 1.000,<br>-0.0980,<br>0.0106,<br>0.0085 | 0.996,<br>-0.0479,<br>0.0108,<br>0.0086 | 0.840,<br>-0.0279,<br>0.0108,<br>0.0087 | 0.204,<br>-0.0085,<br>0.0102,<br>0.0087 | 0.097,<br>0.0006,<br>0.0100,<br>0.0087  | 0.238,<br>0.0097,<br>0.0105,<br>0.0088 | 0.846,<br>0.0291,<br>0.0113,<br>0.0089 | 0.991,<br>0.0490,<br>0.0115,<br>0.0091 | 1.000,<br>0.0989,<br>0.0118,<br>0.0094 |
| cML-AIC            | 1.000,<br>-0.0985,<br>0.0109,<br>0.0077 | 0.998,<br>-0.0487,<br>0.0111,<br>0.0079 | 0.882,<br>-0.0287,<br>0.0111,<br>0.0079 | 0.280,<br>-0.0089,<br>0.0111,<br>0.008  | 0.156,<br>0.0007,<br>0.0110,<br>0.0081  | 0.325,<br>0.0103,<br>0.0113,<br>0.0081 | 0.887,<br>0.0300,<br>0.0116,<br>0.0082 | 0.997,<br>0.0499,<br>0.0117,<br>0.0083 | 1.000,<br>0.0995,<br>0.0121,<br>0.0085 |
| cML-AIC-Profile    | 1.000,<br>-0.0989,<br>0.0111,<br>0.0078 | 0.998,<br>-0.0487,<br>0.0111,<br>0.0079 | 0.880,<br>-0.0287,<br>0.0112,<br>0.008  | 0.274,<br>-0.0089,<br>0.0111,<br>0.0081 | 0.154,<br>0.0007,<br>0.0110,<br>0.0081  | 0.316,<br>0.0103,<br>0.0113,<br>0.0082 | 0.886,<br>0.0300,<br>0.0116,<br>0.0082 | 0.997,<br>0.0500,<br>0.0118,<br>0.0083 | 1.000,<br>0.0998,<br>0.0122,<br>0.0086 |
| cML-MA-BIC         | 1.000,<br>-0.0997,<br>0.0073,<br>0.0072 | 1.000,<br>-0.0497,<br>0.0074,<br>0.0073 | 0.985,<br>-0.0297,<br>0.0074,<br>0.0074 | 0.258,<br>-0.0097,<br>0.0075,<br>0.0074 | 0.050,<br>0.0003,<br>0.0075,<br>0.0075  | 0.277,<br>0.0103,<br>0.0075,<br>0.0075 | 0.978,<br>0.0303,<br>0.0076,<br>0.0076 | 1.000,<br>0.0503,<br>0.0077,<br>0.0077 | 1.000,<br>0.1003,<br>0.0079,<br>0.0079 |
| cML-MA-BIC-Profile | 1.000,<br>-0.0997,<br>0.0073,<br>0.0072 | 1.000,<br>-0.0497,<br>0.0074,<br>0.0073 | 0.985,<br>-0.0297,<br>0.0074,<br>0.0075 | 0.255,<br>-0.0097,<br>0.0075,<br>0.0075 | 0.048,<br>0.0003,<br>0.0075,<br>0.0075  | 0.272,<br>0.0103,<br>0.0075,<br>0.0075 | 0.976,<br>0.0303,<br>0.0076,<br>0.0076 | 1.000,<br>0.0503,<br>0.0077,<br>0.0077 | 1.000,<br>0.1003,<br>0.0079,<br>0.008  |
| cML-BIC            | 1.000,<br>-0.0997,<br>0.0073,<br>0.0071 | 1.000,<br>-0.0497,<br>0.0074,<br>0.0072 | 0.985,<br>-0.0297,<br>0.0074,<br>0.0073 | 0.263,<br>-0.0097,<br>0.0075,<br>0.0074 | 0.051,<br>0.0003,<br>0.0075,<br>0.0074  | 0.287,<br>0.0103,<br>0.0076,<br>0.0074 | 0.979,<br>0.0303,<br>0.0076,<br>0.0075 | 1.000,<br>0.0503,<br>0.0077,<br>0.0076 | 1.000,<br>0.1003,<br>0.0079,<br>0.0079 |
| cML-BIC-Profile    | 1.000,<br>-0.0997,<br>0.0073,<br>0.0072 | 1.000,<br>-0.0497,<br>0.0074,<br>0.0073 | 0.985,<br>-0.0297,<br>0.0074,<br>0.0073 | 0.258,<br>-0.0097,<br>0.0075,<br>0.0074 | 0.050,<br>0.0003,<br>0.0075,<br>0.0074  | 0.285,<br>0.0103,<br>0.0076,<br>0.0075 | 0.979,<br>0.0303,<br>0.0076,<br>0.0076 | 1.000,<br>0.0503,<br>0.0077,<br>0.0076 | 1.000,<br>0.1003,<br>0.0079,<br>0.0079 |
| MR-Mix             | 0.818,<br>-0.1121,<br>0.0361,<br>0.0597 | 0.703,<br>-0.0548,<br>0.0211,<br>0.0494 | 0.564,<br>-0.0331,<br>0.0169,<br>2.7381 | 0.117,<br>-0.0110,<br>0.0145,<br>0.2125 | 0.023,<br>-0.0003,<br>0.0141,<br>0.0529 | 0.134,<br>0.0105,<br>0.0145,<br>0.2533 | 0.568,<br>0.0322,<br>0.0163,<br>0.0943 | 0.692,<br>0.0528,<br>0.0198,<br>0.0715 | 0.790,<br>0.1027,<br>0.0316,<br>0.1241 |
| MR-ContMix         | 1.000,<br>-0.1212,<br>0.0102,<br>NA     | 0.998,<br>-0.0687,<br>0.0132,<br>NA     | 0.876,<br>-0.0436,<br>0.0156,<br>NA     | 0.234,<br>-0.0149,<br>0.0176,<br>NA     | 0.125,<br>0.0009,<br>0.0181,<br>NA      | 0.275,<br>0.0162,<br>0.0177,<br>NA     | 0.878,<br>0.0449,<br>0.0162,<br>NA     | 0.997,<br>0.0701,<br>0.0142,<br>NA     | 1.000,<br>0.1240,<br>0.0116,<br>NA     |
| MR-Lasso           | 1.000,<br>-0.0990,<br>0.0075,<br>0.0071 | 1.000,<br>-0.0494,<br>0.0077,<br>0.0073 | 0.980,<br>-0.0296,<br>0.0076,<br>0.0073 | 0.266,<br>-0.0097,<br>0.0077,<br>0.0074 | 0.058,<br>0.0002,<br>0.0077,<br>0.0074  | 0.288,<br>0.0101,<br>0.0078,<br>0.0075 | 0.972,<br>0.0301,<br>0.0078,<br>0.0076 | 1.000,<br>0.0498,<br>0.0078,<br>0.0076 | 1.000,<br>0.0994,<br>0.0082,<br>0.0079 |
| MR-PRESSO          | 1.000,<br>-0.0989,<br>0.0072,<br>0.0071 | 1.000,<br>-0.0493,<br>0.0073,<br>0.0072 | 0.986,<br>-0.0295,<br>0.0073,<br>0.0072 | 0.259,<br>-0.0096,<br>0.0074,<br>0.0073 | 0.043,<br>0.0003,<br>0.0074,<br>0.0073  | 0.282,<br>0.0102,<br>0.0075,<br>0.0074 | 0.980,<br>0.0301,<br>0.0075,<br>0.0074 | 1.000,<br>0.0499,<br>0.0076,<br>0.0075 | 1.000,<br>0.0996,<br>0.0078,<br>0.0078 |
| MR-IVW             | 1.000,<br>-0.0990,<br>0.0072,<br>0.0073 | 1.000,<br>-0.0493,<br>0.0073,<br>0.0074 | 0.984,<br>-0.0295,<br>0.0073,<br>0.0075 | 0.244,<br>-0.0096,<br>0.0074,<br>0.0075 | 0.043,<br>0.0003,<br>0.0074,<br>0.0076  | 0.267,<br>0.0102,<br>0.0074,<br>0.0076 | 0.980,<br>0.0301,<br>0.0075,<br>0.0077 | 1.000,<br>0.0499,<br>0.0076,<br>0.0078 | 1.000,<br>0.0996,<br>0.0078,<br>0.008  |
| MR-IVW-Oracle      | 1.000,<br>-0.0990,<br>0.0072,<br>0.0073 | 1.000,<br>-0.0493,<br>0.0073,<br>0.0074 | 0.984,<br>-0.0295,<br>0.0073,<br>0.0075 | 0.244,<br>-0.0096,<br>0.0074,<br>0.0075 | 0.043,<br>0.0003,<br>0.0074,<br>0.0076  | 0.267,<br>0.0102,<br>0.0074,<br>0.0076 | 0.980,<br>0.0301,<br>0.0075,<br>0.0077 | 1.000,<br>0.0499,<br>0.0076,<br>0.0078 | 1.000,<br>0.0996,<br>0.0078,<br>0.008  |
| MR-Egger           | 0.637,<br>-0.0824,<br>0.0345,<br>0.0355 | 0.208,<br>-0.0410,<br>0.0352,<br>0.0361 | 0.093,<br>-0.0245,<br>0.0355,<br>0.0365 | 0.047,<br>-0.0079,<br>0.0359,<br>0.0368 | 0.042,<br>0.0004,<br>0.0361,<br>0.037   | 0.050,<br>0.0087,<br>0.0363,<br>0.0372 | 0.100,<br>0.0252,<br>0.0367,<br>0.0376 | 0.194,<br>0.0418,<br>0.0372,<br>0.038  | 0.566,<br>0.0831,<br>0.0384,<br>0.0391 |
| MR-Weighted-Median | 1.000,<br>-0.0971,<br>0.0091,<br>0.0104 | 0.998,<br>-0.0485,<br>0.0093,<br>0.0106 | 0.811,<br>-0.0291,<br>0.0095,<br>0.0106 | 0.121,<br>-0.0096,<br>0.0096,<br>0.0107 | 0.029,<br>0.0002,<br>0.0096,<br>0.0108  | 0.125,<br>0.0099,<br>0.0096,<br>0.0108 | 0.801,<br>0.0294,<br>0.0098,<br>0.011  | 0.995,<br>0.0488,<br>0.0099,<br>0.0111 | 1.000,<br>0.0976,<br>0.0103,<br>0.0114 |
| MR-Weighted-Mode   | 0.994,<br>-0.0963,<br>0.0184,<br>0.0247 | 0.499,<br>-0.0480,<br>0.0190,<br>0.0251 | 0.130,<br>-0.0287,<br>0.0191,<br>0.0253 | 0.016,<br>-0.0094,<br>0.0194,<br>0.0255 | 0.008,<br>0.0002,<br>0.0195,<br>0.0257  | 0.013,<br>0.0098,<br>0.0197,<br>0.0258 | 0.147,<br>0.0290,<br>0.0198,<br>0.0261 | 0.450,<br>0.0485,<br>0.0199,<br>0.0264 | 0.982,<br>0.0969,<br>0.0204,<br>0.0272 |
| MR-RAPS1           | 1.000,<br>-0.0996,<br>0.0073,<br>0.0073 | 1.000,<br>-0.0497,<br>0.0073,<br>0.0074 | 0.984,<br>-0.0297,<br>0.0074,<br>0.0075 | 0.247,<br>-0.0097,<br>0.0074,<br>0.0076 | 0.041,<br>0.0003,<br>0.0075,<br>0.0076  | 0.266,<br>0.0103,<br>0.0075,<br>0.0076 | 0.980,<br>0.0303,<br>0.0076,<br>0.0077 | 1.000,<br>0.0503,<br>0.0076,<br>0.0078 | 1.000,<br>0.1003,<br>0.0079,<br>0.0081 |
| MR-RAPS2           | 1.000,<br>-0.1032,<br>1.1696,<br>0.0085 | 1.000,<br>-0.0266,<br>0.7274,<br>0.0079 | 0.974,<br>-0.0860,<br>2.2136,<br>0.0085 | 0.237,<br>-0.0016,<br>0.2561,<br>0.0079 | 0.048,<br>0.0003,<br>0.0076,<br>0.0078  | 0.255,<br>0.0103,<br>0.0077,<br>0.0079 | 0.967,<br>0.0303,<br>0.0078,<br>0.0079 | 1.000,<br>0.0354,<br>0.4716,<br>0.0084 | 1.000,<br>0.1237,<br>1.0524,<br>0.009  |
| MR-RAPS3           | 1.000,<br>-0.0997,<br>0.0073,<br>0.0072 | 1.000,<br>-0.0497,<br>0.0073,<br>0.0073 | 0.986,<br>-0.0297,<br>0.0074,<br>0.0073 | 0.259,<br>-0.0097,<br>0.0074,<br>0.0074 | 0.047,<br>0.0003,<br>0.0075,<br>0.0074  | 0.283,<br>0.0103,<br>0.0075,<br>0.0075 | 0.981,<br>0.0303,<br>0.0076,<br>0.0075 | 1.000,<br>0.0503,<br>0.0076,<br>0.0076 | 1.000,<br>0.1003,<br>0.0079,<br>0.0079 |
| MR-RAPS4           | 1.000,<br>-0.0997,<br>0.0075,<br>0.0073 | 1.000,<br>-0.0497,<br>0.0075,<br>0.0075 | 0.979,<br>-0.0297,<br>0.0076,<br>0.0075 | 0.249,<br>-0.0097,<br>0.0076,<br>0.0076 | 0.054,<br>0.0003,<br>0.0077,<br>0.0076  | 0.279,<br>0.0103,<br>0.0077,<br>0.0077 | 0.970,<br>0.0303,<br>0.0078,<br>0.0077 | 1.000,<br>0.0503,<br>0.0079,<br>0.0078 | 1.000,<br>0.1003,<br>0.0081,<br>0.0081 |

Table S69: Main simulations: in each cell, from top to bottom are empirical type-I error/power, mean( $\hat{\theta}$ ), SD( $\hat{\theta}$ ), mean(SE( $\hat{\theta}$ )) when  $m = 100$ , the ideal case of  $q = 0$ , and  $n = 100000$ .

| Methods \ $\theta$ | -0.1                                    | -0.05                                   | -0.03                                   | -0.01                                   | 0                                       | 0.01                                   | 0.03                                   | 0.05                                   | 0.1                                    |
|--------------------|-----------------------------------------|-----------------------------------------|-----------------------------------------|-----------------------------------------|-----------------------------------------|----------------------------------------|----------------------------------------|----------------------------------------|----------------------------------------|
| cML-MA-AIC         | 1.000,<br>-0.0988,<br>0.0075,<br>0.0061 | 1.000,<br>-0.0491,<br>0.0076,<br>0.0061 | 0.986,<br>-0.0292,<br>0.0077,<br>0.0061 | 0.358,<br>-0.0094,<br>0.0074,<br>0.0061 | 0.087,<br>-0.0002,<br>0.0070,<br>0.0061 | 0.344,<br>0.0090,<br>0.0074,<br>0.0062 | 0.980,<br>0.0287,<br>0.0079,<br>0.0063 | 1.000,<br>0.0486,<br>0.0080,<br>0.0064 | 1.000,<br>0.0984,<br>0.0082,<br>0.0066 |
| cML-MA-AIC-Profile | 1.000,<br>-0.0992,<br>0.0075,<br>0.006  | 1.000,<br>-0.0492,<br>0.0076,<br>0.0061 | 0.986,<br>-0.0292,<br>0.0077,<br>0.0061 | 0.357,<br>-0.0094,<br>0.0074,<br>0.0061 | 0.086,<br>-0.0002,<br>0.0070,<br>0.0061 | 0.343,<br>0.0090,<br>0.0074,<br>0.0062 | 0.980,<br>0.0287,<br>0.0079,<br>0.0063 | 1.000,<br>0.0487,<br>0.0080,<br>0.0064 | 1.000,<br>0.0987,<br>0.0083,<br>0.0066 |
| cML-AIC            | 1.000,<br>-0.0995,<br>0.0078,<br>0.0055 | 1.000,<br>-0.0497,<br>0.0079,<br>0.0056 | 0.992,<br>-0.0298,<br>0.0079,<br>0.0056 | 0.430,<br>-0.0098,<br>0.0079,<br>0.0057 | 0.159,<br>-0.0002,<br>0.0078,<br>0.0057 | 0.413,<br>0.0094,<br>0.0080,<br>0.0057 | 0.988,<br>0.0294,<br>0.0082,<br>0.0058 | 1.000,<br>0.0494,<br>0.0084,<br>0.0059 | 1.000,<br>0.0992,<br>0.0085,<br>0.006  |
| cML-AIC-Profile    | 1.000,<br>-0.0998,<br>0.0078,<br>0.0055 | 1.000,<br>-0.0498,<br>0.0078,<br>0.0056 | 0.992,<br>-0.0298,<br>0.0079,<br>0.0056 | 0.429,<br>-0.0098,<br>0.0079,<br>0.0057 | 0.156,<br>-0.0002,<br>0.0078,<br>0.0057 | 0.410,<br>0.0094,<br>0.0080,<br>0.0057 | 0.986,<br>0.0294,<br>0.0082,<br>0.0058 | 1.000,<br>0.0494,<br>0.0084,<br>0.0059 | 1.000,<br>0.0995,<br>0.0085,<br>0.0061 |
| cML-MA-BIC         | 1.000,<br>-0.1001,<br>0.0051,<br>0.0051 | 1.000,<br>-0.0501,<br>0.0052,<br>0.0052 | 1.000,<br>-0.0301,<br>0.0052,<br>0.0052 | 0.489,<br>-0.0101,<br>0.0052,<br>0.0052 | 0.044,<br>-0.0001,<br>0.0053,<br>0.0053 | 0.451,<br>0.0099,<br>0.0053,<br>0.0053 | 1.000,<br>0.0299,<br>0.0054,<br>0.0054 | 1.000,<br>0.0498,<br>0.0054,<br>0.0054 | 1.000,<br>0.0998,<br>0.0056,<br>0.0056 |
| cML-MA-BIC-Profile | 1.000,<br>-0.1001,<br>0.0051,<br>0.0051 | 1.000,<br>-0.0501,<br>0.0052,<br>0.0052 | 1.000,<br>-0.0301,<br>0.0052,<br>0.0052 | 0.489,<br>-0.0101,<br>0.0053,<br>0.0053 | 0.043,<br>-0.0001,<br>0.0053,<br>0.0053 | 0.450,<br>0.0099,<br>0.0053,<br>0.0053 | 1.000,<br>0.0299,<br>0.0054,<br>0.0054 | 1.000,<br>0.0498,<br>0.0054,<br>0.0054 | 1.000,<br>0.0998,<br>0.0056,<br>0.0056 |
| cML-BIC            | 1.000,<br>-0.1001,<br>0.0051,<br>0.005  | 1.000,<br>-0.0501,<br>0.0052,<br>0.0051 | 1.000,<br>-0.0301,<br>0.0052,<br>0.0052 | 0.500,<br>-0.0101,<br>0.0052,<br>0.0052 | 0.048,<br>-0.0001,<br>0.0053,<br>0.0052 | 0.457,<br>0.0099,<br>0.0053,<br>0.0053 | 1.000,<br>0.0299,<br>0.0054,<br>0.0053 | 1.000,<br>0.0499,<br>0.0054,<br>0.0054 | 1.000,<br>0.0998,<br>0.0056,<br>0.0056 |
| cML-BIC-Profile    | 1.000,<br>-0.1001,<br>0.0051,<br>0.0051 | 1.000,<br>-0.0501,<br>0.0052,<br>0.0051 | 1.000,<br>-0.0301,<br>0.0052,<br>0.0052 | 0.499,<br>-0.0101,<br>0.0052,<br>0.0052 | 0.048,<br>-0.0001,<br>0.0053,<br>0.0052 | 0.457,<br>0.0099,<br>0.0053,<br>0.0053 | 1.000,<br>0.0299,<br>0.0054,<br>0.0053 | 1.000,<br>0.0499,<br>0.0054,<br>0.0054 | 1.000,<br>0.0998,<br>0.0056,<br>0.0056 |
| MR-Mix             | 0.834,<br>-0.1131,<br>0.0343,<br>0.0346 | 0.746,<br>-0.0556,<br>0.0195,<br>0.2241 | 0.641,<br>-0.0335,<br>0.0148,<br>0.0725 | 0.229,<br>-0.0110,<br>0.0123,<br>0.3048 | 0.043,<br>-0.0001,<br>0.0119,<br>0.0887 | 0.212,<br>0.0106,<br>0.0123,<br>0.224  | 0.643,<br>0.0315,<br>0.0150,<br>0.1184 | 0.727,<br>0.0522,<br>0.0191,<br>0.0797 | 0.834,<br>0.1019,<br>0.0312,<br>0.1323 |
| MR-ContMix         | 1.000,<br>-0.1142,<br>0.0064,<br>NA     | 1.000,<br>-0.0663,<br>0.0080,<br>NA     | 0.991,<br>-0.0435,<br>0.0097,<br>NA     | 0.391,<br>-0.0159,<br>0.0121,<br>NA     | 0.114,<br>-0.0002,<br>0.0128,<br>NA     | 0.393,<br>0.0153,<br>0.0124,<br>NA     | 0.989,<br>0.0429,<br>0.0104,<br>NA     | 1.000,<br>0.0660,<br>0.0090,<br>NA     | 1.000,<br>0.1159,<br>0.0072,<br>NA     |
| MR-Lasso           | 1.000,<br>-0.0997,<br>0.0053,<br>0.0051 | 1.000,<br>-0.0499,<br>0.0054,<br>0.0052 | 1.000,<br>-0.0300,<br>0.0054,<br>0.0052 | 0.488,<br>-0.0100,<br>0.0055,<br>0.0053 | 0.057,<br>-0.0001,<br>0.0055,<br>0.0053 | 0.461,<br>0.0099,<br>0.0055,<br>0.0053 | 1.000,<br>0.0298,<br>0.0056,<br>0.0054 | 1.000,<br>0.0497,<br>0.0057,<br>0.0054 | 1.000,<br>0.0994,<br>0.0059,<br>0.0056 |
| MR-PRESSO          | 1.000,<br>-0.0997,<br>0.0051,<br>0.005  | 1.000,<br>-0.0499,<br>0.0052,<br>0.0051 | 1.000,<br>-0.0300,<br>0.0052,<br>0.0051 | 0.487,<br>-0.0101,<br>0.0053,<br>0.0052 | 0.050,<br>-0.0001,<br>0.0053,<br>0.0052 | 0.463,<br>0.0099,<br>0.0053,<br>0.0052 | 1.000,<br>0.0298,<br>0.0054,<br>0.0053 | 1.000,<br>0.0497,<br>0.0054,<br>0.0054 | 1.000,<br>0.0995,<br>0.0056,<br>0.0055 |
| MR-IVW             | 1.000,<br>-0.0997,<br>0.0051,<br>0.0052 | 1.000,<br>-0.0499,<br>0.0052,<br>0.0052 | 1.000,<br>-0.0300,<br>0.0052,<br>0.0053 | 0.481,<br>-0.0101,<br>0.0053,<br>0.0053 | 0.044,<br>-0.0001,<br>0.0053,<br>0.0054 | 0.446,<br>0.0099,<br>0.0053,<br>0.0054 | 1.000,<br>0.0298,<br>0.0054,<br>0.0055 | 1.000,<br>0.0497,<br>0.0054,<br>0.0055 | 1.000,<br>0.0995,<br>0.0056,<br>0.0057 |
| MR-IVW-Oracle      | 1.000,<br>-0.0997,<br>0.0051,<br>0.0052 | 1.000,<br>-0.0499,<br>0.0052,<br>0.0052 | 1.000,<br>-0.0300,<br>0.0052,<br>0.0053 | 0.481,<br>-0.0101,<br>0.0053,<br>0.0053 | 0.044,<br>-0.0001,<br>0.0053,<br>0.0054 | 0.446,<br>0.0099,<br>0.0053,<br>0.0054 | 1.000,<br>0.0298,<br>0.0054,<br>0.0055 | 1.000,<br>0.0497,<br>0.0054,<br>0.0055 | 1.000,<br>0.0995,<br>0.0056,<br>0.0057 |
| MR-Egger           | 0.934,<br>-0.0919,<br>0.0261,<br>0.0263 | 0.406,<br>-0.0466,<br>0.0265,<br>0.0268 | 0.185,<br>-0.0286,<br>0.0267,<br>0.027  | 0.062,<br>-0.0105,<br>0.0270,<br>0.0272 | 0.045,<br>-0.0014,<br>0.0271,<br>0.0274 | 0.059,<br>0.0076,<br>0.0272,<br>0.0275 | 0.162,<br>0.0257,<br>0.0275,<br>0.0278 | 0.350,<br>0.0438,<br>0.0279,<br>0.0281 | 0.876,<br>0.0890,<br>0.0288,<br>0.029  |
| MR-Weighted-Median | 1.000,<br>-0.0989,<br>0.0064,<br>0.0073 | 1.000,<br>-0.0496,<br>0.0065,<br>0.0075 | 0.991,<br>-0.0299,<br>0.0065,<br>0.0075 | 0.246,<br>-0.0102,<br>0.0065,<br>0.0076 | 0.023,<br>-0.0003,<br>0.0066,<br>0.0076 | 0.205,<br>0.0096,<br>0.0066,<br>0.0077 | 0.982,<br>0.0293,<br>0.0066,<br>0.0078 | 1.000,<br>0.0491,<br>0.0067,<br>0.0079 | 1.000,<br>0.0983,<br>0.0069,<br>0.0081 |
| MR-Weighted-Mode   | 1.000,<br>-0.0992,<br>0.0130,<br>0.0177 | 0.856,<br>-0.0499,<br>0.0132,<br>0.018  | 0.356,<br>-0.0303,<br>0.0133,<br>0.0181 | 0.024,<br>-0.0105,<br>0.0134,<br>0.0183 | 0.004,<br>-0.0005,<br>0.0135,<br>0.0184 | 0.022,<br>0.0093,<br>0.0135,<br>0.0185 | 0.303,<br>0.0290,<br>0.0136,<br>0.0187 | 0.810,<br>0.0487,<br>0.0137,<br>0.0189 | 1.000,<br>0.0977,<br>0.0141,<br>0.0195 |
| MR-RAPS1           | 1.000,<br>-0.1001,<br>0.0051,<br>0.0052 | 1.000,<br>-0.0501,<br>0.0052,<br>0.0053 | 1.000,<br>-0.0301,<br>0.0052,<br>0.0053 | 0.483,<br>-0.0101,<br>0.0053,<br>0.0053 | 0.045,<br>-0.0001,<br>0.0053,<br>0.0054 | 0.446,<br>0.0099,<br>0.0053,<br>0.0054 | 1.000,<br>0.0299,<br>0.0054,<br>0.0055 | 1.000,<br>0.0499,<br>0.0054,<br>0.0055 | 1.000,<br>0.0998,<br>0.0056,<br>0.0057 |
| MR-RAPS2           | 1.000,<br>-0.0354,<br>1.0272,<br>0.0064 | 1.000,<br>0.0342,<br>1.1871,<br>0.0068  | 1.000,<br>-0.0082,<br>1.1961,<br>0.0066 | 0.448,<br>-0.0101,<br>0.0053,<br>0.0055 | 0.040,<br>-0.0001,<br>0.0054,<br>0.0055 | 0.438,<br>0.0099,<br>0.0054,<br>0.0056 | 1.000,<br>0.0318,<br>0.5447,<br>0.0061 | 1.000,<br>0.1437,<br>2.2004,<br>0.007  | 1.000,<br>0.0740,<br>0.7759,<br>0.0065 |
| MR-RAPS3           | 1.000,<br>-0.1001,<br>0.0051,<br>0.005  | 1.000,<br>-0.0501,<br>0.0052,<br>0.0051 | 1.000,<br>-0.0301,<br>0.0052,<br>0.0052 | 0.500,<br>-0.0101,<br>0.0052,<br>0.0052 | 0.051,<br>-0.0001,<br>0.0053,<br>0.0052 | 0.461,<br>0.0099,<br>0.0053,<br>0.0053 | 1.000,<br>0.0299,<br>0.0054,<br>0.0053 | 1.000,<br>0.0499,<br>0.0055,<br>0.0054 | 1.000,<br>0.0999,<br>0.0056,<br>0.0056 |
| MR-RAPS4           | 1.000,<br>-0.1001,<br>0.0052,<br>0.0052 | 1.000,<br>-0.0501,<br>0.0053,<br>0.0053 | 1.000,<br>-0.0301,<br>0.0053,<br>0.0053 | 0.468,<br>-0.0101,<br>0.0054,<br>0.0054 | 0.047,<br>-0.0001,<br>0.0054,<br>0.0054 | 0.455,<br>0.0099,<br>0.0054,<br>0.0054 | 1.000,<br>0.0299,<br>0.0055,<br>0.0055 | 1.000,<br>0.0499,<br>0.0056,<br>0.0055 | 1.000,<br>0.0998,<br>0.0058,<br>0.0057 |

Table S70: Main simulations: in each cell, from top to bottom are empirical type-I error/power, mean( $\hat{\theta}$ ), SD( $\hat{\theta}$ ), mean(SE( $\hat{\theta}$ )) when  $m = 100$ , the ideal case of  $q = 0$ , and  $n = 200000$ .

| Methods \ $\theta$ | -0.1                                    | -0.05                                   | -0.03                                   | -0.01                                   | 0                                       | 0.01                                   | 0.03                                   | 0.05                                   | 0.1                                    |
|--------------------|-----------------------------------------|-----------------------------------------|-----------------------------------------|-----------------------------------------|-----------------------------------------|----------------------------------------|----------------------------------------|----------------------------------------|----------------------------------------|
| cML-MA-AIC         | 1.000,<br>-0.0989,<br>0.0053,<br>0.0042 | 1.000,<br>-0.0491,<br>0.0054,<br>0.0043 | 1.000,<br>-0.0291,<br>0.0055,<br>0.0043 | 0.536,<br>-0.0092,<br>0.0054,<br>0.0044 | 0.081,<br>0.0000,<br>0.0050,<br>0.0043  | 0.551,<br>0.0094,<br>0.0054,<br>0.0044 | 0.999,<br>0.0292,<br>0.0055,<br>0.0045 | 1.000,<br>0.0492,<br>0.0056,<br>0.0045 | 1.000,<br>0.0990,<br>0.0057,<br>0.0046 |
| cML-MA-AIC-Profile | 1.000,<br>-0.0992,<br>0.0053,<br>0.0042 | 1.000,<br>-0.0492,<br>0.0054,<br>0.0043 | 1.000,<br>-0.0292,<br>0.0055,<br>0.0043 | 0.536,<br>-0.0092,<br>0.0054,<br>0.0044 | 0.081,<br>0.0000,<br>0.0050,<br>0.0043  | 0.551,<br>0.0094,<br>0.0054,<br>0.0044 | 0.999,<br>0.0293,<br>0.0055,<br>0.0045 | 1.000,<br>0.0492,<br>0.0056,<br>0.0045 | 1.000,<br>0.0992,<br>0.0058,<br>0.0047 |
| cML-AIC            | 1.000,<br>-0.0995,<br>0.0056,<br>0.0039 | 1.000,<br>-0.0496,<br>0.0057,<br>0.0039 | 1.000,<br>-0.0296,<br>0.0057,<br>0.004  | 0.618,<br>-0.0096,<br>0.0057,<br>0.004  | 0.152,<br>0.0001,<br>0.0055,<br>0.004   | 0.623,<br>0.0098,<br>0.0057,<br>0.0041 | 0.999,<br>0.0297,<br>0.0058,<br>0.0041 | 1.000,<br>0.0497,<br>0.0058,<br>0.0041 | 1.000,<br>0.0995,<br>0.0060,<br>0.0043 |
| cML-AIC-Profile    | 1.000,<br>-0.0996,<br>0.0055,<br>0.0039 | 1.000,<br>-0.0496,<br>0.0057,<br>0.0039 | 1.000,<br>-0.0296,<br>0.0057,<br>0.004  | 0.618,<br>-0.0096,<br>0.0057,<br>0.004  | 0.152,<br>0.0001,<br>0.0055,<br>0.004   | 0.622,<br>0.0098,<br>0.0057,<br>0.0041 | 0.999,<br>0.0297,<br>0.0058,<br>0.0041 | 1.000,<br>0.0498,<br>0.0058,<br>0.0041 | 1.000,<br>0.0997,<br>0.0060,<br>0.0043 |
| cML-MA-BIC         | 1.000,<br>-0.1000,<br>0.0036,<br>0.0036 | 1.000,<br>-0.0500,<br>0.0037,<br>0.0036 | 1.000,<br>-0.0300,<br>0.0037,<br>0.0037 | 0.788,<br>-0.0100,<br>0.0037,<br>0.0037 | 0.048,<br>0.0000,<br>0.0037,<br>0.0037  | 0.760,<br>0.0099,<br>0.0037,<br>0.0037 | 1.000,<br>0.0299,<br>0.0037,<br>0.0038 | 1.000,<br>0.0499,<br>0.0038,<br>0.0038 | 1.000,<br>0.0999,<br>0.0039,<br>0.0039 |
| cML-MA-BIC-Profile | 1.000,<br>-0.1000,<br>0.0036,<br>0.0036 | 1.000,<br>-0.0500,<br>0.0037,<br>0.0036 | 1.000,<br>-0.0300,<br>0.0037,<br>0.0037 | 0.788,<br>-0.0100,<br>0.0037,<br>0.0037 | 0.047,<br>0.0000,<br>0.0037,<br>0.0037  | 0.759,<br>0.0099,<br>0.0037,<br>0.0037 | 1.000,<br>0.0299,<br>0.0037,<br>0.0038 | 1.000,<br>0.0499,<br>0.0038,<br>0.0038 | 1.000,<br>0.0999,<br>0.0039,<br>0.004  |
| cML-BIC            | 1.000,<br>-0.1001,<br>0.0036,<br>0.0036 | 1.000,<br>-0.0501,<br>0.0037,<br>0.0036 | 1.000,<br>-0.0301,<br>0.0037,<br>0.0036 | 0.791,<br>-0.0101,<br>0.0037,<br>0.0037 | 0.049,<br>-0.0001,<br>0.0037,<br>0.0037 | 0.764,<br>0.0100,<br>0.0037,<br>0.0037 | 1.000,<br>0.0300,<br>0.0037,<br>0.0038 | 1.000,<br>0.0500,<br>0.0038,<br>0.0038 | 1.000,<br>0.0999,<br>0.0039,<br>0.0039 |
| cML-BIC-Profile    | 1.000,<br>-0.1001,<br>0.0036,<br>0.0036 | 1.000,<br>-0.0501,<br>0.0037,<br>0.0036 | 1.000,<br>-0.0301,<br>0.0037,<br>0.0037 | 0.791,<br>-0.0101,<br>0.0037,<br>0.0037 | 0.048,<br>-0.0001,<br>0.0037,<br>0.0037 | 0.764,<br>0.0100,<br>0.0037,<br>0.0037 | 1.000,<br>0.0300,<br>0.0037,<br>0.0038 | 1.000,<br>0.0500,<br>0.0038,<br>0.0038 | 1.000,<br>0.0999,<br>0.0039,<br>0.0039 |
| MR-Mix             | 0.859,<br>-0.1121,<br>0.0340,<br>0.1045 | 0.809,<br>-0.0549,<br>0.0175,<br>0.0315 | 0.731,<br>-0.0326,<br>0.0120,<br>0.0487 | 0.404,<br>-0.0105,<br>0.0083,<br>0.0341 | 0.072,<br>0.0004,<br>0.0075,<br>0.1511  | 0.361,<br>0.0110,<br>0.0081,<br>0.0297 | 0.725,<br>0.0321,<br>0.0120,<br>0.0291 | 0.806,<br>0.0527,<br>0.0171,<br>0.0874 | 0.844,<br>0.1021,<br>0.0307,<br>0.123  |
| MR-ContMix         | 1.000,<br>-0.1074,<br>0.0042,<br>NA     | 1.000,<br>-0.0616,<br>0.0050,<br>NA     | 1.000,<br>-0.0411,<br>0.0062,<br>NA     | 0.597,<br>-0.0156,<br>0.0084,<br>NA     | 0.106,<br>0.0001,<br>0.0092,<br>NA      | 0.613,<br>0.0156,<br>0.0086,<br>NA     | 1.000,<br>0.0414,<br>0.0064,<br>NA     | 1.000,<br>0.0623,<br>0.0053,<br>NA     | 1.000,<br>0.1091,<br>0.0046,<br>NA     |
| MR-Lasso           | 1.000,<br>-0.0998,<br>0.0038,<br>0.0036 | 1.000,<br>-0.0499,<br>0.0038,<br>0.0036 | 1.000,<br>-0.0300,<br>0.0038,<br>0.0037 | 0.766,<br>-0.0100,<br>0.0038,<br>0.0037 | 0.061,<br>0.0000,<br>0.0039,<br>0.0037  | 0.745,<br>0.0099,<br>0.0039,<br>0.0038 | 1.000,<br>0.0299,<br>0.0039,<br>0.0038 | 1.000,<br>0.0499,<br>0.0039,<br>0.0038 | 1.000,<br>0.0998,<br>0.0040,<br>0.0039 |
| MR-PRESSO          | 1.000,<br>-0.0999,<br>0.0036,<br>0.0036 | 1.000,<br>-0.0499,<br>0.0036,<br>0.0036 | 1.000,<br>-0.0300,<br>0.0037,<br>0.0036 | 0.759,<br>-0.0100,<br>0.0037,<br>0.0037 | 0.048,<br>0.0000,<br>0.0037,<br>0.0037  | 0.758,<br>0.0099,<br>0.0037,<br>0.0037 | 1.000,<br>0.0299,<br>0.0037,<br>0.0037 | 1.000,<br>0.0499,<br>0.0037,<br>0.0038 | 1.000,<br>0.0998,<br>0.0038,<br>0.0039 |
| MR-IVW             | 1.000,<br>-0.0999,<br>0.0036,<br>0.0036 | 1.000,<br>-0.0500,<br>0.0036,<br>0.0037 | 1.000,<br>-0.0300,<br>0.0037,<br>0.0037 | 0.761,<br>-0.0100,<br>0.0037,<br>0.0038 | 0.043,<br>-0.0001,<br>0.0037,<br>0.0038 | 0.750,<br>0.0099,<br>0.0037,<br>0.0038 | 1.000,<br>0.0299,<br>0.0037,<br>0.0039 | 1.000,<br>0.0499,<br>0.0037,<br>0.0039 | 1.000,<br>0.0998,<br>0.0038,<br>0.004  |
| MR-IVW-Oracle      | 1.000,<br>-0.0999,<br>0.0036,<br>0.0036 | 1.000,<br>-0.0500,<br>0.0036,<br>0.0037 | 1.000,<br>-0.0300,<br>0.0037,<br>0.0037 | 0.761,<br>-0.0100,<br>0.0037,<br>0.0038 | 0.043,<br>-0.0001,<br>0.0037,<br>0.0038 | 0.750,<br>0.0099,<br>0.0037,<br>0.0038 | 1.000,<br>0.0299,<br>0.0037,<br>0.0039 | 1.000,<br>0.0499,<br>0.0037,<br>0.0039 | 1.000,<br>0.0998,<br>0.0038,<br>0.004  |
| MR-Egger           | 1.000,<br>-0.0958,<br>0.0190,<br>0.019  | 0.702,<br>-0.0481,<br>0.0193,<br>0.0194 | 0.320,<br>-0.0291,<br>0.0195,<br>0.0195 | 0.086,<br>-0.0100,<br>0.0197,<br>0.0197 | 0.050,<br>-0.0005,<br>0.0197,<br>0.0198 | 0.073,<br>0.0091,<br>0.0198,<br>0.0199 | 0.285,<br>0.0281,<br>0.0201,<br>0.0201 | 0.644,<br>0.0472,<br>0.0203,<br>0.0204 | 0.997,<br>0.0948,<br>0.0209,<br>0.021  |
| MR-Weighted-Median | 1.000,<br>-0.0993,<br>0.0046,<br>0.0052 | 1.000,<br>-0.0496,<br>0.0047,<br>0.0053 | 1.000,<br>-0.0297,<br>0.0047,<br>0.0053 | 0.435,<br>-0.0099,<br>0.0048,<br>0.0054 | 0.028,<br>0.0000,<br>0.0048,<br>0.0054  | 0.466,<br>0.0100,<br>0.0049,<br>0.0054 | 1.000,<br>0.0298,<br>0.0049,<br>0.0055 | 1.000,<br>0.0497,<br>0.0049,<br>0.0056 | 1.000,<br>0.0993,<br>0.0050,<br>0.0057 |
| MR-Weighted-Mode   | 1.000,<br>-0.0987,<br>0.0096,<br>0.0126 | 0.988,<br>-0.0492,<br>0.0098,<br>0.0128 | 0.661,<br>-0.0295,<br>0.0100,<br>0.013  | 0.053,<br>-0.0097,<br>0.0101,<br>0.0131 | 0.003,<br>0.0003,<br>0.0100,<br>0.0131  | 0.049,<br>0.0102,<br>0.0101,<br>0.0132 | 0.651,<br>0.0299,<br>0.0101,<br>0.0134 | 0.981,<br>0.0496,<br>0.0101,<br>0.0135 | 1.000,<br>0.0991,<br>0.0102,<br>0.014  |
| MR-RAPS1           | 1.000,<br>-0.1000,<br>0.0036,<br>0.0037 | 1.000,<br>-0.0500,<br>0.0036,<br>0.0037 | 1.000,<br>-0.0300,<br>0.0037,<br>0.0037 | 0.769,<br>-0.0100,<br>0.0037,<br>0.0038 | 0.045,<br>0.0000,<br>0.0037,<br>0.0038  | 0.752,<br>0.0100,<br>0.0037,<br>0.0038 | 1.000,<br>0.0300,<br>0.0037,<br>0.0039 | 1.000,<br>0.0499,<br>0.0038,<br>0.0039 | 1.000,<br>0.0999,<br>0.0038,<br>0.004  |
| MR-RAPS2           | 1.000,<br>-0.0878,<br>0.1467,<br>0.0039 | 1.000,<br>-0.0640,<br>0.4223,<br>0.0044 | 1.000,<br>-0.0505,<br>0.9665,<br>0.0052 | 0.742,<br>-0.0100,<br>0.0038,<br>0.0039 | 0.049,<br>0.0000,<br>0.0038,<br>0.0039  | 0.725,<br>0.0100,<br>0.0038,<br>0.0039 | 1.000,<br>0.0179,<br>0.7288,<br>0.0048 | 1.000,<br>0.0693,<br>0.5024,<br>0.0046 | 1.000,<br>0.0963,<br>0.2849,<br>0.0045 |
| MR-RAPS3           | 1.000,<br>-0.1001,<br>0.0036,<br>0.0036 | 1.000,<br>-0.0501,<br>0.0036,<br>0.0036 | 1.000,<br>-0.0301,<br>0.0036,<br>0.0036 | 0.791,<br>-0.0101,<br>0.0037,<br>0.0037 | 0.049,<br>-0.0001,<br>0.0037,<br>0.0037 | 0.763,<br>0.0099,<br>0.0037,<br>0.0037 | 1.000,<br>0.0300,<br>0.0037,<br>0.0038 | 1.000,<br>0.0500,<br>0.0038,<br>0.0038 | 1.000,<br>0.1000,<br>0.0039,<br>0.0039 |
| MR-RAPS4           | 1.000,<br>-0.1000,<br>0.0037,<br>0.0037 | 1.000,<br>-0.0500,<br>0.0037,<br>0.0037 | 1.000,<br>-0.0300,<br>0.0037,<br>0.0037 | 0.761,<br>-0.0100,<br>0.0038,<br>0.0038 | 0.055,<br>0.0000,<br>0.0038,<br>0.0038  | 0.740,<br>0.0100,<br>0.0038,<br>0.0038 | 1.000,<br>0.0300,<br>0.0038,<br>0.0039 | 1.000,<br>0.0500,<br>0.0038,<br>0.0039 | 1.000,<br>0.1000,<br>0.0039,<br>0.004  |

Table S71: Main simulations: in each cell, from top to bottom are empirical type-I error/power, mean( $\hat{\theta}$ ), SD( $\hat{\theta}$ ), mean(SE( $\hat{\theta}$ )) when  $m = 100$ , the InSIDE satisfied,  $q = 0.2$ , and  $n = 50000$ .

| Methods \ $\theta$ | -0.1                                    | -0.05                                   | -0.03                                   | -0.01                                   | 0                                       | 0.01                                   | 0.03                                    | 0.05                                    | 0.1                                     |
|--------------------|-----------------------------------------|-----------------------------------------|-----------------------------------------|-----------------------------------------|-----------------------------------------|----------------------------------------|-----------------------------------------|-----------------------------------------|-----------------------------------------|
| cML-MA-AIC         | 1.000,<br>-0.0970,<br>0.0128,<br>0.0104 | 0.975,<br>-0.0473,<br>0.0129,<br>0.0105 | 0.695,<br>-0.0274,<br>0.0128,<br>0.0106 | 0.157,<br>-0.0083,<br>0.0120,<br>0.0106 | 0.077,<br>0.0008,<br>0.0118,<br>0.0106  | 0.182,<br>0.0097,<br>0.0123,<br>0.0107 | 0.704,<br>0.0288,<br>0.0133,<br>0.0109  | 0.974,<br>0.0487,<br>0.0134,<br>0.011   | 1.000,<br>0.0985,<br>0.0136,<br>0.0113  |
| cML-MA-AIC-Profile | 1.000,<br>-0.0975,<br>0.0130,<br>0.0105 | 0.975,<br>-0.0474,<br>0.0130,<br>0.0106 | 0.693,<br>-0.0274,<br>0.0128,<br>0.0107 | 0.155,<br>-0.0083,<br>0.0120,<br>0.0107 | 0.075,<br>0.0008,<br>0.0118,<br>0.0107  | 0.179,<br>0.0097,<br>0.0123,<br>0.0108 | 0.699,<br>0.0289,<br>0.0133,<br>0.011   | 0.974,<br>0.0488,<br>0.0135,<br>0.0111  | 1.000,<br>0.0990,<br>0.0138,<br>0.0114  |
| cML-AIC            | 1.000,<br>-0.0983,<br>0.0134,<br>0.0095 | 0.985,<br>-0.0486,<br>0.0135,<br>0.0097 | 0.750,<br>-0.0285,<br>0.0136,<br>0.0097 | 0.243,<br>-0.0090,<br>0.0133,<br>0.0098 | 0.142,<br>0.0006,<br>0.0132,<br>0.0098  | 0.261,<br>0.0101,<br>0.0135,<br>0.0099 | 0.773,<br>0.0299,<br>0.0140,<br>0.01    | 0.981,<br>0.0500,<br>0.0141,<br>0.0101  | 1.000,<br>0.0999,<br>0.0143,<br>0.0104  |
| cML-AIC-Profile    | 1.000,<br>-0.0986,<br>0.0135,<br>0.0096 | 0.984,<br>-0.0486,<br>0.0135,<br>0.0097 | 0.747,<br>-0.0286,<br>0.0137,<br>0.0098 | 0.240,<br>-0.0090,<br>0.0133,<br>0.0099 | 0.139,<br>0.0006,<br>0.0132,<br>0.0099  | 0.259,<br>0.0101,<br>0.0135,<br>0.01   | 0.767,<br>0.0299,<br>0.0140,<br>0.0101  | 0.981,<br>0.0501,<br>0.0141,<br>0.0102  | 1.000,<br>0.1003,<br>0.0144,<br>0.0104  |
| cML-MA-BIC         | 1.000,<br>-0.0997,<br>0.0087,<br>0.0088 | 0.999,<br>-0.0497,<br>0.0088,<br>0.009  | 0.915,<br>-0.0297,<br>0.0088,<br>0.009  | 0.182,<br>-0.0097,<br>0.0089,<br>0.0091 | 0.053,<br>0.0003,<br>0.0089,<br>0.0091  | 0.192,<br>0.0103,<br>0.0090,<br>0.0092 | 0.910,<br>0.0303,<br>0.0091,<br>0.0093  | 1.000,<br>0.0503,<br>0.0091,<br>0.0093  | 1.000,<br>0.1003,<br>0.0094,<br>0.0096  |
| cML-MA-BIC-Profile | 1.000,<br>-0.0997,<br>0.0087,<br>0.0089 | 0.999,<br>-0.0497,<br>0.0088,<br>0.009  | 0.913,<br>-0.0297,<br>0.0088,<br>0.0091 | 0.182,<br>-0.0097,<br>0.0089,<br>0.0091 | 0.052,<br>0.0003,<br>0.0089,<br>0.0092  | 0.189,<br>0.0103,<br>0.0090,<br>0.0092 | 0.910,<br>0.0303,<br>0.0091,<br>0.0093  | 1.000,<br>0.0503,<br>0.0091,<br>0.0094  | 1.000,<br>0.1003,<br>0.0094,<br>0.0096  |
| cML-BIC            | 1.000,<br>-0.0997,<br>0.0087,<br>0.0088 | 0.999,<br>-0.0497,<br>0.0088,<br>0.0089 | 0.924,<br>-0.0297,<br>0.0089,<br>0.009  | 0.189,<br>-0.0097,<br>0.0089,<br>0.009  | 0.053,<br>0.0003,<br>0.0090,<br>0.0091  | 0.197,<br>0.0103,<br>0.0090,<br>0.0091 | 0.912,<br>0.0303,<br>0.0091,<br>0.0092  | 1.000,<br>0.0503,<br>0.0092,<br>0.0093  | 1.000,<br>0.1003,<br>0.0094,<br>0.0095  |
| cML-BIC-Profile    | 1.000,<br>-0.0997,<br>0.0087,<br>0.0088 | 0.999,<br>-0.0497,<br>0.0088,<br>0.0089 | 0.922,<br>-0.0297,<br>0.0089,<br>0.009  | 0.188,<br>-0.0097,<br>0.0089,<br>0.0091 | 0.052,<br>0.0003,<br>0.0090,<br>0.0091  | 0.196,<br>0.0103,<br>0.0090,<br>0.0091 | 0.912,<br>0.0303,<br>0.0091,<br>0.0092  | 1.000,<br>0.0503,<br>0.0092,<br>0.0093  | 1.000,<br>0.1003,<br>0.0094,<br>0.0096  |
| MR-Mix             | 1.000,<br>-0.1108,<br>0.0129,<br>0.0193 | 0.899,<br>-0.0545,<br>0.0128,<br>0.0191 | 0.384,<br>-0.0327,<br>0.0128,<br>0.019  | 0.031,<br>-0.0113,<br>0.0128,<br>0.0189 | 0.011,<br>-0.0007,<br>0.0129,<br>0.0189 | 0.024,<br>0.0099,<br>0.0129,<br>0.0189 | 0.340,<br>0.0308,<br>0.0131,<br>0.0188  | 0.858,<br>0.0513,<br>0.0131,<br>0.0187  | 1.000,<br>0.1009,<br>0.0130,<br>0.0186  |
| MR-ContMix         | 1.000,<br>-0.0987,<br>0.0093,<br>NA     | 0.999,<br>-0.0491,<br>0.0093,<br>NA     | 0.874,<br>-0.0292,<br>0.0094,<br>NA     | 0.154,<br>-0.0094,<br>0.0095,<br>NA     | 0.045,<br>0.0006,<br>0.0095,<br>NA      | 0.182,<br>0.0105,<br>0.0095,<br>NA     | 0.881,<br>0.0303,<br>0.0097,<br>NA      | 1.000,<br>0.0502,<br>0.0098,<br>NA      | 1.000,<br>0.0999,<br>0.0100,<br>NA      |
| MR-Lasso           | 1.000,<br>-0.0989,<br>0.0089,<br>0.0088 | 0.999,<br>-0.0492,<br>0.0091,<br>0.009  | 0.908,<br>-0.0293,<br>0.0090,<br>0.009  | 0.183,<br>-0.0095,<br>0.0091,<br>0.0091 | 0.060,<br>0.0004,<br>0.0091,<br>0.0091  | 0.194,<br>0.0103,<br>0.0092,<br>0.0092 | 0.904,<br>0.0302,<br>0.0094,<br>0.0093  | 1.000,<br>0.0501,<br>0.0094,<br>0.0093  | 1.000,<br>0.0997,<br>0.0096,<br>0.0096  |
| MR-PRESSO          | 1.000,<br>-0.0988,<br>0.0105,<br>0.0085 | 0.995,<br>-0.0492,<br>0.0106,<br>0.0086 | 0.878,<br>-0.0294,<br>0.0105,<br>0.0087 | 0.236,<br>-0.0095,<br>0.0106,<br>0.0088 | 0.094,<br>0.0004,<br>0.0106,<br>0.0088  | 0.239,<br>0.0103,<br>0.0106,<br>0.0088 | 0.885,<br>0.0301,<br>0.0106,<br>0.0089  | 0.997,<br>0.0499,<br>0.0106,<br>0.009   | 1.000,<br>0.0995,<br>0.0107,<br>0.0093  |
| MR-IVW             | 0.269,<br>-0.0992,<br>0.0755,<br>0.074  | 0.116,<br>-0.0494,<br>0.0755,<br>0.074  | 0.074,<br>-0.0294,<br>0.0755,<br>0.074  | 0.054,<br>-0.0095,<br>0.0755,<br>0.074  | 0.057,<br>0.0005,<br>0.0755,<br>0.074   | 0.056,<br>0.0104,<br>0.0755,<br>0.074  | 0.069,<br>0.0304,<br>0.0755,<br>0.074   | 0.114,<br>0.0503,<br>0.0755,<br>0.074   | 0.274,<br>0.1001,<br>0.0755,<br>0.0741  |
| MR-IVW-Oracle      | 1.000,<br>-0.0991,<br>0.0086,<br>0.009  | 0.999,<br>-0.0494,<br>0.0087,<br>0.0091 | 0.905,<br>-0.0296,<br>0.0087,<br>0.0092 | 0.179,<br>-0.0097,<br>0.0088,<br>0.0092 | 0.051,<br>0.0002,<br>0.0088,<br>0.0093  | 0.182,<br>0.0102,<br>0.0089,<br>0.0093 | 0.900,<br>0.0300,<br>0.0089,<br>0.0094  | 1.000,<br>0.0499,<br>0.0090,<br>0.0095  | 1.000,<br>0.0995,<br>0.0093,<br>0.0097  |
| MR-Egger           | 0.074,<br>-0.0853,<br>0.3835,<br>0.3612 | 0.071,<br>-0.0437,<br>0.3834,<br>0.3612 | 0.072,<br>-0.0270,<br>0.3834,<br>0.3612 | 0.069,<br>-0.0103,<br>0.3834,<br>0.3612 | 0.068,<br>-0.0020,<br>0.3834,<br>0.3612 | 0.067,<br>0.0063,<br>0.3834,<br>0.3612 | 0.067,<br>0.0230,<br>0.3834,<br>0.3612  | 0.069,<br>0.0396,<br>0.3834,<br>0.3613  | 0.071,<br>0.0812,<br>0.3834,<br>0.3613  |
| MR-Weighted-Median | 1.000,<br>-0.0963,<br>0.0110,<br>0.0128 | 0.978,<br>-0.0480,<br>0.0109,<br>0.0129 | 0.610,<br>-0.0287,<br>0.0110,<br>0.013  | 0.076,<br>-0.0094,<br>0.0110,<br>0.0131 | 0.019,<br>0.0004,<br>0.0111,<br>0.0132  | 0.073,<br>0.0101,<br>0.0112,<br>0.0132 | 0.606,<br>0.0294,<br>0.0114,<br>0.0134  | 0.968,<br>0.0488,<br>0.0116,<br>0.0135  | 1.000,<br>0.0971,<br>0.0119,<br>0.0139  |
| MR-Weighted-Mode   | 0.998,<br>-0.0963,<br>0.0173,<br>0.0221 | 0.588,<br>-0.0480,<br>0.0173,<br>0.0224 | 0.201,<br>-0.0288,<br>0.0176,<br>0.0226 | 0.024,<br>-0.0095,<br>0.0177,<br>0.0227 | 0.009,<br>0.0004,<br>0.0179,<br>0.0228  | 0.023,<br>0.0100,<br>0.0178,<br>0.0229 | 0.211,<br>0.0295,<br>0.0181,<br>0.0233  | 0.574,<br>0.0489,<br>0.0183,<br>0.0233  | 0.990,<br>0.0974,<br>0.0188,<br>0.024   |
| MR-RAPS1           | 0.265,<br>-0.0994,<br>0.0735,<br>0.074  | 0.105,<br>-0.0494,<br>0.0735,<br>0.074  | 0.072,<br>-0.0294,<br>0.0735,<br>0.074  | 0.049,<br>-0.0094,<br>0.0735,<br>0.074  | 0.046,<br>0.0006,<br>0.0735,<br>0.074   | 0.047,<br>0.0106,<br>0.0735,<br>0.074  | 0.063,<br>0.0306,<br>0.0736,<br>0.074   | 0.108,<br>0.0506,<br>0.0736,<br>0.074   | 0.265,<br>0.1006,<br>0.0736,<br>0.074   |
| MR-RAPS2           | 1.000,<br>0.0598,<br>1.5440,<br>0.0137  | 1.000,<br>0.1228,<br>2.1237,<br>0.0138  | 0.972,<br>0.1311,<br>1.8903,<br>0.0134  | 0.704,<br>0.0071,<br>0.7392,<br>0.0123  | 0.620,<br>0.0196,<br>0.8700,<br>0.0125  | 0.699,<br>0.0482,<br>1.5487,<br>0.0132 | 0.970,<br>-0.0728,<br>2.4757,<br>0.0137 | 1.000,<br>-0.0804,<br>2.9620,<br>0.0139 | 1.000,<br>-0.0340,<br>1.5029,<br>0.0144 |
| MR-RAPS3           | 0.924,<br>-0.2649,<br>0.1863,<br>0.0226 | 0.885,<br>-0.1287,<br>0.1926,<br>0.0222 | 0.847,<br>-0.0753,<br>0.1915,<br>0.0219 | 0.837,<br>-0.0235,<br>0.1886,<br>0.0215 | 0.837,<br>0.0016,<br>0.1866,<br>0.0213  | 0.833,<br>0.0261,<br>0.1843,<br>0.0211 | 0.843,<br>0.0733,<br>0.1789,<br>0.0207  | 0.876,<br>0.1178,<br>0.1728,<br>0.0203  | 0.926,<br>0.2178,<br>0.1564,<br>0.0192  |
| MR-RAPS4           | 1.000,<br>0.1534,<br>0.9997,<br>0.0161  | 1.000,<br>0.0905,<br>0.9088,<br>0.0144  | 0.988,<br>0.0856,<br>0.9108,<br>0.0143  | 0.848,<br>0.0637,<br>0.8849,<br>0.014   | 0.807,<br>0.0443,<br>0.8960,<br>0.0141  | 0.831,<br>0.0755,<br>0.8876,<br>0.014  | 0.985,<br>0.0051,<br>0.9049,<br>0.0142  | 1.000,<br>-0.0316,<br>0.9254,<br>0.0144 | 1.000,<br>-0.0231,<br>0.9971,<br>0.0152 |

Table S72: Main simulations: in each cell, from top to bottom are empirical type-I error/power, mean( $\hat{\theta}$ ), SD( $\hat{\theta}$ ), mean(SE( $\hat{\theta}$ )) when  $m = 100$ , the InSIDE satisfied,  $q = 0.2$ , and  $n = 100000$ .

| Methods \ $\theta$ | -0.1                                    | -0.05                                   | -0.03                                   | -0.01                                   | 0                                       | 0.01                                    | 0.03                                    | 0.05                                    | 0.1                                     |
|--------------------|-----------------------------------------|-----------------------------------------|-----------------------------------------|-----------------------------------------|-----------------------------------------|-----------------------------------------|-----------------------------------------|-----------------------------------------|-----------------------------------------|
| cML-MA-AIC         | 1.000,<br>-0.0982,<br>0.0090,<br>0.0074 | 1.000,<br>-0.0484,<br>0.0091,<br>0.0075 | 0.919,<br>-0.0285,<br>0.0092,<br>0.0075 | 0.254,<br>-0.0090,<br>0.0087,<br>0.0075 | 0.081,<br>0.0000,<br>0.0084,<br>0.0075  | 0.258,<br>0.0091,<br>0.0088,<br>0.0076  | 0.915,<br>0.0286,<br>0.0095,<br>0.0077  | 0.999,<br>0.0485,<br>0.0096,<br>0.0078  | 1.000,<br>0.0982,<br>0.0098,<br>0.008   |
| cML-MA-AIC-Profile | 1.000,<br>-0.0985,<br>0.0091,<br>0.0074 | 1.000,<br>-0.0485,<br>0.0092,<br>0.0075 | 0.918,<br>-0.0285,<br>0.0092,<br>0.0075 | 0.251,<br>-0.0090,<br>0.0087,<br>0.0075 | 0.080,<br>0.0000,<br>0.0084,<br>0.0075  | 0.257,<br>0.0091,<br>0.0088,<br>0.0076  | 0.914,<br>0.0286,<br>0.0095,<br>0.0077  | 0.999,<br>0.0486,<br>0.0096,<br>0.0078  | 1.000,<br>0.0986,<br>0.0099,<br>0.008   |
| cML-AIC            | 1.000,<br>-0.0992,<br>0.0095,<br>0.0068 | 1.000,<br>-0.0493,<br>0.0095,<br>0.0068 | 0.949,<br>-0.0294,<br>0.0096,<br>0.0069 | 0.337,<br>-0.0096,<br>0.0094,<br>0.0069 | 0.132,<br>0.0000,<br>0.0093,<br>0.007   | 0.346,<br>0.0096,<br>0.0095,<br>0.007   | 0.939,<br>0.0294,<br>0.0099,<br>0.0071  | 0.999,<br>0.0494,<br>0.0100,<br>0.0071  | 1.000,<br>0.0992,<br>0.0104,<br>0.0073  |
| cML-AIC-Profile    | 1.000,<br>-0.0995,<br>0.0095,<br>0.0068 | 1.000,<br>-0.0493,<br>0.0095,<br>0.0069 | 0.948,<br>-0.0294,<br>0.0096,<br>0.0069 | 0.336,<br>-0.0096,<br>0.0094,<br>0.007  | 0.128,<br>0.0000,<br>0.0093,<br>0.007   | 0.343,<br>0.0096,<br>0.0095,<br>0.007   | 0.938,<br>0.0294,<br>0.0099,<br>0.0071  | 0.999,<br>0.0494,<br>0.0100,<br>0.0072  | 1.000,<br>0.0994,<br>0.0104,<br>0.0074  |
| cML-MA-BIC         | 1.000,<br>-0.0999,<br>0.0063,<br>0.0062 | 1.000,<br>-0.0500,<br>0.0063,<br>0.0063 | 0.999,<br>-0.0300,<br>0.0064,<br>0.0064 | 0.365,<br>-0.0100,<br>0.0064,<br>0.0064 | 0.048,<br>0.0000,<br>0.0064,<br>0.0064  | 0.343,<br>0.0100,<br>0.0065,<br>0.0065  | 0.998,<br>0.0299,<br>0.0065,<br>0.0065  | 1.000,<br>0.0499,<br>0.0066,<br>0.0066  | 1.000,<br>0.0999,<br>0.0068,<br>0.0068  |
| cML-MA-BIC-Profile | 1.000,<br>-0.0999,<br>0.0063,<br>0.0063 | 1.000,<br>-0.0500,<br>0.0063,<br>0.0063 | 0.998,<br>-0.0300,<br>0.0064,<br>0.0064 | 0.364,<br>-0.0100,<br>0.0064,<br>0.0064 | 0.048,<br>0.0000,<br>0.0064,<br>0.0065  | 0.340,<br>0.0100,<br>0.0065,<br>0.0065  | 0.998,<br>0.0299,<br>0.0065,<br>0.0065  | 1.000,<br>0.0499,<br>0.0066,<br>0.0066  | 1.000,<br>0.0999,<br>0.0068,<br>0.0068  |
| cML-BIC            | 1.000,<br>-0.1000,<br>0.0062,<br>0.0062 | 1.000,<br>-0.0500,<br>0.0063,<br>0.0063 | 0.999,<br>-0.0300,<br>0.0063,<br>0.0063 | 0.374,<br>-0.0100,<br>0.0064,<br>0.0064 | 0.051,<br>0.0000,<br>0.0064,<br>0.0064  | 0.345,<br>0.0100,<br>0.0064,<br>0.0064  | 0.998,<br>0.0300,<br>0.0065,<br>0.0065  | 1.000,<br>0.0499,<br>0.0066,<br>0.0066  | 1.000,<br>0.0999,<br>0.0068,<br>0.0067  |
| cML-BIC-Profile    | 1.000,<br>-0.1000,<br>0.0062,<br>0.0062 | 1.000,<br>-0.0500,<br>0.0063,<br>0.0063 | 0.999,<br>-0.0300,<br>0.0063,<br>0.0063 | 0.373,<br>-0.0100,<br>0.0064,<br>0.0064 | 0.051,<br>0.0000,<br>0.0064,<br>0.0064  | 0.343,<br>0.0100,<br>0.0064,<br>0.0064  | 0.998,<br>0.0300,<br>0.0065,<br>0.0065  | 1.000,<br>0.0499,<br>0.0066,<br>0.0066  | 1.000,<br>0.0999,<br>0.0068,<br>0.0067  |
| MR-Mix             | 1.000,<br>-0.1107,<br>0.0095,<br>0.0152 | 0.983,<br>-0.0545,<br>0.0096,<br>0.015  | 0.629,<br>-0.0326,<br>0.0096,<br>0.015  | 0.041,<br>-0.0110,<br>0.0095,<br>0.015  | 0.004,<br>-0.0003,<br>0.0094,<br>0.0149 | 0.036,<br>0.0104,<br>0.0095,<br>0.0149  | 0.603,<br>0.0313,<br>0.0095,<br>0.0149  | 0.973,<br>0.0518,<br>0.0096,<br>0.0149  | 1.000,<br>0.1014,<br>0.0099,<br>0.0148  |
| MR-ContMix         | 1.000,<br>-0.0995,<br>0.0066,<br>NA     | 1.000,<br>-0.0498,<br>0.0067,<br>NA     | 0.997,<br>-0.0299,<br>0.0068,<br>NA     | 0.332,<br>-0.0100,<br>0.0068,<br>NA     | 0.056,<br>0.0000,<br>0.0068,<br>NA      | 0.327,<br>0.0100,<br>0.0069,<br>NA      | 0.991,<br>0.0299,<br>0.0069,<br>NA      | 1.000,<br>0.0498,<br>0.0070,<br>NA      | 1.000,<br>0.0996,<br>0.0072,<br>NA      |
| MR-Lasso           | 1.000,<br>-0.0996,<br>0.0066,<br>0.0062 | 1.000,<br>-0.0498,<br>0.0066,<br>0.0063 | 0.996,<br>-0.0299,<br>0.0066,<br>0.0064 | 0.368,<br>-0.0100,<br>0.0067,<br>0.0064 | 0.067,<br>0.0000,<br>0.0068,<br>0.0065  | 0.341,<br>0.0099,<br>0.0068,<br>0.0065  | 0.998,<br>0.0298,<br>0.0068,<br>0.0066  | 1.000,<br>0.0498,<br>0.0069,<br>0.0066  | 1.000,<br>0.0996,<br>0.0070,<br>0.0068  |
| MR-PRESSO          | 1.000,<br>-0.0993,<br>0.0117,<br>0.006  | 0.991,<br>-0.0496,<br>0.0116,<br>0.0061 | 0.953,<br>-0.0298,<br>0.0115,<br>0.0061 | 0.453,<br>-0.0099,<br>0.0114,<br>0.0062 | 0.198,<br>0.0000,<br>0.0114,<br>0.0062  | 0.429,<br>0.0100,<br>0.0114,<br>0.0062  | 0.957,<br>0.0299,<br>0.0113,<br>0.0063  | 0.993,<br>0.0497,<br>0.0113,<br>0.0063  | 1.000,<br>0.0994,<br>0.0112,<br>0.0065  |
| MR-IVW             | 0.277,<br>-0.0987,<br>0.0778,<br>0.0737 | 0.127,<br>-0.0487,<br>0.0777,<br>0.0737 | 0.078,<br>-0.0287,<br>0.0777,<br>0.0737 | 0.060,<br>-0.0087,<br>0.0777,<br>0.0737 | 0.062,<br>0.0013,<br>0.0777,<br>0.0737  | 0.073,<br>0.0112,<br>0.0777,<br>0.0737  | 0.094,<br>0.0312,<br>0.0777,<br>0.0737  | 0.121,<br>0.0512,<br>0.0777,<br>0.0737  | 0.296,<br>0.1012,<br>0.0776,<br>0.0737  |
| MR-IVW-Oracle      | 1.000,<br>-0.0996,<br>0.0062,<br>0.0063 | 1.000,<br>-0.0498,<br>0.0062,<br>0.0064 | 0.999,<br>-0.0299,<br>0.0063,<br>0.0065 | 0.345,<br>-0.0100,<br>0.0063,<br>0.0065 | 0.044,<br>0.0000,<br>0.0064,<br>0.0066  | 0.327,<br>0.0100,<br>0.0064,<br>0.0066  | 0.997,<br>0.0299,<br>0.0064,<br>0.0067  | 1.000,<br>0.0498,<br>0.0065,<br>0.0067  | 1.000,<br>0.0996,<br>0.0067,<br>0.0069  |
| MR-Egger           | 0.067,<br>-0.1045,<br>0.3841,<br>0.3757 | 0.063,<br>-0.0589,<br>0.3840,<br>0.3757 | 0.058,<br>-0.0406,<br>0.3840,<br>0.3757 | 0.053,<br>-0.0224,<br>0.3839,<br>0.3757 | 0.052,<br>-0.0133,<br>0.3839,<br>0.3757 | 0.049,<br>-0.0041,<br>0.3839,<br>0.3757 | 0.047,<br>0.0141,<br>0.3839,<br>0.3757  | 0.045,<br>0.0323,<br>0.3839,<br>0.3757  | 0.055,<br>0.0779,<br>0.3838,<br>0.3757  |
| MR-Weighted-Median | 1.000,<br>-0.0982,<br>0.0080,<br>0.009  | 1.000,<br>-0.0491,<br>0.0082,<br>0.0092 | 0.922,<br>-0.0295,<br>0.0082,<br>0.0092 | 0.153,<br>-0.0099,<br>0.0083,<br>0.0093 | 0.033,<br>-0.0001,<br>0.0083,<br>0.0093 | 0.142,<br>0.0098,<br>0.0083,<br>0.0094  | 0.898,<br>0.0294,<br>0.0084,<br>0.0094  | 1.000,<br>0.0491,<br>0.0086,<br>0.0095  | 1.000,<br>0.0981,<br>0.0088,<br>0.0098  |
| MR-Weighted-Mode   | 1.000,<br>-0.0987,<br>0.0122,<br>0.0158 | 0.918,<br>-0.0493,<br>0.0122,<br>0.016  | 0.439,<br>-0.0297,<br>0.0125,<br>0.0161 | 0.036,<br>-0.0101,<br>0.0124,<br>0.0163 | 0.005,<br>-0.0002,<br>0.0125,<br>0.0163 | 0.034,<br>0.0098,<br>0.0127,<br>0.0164  | 0.433,<br>0.0295,<br>0.0129,<br>0.0165  | 0.874,<br>0.0492,<br>0.0130,<br>0.0167  | 1.000,<br>0.0984,<br>0.0136,<br>0.0172  |
| MR-RAPS1           | 0.280,<br>-0.0983,<br>0.0751,<br>0.0735 | 0.112,<br>-0.0483,<br>0.0751,<br>0.0735 | 0.075,<br>-0.0283,<br>0.0751,<br>0.0735 | 0.060,<br>-0.0083,<br>0.0751,<br>0.0735 | 0.058,<br>0.0017,<br>0.0751,<br>0.0735  | 0.063,<br>0.0117,<br>0.0751,<br>0.0735  | 0.077,<br>0.0317,<br>0.0751,<br>0.0735  | 0.118,<br>0.0517,<br>0.0751,<br>0.0735  | 0.290,<br>0.1017,<br>0.0751,<br>0.0736  |
| MR-RAPS2           | 0.999,<br>0.4861,<br>2.3093,<br>0.0294  | 1.000,<br>0.1562,<br>1.9727,<br>0.0089  | 0.999,<br>0.0588,<br>1.2278,<br>0.0089  | 0.810,<br>0.0250,<br>0.7413,<br>0.0088  | 0.702,<br>0.0143,<br>0.7838,<br>0.0092  | 0.808,<br>0.0186,<br>0.7571,<br>0.0089  | 1.000,<br>-0.0578,<br>1.3944,<br>0.0092 | 1.000,<br>-0.0977,<br>1.3736,<br>0.0092 | 1.000,<br>-0.2143,<br>1.8828,<br>0.0103 |
| MR-RAPS3           | 0.953,<br>-0.2591,<br>0.1907,<br>0.0158 | 0.908,<br>-0.1249,<br>0.1963,<br>0.0155 | 0.907,<br>-0.0723,<br>0.1951,<br>0.0153 | 0.897,<br>-0.0214,<br>0.1900,<br>0.015  | 0.904,<br>0.0034,<br>0.1900,<br>0.0149  | 0.900,<br>0.0276,<br>0.1876,<br>0.0147  | 0.883,<br>0.0741,<br>0.1821,<br>0.0145  | 0.906,<br>0.1182,<br>0.1760,<br>0.0142  | 0.943,<br>0.2172,<br>0.1595,<br>0.0135  |
| MR-RAPS4           | 1.000,<br>0.4068,<br>0.7992,<br>0.0107  | 1.000,<br>0.2108,<br>0.8180,<br>0.0096  | 0.999,<br>0.1523,<br>0.8198,<br>0.0094  | 0.934,<br>0.0743,<br>0.8509,<br>0.0097  | 0.885,<br>0.0572,<br>0.8755,<br>0.0098  | 0.920,<br>0.0582,<br>0.8647,<br>0.0096  | 1.000,<br>-0.0247,<br>0.8465,<br>0.0095 | 1.000,<br>-0.0852,<br>0.8816,<br>0.0098 | 1.000,<br>-0.2750,<br>0.8467,<br>0.01   |

Table S73: Main simulations: in each cell, from top to bottom are empirical type-I error/power, mean( $\hat{\theta}$ ), SD( $\hat{\theta}$ ), mean(SE( $\hat{\theta}$ )) when  $m = 100$ , the InSIDE satisfied,  $q = 0.2$ , and  $n = 200000$ .

| Methods \ $\theta$ | -0.1                                    | -0.05                                   | -0.03                                   | -0.01                                   | 0                                       | 0.01                                    | 0.03                                   | 0.05                                   | 0.1                                    |
|--------------------|-----------------------------------------|-----------------------------------------|-----------------------------------------|-----------------------------------------|-----------------------------------------|-----------------------------------------|----------------------------------------|----------------------------------------|----------------------------------------|
| cML-MA-AIC         | 1.000,<br>-0.0988,<br>0.0064,<br>0.0052 | 1.000,<br>-0.0491,<br>0.0065,<br>0.0053 | 0.995,<br>-0.0291,<br>0.0066,<br>0.0053 | 0.438,<br>-0.0094,<br>0.0063,<br>0.0053 | 0.075,<br>-0.0002,<br>0.0059,<br>0.0053 | 0.413,<br>0.0090,<br>0.0063,<br>0.0054  | 0.991,<br>0.0288,<br>0.0067,<br>0.0055 | 1.000,<br>0.0487,<br>0.0067,<br>0.0055 | 1.000,<br>0.0985,<br>0.0069,<br>0.0057 |
| cML-MA-AIC-Profile | 1.000,<br>-0.0991,<br>0.0065,<br>0.0052 | 1.000,<br>-0.0491,<br>0.0066,<br>0.0053 | 0.995,<br>-0.0292,<br>0.0066,<br>0.0053 | 0.438,<br>-0.0094,<br>0.0063,<br>0.0053 | 0.075,<br>-0.0002,<br>0.0059,<br>0.0053 | 0.413,<br>0.0090,<br>0.0063,<br>0.0054  | 0.991,<br>0.0288,<br>0.0067,<br>0.0055 | 1.000,<br>0.0488,<br>0.0068,<br>0.0055 | 1.000,<br>0.0987,<br>0.0069,<br>0.0057 |
| cML-AIC            | 1.000,<br>-0.0995,<br>0.0067,<br>0.0048 | 1.000,<br>-0.0497,<br>0.0067,<br>0.0048 | 0.996,<br>-0.0297,<br>0.0069,<br>0.0049 | 0.507,<br>-0.0098,<br>0.0068,<br>0.0049 | 0.151,<br>-0.0002,<br>0.0066,<br>0.0049 | 0.495,<br>0.0094,<br>0.0068,<br>0.005   | 0.995,<br>0.0293,<br>0.0070,<br>0.005  | 1.000,<br>0.0492,<br>0.0071,<br>0.0051 | 1.000,<br>0.0991,<br>0.0072,<br>0.0052 |
| cML-AIC-Profile    | 1.000,<br>-0.0997,<br>0.0068,<br>0.0048 | 1.000,<br>-0.0497,<br>0.0067,<br>0.0049 | 0.996,<br>-0.0297,<br>0.0069,<br>0.0049 | 0.505,<br>-0.0098,<br>0.0068,<br>0.0049 | 0.151,<br>-0.0002,<br>0.0066,<br>0.0049 | 0.495,<br>0.0094,<br>0.0068,<br>0.005   | 0.995,<br>0.0293,<br>0.0070,<br>0.005  | 1.000,<br>0.0493,<br>0.0071,<br>0.0051 | 1.000,<br>0.0993,<br>0.0072,<br>0.0052 |
| cML-MA-BIC         | 1.000,<br>-0.1000,<br>0.0044,<br>0.0044 | 1.000,<br>-0.0500,<br>0.0044,<br>0.0045 | 1.000,<br>-0.0301,<br>0.0045,<br>0.0045 | 0.608,<br>-0.0101,<br>0.0045,<br>0.0045 | 0.046,<br>-0.0001,<br>0.0045,<br>0.0046 | 0.581,<br>0.0099,<br>0.0046,<br>0.0046  | 1.000,<br>0.0299,<br>0.0046,<br>0.0046 | 1.000,<br>0.0499,<br>0.0047,<br>0.0047 | 1.000,<br>0.0999,<br>0.0048,<br>0.0048 |
| cML-MA-BIC-Profile | 1.000,<br>-0.1000,<br>0.0044,<br>0.0044 | 1.000,<br>-0.0500,<br>0.0044,<br>0.0045 | 1.000,<br>-0.0301,<br>0.0045,<br>0.0045 | 0.608,<br>-0.0101,<br>0.0045,<br>0.0046 | 0.046,<br>-0.0001,<br>0.0045,<br>0.0046 | 0.579,<br>0.0099,<br>0.0046,<br>0.0046  | 1.000,<br>0.0299,<br>0.0046,<br>0.0046 | 1.000,<br>0.0499,<br>0.0047,<br>0.0047 | 1.000,<br>0.0999,<br>0.0048,<br>0.0048 |
| cML-BIC            | 1.000,<br>-0.1000,<br>0.0044,<br>0.0044 | 1.000,<br>-0.0501,<br>0.0045,<br>0.0044 | 1.000,<br>-0.0301,<br>0.0045,<br>0.0045 | 0.615,<br>-0.0101,<br>0.0045,<br>0.0045 | 0.048,<br>-0.0001,<br>0.0045,<br>0.0045 | 0.581,<br>0.0099,<br>0.0046,<br>0.0045  | 1.000,<br>0.0299,<br>0.0046,<br>0.0046 | 1.000,<br>0.0499,<br>0.0047,<br>0.0046 | 1.000,<br>0.0999,<br>0.0048,<br>0.0048 |
| cML-BIC-Profile    | 1.000,<br>-0.1000,<br>0.0044,<br>0.0044 | 1.000,<br>-0.0501,<br>0.0045,<br>0.0045 | 1.000,<br>-0.0301,<br>0.0045,<br>0.0045 | 0.613,<br>-0.0101,<br>0.0045,<br>0.0045 | 0.048,<br>-0.0001,<br>0.0045,<br>0.0045 | 0.581,<br>0.0099,<br>0.0046,<br>0.0046  | 1.000,<br>0.0299,<br>0.0046,<br>0.0046 | 1.000,<br>0.0499,<br>0.0047,<br>0.0046 | 1.000,<br>0.0999,<br>0.0048,<br>0.0048 |
| MR-Mix             | 0.998,<br>-0.1105,<br>0.0079,<br>0.0119 | 0.993,<br>-0.0543,<br>0.0079,<br>0.0118 | 0.866,<br>-0.0324,<br>0.0079,<br>0.0118 | 0.083,<br>-0.0108,<br>0.0079,<br>0.0117 | 0.005,<br>0.0000,<br>0.0079,<br>0.0117  | 0.091,<br>0.0107,<br>0.0080,<br>0.0116  | 0.842,<br>0.0318,<br>0.0081,<br>0.0116 | 0.994,<br>0.0523,<br>0.0081,<br>0.0116 | 1.000,<br>0.1018,<br>0.0081,<br>0.0115 |
| MR-ContMix         | 1.000,<br>-0.0999,<br>0.0045,<br>NA     | 1.000,<br>-0.0500,<br>0.0045,<br>NA     | 1.000,<br>-0.0300,<br>0.0046,<br>NA     | 0.589,<br>-0.0101,<br>0.0046,<br>NA     | 0.051,<br>-0.0001,<br>0.0046,<br>NA     | 0.559,<br>0.0099,<br>0.0047,<br>NA      | 1.000,<br>0.0299,<br>0.0047,<br>NA     | 1.000,<br>0.0498,<br>0.0048,<br>NA     | 1.000,<br>0.0998,<br>0.0050,<br>NA     |
| MR-Lasso           | 1.000,<br>-0.0998,<br>0.0046,<br>0.0044 | 1.000,<br>-0.0499,<br>0.0046,<br>0.0045 | 1.000,<br>-0.0299,<br>0.0046,<br>0.0045 | 0.597,<br>-0.0100,<br>0.0047,<br>0.0046 | 0.059,<br>0.0000,<br>0.0047,<br>0.0046  | 0.587,<br>0.0100,<br>0.0047,<br>0.0046  | 1.000,<br>0.0299,<br>0.0047,<br>0.0046 | 1.000,<br>0.0499,<br>0.0048,<br>0.0047 | 1.000,<br>0.0997,<br>0.0050,<br>0.0048 |
| MR-PRESSO          | 0.998,<br>-0.0996,<br>0.0149,<br>0.0045 | 0.982,<br>-0.0498,<br>0.0145,<br>0.0045 | 0.941,<br>-0.0299,<br>0.0144,<br>0.0046 | 0.646,<br>-0.0100,<br>0.0144,<br>0.0046 | 0.341,<br>0.0000,<br>0.0143,<br>0.0046  | 0.638,<br>0.0100,<br>0.0142,<br>0.0046  | 0.939,<br>0.0299,<br>0.0142,<br>0.0046 | 0.988,<br>0.0498,<br>0.0140,<br>0.0047 | 1.000,<br>0.0996,<br>0.0136,<br>0.0048 |
| MR-IVW             | 0.304,<br>-0.1005,<br>0.0758,<br>0.0739 | 0.116,<br>-0.0504,<br>0.0758,<br>0.0739 | 0.084,<br>-0.0304,<br>0.0758,<br>0.0739 | 0.055,<br>-0.0104,<br>0.0758,<br>0.0739 | 0.054,<br>-0.0003,<br>0.0758,<br>0.0739 | 0.063,<br>0.0097,<br>0.0758,<br>0.0739  | 0.075,<br>0.0297,<br>0.0758,<br>0.0739 | 0.113,<br>0.0497,<br>0.0758,<br>0.0739 | 0.272,<br>0.0998,<br>0.0758,<br>0.0739 |
| MR-IVW-Oracle      | 1.000,<br>-0.0999,<br>0.0044,<br>0.0045 | 1.000,<br>-0.0500,<br>0.0044,<br>0.0046 | 1.000,<br>-0.0300,<br>0.0045,<br>0.0046 | 0.594,<br>-0.0100,<br>0.0045,<br>0.0046 | 0.042,<br>-0.0001,<br>0.0045,<br>0.0047 | 0.563,<br>0.0099,<br>0.0045,<br>0.0047  | 1.000,<br>0.0299,<br>0.0046,<br>0.0047 | 1.000,<br>0.0498,<br>0.0046,<br>0.0048 | 1.000,<br>0.0997,<br>0.0048,<br>0.0049 |
| MR-Egger           | 0.069,<br>-0.1074,<br>0.3914,<br>0.3839 | 0.074,<br>-0.0596,<br>0.3913,<br>0.3838 | 0.068,<br>-0.0405,<br>0.3913,<br>0.3838 | 0.070,<br>-0.0214,<br>0.3912,<br>0.3838 | 0.069,<br>-0.0119,<br>0.3912,<br>0.3838 | 0.071,<br>-0.0023,<br>0.3912,<br>0.3838 | 0.068,<br>0.0168,<br>0.3912,<br>0.3838 | 0.065,<br>0.0358,<br>0.3911,<br>0.3838 | 0.062,<br>0.0836,<br>0.3911,<br>0.3837 |
| MR-Weighted-Median | 1.000,<br>-0.0991,<br>0.0056,<br>0.0064 | 1.000,<br>-0.0496,<br>0.0057,<br>0.0065 | 0.998,<br>-0.0298,<br>0.0057,<br>0.0065 | 0.310,<br>-0.0100,<br>0.0057,<br>0.0066 | 0.017,<br>0.0000,<br>0.0058,<br>0.0066  | 0.297,<br>0.0099,<br>0.0058,<br>0.0066  | 0.998,<br>0.0297,<br>0.0058,<br>0.0067 | 1.000,<br>0.0495,<br>0.0059,<br>0.0067 | 1.000,<br>0.0990,<br>0.0061,<br>0.0069 |
| MR-Weighted-Mode   | 1.000,<br>-0.0992,<br>0.0089,<br>0.0113 | 0.999,<br>-0.0497,<br>0.0089,<br>0.0114 | 0.779,<br>-0.0297,<br>0.0089,<br>0.0115 | 0.090,<br>-0.0100,<br>0.0090,<br>0.0116 | 0.008,<br>0.0000,<br>0.0090,<br>0.0116  | 0.080,<br>0.0100,<br>0.0092,<br>0.0117  | 0.765,<br>0.0297,<br>0.0093,<br>0.0118 | 0.996,<br>0.0495,<br>0.0094,<br>0.0119 | 1.000,<br>0.0991,<br>0.0093,<br>0.0122 |
| MR-RAPS1           | 0.299,<br>-0.1011,<br>0.0740,<br>0.0735 | 0.113,<br>-0.0511,<br>0.0741,<br>0.0735 | 0.075,<br>-0.0311,<br>0.0741,<br>0.0735 | 0.053,<br>-0.0111,<br>0.0741,<br>0.0735 | 0.053,<br>-0.0011,<br>0.0741,<br>0.0735 | 0.055,<br>0.0089,<br>0.0741,<br>0.0735  | 0.080,<br>0.0289,<br>0.0741,<br>0.0735 | 0.105,<br>0.0489,<br>0.0741,<br>0.0735 | 0.255,<br>0.0989,<br>0.0741,<br>0.0735 |
| MR-RAPS2           | 1.000,<br>0.4682,<br>2.3725,<br>0.0083  | 1.000,<br>0.1663,<br>0.6543,<br>0.0056  | 1.000,<br>0.1104,<br>0.9236,<br>0.0057  | 0.890,<br>0.1789,<br>0.7864,<br>0.0057  | 0.673,<br>0.2385,<br>1.1421,<br>0.0062  | 0.872,<br>0.1537,<br>0.9202,<br>0.0061  | 1.000,<br>0.2206,<br>1.0497,<br>0.0063 | 1.000,<br>0.2140,<br>1.1501,<br>0.0069 | 1.000,<br>0.1425,<br>1.4071,<br>0.0069 |
| MR-RAPS3           | 0.962,<br>-0.2666,<br>0.1861,<br>0.0113 | 0.929,<br>-0.1304,<br>0.1924,<br>0.0111 | 0.911,<br>-0.0771,<br>0.1914,<br>0.0109 | 0.924,<br>-0.0253,<br>0.1886,<br>0.0107 | 0.927,<br>-0.0002,<br>0.1866,<br>0.0106 | 0.920,<br>0.0243,<br>0.1843,<br>0.0105  | 0.937,<br>0.0715,<br>0.1789,<br>0.0103 | 0.924,<br>0.1161,<br>0.1728,<br>0.0101 | 0.960,<br>0.2162,<br>0.1563,<br>0.0096 |
| MR-RAPS4           | 1.000,<br>0.5604,<br>0.5218,<br>0.0064  | 1.000,<br>0.4130,<br>0.6567,<br>0.0064  | 1.000,<br>0.3588,<br>0.6698,<br>0.0064  | 0.975,<br>0.3056,<br>0.6875,<br>0.0063  | 0.927,<br>0.2747,<br>0.6698,<br>0.006   | 0.970,<br>0.2826,<br>0.7208,<br>0.0062  | 1.000,<br>0.2625,<br>0.7754,<br>0.0066 | 1.000,<br>0.2126,<br>0.7782,<br>0.0064 | 1.000,<br>0.0270,<br>0.8856,<br>0.0069 |

Table S74: Main simulations: in each cell, from top to bottom are empirical type-I error/power, mean( $\hat{\theta}$ ), SD( $\hat{\theta}$ ), mean(SE( $\hat{\theta}$ )) when  $m = 100$ , the InSIDE satisfied,  $q = 0.4$ , and  $n = 50000$ .

| Methods \ $\theta$ | -0.1                                    | -0.05                                   | -0.03                                   | -0.01                                   | 0                                             | 0.01                                    | 0.03                                    | 0.05                                    | 0.1                                     |
|--------------------|-----------------------------------------|-----------------------------------------|-----------------------------------------|-----------------------------------------|-----------------------------------------------|-----------------------------------------|-----------------------------------------|-----------------------------------------|-----------------------------------------|
| cML-MA-AIC         | 1.000,<br>-0.0964,<br>0.0164,<br>0.0132 | 0.886,<br>-0.0467,<br>0.0166,<br>0.0134 | 0.516,<br>-0.0270,<br>0.0163,<br>0.0134 | 0.136,<br>-0.0083,<br>0.0153,<br>0.0134 | 0.079,<br>0.0005,<br>0.0151,<br>0.0134        | 0.155,<br>0.0094,<br>0.0155,<br>0.0135  | 0.533,<br>0.0280,<br>0.0167,<br>0.0137  | 0.870,<br>0.0475,<br>0.0173,<br>0.0139  | 1.000,<br>0.0971,<br>0.0176,<br>0.0142  |
| cML-MA-AIC-Profile | 1.000,<br>-0.0969,<br>0.0165,<br>0.0135 | 0.884,<br>-0.0468,<br>0.0167,<br>0.0135 | 0.509,<br>-0.0271,<br>0.0163,<br>0.0135 | 0.133,<br>-0.0083,<br>0.0153,<br>0.0134 | 0.076,<br>0.0005,<br>0.0151,<br>0.0135        | 0.151,<br>0.0094,<br>0.0155,<br>0.0136  | 0.525,<br>0.0280,<br>0.0168,<br>0.0138  | 0.868,<br>0.0476,<br>0.0174,<br>0.014   | 1.000,<br>0.0975,<br>0.0177,<br>0.0144  |
| cML-AIC            | 1.000,<br>-0.0983,<br>0.0169,<br>0.012  | 0.924,<br>-0.0485,<br>0.0175,<br>0.0121 | 0.609,<br>-0.0285,<br>0.0175,<br>0.0122 | 0.227,<br>-0.0090,<br>0.0172,<br>0.0123 | 0.154,<br>0.0006,<br>0.0172,<br>0.0123        | 0.234,<br>0.0101,<br>0.0174,<br>0.0124  | 0.611,<br>0.0296,<br>0.0180,<br>0.0125  | 0.917,<br>0.0495,<br>0.0181,<br>0.0126  | 1.000,<br>0.0990,<br>0.0184,<br>0.0129  |
| cML-AIC-Profile    | 1.000,<br>-0.0986,<br>0.0172,<br>0.0121 | 0.924,<br>-0.0486,<br>0.0176,<br>0.0122 | 0.607,<br>-0.0286,<br>0.0175,<br>0.0123 | 0.223,<br>-0.0090,<br>0.0172,<br>0.0124 | 0.150,<br>0.0006,<br>0.0172,<br>0.0124        | 0.229,<br>0.0101,<br>0.0174,<br>0.0125  | 0.606,<br>0.0296,<br>0.0180,<br>0.0126  | 0.915,<br>0.0496,<br>0.0182,<br>0.0127  | 1.000,<br>0.0993,<br>0.0185,<br>0.013   |
| cML-MA-BIC         | 1.000,<br>-0.1000,<br>0.0113,<br>0.0111 | 0.995,<br>-0.0499,<br>0.0114,<br>0.0112 | 0.739,<br>-0.0299,<br>0.0115,<br>0.0113 | 0.147,<br>-0.0099,<br>0.0116,<br>0.0114 | 0.053,<br>0.0001,<br>0.0116,<br>0.0114        | 0.151,<br>0.0101,<br>0.0116,<br>0.0115  | 0.733,<br>0.0301,<br>0.0118,<br>0.0115  | 0.989,<br>0.0501,<br>0.0119,<br>0.0116  | 1.000,<br>0.1002,<br>0.0121,<br>0.0119  |
| cML-MA-BIC-Profile | 1.000,<br>-0.1000,<br>0.0113,<br>0.0112 | 0.995,<br>-0.0499,<br>0.0114,<br>0.0113 | 0.738,<br>-0.0299,<br>0.0115,<br>0.0113 | 0.145,<br>-0.0099,<br>0.0116,<br>0.0114 | 0.051,<br>0.0001,<br>0.0116,<br>0.0115        | 0.148,<br>0.0101,<br>0.0116,<br>0.0115  | 0.732,<br>0.0301,<br>0.0118,<br>0.0116  | 0.989,<br>0.0501,<br>0.0119,<br>0.0117  | 1.000,<br>0.1002,<br>0.0121,<br>0.012   |
| cML-BIC            | 1.000,<br>-0.1000,<br>0.0113,<br>0.011  | 0.994,<br>-0.0500,<br>0.0114,<br>0.0111 | 0.752,<br>-0.0299,<br>0.0115,<br>0.0112 | 0.161,<br>-0.0099,<br>0.0116,<br>0.0113 | 0.053,<br>0.0001,<br>0.0116,<br>0.0113        | 0.155,<br>0.0101,<br>0.0116,<br>0.0114  | 0.744,<br>0.0301,<br>0.0117,<br>0.0114  | 0.989,<br>0.0501,<br>0.0118,<br>0.0115  | 1.000,<br>0.1002,<br>0.0121,<br>0.0118  |
| cML-BIC-Profile    | 1.000,<br>-0.1000,<br>0.0113,<br>0.0111 | 0.994,<br>-0.0500,<br>0.0114,<br>0.0112 | 0.749,<br>-0.0299,<br>0.0115,<br>0.0112 | 0.158,<br>-0.0099,<br>0.0116,<br>0.0113 | 0.052,<br>0.0001,<br>0.0116,<br>0.0114        | 0.153,<br>0.0101,<br>0.0116,<br>0.0114  | 0.744,<br>0.0301,<br>0.0117,<br>0.0115  | 0.989,<br>0.0501,<br>0.0118,<br>0.0116  | 1.000,<br>0.1002,<br>0.0121,<br>0.0119  |
| MR-Mix             | 1.000,<br>-0.1019,<br>0.0128,<br>0.0168 | 0.886,<br>-0.0503,<br>0.0129,<br>0.0167 | 0.403,<br>-0.0300,<br>0.0128,<br>0.0166 | 0.042,<br>-0.0102,<br>0.0128,<br>0.0166 | 0.012,<br>-0.0002,<br>0.0128,<br>0.0166       | 0.034,<br>0.0096,<br>0.0128,<br>0.0165  | 0.391,<br>0.0291,<br>0.0128,<br>0.0165  | 0.873,<br>0.0483,<br>0.0128,<br>0.0165  | 1.000,<br>0.0945,<br>0.0129,<br>0.0164  |
| MR-ContMix         | 1.000,<br>-0.0991,<br>0.0120,<br>NA     | 0.985,<br>-0.0494,<br>0.0121,<br>NA     | 0.704,<br>-0.0295,<br>0.0122,<br>NA     | 0.146,<br>-0.0097,<br>0.0123,<br>NA     | 0.052,<br>0.0003,<br>0.0124,<br>NA            | 0.161,<br>0.0102,<br>0.0124,<br>NA      | 0.696,<br>0.0301,<br>0.0126,<br>NA      | 0.983,<br>0.0500,<br>0.0128,<br>NA      | 1.000,<br>0.0996,<br>0.0131,<br>NA      |
| MR-Lasso           | 1.000,<br>-0.0992,<br>0.0120,<br>0.0111 | 0.988,<br>-0.0496,<br>0.0121,<br>0.0113 | 0.730,<br>-0.0297,<br>0.0122,<br>0.0113 | 0.152,<br>-0.0098,<br>0.0122,<br>0.0114 | 0.066,<br>0.0001,<br>0.0122,<br>0.0115        | 0.162,<br>0.0101,<br>0.0122,<br>0.0115  | 0.725,<br>0.0299,<br>0.0123,<br>0.0116  | 0.981,<br>0.0498,<br>0.0123,<br>0.0117  | 1.000,<br>0.0995,<br>0.0128,<br>0.0119  |
| MR-PRESSO          | 1.000,<br>-0.0987,<br>0.0160,<br>0.0107 | 0.962,<br>-0.0491,<br>0.0158,<br>0.0108 | 0.713,<br>-0.0293,<br>0.0158,<br>0.0109 | 0.215,<br>-0.0095,<br>0.0157,<br>0.011  | 0.141,<br>0.0004,<br>0.0157,<br>0.011         | 0.223,<br>0.0103,<br>0.0157,<br>0.0111  | 0.707,<br>0.0301,<br>0.0156,<br>0.0112  | 0.965,<br>0.0499,<br>0.0155,<br>0.0112  | 1.000,<br>0.0995,<br>0.0155,<br>0.0115  |
| MR-IVW             | 0.152,<br>-0.0955,<br>0.1052,<br>0.1044 | 0.079,<br>-0.0454,<br>0.1051,<br>0.1044 | 0.062,<br>-0.0255,<br>0.1051,<br>0.1044 | 0.057,<br>-0.0055,<br>0.1051,<br>0.1044 | 0.055,<br>0.0045,<br>0.1051,<br>0.1044        | 0.054,<br>0.0145,<br>0.1051,<br>0.1044  | 0.067,<br>0.0345,<br>0.1051,<br>0.1044  | 0.081,<br>0.0545,<br>0.1051,<br>0.1044  | 0.169,<br>0.1044,<br>0.1051,<br>0.1044  |
| MR-IVW-Oracle      | 1.000,<br>-0.0994,<br>0.0111,<br>0.0113 | 0.995,<br>-0.0497,<br>0.0112,<br>0.0115 | 0.728,<br>-0.0298,<br>0.0113,<br>0.0115 | 0.133,<br>-0.0099,<br>0.0114,<br>0.0116 | 0.045,<br>0.0001,<br>0.0114,<br>0.0117        | 0.134,<br>0.0100,<br>0.0115,<br>0.0117  | 0.710,<br>0.0299,<br>0.0116,<br>0.0118  | 0.990,<br>0.0498,<br>0.0117,<br>0.0119  | 1.000,<br>0.0995,<br>0.0120,<br>0.0121  |
| MR-Egger           | 0.054,<br>-0.0669,<br>0.5198,<br>0.5085 | 0.055,<br>-0.0252,<br>0.5199,<br>0.5085 | 0.056,<br>-0.0086,<br>0.5199,<br>0.5085 | 0.054,<br>0.0081,<br>0.5200,<br>0.5085  | 0.055,<br>0.0164,<br>0.5200,<br>0.5085        | 0.054,<br>0.0248,<br>0.5200,<br>0.5085  | 0.058,<br>0.0414,<br>0.5201,<br>0.5086  | 0.060,<br>0.0581,<br>0.5201,<br>0.5086  | 0.062,<br>0.0997,<br>0.5202,<br>0.5086  |
| MR-Weighted-Median | 1.000,<br>-0.0950,<br>0.0144,<br>0.016  | 0.847,<br>-0.0470,<br>0.0147,<br>0.0162 | 0.386,<br>-0.0278,<br>0.0148,<br>0.0163 | 0.060,<br>-0.0086,<br>0.0149,<br>0.0164 | 0.031,<br>0.0009,<br>0.0149,<br>0.0164        | 0.073,<br>0.0105,<br>0.0150,<br>0.0165  | 0.435,<br>0.0295,<br>0.0151,<br>0.0166  | 0.839,<br>0.0486,<br>0.0153,<br>0.0167  | 1.000,<br>0.0965,<br>0.0157,<br>0.0171  |
| MR-Weighted-Mode   | 0.999,<br>-0.0963,<br>0.0152,<br>0.0175 | 0.799,<br>-0.0481,<br>0.0154,<br>0.0177 | 0.337,<br>-0.0285,<br>0.0153,<br>0.0178 | 0.054,<br>-0.0092,<br>0.0156,<br>0.0179 | 0.022,<br>0.0008,<br>0.0158,<br>0.018         | 0.064,<br>0.0107,<br>0.0159,<br>0.0181  | 0.381,<br>0.0299,<br>0.0160,<br>0.0182  | 0.788,<br>0.0493,<br>0.0158,<br>0.0183  | 1.000,<br>0.0981,<br>0.0162,<br>0.0188  |
| MR-RAPS1           | 0.150,<br>-0.0960,<br>0.1040,<br>0.1045 | 0.077,<br>-0.0459,<br>0.1040,<br>0.1045 | 0.061,<br>-0.0259,<br>0.1040,<br>0.1045 | 0.056,<br>-0.0059,<br>0.1041,<br>0.1045 | 0.055,<br>0.0041,<br>0.1041,<br>0.1045        | 0.057,<br>0.0142,<br>0.1041,<br>0.1045  | 0.055,<br>0.0342,<br>0.1041,<br>0.1045  | 0.071,<br>0.0542,<br>0.1041,<br>0.1045  | 0.167,<br>0.1042,<br>0.1041,<br>0.1045  |
| MR-RAPS2           | 0.137,<br>-0.0954,<br>0.1067,<br>0.1088 | 0.065,<br>-0.0454,<br>0.1067,<br>0.1088 | 0.057,<br>-0.0253,<br>0.1067,<br>0.1088 | 0.053,<br>-0.0053,<br>0.1067,<br>0.1088 | 0.049,<br>0.0047,<br>0.1067,<br>0.1088        | 0.051,<br>0.0147,<br>0.1068,<br>0.1088  | 0.051,<br>0.0347,<br>0.1068,<br>0.1089  | 0.070,<br>0.0547,<br>0.1068,<br>0.1089  | 0.157,<br>0.1048,<br>0.1068,<br>0.1089  |
| MR-RAPS3           | 0.903,<br>-1.6334,<br>20.9243,<br>26.1  | 0.877,<br>-2.7050,<br>94.0318,<br>1013  | 0.871,<br>0.1730,<br>21.7599,<br>39.08  | 0.883,<br>0.2818,<br>10.2006,<br>10.77  | 0.886,<br>265.5101,<br>8383.5654,<br>29550000 | 0.895,<br>-0.8724,<br>24.3864,<br>209.2 | 0.877,<br>1.3031,<br>27.4717,<br>70.51  | 0.878,<br>-0.2543,<br>42.4199,<br>183.8 | 0.926,<br>0.7809,<br>3.4360,<br>3.107   |
| MR-RAPS4           | 1.000,<br>0.6516,<br>0.7891,<br>0.0192  | 1.000,<br>0.4592,<br>1.1766,<br>0.0226  | 0.987,<br>0.3194,<br>1.3089,<br>0.024   | 0.931,<br>0.1129,<br>1.3928,<br>0.025   | 0.929,<br>0.0299,<br>1.4239,<br>0.0259        | 0.953,<br>-0.0816,<br>1.4285,<br>0.026  | 0.988,<br>-0.2905,<br>1.4087,<br>0.0264 | 0.999,<br>-0.4865,<br>1.3267,<br>0.0263 | 1.000,<br>-0.9263,<br>0.9757,<br>0.0265 |



Table S75: Main simulations: in each cell, from top to bottom are empirical type-I error/power, mean( $\hat{\theta}$ ), SD( $\hat{\theta}$ ), mean(SE( $\hat{\theta}$ )) when  $m = 100$ , the InSIDE satisfied,  $q = 0.4$ , and  $n = 100000$ .

| Methods \ $\theta$ | -0.1                                      | -0.05                                     | -0.03                                    | -0.01                                      | 0                                         | 0.01                                      | 0.03                                       | 0.05                                     | 0.1                                     |
|--------------------|-------------------------------------------|-------------------------------------------|------------------------------------------|--------------------------------------------|-------------------------------------------|-------------------------------------------|--------------------------------------------|------------------------------------------|-----------------------------------------|
| cML-MA-AIC         | 1.000,<br>-0.0975,<br>0.0108,<br>0.0094   | 0.991,<br>-0.0478,<br>0.0109,<br>0.0095   | 0.798,<br>-0.0280,<br>0.0109,<br>0.0095  | 0.171,<br>-0.0088,<br>0.0102,<br>0.0095    | 0.061,<br>0.0000,<br>0.0098,<br>0.0095    | 0.163,<br>0.0089,<br>0.0102,<br>0.0096    | 0.785,<br>0.0279,<br>0.0112,<br>0.0097     | 0.994,<br>0.0478,<br>0.0114,<br>0.0098   | 1.000,<br>0.0974,<br>0.0117,<br>0.0101  |
| cML-MA-AIC-Profile | 1.000,<br>-0.0978,<br>0.0109,<br>0.0094   | 0.991,<br>-0.0479,<br>0.0110,<br>0.0095   | 0.795,<br>-0.0280,<br>0.0109,<br>0.0096  | 0.169,<br>-0.0088,<br>0.0102,<br>0.0095    | 0.061,<br>0.0000,<br>0.0098,<br>0.0095    | 0.161,<br>0.0089,<br>0.0102,<br>0.0096    | 0.783,<br>0.0280,<br>0.0113,<br>0.0098     | 0.994,<br>0.0479,<br>0.0115,<br>0.0099   | 1.000,<br>0.0977,<br>0.0118,<br>0.0101  |
| cML-AIC            | 1.000,<br>-0.0988,<br>0.0114,<br>0.0085   | 0.994,<br>-0.0490,<br>0.0115,<br>0.0086   | 0.864,<br>-0.0291,<br>0.0116,<br>0.0086  | 0.248,<br>-0.0094,<br>0.0114,<br>0.0087    | 0.123,<br>0.0001,<br>0.0112,<br>0.0087    | 0.261,<br>0.0095,<br>0.0114,<br>0.0087    | 0.841,<br>0.0291,<br>0.0119,<br>0.0088     | 0.996,<br>0.0490,<br>0.0120,<br>0.0089   | 1.000,<br>0.0987,<br>0.0123,<br>0.0091  |
| cML-AIC-Profile    | 1.000,<br>-0.0990,<br>0.0115,<br>0.0085   | 0.994,<br>-0.0490,<br>0.0115,<br>0.0086   | 0.864,<br>-0.0291,<br>0.0116,<br>0.0087  | 0.247,<br>-0.0094,<br>0.0114,<br>0.0087    | 0.122,<br>0.0001,<br>0.0112,<br>0.0087    | 0.257,<br>0.0095,<br>0.0114,<br>0.0088    | 0.840,<br>0.0291,<br>0.0120,<br>0.0088     | 0.996,<br>0.0491,<br>0.0120,<br>0.0089   | 1.000,<br>0.0989,<br>0.0124,<br>0.0091  |
| cML-MA-BIC         | 1.000,<br>-0.0999,<br>0.0078,<br>0.0078   | 1.000,<br>-0.0499,<br>0.0079,<br>0.0079   | 0.961,<br>-0.0299,<br>0.0080,<br>0.008   | 0.216,<br>-0.0099,<br>0.0080,<br>0.008     | 0.059,<br>0.0001,<br>0.0081,<br>0.0081    | 0.231,<br>0.0101,<br>0.0081,<br>0.0081    | 0.956,<br>0.0300,<br>0.0082,<br>0.0082     | 1.000,<br>0.0500,<br>0.0083,<br>0.0082   | 1.000,<br>0.1000,<br>0.0085,<br>0.0084  |
| cML-MA-BIC-Profile | 1.000,<br>-0.0999,<br>0.0078,<br>0.0079   | 1.000,<br>-0.0499,<br>0.0079,<br>0.0079   | 0.961,<br>-0.0299,<br>0.0080,<br>0.008   | 0.215,<br>-0.0099,<br>0.0080,<br>0.008     | 0.058,<br>0.0001,<br>0.0081,<br>0.0081    | 0.230,<br>0.0101,<br>0.0081,<br>0.0081    | 0.956,<br>0.0300,<br>0.0082,<br>0.0082     | 1.000,<br>0.0500,<br>0.0083,<br>0.0082   | 1.000,<br>0.1000,<br>0.0085,<br>0.0084  |
| cML-BIC            | 1.000,<br>-0.0999,<br>0.0078,<br>0.0078   | 1.000,<br>-0.0499,<br>0.0079,<br>0.0079   | 0.965,<br>-0.0299,<br>0.0080,<br>0.0079  | 0.226,<br>-0.0099,<br>0.0080,<br>0.008     | 0.061,<br>0.0001,<br>0.0081,<br>0.008     | 0.237,<br>0.0101,<br>0.0081,<br>0.008     | 0.961,<br>0.0301,<br>0.0082,<br>0.0081     | 1.000,<br>0.0501,<br>0.0083,<br>0.0082   | 1.000,<br>0.1001,<br>0.0085,<br>0.0084  |
| cML-BIC-Profile    | 1.000,<br>-0.0999,<br>0.0078,<br>0.0078   | 1.000,<br>-0.0499,<br>0.0079,<br>0.0079   | 0.965,<br>-0.0299,<br>0.0080,<br>0.0079  | 0.225,<br>-0.0099,<br>0.0080,<br>0.008     | 0.061,<br>0.0001,<br>0.0081,<br>0.008     | 0.236,<br>0.0101,<br>0.0081,<br>0.008     | 0.961,<br>0.0301,<br>0.0082,<br>0.0081     | 1.000,<br>0.0501,<br>0.0083,<br>0.0082   | 1.000,<br>0.1001,<br>0.0085,<br>0.0084  |
| MR-Mix             | 1.000,<br>-0.1014,<br>0.0102,<br>0.0131   | 0.984,<br>-0.0497,<br>0.0101,<br>0.013    | 0.638,<br>-0.0294,<br>0.0101,<br>0.013   | 0.054,<br>-0.0095,<br>0.0101,<br>0.013     | 0.013,<br>0.0004,<br>0.0101,<br>0.013     | 0.052,<br>0.0103,<br>0.0101,<br>0.013     | 0.653,<br>0.0295,<br>0.0101,<br>0.013      | 0.981,<br>0.0486,<br>0.0101,<br>0.013    | 1.000,<br>0.0948,<br>0.0101,<br>0.0129  |
| MR-ContMix         | 1.000,<br>-0.0996,<br>0.0081,<br>NA       | 1.000,<br>-0.0499,<br>0.0082,<br>NA       | 0.951,<br>-0.0299,<br>0.0082,<br>NA      | 0.225,<br>-0.0100,<br>0.0083,<br>NA        | 0.056,<br>0.0000,<br>0.0083,<br>NA        | 0.218,<br>0.0099,<br>0.0083,<br>NA        | 0.941,<br>0.0298,<br>0.0084,<br>NA         | 1.000,<br>0.0497,<br>0.0085,<br>NA       | 1.000,<br>0.0996,<br>0.0087,<br>NA      |
| MR-Lasso           | 1.000,<br>-0.0996,<br>0.0081,<br>0.0079   | 1.000,<br>-0.0497,<br>0.0083,<br>0.008    | 0.953,<br>-0.0298,<br>0.0082,<br>0.008   | 0.219,<br>-0.0099,<br>0.0083,<br>0.0081    | 0.062,<br>0.0001,<br>0.0083,<br>0.0081    | 0.236,<br>0.0100,<br>0.0083,<br>0.0082    | 0.945,<br>0.0300,<br>0.0084,<br>0.0082     | 1.000,<br>0.0498,<br>0.0085,<br>0.0083   | 1.000,<br>0.0996,<br>0.0087,<br>0.0085  |
| MR-PRESSO          | 0.994,<br>-0.0993,<br>0.0193,<br>0.0078   | 0.964,<br>-0.0497,<br>0.0191,<br>0.0078   | 0.865,<br>-0.0299,<br>0.0190,<br>0.0079  | 0.378,<br>-0.0100,<br>0.0189,<br>0.0079    | 0.255,<br>-0.0001,<br>0.0189,<br>0.0079   | 0.381,<br>0.0099,<br>0.0188,<br>0.008     | 0.872,<br>0.0297,<br>0.0188,<br>0.008      | 0.962,<br>0.0495,<br>0.0187,<br>0.0081   | 1.000,<br>0.0992,<br>0.0183,<br>0.0083  |
| MR-IVW             | 0.173,<br>-0.0974,<br>0.1075,<br>0.1046   | 0.089,<br>-0.0473,<br>0.1075,<br>0.1046   | 0.065,<br>-0.0272,<br>0.1075,<br>0.1046  | 0.054,<br>-0.0072,<br>0.1075,<br>0.1046    | 0.051,<br>0.0028,<br>0.1075,<br>0.1046    | 0.054,<br>0.0129,<br>0.1075,<br>0.1046    | 0.065,<br>0.0329,<br>0.1075,<br>0.1046     | 0.081,<br>0.0529,<br>0.1075,<br>0.1046   | 0.182,<br>0.1030,<br>0.1075,<br>0.1046  |
| MR-IVW-Oracle      | 1.000,<br>-0.0995,<br>0.0078,<br>0.008    | 1.000,<br>-0.0497,<br>0.0079,<br>0.0081   | 0.957,<br>-0.0298,<br>0.0079,<br>0.0082  | 0.205,<br>-0.0099,<br>0.0080,<br>0.0082    | 0.054,<br>0.0001,<br>0.0080,<br>0.0082    | 0.212,<br>0.0100,<br>0.0080,<br>0.0083    | 0.952,<br>0.0299,<br>0.0081,<br>0.0083     | 1.000,<br>0.0499,<br>0.0082,<br>0.0084   | 1.000,<br>0.0997,<br>0.0084,<br>0.0086  |
| MR-Egger           | 0.058,<br>-0.0666,<br>0.5538,<br>0.5323   | 0.056,<br>-0.0210,<br>0.5536,<br>0.5323   | 0.059,<br>-0.0028,<br>0.5536,<br>0.5323  | 0.060,<br>0.0154,<br>0.5535,<br>0.5323     | 0.061,<br>0.0245,<br>0.5535,<br>0.5323    | 0.062,<br>0.0337,<br>0.5535,<br>0.5323    | 0.061,<br>0.0519,<br>0.5534,<br>0.5323     | 0.062,<br>0.0701,<br>0.5534,<br>0.5323   | 0.070,<br>0.1157,<br>0.5532,<br>0.5323  |
| MR-Weighted-Median | 1.000,<br>-0.0972,<br>0.0097,<br>0.0113   | 0.996,<br>-0.0485,<br>0.0098,<br>0.0114   | 0.755,<br>-0.0290,<br>0.0099,<br>0.0115  | 0.101,<br>-0.0096,<br>0.0100,<br>0.0116    | 0.022,<br>0.0001,<br>0.0100,<br>0.0116    | 0.101,<br>0.0099,<br>0.0101,<br>0.0117    | 0.745,<br>0.0294,<br>0.0102,<br>0.0118     | 0.991,<br>0.0489,<br>0.0103,<br>0.0119   | 1.000,<br>0.0974,<br>0.0107,<br>0.0121  |
| MR-Weighted-Mode   | 1.000,<br>-0.0985,<br>0.0105,<br>0.0127   | 0.985,<br>-0.0492,<br>0.0105,<br>0.0128   | 0.659,<br>-0.0296,<br>0.0106,<br>0.0129  | 0.073,<br>-0.0100,<br>0.0107,<br>0.013     | 0.016,<br>0.0000,<br>0.0107,<br>0.0131    | 0.063,<br>0.0098,<br>0.0108,<br>0.0131    | 0.631,<br>0.0295,<br>0.0108,<br>0.0132     | 0.980,<br>0.0491,<br>0.0109,<br>0.0133   | 1.000,<br>0.0982,<br>0.0113,<br>0.0136  |
| MR-RAPS1           | 0.160,<br>-0.0971,<br>0.1043,<br>0.1042   | 0.083,<br>-0.0471,<br>0.1043,<br>0.1042   | 0.063,<br>-0.0271,<br>0.1043,<br>0.1042  | 0.050,<br>-0.0071,<br>0.1043,<br>0.1042    | 0.050,<br>0.0029,<br>0.1044,<br>0.1042    | 0.048,<br>0.0129,<br>0.1044,<br>0.1042    | 0.056,<br>0.0329,<br>0.1044,<br>0.1042     | 0.073,<br>0.0529,<br>0.1044,<br>0.1042   | 0.168,<br>0.1029,<br>0.1044,<br>0.1042  |
| MR-RAPS2           | 0.141,<br>-0.0971,<br>0.1066,<br>0.1086   | 0.077,<br>-0.0471,<br>0.1066,<br>0.1086   | 0.059,<br>-0.0271,<br>0.1067,<br>0.1086  | 0.051,<br>-0.0071,<br>0.1067,<br>0.1086    | 0.045,<br>0.0029,<br>0.1067,<br>0.1086    | 0.045,<br>0.0129,<br>0.1067,<br>0.1086    | 0.048,<br>0.0329,<br>0.1067,<br>0.1086     | 0.071,<br>0.0529,<br>0.1067,<br>0.1086   | 0.158,<br>0.1029,<br>0.1067,<br>0.1086  |
| MR-RAPS3           | 0.935,<br>1.0078,<br>54.5723,<br>112.8361 | 0.917,<br>-1.0769,<br>18.1137,<br>20.2496 | 0.904,<br>0.0886,<br>16.8509,<br>35.9937 | 0.920,<br>-9.5900,<br>257.8822,<br>4776.09 | 0.922,<br>-0.2141,<br>18.4052,<br>23.2109 | 0.908,<br>1.7566,<br>98.5441,<br>434.4651 | 0.905,<br>-1.6525,<br>58.2242,<br>227.5009 | 0.925,<br>0.3291,<br>10.2074,<br>10.9039 | 0.950,<br>0.5993,<br>7.0298,<br>4.1958  |
| MR-RAPS4           | 1.000,<br>0.7188,<br>0.7983,<br>0.0152    | 1.000,<br>0.4751,<br>1.2327,<br>0.0177    | 1.000,<br>0.2858,<br>1.3645,<br>0.0185   | 0.954,<br>0.0889,<br>1.4189,<br>0.0188     | 0.940,<br>-0.0493,<br>1.4598,<br>0.0194   | 0.957,<br>-0.1988,<br>1.4411,<br>0.0193   | 0.997,<br>-0.3921,<br>1.3655,<br>0.0189    | 1.000,<br>-0.6596,<br>1.2877,<br>0.0199  | 1.000,<br>-0.9944,<br>0.8920,<br>0.0188 |

Table S76: Main simulations: in each cell, from top to bottom are empirical type-I error/power, mean( $\hat{\theta}$ ), SD( $\hat{\theta}$ ), mean(SE( $\hat{\theta}$ )) when  $m = 100$ , the InSIDE satisfied,  $q = 0.4$ , and  $n = 200000$ .

| Methods \ $\theta$ | -0.1                                 | -0.05                            | -0.03                            | -0.01                             | 0                                 | 0.01                            | 0.03                           | 0.05                           | 0.1                            |
|--------------------|--------------------------------------|----------------------------------|----------------------------------|-----------------------------------|-----------------------------------|---------------------------------|--------------------------------|--------------------------------|--------------------------------|
| cML-MA-AIC         | 1.000, -0.0988, 0.0078, 0.0066       | 1.000, -0.0489, 0.0079, 0.0067   | 0.970, -0.0290, 0.0079, 0.0067   | 0.301, -0.0093, 0.0075, 0.0067    | 0.068, -0.0003, 0.0071, 0.0067    | 0.279, 0.0087, 0.0075, 0.0067   | 0.955, 0.0282, 0.0081, 0.0069  | 1.000, 0.0482, 0.0081, 0.0069  | 1.000, 0.0979, 0.0084, 0.0071  |
| cML-MA-AIC-Profile | 1.000, -0.0990, 0.0079, 0.0066       | 1.000, -0.0490, 0.0079, 0.0067   | 0.970, -0.0290, 0.0079, 0.0067   | 0.300, -0.0093, 0.0075, 0.0067    | 0.068, -0.0003, 0.0071, 0.0067    | 0.278, 0.0087, 0.0075, 0.0068   | 0.955, 0.0283, 0.0081, 0.0069  | 1.000, 0.0482, 0.0082, 0.0069  | 1.000, 0.0981, 0.0084, 0.0071  |
| cML-AIC            | 1.000, -0.0996, 0.0083, 0.006        | 1.000, -0.0498, 0.0083, 0.0061   | 0.982, -0.0298, 0.0085, 0.0061   | 0.409, -0.0100, 0.0083, 0.0061    | 0.146, -0.0004, 0.0081, 0.0062    | 0.379, 0.0092, 0.0083, 0.0062   | 0.969, 0.0290, 0.0085, 0.0062  | 1.000, 0.0490, 0.0086, 0.0063  | 1.000, 0.0988, 0.0088, 0.0064  |
| cML-AIC-Profile    | 1.000, -0.0997, 0.0082, 0.006        | 1.000, -0.0498, 0.0083, 0.0061   | 0.982, -0.0298, 0.0085, 0.0061   | 0.407, -0.0100, 0.0083, 0.0061    | 0.146, -0.0004, 0.0081, 0.0062    | 0.379, 0.0092, 0.0083, 0.0062   | 0.969, 0.0290, 0.0085, 0.0062  | 1.000, 0.0490, 0.0086, 0.0063  | 1.000, 0.0990, 0.0088, 0.0064  |
| cML-MA-BIC         | 1.000, -0.1000, 0.0054, 0.0055       | 1.000, -0.0500, 0.0055, 0.0056   | 1.000, -0.0300, 0.0056, 0.0056   | 0.406, -0.0100, 0.0056, 0.0057    | 0.047, 0.0000, 0.0056, 0.0057     | 0.426, 0.0100, 0.0057, 0.0057   | 0.999, 0.0300, 0.0057, 0.0058  | 1.000, 0.0500, 0.0058, 0.0058  | 1.000, 0.1000, 0.0060, 0.0059  |
| cML-MA-BIC-Profile | 1.000, -0.1000, 0.0055, 0.0055       | 1.000, -0.0500, 0.0055, 0.0056   | 1.000, -0.0300, 0.0056, 0.0056   | 0.405, -0.0100, 0.0056, 0.0057    | 0.047, 0.0000, 0.0056, 0.0057     | 0.426, 0.0100, 0.0057, 0.0057   | 0.999, 0.0300, 0.0057, 0.0058  | 1.000, 0.0500, 0.0058, 0.0058  | 1.000, 0.1000, 0.0060, 0.0059  |
| cML-BIC            | 1.000, -0.1000, 0.0054, 0.0055       | 1.000, -0.0500, 0.0055, 0.0056   | 1.000, -0.0300, 0.0056, 0.0056   | 0.413, -0.0100, 0.0056, 0.0056    | 0.047, 0.0000, 0.0056, 0.0057     | 0.438, 0.0100, 0.0057, 0.0057   | 0.999, 0.0300, 0.0057, 0.0057  | 1.000, 0.0500, 0.0058, 0.0058  | 1.000, 0.1000, 0.0060, 0.0059  |
| cML-BIC-Profile    | 1.000, -0.1000, 0.0054, 0.0055       | 1.000, -0.0500, 0.0055, 0.0056   | 1.000, -0.0300, 0.0056, 0.0056   | 0.412, -0.0100, 0.0056, 0.0056    | 0.047, 0.0000, 0.0056, 0.0057     | 0.438, 0.0100, 0.0057, 0.0057   | 0.999, 0.0300, 0.0057, 0.0057  | 1.000, 0.0500, 0.0058, 0.0058  | 1.000, 0.1000, 0.0060, 0.0059  |
| MR-Mix             | 1.000, -0.1016, 0.0076, 0.0103       | 0.999, -0.0499, 0.0075, 0.0102   | 0.896, -0.0297, 0.0075, 0.0102   | 0.147, -0.0097, 0.0075, 0.0102    | 0.024, 0.0002, 0.0076, 0.0102     | 0.171, 0.0100, 0.0075, 0.0102   | 0.870, 0.0294, 0.0075, 0.0101  | 0.998, 0.0487, 0.0075, 0.0101  | 1.000, 0.0950, 0.0077, 0.01    |
| MR-ContMix         | 1.000, -0.0998, 0.0056, NA           | 1.000, -0.0499, 0.0057, NA       | 1.000, -0.0299, 0.0057, NA       | 0.403, -0.0100, 0.0058, NA        | 0.051, 0.0000, 0.0058, NA         | 0.427, 0.0100, 0.0058, NA       | 0.999, 0.0300, 0.0059, NA      | 1.000, 0.0500, 0.0060, NA      | 1.000, 0.0999, 0.0061, NA      |
| MR-Lasso           | 1.000, -0.0997, 0.0057, 0.0056       | 1.000, -0.0499, 0.0058, 0.0056   | 0.998, -0.0299, 0.0058, 0.0057   | 0.402, -0.0100, 0.0059, 0.0057    | 0.053, 0.0000, 0.0059, 0.0057     | 0.423, 0.0100, 0.0059, 0.0058   | 0.996, 0.0299, 0.0060, 0.0058  | 1.000, 0.0499, 0.0061, 0.0059  | 1.000, 0.0998, 0.0063, 0.006   |
| MR-PRESSO          | 0.986, -0.1011, 0.0268, 0.0062       | 0.946, -0.0514, 0.0268, 0.0063   | 0.901, -0.0316, 0.0267, 0.0063   | 0.581, -0.0117, 0.0265, 0.0063    | 0.417, -0.0017, 0.0265, 0.0064    | 0.551, 0.0083, 0.0265, 0.0064   | 0.880, 0.0282, 0.0263, 0.0064  | 0.940, 0.0481, 0.0261, 0.0064  | 1.000, 0.0977, 0.0240, 0.0064  |
| MR-IVW             | 0.178, -0.1085, 0.1047, 0.1045       | 0.088, -0.0583, 0.1046, 0.1045   | 0.072, -0.0382, 0.1046, 0.1045   | 0.062, -0.0181, 0.1046, 0.1045    | 0.056, -0.0081, 0.1046, 0.1045    | 0.058, 0.0020, 0.1046, 0.1045   | 0.060, 0.0220, 0.1046, 0.1045  | 0.067, 0.0421, 0.1046, 0.1045  | 0.139, 0.0923, 0.1046, 0.1045  |
| MR-IVW-Oracle      | 1.000, -0.0998, 0.0054, 0.0057       | 1.000, -0.0499, 0.0055, 0.0057   | 0.999, -0.0299, 0.0055, 0.0058   | 0.392, -0.0100, 0.0056, 0.0058    | 0.046, 0.0000, 0.0056, 0.0058     | 0.407, 0.0100, 0.0056, 0.0058   | 0.998, 0.0300, 0.0057, 0.0059  | 1.000, 0.0499, 0.0058, 0.0059  | 1.000, 0.0999, 0.0059, 0.0061  |
| MR-Egger           | 0.052, -0.1017, 0.5651, 0.5433       | 0.052, -0.0538, 0.5650, 0.5433   | 0.049, -0.0346, 0.5650, 0.5432   | 0.048, -0.0155, 0.5650, 0.5432    | 0.051, -0.0059, 0.5650, 0.5432    | 0.051, 0.0036, 0.5650, 0.5432   | 0.056, 0.0228, 0.5649, 0.5432  | 0.057, 0.0419, 0.5649, 0.5432  | 0.060, 0.0897, 0.5649, 0.5432  |
| MR-Weighted-Median | 1.000, -0.0988, 0.0069, 0.008        | 1.000, -0.0495, 0.0070, 0.0081   | 0.973, -0.0297, 0.0071, 0.0081   | 0.212, -0.0101, 0.0071, 0.0082    | 0.020, -0.0002, 0.0072, 0.0082    | 0.194, 0.0096, 0.0072, 0.0082   | 0.964, 0.0293, 0.0073, 0.0083  | 1.000, 0.0490, 0.0073, 0.0084  | 1.000, 0.0981, 0.0075, 0.0086  |
| MR-Weighted-Mode   | 1.000, -0.0994, 0.0078, 0.0092       | 1.000, -0.0499, 0.0078, 0.0093   | 0.939, -0.0301, 0.0079, 0.0094   | 0.169, -0.0102, 0.0081, 0.0094    | 0.018, -0.0003, 0.0081, 0.0095    | 0.129, 0.0096, 0.0083, 0.0095   | 0.892, 0.0293, 0.0082, 0.0096  | 1.000, 0.0494, 0.0083, 0.0096  | 1.000, 0.0990, 0.0084, 0.0099  |
| MR-RAPS1           | 0.174, -0.1081, 0.1021, 0.1039       | 0.090, -0.0580, 0.1021, 0.1039   | 0.067, -0.0380, 0.1021, 0.1039   | 0.055, -0.0180, 0.1021, 0.1039    | 0.054, -0.0080, 0.1021, 0.1039    | 0.052, 0.0020, 0.1021, 0.1039   | 0.052, 0.0220, 0.1021, 0.1039  | 0.059, 0.0420, 0.1021, 0.1039  | 0.141, 0.0920, 0.1021, 0.104   |
| MR-RAPS2           | 0.235, -0.1037, 0.0920, 0.0941       | 0.099, -0.0579, 0.0978, 0.1013   | 0.068, -0.0379, 0.0994, 0.1031   | 0.050, -0.0183, 0.0999, 0.1041    | 0.049, -0.0071, 0.0999, 0.104     | 0.049, 0.0036, 0.1008, 0.1042   | 0.054, 0.0226, 0.1020, 0.1036  | 0.069, 0.0430, 0.1019, 0.1033  | 0.145, 0.0928, 0.1029, 0.1046  |
| MR-RAPS3           | 0.959, -11.1622, 305.9594, 4762.2712 | 0.933, 0.0348, 82.3958, 192.1699 | 0.943, -1.2186, 27.7718, 38.7595 | 0.939, 3.9690, 108.9560, 642.0259 | 0.929, 6.1388, 132.5582, 687.2719 | 0.924, 0.4160, 18.3534, 16.9941 | 0.945, -0.0042, 6.3809, 4.2503 | 0.944, 0.5246, 15.979, 41.5097 | 0.956, 0.7122, 3.7180, 1.7861  |
| MR-RAPS4           | 0.999, 0.9192, 1.2784, 0.033         | 1.000, 0.6188, 1.4998, 0.021     | 1.000, 0.3922, 1.6113, 0.019     | 0.974, 0.0502, 1.6427, 0.017      | 0.959, -0.0907, 1.6392, 0.0168    | 0.976, -0.2073, 1.6216, 0.0166  | 1.000, -0.5334, 1.5125, 0.016  | 1.000, -0.7904, 1.3714, 0.0158 | 1.000, -1.0600, 0.8739, 0.0138 |

Table S77: Main simulations: in each cell, from top to bottom are empirical type-I error/power, mean( $\hat{\theta}$ ), SD( $\hat{\theta}$ ), mean(SE( $\hat{\theta}$ )) when  $m = 100$ , the InSIDE satisfied,  $q = 0.6$ , and  $n = 50000$ .

| Methods \ $\theta$ | -0.1                                      | -0.05                                       | -0.03                                      | -0.01                                       | 0                                         | 0.01                                       | 0.03                                     | 0.05                                        | 0.1                                        |
|--------------------|-------------------------------------------|---------------------------------------------|--------------------------------------------|---------------------------------------------|-------------------------------------------|--------------------------------------------|------------------------------------------|---------------------------------------------|--------------------------------------------|
| cML-MA-AIC         | 0.995,<br>-0.0953,<br>0.0211,<br>0.0176   | 0.698,<br>-0.0458,<br>0.0212,<br>0.0177     | 0.331,<br>-0.0266,<br>0.0205,<br>0.0176    | 0.114,<br>-0.0088,<br>0.0192,<br>0.0176     | 0.068,<br>-0.0004,<br>0.0190,<br>0.0176   | 0.093,<br>0.0083,<br>0.0193,<br>0.0178     | 0.352,<br>0.0261,<br>0.0207,<br>0.018    | 0.672,<br>0.0450,<br>0.0220,<br>0.0183      | 0.983,<br>0.0941,<br>0.0229,<br>0.0188     |
| cML-MA-AIC-Profile | 0.994,<br>-0.0956,<br>0.0213,<br>0.0177   | 0.698,<br>-0.0459,<br>0.0213,<br>0.0178     | 0.331,<br>-0.0267,<br>0.0205,<br>0.0178    | 0.113,<br>-0.0088,<br>0.0193,<br>0.0177     | 0.067,<br>-0.0004,<br>0.0190,<br>0.0178   | 0.092,<br>0.0083,<br>0.0193,<br>0.0179     | 0.345,<br>0.0262,<br>0.0207,<br>0.0181   | 0.667,<br>0.0451,<br>0.0220,<br>0.0184      | 0.983,<br>0.0945,<br>0.0230,<br>0.0189     |
| cML-AIC            | 0.999,<br>-0.0979,<br>0.0225,<br>0.0157   | 0.786,<br>-0.0481,<br>0.0223,<br>0.0159     | 0.431,<br>-0.0286,<br>0.0223,<br>0.016     | 0.197,<br>-0.0095,<br>0.0218,<br>0.0161     | 0.139,<br>-0.0003,<br>0.0218,<br>0.0161   | 0.163,<br>0.0092,<br>0.0220,<br>0.0162     | 0.460,<br>0.0282,<br>0.0228,<br>0.0163   | 0.740,<br>0.0478,<br>0.0234,<br>0.0164      | 0.994,<br>0.0972,<br>0.0236,<br>0.0167     |
| cML-AIC-Profile    | 0.999,<br>-0.0980,<br>0.0226,<br>0.0159   | 0.783,<br>-0.0482,<br>0.0226,<br>0.016      | 0.427,<br>-0.0286,<br>0.0223,<br>0.0161    | 0.194,<br>-0.0095,<br>0.0218,<br>0.0162     | 0.137,<br>-0.0003,<br>0.0218,<br>0.0162   | 0.163,<br>0.0092,<br>0.0220,<br>0.0163     | 0.453,<br>0.0282,<br>0.0228,<br>0.0164   | 0.739,<br>0.0478,<br>0.0235,<br>0.0165      | 0.994,<br>0.0974,<br>0.0238,<br>0.0168     |
| cML-MA-BIC         | 1.000,<br>-1.003,<br>0.0151,<br>0.0146    | 0.924,<br>-0.0504,<br>0.0153,<br>0.0148     | 0.524,<br>-0.0304,<br>0.0154,<br>0.0148    | 0.112,<br>-0.0104,<br>0.0154,<br>0.0149     | 0.059,<br>-0.0005,<br>0.0155,<br>0.015    | 0.112,<br>0.0095,<br>0.0155,<br>0.015      | 0.506,<br>0.0294,<br>0.0157,<br>0.0151   | 0.892,<br>0.0494,<br>0.0158,<br>0.0152      | 1.000,<br>0.0993,<br>0.0162,<br>0.0155     |
| cML-MA-BIC-Profile | 1.000,<br>-1.003,<br>0.0151,<br>0.0147    | 0.923,<br>-0.0504,<br>0.0153,<br>0.0148     | 0.521,<br>-0.0304,<br>0.0154,<br>0.0149    | 0.111,<br>-0.0104,<br>0.0154,<br>0.015      | 0.059,<br>-0.0005,<br>0.0155,<br>0.015    | 0.109,<br>0.0095,<br>0.0155,<br>0.0151     | 0.504,<br>0.0294,<br>0.0157,<br>0.0152   | 0.891,<br>0.0494,<br>0.0158,<br>0.0153      | 1.000,<br>0.0994,<br>0.0162,<br>0.0156     |
| cML-BIC            | 1.000,<br>-1.004,<br>0.0151,<br>0.0145    | 0.928,<br>-0.0504,<br>0.0153,<br>0.0146     | 0.533,<br>-0.0304,<br>0.0154,<br>0.0147    | 0.119,<br>-0.0105,<br>0.0155,<br>0.0148     | 0.063,<br>-0.0005,<br>0.0156,<br>0.0148   | 0.118,<br>0.0095,<br>0.0156,<br>0.0148     | 0.518,<br>0.0295,<br>0.0157,<br>0.015    | 0.895,<br>0.0495,<br>0.0158,<br>0.0151      | 1.000,<br>0.0994,<br>0.0162,<br>0.0154     |
| cML-BIC-Profile    | 1.000,<br>-1.004,<br>0.0151,<br>0.0145    | 0.928,<br>-0.0504,<br>0.0153,<br>0.0147     | 0.529,<br>-0.0304,<br>0.0154,<br>0.0147    | 0.117,<br>-0.0105,<br>0.0155,<br>0.0148     | 0.063,<br>-0.0005,<br>0.0156,<br>0.0149   | 0.118,<br>0.0095,<br>0.0156,<br>0.0149     | 0.516,<br>0.0295,<br>0.0157,<br>0.015    | 0.895,<br>0.0495,<br>0.0158,<br>0.0151      | 1.000,<br>0.0994,<br>0.0162,<br>0.0154     |
| MR-Mix             | 1.000,<br>-0.0950,<br>0.0151,<br>0.0171   | 0.803,<br>-0.0473,<br>0.0149,<br>0.017      | 0.334,<br>-0.0284,<br>0.0149,<br>0.017     | 0.054,<br>-0.0095,<br>0.0148,<br>0.017      | 0.033,<br>-0.0003,<br>0.0149,<br>0.017    | 0.050,<br>0.0087,<br>0.0148,<br>0.017      | 0.312,<br>0.0268,<br>0.0149,<br>0.017    | 0.758,<br>0.0445,<br>0.0151,<br>0.017       | 0.997,<br>0.0883,<br>0.0151,<br>0.017      |
| MR-ContMix         | 1.000,<br>-0.0996,<br>0.0157,<br>NA       | 0.917,<br>-0.0501,<br>0.0158,<br>NA         | 0.508,<br>-0.0304,<br>0.0158,<br>NA        | 0.108,<br>-0.0105,<br>0.0159,<br>NA         | 0.058,<br>-0.0006,<br>0.0160,<br>NA       | 0.105,<br>0.0094,<br>0.0160,<br>NA         | 0.484,<br>0.0292,<br>0.0162,<br>NA       | 0.881,<br>0.0491,<br>0.0163,<br>NA          | 0.999,<br>0.0987,<br>0.0167,<br>NA         |
| MR-Lasso           | 1.000,<br>-0.0995,<br>0.0155,<br>0.0148   | 0.915,<br>-0.0502,<br>0.0161,<br>0.0149     | 0.521,<br>-0.0302,<br>0.0161,<br>0.015     | 0.118,<br>-0.0103,<br>0.0162,<br>0.0151     | 0.067,<br>-0.0004,<br>0.0163,<br>0.0151   | 0.122,<br>0.0095,<br>0.0164,<br>0.0152     | 0.506,<br>0.0293,<br>0.0164,<br>0.0153   | 0.876,<br>0.0491,<br>0.0165,<br>0.0154      | 0.999,<br>0.0989,<br>0.0172,<br>0.0157     |
| MR-PRESSO          | 0.991,<br>-0.1010,<br>0.0241,<br>0.0141   | 0.879,<br>-0.0517,<br>0.0241,<br>0.0143     | 0.556,<br>-0.0319,<br>0.0241,<br>0.0143    | 0.243,<br>-0.0121,<br>0.0241,<br>0.0144     | 0.166,<br>-0.0022,<br>0.0242,<br>0.0145   | 0.207,<br>0.0077,<br>0.0241,<br>0.0145     | 0.511,<br>0.0274,<br>0.0239,<br>0.0146   | 0.819,<br>0.0472,<br>0.0239,<br>0.0147      | 0.980,<br>0.0967,<br>0.0236,<br>0.015      |
| MR-IVW             | 0.160,<br>-0.1092,<br>0.1371,<br>0.1276   | 0.102,<br>-0.0591,<br>0.1371,<br>0.1276     | 0.091,<br>-0.0391,<br>0.1371,<br>0.1276    | 0.079,<br>-0.0191,<br>0.1371,<br>0.1276     | 0.077,<br>-0.0091,<br>0.1371,<br>0.1276   | 0.071,<br>0.0009,<br>0.1371,<br>0.1276     | 0.073,<br>0.0209,<br>0.1371,<br>0.1276   | 0.076,<br>0.0409,<br>0.1371,<br>0.1276      | 0.123,<br>0.0909,<br>0.1370,<br>0.1276     |
| MR-IVW-Oracle      | 1.000,<br>-0.0996,<br>0.0150,<br>0.015    | 0.914,<br>-0.0500,<br>0.0151,<br>0.0151     | 0.500,<br>-0.0301,<br>0.0152,<br>0.0152    | 0.103,<br>-0.0103,<br>0.0153,<br>0.0153     | 0.053,<br>-0.0004,<br>0.0154,<br>0.0154   | 0.105,<br>0.0095,<br>0.0154,<br>0.0154     | 0.485,<br>0.0294,<br>0.0155,<br>0.0155   | 0.881,<br>0.0492,<br>0.0156,<br>0.0156      | 0.999,<br>0.0988,<br>0.0160,<br>0.0159     |
| MR-Egger           | 0.056,<br>-0.0827,<br>0.6337,<br>0.6235   | 0.047,<br>-0.0409,<br>0.6338,<br>0.6235     | 0.047,<br>-0.0242,<br>0.6338,<br>0.6235    | 0.050,<br>-0.0074,<br>0.6338,<br>0.6235     | 0.049,<br>0.0009,<br>0.6338,<br>0.6235    | 0.050,<br>0.0093,<br>0.6339,<br>0.6235     | 0.051,<br>0.0260,<br>0.6339,<br>0.6235   | 0.051,<br>0.0427,<br>0.6339,<br>0.6235      | 0.056,<br>0.0845,<br>0.6340,<br>0.6236     |
| MR-Weighted-Median | 0.994,<br>-0.0936,<br>0.0203,<br>0.0208   | 0.624,<br>-0.0471,<br>0.0205,<br>0.021      | 0.260,<br>-0.0285,<br>0.0205,<br>0.0211    | 0.064,<br>-0.0100,<br>0.0207,<br>0.0212     | 0.052,<br>-0.0008,<br>0.0208,<br>0.0213   | 0.071,<br>0.0084,<br>0.0209,<br>0.0213     | 0.247,<br>0.0270,<br>0.0211,<br>0.0215   | 0.558,<br>0.0455,<br>0.0214,<br>0.0216      | 0.982,<br>0.0917,<br>0.0223,<br>0.0221     |
| MR-Weighted-Mode   | 1.000,<br>-0.0966,<br>0.0179,<br>0.0176   | 0.787,<br>-0.0488,<br>0.0180,<br>0.0178     | 0.383,<br>-0.0295,<br>0.0177,<br>0.0179    | 0.097,<br>-0.0106,<br>0.0181,<br>0.018      | 0.058,<br>-0.0011,<br>0.0183,<br>0.018    | 0.086,<br>0.0084,<br>0.0184,<br>0.0181     | 0.345,<br>0.0278,<br>0.0188,<br>0.0182   | 0.732,<br>0.0469,<br>0.0189,<br>0.0183      | 0.999,<br>0.0948,<br>0.0195,<br>0.0188     |
| MR-RAPS1           | 0.158,<br>-0.1095,<br>0.1323,<br>0.1278   | 0.095,<br>-0.0595,<br>0.1323,<br>0.1278     | 0.079,<br>-0.0395,<br>0.1323,<br>0.1278    | 0.068,<br>-0.0195,<br>0.1323,<br>0.1278     | 0.064,<br>-0.0095,<br>0.1323,<br>0.1278   | 0.060,<br>0.0005,<br>0.1323,<br>0.1278     | 0.063,<br>0.0205,<br>0.1323,<br>0.1278   | 0.064,<br>0.0405,<br>0.1323,<br>0.1278      | 0.106,<br>0.0905,<br>0.1323,<br>0.1278     |
| MR-RAPS2           | 0.154,<br>-0.1105,<br>0.1474,<br>0.1398   | 0.099,<br>-0.0608,<br>0.1484,<br>0.1397     | 0.085,<br>-0.0405,<br>0.1474,<br>0.1398    | 0.072,<br>-0.0205,<br>0.1474,<br>0.1398     | 0.071,<br>-0.0105,<br>0.1474,<br>0.1398   | 0.067,<br>-0.0005,<br>0.1474,<br>0.1398    | 0.071,<br>0.0195,<br>0.1474,<br>0.1398   | 0.067,<br>0.0395,<br>0.1474,<br>0.1398      | 0.100,<br>0.0894,<br>0.1474,<br>0.1398     |
| MR-RAPS3           | 0.910,<br>-2.1143,<br>57.5230,<br>66.8294 | 0.886,<br>-0.7317,<br>115.9904,<br>275.8253 | 0.863,<br>-3.6738,<br>90.3998,<br>184.4749 | 0.854,<br>-2.4649,<br>190.1472,<br>847.3009 | 0.865,<br>-2.1861,<br>60.2495,<br>85.8505 | 0.867,<br>-2.4260,<br>127.6301,<br>441.303 | 0.890,<br>0.9557,<br>55.5136,<br>75.8285 | 0.885,<br>7.6228,<br>250.1111,<br>1644.7824 | 0.923,<br>-0.8295,<br>70.4745,<br>140.3801 |
| MR-RAPS4           | 1.000,<br>0.6525,<br>1.2628,<br>0.0287    | 1.000,<br>0.4226,<br>1.4593,<br>0.0302      | 1.000,<br>0.3563,<br>2.0883,<br>0.0538     | 1.000,<br>0.1760,<br>1.5444,<br>0.0312      | 0.997,<br>0.1625,<br>1.5643,<br>0.0316    | 0.998,<br>0.1393,<br>1.5965,<br>0.0326     | 0.999,<br>0.0387,<br>1.5797,<br>0.0309   | 1.000,<br>-0.0182,<br>1.4614,<br>0.028      | 1.000,<br>-0.2419,<br>1.3946,<br>0.0285    |

Table S78: Main simulations: in each cell, from top to bottom are empirical type-I error/power, mean( $\hat{\theta}$ ), SD( $\hat{\theta}$ ), mean( $SE(\hat{\theta})$ ) when  $m = 100$ , the InSIDE satisfied,  $q = 0.6$ , and  $n = 100000$ .

| Methods \ $\theta$ | -0.1                                         | -0.05                                     | -0.03                                      | -0.01                                     | 0                                         | 0.01                                      | 0.03                                       | 0.05                                       | 0.1                                               |
|--------------------|----------------------------------------------|-------------------------------------------|--------------------------------------------|-------------------------------------------|-------------------------------------------|-------------------------------------------|--------------------------------------------|--------------------------------------------|---------------------------------------------------|
| cML-MA-AIC         | 1.000,<br>-0.0966,<br>1.460e-02, 0.0124      | 0.923,<br>-0.0467,<br>1.470e-02, 0.0126   | 0.562,<br>-0.0270,<br>1.430e-02, 0.0126    | 0.109,<br>-0.0084,<br>1.330e-02, 0.0125   | 0.072,<br>0.0003,<br>1.310e-02, 0.0125    | 0.135,<br>0.0089,<br>1.360e-02, 0.0126    | 0.550,<br>0.0274,<br>1.490e-02, 0.0128     | 0.910,<br>0.0471,<br>1.550e-02, 0.013      | 1.000,<br>0.0969,<br>1.600e-02, 0.0133            |
| cML-MA-AIC-Profile | 1.000,<br>-0.0968,<br>1.470e-02, 0.0125      | 0.922,<br>-0.0467,<br>1.470e-02, 0.0126   | 0.560,<br>-0.0270,<br>1.440e-02, 0.0126    | 0.107,<br>-0.0084,<br>1.330e-02, 0.0125   | 0.071,<br>0.0003,<br>1.310e-02, 0.0125    | 0.131,<br>0.0089,<br>1.360e-02, 0.0126    | 0.548,<br>0.0274,<br>1.490e-02, 0.0128     | 0.909,<br>0.0471,<br>1.560e-02, 0.013      | 1.000,<br>0.0971,<br>1.610e-02, 0.0133            |
| cML-AIC            | 1.000,<br>-0.0985,<br>1.510e-02, 0.0111      | 0.958,<br>-0.0484,<br>1.510e-02, 0.0112   | 0.655,<br>-0.0285,<br>1.510e-02, 0.0113    | 0.203,<br>-0.0088,<br>1.490e-02, 0.0114   | 0.135,<br>0.0005,<br>1.480e-02, 0.0114    | 0.219,<br>0.0098,<br>1.500e-02, 0.0114    | 0.656,<br>0.0292,<br>1.580e-02, 0.0115     | 0.945,<br>0.0491,<br>1.610e-02, 0.0116     | 1.000,<br>0.0989,<br>1.680e-02, 0.0119            |
| cML-AIC-Profile    | 1.000,<br>-0.0986,<br>1.520e-02, 0.0112      | 0.958,<br>-0.0485,<br>1.510e-02, 0.0113   | 0.653,<br>-0.0285,<br>1.510e-02, 0.0113    | 0.200,<br>-0.0088,<br>1.490e-02, 0.0114   | 0.131,<br>0.0005,<br>1.480e-02, 0.0114    | 0.216,<br>0.0098,<br>1.500e-02, 0.0115    | 0.655,<br>0.0292,<br>1.580e-02, 0.0116     | 0.945,<br>0.0492,<br>1.620e-02, 0.0116     | 1.000,<br>0.0991,<br>1.680e-02, 0.0119            |
| cML-MA-BIC         | 1.000,<br>-0.1000,<br>1.030e-02, 0.0103      | 0.999,<br>-0.0500,<br>1.050e-02, 0.0104   | 0.803,<br>-0.0300,<br>1.050e-02, 0.0105    | 0.162,<br>-0.0100,<br>1.060e-02, 0.0105   | 0.042,<br>-0.0001,<br>1.060e-02, 0.0106   | 0.167,<br>0.0099,<br>1.070e-02, 0.0106    | 0.798,<br>0.0299,<br>1.080e-02, 0.0107     | 0.996,<br>0.0499,<br>1.090e-02, 0.0107     | 1.000,<br>0.0999,<br>1.120e-02, 0.011             |
| cML-MA-BIC-Profile | 1.000,<br>-0.1000,<br>1.030e-02, 0.0103      | 0.999,<br>-0.0500,<br>1.050e-02, 0.0104   | 0.801,<br>-0.0300,<br>1.050e-02, 0.0105    | 0.161,<br>-0.0100,<br>1.060e-02, 0.0105   | 0.042,<br>-0.0001,<br>1.060e-02, 0.0106   | 0.165,<br>0.0099,<br>1.070e-02, 0.0106    | 0.797,<br>0.0299,<br>1.080e-02, 0.0107     | 0.996,<br>0.0499,<br>1.090e-02, 0.0108     | 1.000,<br>0.0999,<br>1.120e-02, 0.011             |
| cML-BIC            | 1.000,<br>-0.1001,<br>1.030e-02, 0.0102      | 0.999,<br>-0.0500,<br>1.040e-02, 0.0103   | 0.806,<br>-0.0300,<br>1.050e-02, 0.0104    | 0.167,<br>-0.0101,<br>1.060e-02, 0.0104   | 0.043,<br>-0.0001,<br>1.060e-02, 0.0105   | 0.176,<br>0.0100,<br>1.070e-02, 0.0105    | 0.806,<br>0.0299,<br>1.080e-02, 0.0106     | 0.996,<br>0.0499,<br>1.090e-02, 0.0107     | 1.000,<br>0.0999,<br>1.120e-02, 0.0109            |
| cML-BIC-Profile    | 1.000,<br>-0.1001,<br>1.030e-02, 0.0102      | 0.999,<br>-0.0500,<br>1.040e-02, 0.0103   | 0.804,<br>-0.0300,<br>1.050e-02, 0.0104    | 0.167,<br>-0.0101,<br>1.060e-02, 0.0105   | 0.043,<br>-0.0001,<br>1.060e-02, 0.0105   | 0.176,<br>0.0100,<br>1.070e-02, 0.0105    | 0.804,<br>0.0299,<br>1.080e-02, 0.0106     | 0.996,<br>0.0499,<br>1.090e-02, 0.0107     | 1.000,<br>0.0999,<br>1.120e-02, 0.0109            |
| MR-Mix             | 1.000,<br>-0.0950,<br>1.060e-02, 0.0131      | 0.970,<br>-0.0468,<br>1.070e-02, 0.013    | 0.580,<br>-0.0281,<br>1.080e-02, 0.0129    | 0.066,<br>-0.0095,<br>1.090e-02, 0.0129   | 0.008,<br>-0.0001,<br>1.090e-02, 0.0129   | 0.053,<br>0.0090,<br>1.080e-02, 0.0129    | 0.544,<br>0.0271,<br>1.070e-02, 0.0129     | 0.968,<br>0.0451,<br>1.070e-02, 0.0129     | 1.000,<br>0.0999,<br>1.0890,<br>1.100e-02, 0.0129 |
| MR-ContMix         | 1.000,<br>-0.0995,<br>1.070e-02, NA          | 0.997,<br>-0.0498,<br>1.090e-02, NA       | 0.803,<br>-0.0299,<br>1.090e-02, NA        | 0.160,<br>-0.0100,<br>1.090e-02, NA       | 0.054,<br>0.0000,<br>1.100e-02, NA        | 0.172,<br>0.0099,<br>1.100e-02, NA        | 0.782,<br>0.0298,<br>1.120e-02, NA         | 0.994,<br>0.0497,<br>1.130e-02, NA         | 1.000,<br>0.0995,<br>1.160e-02, NA                |
| MR-Lasso           | 1.000,<br>-0.0996,<br>1.080e-02, 0.0105      | 0.996,<br>-0.0499,<br>1.100e-02, 0.0106   | 0.791,<br>-0.0299,<br>1.090e-02, 0.0106    | 0.167,<br>-0.0100,<br>1.110e-02, 0.0107   | 0.048,<br>0.0000,<br>1.120e-02, 0.0107    | 0.170,<br>0.0099,<br>1.130e-02, 0.0108    | 0.791,<br>0.0298,<br>1.140e-02, 0.0108     | 0.992,<br>0.0498,<br>1.150e-02, 0.0109     | 1.000,<br>0.0996,<br>1.160e-02, 0.0111            |
| MR-PRESSO          | 0.977,<br>-0.0997,<br>3.090e-02, 0.0107      | 0.917,<br>-0.0500,<br>3.060e-02, 0.0107   | 0.711,<br>-0.0301,<br>3.040e-02, 0.0108    | 0.347,<br>-0.0103,<br>3.030e-02, 0.0108   | 0.294,<br>-0.0003,<br>3.030e-02, 0.0108   | 0.355,<br>0.0096,<br>3.020e-02, 0.0109    | 0.734,<br>0.0295,<br>3.010e-02, 0.0109     | 0.908,<br>0.0497,<br>2.700e-02, 0.0109     | 0.980,<br>0.0992,<br>2.650e-02, 0.0111            |
| MR-IVW             | 0.139,<br>-0.1001,<br>1.356e-01, 0.1277      | 0.083,<br>-0.0499,<br>1.356e-01, 0.1277   | 0.071,<br>-0.0298,<br>1.356e-01, 0.1277    | 0.069,<br>-0.0097,<br>1.356e-01, 0.1277   | 0.067,<br>0.0003,<br>1.356e-01, 0.1277    | 0.068,<br>0.0104,<br>1.356e-01, 0.1277    | 0.069,<br>0.0305,<br>1.356e-01, 0.1277     | 0.084,<br>0.0505,<br>1.356e-01, 0.1277     | 0.135,<br>0.1007,<br>1.355e-01, 0.1277            |
| MR-IVW-Oracle      | 1.000,<br>-0.0997,<br>1.020e-02, 0.0106      | 0.999,<br>-0.0499,<br>1.030e-02, 0.0107   | 0.786,<br>-0.0299,<br>1.040e-02, 0.0108    | 0.150,<br>-0.0100,<br>1.050e-02, 0.0108   | 0.033,<br>-0.0001,<br>1.050e-02, 0.0109   | 0.147,<br>0.0099,<br>1.060e-02, 0.0109    | 0.783,<br>0.0298,<br>1.070e-02, 0.0111     | 0.995,<br>0.0497,<br>1.080e-02, 0.0111     | 1.000,<br>0.0995,<br>1.100e-02, 0.0113            |
| MR-Egger           | 0.058,<br>-0.0848,<br>6.559e-01, 0.6496      | 0.057,<br>-0.0391,<br>6.559e-01, 0.6496   | 0.059,<br>-0.0208,<br>6.560e-01, 0.6496    | 0.060,<br>-0.0025,<br>6.560e-01, 0.6496   | 0.063,<br>0.0066,<br>6.560e-01, 0.6496    | 0.062,<br>0.0158,<br>6.561e-01, 0.6496    | 0.062,<br>0.0340,<br>6.561e-01, 0.6496     | 0.063,<br>0.0523,<br>6.561e-01, 0.6496     | 0.066,<br>0.0979,<br>6.562e-01, 0.6496            |
| MR-Weighted-Median | 1.000,<br>-0.0955,<br>1.440e-02, 0.0147      | 0.898,<br>-0.0476,<br>1.460e-02, 0.0148   | 0.471,<br>-0.0285,<br>1.470e-02, 0.0149    | 0.088,<br>-0.0093,<br>1.470e-02, 0.015    | 0.038,<br>0.0003,<br>1.480e-02, 0.015     | 0.097,<br>0.0098,<br>1.490e-02, 0.0151    | 0.466,<br>0.0288,<br>1.510e-02, 0.0152     | 0.872,<br>0.0479,<br>1.520e-02, 0.0153     | 1.000,<br>0.0955,<br>1.590e-02, 0.0156            |
| MR-Weighted-Mode   | 1.000,<br>-0.0974,<br>1.320e-02, 0.0127      | 0.950,<br>-0.0487,<br>1.360e-02, 0.0128   | 0.641,<br>-0.0294,<br>1.370e-02, 0.0129    | 0.125,<br>-0.0098,<br>1.370e-02, 0.013    | 0.062,<br>-0.0001,<br>1.380e-02, 0.013    | 0.131,<br>0.0096,<br>1.380e-02, 0.013     | 0.570,<br>0.0290,<br>1.380e-02, 0.0131     | 0.944,<br>0.0484,<br>1.410e-02, 0.0132     | 1.000,<br>0.0965,<br>1.440e-02, 0.0135            |
| MR-RAPS1           | 0.130,<br>-0.1009,<br>1.324e-01, 0.1274      | 0.086,<br>-0.0509,<br>1.324e-01, 0.1274   | 0.069,<br>-0.0309,<br>1.324e-01, 0.1274    | 0.063,<br>-0.0109,<br>1.324e-01, 0.1274   | 0.060,<br>-0.0009,<br>1.324e-01, 0.1274   | 0.059,<br>0.0091,<br>1.324e-01, 0.1274    | 0.064,<br>0.0291,<br>1.324e-01, 0.1274     | 0.081,<br>0.0491,<br>1.324e-01, 0.1274     | 0.135,<br>0.0991,<br>1.324e-01, 0.1274            |
| MR-RAPS2           | 0.122,<br>-0.1012,<br>1.477e-01, 0.1394      | 0.088,<br>-0.0512,<br>1.476e-01, 0.1394   | 0.072,<br>-0.0312,<br>1.476e-01, 0.1394    | 0.070,<br>-0.0112,<br>1.476e-01, 0.1394   | 0.062,<br>-0.0012,<br>1.476e-01, 0.1394   | 0.062,<br>0.0088,<br>1.476e-01, 0.1394    | 0.067,<br>0.0288,<br>1.476e-01, 0.1394     | 0.085,<br>0.0488,<br>1.476e-01, 0.1394     | 0.125,<br>0.0988,<br>1.476e-01, 0.1394            |
| MR-RAPS3           | 0.941,<br>503.2040,<br>1.594e+04,<br>3919000 | 0.920,<br>6.3746,<br>1.885e+02,<br>570.8  | 0.894,<br>-11.3066,<br>2.174e+02,<br>725.9 | 0.923,<br>-2.3240,<br>5.227e+01,<br>46.58 | 0.920,<br>2.8694,<br>8.390e+01,<br>134.1  | 0.911,<br>-22.8691,<br>5.550e+02,<br>5556 | 0.921,<br>2.4172,<br>9.464e+01,<br>154.3   | 0.919,<br>1.5489,<br>6.579e+01,<br>74.78   | 0.932,<br>7.4360,<br>1.186e+02,<br>254.6          |
| MR-RAPS4           | 1.000,<br>0.8504,<br>1.058e+00,<br>0.0197    | 1.000,<br>0.6833,<br>1.392e+00,<br>0.0228 | 1.000,<br>0.5158,<br>1.604e+00,<br>0.0256  | 0.997,<br>0.2713,<br>1.657e+00,<br>0.0255 | 0.997,<br>0.1822,<br>1.785e+00,<br>0.0285 | 0.999,<br>0.0994,<br>1.724e+00,<br>0.0274 | 1.000,<br>-0.1098,<br>1.712e+00,<br>0.0282 | 1.000,<br>-0.2692,<br>1.694e+00,<br>0.0317 | 1.000,<br>-0.5520,<br>1.520e+00,<br>0.027         |

Table S79: Main simulations: in each cell, from top to bottom are empirical type-I error/power, mean( $\hat{\theta}$ ), SD( $\hat{\theta}$ ), mean(SE( $\hat{\theta}$ )) when  $m = 100$ , the InSIDE satisfied,  $q = 0.6$ , and  $n = 200000$ .

| Methods \ $\theta$ | -0.1                            | -0.05                          | -0.03                          | -0.01                           | 0                               | 0.01                            | 0.03                           | 0.05                                | 0.1                            |
|--------------------|---------------------------------|--------------------------------|--------------------------------|---------------------------------|---------------------------------|---------------------------------|--------------------------------|-------------------------------------|--------------------------------|
| cML-MA-AIC         | 1.000, -0.0968, 0.0105, 0.0088  | 0.986, -0.0470, 0.0107, 0.0089 | 0.813, -0.0270, 0.0105, 0.009  | 0.175, -0.0080, 0.0097, 0.0089  | 0.061, 0.0007, 0.0094, 0.0088   | 0.201, 0.0093, 0.0099, 0.0089   | 0.848, 0.0284, 0.0108, 0.0091  | 0.995, 0.0482, 0.0110, 0.0092       | 1.000, 0.0980, 0.0113, 0.0094  |
| cML-MA-AIC-Profile | 1.000, -0.0970, 0.0106, 0.0089  | 0.986, -0.0470, 0.0107, 0.009  | 0.812, -0.0270, 0.0105, 0.009  | 0.173, -0.0080, 0.0097, 0.0089  | 0.060, 0.0007, 0.0094, 0.0089   | 0.197, 0.0093, 0.0099, 0.0089   | 0.847, 0.0284, 0.0108, 0.0091  | 0.993, 0.0483, 0.0111, 0.0092       | 1.000, 0.0982, 0.0113, 0.0094  |
| cML-AIC            | 1.000, -0.0981, 0.0112, 0.0079  | 0.994, -0.0483, 0.0115, 0.008  | 0.881, -0.0283, 0.0114, 0.008  | 0.266, -0.0087, 0.0109, 0.008   | 0.135, 0.0007, 0.0108, 0.0081   | 0.285, 0.0101, 0.0110, 0.0081   | 0.895, 0.0297, 0.0114, 0.0081  | 0.995, 0.0495, 0.0115, 0.0082       | 1.000, 0.0994, 0.0117, 0.0084  |
| cML-AIC-Profile    | 1.000, -0.0982, 0.0112, 0.0079  | 0.994, -0.0483, 0.0115, 0.008  | 0.880, -0.0283, 0.0114, 0.008  | 0.266, -0.0087, 0.0109, 0.0081  | 0.133, 0.0007, 0.0108, 0.0081   | 0.285, 0.0101, 0.0110, 0.0081   | 0.893, 0.0297, 0.0114, 0.0082  | 0.995, 0.0496, 0.0115, 0.0082       | 1.000, 0.0995, 0.0118, 0.0084  |
| cML-MA-BIC         | 1.000, -0.0997, 0.0072, 0.0073  | 1.000, -0.0496, 0.0073, 0.0073 | 0.983, -0.0296, 0.0073, 0.0074 | 0.260, -0.0096, 0.0074, 0.0074  | 0.044, 0.0003, 0.0074, 0.0074   | 0.300, 0.0103, 0.0074, 0.0075   | 0.987, 0.0303, 0.0075, 0.0075  | 1.000, 0.0503, 0.0075, 0.0076       | 1.000, 0.1003, 0.0077, 0.0077  |
| cML-MA-BIC-Profile | 1.000, -0.0997, 0.0072, 0.0073  | 1.000, -0.0496, 0.0073, 0.0074 | 0.983, -0.0296, 0.0074, 0.0074 | 0.260, -0.0096, 0.0074, 0.0075  | 0.044, 0.0003, 0.0074, 0.0075   | 0.296, 0.0103, 0.0074, 0.0075   | 0.986, 0.0303, 0.0075, 0.0075  | 1.000, 0.0503, 0.0075, 0.0076       | 1.000, 0.1003, 0.0077, 0.0078  |
| cML-BIC            | 1.000, -0.0997, 0.0072, 0.0073  | 1.000, -0.0497, 0.0073, 0.0073 | 0.985, -0.0297, 0.0073, 0.0073 | 0.270, -0.0097, 0.0074, 0.0074  | 0.045, 0.0003, 0.0074, 0.0074   | 0.297, 0.0103, 0.0074, 0.0074   | 0.985, 0.0303, 0.0075, 0.0075  | 1.000, 0.0503, 0.0075, 0.0075       | 1.000, 0.1003, 0.0077, 0.0077  |
| cML-BIC-Profile    | 1.000, -0.0997, 0.0072, 0.0073  | 1.000, -0.0497, 0.0073, 0.0073 | 0.985, -0.0297, 0.0073, 0.0073 | 0.270, -0.0097, 0.0074, 0.0074  | 0.044, 0.0003, 0.0074, 0.0074   | 0.294, 0.0103, 0.0074, 0.0074   | 0.985, 0.0303, 0.0075, 0.0075  | 1.000, 0.0503, 0.0075, 0.0075       | 1.000, 0.1003, 0.0077, 0.0077  |
| MR-Mix             | 1.000, -0.0946, 0.0081, 0.0099  | 0.999, -0.0466, 0.0079, 0.0099 | 0.883, -0.0276, 0.0078, 0.0099 | 0.170, -0.0089, 0.0081, 0.0098  | 0.035, 0.0002, 0.0081, 0.0098   | 0.183, 0.0094, 0.0081, 0.0098   | 0.886, 0.0277, 0.0078, 0.0098  | 0.999, 0.0456, 0.0079, 0.0098       | 1.000, 0.0895, 0.0080, 0.0098  |
| MR-ContMix         | 1.000, -0.0994, 0.0074, NA      | 1.000, -0.0495, 0.0074, NA     | 0.981, -0.0296, 0.0075, NA     | 0.260, -0.0096, 0.0075, NA      | 0.053, 0.0004, 0.0075, NA       | 0.294, 0.0103, 0.0075, NA       | 0.985, 0.0303, 0.0076, NA      | 1.000, 0.0503, 0.0077, NA           | 1.000, 0.1002, 0.0079, NA      |
| MR-Lasso           | 1.000, -0.0995, 0.0077, 0.0074  | 1.000, -0.0496, 0.0077, 0.0075 | 0.973, -0.0295, 0.0078, 0.0075 | 0.258, -0.0095, 0.0078, 0.0076  | 0.055, 0.0005, 0.0078, 0.0076   | 0.290, 0.0105, 0.0078, 0.0076   | 0.973, 0.0304, 0.0079, 0.0077  | 1.000, 0.0503, 0.0080, 0.0077       | 1.000, 0.1003, 0.0082, 0.0079  |
| MR-PRESSO          | 0.964, -0.0976, 0.0587, 0.0107  | 0.902, -0.0485, 0.0568, 0.0105 | 0.822, -0.0286, 0.0568, 0.0106 | 0.490, -0.0088, 0.0568, 0.0106  | 0.391, 0.0008, 0.0578, 0.0107   | 0.518, 0.0108, 0.0578, 0.0107   | 0.839, 0.0310, 0.0567, 0.0106  | 0.894, 0.0508, 0.0557, 0.0105       | 0.971, 0.1007, 0.0554, 0.0106  |
| MR-IVW             | 0.129, -0.0973, 0.1332, 0.1278  | 0.084, -0.0470, 0.1332, 0.1278 | 0.074, -0.0269, 0.1332, 0.1278 | 0.065, -0.0068, 0.1332, 0.1278  | 0.065, 0.0033, 0.1332, 0.1278   | 0.060, 0.0133, 0.1332, 0.1278   | 0.065, 0.0335, 0.1332, 0.1278  | 0.071, 0.0536, 0.1332, 0.1278       | 0.138, 0.1038, 0.1332, 0.1278  |
| MR-IVW-Oracle      | 1.000, -0.0995, 0.0072, 0.0075  | 1.000, -0.0496, 0.0072, 0.0076 | 0.982, -0.0296, 0.0073, 0.0076 | 0.242, -0.0097, 0.0073, 0.0077  | 0.039, 0.0003, 0.0073, 0.0077   | 0.275, 0.0103, 0.0074, 0.0077   | 0.980, 0.0303, 0.0074, 0.0078  | 1.000, 0.0502, 0.0075, 0.0078       | 1.000, 0.1002, 0.0076, 0.008   |
| MR-Egger           | 0.060, -0.1015, 0.6714, 0.6652  | 0.053, -0.0536, 0.6713, 0.6652 | 0.053, -0.0344, 0.6713, 0.6652 | 0.051, -0.0152, 0.6712, 0.6652  | 0.052, -0.0057, 0.6712, 0.6652  | 0.052, 0.0039, 0.6712, 0.6652   | 0.052, 0.0231, 0.6712, 0.6652  | 0.056, 0.0422, 0.6712, 0.6652       | 0.054, 0.0901, 0.6711, 0.6652  |
| MR-Weighted-Median | 1.000, -0.0966, 0.0103, 0.0104  | 0.992, -0.0480, 0.0104, 0.0105 | 0.774, -0.0285, 0.0105, 0.0106 | 0.144, -0.0091, 0.0106, 0.0106  | 0.050, 0.0006, 0.0106, 0.0106   | 0.155, 0.0103, 0.0107, 0.0107   | 0.796, 0.0296, 0.0108, 0.0107  | 0.991, 0.0490, 0.0109, 0.0108       | 1.000, 0.0974, 0.0112, 0.0111  |
| MR-Weighted-Mode   | 1.000, -0.0979, 0.0104, 0.0097  | 0.997, -0.0489, 0.0102, 0.0097 | 0.838, -0.0290, 0.0104, 0.0098 | 0.175, -0.0093, 0.0104, 0.0098  | 0.063, 0.0004, 0.0107, 0.0099   | 0.204, 0.0104, 0.0107, 0.0099   | 0.839, 0.0298, 0.0108, 0.0099  | 0.996, 0.0491, 0.0107, 0.01         | 1.000, 0.0984, 0.0108, 0.0101  |
| MR-RAPS1           | 0.130, -0.0970, 0.1289, 0.1272  | 0.072, -0.0470, 0.1289, 0.1272 | 0.062, -0.0270, 0.1289, 0.1272 | 0.054, -0.0070, 0.1289, 0.1272  | 0.051, 0.0030, 0.1289, 0.1272   | 0.051, 0.0130, 0.1289, 0.1272   | 0.062, 0.0330, 0.1289, 0.1272  | 0.072, 0.0530, 0.1289, 0.1272       | 0.132, 0.1030, 0.1289, 0.1273  |
| MR-RAPS2           | 0.135, -0.0858, 0.1858, 0.1382  | 0.081, -0.0419, 0.1756, 0.1387 | 0.073, -0.0247, 0.1617, 0.1389 | 0.060, -0.0068, 0.1438, 0.1392  | 0.057, 0.0033, 0.1438, 0.1391   | 0.059, 0.0126, 0.1457, 0.1389   | 0.069, 0.0332, 0.1439, 0.1393  | 0.078, 0.0525, 0.1518, 0.1388       | 0.122, 0.1032, 0.1439, 0.1393  |
| MR-RAPS3           | 0.954, 12.3642, 306.2539, 912.4 | 0.946, 6.7734, 240.0308, 678.1 | 0.929, -0.4972, 82.9198, 80.98 | 0.934, -10.9033, 354.2821, 1499 | 0.942, -2.8934, 155.7400, 268.9 | 0.944, -5.2507, 189.0625, 494.7 | 0.933, 0.3578, 133.3709, 224.1 | 0.931, 316.9602, 9703.3823, 1083000 | 0.963, 2.2182, 52.7535, 43.62  |
| MR-RAPS4           | 1.000, 0.8989, 1.1818, 0.0167   | 1.000, 0.6943, 1.4533, 0.0177  | 1.000, 0.4703, 1.6982, 0.0205  | 1.000, 0.3016, 1.8434, 0.0239   | 0.999, 0.0379, 1.9194, 0.026    | 0.999, -0.0888, 1.9151, 0.0256  | 1.000, -0.3865, 1.9576, 0.0297 | 1.000, -0.6355, 1.9502, 0.0329      | 1.000, -1.0642, 1.6312, 0.0331 |

Table S80: Main simulations: in each cell, from top to bottom are empirical type-I error/power, mean( $\hat{\theta}$ ), SD( $\hat{\theta}$ ), mean( $SE(\hat{\theta})$ ) when  $m = 100$ , the InSIDE violated,  $q = 0.2$ , and  $n = 50000$ .

| Methods \ $\theta$ | -0.1                                    | -0.05                                   | -0.03                                   | -0.01                                   | 0                                       | 0.01                                   | 0.03                                   | 0.05                                   | 0.1                                    |
|--------------------|-----------------------------------------|-----------------------------------------|-----------------------------------------|-----------------------------------------|-----------------------------------------|----------------------------------------|----------------------------------------|----------------------------------------|----------------------------------------|
| cML-MA-AIC         | 1.000,<br>-0.0969,<br>0.0132,<br>0.0105 | 0.972,<br>-0.0472,<br>0.0133,<br>0.0107 | 0.673,<br>-0.0274,<br>0.0133,<br>0.0107 | 0.168,<br>-0.0083,<br>0.0125,<br>0.0107 | 0.091,<br>0.0006,<br>0.0123,<br>0.0107  | 0.189,<br>0.0096,<br>0.0126,<br>0.0108 | 0.691,<br>0.0287,<br>0.0136,<br>0.011  | 0.969,<br>0.0485,<br>0.0139,<br>0.0111 | 1.000,<br>0.0982,<br>0.0141,<br>0.0114 |
| cML-MA-AIC-Profile | 1.000,<br>-0.0974,<br>0.0133,<br>0.0106 | 0.971,<br>-0.0474,<br>0.0134,<br>0.0107 | 0.672,<br>-0.0274,<br>0.0133,<br>0.0108 | 0.165,<br>-0.0083,<br>0.0125,<br>0.0107 | 0.090,<br>0.0006,<br>0.0123,<br>0.0108  | 0.183,<br>0.0096,<br>0.0126,<br>0.0108 | 0.689,<br>0.0287,<br>0.0137,<br>0.011  | 0.969,<br>0.0487,<br>0.0139,<br>0.0112 | 1.000,<br>0.0987,<br>0.0143,<br>0.0115 |
| cML-AIC            | 1.000,<br>-0.0982,<br>0.0137,<br>0.0096 | 0.984,<br>-0.0485,<br>0.0139,<br>0.0097 | 0.744,<br>-0.0285,<br>0.0139,<br>0.0098 | 0.247,<br>-0.0087,<br>0.0138,<br>0.0099 | 0.156,<br>0.0008,<br>0.0138,<br>0.0099  | 0.268,<br>0.0102,<br>0.0140,<br>0.01   | 0.763,<br>0.0299,<br>0.0143,<br>0.01   | 0.980,<br>0.0499,<br>0.0145,<br>0.0101 | 1.000,<br>0.0998,<br>0.0147,<br>0.0104 |
| cML-AIC-Profile    | 1.000,<br>-0.0985,<br>0.0139,<br>0.0097 | 0.984,<br>-0.0486,<br>0.0140,<br>0.0098 | 0.743,<br>-0.0285,<br>0.0140,<br>0.0099 | 0.243,<br>-0.0087,<br>0.0138,<br>0.0099 | 0.152,<br>0.0008,<br>0.0138,<br>0.01    | 0.264,<br>0.0102,<br>0.0140,<br>0.01   | 0.759,<br>0.0299,<br>0.0144,<br>0.0101 | 0.980,<br>0.0499,<br>0.0145,<br>0.0102 | 1.000,<br>0.1001,<br>0.0149,<br>0.0105 |
| cML-MA-BIC         | 1.000,<br>-0.0998,<br>0.0090,<br>0.0089 | 1.000,<br>-0.0498,<br>0.0091,<br>0.009  | 0.901,<br>-0.0298,<br>0.0092,<br>0.0091 | 0.191,<br>-0.0098,<br>0.0093,<br>0.0091 | 0.055,<br>0.0002,<br>0.0093,<br>0.0092  | 0.200,<br>0.0102,<br>0.0093,<br>0.0092 | 0.893,<br>0.0302,<br>0.0094,<br>0.0093 | 1.000,<br>0.0502,<br>0.0095,<br>0.0094 | 1.000,<br>0.1003,<br>0.0098,<br>0.0097 |
| cML-MA-BIC-Profile | 1.000,<br>-0.0998,<br>0.0091,<br>0.0089 | 1.000,<br>-0.0498,<br>0.0091,<br>0.0091 | 0.901,<br>-0.0298,<br>0.0091,<br>0.0092 | 0.191,<br>-0.0098,<br>0.0093,<br>0.0092 | 0.055,<br>0.0002,<br>0.0093,<br>0.0092  | 0.199,<br>0.0102,<br>0.0093,<br>0.0093 | 0.890,<br>0.0302,<br>0.0094,<br>0.0093 | 1.000,<br>0.0502,<br>0.0095,<br>0.0094 | 1.000,<br>0.1003,<br>0.0098,<br>0.0097 |
| cML-BIC            | 1.000,<br>-0.0999,<br>0.0091,<br>0.0088 | 1.000,<br>-0.0499,<br>0.0092,<br>0.0089 | 0.906,<br>-0.0298,<br>0.0092,<br>0.009  | 0.196,<br>-0.0098,<br>0.0093,<br>0.0091 | 0.061,<br>0.0002,<br>0.0093,<br>0.0091  | 0.203,<br>0.0102,<br>0.0094,<br>0.0092 | 0.897,<br>0.0302,<br>0.0094,<br>0.0092 | 1.000,<br>0.0503,<br>0.0095,<br>0.0093 | 1.000,<br>0.1003,<br>0.0098,<br>0.0096 |
| cML-BIC-Profile    | 1.000,<br>-0.0999,<br>0.0091,<br>0.0089 | 1.000,<br>-0.0499,<br>0.0092,<br>0.009  | 0.903,<br>-0.0298,<br>0.0092,<br>0.009  | 0.193,<br>-0.0098,<br>0.0093,<br>0.0091 | 0.059,<br>0.0002,<br>0.0093,<br>0.0091  | 0.203,<br>0.0102,<br>0.0094,<br>0.0092 | 0.897,<br>0.0302,<br>0.0094,<br>0.0093 | 1.000,<br>0.0503,<br>0.0095,<br>0.0094 | 1.000,<br>0.1003,<br>0.0098,<br>0.0096 |
| MR-Mix             | 0.999,<br>-0.1108,<br>0.0132,<br>0.0196 | 0.884,<br>-0.0548,<br>0.0130,<br>0.0194 | 0.392,<br>-0.0327,<br>0.0131,<br>0.0194 | 0.030,<br>-0.0111,<br>0.0131,<br>0.0193 | 0.004,<br>-0.0004,<br>0.0130,<br>0.0193 | 0.023,<br>0.0103,<br>0.0131,<br>0.0193 | 0.330,<br>0.0311,<br>0.0131,<br>0.0192 | 0.853,<br>0.0517,<br>0.0132,<br>0.0192 | 1.000,<br>0.1012,<br>0.0133,<br>0.0191 |
| MR-ContMix         | 1.000,<br>-0.0990,<br>0.0094,<br>NA     | 1.000,<br>-0.0494,<br>0.0095,<br>NA     | 0.882,<br>-0.0296,<br>0.0096,<br>NA     | 0.197,<br>-0.0097,<br>0.0096,<br>NA     | 0.055,<br>0.0003,<br>0.0097,<br>NA      | 0.188,<br>0.0102,<br>0.0097,<br>NA     | 0.864,<br>0.0301,<br>0.0098,<br>NA     | 0.999,<br>0.0499,<br>0.0099,<br>NA     | 1.000,<br>0.0996,<br>0.0103,<br>NA     |
| MR-Lasso           | 1.000,<br>-0.0990,<br>0.0094,<br>0.0089 | 1.000,<br>-0.0493,<br>0.0095,<br>0.009  | 0.883,<br>-0.0295,<br>0.0096,<br>0.0091 | 0.195,<br>-0.0096,<br>0.0097,<br>0.0092 | 0.068,<br>0.0004,<br>0.0097,<br>0.0092  | 0.221,<br>0.0103,<br>0.0098,<br>0.0092 | 0.888,<br>0.0302,<br>0.0098,<br>0.0093 | 1.000,<br>0.0500,<br>0.0099,<br>0.0094 | 1.000,<br>0.0998,<br>0.0103,<br>0.0096 |
| MR-PRESSO          | 1.000,<br>-0.0966,<br>0.0121,<br>0.0086 | 0.982,<br>-0.0471,<br>0.0120,<br>0.0087 | 0.834,<br>-0.0273,<br>0.0120,<br>0.0087 | 0.214,<br>-0.0075,<br>0.0120,<br>0.0088 | 0.138,<br>0.0024,<br>0.0119,<br>0.0088  | 0.310,<br>0.0124,<br>0.0119,<br>0.0089 | 0.895,<br>0.0322,<br>0.0119,<br>0.009  | 0.999,<br>0.0520,<br>0.0118,<br>0.009  | 1.000,<br>0.1014,<br>0.0118,<br>0.0093 |
| MR-IVW             | 0.168,<br>-0.0692,<br>0.0809,<br>0.0749 | 0.084,<br>-0.0193,<br>0.0809,<br>0.0749 | 0.078,<br>0.0006,<br>0.0809,<br>0.0749  | 0.091,<br>0.0205,<br>0.0809,<br>0.0749  | 0.100,<br>0.0305,<br>0.0809,<br>0.0749  | 0.101,<br>0.0405,<br>0.0809,<br>0.0749 | 0.143,<br>0.0604,<br>0.0809,<br>0.0749 | 0.208,<br>0.0804,<br>0.0809,<br>0.0749 | 0.420,<br>0.1302,<br>0.0809,<br>0.0749 |
| MR-IVW-Oracle      | 1.000,<br>-0.0992,<br>0.0089,<br>0.009  | 1.000,<br>-0.0495,<br>0.0090,<br>0.0092 | 0.901,<br>-0.0296,<br>0.0091,<br>0.0092 | 0.184,<br>-0.0098,<br>0.0091,<br>0.0093 | 0.053,<br>0.0002,<br>0.0092,<br>0.0093  | 0.192,<br>0.0101,<br>0.0092,<br>0.0094 | 0.886,<br>0.0300,<br>0.0093,<br>0.0095 | 1.000,<br>0.0499,<br>0.0094,<br>0.0095 | 1.000,<br>0.0995,<br>0.0097,<br>0.0098 |
| MR-Egger           | 0.349,<br>0.3253,<br>0.4658,<br>0.2819  | 0.366,<br>0.3702,<br>0.4660,<br>0.282   | 0.380,<br>0.3882,<br>0.4660,<br>0.282   | 0.382,<br>0.4061,<br>0.4661,<br>0.2821  | 0.385,<br>0.4151,<br>0.4661,<br>0.2821  | 0.392,<br>0.4241,<br>0.4661,<br>0.2821 | 0.409,<br>0.4420,<br>0.4662,<br>0.2822 | 0.422,<br>0.4599,<br>0.4663,<br>0.2822 | 0.456,<br>0.5047,<br>0.4664,<br>0.2823 |
| MR-Weighted-Median | 1.000,<br>-0.0980,<br>0.0118,<br>0.0129 | 0.980,<br>-0.0496,<br>0.0119,<br>0.013  | 0.636,<br>-0.0303,<br>0.0120,<br>0.0131 | 0.120,<br>-0.0111,<br>0.0121,<br>0.0132 | 0.031,<br>-0.0014,<br>0.0122,<br>0.0133 | 0.076,<br>0.0082,<br>0.0123,<br>0.0133 | 0.539,<br>0.0275,<br>0.0124,<br>0.0134 | 0.937,<br>0.0468,<br>0.0126,<br>0.0136 | 1.000,<br>0.0950,<br>0.0130,<br>0.0139 |
| MR-Weighted-Mode   | 0.939,<br>-0.0972,<br>0.0308,<br>0.048  | 0.506,<br>-0.0486,<br>0.0301,<br>0.0483 | 0.183,<br>-0.0296,<br>0.0296,<br>0.0484 | 0.021,<br>-0.0097,<br>0.0296,<br>0.0487 | 0.006,<br>-0.0004,<br>0.0287,<br>0.0488 | 0.019,<br>0.0096,<br>0.0288,<br>0.0489 | 0.174,<br>0.0290,<br>0.0295,<br>0.0491 | 0.512,<br>0.0492,<br>0.0289,<br>0.0493 | 0.923,<br>0.0966,<br>0.0298,<br>0.0501 |
| MR-RAPS1           | 0.171,<br>-0.0698,<br>0.0789,<br>0.0747 | 0.086,<br>-0.0198,<br>0.0789,<br>0.0747 | 0.069,<br>0.0003,<br>0.0789,<br>0.0747  | 0.074,<br>0.0203,<br>0.0789,<br>0.0747  | 0.085,<br>0.0303,<br>0.0789,<br>0.0747  | 0.097,<br>0.0403,<br>0.0789,<br>0.0747 | 0.142,<br>0.0603,<br>0.0789,<br>0.0747 | 0.205,<br>0.0803,<br>0.0789,<br>0.0748 | 0.419,<br>0.1304,<br>0.0790,<br>0.0748 |
| MR-RAPS2           | 1.000,<br>0.0184,<br>0.7491,<br>0.0125  | 1.000,<br>0.0428,<br>0.7641,<br>0.0125  | 0.962,<br>0.0682,<br>0.7370,<br>0.0122  | 0.653,<br>0.1387,<br>1.1355,<br>0.0133  | 0.559,<br>0.1015,<br>1.3704,<br>0.0126  | 0.640,<br>0.1526,<br>0.7543,<br>0.0125 | 0.967,<br>0.1430,<br>0.8293,<br>0.0134 | 1.000,<br>0.2281,<br>0.7863,<br>0.0131 | 1.000,<br>0.2073,<br>1.9485,<br>0.0145 |
| MR-RAPS3           | 0.887,<br>-0.1942,<br>0.2245,<br>0.0248 | 0.853,<br>-0.0490,<br>0.2245,<br>0.0238 | 0.846,<br>0.0058,<br>0.2200,<br>0.0232  | 0.847,<br>0.0577,<br>0.2139,<br>0.0227  | 0.857,<br>0.0825,<br>0.2104,<br>0.0224  | 0.869,<br>0.1066,<br>0.2067,<br>0.0221 | 0.875,<br>0.1522,<br>0.1989,<br>0.0215 | 0.911,<br>0.1947,<br>0.1908,<br>0.0209 | 0.959,<br>0.2884,<br>0.1712,<br>0.0196 |
| MR-RAPS4           | 1.000,<br>0.0747,<br>0.9888,<br>0.0155  | 1.000,<br>0.0707,<br>0.9599,<br>0.0147  | 0.975,<br>0.1220,<br>0.8988,<br>0.0141  | 0.753,<br>0.1447,<br>0.9533,<br>0.015   | 0.675,<br>0.1786,<br>0.8948,<br>0.0141  | 0.737,<br>0.1954,<br>0.9082,<br>0.0143 | 0.985,<br>0.2146,<br>0.9771,<br>0.0159 | 1.000,<br>0.2529,<br>0.9886,<br>0.0155 | 1.000,<br>0.3087,<br>1.0549,<br>0.0161 |

Table S81: Main simulations: in each cell, from top to bottom are empirical type-I error/power, mean( $\hat{\theta}$ ), SD( $\hat{\theta}$ ), mean(SE( $\hat{\theta}$ )) when  $m = 100$ , the InSIDE violated,  $q = 0.2$ , and  $n = 100000$ .

| Methods \ $\theta$ | -0.1                           | -0.05                          | -0.03                          | -0.01                          | 0                              | 0.01                          | 0.03                          | 0.05                          | 0.1                           |
|--------------------|--------------------------------|--------------------------------|--------------------------------|--------------------------------|--------------------------------|-------------------------------|-------------------------------|-------------------------------|-------------------------------|
| cML-MA-AIC         | 1.000, -0.0980, 0.0090, 0.0074 | 1.000, -0.0483, 0.0092, 0.0075 | 0.925, -0.0284, 0.0093, 0.0076 | 0.252, -0.0089, 0.0088, 0.0076 | 0.083, 0.0001, 0.0085, 0.0076  | 0.248, 0.0092, 0.0089, 0.0076 | 0.916, 0.0287, 0.0095, 0.0078 | 0.998, 0.0485, 0.0097, 0.0079 | 1.000, 0.0982, 0.0099, 0.0081 |
| cML-MA-AIC-Profile | 1.000, -0.0984, 0.0091, 0.0075 | 1.000, -0.0484, 0.0092, 0.0076 | 0.925, -0.0284, 0.0093, 0.0076 | 0.248, -0.0089, 0.0088, 0.0076 | 0.081, 0.0001, 0.0085, 0.0076  | 0.248, 0.0092, 0.0089, 0.0077 | 0.916, 0.0287, 0.0096, 0.0078 | 0.998, 0.0486, 0.0097, 0.0079 | 1.000, 0.0985, 0.0100, 0.0081 |
| cML-AIC            | 1.000, -0.0990, 0.0095, 0.0068 | 1.000, -0.0492, 0.0096, 0.0069 | 0.940, -0.0293, 0.0097, 0.0069 | 0.333, -0.0094, 0.0096, 0.007  | 0.144, 0.0002, 0.0095, 0.007   | 0.332, 0.0098, 0.0097, 0.007  | 0.932, 0.0295, 0.0100, 0.0071 | 0.999, 0.0495, 0.0101, 0.0072 | 1.000, 0.0992, 0.0103, 0.0074 |
| cML-AIC-Profile    | 1.000, -0.0992, 0.0095, 0.0068 | 1.000, -0.0492, 0.0096, 0.0069 | 0.940, -0.0293, 0.0097, 0.007  | 0.330, -0.0094, 0.0096, 0.007  | 0.142, 0.0002, 0.0095, 0.007   | 0.331, 0.0098, 0.0097, 0.0071 | 0.932, 0.0296, 0.0101, 0.0071 | 0.999, 0.0495, 0.0101, 0.0072 | 1.000, 0.0994, 0.0104, 0.0074 |
| cML-MA-BIC         | 1.000, -0.0998, 0.0063, 0.0063 | 1.000, -0.0498, 0.0064, 0.0064 | 0.995, -0.0298, 0.0064, 0.0064 | 0.335, -0.0098, 0.0065, 0.0065 | 0.048, 0.0002, 0.0065, 0.0065  | 0.335, 0.0102, 0.0065, 0.0065 | 0.992, 0.0302, 0.0066, 0.0066 | 1.000, 0.0501, 0.0067, 0.0066 | 1.000, 0.1001, 0.0069, 0.0068 |
| cML-MA-BIC-Profile | 1.000, -0.0998, 0.0063, 0.0063 | 1.000, -0.0498, 0.0064, 0.0064 | 0.995, -0.0298, 0.0064, 0.0065 | 0.333, -0.0098, 0.0065, 0.0065 | 0.048, 0.0002, 0.0065, 0.0065  | 0.334, 0.0102, 0.0065, 0.0065 | 0.992, 0.0302, 0.0066, 0.0066 | 1.000, 0.0501, 0.0067, 0.0067 | 1.000, 0.1001, 0.0069, 0.0068 |
| cML-BIC            | 1.000, -0.0998, 0.0063, 0.0062 | 1.000, -0.0498, 0.0064, 0.0063 | 0.995, -0.0298, 0.0064, 0.0064 | 0.347, -0.0098, 0.0065, 0.0064 | 0.053, 0.0002, 0.0065, 0.0064  | 0.340, 0.0102, 0.0065, 0.0065 | 0.993, 0.0302, 0.0066, 0.0065 | 1.000, 0.0502, 0.0067, 0.0066 | 1.000, 0.1002, 0.0069, 0.0068 |
| cML-BIC-Profile    | 1.000, -0.0998, 0.0063, 0.0062 | 1.000, -0.0498, 0.0064, 0.0063 | 0.995, -0.0298, 0.0064, 0.0064 | 0.344, -0.0098, 0.0065, 0.0064 | 0.052, 0.0002, 0.0065, 0.0065  | 0.338, 0.0102, 0.0065, 0.0065 | 0.993, 0.0302, 0.0066, 0.0065 | 1.000, 0.0502, 0.0067, 0.0066 | 1.000, 0.1002, 0.0069, 0.0068 |
| MR-Mix             | 0.999, -0.1102, 0.0102, 0.0155 | 0.981, -0.0539, 0.0099, 0.0153 | 0.578, -0.0320, 0.0098, 0.0153 | 0.037, -0.0102, 0.0099, 0.0152 | 0.006, 0.0004, 0.0100, 0.0152  | 0.048, 0.0111, 0.0100, 0.0152 | 0.614, 0.0320, 0.0100, 0.0152 | 0.967, 0.0527, 0.0100, 0.0151 | 1.000, 0.1021, 0.0102, 0.015  |
| MR-ContMix         | 1.000, -0.0995, 0.0065, NA     | 1.000, -0.0497, 0.0066, NA     | 0.992, -0.0297, 0.0066, NA     | 0.336, -0.0098, 0.0066, NA     | 0.054, 0.0002, 0.0067, NA      | 0.324, 0.0101, 0.0067, NA     | 0.993, 0.0300, 0.0067, NA     | 1.000, 0.0500, 0.0068, NA     | 1.000, 0.0998, 0.0070, NA     |
| MR-Lasso           | 1.000, -0.0994, 0.0065, 0.0063 | 1.000, -0.0496, 0.0066, 0.0064 | 0.992, -0.0296, 0.0066, 0.0064 | 0.337, -0.0097, 0.0067, 0.0065 | 0.057, 0.0003, 0.0068, 0.0065  | 0.341, 0.0102, 0.0068, 0.0065 | 0.991, 0.0301, 0.0069, 0.0066 | 1.000, 0.0500, 0.0069, 0.0067 | 1.000, 0.0998, 0.0071, 0.0068 |
| MR-PRESSO          | 0.997, -0.0952, 0.0142, 0.0062 | 0.964, -0.0456, 0.0139, 0.0062 | 0.891, -0.0258, 0.0137, 0.0063 | 0.385, -0.0060, 0.0136, 0.0063 | 0.249, 0.0039, 0.0135, 0.0063  | 0.507, 0.0138, 0.0134, 0.0064 | 0.964, 0.0336, 0.0133, 0.0064 | 0.998, 0.0534, 0.0132, 0.0065 | 1.000, 0.1030, 0.0129, 0.0066 |
| MR-IVW             | 0.171, -0.0677, 0.0826, 0.075  | 0.096, -0.0177, 0.0826, 0.0749 | 0.081, 0.0023, 0.0826, 0.0749  | 0.086, 0.0223, 0.0826, 0.0749  | 0.093, 0.0323, 0.0827, 0.0749  | 0.103, 0.0423, 0.0827, 0.0749 | 0.157, 0.0623, 0.0827, 0.0749 | 0.217, 0.0823, 0.0827, 0.0749 | 0.437, 0.1322, 0.0827, 0.0749 |
| MR-IVW-Oracle      | 1.000, -0.0994, 0.0062, 0.0064 | 1.000, -0.0496, 0.0063, 0.0065 | 0.995, -0.0297, 0.0064, 0.0065 | 0.317, -0.0098, 0.0064, 0.0066 | 0.046, 0.0002, 0.0065, 0.0066  | 0.317, 0.0101, 0.0065, 0.0066 | 0.993, 0.0300, 0.0066, 0.0067 | 1.000, 0.0500, 0.0066, 0.0068 | 1.000, 0.0998, 0.0068, 0.0069 |
| MR-Egger           | 0.340, 0.3448, 0.4780, 0.29    | 0.374, 0.3922, 0.4780, 0.29    | 0.387, 0.4112, 0.4780, 0.29    | 0.406, 0.4301, 0.4780, 0.2901  | 0.411, 0.4396, 0.4780, 0.2901  | 0.412, 0.4491, 0.4780, 0.2901 | 0.432, 0.4680, 0.4780, 0.2901 | 0.445, 0.4869, 0.4780, 0.2901 | 0.479, 0.5342, 0.4780, 0.2902 |
| MR-Weighted-Median | 1.000, -0.0991, 0.0080, 0.0091 | 1.000, -0.0501, 0.0081, 0.0092 | 0.930, -0.0305, 0.0082, 0.0093 | 0.198, -0.0110, 0.0083, 0.0094 | 0.034, -0.0012, 0.0084, 0.0094 | 0.119, 0.0086, 0.0085, 0.0094 | 0.866, 0.0282, 0.0086, 0.0095 | 1.000, 0.0478, 0.0087, 0.0096 | 1.000, 0.0965, 0.0091, 0.0099 |
| MR-Weighted-Mode   | 0.961, -0.0958, 0.0654, 0.0386 | 0.794, -0.0462, 0.0656, 0.0388 | 0.360, -0.0267, 0.0656, 0.039  | 0.026, -0.0074, 0.0657, 0.0391 | 0.010, 0.0020, 0.0655, 0.0392  | 0.042, 0.0119, 0.0655, 0.0393 | 0.370, 0.0316, 0.0656, 0.0394 | 0.783, 0.0516, 0.0655, 0.0396 | 0.958, 0.1010, 0.0657, 0.0401 |
| MR-RAPS1           | 0.169, -0.0680, 0.0797, 0.0745 | 0.084, -0.0180, 0.0797, 0.0745 | 0.072, 0.0020, 0.0798, 0.0745  | 0.079, 0.0220, 0.0798, 0.0745  | 0.088, 0.0320, 0.0798, 0.0745  | 0.107, 0.0420, 0.0798, 0.0745 | 0.153, 0.0620, 0.0798, 0.0745 | 0.217, 0.0820, 0.0798, 0.0745 | 0.435, 0.1320, 0.0798, 0.0745 |
| MR-RAPS2           | 1.000, 0.0870, 1.7760, 0.01    | 1.000, 0.0671, 1.1320, 0.0085  | 0.999, 0.0293, 0.7147, 0.0084  | 0.735, -0.0223, 2.7815, 0.009  | 0.590, 0.1094, 1.3610, 0.0086  | 0.746, 0.0895, 0.7111, 0.0084 | 0.999, 0.1275, 0.7095, 0.0087 | 1.000, 0.1287, 0.7081, 0.0086 | 1.000, 0.3490, 3.3538, 0.0108 |
| MR-RAPS3           | 0.929, -0.1908, 0.2315, 0.0177 | 0.905, -0.0452, 0.2294, 0.017  | 0.902, 0.0097, 0.2241, 0.0166  | 0.908, 0.0619, 0.2173, 0.0162  | 0.899, 0.0868, 0.2134, 0.016   | 0.894, 0.1110, 0.2094, 0.0157 | 0.910, 0.1568, 0.2011, 0.0153 | 0.947, 0.1994, 0.1928, 0.0149 | 0.969, 0.2930, 0.1732, 0.0139 |
| MR-RAPS4           | 1.000, 0.0490, 0.9184, 0.0102  | 1.000, 0.0622, 0.8915, 0.0099  | 0.999, 0.0779, 0.8715, 0.0097  | 0.858, 0.0940, 0.8595, 0.0096  | 0.786, 0.0861, 0.8717, 0.0097  | 0.870, 0.1029, 0.8807, 0.0097 | 0.999, 0.1307, 0.8970, 0.0098 | 1.000, 0.1300, 0.9079, 0.0099 | 1.000, 0.0845, 0.9769, 0.0106 |

Table S82: Main simulations: in each cell, from top to bottom are empirical type-I error/power, mean( $\hat{\theta}$ ), SD( $\hat{\theta}$ ), mean(SE( $\hat{\theta}$ )) when  $m = 100$ , the InSIDE violated,  $q = 0.2$ , and  $n = 200000$ .

| Methods \ $\theta$ | -0.1                           | -0.05                          | -0.03                          | -0.01                          | 0                              | 0.01                          | 0.03                          | 0.05                          | 0.1                           |
|--------------------|--------------------------------|--------------------------------|--------------------------------|--------------------------------|--------------------------------|-------------------------------|-------------------------------|-------------------------------|-------------------------------|
| cML-MA-AIC         | 1.000, -0.0988, 0.0063, 0.0053 | 1.000, -0.0489, 0.0065, 0.0053 | 0.996, -0.0289, 0.0066, 0.0054 | 0.398, -0.0091, 0.0064, 0.0054 | 0.084, 0.0000, 0.0060, 0.0053  | 0.417, 0.0092, 0.0065, 0.0054 | 0.991, 0.0290, 0.0068, 0.0055 | 1.000, 0.0490, 0.0069, 0.0056 | 1.000, 0.0987, 0.0070, 0.0057 |
| cML-MA-AIC-Profile | 1.000, -0.0990, 0.0064, 0.0053 | 1.000, -0.0490, 0.0065, 0.0053 | 0.996, -0.0289, 0.0066, 0.0054 | 0.398, -0.0091, 0.0064, 0.0054 | 0.084, 0.0000, 0.0060, 0.0053  | 0.417, 0.0092, 0.0065, 0.0054 | 0.991, 0.0290, 0.0068, 0.0055 | 1.000, 0.0490, 0.0069, 0.0056 | 1.000, 0.0990, 0.0071, 0.0057 |
| cML-AIC            | 1.000, -0.0995, 0.0066, 0.0048 | 1.000, -0.0495, 0.0067, 0.0049 | 0.997, -0.0295, 0.0069, 0.0049 | 0.480, -0.0095, 0.0067, 0.0049 | 0.147, 0.0001, 0.0067, 0.005   | 0.506, 0.0097, 0.0069, 0.005  | 0.992, 0.0296, 0.0071, 0.005  | 1.000, 0.0496, 0.0071, 0.0051 | 1.000, 0.0995, 0.0074, 0.0052 |
| cML-AIC-Profile    | 1.000, -0.0996, 0.0066, 0.0048 | 1.000, -0.0495, 0.0068, 0.0049 | 0.997, -0.0295, 0.0069, 0.0049 | 0.479, -0.0096, 0.0068, 0.0049 | 0.146, 0.0001, 0.0066, 0.005   | 0.506, 0.0097, 0.0069, 0.005  | 0.992, 0.0296, 0.0071, 0.005  | 1.000, 0.0496, 0.0071, 0.0051 | 1.000, 0.0996, 0.0074, 0.0052 |
| cML-MA-BIC         | 1.000, -0.0999, 0.0043, 0.0044 | 1.000, -0.0499, 0.0044, 0.0045 | 1.000, -0.0299, 0.0044, 0.0045 | 0.579, -0.0099, 0.0045, 0.0046 | 0.049, 0.0001, 0.0045, 0.0046  | 0.595, 0.0101, 0.0045, 0.0046 | 1.000, 0.0301, 0.0046, 0.0046 | 1.000, 0.0501, 0.0046, 0.0047 | 1.000, 0.1001, 0.0048, 0.0048 |
| cML-MA-BIC-Profile | 1.000, -0.0999, 0.0043, 0.0044 | 1.000, -0.0499, 0.0044, 0.0045 | 1.000, -0.0299, 0.0045, 0.0046 | 0.578, -0.0099, 0.0045, 0.0046 | 0.049, 0.0001, 0.0045, 0.0046  | 0.590, 0.0101, 0.0045, 0.0046 | 1.000, 0.0301, 0.0046, 0.0046 | 1.000, 0.0501, 0.0046, 0.0047 | 1.000, 0.1001, 0.0048, 0.0048 |
| cML-BIC            | 1.000, -0.0999, 0.0043, 0.0044 | 1.000, -0.0499, 0.0044, 0.0045 | 1.000, -0.0299, 0.0045, 0.0045 | 0.582, -0.0099, 0.0045, 0.0045 | 0.055, 0.0001, 0.0045, 0.0045  | 0.597, 0.0101, 0.0046, 0.0046 | 1.000, 0.0301, 0.0046, 0.0046 | 1.000, 0.0501, 0.0047, 0.0047 | 1.000, 0.1001, 0.0048, 0.0048 |
| cML-BIC-Profile    | 1.000, -0.0999, 0.0043, 0.0044 | 1.000, -0.0499, 0.0044, 0.0045 | 1.000, -0.0299, 0.0045, 0.0045 | 0.582, -0.0099, 0.0045, 0.0045 | 0.055, 0.0001, 0.0045, 0.0046  | 0.597, 0.0101, 0.0046, 0.0046 | 1.000, 0.0301, 0.0046, 0.0046 | 1.000, 0.0501, 0.0047, 0.0047 | 1.000, 0.1001, 0.0048, 0.0048 |
| MR-Mix             | 0.999, -0.1104, 0.0080, 0.012  | 0.994, -0.0543, 0.0080, 0.0119 | 0.847, -0.0322, 0.0079, 0.0118 | 0.064, -0.0105, 0.0080, 0.0118 | 0.011, 0.0002, 0.0080, 0.0119  | 0.087, 0.0107, 0.0080, 0.0119 | 0.819, 0.0315, 0.0080, 0.0119 | 0.991, 0.0520, 0.0080, 0.0118 | 0.999, 0.1017, 0.0081, 0.0118 |
| MR-ContMix         | 1.000, -0.0997, 0.0044, NA     | 1.000, -0.0498, 0.0045, NA     | 1.000, -0.0299, 0.0045, NA     | 0.564, -0.0099, 0.0046, NA     | 0.057, 0.0001, 0.0046, NA      | 0.596, 0.0101, 0.0046, NA     | 1.000, 0.0300, 0.0047, NA     | 1.000, 0.0500, 0.0047, NA     | 1.000, 0.0999, 0.0049, NA     |
| MR-Lasso           | 1.000, -0.0997, 0.0045, 0.0044 | 1.000, -0.0497, 0.0046, 0.0045 | 1.000, -0.0298, 0.0046, 0.0046 | 0.565, -0.0099, 0.0046, 0.0046 | 0.055, 0.0001, 0.0046, 0.0046  | 0.593, 0.0101, 0.0047, 0.0046 | 1.000, 0.0301, 0.0047, 0.0047 | 1.000, 0.0500, 0.0048, 0.0047 | 1.000, 0.0999, 0.0049, 0.0048 |
| MR-PRESSO          | 0.994, -0.0950, 0.0178, 0.0047 | 0.956, -0.0455, 0.0158, 0.0047 | 0.889, -0.0256, 0.0158, 0.0047 | 0.601, -0.0057, 0.0157, 0.0047 | 0.354, 0.0042, 0.0155, 0.0047  | 0.691, 0.0142, 0.0155, 0.0047 | 0.969, 0.0340, 0.0154, 0.0047 | 0.991, 0.0539, 0.0152, 0.0048 | 1.000, 0.1036, 0.0148, 0.0049 |
| MR-IVW             | 0.208, -0.0778, 0.0783, 0.0748 | 0.082, -0.0277, 0.0783, 0.0748 | 0.062, -0.0076, 0.0783, 0.0748 | 0.062, 0.0124, 0.0783, 0.0748  | 0.074, 0.0224, 0.0783, 0.0748  | 0.088, 0.0324, 0.0783, 0.0748 | 0.117, 0.0525, 0.0783, 0.0748 | 0.183, 0.0725, 0.0784, 0.0748 | 0.368, 0.1226, 0.0784, 0.0748 |
| MR-IVW-Oracle      | 1.000, -0.0997, 0.0043, 0.0045 | 1.000, -0.0498, 0.0044, 0.0046 | 1.000, -0.0298, 0.0044, 0.0046 | 0.563, -0.0099, 0.0047, 0.0047 | 0.045, 0.0001, 0.0045, 0.0047  | 0.584, 0.0101, 0.0045, 0.0047 | 1.000, 0.0301, 0.0046, 0.0047 | 1.000, 0.0500, 0.0046, 0.0048 | 1.000, 0.0999, 0.0048, 0.0049 |
| MR-Egger           | 0.344, 0.3366, 0.4740, 0.2926  | 0.383, 0.3854, 0.4739, 0.2926  | 0.398, 0.4049, 0.4739, 0.2927  | 0.406, 0.4244, 0.4739, 0.2927  | 0.406, 0.4341, 0.4739, 0.2927  | 0.417, 0.4438, 0.4739, 0.2927 | 0.424, 0.4633, 0.4738, 0.2927 | 0.437, 0.4828, 0.4738, 0.2927 | 0.476, 0.5314, 0.4738, 0.2927 |
| MR-Weighted-Median | 1.000, -0.0999, 0.0058, 0.0064 | 1.000, -0.0504, 0.0058, 0.0065 | 0.999, -0.0306, 0.0058, 0.0066 | 0.353, -0.0108, 0.0058, 0.0066 | 0.031, -0.0010, 0.0058, 0.0066 | 0.244, 0.0089, 0.0059, 0.0067 | 0.994, 0.0287, 0.0059, 0.0067 | 1.000, 0.0484, 0.0060, 0.0068 | 1.000, 0.0977, 0.0062, 0.007  |
| MR-Weighted-Mode   | 0.967, -0.1036, 0.1158, 0.0315 | 0.906, -0.0536, 0.1161, 0.0316 | 0.625, -0.0338, 0.1162, 0.0316 | 0.061, -0.0140, 0.1163, 0.0317 | 0.002, -0.0042, 0.1163, 0.0317 | 0.064, 0.0062, 0.1165, 0.0317 | 0.632, 0.0262, 0.1167, 0.0318 | 0.913, 0.0458, 0.1169, 0.0317 | 0.971, 0.0962, 0.1173, 0.032  |
| MR-RAPS1           | 0.195, -0.0781, 0.0762, 0.0742 | 0.085, -0.0280, 0.0762, 0.0742 | 0.058, -0.0080, 0.0762, 0.0742 | 0.063, 0.0120, 0.0762, 0.0742  | 0.066, 0.0220, 0.0762, 0.0742  | 0.079, 0.0320, 0.0763, 0.0742 | 0.119, 0.0520, 0.0763, 0.0742 | 0.173, 0.0720, 0.0763, 0.0742 | 0.378, 0.1220, 0.0763, 0.0742 |
| MR-RAPS2           | 1.000, -0.0155, 0.0781, 0.0054 | 1.000, -0.0329, 2.2290, 0.0061 | 1.000, -0.0271, 0.5893, 0.0054 | 0.853, 0.0669, 0.9552, 0.0056  | 0.609, 0.0317, 0.5726, 0.0053  | 0.857, 0.0631, 0.9608, 0.0061 | 1.000, 0.0686, 0.5920, 0.0055 | 1.000, 0.0717, 1.4411, 0.0062 | 1.000, 0.1832, 2.2115, 0.0063 |
| MR-RAPS3           | 0.957, -0.2170, 0.2156, 0.0123 | 0.925, -0.0715, 0.2171, 0.0118 | 0.933, -0.0162, 0.2136, 0.0116 | 0.922, 0.0366, 0.2084, 0.0113  | 0.921, 0.0619, 0.2052, 0.0112  | 0.934, 0.0864, 0.2018, 0.011  | 0.923, 0.1331, 0.1943, 0.0107 | 0.943, 0.1767, 0.1865, 0.0105 | 0.974, 0.2728, 0.1672, 0.0098 |
| MR-RAPS4           | 1.000, -0.0865, 0.8985, 0.0071 | 1.000, -0.0529, 0.8316, 0.0065 | 1.000, -0.0219, 0.7790, 0.0063 | 0.946, 0.0228, 0.7810, 0.0063  | 0.837, 0.0387, 0.7647, 0.0062  | 0.941, 0.0464, 0.7928, 0.0063 | 1.000, 0.0730, 0.8056, 0.0064 | 1.000, 0.1114, 0.8503, 0.0066 | 1.000, 0.0825, 0.9615, 0.0083 |



Table S83: Main simulations: in each cell, from top to bottom are empirical type-I error/power, mean( $\hat{\theta}$ ), SD( $\hat{\theta}$ ), mean(SE( $\hat{\theta}$ )) when  $m = 100$ , the InSIDE violated,  $q = 0.4$ , and  $n = 50000$ .

| Methods \ $\theta$ | -0.1                                        | -0.05                                   | -0.03                                        | -0.01                                    | 0                                        | 0.01                                      | 0.03                                     | 0.05                                   | 0.1                                    |
|--------------------|---------------------------------------------|-----------------------------------------|----------------------------------------------|------------------------------------------|------------------------------------------|-------------------------------------------|------------------------------------------|----------------------------------------|----------------------------------------|
| cML-MA-AIC         | 1.000,<br>-0.0970,<br>0.0166,<br>0.0133     | 0.879,<br>-0.0474,<br>0.0167,<br>0.0135 | 0.531,<br>-0.0278,<br>0.0164,<br>0.0135      | 0.142,<br>-0.0092,<br>0.0155,<br>0.0135  | 0.085,<br>-0.0003,<br>0.0152,<br>0.0135  | 0.132,<br>0.0085,<br>0.0155,<br>0.0136    | 0.493,<br>0.0271,<br>0.0167,<br>0.0138   | 0.848,<br>0.0466,<br>0.0172,<br>0.0141 | 0.998,<br>0.0961,<br>0.0179,<br>0.0144 |
| cML-MA-AIC-Profile | 1.000,<br>-0.0975,<br>0.0167,<br>0.0134     | 0.879,<br>-0.0475,<br>0.0168,<br>0.0136 | 0.527,<br>-0.0279,<br>0.0165,<br>0.0136      | 0.141,<br>-0.0092,<br>0.0155,<br>0.0136  | 0.083,<br>-0.0003,<br>0.0152,<br>0.0136  | 0.130,<br>0.0085,<br>0.0155,<br>0.0137    | 0.486,<br>0.0271,<br>0.0167,<br>0.0139   | 0.847,<br>0.0467,<br>0.0173,<br>0.0142 | 0.998,<br>0.0965,<br>0.0180,<br>0.0145 |
| cML-AIC            | 1.000,<br>-0.0988,<br>0.0172,<br>0.0121     | 0.923,<br>-0.0492,<br>0.0175,<br>0.0122 | 0.612,<br>-0.0293,<br>0.0175,<br>0.0123      | 0.222,<br>-0.0099,<br>0.0172,<br>0.0124  | 0.156,<br>-0.0004,<br>0.0172,<br>0.0124  | 0.212,<br>0.0090,<br>0.0173,<br>0.0125    | 0.591,<br>0.0284,<br>0.0178,<br>0.0126   | 0.908,<br>0.0483,<br>0.0181,<br>0.0127 | 0.999,<br>0.0980,<br>0.0186,<br>0.013  |
| cML-AIC-Profile    | 1.000,<br>-0.0991,<br>0.0174,<br>0.0122     | 0.921,<br>-0.0492,<br>0.0175,<br>0.0123 | 0.609,<br>-0.0294,<br>0.0176,<br>0.0124      | 0.221,<br>-0.0099,<br>0.0172,<br>0.0125  | 0.155,<br>-0.0004,<br>0.0172,<br>0.0125  | 0.208,<br>0.0090,<br>0.0173,<br>0.0126    | 0.590,<br>0.0284,<br>0.0178,<br>0.0127   | 0.907,<br>0.0484,<br>0.0182,<br>0.0128 | 0.999,<br>0.0981,<br>0.0187,<br>0.0131 |
| cML-MA-BIC         | 1.000,<br>-0.1005,<br>0.0113,<br>0.0112     | 0.992,<br>-0.0504,<br>0.0114,<br>0.0113 | 0.772,<br>-0.0304,<br>0.0114,<br>0.0114      | 0.150,<br>-0.0104,<br>0.0115,<br>0.0115  | 0.049,<br>-0.0004,<br>0.0115,<br>0.0115  | 0.125,<br>0.0096,<br>0.0115,<br>0.0115    | 0.732,<br>0.0296,<br>0.0116,<br>0.0116   | 0.989,<br>0.0496,<br>0.0117,<br>0.0117 | 1.000,<br>0.0996,<br>0.0120,<br>0.012  |
| cML-MA-BIC-Profile | 1.000,<br>-0.1005,<br>0.0113,<br>0.0112     | 0.991,<br>-0.0504,<br>0.0114,<br>0.0114 | 0.771,<br>-0.0304,<br>0.0114,<br>0.0114      | 0.148,<br>-0.0104,<br>0.0115,<br>0.0115  | 0.048,<br>-0.0004,<br>0.0115,<br>0.0115  | 0.122,<br>0.0096,<br>0.0115,<br>0.0116    | 0.731,<br>0.0296,<br>0.0116,<br>0.0117   | 0.989,<br>0.0496,<br>0.0117,<br>0.0118 | 1.000,<br>0.0996,<br>0.0120,<br>0.0121 |
| cML-BIC            | 1.000,<br>-0.1005,<br>0.0113,<br>0.0111     | 0.990,<br>-0.0505,<br>0.0114,<br>0.0112 | 0.777,<br>-0.0304,<br>0.0114,<br>0.0113      | 0.156,<br>-0.0104,<br>0.0115,<br>0.0114  | 0.053,<br>-0.0004,<br>0.0115,<br>0.0114  | 0.135,<br>0.0096,<br>0.0115,<br>0.0114    | 0.735,<br>0.0296,<br>0.0116,<br>0.0115   | 0.990,<br>0.0496,<br>0.0117,<br>0.0116 | 1.000,<br>0.0997,<br>0.0120,<br>0.0119 |
| cML-BIC-Profile    | 1.000,<br>-0.1005,<br>0.0113,<br>0.0111     | 0.990,<br>-0.0505,<br>0.0114,<br>0.0113 | 0.776,<br>-0.0304,<br>0.0114,<br>0.0113      | 0.156,<br>-0.0104,<br>0.0115,<br>0.0114  | 0.049,<br>-0.0004,<br>0.0115,<br>0.0114  | 0.132,<br>0.0096,<br>0.0115,<br>0.0115    | 0.731,<br>0.0296,<br>0.0116,<br>0.0116   | 0.989,<br>0.0496,<br>0.0117,<br>0.0117 | 1.000,<br>0.0997,<br>0.0120,<br>0.012  |
| MR-Mix             | 1.000,<br>-0.1025,<br>0.0132,<br>0.017      | 0.894,<br>-0.0509,<br>0.0131,<br>0.0169 | 0.393,<br>-0.0306,<br>0.0131,<br>0.0168      | 0.041,<br>-0.0106,<br>0.0131,<br>0.0168  | 0.019,<br>-0.0006,<br>0.0132,<br>0.0168  | 0.040,<br>0.0092,<br>0.0132,<br>0.0167    | 0.352,<br>0.0286,<br>0.0131,<br>0.0167   | 0.830,<br>0.0476,<br>0.0132,<br>0.0167 | 1.000,<br>0.0940,<br>0.0130,<br>0.0166 |
| MR-ContMix         | 1.000,<br>-0.0997,<br>0.0116,<br>NA         | 0.993,<br>-0.0501,<br>0.0117,<br>NA     | 0.755,<br>-0.0302,<br>0.0117,<br>NA          | 0.151,<br>-0.0104,<br>0.0118,<br>NA      | 0.054,<br>-0.0004,<br>0.0118,<br>NA      | 0.133,<br>0.0095,<br>0.0118,<br>NA        | 0.717,<br>0.0294,<br>0.0119,<br>NA       | 0.986,<br>0.0492,<br>0.0120,<br>NA     | 1.000,<br>0.0989,<br>0.0123,<br>NA     |
| MR-Lasso           | 1.000,<br>-0.0997,<br>0.0118,<br>0.0112     | 0.990,<br>-0.0500,<br>0.0119,<br>0.0114 | 0.752,<br>-0.0302,<br>0.0119,<br>0.0114      | 0.161,<br>-0.0104,<br>0.0119,<br>0.0115  | 0.060,<br>-0.0005,<br>0.0120,<br>0.0116  | 0.137,<br>0.0095,<br>0.0121,<br>0.0116    | 0.722,<br>0.0293,<br>0.0120,<br>0.0117   | 0.986,<br>0.0492,<br>0.0120,<br>0.0118 | 1.000,<br>0.0989,<br>0.0125,<br>0.012  |
| MR-PRESSO          | 0.997,<br>-0.0942,<br>0.0168,<br>0.0108     | 0.922,<br>-0.0448,<br>0.0165,<br>0.011  | 0.625,<br>-0.0251,<br>0.0163,<br>0.011       | 0.178,<br>-0.0054,<br>0.0161,<br>0.0111  | 0.143,<br>0.0045,<br>0.0160,<br>0.0111   | 0.283,<br>0.0144,<br>0.0160,<br>0.0112    | 0.785,<br>0.0341,<br>0.0158,<br>0.0113   | 0.981,<br>0.0539,<br>0.0157,<br>0.0114 | 1.000,<br>0.1032,<br>0.0155,<br>0.0116 |
| MR-IVW             | 0.073,<br>-0.0461,<br>0.1046,<br>0.104      | 0.047,<br>0.0039,<br>0.1046,<br>0.104   | 0.055,<br>0.0239,<br>0.1046,<br>0.104        | 0.074,<br>0.0439,<br>0.1046,<br>0.104    | 0.090,<br>0.0539,<br>0.1046,<br>0.104    | 0.102,<br>0.0639,<br>0.1046,<br>0.104     | 0.142,<br>0.0839,<br>0.1046,<br>0.104    | 0.178,<br>0.1039,<br>0.1046,<br>0.104  | 0.318,<br>0.1538,<br>0.1046,<br>0.104  |
| MR-IVW-Oracle      | 1.000,<br>-0.0998,<br>0.0112,<br>0.0114     | 0.991,<br>-0.0501,<br>0.0113,<br>0.0115 | 0.760,<br>-0.0302,<br>0.0113,<br>0.0116      | 0.139,<br>-0.0104,<br>0.0114,<br>0.0117  | 0.042,<br>-0.0004,<br>0.0114,<br>0.0117  | 0.117,<br>0.0095,<br>0.0114,<br>0.0118    | 0.706,<br>0.0293,<br>0.0115,<br>0.0119   | 0.984,<br>0.0492,<br>0.0116,<br>0.012  | 1.000,<br>0.0989,<br>0.0118,<br>0.0123 |
| MR-Egger           | 0.341,<br>0.4698,<br>0.4515,<br>0.3364      | 0.376,<br>0.5165,<br>0.4516,<br>0.3364  | 0.390,<br>0.5352,<br>0.4516,<br>0.3364       | 0.404,<br>0.5539,<br>0.4517,<br>0.3365   | 0.413,<br>0.5632,<br>0.4517,<br>0.3365   | 0.420,<br>0.5725,<br>0.4517,<br>0.3365    | 0.440,<br>0.5912,<br>0.4517,<br>0.3365   | 0.456,<br>0.6098,<br>0.4518,<br>0.3366 | 0.498,<br>0.6564,<br>0.4519,<br>0.3367 |
| MR-Weighted-Median | 1.000,<br>-0.1008,<br>0.0158,<br>0.0161     | 0.913,<br>-0.0535,<br>0.0164,<br>0.0163 | 0.549,<br>-0.0346,<br>0.0165,<br>0.0164      | 0.159,<br>-0.0157,<br>0.0167,<br>0.0165  | 0.071,<br>-0.0063,<br>0.0168,<br>0.0166  | 0.048,<br>0.0032,<br>0.0169,<br>0.0166    | 0.267,<br>0.0221,<br>0.0170,<br>0.0168   | 0.694,<br>0.0410,<br>0.0171,<br>0.0169 | 0.995,<br>0.0878,<br>0.0177,<br>0.0174 |
| MR-Weighted-Mode   | 0.848,<br>-0.0868,<br>0.3201,<br>0.185      | 0.540,<br>-0.0388,<br>0.3211,<br>0.1865 | 0.230,<br>-0.0186,<br>0.3215,<br>0.1867      | 0.033,<br>0.0019,<br>0.3219,<br>0.1868   | 0.017,<br>0.0118,<br>0.3222,<br>0.1868   | 0.036,<br>0.0206,<br>0.3223,<br>0.1868    | 0.192,<br>0.0393,<br>0.3228,<br>0.1868   | 0.489,<br>0.0577,<br>0.3231,<br>0.1869 | 0.839,<br>0.1079,<br>0.3239,<br>0.1871 |
| MR-RAPS1           | 0.078,<br>-0.0472,<br>0.1023,<br>0.1039     | 0.044,<br>0.0028,<br>0.1023,<br>0.1039  | 0.051,<br>0.0228,<br>0.1023,<br>0.1039       | 0.067,<br>0.0429,<br>0.1023,<br>0.1039   | 0.080,<br>0.0529,<br>0.1023,<br>0.1039   | 0.100,<br>0.0629,<br>0.1023,<br>0.1039    | 0.133,<br>0.0829,<br>0.1024,<br>0.1039   | 0.168,<br>0.1029,<br>0.1024,<br>0.1039 | 0.310,<br>0.1529,<br>0.1024,<br>0.104  |
| MR-RAPS2           | 0.110,<br>-0.0715,<br>0.1041,<br>0.1051     | 0.055,<br>-0.0215,<br>0.1041,<br>0.1051 | 0.049,<br>-0.0014,<br>0.1041,<br>0.1051      | 0.051,<br>0.0186,<br>0.1041,<br>0.1051   | 0.054,<br>0.0286,<br>0.1041,<br>0.1051   | 0.058,<br>0.0386,<br>0.1041,<br>0.1051    | 0.087,<br>0.0586,<br>0.1042,<br>0.1051   | 0.125,<br>0.0786,<br>0.1042,<br>0.1051 | 0.223,<br>0.1287,<br>0.1042,<br>0.1051 |
| MR-RAPS3           | 0.864,<br>-1.2666,<br>68.7670,<br>1087.3079 | 0.893,<br>0.3820,<br>10.4769,<br>7.9368 | 0.884,<br>-8.9530,<br>227.2274,<br>4070.7404 | 0.887,<br>0.0867,<br>13.0961,<br>11.3686 | 0.889,<br>2.9726,<br>68.4385,<br>1234.79 | 0.885,<br>1.4535,<br>29.6133,<br>158.5749 | 0.911,<br>0.4151,<br>13.2447,<br>23.6993 | 0.915,<br>1.2800,<br>7.4228,<br>6.3155 | 0.952,<br>0.8816,<br>2.3314,<br>1.291  |
| MR-RAPS4           | 0.999,<br>0.5523,<br>1.7444,<br>0.0571      | 0.999,<br>0.7790,<br>1.2723,<br>0.0271  | 0.9208,<br>0.9208,<br>4.1125,<br>0.091       | 0.853,<br>0.8560,<br>1.2464,<br>0.0273   | 0.836,<br>0.8779,<br>1.2527,<br>0.0279   | 0.861,<br>0.9026,<br>1.1729,<br>0.0264    | 0.972,<br>0.9476,<br>1.2062,<br>0.028    | 1.000,<br>0.9871,<br>1.0706,<br>0.0252 | 1.000,<br>1.0574,<br>0.9596,<br>0.0232 |

Table S84: Main simulations: in each cell, from top to bottom are empirical type-I error/power, mean( $\hat{\theta}$ ), SD( $\hat{\theta}$ ), mean(SE( $\hat{\theta}$ )) when  $m = 100$ , the InSIDE violated,  $q = 0.4$ , and  $n = 100000$ .

| Methods \ $\theta$ | -0.1                                     | -0.05                                   | -0.03                                   | -0.01                                     | 0                                       | 0.01                                    | 0.03                                   | 0.05                                   | 0.1                                    |
|--------------------|------------------------------------------|-----------------------------------------|-----------------------------------------|-------------------------------------------|-----------------------------------------|-----------------------------------------|----------------------------------------|----------------------------------------|----------------------------------------|
| cML-MA-AIC         | 1.000,<br>-0.0974,<br>0.0113,<br>0.0094  | 0.988,<br>-0.0476,<br>0.0113,<br>0.0095 | 0.786,<br>-0.0277,<br>0.0113,<br>0.0096 | 0.172,<br>-0.0087,<br>0.0104,<br>0.0095   | 0.071,<br>0.0002,<br>0.0102,<br>0.0095  | 0.180,<br>0.0090,<br>0.0106,<br>0.0096  | 0.777,<br>0.0281,<br>0.0115,<br>0.0098 | 0.987,<br>0.0480,<br>0.0117,<br>0.0099 | 1.000,<br>0.0977,<br>0.0119,<br>0.0102 |
| cML-MA-AIC-Profile | 1.000,<br>-0.0977,<br>0.0113,<br>0.0094  | 0.988,<br>-0.0477,<br>0.0114,<br>0.0095 | 0.782,<br>-0.0277,<br>0.0113,<br>0.0096 | 0.171,<br>-0.0087,<br>0.0104,<br>0.0096   | 0.070,<br>0.0002,<br>0.0102,<br>0.0095  | 0.178,<br>0.0090,<br>0.0106,<br>0.0096  | 0.776,<br>0.0281,<br>0.0115,<br>0.0098 | 0.987,<br>0.0480,<br>0.0117,<br>0.0099 | 1.000,<br>0.0980,<br>0.0120,<br>0.0102 |
| cML-AIC            | 1.000,<br>-0.0985,<br>0.0117,<br>0.0085  | 0.997,<br>-0.0488,<br>0.0117,<br>0.0086 | 0.844,<br>-0.0289,<br>0.0087            | 0.259,<br>-0.0093,<br>0.0115,<br>0.0087   | 0.135,<br>0.0002,<br>0.0115,<br>0.0088  | 0.266,<br>0.0096,<br>0.0117,<br>0.0088  | 0.837,<br>0.0294,<br>0.0121,<br>0.0089 | 0.998,<br>0.0492,<br>0.0121,<br>0.0089 | 1.000,<br>0.0991,<br>0.0123,<br>0.0092 |
| cML-AIC-Profile    | 1.000,<br>-0.0987,<br>0.0117,<br>0.0086  | 0.997,<br>-0.0488,<br>0.0117,<br>0.0087 | 0.844,<br>-0.0289,<br>0.0118,<br>0.0087 | 0.258,<br>-0.0093,<br>0.0115,<br>0.0088   | 0.133,<br>0.0002,<br>0.0115,<br>0.0088  | 0.264,<br>0.0096,<br>0.0117,<br>0.0088  | 0.835,<br>0.0294,<br>0.0121,<br>0.0089 | 0.997,<br>0.0493,<br>0.0121,<br>0.0089 | 1.000,<br>0.0993,<br>0.0125,<br>0.0092 |
| cML-MA-BIC         | 1.000,<br>-0.0998,<br>0.0082,<br>0.0079  | 1.000,<br>-0.0498,<br>0.0082,<br>0.008  | 0.946,<br>-0.0298,<br>0.0083,<br>0.008  | 0.239,<br>-0.0098,<br>0.0083,<br>0.0081   | 0.058,<br>0.0002,<br>0.0083,<br>0.0081  | 0.245,<br>0.0102,<br>0.0084,<br>0.0081  | 0.951,<br>0.0301,<br>0.0084,<br>0.0082 | 1.000,<br>0.0502,<br>0.0085,<br>0.0083 | 1.000,<br>0.1002,<br>0.0087,<br>0.0085 |
| cML-MA-BIC-Profile | 1.000,<br>-0.0998,<br>0.0082,<br>0.0079  | 1.000,<br>-0.0498,<br>0.0082,<br>0.008  | 0.946,<br>-0.0298,<br>0.0083,<br>0.008  | 0.236,<br>-0.0098,<br>0.0083,<br>0.0081   | 0.058,<br>0.0002,<br>0.0083,<br>0.0081  | 0.241,<br>0.0102,<br>0.0084,<br>0.0082  | 0.951,<br>0.0301,<br>0.0084,<br>0.0082 | 1.000,<br>0.0502,<br>0.0085,<br>0.0083 | 1.000,<br>0.1002,<br>0.0087,<br>0.0085 |
| cML-BIC            | 1.000,<br>-0.0999,<br>0.0082,<br>0.0078  | 1.000,<br>-0.0498,<br>0.0082,<br>0.0079 | 0.949,<br>-0.0298,<br>0.0083,<br>0.008  | 0.245,<br>-0.0098,<br>0.0083,<br>0.008    | 0.060,<br>0.0002,<br>0.0083,<br>0.008   | 0.247,<br>0.0102,<br>0.0084,<br>0.0081  | 0.958,<br>0.0302,<br>0.0084,<br>0.0081 | 1.000,<br>0.0502,<br>0.0085,<br>0.0082 | 1.000,<br>0.1002,<br>0.0087,<br>0.0084 |
| cML-BIC-Profile    | 1.000,<br>-0.0999,<br>0.0082,<br>0.0078  | 1.000,<br>-0.0498,<br>0.0082,<br>0.0079 | 0.949,<br>-0.0298,<br>0.0083,<br>0.008  | 0.242,<br>-0.0098,<br>0.0083,<br>0.008    | 0.060,<br>0.0002,<br>0.0083,<br>0.0081  | 0.247,<br>0.0102,<br>0.0084,<br>0.0081  | 0.958,<br>0.0302,<br>0.0084,<br>0.0082 | 1.000,<br>0.0502,<br>0.0085,<br>0.0082 | 1.000,<br>0.1002,<br>0.0087,<br>0.0084 |
| MR-Mix             | 1.000,<br>-0.1017,<br>0.0101,<br>0.0134  | 0.985,<br>-0.0501,<br>0.0099,<br>0.0133 | 0.652,<br>-0.0299,<br>0.0099,<br>0.0133 | 0.055,<br>-0.0099,<br>0.0099,<br>0.0132   | 0.004,<br>-0.0001,<br>0.0099,<br>0.0132 | 0.049,<br>0.0097,<br>0.0099,<br>0.0132  | 0.637,<br>0.0292,<br>0.0099,<br>0.0132 | 0.986,<br>0.0484,<br>0.0099,<br>0.0132 | 1.000,<br>0.0948,<br>0.0096,<br>0.0131 |
| MR-ContMix         | 1.000,<br>-0.0995,<br>0.0083,<br>NA      | 1.000,<br>-0.0496,<br>0.0084,<br>NA     | 0.942,<br>-0.0297,<br>0.0084,<br>NA     | 0.245,<br>-0.0098,<br>0.0085,<br>NA       | 0.067,<br>0.0002,<br>0.0085,<br>NA      | 0.246,<br>0.0102,<br>0.0085,<br>NA      | 0.951,<br>0.0301,<br>0.0086,<br>NA     | 1.000,<br>0.0500,<br>0.0086,<br>NA     | 1.000,<br>0.0998,<br>0.0088,<br>NA     |
| MR-Lasso           | 1.000,<br>-0.0994,<br>0.0087,<br>0.0079  | 1.000,<br>-0.0496,<br>0.0087,<br>0.0081 | 0.934,<br>-0.0297,<br>0.0087,<br>0.0081 | 0.248,<br>-0.0097,<br>0.0087,<br>0.0082   | 0.072,<br>0.0003,<br>0.0088,<br>0.0082  | 0.254,<br>0.0102,<br>0.0088,<br>0.0082  | 0.944,<br>0.0301,<br>0.0090,<br>0.0083 | 1.000,<br>0.0501,<br>0.0090,<br>0.0083 | 1.000,<br>0.0998,<br>0.0092,<br>0.0085 |
| MR-PRESSO          | 0.973,<br>-0.0904,<br>0.0234,<br>0.0082  | 0.877,<br>-0.0409,<br>0.0234,<br>0.0082 | 0.775,<br>-0.0211,<br>0.0234,<br>0.0082 | 0.409,<br>-0.0013,<br>0.0229,<br>0.0082   | 0.337,<br>0.0085,<br>0.0229,<br>0.0083  | 0.477,<br>0.0184,<br>0.0228,<br>0.0083  | 0.918,<br>0.0382,<br>0.0225,<br>0.0083 | 0.987,<br>0.0580,<br>0.0223,<br>0.0084 | 0.999,<br>0.1074,<br>0.0217,<br>0.0085 |
| MR-IVW             | 0.101,<br>-0.0481,<br>0.1118,<br>0.1042  | 0.067,<br>0.0020,<br>0.1118,<br>0.1042  | 0.077,<br>0.0221,<br>0.1118,<br>0.1042  | 0.095,<br>0.0421,<br>0.1118,<br>0.1042    | 0.102,<br>0.0522,<br>0.1118,<br>0.1042  | 0.126,<br>0.0622,<br>0.1118,<br>0.1042  | 0.148,<br>0.0822,<br>0.1118,<br>0.1042 | 0.181,<br>0.1023,<br>0.1118,<br>0.1042 | 0.299,<br>0.1524,<br>0.1118,<br>0.1042 |
| MR-IVW-Oracle      | 1.000,<br>-0.0995,<br>0.0081,<br>0.0081  | 1.000,<br>-0.0496,<br>0.0082,<br>0.0082 | 0.942,<br>-0.0297,<br>0.0082,<br>0.0082 | 0.224,<br>-0.0098,<br>0.0082,<br>0.0083   | 0.055,<br>0.0002,<br>0.0083,<br>0.0083  | 0.228,<br>0.0102,<br>0.0083,<br>0.0084  | 0.947,<br>0.0301,<br>0.0083,<br>0.0084 | 1.000,<br>0.0500,<br>0.0084,<br>0.0085 | 1.000,<br>0.0998,<br>0.0086,<br>0.0087 |
| MR-Egger           | 0.351,<br>0.5000,<br>0.4731,<br>0.3425   | 0.388,<br>0.5484,<br>0.4731,<br>0.3425  | 0.404,<br>0.5677,<br>0.4731,<br>0.3425  | 0.419,<br>0.5870,<br>0.4731,<br>0.3426    | 0.426,<br>0.5967,<br>0.4731,<br>0.3426  | 0.430,<br>0.6063,<br>0.4731,<br>0.3426  | 0.445,<br>0.6257,<br>0.4731,<br>0.3426 | 0.464,<br>0.6450,<br>0.4731,<br>0.3426 | 0.503,<br>0.6932,<br>0.4732,<br>0.3426 |
| MR-Weighted-Median | 1.000,<br>-0.1007,<br>0.0114,<br>0.0114  | 0.991,<br>-0.0524,<br>0.0115,<br>0.0115 | 0.814,<br>-0.0330,<br>0.0116,<br>0.0116 | 0.219,<br>-0.0136,<br>0.0118,<br>0.0117   | 0.072,<br>-0.0039,<br>0.0118,<br>0.0117 | 0.081,<br>0.0058,<br>0.0119,<br>0.0118  | 0.548,<br>0.0251,<br>0.0121,<br>0.0119 | 0.954,<br>0.0443,<br>0.0123,<br>0.0123 | 1.000,<br>0.0924,<br>0.0128,<br>0.0123 |
| MR-Weighted-Mode   | 0.924,<br>-0.0893,<br>0.3749,<br>0.1024  | 0.734,<br>-0.0402,<br>0.3749,<br>0.1027 | 0.396,<br>-0.0215,<br>0.3746,<br>0.103  | 0.048,<br>-0.0025,<br>0.3738,<br>0.1031   | 0.018,<br>0.0079,<br>0.3734,<br>0.1032  | 0.052,<br>0.0182,<br>0.3730,<br>0.1032  | 0.374,<br>0.0369,<br>0.3722,<br>0.1034 | 0.749,<br>0.0566,<br>0.3713,<br>0.1037 | 0.916,<br>0.1059,<br>0.3692,<br>0.1041 |
| MR-RAPS1           | 0.097,<br>-0.0497,<br>0.1092,<br>0.1037  | 0.065,<br>0.0003,<br>0.1092,<br>0.1037  | 0.069,<br>0.0203,<br>0.1092,<br>0.1037  | 0.089,<br>0.0404,<br>0.1092,<br>0.1037    | 0.098,<br>0.0504,<br>0.1092,<br>0.1037  | 0.109,<br>0.0604,<br>0.1092,<br>0.1037  | 0.138,<br>0.0804,<br>0.1092,<br>0.1037 | 0.174,<br>0.1004,<br>0.1092,<br>0.1038 | 0.293,<br>0.1504,<br>0.1092,<br>0.1038 |
| MR-RAPS2           | 0.127,<br>-0.0731,<br>0.1112,<br>0.1047  | 0.076,<br>-0.0231,<br>0.1113,<br>0.1048 | 0.063,<br>-0.0035,<br>0.1111,<br>0.1048 | 0.072,<br>0.0169,<br>0.1113,<br>0.1048    | 0.080,<br>0.0266,<br>0.1108,<br>0.1047  | 0.085,<br>0.0366,<br>0.1111,<br>0.1048  | 0.104,<br>0.0566,<br>0.1111,<br>0.1048 | 0.132,<br>0.0753,<br>0.1096,<br>0.1045 | 0.226,<br>0.1257,<br>0.1104,<br>0.1046 |
| MR-RAPS3           | 0.920,<br>-4.2014,<br>136.2241,<br>961.1 | 0.916,<br>0.4917,<br>14.6667,<br>14.1   | 0.908,<br>4.5525,<br>116.2892,<br>264   | 0.910,<br>-14.1242,<br>501.7183,<br>10180 | 0.909,<br>1.2589,<br>38.5047,<br>125.4  | 0.914,<br>-5.5832,<br>202.6511,<br>2083 | 0.920,<br>1.5148,<br>24.0154,<br>19.03 | 0.953,<br>0.8808,<br>2.1430,<br>0.5891 | 0.970,<br>0.8017,<br>2.5321,<br>0.4719 |
| MR-RAPS4           | 0.999,<br>0.7460,<br>3.2510,<br>0.0875   | 1.000,<br>0.7666,<br>1.4070,<br>0.0228  | 0.999,<br>0.8381,<br>1.3410,<br>0.0215  | 0.941,<br>0.8566,<br>1.3580,<br>0.0259    | 0.893,<br>0.8719,<br>1.3516,<br>0.0223  | 0.927,<br>1.0403,<br>4.6978,<br>0.5823  | 0.998,<br>0.9122,<br>1.3008,<br>0.0207 | 1.000,<br>0.9391,<br>1.2918,<br>0.0205 | 1.000,<br>1.0060,<br>1.2068,<br>0.0211 |

Table S85: Main simulations: in each cell, from top to bottom are empirical type-I error/power, mean( $\hat{\theta}$ ), SD( $\hat{\theta}$ ), mean(SE( $\hat{\theta}$ )) when  $m = 100$ , the InSIDE violated,  $q = 0.4$ , and  $n = 200000$ .

| Methods \ $\theta$ | -0.1                                    | -0.05                                   | -0.03                                   | -0.01                                   | 0                                       | 0.01                                     | 0.03                                    | 0.05                                    | 0.1                                    |
|--------------------|-----------------------------------------|-----------------------------------------|-----------------------------------------|-----------------------------------------|-----------------------------------------|------------------------------------------|-----------------------------------------|-----------------------------------------|----------------------------------------|
| cML-MA-AIC         | 1.000,<br>-0.0984,<br>0.0081,<br>0.0066 | 1.000,<br>-0.0485,<br>0.0082,<br>0.0067 | 0.959,<br>-0.0285,<br>0.0083,<br>0.0067 | 0.278,<br>-0.0089,<br>0.0078,<br>0.0067 | 0.086,<br>0.0001,<br>0.0074,<br>0.0067  | 0.286,<br>0.0090,<br>0.0078,<br>0.0068   | 0.953,<br>0.0286,<br>0.0084,<br>0.0069  | 1.000,<br>0.0485,<br>0.0085,<br>0.007   | 1.000,<br>0.0983,<br>0.0087,<br>0.0072 |
| cML-MA-AIC-Profile | 1.000,<br>-0.0986,<br>0.0081,<br>0.0067 | 1.000,<br>-0.0485,<br>0.0082,<br>0.0067 | 0.957,<br>-0.0286,<br>0.0083,<br>0.0068 | 0.277,<br>-0.0089,<br>0.0078,<br>0.0068 | 0.085,<br>0.0001,<br>0.0074,<br>0.0067  | 0.285,<br>0.0090,<br>0.0078,<br>0.0068   | 0.953,<br>0.0286,<br>0.0084,<br>0.0069  | 1.000,<br>0.0485,<br>0.0085,<br>0.007   | 1.000,<br>0.0985,<br>0.0087,<br>0.0072 |
| cML-AIC            | 1.000,<br>-0.0993,<br>0.0085,<br>0.006  | 1.000,<br>-0.0494,<br>0.0086,<br>0.0061 | 0.968,<br>-0.0294,<br>0.0086,<br>0.0061 | 0.387,<br>-0.0095,<br>0.0086,<br>0.0062 | 0.145,<br>0.0001,<br>0.0084,<br>0.0062  | 0.370,<br>0.0096,<br>0.0085,<br>0.0062   | 0.973,<br>0.0295,<br>0.0087,<br>0.0063  | 1.000,<br>0.0494,<br>0.0088,<br>0.0063  | 1.000,<br>0.0993,<br>0.0091,<br>0.0065 |
| cML-AIC-Profile    | 1.000,<br>-0.0994,<br>0.0086,<br>0.006  | 1.000,<br>-0.0494,<br>0.0086,<br>0.0061 | 0.968,<br>-0.0294,<br>0.0086,<br>0.0061 | 0.381,<br>-0.0095,<br>0.0086,<br>0.0062 | 0.144,<br>0.0001,<br>0.0084,<br>0.0062  | 0.369,<br>0.0096,<br>0.0085,<br>0.0062   | 0.973,<br>0.0295,<br>0.0087,<br>0.0063  | 1.000,<br>0.0494,<br>0.0089,<br>0.0063  | 1.000,<br>0.0994,<br>0.0091,<br>0.0065 |
| cML-MA-BIC         | 1.000,<br>-0.1000,<br>0.0056,<br>0.0056 | 1.000,<br>-0.0500,<br>0.0056,<br>0.0056 | 0.999,<br>-0.0300,<br>0.0056,<br>0.0057 | 0.427,<br>-0.0100,<br>0.0057,<br>0.0057 | 0.045,<br>0.0000,<br>0.0057,<br>0.0057  | 0.412,<br>0.0100,<br>0.0057,<br>0.0057   | 1.000,<br>0.0300,<br>0.0057,<br>0.0058  | 1.000,<br>0.0500,<br>0.0058,<br>0.0058  | 1.000,<br>0.1000,<br>0.0059,<br>0.006  |
| cML-MA-BIC-Profile | 1.000,<br>-0.1001,<br>0.0056,<br>0.0056 | 1.000,<br>-0.0500,<br>0.0056,<br>0.0056 | 0.999,<br>-0.0300,<br>0.0056,<br>0.0057 | 0.426,<br>-0.0100,<br>0.0057,<br>0.0057 | 0.045,<br>0.0000,<br>0.0057,<br>0.0057  | 0.411,<br>0.0100,<br>0.0057,<br>0.0057   | 1.000,<br>0.0300,<br>0.0057,<br>0.0058  | 1.000,<br>0.0500,<br>0.0058,<br>0.0058  | 1.000,<br>0.1000,<br>0.0059,<br>0.006  |
| cML-BIC            | 1.000,<br>-0.1001,<br>0.0056,<br>0.0055 | 1.000,<br>-0.0501,<br>0.0056,<br>0.0056 | 0.998,<br>-0.0301,<br>0.0057,<br>0.0056 | 0.431,<br>-0.0101,<br>0.0057,<br>0.0057 | 0.045,<br>-0.0001,<br>0.0057,<br>0.0057 | 0.418,<br>0.0099,<br>0.0057,<br>0.0057   | 1.000,<br>0.0299,<br>0.0058,<br>0.0058  | 1.000,<br>0.0500,<br>0.0058,<br>0.0058  | 1.000,<br>0.1000,<br>0.0059,<br>0.0059 |
| cML-BIC-Profile    | 1.000,<br>-0.1001,<br>0.0056,<br>0.0055 | 1.000,<br>-0.0501,<br>0.0056,<br>0.0056 | 0.998,<br>-0.0301,<br>0.0057,<br>0.0056 | 0.431,<br>-0.0101,<br>0.0057,<br>0.0057 | 0.045,<br>-0.0001,<br>0.0057,<br>0.0057 | 0.417,<br>0.0099,<br>0.0057,<br>0.0057   | 1.000,<br>0.0299,<br>0.0058,<br>0.0058  | 1.000,<br>0.0500,<br>0.0058,<br>0.0058  | 1.000,<br>0.1000,<br>0.0059,<br>0.006  |
| MR-Mix             | 1.000,<br>-0.1024,<br>0.0078,<br>0.0103 | 0.997,<br>-0.0505,<br>0.0076,<br>0.0102 | 0.879,<br>-0.0301,<br>0.0076,<br>0.0102 | 0.150,<br>-0.0101,<br>0.0076,<br>0.0102 | 0.018,<br>-0.0002,<br>0.0076,<br>0.0102 | 0.134,<br>0.0097,<br>0.0076,<br>0.0101   | 0.871,<br>0.0291,<br>0.0077,<br>0.0101  | 0.999,<br>0.0482,<br>0.0075,<br>0.0101  | 1.000,<br>0.0945,<br>0.0075,<br>0.0102 |
| MR-ContMix         | 1.000,<br>-0.0998,<br>0.0056,<br>NA     | 1.000,<br>-0.0499,<br>0.0057,<br>NA     | 0.997,<br>-0.0300,<br>0.0057,<br>NA     | 0.437,<br>-0.0100,<br>0.0057,<br>NA     | 0.051,<br>0.0000,<br>0.0057,<br>NA      | 0.418,<br>0.0100,<br>0.0058,<br>NA       | 1.000,<br>0.0300,<br>0.0058,<br>NA      | 1.000,<br>0.0499,<br>0.0059,<br>NA      | 1.000,<br>0.0998,<br>0.0060,<br>NA     |
| MR-Lasso           | 1.000,<br>-0.0999,<br>0.0058,<br>0.0056 | 1.000,<br>-0.0500,<br>0.0058,<br>0.0057 | 0.998,<br>-0.0300,<br>0.0058,<br>0.0057 | 0.418,<br>-0.0100,<br>0.0058,<br>0.0058 | 0.050,<br>0.0000,<br>0.0059,<br>0.0058  | 0.406,<br>0.0100,<br>0.0059,<br>0.0058   | 1.000,<br>0.0299,<br>0.0059,<br>0.0059  | 1.000,<br>0.0499,<br>0.0060,<br>0.0059  | 1.000,<br>0.0998,<br>0.0061,<br>0.006  |
| MR-PRESSO          | 0.944,<br>-0.0840,<br>0.0417,<br>0.0079 | 0.826,<br>-0.0349,<br>0.0397,<br>0.0077 | 0.792,<br>-0.0153,<br>0.0387,<br>0.0076 | 0.529,<br>0.0043,<br>0.0377,<br>0.0076  | 0.461,<br>0.0142,<br>0.0377,<br>0.0076  | 0.667,<br>0.0241,<br>0.0377,<br>0.0076   | 0.959,<br>0.0437,<br>0.0367,<br>0.0074  | 0.978,<br>0.0633,<br>0.0377,<br>0.0075  | 0.993,<br>0.1118,<br>0.0321,<br>0.0071 |
| MR-IVW             | 0.076,<br>-0.0409,<br>0.1104,<br>0.1038 | 0.069,<br>0.0094,<br>0.1104,<br>0.1038  | 0.092,<br>0.0295,<br>0.1104,<br>0.1038  | 0.105,<br>0.0495,<br>0.1104,<br>0.1038  | 0.127,<br>0.0596,<br>0.1104,<br>0.1038  | 0.138,<br>0.0696,<br>0.1104,<br>0.1038   | 0.169,<br>0.0897,<br>0.1104,<br>0.1038  | 0.202,<br>0.1098,<br>0.1104,<br>0.1038  | 0.353,<br>0.1600,<br>0.1104,<br>0.1038 |
| MR-IVW-Oracle      | 1.000,<br>-0.0999,<br>0.0056,<br>0.0057 | 1.000,<br>-0.0500,<br>0.0056,<br>0.0058 | 0.998,<br>-0.0300,<br>0.0056,<br>0.0058 | 0.404,<br>-0.0100,<br>0.0057,<br>0.0058 | 0.040,<br>-0.0001,<br>0.0057,<br>0.0059 | 0.394,<br>0.0099,<br>0.0057,<br>0.0059   | 0.999,<br>0.0299,<br>0.0057,<br>0.0059  | 1.000,<br>0.0499,<br>0.0058,<br>0.006   | 1.000,<br>0.0998,<br>0.0059,<br>0.0061 |
| MR-Egger           | 0.370,<br>0.5112,<br>0.4918,<br>0.3434  | 0.405,<br>0.5606,<br>0.4917,<br>0.3435  | 0.421,<br>0.5803,<br>0.4917,<br>0.3435  | 0.444,<br>0.6000,<br>0.4917,<br>0.3435  | 0.452,<br>0.6098,<br>0.4917,<br>0.3435  | 0.463,<br>0.6197,<br>0.4917,<br>0.3435   | 0.476,<br>0.6393,<br>0.4917,<br>0.3435  | 0.494,<br>0.6590,<br>0.4917,<br>0.3435  | 0.539,<br>0.7081,<br>0.4916,<br>0.3435 |
| MR-Weighted-Median | 1.000,<br>-0.1010,<br>0.0080,<br>0.008  | 1.000,<br>-0.0520,<br>0.0082,<br>0.0081 | 0.978,<br>-0.0324,<br>0.0082,<br>0.0082 | 0.339,<br>-0.0128,<br>0.0083,<br>0.0082 | 0.068,<br>-0.0030,<br>0.0083,<br>0.0083 | 0.129,<br>0.0068,<br>0.0084,<br>0.0083   | 0.882,<br>0.0263,<br>0.0085,<br>0.0084  | 0.997,<br>0.0459,<br>0.0086,<br>0.0084  | 1.000,<br>0.0947,<br>0.0090,<br>0.0087 |
| MR-Weighted-Mode   | 0.955,<br>-0.0956,<br>0.1314,<br>0.0516 | 0.862,<br>-0.0457,<br>0.1313,<br>0.0517 | 0.572,<br>-0.0253,<br>0.1312,<br>0.0518 | 0.091,<br>-0.0048,<br>0.1315,<br>0.0518 | 0.016,<br>0.0053,<br>0.1314,<br>0.052   | 0.084,<br>0.0151,<br>0.1313,<br>0.0521   | 0.588,<br>0.0349,<br>0.1312,<br>0.0521  | 0.856,<br>0.0546,<br>0.1309,<br>0.0521  | 0.957,<br>0.1041,<br>0.1307,<br>0.0523 |
| MR-RAPS1           | 0.078,<br>-0.0416,<br>0.1086,<br>0.1033 | 0.065,<br>0.0084,<br>0.1086,<br>0.1033  | 0.079,<br>0.0284,<br>0.1086,<br>0.1033  | 0.107,<br>0.0484,<br>0.1086,<br>0.1033  | 0.122,<br>0.0584,<br>0.1086,<br>0.1033  | 0.130,<br>0.0684,<br>0.1086,<br>0.1033   | 0.154,<br>0.0884,<br>0.1086,<br>0.1033  | 0.195,<br>0.1084,<br>0.1086,<br>0.1033  | 0.335,<br>0.1585,<br>0.1086,<br>0.1033 |
| MR-RAPS2           | 0.789,<br>-0.1567,<br>0.0695,<br>0.0538 | 0.516,<br>-0.1006,<br>0.0753,<br>0.0587 | 0.422,<br>-0.0770,<br>0.0795,<br>0.0607 | 0.327,<br>-0.0523,<br>0.0835,<br>0.064  | 0.281,<br>-0.0398,<br>0.0850,<br>0.0659 | 0.236,<br>-0.0292,<br>0.0852,<br>0.067   | 0.165,<br>-0.0049,<br>0.0866,<br>0.0707 | 0.130,<br>0.0202,<br>0.0896,<br>0.0739  | 0.195,<br>0.0859,<br>0.0974,<br>0.0828 |
| MR-RAPS3           | 0.943,<br>0.3306,<br>27.5163,<br>21.53  | 0.944,<br>1.0042,<br>26.5163,<br>53.14  | 0.941,<br>-0.7208,<br>26.6908,<br>23.05 | 0.945,<br>0.4942,<br>14.3938,<br>6.016  | 0.934,<br>0.9393,<br>10.2557,<br>7.132  | 0.948,<br>26.8984,<br>826.3173,<br>20840 | 0.949,<br>1.1222,<br>16.4003,<br>10.52  | 0.952,<br>-2.1333,<br>68.5526,<br>269.6 | 0.974,<br>0.0435,<br>27.4894,<br>56.52 |
| MR-RAPS4           | 1.000,<br>0.7092,<br>1.6767,<br>0.022   | 1.000,<br>0.7537,<br>2.7266,<br>0.0545  | 1.000,<br>0.9134,<br>1.4843,<br>0.0175  | 1.000,<br>0.9259,<br>1.4549,<br>0.0172  | 0.966,<br>0.9613,<br>1.4161,<br>0.0167  | 0.937,<br>0.9620,<br>1.3361,<br>0.0155   | 1.000,<br>0.9878,<br>1.3782,<br>0.016   | 1.000,<br>1.0207,<br>1.3258,<br>0.0158  | 1.000,<br>1.0632,<br>1.2758,<br>0.0161 |

Table S86: Main simulations: in each cell, from top to bottom are empirical type-I error/power, mean( $\hat{\theta}$ ), SD( $\hat{\theta}$ ), mean(SE( $\hat{\theta}$ )) when  $m = 100$ , the InSIDE violated,  $q = 0.6$ , and  $n = 50000$ .

| Methods \ $\theta$ | -0.1                                    | -0.05                                        | -0.03                                   | -0.01                                     | 0                                       | 0.01                                     | 0.03                                   | 0.05                                    | 0.1                                     |
|--------------------|-----------------------------------------|----------------------------------------------|-----------------------------------------|-------------------------------------------|-----------------------------------------|------------------------------------------|----------------------------------------|-----------------------------------------|-----------------------------------------|
| cML-MA-AIC         | 0.998,<br>-0.0949,<br>0.0203,<br>0.0176 | 0.700,<br>-0.0452,<br>0.0203,<br>0.0178      | 0.322,<br>-0.0262,<br>0.0193,<br>0.0177 | 0.087,<br>-0.0082,<br>0.0181,<br>0.0177   | 0.063,<br>0.0004,<br>0.0180,<br>0.0177  | 0.092,<br>0.0089,<br>0.0183,<br>0.0178   | 0.343,<br>0.0268,<br>0.0199,<br>0.0181 | 0.678,<br>0.0459,<br>0.0209,<br>0.0184  | 0.990,<br>0.0955,<br>0.0219,<br>0.0188  |
| cML-MA-AIC-Profile | 0.998,<br>-0.0952,<br>0.0204,<br>0.0178 | 0.697,<br>-0.0453,<br>0.0204,<br>0.0179      | 0.321,<br>-0.0262,<br>0.0194,<br>0.0179 | 0.084,<br>-0.0082,<br>0.0182,<br>0.0178   | 0.063,<br>0.0004,<br>0.0180,<br>0.0178  | 0.089,<br>0.0089,<br>0.0184,<br>0.0178   | 0.343,<br>0.0268,<br>0.0199,<br>0.0182 | 0.673,<br>0.0460,<br>0.0210,<br>0.0185  | 0.989,<br>0.0958,<br>0.0221,<br>0.019   |
| cML-AIC            | 0.998,<br>-0.0978,<br>0.0210,<br>0.0158 | 0.795,<br>-0.0480,<br>0.0212,<br>0.016       | 0.442,<br>-0.0283,<br>0.0209,<br>0.0161 | 0.158,<br>-0.0091,<br>0.0203,<br>0.0162   | 0.125,<br>0.0003,<br>0.0204,<br>0.0162  | 0.155,<br>0.0096,<br>0.0205,<br>0.0163   | 0.433,<br>0.0287,<br>0.0215,<br>0.0164 | 0.774,<br>0.0484,<br>0.0220,<br>0.0165  | 0.994,<br>0.0982,<br>0.0229,<br>0.0169  |
| cML-AIC-Profile    | 0.998,<br>-0.0979,<br>0.0211,<br>0.0159 | 0.793,<br>-0.0481,<br>0.0212,<br>0.0161      | 0.436,<br>-0.0283,<br>0.0209,<br>0.0162 | 0.153,<br>-0.0091,<br>0.0203,<br>0.0163   | 0.126,<br>0.0003,<br>0.0204,<br>0.0163  | 0.152,<br>0.0096,<br>0.0205,<br>0.0164   | 0.431,<br>0.0288,<br>0.0215,<br>0.0165 | 0.769,<br>0.0484,<br>0.0221,<br>0.0166  | 0.994,<br>0.0985,<br>0.0231,<br>0.017   |
| cML-MA-BIC         | 1.000,<br>-0.0996,<br>0.0150,<br>0.0147 | 0.916,<br>-0.0496,<br>0.0151,<br>0.0149      | 0.481,<br>-0.0296,<br>0.0152,<br>0.0149 | 0.116,<br>-0.0096,<br>0.0153,<br>0.015    | 0.050,<br>0.0003,<br>0.0153,<br>0.0151  | 0.103,<br>0.0103,<br>0.0154,<br>0.0151   | 0.534,<br>0.0303,<br>0.0155,<br>0.0152 | 0.885,<br>0.0503,<br>0.0156,<br>0.0154  | 1.000,<br>0.1003,<br>0.0160,<br>0.0157  |
| cML-MA-BIC-Profile | 1.000,<br>-0.0996,<br>0.0150,<br>0.0148 | 0.916,<br>-0.0496,<br>0.0151,<br>0.0149      | 0.479,<br>-0.0296,<br>0.0152,<br>0.015  | 0.115,<br>-0.0096,<br>0.0153,<br>0.0151   | 0.049,<br>0.0003,<br>0.0153,<br>0.0151  | 0.100,<br>0.0103,<br>0.0154,<br>0.0152   | 0.534,<br>0.0303,<br>0.0155,<br>0.0153 | 0.882,<br>0.0503,<br>0.0156,<br>0.0154  | 1.000,<br>0.1003,<br>0.0160,<br>0.0158  |
| cML-BIC            | 1.000,<br>-0.0996,<br>0.0150,<br>0.0146 | 0.923,<br>-0.0496,<br>0.0151,<br>0.0147      | 0.495,<br>-0.0296,<br>0.0152,<br>0.0148 | 0.123,<br>-0.0096,<br>0.0153,<br>0.0149   | 0.054,<br>0.0004,<br>0.0154,<br>0.0149  | 0.110,<br>0.0104,<br>0.0154,<br>0.015    | 0.543,<br>0.0303,<br>0.0155,<br>0.0151 | 0.888,<br>0.0503,<br>0.0156,<br>0.0152  | 1.000,<br>0.1003,<br>0.0160,<br>0.0155  |
| cML-BIC-Profile    | 1.000,<br>-0.0996,<br>0.0150,<br>0.0146 | 0.921,<br>-0.0496,<br>0.0151,<br>0.0148      | 0.492,<br>-0.0296,<br>0.0152,<br>0.0149 | 0.120,<br>-0.0096,<br>0.0153,<br>0.015    | 0.054,<br>0.0004,<br>0.0154,<br>0.015   | 0.106,<br>0.0104,<br>0.0154,<br>0.015    | 0.541,<br>0.0303,<br>0.0155,<br>0.0152 | 0.887,<br>0.0503,<br>0.0156,<br>0.0153  | 1.000,<br>0.1003,<br>0.0160,<br>0.0156  |
| MR-Mix             | 1.000,<br>-0.0946,<br>0.0151,<br>0.0172 | 0.780,<br>-0.0467,<br>0.0151,<br>0.0171      | 0.324,<br>-0.0278,<br>0.0151,<br>0.0171 | 0.057,<br>-0.0093,<br>0.0151,<br>0.0171   | 0.020,<br>-0.0002,<br>0.0149,<br>0.0171 | 0.047,<br>0.0091,<br>0.0149,<br>0.017    | 0.317,<br>0.0273,<br>0.0150,<br>0.017  | 0.750,<br>0.0453,<br>0.0152,<br>0.017   | 0.999,<br>0.0887,<br>0.0151,<br>0.017   |
| MR-ContMix         | 1.000,<br>-0.0989,<br>0.0152,<br>NA     | 0.910,<br>-0.0493,<br>0.0154,<br>NA          | 0.496,<br>-0.0295,<br>0.0155,<br>NA     | 0.123,<br>-0.0097,<br>0.0156,<br>NA       | 0.057,<br>0.0002,<br>0.0156,<br>NA      | 0.110,<br>0.0101,<br>0.0157,<br>NA       | 0.531,<br>0.0300,<br>0.0158,<br>NA     | 0.879,<br>0.0499,<br>0.0159,<br>NA      | 1.000,<br>0.0995,<br>0.0164,<br>NA      |
| MR-Lasso           | 1.000,<br>-0.0990,<br>0.0156,<br>0.0148 | 0.899,<br>-0.0493,<br>0.0157,<br>0.015       | 0.474,<br>-0.0296,<br>0.0158,<br>0.0151 | 0.115,<br>-0.0097,<br>0.0158,<br>0.0152   | 0.059,<br>0.0002,<br>0.0160,<br>0.0153  | 0.117,<br>0.0103,<br>0.0162,<br>0.0153   | 0.519,<br>0.0301,<br>0.0164,<br>0.0154 | 0.871,<br>0.0501,<br>0.0163,<br>0.0155  | 0.999,<br>0.0996,<br>0.0172,<br>0.0158  |
| MR-PRESSO          | 0.968,<br>-0.0907,<br>0.0249,<br>0.0143 | 0.760,<br>-0.0413,<br>0.0243,<br>0.0144      | 0.423,<br>-0.0217,<br>0.0240,<br>0.0145 | 0.184,<br>-0.0020,<br>0.0241,<br>0.0146   | 0.182,<br>0.0079,<br>0.0239,<br>0.0146  | 0.261,<br>0.0177,<br>0.0239,<br>0.0146   | 0.642,<br>0.0374,<br>0.0237,<br>0.0147 | 0.916,<br>0.0571,<br>0.0237,<br>0.0148  | 0.997,<br>0.1064,<br>0.0234,<br>0.0152  |
| MR-IVW             | 0.060,<br>-0.0262,<br>0.1298,<br>0.1256 | 0.057,<br>0.0239,<br>0.1298,<br>0.1256       | 0.071,<br>0.0439,<br>0.1298,<br>0.1256  | 0.086,<br>0.0640,<br>0.1298,<br>0.1256    | 0.107,<br>0.0740,<br>0.1298,<br>0.1256  | 0.125,<br>0.0840,<br>0.1298,<br>0.1256   | 0.152,<br>0.1040,<br>0.1298,<br>0.1256 | 0.185,<br>0.1240,<br>0.1298,<br>0.1256  | 0.293,<br>0.1741,<br>0.1298,<br>0.1256  |
| MR-IVW-Oracle      | 1.000,<br>-0.0989,<br>0.0148,<br>0.015  | 0.904,<br>-0.0493,<br>0.0149,<br>0.0152      | 0.460,<br>-0.0294,<br>0.0150,<br>0.0153 | 0.105,<br>-0.0096,<br>0.0151,<br>0.0154   | 0.047,<br>0.0004,<br>0.0151,<br>0.0154  | 0.094,<br>0.0103,<br>0.0152,<br>0.0155   | 0.508,<br>0.0301,<br>0.0153,<br>0.0156 | 0.879,<br>0.0500,<br>0.0154,<br>0.0157  | 1.000,<br>0.0996,<br>0.0158,<br>0.016   |
| MR-Egger           | 0.379,<br>0.5690,<br>0.4384,<br>0.3636  | 0.422,<br>0.6165,<br>0.4385,<br>0.3636       | 0.433,<br>0.6355,<br>0.4385,<br>0.3636  | 0.453,<br>0.6545,<br>0.4385,<br>0.3637    | 0.459,<br>0.6640,<br>0.4386,<br>0.3637  | 0.464,<br>0.6735,<br>0.4386,<br>0.3637   | 0.484,<br>0.6924,<br>0.4386,<br>0.3637 | 0.509,<br>0.7114,<br>0.4386,<br>0.3638  | 0.546,<br>0.7588,<br>0.4387,<br>0.3638  |
| MR-Weighted-Median | 0.995,<br>-1.1045,<br>0.0234,<br>0.0211 | 0.774,<br>-0.0593,<br>0.0237,<br>0.0214      | 0.497,<br>-0.0413,<br>0.0240,<br>0.0215 | 0.201,<br>-0.0232,<br>0.0244,<br>0.0216   | 0.123,<br>-0.0142,<br>0.0246,<br>0.0217 | 0.094,<br>-0.0052,<br>0.0249,<br>0.0218  | 0.130,<br>0.0127,<br>0.0253,<br>0.022  | 0.314,<br>0.0306,<br>0.0257,<br>0.0222  | 0.868,<br>0.0750,<br>0.0268,<br>0.0228  |
| MR-Weighted-Mode   | 0.841,<br>-0.1783,<br>0.1960,<br>0.2919 | 0.788,<br>-0.1372,<br>0.1972,<br>0.2913      | 0.748,<br>-0.1250,<br>0.2041,<br>0.2915 | 0.694,<br>-0.1086,<br>0.2036,<br>0.2919   | 0.664,<br>-0.0994,<br>0.2034,<br>0.2925 | 0.622,<br>-0.0908,<br>0.2032,<br>0.2926  | 0.550,<br>-0.0752,<br>0.2025,<br>0.293 | 0.448,<br>-0.0576,<br>0.2021,<br>0.2933 | 0.253,<br>-0.0176,<br>0.2026,<br>0.2941 |
| MR-RAPS1           | 0.053,<br>-0.0268,<br>0.1255,<br>0.1257 | 0.047,<br>0.0233,<br>0.1255,<br>0.1257       | 0.065,<br>0.0433,<br>0.1255,<br>0.1257  | 0.080,<br>0.0633,<br>0.1255,<br>0.1257    | 0.093,<br>0.0733,<br>0.1255,<br>0.1257  | 0.103,<br>0.0833,<br>0.1255,<br>0.1257   | 0.142,<br>0.1033,<br>0.1255,<br>0.1257 | 0.173,<br>0.1234,<br>0.1255,<br>0.1257  | 0.299,<br>0.1734,<br>0.1256,<br>0.1258  |
| MR-RAPS2           | 0.066,<br>-0.0402,<br>0.1394,<br>0.1356 | 0.053,<br>0.0098,<br>0.1394,<br>0.1356       | 0.062,<br>0.0298,<br>0.1394,<br>0.1356  | 0.074,<br>0.0498,<br>0.1394,<br>0.1356    | 0.084,<br>0.0598,<br>0.1394,<br>0.1356  | 0.095,<br>0.0698,<br>0.1394,<br>0.1356   | 0.110,<br>0.0898,<br>0.1394,<br>0.1356 | 0.140,<br>0.1094,<br>0.1390,<br>0.1356  | 0.218,<br>0.1593,<br>0.1391,<br>0.1356  |
| MR-RAPS3           | 0.892,<br>1.2454,<br>171.6271,<br>697.2 | 0.866,<br>209.9883,<br>6699.4141,<br>1249000 | 0.876,<br>21.2117,<br>534.7323,<br>6772 | 0.891,<br>-26.3794,<br>810.1790,<br>24370 | 0.900,<br>3.3468,<br>59.4460,<br>78.77  | 0.912,<br>-4.3093,<br>154.9911,<br>725.9 | 0.908,<br>0.0604,<br>40.8081,<br>40.55 | 0.911,<br>4.9292,<br>309.3501,<br>2518  | 0.945,<br>1.4952,<br>23.8250,<br>20.02  |
| MR-RAPS4           | 0.997,<br>0.3198,<br>17.8347,<br>9.695  | 0.995,<br>0.0360,<br>11.6924,<br>1.787       | 0.995,<br>1.4661,<br>15.7388,<br>1.647  | 0.986,<br>0.7936,<br>5.1224,<br>0.3005    | 0.981,<br>0.7884,<br>4.2352,<br>0.3116  | 0.984,<br>0.9206,<br>1.8818,<br>0.0714   | 0.999,<br>0.9950,<br>2.2961,<br>0.0696 | 0.998,<br>1.0811,<br>1.9398,<br>0.0668  | 0.999,<br>1.2547,<br>1.4721,<br>0.0698  |

Table S87: Main simulations: in each cell, from top to bottom are empirical type-I error/power, mean( $\hat{\theta}$ ), SD( $\hat{\theta}$ ), mean(SE( $\hat{\theta}$ )) when  $m = 100$ , the InSIDE violated,  $q = 0.6$ , and  $n = 100000$ .

| Methods \ $\theta$ | -0.1                                         | -0.05                                      | -0.03                                        | -0.01                                    | 0                                        | 0.01                                     | 0.03                                      | 0.05                                     | 0.1                                          |
|--------------------|----------------------------------------------|--------------------------------------------|----------------------------------------------|------------------------------------------|------------------------------------------|------------------------------------------|-------------------------------------------|------------------------------------------|----------------------------------------------|
| cML-MA-AIC         | 1.000,<br>-0.0958,<br>0.0151,<br>0.0127      | 0.892,<br>-0.0459,<br>0.0152,<br>0.0128    | 0.547,<br>-0.0263,<br>0.0147,<br>0.0128      | 0.115,<br>-0.0081,<br>0.0134,<br>0.0126  | 0.055,<br>0.0004,<br>0.0131,<br>0.0126   | 0.122,<br>0.0090,<br>0.0135,<br>0.0127   | 0.548,<br>0.0273,<br>0.0151,<br>0.013     | 0.890,<br>0.0470,<br>0.0157,<br>0.0132   | 1.000,<br>0.0966,<br>0.0159,<br>0.0135       |
| cML-MA-AIC-Profile | 1.000,<br>-0.0961,<br>0.0153,<br>0.0127      | 0.892,<br>-0.0460,<br>0.0153,<br>0.0128    | 0.544,<br>-0.0263,<br>0.0147,<br>0.0128      | 0.115,<br>-0.0080,<br>0.0134,<br>0.0127  | 0.054,<br>0.0004,<br>0.0131,<br>0.0127   | 0.121,<br>0.0090,<br>0.0135,<br>0.0127   | 0.545,<br>0.0273,<br>0.0151,<br>0.013     | 0.890,<br>0.0470,<br>0.0157,<br>0.0132   | 1.000,<br>0.0969,<br>0.0160,<br>0.0135       |
| cML-AIC            | 1.000,<br>-0.0978,<br>0.0158,<br>0.0112      | 0.939,<br>-0.0479,<br>0.0158,<br>0.0113    | 0.661,<br>-0.0282,<br>0.0156,<br>0.0114      | 0.207,<br>-0.0089,<br>0.0152,<br>0.0115  | 0.117,<br>0.0005,<br>0.0151,<br>0.0115   | 0.213,<br>0.0098,<br>0.0153,<br>0.0116   | 0.659,<br>0.0290,<br>0.0161,<br>0.0116    | 0.931,<br>0.0490,<br>0.0165,<br>0.0117   | 1.000,<br>0.0988,<br>0.0167,<br>0.012        |
| cML-AIC-Profile    | 1.000,<br>-0.0980,<br>0.0158,<br>0.0113      | 0.939,<br>-0.0480,<br>0.0159,<br>0.0114    | 0.660,<br>-0.0282,<br>0.0157,<br>0.0115      | 0.206,<br>-0.0089,<br>0.0152,<br>0.0115  | 0.114,<br>0.0004,<br>0.0151,<br>0.0116   | 0.212,<br>0.0098,<br>0.0153,<br>0.0116   | 0.657,<br>0.0290,<br>0.0161,<br>0.0117    | 0.930,<br>0.0490,<br>0.0165,<br>0.0118   | 1.000,<br>0.0990,<br>0.0168,<br>0.012        |
| cML-MA-BIC         | 1.000,<br>-0.0998,<br>0.0108,<br>0.0104      | 0.994,<br>-0.0497,<br>0.0109,<br>0.0105    | 0.797,<br>-0.0297,<br>0.0110,<br>0.0106      | 0.165,<br>-0.0097,<br>0.0110,<br>0.0106  | 0.057,<br>0.0003,<br>0.0111,<br>0.0107   | 0.168,<br>0.0103,<br>0.0111,<br>0.0107   | 0.783,<br>0.0303,<br>0.0112,<br>0.0108    | 0.994,<br>0.0503,<br>0.0113,<br>0.0109   | 1.000,<br>0.1003,<br>0.0116,<br>0.0111       |
| cML-MA-BIC-Profile | 1.000,<br>-0.0998,<br>0.0108,<br>0.0104      | 0.994,<br>-0.0497,<br>0.0109,<br>0.0105    | 0.797,<br>-0.0297,<br>0.0110,<br>0.0106      | 0.164,<br>-0.0097,<br>0.0110,<br>0.0107  | 0.057,<br>0.0003,<br>0.0111,<br>0.0107   | 0.168,<br>0.0103,<br>0.0111,<br>0.0107   | 0.781,<br>0.0303,<br>0.0112,<br>0.0108    | 0.994,<br>0.0503,<br>0.0113,<br>0.0109   | 1.000,<br>0.1003,<br>0.0116,<br>0.0111       |
| cML-BIC            | 1.000,<br>-0.0998,<br>0.0108,<br>0.0103      | 0.994,<br>-0.0498,<br>0.0109,<br>0.0104    | 0.799,<br>-0.0298,<br>0.0110,<br>0.0105      | 0.175,<br>-0.0098,<br>0.0110,<br>0.0106  | 0.058,<br>0.0002,<br>0.0111,<br>0.0106   | 0.174,<br>0.0102,<br>0.0111,<br>0.0106   | 0.785,<br>0.0303,<br>0.0112,<br>0.0107    | 0.994,<br>0.0503,<br>0.0113,<br>0.0108   | 1.000,<br>0.1003,<br>0.0116,<br>0.011        |
| cML-BIC-Profile    | 1.000,<br>-0.0998,<br>0.0108,<br>0.0103      | 0.994,<br>-0.0498,<br>0.0109,<br>0.0105    | 0.799,<br>-0.0298,<br>0.0110,<br>0.0105      | 0.174,<br>-0.0098,<br>0.0110,<br>0.0106  | 0.058,<br>0.0002,<br>0.0111,<br>0.0106   | 0.173,<br>0.0102,<br>0.0111,<br>0.0106   | 0.784,<br>0.0303,<br>0.0112,<br>0.0107    | 0.994,<br>0.0503,<br>0.0113,<br>0.0108   | 1.000,<br>0.1003,<br>0.0116,<br>0.011        |
| MR-Mix             | 1.000,<br>-0.0951,<br>0.0111,<br>0.0132      | 0.960,<br>-0.0470,<br>0.0111,<br>0.0131    | 0.583,<br>-0.0281,<br>0.0110,<br>0.0131      | 0.060,<br>-0.0093,<br>0.0112,<br>0.013   | 0.024,<br>0.0000,<br>0.0113,<br>0.013    | 0.071,<br>0.0092,<br>0.0112,<br>0.013    | 0.554,<br>0.0274,<br>0.0109,<br>0.013     | 0.959,<br>0.0453,<br>0.0112,<br>0.013    | 1.000,<br>0.0892,<br>0.0112,<br>0.013        |
| MR-ContMix         | 1.000,<br>-0.0994,<br>0.0110,<br>NA          | 0.994,<br>-0.0496,<br>0.0110,<br>NA        | 0.806,<br>-0.0296,<br>0.0111,<br>NA          | 0.173,<br>-0.0097,<br>0.0111,<br>NA      | 0.066,<br>0.0003,<br>0.0112,<br>NA       | 0.184,<br>0.0103,<br>0.0112,<br>NA       | 0.790,<br>0.0302,<br>0.0113,<br>NA        | 0.992,<br>0.0502,<br>0.0114,<br>NA       | 1.000,<br>0.1000,<br>0.0117,<br>NA           |
| MR-Lasso           | 1.000,<br>-0.0994,<br>0.0112,<br>0.0106      | 0.988,<br>-0.0495,<br>0.0113,<br>0.0107    | 0.781,<br>-0.0295,<br>0.0114,<br>0.0108      | 0.163,<br>-0.0097,<br>0.0114,<br>0.0108  | 0.060,<br>0.0003,<br>0.0114,<br>0.0109   | 0.163,<br>0.0102,<br>0.0114,<br>0.0109   | 0.763,<br>0.0301,<br>0.0115,<br>0.011     | 0.990,<br>0.0501,<br>0.0116,<br>0.011    | 1.000,<br>0.1000,<br>0.0120,<br>0.0113       |
| MR-PRESSO          | 0.933,<br>-0.0854,<br>0.0336,<br>0.0112      | 0.792,<br>-0.0364,<br>0.0310,<br>0.0112    | 0.632,<br>-0.0166,<br>0.0307,<br>0.0112      | 0.314,<br>0.0031,<br>0.0303,<br>0.0112   | 0.323,<br>0.0129,<br>0.0300,<br>0.0112   | 0.441,<br>0.0228,<br>0.0298,<br>0.0113   | 0.845,<br>0.0425,<br>0.0294,<br>0.0113    | 0.966,<br>0.0623,<br>0.0293,<br>0.0113   | 0.996,<br>0.1119,<br>0.0289,<br>0.0115       |
| MR-IVW             | 0.073,<br>-0.0242,<br>0.1347,<br>0.1257      | 0.076,<br>0.0260,<br>0.1347,<br>0.1257     | 0.087,<br>0.0461,<br>0.1347,<br>0.1257       | 0.106,<br>0.0662,<br>0.1347,<br>0.1257   | 0.121,<br>0.0762,<br>0.1347,<br>0.1257   | 0.131,<br>0.0863,<br>0.1347,<br>0.1257   | 0.163,<br>0.1064,<br>0.1347,<br>0.1257    | 0.188,<br>0.1264,<br>0.1347,<br>0.1257   | 0.289,<br>0.1766,<br>0.1347,<br>0.1257       |
| MR-IVW-Oracle      | 1.000,<br>-0.0994,<br>0.0107,<br>0.0107      | 0.994,<br>-0.0496,<br>0.0108,<br>0.0108    | 0.775,<br>-0.0296,<br>0.0109,<br>0.0109      | 0.152,<br>-0.0097,<br>0.0110,<br>0.0109  | 0.047,<br>0.0003,<br>0.0110,<br>0.011    | 0.154,<br>0.0102,<br>0.0110,<br>0.011    | 0.767,<br>0.0302,<br>0.0111,<br>0.0111    | 0.991,<br>0.0501,<br>0.0112,<br>0.0112   | 1.000,<br>0.1000,<br>0.0115,<br>0.0114       |
| MR-Egger           | 0.389,<br>0.5783,<br>0.4525,<br>0.3677       | 0.426,<br>0.6271,<br>0.4525,<br>0.3678     | 0.438,<br>0.6467,<br>0.4524,<br>0.3678       | 0.463,<br>0.6662,<br>0.4524,<br>0.3678   | 0.470,<br>0.6759,<br>0.4524,<br>0.3678   | 0.488,<br>0.6857,<br>0.4524,<br>0.3678   | 0.501,<br>0.7052,<br>0.4524,<br>0.3678    | 0.516,<br>0.7247,<br>0.4524,<br>0.3678   | 0.519,<br>0.7734,<br>0.4523,<br>0.3679       |
| MR-Weighted-Median | 1.000,<br>-0.1042,<br>0.0182,<br>0.015       | 0.930,<br>-0.0574,<br>0.0186,<br>0.0152    | 0.699,<br>-0.0386,<br>0.0188,<br>0.0153      | 0.302,<br>-0.0199,<br>0.0191,<br>0.0154  | 0.167,<br>-0.0105,<br>0.0192,<br>0.0154  | 0.125,<br>-0.0011,<br>0.0194,<br>0.0155  | 0.248,<br>0.0175,<br>0.0197,<br>0.0156    | 0.621,<br>0.0361,<br>0.0200,<br>0.0158   | 0.993,<br>0.0827,<br>0.0207,<br>0.0162       |
| MR-Weighted-Mode   | 0.914,<br>-0.1861,<br>0.2148,<br>0.1606      | 0.868,<br>-0.1449,<br>0.2143,<br>0.1607    | 0.840,<br>-0.1278,<br>0.2145,<br>0.1602      | 0.804,<br>-0.1111,<br>0.2145,<br>0.1606  | 0.776,<br>-0.1027,<br>0.2143,<br>0.1607  | 0.733,<br>-0.0937,<br>0.2144,<br>0.1609  | 0.660,<br>-0.0775,<br>0.2144,<br>0.1609   | 0.572,<br>-0.0615,<br>0.2148,<br>0.1611  | 0.385,<br>-0.0194,<br>0.2149,<br>0.1617      |
| MR-RAPS1           | 0.066,<br>-0.0237,<br>0.1311,<br>0.1253      | 0.068,<br>0.0263,<br>0.1311,<br>0.1253     | 0.086,<br>0.0463,<br>0.1311,<br>0.1253       | 0.098,<br>0.0663,<br>0.1311,<br>0.1253   | 0.108,<br>0.0763,<br>0.1311,<br>0.1253   | 0.120,<br>0.0863,<br>0.1311,<br>0.1253   | 0.153,<br>0.1063,<br>0.1311,<br>0.1253    | 0.184,<br>0.1263,<br>0.1311,<br>0.1253   | 0.300,<br>0.1763,<br>0.1311,<br>0.1253       |
| MR-RAPS2           | 0.079,<br>-0.0369,<br>0.1455,<br>0.1352      | 0.071,<br>0.0126,<br>0.1446,<br>0.1351     | 0.078,<br>0.0332,<br>0.1455,<br>0.1352       | 0.091,<br>0.0532,<br>0.1455,<br>0.1352   | 0.096,<br>0.0632,<br>0.1455,<br>0.1352   | 0.113,<br>0.0732,<br>0.1455,<br>0.1352   | 0.128,<br>0.0932,<br>0.1455,<br>0.1352    | 0.157,<br>0.1132,<br>0.1455,<br>0.1352   | 0.240,<br>0.1632,<br>0.1455,<br>0.1352       |
| MR-RAPS3           | 0.917,<br>25.1174,<br>805.4906,<br>8805.7142 | 0.919,<br>2.3288,<br>179.6817,<br>550.0199 | 0.918,<br>23.8104,<br>546.1389,<br>5379.2702 | 0.924,<br>0.9100,<br>40.5061,<br>29.0598 | 0.922,<br>3.1148,<br>37.4361,<br>25.0112 | 0.921,<br>0.6864,<br>41.8040,<br>34.2991 | 0.930,<br>-0.1778,<br>53.2802,<br>71.1757 | 0.939,<br>5.7914,<br>65.8989,<br>80.7173 | 0.956,<br>-5.6541,<br>236.2347,<br>1300.2416 |
| MR-RAPS4           | 0.998,<br>-0.2801,<br>16.3670,<br>1.0631     | 0.997,<br>0.5836,<br>8.2056,<br>0.7236     | 0.996,<br>0.7451,<br>13.5943,<br>2.2242      | 0.996,<br>0.7734,<br>2.1873,<br>0.0414   | 0.989,<br>0.8248,<br>2.1544,<br>0.0475   | 0.989,<br>0.8971,<br>2.0181,<br>0.0423   | 0.999,<br>0.9619,<br>2.2797,<br>0.0698    | 1.000,<br>1.0511,<br>1.7062,<br>0.031    | 1.000,<br>1.1992,<br>1.5983,<br>0.0298       |

Table S88: Main simulations: in each cell, from top to bottom are empirical type-I error/power, mean( $\hat{\theta}$ ), SD( $\hat{\theta}$ ), mean(SE( $\hat{\theta}$ )) when  $m = 100$ , the InSIDE violated,  $q = 0.6$ , and  $n = 200000$ .

| Methods \ $\theta$ | -0.1                                        | -0.05                                     | -0.03                                       | -0.01                                    | 0                                           | 0.01                                         | 0.03                                       | 0.05                                     | 0.1                                     |
|--------------------|---------------------------------------------|-------------------------------------------|---------------------------------------------|------------------------------------------|---------------------------------------------|----------------------------------------------|--------------------------------------------|------------------------------------------|-----------------------------------------|
| cML-MA-AIC         | 1.000,<br>-0.0977,<br>0.0104,<br>0.0089     | 0.996,<br>-0.0479,<br>0.0106,<br>0.009    | 0.827,<br>-0.0281,<br>0.0105,<br>0.0091     | 0.205,<br>-0.0090,<br>0.0097,<br>0.0089  | 0.056,<br>-0.0004,<br>0.0093,<br>0.0089     | 0.178,<br>0.0083,<br>0.0097,<br>0.009        | 0.797,<br>0.0272,<br>0.0107,<br>0.0092     | 0.990,<br>0.0471,<br>0.0109,<br>0.0093   | 1.000,<br>0.0969,<br>0.0110,<br>0.0095  |
| cML-MA-AIC-Profile | 1.000,<br>-0.0979,<br>0.0105,<br>0.009      | 0.996,<br>-0.0480,<br>0.0106,<br>0.009    | 0.826,<br>-0.0281,<br>0.0105,<br>0.0091     | 0.201,<br>-0.0090,<br>0.0097,<br>0.009   | 0.056,<br>-0.0003,<br>0.0093,<br>0.0089     | 0.177,<br>0.0083,<br>0.0097,<br>0.009        | 0.796,<br>0.0272,<br>0.0107,<br>0.0092     | 0.990,<br>0.0471,<br>0.0109,<br>0.0093   | 1.000,<br>0.0970,<br>0.0111,<br>0.0095  |
| cML-AIC            | 1.000,<br>-0.0990,<br>0.0110,<br>0.0079     | 0.996,<br>-0.0492,<br>0.0112,<br>0.008    | 0.883,<br>-0.0292,<br>0.0112,<br>0.0081     | 0.286,<br>-0.0096,<br>0.0108,<br>0.0081  | 0.116,<br>-0.0003,<br>0.0107,<br>0.0081     | 0.275,<br>0.0089,<br>0.0111,<br>0.0082       | 0.859,<br>0.0284,<br>0.0114,<br>0.0082     | 0.993,<br>0.0484,<br>0.0115,<br>0.0083   | 1.000,<br>0.0982,<br>0.0117,<br>0.0085  |
| cML-AIC-Profile    | 1.000,<br>-0.0991,<br>0.0110,<br>0.008      | 0.996,<br>-0.0492,<br>0.0112,<br>0.008    | 0.882,<br>-0.0293,<br>0.0112,<br>0.0081     | 0.286,<br>-0.0096,<br>0.0108,<br>0.0081  | 0.116,<br>-0.0003,<br>0.0107,<br>0.0082     | 0.274,<br>0.0089,<br>0.0111,<br>0.0082       | 0.858,<br>0.0284,<br>0.0114,<br>0.0082     | 0.993,<br>0.0484,<br>0.0115,<br>0.0083   | 1.000,<br>0.0983,<br>0.0117,<br>0.0085  |
| cML-MA-BIC         | 1.000,<br>-0.1004,<br>0.0072,<br>0.0073     | 1.000,<br>-0.0504,<br>0.0073,<br>0.0074   | 0.982,<br>-0.0304,<br>0.0073,<br>0.0075     | 0.292,<br>-0.0104,<br>0.0074,<br>0.0075  | 0.043,<br>-0.0005,<br>0.0074,<br>0.0075     | 0.234,<br>0.0095,<br>0.0074,<br>0.0076       | 0.978,<br>0.0295,<br>0.0075,<br>0.0076     | 1.000,<br>0.0495,<br>0.0075,<br>0.0077   | 1.000,<br>0.0995,<br>0.0077,<br>0.0078  |
| cML-MA-BIC-Profile | 1.000,<br>-0.1004,<br>0.0072,<br>0.0073     | 1.000,<br>-0.0504,<br>0.0073,<br>0.0074   | 0.982,<br>-0.0304,<br>0.0073,<br>0.0075     | 0.290,<br>-0.0104,<br>0.0074,<br>0.0075  | 0.043,<br>-0.0005,<br>0.0074,<br>0.0075     | 0.233,<br>0.0095,<br>0.0074,<br>0.0076       | 0.978,<br>0.0295,<br>0.0075,<br>0.0076     | 1.000,<br>0.0495,<br>0.0075,<br>0.0077   | 1.000,<br>0.0995,<br>0.0077,<br>0.0078  |
| cML-BIC            | 1.000,<br>-0.1004,<br>0.0072,<br>0.0073     | 1.000,<br>-0.0504,<br>0.0073,<br>0.0074   | 0.981,<br>-0.0304,<br>0.0073,<br>0.0074     | 0.301,<br>-0.0105,<br>0.0074,<br>0.0074  | 0.046,<br>-0.0005,<br>0.0074,<br>0.0075     | 0.239,<br>0.0095,<br>0.0074,<br>0.0075       | 0.977,<br>0.0295,<br>0.0075,<br>0.0076     | 1.000,<br>0.0495,<br>0.0075,<br>0.0076   | 1.000,<br>0.0995,<br>0.0077,<br>0.0078  |
| cML-BIC-Profile    | 1.000,<br>-0.1004,<br>0.0072,<br>0.0073     | 1.000,<br>-0.0504,<br>0.0073,<br>0.0074   | 0.981,<br>-0.0304,<br>0.0073,<br>0.0074     | 0.300,<br>-0.0105,<br>0.0074,<br>0.0075  | 0.046,<br>-0.0005,<br>0.0074,<br>0.0075     | 0.238,<br>0.0095,<br>0.0074,<br>0.0075       | 0.976,<br>0.0295,<br>0.0075,<br>0.0076     | 1.000,<br>0.0495,<br>0.0075,<br>0.0076   | 1.000,<br>0.0995,<br>0.0077,<br>0.0078  |
| MR-Mix             | 1.000,<br>-0.0957,<br>0.0084,<br>0.0102     | 0.995,<br>-0.0474,<br>0.0081,<br>0.0102   | 0.880,<br>-0.0285,<br>0.0081,<br>0.0102     | 0.188,<br>-0.0098,<br>0.0081,<br>0.0101  | 0.038,<br>-0.0007,<br>0.0081,<br>0.0101     | 0.148,<br>0.0085,<br>0.0081,<br>0.0101       | 0.838,<br>0.0269,<br>0.0081,<br>0.01       | 0.994,<br>0.0451,<br>0.0083,<br>0.01     | 1.000,<br>0.0885,<br>0.0083,<br>0.01    |
| MR-ContMix         | 1.000,<br>-0.1002,<br>0.0073,<br>NA         | 1.000,<br>-0.0504,<br>0.0074,<br>NA       | 0.981,<br>-0.0304,<br>0.0075,<br>NA         | 0.325,<br>-0.0105,<br>0.0075,<br>NA      | 0.049,<br>-0.0005,<br>0.0075,<br>NA         | 0.245,<br>0.0095,<br>0.0075,<br>NA           | 0.979,<br>0.0294,<br>0.0076,<br>NA         | 1.000,<br>0.0494,<br>0.0077,<br>NA       | 1.000,<br>0.0992,<br>0.0078,<br>NA      |
| MR-Lasso           | 1.000,<br>-0.1002,<br>0.0075,<br>0.0075     | 1.000,<br>-0.0503,<br>0.0075,<br>0.0076   | 0.973,<br>-0.0304,<br>0.0076,<br>0.0076     | 0.280,<br>-0.0104,<br>0.0076,<br>0.0077  | 0.043,<br>-0.0004,<br>0.0077,<br>0.0077     | 0.228,<br>0.0095,<br>0.0077,<br>0.0077       | 0.966,<br>0.0295,<br>0.0077,<br>0.0078     | 1.000,<br>0.0494,<br>0.0078,<br>0.0078   | 1.000,<br>0.0994,<br>0.0080,<br>0.008   |
| MR-PRESSO          | 0.897,<br>-0.0709,<br>0.0746,<br>0.0138     | 0.763,<br>-0.0225,<br>0.0719,<br>0.0131   | 0.683,<br>-0.0027,<br>0.0718,<br>0.0131     | 0.444,<br>0.0166,<br>0.0704,<br>0.013    | 0.436,<br>0.0265,<br>0.0704,<br>0.013       | 0.587,<br>0.0365,<br>0.0705,<br>0.013        | 0.929,<br>0.0556,<br>0.0685,<br>0.0127     | 0.958,<br>0.0750,<br>0.0677,<br>0.0125   | 0.981,<br>0.1225,<br>0.0611,<br>0.0119  |
| MR-IVW             | 0.070,<br>-0.0162,<br>0.1297,<br>0.1257     | 0.069,<br>0.0341,<br>0.1297,<br>0.1257    | 0.083,<br>0.0542,<br>0.1297,<br>0.1257      | 0.102,<br>0.0743,<br>0.1297,<br>0.1257   | 0.112,<br>0.0844,<br>0.1297,<br>0.1257      | 0.124,<br>0.0944,<br>0.1297,<br>0.1257       | 0.168,<br>0.1145,<br>0.1297,<br>0.1257     | 0.202,<br>0.1346,<br>0.1297,<br>0.1257   | 0.319,<br>0.1848,<br>0.1297,<br>0.1256  |
| MR-IVW-Oracle      | 1.000,<br>-0.1002,<br>0.0072,<br>0.0076     | 1.000,<br>-0.0503,<br>0.0073,<br>0.0077   | 0.976,<br>-0.0304,<br>0.0073,<br>0.0077     | 0.265,<br>-0.0104,<br>0.0073,<br>0.0078  | 0.035,<br>-0.0004,<br>0.0074,<br>0.0078     | 0.218,<br>0.0095,<br>0.0074,<br>0.0078       | 0.969,<br>0.0295,<br>0.0074,<br>0.0079     | 1.000,<br>0.0494,<br>0.0075,<br>0.0079   | 1.000,<br>0.0993,<br>0.0077,<br>0.0081  |
| MR-Egger           | 0.408,<br>0.6105,<br>0.4612,<br>0.37        | 0.443,<br>0.6600,<br>0.4612,<br>0.37      | 0.460,<br>0.6798,<br>0.4612,<br>0.37        | 0.471,<br>0.6996,<br>0.4612,<br>0.37     | 0.481,<br>0.7095,<br>0.4612,<br>0.37        | 0.493,<br>0.7194,<br>0.4612,<br>0.37         | 0.499,<br>0.7392,<br>0.4612,<br>0.3701     | 0.525,<br>0.7589,<br>0.4612,<br>0.3701   | 0.565,<br>0.8083,<br>0.4611,<br>0.3701  |
| MR-Weighted-Median | 1.000,<br>-0.1032,<br>0.0117,<br>0.0106     | 0.996,<br>-0.0553,<br>0.0119,<br>0.0107   | 0.903,<br>-0.0361,<br>0.0121,<br>0.0108     | 0.350,<br>-0.0170,<br>0.0123,<br>0.0108  | 0.136,<br>-0.0075,<br>0.0124,<br>0.0109     | 0.088,<br>0.0021,<br>0.0124,<br>0.0109       | 0.504,<br>0.0211,<br>0.0126,<br>0.011      | 0.916,<br>0.0402,<br>0.0128,<br>0.0111   | 0.999,<br>0.0878,<br>0.0135,<br>0.0114  |
| MR-Weighted-Mode   | 0.945,<br>-0.1606,<br>0.3591,<br>0.1746     | 0.913,<br>-0.1179,<br>0.3586,<br>0.1865   | 0.887,<br>-0.0995,<br>0.3583,<br>0.1764     | 0.858,<br>-0.0838,<br>0.3581,<br>0.1804  | 0.829,<br>-0.0766,<br>0.3580,<br>0.1781     | 0.802,<br>-0.0686,<br>0.3579,<br>0.1702      | 0.708,<br>-0.0535,<br>0.3565,<br>0.1689    | 0.625,<br>-0.0362,<br>0.3564,<br>0.1731  | 0.436,<br>0.0047,<br>0.3562,<br>0.1647  |
| MR-RAPS1           | 0.060,<br>-0.0170,<br>0.1265,<br>0.125      | 0.057,<br>0.0330,<br>0.1264,<br>0.125     | 0.073,<br>0.0530,<br>0.1264,<br>0.125       | 0.094,<br>0.0730,<br>0.1264,<br>0.125    | 0.103,<br>0.0830,<br>0.1264,<br>0.125       | 0.118,<br>0.0930,<br>0.1264,<br>0.125        | 0.162,<br>0.1130,<br>0.1264,<br>0.125      | 0.202,<br>0.1329,<br>0.1264,<br>0.125    | 0.310,<br>0.1829,<br>0.1264,<br>0.125   |
| MR-RAPS2           | 0.106,<br>-0.0399,<br>0.1520,<br>0.1311     | 0.085,<br>0.0155,<br>0.1582,<br>0.1325    | 0.085,<br>0.0356,<br>0.1477,<br>0.1332      | 0.100,<br>0.0556,<br>0.1495,<br>0.1332   | 0.106,<br>0.0693,<br>0.1541,<br>0.1336      | 0.110,<br>0.0776,<br>0.1418,<br>0.1342       | 0.136,<br>0.0996,<br>0.1484,<br>0.1342     | 0.173,<br>0.1186,<br>0.1481,<br>0.134    | 0.261,<br>0.1703,<br>0.1479,<br>0.1345  |
| MR-RAPS3           | 0.931,<br>-4.3662,<br>120.3558,<br>148.8028 | 0.943,<br>-0.8313,<br>72.0796,<br>59.7488 | 0.937,<br>-0.3019,<br>214.2086,<br>491.0617 | 0.945,<br>2.1165,<br>47.2097,<br>27.6602 | 0.948,<br>-0.6127,<br>103.8212,<br>126.1302 | 0.950,<br>10.8055,<br>349.7168,<br>1383.0164 | 0.956,<br>3.4670,<br>134.0669,<br>228.6325 | 0.958,<br>1.4311,<br>35.1436,<br>15.5759 | 0.984,<br>3.0832,<br>17.7638,<br>5.1696 |
| MR-RAPS4           | 1.000,<br>0.3480,<br>2.6821,<br>0.0441      | 0.999,<br>0.7353,<br>2.1236,<br>0.0389    | 0.999,<br>0.6685,<br>2.4392,<br>0.068       | 0.999,<br>0.8426,<br>3.0054,<br>0.0636   | 0.990,<br>0.9712,<br>2.6826,<br>0.0492      | 0.997,<br>0.9250,<br>2.1687,<br>0.0401       | 0.999,<br>0.9291,<br>2.2197,<br>0.0372     | 0.999,<br>1.0774,<br>1.7498,<br>0.0362   | 1.000,<br>1.1822,<br>2.6545,<br>0.0505  |

Table S89: Main simulations: the relative frequencies of cML-BIC selecting  $\hat{K} = K_0$  for  $m = 10$  and the InSIDE satisfied.

| $\theta$ | $q = 0$ |          |          | $q = 0.2$ |          |          | $q = 0.4$ |          |          | $q = 0.6$ |          |          |
|----------|---------|----------|----------|-----------|----------|----------|-----------|----------|----------|-----------|----------|----------|
|          | n = 50k | n = 100k | n = 200k | n = 50k   | n = 100k | n = 200k | n = 50k   | n = 100k | n = 200k | n = 50k   | n = 100k | n = 200k |
| -0.1     | 0.992   | 0.998    | 0.996    | 0.994     | 0.996    | 0.998    | 0.996     | 0.997    | 0.998    | 0.997     | 1.000    | 0.999    |
| -0.05    | 0.989   | 0.997    | 0.996    | 0.994     | 0.997    | 0.998    | 0.994     | 0.996    | 0.997    | 0.997     | 0.998    | 0.998    |
| -0.03    | 0.988   | 0.997    | 0.996    | 0.994     | 0.997    | 0.998    | 0.994     | 0.996    | 0.997    | 0.998     | 0.998    | 0.998    |
| -0.01    | 0.989   | 0.995    | 0.996    | 0.994     | 0.997    | 0.998    | 0.994     | 0.996    | 0.997    | 0.998     | 0.998    | 0.998    |
| 0        | 0.989   | 0.995    | 0.996    | 0.994     | 0.996    | 0.998    | 0.994     | 0.996    | 0.997    | 0.998     | 0.997    | 0.998    |
| 0.01     | 0.989   | 0.995    | 0.996    | 0.994     | 0.996    | 0.998    | 0.994     | 0.996    | 0.997    | 0.998     | 0.997    | 0.998    |
| 0.03     | 0.987   | 0.994    | 0.996    | 0.994     | 0.995    | 0.998    | 0.994     | 0.996    | 0.996    | 0.997     | 0.998    | 0.998    |
| 0.05     | 0.987   | 0.994    | 0.996    | 0.994     | 0.995    | 0.997    | 0.994     | 0.996    | 0.996    | 0.996     | 0.998    | 0.998    |
| 0.1      | 0.988   | 0.993    | 0.995    | 0.993     | 0.995    | 0.997    | 0.994     | 0.996    | 0.996    | 0.997     | 0.998    | 0.998    |

Table S90: Main simulations: the relative frequencies of cML-BIC selecting  $\hat{K} = K_0$  for  $m = 10$  and the InSIDE violated.

| $\theta$ | $q = 0$ |          |          | $q = 0.2$ |          |          | $q = 0.4$ |          |          | $q = 0.6$ |          |          |
|----------|---------|----------|----------|-----------|----------|----------|-----------|----------|----------|-----------|----------|----------|
|          | n = 50k | n = 100k | n = 200k | n = 50k   | n = 100k | n = 200k | n = 50k   | n = 100k | n = 200k | n = 50k   | n = 100k | n = 200k |
| -0.1     | 0.992   | 0.998    | 0.996    | 0.991     | 0.994    | 0.996    | 0.997     | 0.998    | 0.998    | 0.995     | 0.998    | 0.999    |
| -0.05    | 0.989   | 0.997    | 0.996    | 0.994     | 0.994    | 0.996    | 0.996     | 0.997    | 0.998    | 0.995     | 0.999    | 0.999    |
| -0.03    | 0.988   | 0.997    | 0.996    | 0.993     | 0.995    | 0.996    | 0.995     | 0.996    | 0.999    | 0.996     | 0.999    | 0.998    |
| -0.01    | 0.989   | 0.995    | 0.996    | 0.992     | 0.994    | 0.996    | 0.997     | 0.996    | 0.999    | 0.996     | 0.999    | 0.999    |
| 0        | 0.989   | 0.995    | 0.996    | 0.992     | 0.994    | 0.996    | 0.996     | 0.995    | 0.999    | 0.996     | 0.999    | 0.999    |
| 0.01     | 0.989   | 0.995    | 0.996    | 0.992     | 0.994    | 0.996    | 0.996     | 0.995    | 0.998    | 0.996     | 0.999    | 0.999    |
| 0.03     | 0.987   | 0.994    | 0.996    | 0.992     | 0.995    | 0.996    | 0.996     | 0.995    | 0.999    | 0.996     | 0.999    | 0.999    |
| 0.05     | 0.987   | 0.994    | 0.996    | 0.992     | 0.995    | 0.996    | 0.996     | 0.996    | 0.999    | 0.998     | 0.999    | 0.999    |
| 0.1      | 0.988   | 0.993    | 0.995    | 0.993     | 0.994    | 0.996    | 0.998     | 0.995    | 0.997    | 0.998     | 0.999    | 0.999    |

Table S91: Main simulations: the relative frequencies of cML-BIC selecting  $\hat{K} = K_0$  for  $m = 20$  and the InSIDE satisfied.

| $\theta$ | $q = 0$ |          |          | $q = 0.2$ |          |          | $q = 0.4$ |          |          | $q = 0.6$ |          |          |
|----------|---------|----------|----------|-----------|----------|----------|-----------|----------|----------|-----------|----------|----------|
|          | n = 50k | n = 100k | n = 200k | n = 50k   | n = 100k | n = 200k | n = 50k   | n = 100k | n = 200k | n = 50k   | n = 100k | n = 200k |
| -0.1     | 0.980   | 0.985    | 0.993    | 0.979     | 0.990    | 0.992    | 0.989     | 0.994    | 0.994    | 0.991     | 0.995    | 0.997    |
| -0.05    | 0.983   | 0.987    | 0.994    | 0.981     | 0.988    | 0.995    | 0.989     | 0.992    | 0.995    | 0.992     | 0.994    | 0.998    |
| -0.03    | 0.986   | 0.989    | 0.994    | 0.979     | 0.988    | 0.995    | 0.987     | 0.993    | 0.995    | 0.992     | 0.994    | 0.998    |
| -0.01    | 0.987   | 0.988    | 0.994    | 0.982     | 0.988    | 0.995    | 0.987     | 0.993    | 0.995    | 0.993     | 0.995    | 0.997    |
| 0        | 0.987   | 0.989    | 0.994    | 0.983     | 0.988    | 0.995    | 0.987     | 0.993    | 0.995    | 0.993     | 0.995    | 0.997    |
| 0.01     | 0.987   | 0.990    | 0.994    | 0.983     | 0.987    | 0.995    | 0.987     | 0.994    | 0.995    | 0.992     | 0.995    | 0.997    |
| 0.03     | 0.987   | 0.990    | 0.993    | 0.982     | 0.987    | 0.996    | 0.986     | 0.995    | 0.993    | 0.993     | 0.995    | 0.997    |
| 0.05     | 0.988   | 0.989    | 0.993    | 0.983     | 0.987    | 0.996    | 0.987     | 0.995    | 0.993    | 0.992     | 0.995    | 0.998    |
| 0.1      | 0.987   | 0.990    | 0.992    | 0.982     | 0.989    | 0.996    | 0.986     | 0.996    | 0.992    | 0.992     | 0.996    | 0.996    |

Table S92: Main simulations: the relative frequencies of cML-BIC selecting  $\hat{K} = K_0$  for  $m = 20$  and the InSIDE violated.

| $\theta$ | $q = 0$ |          |          | $q = 0.2$ |          |          | $q = 0.4$ |          |          | $q = 0.6$ |          |          |
|----------|---------|----------|----------|-----------|----------|----------|-----------|----------|----------|-----------|----------|----------|
|          | n = 50k | n = 100k | n = 200k | n = 50k   | n = 100k | n = 200k | n = 50k   | n = 100k | n = 200k | n = 50k   | n = 100k | n = 200k |
| -0.1     | 0.980   | 0.985    | 0.993    | 0.990     | 0.993    | 0.989    | 0.995     | 0.998    | 0.996    | 0.988     | 0.995    | 0.997    |
| -0.05    | 0.983   | 0.987    | 0.994    | 0.988     | 0.993    | 0.989    | 0.993     | 0.995    | 0.994    | 0.984     | 0.995    | 0.997    |
| -0.03    | 0.986   | 0.989    | 0.994    | 0.988     | 0.991    | 0.989    | 0.993     | 0.994    | 0.995    | 0.984     | 0.994    | 0.997    |
| -0.01    | 0.987   | 0.988    | 0.994    | 0.987     | 0.991    | 0.989    | 0.993     | 0.994    | 0.994    | 0.984     | 0.995    | 0.997    |
| 0        | 0.987   | 0.989    | 0.994    | 0.986     | 0.990    | 0.989    | 0.992     | 0.993    | 0.994    | 0.985     | 0.995    | 0.998    |
| 0.01     | 0.987   | 0.990    | 0.994    | 0.986     | 0.990    | 0.989    | 0.991     | 0.993    | 0.994    | 0.985     | 0.995    | 0.998    |
| 0.03     | 0.987   | 0.990    | 0.993    | 0.987     | 0.990    | 0.989    | 0.992     | 0.993    | 0.994    | 0.986     | 0.995    | 0.998    |
| 0.05     | 0.988   | 0.989    | 0.993    | 0.986     | 0.990    | 0.989    | 0.994     | 0.992    | 0.994    | 0.985     | 0.995    | 0.998    |
| 0.1      | 0.987   | 0.990    | 0.992    | 0.986     | 0.990    | 0.990    | 0.992     | 0.988    | 0.993    | 0.986     | 0.996    | 0.998    |

Table S93: Main simulations: the relative frequencies of cML-BIC selecting  $\hat{K} = K_0$  for  $m = 100$  and the InSIDE satisfied.

| $\theta$ | $q = 0$ |          |          | $q = 0.2$ |          |          | $q = 0.4$ |          |          | $q = 0.6$ |          |          |
|----------|---------|----------|----------|-----------|----------|----------|-----------|----------|----------|-----------|----------|----------|
|          | n = 50k | n = 100k | n = 200k | n = 50k   | n = 100k | n = 200k | n = 50k   | n = 100k | n = 200k | n = 50k   | n = 100k | n = 200k |
| -0.1     | 0.897   | 0.928    | 0.958    | 0.931     | 0.945    | 0.957    | 0.945     | 0.957    | 0.974    | 0.963     | 0.965    | 0.988    |
| -0.05    | 0.906   | 0.937    | 0.957    | 0.936     | 0.944    | 0.955    | 0.942     | 0.964    | 0.975    | 0.963     | 0.973    | 0.989    |
| -0.03    | 0.906   | 0.936    | 0.956    | 0.936     | 0.945    | 0.958    | 0.939     | 0.967    | 0.974    | 0.964     | 0.973    | 0.988    |
| -0.01    | 0.903   | 0.935    | 0.950    | 0.940     | 0.945    | 0.957    | 0.938     | 0.964    | 0.976    | 0.963     | 0.971    | 0.988    |
| 0        | 0.903   | 0.937    | 0.949    | 0.942     | 0.947    | 0.957    | 0.940     | 0.964    | 0.976    | 0.964     | 0.970    | 0.986    |
| 0.01     | 0.908   | 0.939    | 0.950    | 0.940     | 0.945    | 0.957    | 0.940     | 0.964    | 0.976    | 0.964     | 0.971    | 0.986    |
| 0.03     | 0.909   | 0.937    | 0.952    | 0.942     | 0.945    | 0.956    | 0.942     | 0.965    | 0.977    | 0.963     | 0.971    | 0.986    |
| 0.05     | 0.913   | 0.932    | 0.952    | 0.941     | 0.950    | 0.956    | 0.940     | 0.963    | 0.978    | 0.961     | 0.970    | 0.986    |
| 0.1      | 0.912   | 0.928    | 0.955    | 0.943     | 0.947    | 0.961    | 0.941     | 0.969    | 0.975    | 0.963     | 0.970    | 0.984    |

Table S94: Main simulations: the relative frequencies of cML-BIC selecting  $\hat{K} = K_0$  for  $m = 100$  and the InSIDE violated.

| $\theta$ | $q = 0$ |          |          | $q = 0.2$ |          |          | $q = 0.4$ |          |          | $q = 0.6$ |          |          |
|----------|---------|----------|----------|-----------|----------|----------|-----------|----------|----------|-----------|----------|----------|
|          | n = 50k | n = 100k | n = 200k | n = 50k   | n = 100k | n = 200k | n = 50k   | n = 100k | n = 200k | n = 50k   | n = 100k | n = 200k |
| -0.1     | 0.897   | 0.928    | 0.958    | 0.930     | 0.946    | 0.961    | 0.943     | 0.948    | 0.965    | 0.971     | 0.975    | 0.987    |
| -0.05    | 0.906   | 0.937    | 0.957    | 0.916     | 0.944    | 0.967    | 0.946     | 0.952    | 0.971    | 0.968     | 0.975    | 0.988    |
| -0.03    | 0.906   | 0.936    | 0.956    | 0.915     | 0.951    | 0.966    | 0.948     | 0.951    | 0.973    | 0.965     | 0.976    | 0.986    |
| -0.01    | 0.903   | 0.935    | 0.950    | 0.913     | 0.951    | 0.966    | 0.947     | 0.952    | 0.971    | 0.965     | 0.976    | 0.985    |
| 0        | 0.903   | 0.937    | 0.949    | 0.914     | 0.951    | 0.967    | 0.949     | 0.953    | 0.972    | 0.965     | 0.977    | 0.985    |
| 0.01     | 0.908   | 0.939    | 0.950    | 0.913     | 0.951    | 0.966    | 0.952     | 0.952    | 0.972    | 0.966     | 0.978    | 0.985    |
| 0.03     | 0.909   | 0.937    | 0.952    | 0.915     | 0.954    | 0.966    | 0.949     | 0.952    | 0.973    | 0.964     | 0.978    | 0.985    |
| 0.05     | 0.913   | 0.932    | 0.952    | 0.917     | 0.955    | 0.963    | 0.949     | 0.955    | 0.972    | 0.962     | 0.978    | 0.985    |
| 0.1      | 0.912   | 0.928    | 0.955    | 0.912     | 0.951    | 0.962    | 0.947     | 0.956    | 0.974    | 0.958     | 0.978    | 0.984    |

Table S95: Comparison of cML-MA-BIC and cML-BIC with cML-MA-BIC-DP and cML-BIC-DP: in each cell, from top to bottom are empirical type-I error/power, mean( $\hat{\theta}$ ), SD( $\hat{\theta}$ ), mean(SE( $\hat{\theta}$ )) when  $m = 10$ , the InSIDE violated,  $q = 0.6$ ,  $n = 50000$ .

| Methods \ $\theta$     | -0.1                                    | -0.05                                   | -0.03                                   | -0.01                                   | 0                                       | 0.01                                   | 0.03                                   | 0.05                                   | 0.1                                    |
|------------------------|-----------------------------------------|-----------------------------------------|-----------------------------------------|-----------------------------------------|-----------------------------------------|----------------------------------------|----------------------------------------|----------------------------------------|----------------------------------------|
| cML-MA-BIC             | 0.768,<br>-0.1008,<br>0.0372,<br>0.0379 | 0.259,<br>-0.0506,<br>0.0377,<br>0.0386 | 0.124,<br>-0.0307,<br>0.0379,<br>0.0389 | 0.055,<br>-0.0107,<br>0.0382,<br>0.0392 | 0.044,<br>-0.0008,<br>0.0384,<br>0.0394 | 0.044,<br>0.0091,<br>0.0386,<br>0.0396 | 0.095,<br>0.0291,<br>0.0391,<br>0.0400 | 0.219,<br>0.0488,<br>0.0395,<br>0.0404 | 0.673,<br>0.0989,<br>0.0410,<br>0.0415 |
| cML-BIC                | 0.783,<br>-0.1012,<br>0.0374,<br>0.0375 | 0.267,<br>-0.0509,<br>0.0381,<br>0.0381 | 0.132,<br>-0.0309,<br>0.0383,<br>0.0384 | 0.058,<br>-0.0108,<br>0.0386,<br>0.0388 | 0.047,<br>-0.0008,<br>0.0388,<br>0.0389 | 0.050,<br>0.0093,<br>0.0391,<br>0.0391 | 0.102,<br>0.0293,<br>0.0395,<br>0.0395 | 0.229,<br>0.0492,<br>0.0396,<br>0.0399 | 0.682,<br>0.0995,<br>0.0408,<br>0.0411 |
| cML-MA-BIC-DP, T = 100 | 0.774,<br>-0.1004,<br>0.0371,<br>0.0375 | 0.259,<br>-0.0505,<br>0.0374,<br>0.0382 | 0.127,<br>-0.0307,<br>0.0375,<br>0.0385 | 0.060,<br>-0.0110,<br>0.0377,<br>0.0389 | 0.043,<br>-0.0012,<br>0.0379,<br>0.0391 | 0.043,<br>0.0086,<br>0.0381,<br>0.0394 | 0.091,<br>0.0283,<br>0.0386,<br>0.0399 | 0.205,<br>0.0480,<br>0.0392,<br>0.0405 | 0.647,<br>0.0976,<br>0.0408,<br>0.0421 |
| cML-BIC-DP, T = 100    | 0.803,<br>-0.1016,<br>0.0373,<br>0.0366 | 0.281,<br>-0.0514,<br>0.0379,<br>0.0375 | 0.145,<br>-0.0314,<br>0.0382,<br>0.0379 | 0.068,<br>-0.0113,<br>0.0385,<br>0.0383 | 0.051,<br>-0.0013,<br>0.0387,<br>0.0385 | 0.052,<br>0.0087,<br>0.0389,<br>0.0388 | 0.104,<br>0.0288,<br>0.0393,<br>0.0393 | 0.226,<br>0.0487,<br>0.0398,<br>0.0398 | 0.682,<br>0.0988,<br>0.0411,<br>0.0411 |
| cML-MA-BIC-DP, T = 200 | 0.756,<br>-0.1002,<br>0.0372,<br>0.0378 | 0.258,<br>-0.0503,<br>0.0375,<br>0.0385 | 0.119,<br>-0.0305,<br>0.0376,<br>0.0388 | 0.058,<br>-0.0108,<br>0.0378,<br>0.0392 | 0.041,<br>-0.0010,<br>0.0380,<br>0.0394 | 0.045,<br>0.0089,<br>0.0382,<br>0.0396 | 0.091,<br>0.0285,<br>0.0387,<br>0.0401 | 0.202,<br>0.0483,<br>0.0393,<br>0.0406 | 0.654,<br>0.0979,<br>0.0409,<br>0.0422 |
| cML-BIC-DP, T = 200    | 0.785,<br>-0.1014,<br>0.0374,<br>0.0369 | 0.278,<br>-0.0512,<br>0.0380,<br>0.0377 | 0.138,<br>-0.0311,<br>0.0383,<br>0.0381 | 0.064,<br>-0.0111,<br>0.0386,<br>0.0385 | 0.052,<br>-0.0010,<br>0.0388,<br>0.0387 | 0.050,<br>0.0090,<br>0.0389,<br>0.0390 | 0.104,<br>0.0290,<br>0.0394,<br>0.0394 | 0.227,<br>0.0490,<br>0.0398,<br>0.0399 | 0.684,<br>0.0992,<br>0.0410,<br>0.0412 |
| cML-MA-BIC-DP, T = 500 | 0.761,<br>-0.1002,<br>0.0371,<br>0.0377 | 0.254,<br>-0.0503,<br>0.0374,<br>0.0384 | 0.120,<br>-0.0306,<br>0.0375,<br>0.0387 | 0.056,<br>-0.0108,<br>0.0377,<br>0.0390 | 0.040,<br>-0.0010,<br>0.0378,<br>0.0392 | 0.043,<br>0.0088,<br>0.0380,<br>0.0394 | 0.092,<br>0.0285,<br>0.0385,<br>0.0399 | 0.214,<br>0.0483,<br>0.0391,<br>0.0405 | 0.655,<br>0.0979,<br>0.0408,<br>0.0420 |
| cML-BIC-DP, T = 500    | 0.789,<br>-0.1014,<br>0.0373,<br>0.0369 | 0.277,<br>-0.0512,<br>0.0379,<br>0.0376 | 0.135,<br>-0.0312,<br>0.0382,<br>0.0380 | 0.063,<br>-0.0111,<br>0.0385,<br>0.0384 | 0.049,<br>-0.0011,<br>0.0386,<br>0.0386 | 0.053,<br>0.0089,<br>0.0388,<br>0.0388 | 0.107,<br>0.0289,<br>0.0392,<br>0.0393 | 0.232,<br>0.0490,<br>0.0397,<br>0.0398 | 0.683,<br>0.0991,<br>0.0410,<br>0.0410 |



Table S96: Comparison of cML-MA-BIC and cML-BIC with cML-MA-BIC-DP and cML-BIC-DP: in each cell, from top to bottom are empirical type-I error/power, mean( $\hat{\theta}$ ), SD( $\hat{\theta}$ ), mean(SE( $\hat{\theta}$ )) when  $m = 10$ , the InSIDE violated,  $q = 0.6$ ,  $n = 100000$ .

| Methods \ $\theta$     | -0.1                                    | -0.05                                   | -0.03                                   | -0.01                                   | 0                                      | 0.01                                   | 0.03                                   | 0.05                                   | 0.1                                    |
|------------------------|-----------------------------------------|-----------------------------------------|-----------------------------------------|-----------------------------------------|----------------------------------------|----------------------------------------|----------------------------------------|----------------------------------------|----------------------------------------|
| cML-MA-BIC             | 0.955,<br>-0.0988,<br>0.0260,<br>0.0267 | 0.451,<br>-0.0488,<br>0.0265,<br>0.0272 | 0.188,<br>-0.0288,<br>0.0266,<br>0.0274 | 0.050,<br>-0.0089,<br>0.0268,<br>0.0276 | 0.036,<br>0.0010,<br>0.0270,<br>0.0278 | 0.053,<br>0.0109,<br>0.0271,<br>0.0279 | 0.202,<br>0.0308,<br>0.0275,<br>0.0281 | 0.446,<br>0.0507,<br>0.0279,<br>0.0284 | 0.935,<br>0.1007,<br>0.0288,<br>0.0293 |
| cML-BIC                | 0.960,<br>-0.0991,<br>0.0260,<br>0.0264 | 0.466,<br>-0.0491,<br>0.0265,<br>0.0269 | 0.198,<br>-0.0291,<br>0.0267,<br>0.0271 | 0.055,<br>-0.0091,<br>0.0270,<br>0.0273 | 0.039,<br>0.0009,<br>0.0271,<br>0.0275 | 0.056,<br>0.0109,<br>0.0273,<br>0.0276 | 0.208,<br>0.0310,<br>0.0276,<br>0.0279 | 0.457,<br>0.0510,<br>0.0279,<br>0.0282 | 0.938,<br>0.1010,<br>0.0288,<br>0.0290 |
| cML-MA-BIC-DP, T = 100 | 0.954,<br>-0.0984,<br>0.0261,<br>0.0263 | 0.457,<br>-0.0485,<br>0.0264,<br>0.0268 | 0.183,<br>-0.0287,<br>0.0264,<br>0.0270 | 0.055,<br>-0.0090,<br>0.0266,<br>0.0273 | 0.039,<br>0.0008,<br>0.0267,<br>0.0274 | 0.057,<br>0.0107,<br>0.0269,<br>0.0276 | 0.195,<br>0.0303,<br>0.0273,<br>0.0280 | 0.433,<br>0.0501,<br>0.0278,<br>0.0284 | 0.919,<br>0.1000,<br>0.0289,<br>0.0294 |
| cML-BIC-DP, T = 100    | 0.961,<br>-0.0992,<br>0.0260,<br>0.0257 | 0.487,<br>-0.0492,<br>0.0265,<br>0.0263 | 0.203,<br>-0.0291,<br>0.0268,<br>0.0266 | 0.061,<br>-0.0091,<br>0.0270,<br>0.0269 | 0.044,<br>0.0009,<br>0.0272,<br>0.0270 | 0.065,<br>0.0108,<br>0.0273,<br>0.0272 | 0.213,<br>0.0309,<br>0.0276,<br>0.0275 | 0.464,<br>0.0509,<br>0.0280,<br>0.0278 | 0.933,<br>0.1009,<br>0.0289,<br>0.0288 |
| cML-MA-BIC-DP, T = 200 | 0.957,<br>-0.0984,<br>0.0260,<br>0.0265 | 0.449,<br>-0.0485,<br>0.0263,<br>0.0270 | 0.184,<br>-0.0287,<br>0.0264,<br>0.0272 | 0.051,<br>-0.0090,<br>0.0265,<br>0.0274 | 0.038,<br>0.0008,<br>0.0266,<br>0.0275 | 0.056,<br>0.0107,<br>0.0268,<br>0.0277 | 0.195,<br>0.0304,<br>0.0273,<br>0.0281 | 0.444,<br>0.0502,<br>0.0278,<br>0.0284 | 0.928,<br>0.1000,<br>0.0289,<br>0.0295 |
| cML-BIC-DP, T = 200    | 0.964,<br>-0.0992,<br>0.0261,<br>0.0259 | 0.472,<br>-0.0491,<br>0.0265,<br>0.0264 | 0.206,<br>-0.0291,<br>0.0267,<br>0.0267 | 0.058,<br>-0.0091,<br>0.0270,<br>0.0271 | 0.044,<br>0.0009,<br>0.0271,<br>0.0271 | 0.061,<br>0.0109,<br>0.0272,<br>0.0273 | 0.213,<br>0.0309,<br>0.0276,<br>0.0276 | 0.468,<br>0.0509,<br>0.0279,<br>0.0279 | 0.938,<br>0.1010,<br>0.0288,<br>0.0288 |
| cML-MA-BIC-DP, T = 500 | 0.956,<br>-0.0984,<br>0.0261,<br>0.0265 | 0.461,<br>-0.0485,<br>0.0264,<br>0.0269 | 0.187,<br>-0.0286,<br>0.0265,<br>0.0271 | 0.052,<br>-0.0089,<br>0.0266,<br>0.0273 | 0.039,<br>0.0009,<br>0.0268,<br>0.0275 | 0.056,<br>0.0107,<br>0.0269,<br>0.0276 | 0.200,<br>0.0304,<br>0.0274,<br>0.0280 | 0.443,<br>0.0502,<br>0.0279,<br>0.0284 | 0.929,<br>0.1001,<br>0.0290,<br>0.0294 |
| cML-BIC-DP, T = 500    | 0.962,<br>-0.0991,<br>0.0262,<br>0.0258 | 0.486,<br>-0.0491,<br>0.0266,<br>0.0264 | 0.205,<br>-0.0291,<br>0.0268,<br>0.0266 | 0.062,<br>-0.0091,<br>0.0271,<br>0.0269 | 0.048,<br>0.0009,<br>0.0272,<br>0.0271 | 0.067,<br>0.0109,<br>0.0274,<br>0.0272 | 0.215,<br>0.0309,<br>0.0277,<br>0.0275 | 0.465,<br>0.0509,<br>0.0280,<br>0.0278 | 0.939,<br>0.1010,<br>0.0289,<br>0.0287 |

Table S97: Comparison of cML-MA-BIC and cML-BIC with cML-MA-BIC-DP and cML-BIC-DP: in each cell, from top to bottom are empirical type-I error/power, mean( $\hat{\theta}$ ), SD( $\hat{\theta}$ ), mean(SE( $\hat{\theta}$ )) when  $m = 10$ , the InSIDE violated,  $q = 0.6$ ,  $n = 200000$ .

| Methods \ $\theta$     | -0.1                                    | -0.05                                   | -0.03                                   | -0.01                                   | 0                                       | 0.01                                   | 0.03                                   | 0.05                                   | 0.1                                    |
|------------------------|-----------------------------------------|-----------------------------------------|-----------------------------------------|-----------------------------------------|-----------------------------------------|----------------------------------------|----------------------------------------|----------------------------------------|----------------------------------------|
| cML-MA-BIC             | 0.998,<br>-0.0999,<br>0.0187,<br>0.0189 | 0.748,<br>-0.0499,<br>0.0190,<br>0.0192 | 0.334,<br>-0.0299,<br>0.0190,<br>0.0194 | 0.076,<br>-0.0100,<br>0.0192,<br>0.0196 | 0.048,<br>-0.0001,<br>0.0193,<br>0.0197 | 0.079,<br>0.0099,<br>0.0193,<br>0.0197 | 0.325,<br>0.0298,<br>0.0196,<br>0.0199 | 0.709,<br>0.0498,<br>0.0198,<br>0.0202 | 0.997,<br>0.0998,<br>0.0203,<br>0.0207 |
| cML-BIC                | 0.998,<br>-0.1001,<br>0.0187,<br>0.0187 | 0.756,<br>-0.0501,<br>0.0189,<br>0.0190 | 0.347,<br>-0.0301,<br>0.0191,<br>0.0192 | 0.079,<br>-0.0100,<br>0.0193,<br>0.0194 | 0.051,<br>0.0000,<br>0.0194,<br>0.0195  | 0.086,<br>0.0100,<br>0.0195,<br>0.0196 | 0.335,<br>0.0300,<br>0.0196,<br>0.0198 | 0.714,<br>0.0500,<br>0.0198,<br>0.0200 | 0.998,<br>0.1000,<br>0.0204,<br>0.0205 |
| cML-MA-BIC-DP, T = 100 | 0.996,<br>-0.0997,<br>0.0188,<br>0.0186 | 0.752,<br>-0.0497,<br>0.0190,<br>0.0190 | 0.343,<br>-0.0298,<br>0.0190,<br>0.0191 | 0.077,<br>-0.0100,<br>0.0190,<br>0.0193 | 0.054,<br>-0.0001,<br>0.0191,<br>0.0194 | 0.082,<br>0.0097,<br>0.0192,<br>0.0195 | 0.324,<br>0.0295,<br>0.0195,<br>0.0198 | 0.703,<br>0.0494,<br>0.0198,<br>0.0201 | 0.995,<br>0.0994,<br>0.0204,<br>0.0208 |
| cML-BIC-DP, T = 100    | 0.997,<br>-0.1002,<br>0.0187,<br>0.0182 | 0.771,<br>-0.0502,<br>0.0190,<br>0.0186 | 0.373,<br>-0.0302,<br>0.0191,<br>0.0188 | 0.085,<br>-0.0102,<br>0.0193,<br>0.0190 | 0.061,<br>-0.0002,<br>0.0193,<br>0.0192 | 0.088,<br>0.0098,<br>0.0195,<br>0.0193 | 0.341,<br>0.0298,<br>0.0197,<br>0.0195 | 0.720,<br>0.0498,<br>0.0198,<br>0.0197 | 0.997,<br>0.0999,<br>0.0204,<br>0.0204 |
| cML-MA-BIC-DP, T = 200 | 0.997,<br>-0.0998,<br>0.0187,<br>0.0187 | 0.755,<br>-0.0497,<br>0.0190,<br>0.0191 | 0.342,<br>-0.0298,<br>0.0190,<br>0.0192 | 0.076,<br>-0.0100,<br>0.0190,<br>0.0194 | 0.047,<br>-0.0002,<br>0.0191,<br>0.0195 | 0.080,<br>0.0097,<br>0.0192,<br>0.0196 | 0.329,<br>0.0295,<br>0.0195,<br>0.0199 | 0.701,<br>0.0494,<br>0.0198,<br>0.0201 | 0.996,<br>0.0994,<br>0.0203,<br>0.0208 |
| cML-BIC-DP, T = 200    | 0.997,<br>-0.1002,<br>0.0187,<br>0.0183 | 0.773,<br>-0.0502,<br>0.0190,<br>0.0187 | 0.365,<br>-0.0302,<br>0.0191,<br>0.0189 | 0.085,<br>-0.0102,<br>0.0192,<br>0.0191 | 0.052,<br>-0.0002,<br>0.0193,<br>0.0192 | 0.083,<br>0.0098,<br>0.0194,<br>0.0194 | 0.345,<br>0.0298,<br>0.0196,<br>0.0196 | 0.714,<br>0.0498,<br>0.0197,<br>0.0198 | 0.997,<br>0.0999,<br>0.0203,<br>0.0204 |
| cML-MA-BIC-DP, T = 500 | 0.998,<br>-0.0997,<br>0.0187,<br>0.0186 | 0.758,<br>-0.0497,<br>0.0189,<br>0.0190 | 0.341,<br>-0.0298,<br>0.0190,<br>0.0191 | 0.076,<br>-0.0100,<br>0.0190,<br>0.0193 | 0.046,<br>-0.0001,<br>0.0191,<br>0.0194 | 0.078,<br>0.0097,<br>0.0192,<br>0.0195 | 0.321,<br>0.0295,<br>0.0195,<br>0.0198 | 0.709,<br>0.0494,<br>0.0198,<br>0.0200 | 0.997,<br>0.0994,<br>0.0203,<br>0.0207 |
| cML-BIC-DP, T = 500    | 0.998,<br>-0.1002,<br>0.0187,<br>0.0183 | 0.773,<br>-0.0501,<br>0.0190,<br>0.0187 | 0.362,<br>-0.0301,<br>0.0191,<br>0.0188 | 0.080,<br>-0.0101,<br>0.0192,<br>0.0190 | 0.048,<br>-0.0001,<br>0.0193,<br>0.0192 | 0.090,<br>0.0099,<br>0.0194,<br>0.0193 | 0.341,<br>0.0298,<br>0.0196,<br>0.0195 | 0.723,<br>0.0498,<br>0.0198,<br>0.0197 | 0.998,<br>0.0999,<br>0.0203,<br>0.0203 |

Table S98: Comparison of cML-MA-BIC and cML-BIC with cML-MA-BIC-DP and cML-BIC-DP: in each cell, from top to bottom are empirical type-I error/power, mean( $\hat{\theta}$ ), SD( $\hat{\theta}$ ), mean(SE( $\hat{\theta}$ )) when  $m = 20$ , the InSIDE violated,  $q = 0.6$ ,  $n = 50000$ .

| Methods \ $\theta$     | -0.1                                    | -0.05                                   | -0.03                                   | -0.01                                   | 0                                       | 0.01                                   | 0.03                                   | 0.05                                   | 0.1                                    |
|------------------------|-----------------------------------------|-----------------------------------------|-----------------------------------------|-----------------------------------------|-----------------------------------------|----------------------------------------|----------------------------------------|----------------------------------------|----------------------------------------|
| cML-MA-BIC             | 0.957,<br>-0.1000,<br>0.0265,<br>0.0274 | 0.435,<br>-0.0500,<br>0.0270,<br>0.0279 | 0.194,<br>-0.0301,<br>0.0271,<br>0.0281 | 0.063,<br>-0.0102,<br>0.0273,<br>0.0284 | 0.037,<br>-0.0002,<br>0.0274,<br>0.0285 | 0.053,<br>0.0097,<br>0.0275,<br>0.0286 | 0.165,<br>0.0296,<br>0.0279,<br>0.0289 | 0.401,<br>0.0496,<br>0.0282,<br>0.0292 | 0.917,<br>0.0996,<br>0.0291,<br>0.0300 |
| cML-BIC                | 0.957,<br>-0.1002,<br>0.0266,<br>0.0271 | 0.446,<br>-0.0502,<br>0.0272,<br>0.0275 | 0.200,<br>-0.0302,<br>0.0274,<br>0.0277 | 0.065,<br>-0.0102,<br>0.0277,<br>0.0280 | 0.042,<br>-0.0002,<br>0.0277,<br>0.0281 | 0.060,<br>0.0098,<br>0.0279,<br>0.0282 | 0.180,<br>0.0298,<br>0.0281,<br>0.0285 | 0.423,<br>0.0498,<br>0.0284,<br>0.0288 | 0.922,<br>0.0998,<br>0.0292,<br>0.0296 |
| cML-MA-BIC-DP, T = 100 | 0.929,<br>-0.0986,<br>0.0266,<br>0.0291 | 0.385,<br>-0.0488,<br>0.0267,<br>0.0293 | 0.162,<br>-0.0292,<br>0.0267,<br>0.0294 | 0.052,<br>-0.0098,<br>0.0267,<br>0.0295 | 0.031,<br>-0.0001,<br>0.0268,<br>0.0296 | 0.041,<br>0.0096,<br>0.0270,<br>0.0297 | 0.138,<br>0.0290,<br>0.0274,<br>0.0301 | 0.353,<br>0.0486,<br>0.0279,<br>0.0306 | 0.880,<br>0.0981,<br>0.0292,<br>0.0317 |
| cML-BIC-DP, T = 100    | 0.950,<br>-0.0998,<br>0.0267,<br>0.0278 | 0.425,<br>-0.0497,<br>0.0271,<br>0.0282 | 0.189,<br>-0.0298,<br>0.0272,<br>0.0284 | 0.065,<br>-0.0099,<br>0.0275,<br>0.0286 | 0.037,<br>0.0000,<br>0.0276,<br>0.0287  | 0.060,<br>0.0099,<br>0.0277,<br>0.0289 | 0.165,<br>0.0297,<br>0.0281,<br>0.0291 | 0.406,<br>0.0497,<br>0.0284,<br>0.0294 | 0.899,<br>0.0995,<br>0.0295,<br>0.0304 |
| cML-MA-BIC-DP, T = 200 | 0.935,<br>-0.0989,<br>0.0266,<br>0.0286 | 0.392,<br>-0.0492,<br>0.0267,<br>0.0289 | 0.169,<br>-0.0296,<br>0.0267,<br>0.0290 | 0.053,<br>-0.0101,<br>0.0267,<br>0.0292 | 0.033,<br>-0.0005,<br>0.0268,<br>0.0293 | 0.043,<br>0.0092,<br>0.0269,<br>0.0294 | 0.138,<br>0.0286,<br>0.0274,<br>0.0299 | 0.345,<br>0.0482,<br>0.0279,<br>0.0303 | 0.880,<br>0.0977,<br>0.0291,<br>0.0316 |
| cML-BIC-DP, T = 200    | 0.955,<br>-0.1002,<br>0.0266,<br>0.0273 | 0.438,<br>-0.0502,<br>0.0271,<br>0.0278 | 0.191,<br>-0.0302,<br>0.0272,<br>0.0281 | 0.067,<br>-0.0103,<br>0.0275,<br>0.0283 | 0.041,<br>-0.0004,<br>0.0276,<br>0.0284 | 0.056,<br>0.0095,<br>0.0277,<br>0.0286 | 0.174,<br>0.0294,<br>0.0281,<br>0.0289 | 0.414,<br>0.0492,<br>0.0285,<br>0.0292 | 0.898,<br>0.0991,<br>0.0294,<br>0.0302 |
| cML-MA-BIC-DP, T = 500 | 0.936,<br>-0.0986,<br>0.0265,<br>0.0290 | 0.373,<br>-0.0489,<br>0.0266,<br>0.0293 | 0.160,<br>-0.0293,<br>0.0265,<br>0.0293 | 0.050,<br>-0.0099,<br>0.0265,<br>0.0295 | 0.027,<br>-0.0003,<br>0.0266,<br>0.0296 | 0.038,<br>0.0094,<br>0.0268,<br>0.0297 | 0.127,<br>0.0288,<br>0.0272,<br>0.0302 | 0.341,<br>0.0483,<br>0.0278,<br>0.0306 | 0.877,<br>0.0978,<br>0.0290,<br>0.0319 |
| cML-BIC-DP, T = 500    | 0.945,<br>-0.0999,<br>0.0266,<br>0.0278 | 0.429,<br>-0.0499,<br>0.0269,<br>0.0282 | 0.183,<br>-0.0300,<br>0.0271,<br>0.0284 | 0.061,<br>-0.0101,<br>0.0273,<br>0.0287 | 0.036,<br>-0.0002,<br>0.0274,<br>0.0288 | 0.056,<br>0.0097,<br>0.0276,<br>0.0289 | 0.165,<br>0.0295,<br>0.0279,<br>0.0292 | 0.394,<br>0.0494,<br>0.0283,<br>0.0295 | 0.906,<br>0.0993,<br>0.0293,<br>0.0305 |

Table S99: Comparison of cML-MA-BIC and cML-BIC with cML-MA-BIC-DP and cML-BIC-DP: in each cell, from top to bottom are empirical type-I error/power, mean( $\hat{\theta}$ ), SD( $\hat{\theta}$ ), mean(SE( $\hat{\theta}$ )) when  $m = 20$ , the InSIDE violated,  $q = 0.6$ ,  $n = 100000$ .

| Methods \ $\theta$     | -0.1                                    | -0.05                                   | -0.03                                   | -0.01                                   | 0                                      | 0.01                                   | 0.03                                   | 0.05                                   | 0.1                                    |
|------------------------|-----------------------------------------|-----------------------------------------|-----------------------------------------|-----------------------------------------|----------------------------------------|----------------------------------------|----------------------------------------|----------------------------------------|----------------------------------------|
| cML-MA-BIC             | 0.999,<br>-0.0996,<br>0.0195,<br>0.0193 | 0.700,<br>-0.0495,<br>0.0198,<br>0.0196 | 0.330,<br>-0.0295,<br>0.0198,<br>0.0198 | 0.078,<br>-0.0095,<br>0.0201,<br>0.0199 | 0.051,<br>0.0004,<br>0.0201,<br>0.0200 | 0.086,<br>0.0104,<br>0.0202,<br>0.0201 | 0.332,<br>0.0304,<br>0.0204,<br>0.0203 | 0.695,<br>0.0504,<br>0.0207,<br>0.0205 | 0.997,<br>0.1005,<br>0.0212,<br>0.0211 |
| cML-BIC                | 0.999,<br>-0.0996,<br>0.0195,<br>0.0191 | 0.711,<br>-0.0496,<br>0.0198,<br>0.0194 | 0.338,<br>-0.0296,<br>0.0199,<br>0.0196 | 0.080,<br>-0.0096,<br>0.0201,<br>0.0197 | 0.055,<br>0.0004,<br>0.0202,<br>0.0198 | 0.091,<br>0.0105,<br>0.0203,<br>0.0199 | 0.342,<br>0.0305,<br>0.0205,<br>0.0201 | 0.703,<br>0.0505,<br>0.0207,<br>0.0203 | 0.997,<br>0.1005,<br>0.0212,<br>0.0209 |
| cML-MA-BIC-DP, T = 100 | 0.998,<br>-0.0989,<br>0.0196,<br>0.0201 | 0.663,<br>-0.0488,<br>0.0198,<br>0.0203 | 0.296,<br>-0.0290,<br>0.0198,<br>0.0204 | 0.066,<br>-0.0093,<br>0.0197,<br>0.0205 | 0.040,<br>0.0005,<br>0.0198,<br>0.0205 | 0.070,<br>0.0103,<br>0.0199,<br>0.0207 | 0.299,<br>0.0299,<br>0.0202,<br>0.0209 | 0.659,<br>0.0498,<br>0.0206,<br>0.0212 | 0.994,<br>0.0997,<br>0.0212,<br>0.0219 |
| cML-BIC-DP, T = 100    | 0.999,<br>-0.0996,<br>0.0196,<br>0.0193 | 0.698,<br>-0.0495,<br>0.0199,<br>0.0196 | 0.337,<br>-0.0295,<br>0.0200,<br>0.0198 | 0.081,<br>-0.0095,<br>0.0201,<br>0.0199 | 0.054,<br>0.0005,<br>0.0202,<br>0.0200 | 0.089,<br>0.0105,<br>0.0203,<br>0.0201 | 0.333,<br>0.0305,<br>0.0205,<br>0.0203 | 0.706,<br>0.0505,<br>0.0207,<br>0.0205 | 0.994,<br>0.1005,<br>0.0213,<br>0.0211 |
| cML-MA-BIC-DP, T = 200 | 0.999,<br>-0.0991,<br>0.0196,<br>0.0197 | 0.672,<br>-0.0490,<br>0.0198,<br>0.0200 | 0.308,<br>-0.0292,<br>0.0197,<br>0.0201 | 0.068,<br>-0.0095,<br>0.0197,<br>0.0202 | 0.043,<br>0.0003,<br>0.0198,<br>0.0203 | 0.075,<br>0.0101,<br>0.0198,<br>0.0204 | 0.308,<br>0.0298,<br>0.0202,<br>0.0207 | 0.659,<br>0.0496,<br>0.0205,<br>0.0211 | 0.993,<br>0.0995,<br>0.0212,<br>0.0218 |
| cML-BIC-DP, T = 200    | 0.999,<br>-0.0997,<br>0.0196,<br>0.0190 | 0.707,<br>-0.0496,<br>0.0199,<br>0.0193 | 0.351,<br>-0.0296,<br>0.0200,<br>0.0195 | 0.077,<br>-0.0096,<br>0.0201,<br>0.0197 | 0.056,<br>0.0004,<br>0.0201,<br>0.0198 | 0.092,<br>0.0103,<br>0.0202,<br>0.0199 | 0.344,<br>0.0303,<br>0.0204,<br>0.0201 | 0.699,<br>0.0503,<br>0.0207,<br>0.0204 | 0.995,<br>0.1003,<br>0.0213,<br>0.0210 |
| cML-MA-BIC-DP, T = 500 | 0.998,<br>-0.0989,<br>0.0195,<br>0.0200 | 0.662,<br>-0.0489,<br>0.0197,<br>0.0203 | 0.297,<br>-0.0290,<br>0.0197,<br>0.0204 | 0.061,<br>-0.0094,<br>0.0196,<br>0.0205 | 0.039,<br>0.0004,<br>0.0197,<br>0.0205 | 0.065,<br>0.0102,<br>0.0198,<br>0.0207 | 0.299,<br>0.0298,<br>0.0201,<br>0.0210 | 0.649,<br>0.0496,<br>0.0205,<br>0.0213 | 0.993,<br>0.0996,<br>0.0211,<br>0.0220 |
| cML-BIC-DP, T = 500    | 0.999,<br>-0.0996,<br>0.0195,<br>0.0193 | 0.709,<br>-0.0495,<br>0.0198,<br>0.0196 | 0.338,<br>-0.0295,<br>0.0199,<br>0.0198 | 0.075,<br>-0.0095,<br>0.0200,<br>0.0199 | 0.050,<br>0.0004,<br>0.0201,<br>0.0200 | 0.084,<br>0.0104,<br>0.0202,<br>0.0201 | 0.330,<br>0.0304,<br>0.0204,<br>0.0204 | 0.693,<br>0.0504,<br>0.0206,<br>0.0206 | 0.997,<br>0.1005,<br>0.0212,<br>0.0212 |

Table S100: Comparison of cML-MA-BIC and cML-BIC with cML-MA-BIC-DP and cML-BIC-DP: in each cell, from top to bottom are empirical type-I error/power, mean( $\hat{\theta}$ ), SD( $\hat{\theta}$ ), mean(SE( $\hat{\theta}$ )) when  $m = 20$ , the InSIDE violated,  $q = 0.6$ ,  $n = 200000$ .

| Methods \ $\theta$     | -0.1                                    | -0.05                                   | -0.03                                   | -0.01                                   | 0                                      | 0.01                                   | 0.03                                   | 0.05                                   | 0.1                                    |
|------------------------|-----------------------------------------|-----------------------------------------|-----------------------------------------|-----------------------------------------|----------------------------------------|----------------------------------------|----------------------------------------|----------------------------------------|----------------------------------------|
| cML-MA-BIC             | 1.000,<br>-0.0998,<br>0.0143,<br>0.0136 | 0.944,<br>-0.0498,<br>0.0145,<br>0.0139 | 0.567,<br>-0.0298,<br>0.0146,<br>0.0140 | 0.122,<br>-0.0098,<br>0.0147,<br>0.0141 | 0.052,<br>0.0001,<br>0.0147,<br>0.0142 | 0.110,<br>0.0101,<br>0.0148,<br>0.0142 | 0.564,<br>0.0301,<br>0.0149,<br>0.0144 | 0.916,<br>0.0501,<br>0.0151,<br>0.0145 | 1.000,<br>0.1001,<br>0.0154,<br>0.0149 |
| cML-BIC                | 1.000,<br>-0.0999,<br>0.0143,<br>0.0135 | 0.946,<br>-0.0499,<br>0.0145,<br>0.0138 | 0.573,<br>-0.0299,<br>0.0146,<br>0.0139 | 0.125,<br>-0.0098,<br>0.0147,<br>0.0140 | 0.054,<br>0.0001,<br>0.0147,<br>0.0140 | 0.115,<br>0.0101,<br>0.0148,<br>0.0141 | 0.572,<br>0.0301,<br>0.0149,<br>0.0142 | 0.919,<br>0.0502,<br>0.0150,<br>0.0144 | 1.000,<br>0.1002,<br>0.0154,<br>0.0148 |
| cML-MA-BIC-DP, T = 100 | 1.000,<br>-0.0995,<br>0.0144,<br>0.0140 | 0.932,<br>-0.0495,<br>0.0145,<br>0.0143 | 0.531,<br>-0.0296,<br>0.0146,<br>0.0143 | 0.116,<br>-0.0098,<br>0.0145,<br>0.0144 | 0.048,<br>0.0000,<br>0.0146,<br>0.0144 | 0.099,<br>0.0099,<br>0.0146,<br>0.0145 | 0.528,<br>0.0297,<br>0.0149,<br>0.0147 | 0.899,<br>0.0496,<br>0.0151,<br>0.0149 | 1.000,<br>0.0996,<br>0.0155,<br>0.0153 |
| cML-BIC-DP, T = 100    | 1.000,<br>-0.0999,<br>0.0144,<br>0.0136 | 0.939,<br>-0.0499,<br>0.0146,<br>0.0138 | 0.563,<br>-0.0299,<br>0.0147,<br>0.0139 | 0.129,<br>-0.0099,<br>0.0147,<br>0.0141 | 0.053,<br>0.0001,<br>0.0148,<br>0.0141 | 0.116,<br>0.0101,<br>0.0148,<br>0.0142 | 0.567,<br>0.0300,<br>0.0149,<br>0.0143 | 0.912,<br>0.0501,<br>0.0151,<br>0.0145 | 1.000,<br>0.1001,<br>0.0154,<br>0.0148 |
| cML-MA-BIC-DP, T = 200 | 1.000,<br>-0.0996,<br>0.0144,<br>0.0138 | 0.936,<br>-0.0495,<br>0.0146,<br>0.0141 | 0.546,<br>-0.0296,<br>0.0146,<br>0.0142 | 0.111,<br>-0.0098,<br>0.0146,<br>0.0142 | 0.048,<br>0.0000,<br>0.0146,<br>0.0143 | 0.100,<br>0.0099,<br>0.0147,<br>0.0144 | 0.541,<br>0.0297,<br>0.0149,<br>0.0146 | 0.900,<br>0.0496,<br>0.0151,<br>0.0148 | 1.000,<br>0.0996,<br>0.0155,<br>0.0153 |
| cML-BIC-DP, T = 200    | 1.000,<br>-0.0999,<br>0.0144,<br>0.0134 | 0.944,<br>-0.0499,<br>0.0146,<br>0.0137 | 0.578,<br>-0.0299,<br>0.0147,<br>0.0138 | 0.132,<br>-0.0099,<br>0.0148,<br>0.0139 | 0.055,<br>0.0001,<br>0.0148,<br>0.0140 | 0.115,<br>0.0100,<br>0.0148,<br>0.0141 | 0.573,<br>0.0300,<br>0.0150,<br>0.0142 | 0.914,<br>0.0500,<br>0.0151,<br>0.0144 | 1.000,<br>0.1000,<br>0.0155,<br>0.0148 |
| cML-MA-BIC-DP, T = 500 | 1.000,<br>-0.0995,<br>0.0143,<br>0.0140 | 0.931,<br>-0.0494,<br>0.0145,<br>0.0143 | 0.535,<br>-0.0295,<br>0.0145,<br>0.0143 | 0.107,<br>-0.0097,<br>0.0145,<br>0.0144 | 0.047,<br>0.0001,<br>0.0145,<br>0.0144 | 0.097,<br>0.0099,<br>0.0146,<br>0.0145 | 0.530,<br>0.0297,<br>0.0149,<br>0.0148 | 0.899,<br>0.0496,<br>0.0151,<br>0.0150 | 1.000,<br>0.0996,<br>0.0154,<br>0.0154 |
| cML-BIC-DP, T = 500    | 1.000,<br>-0.0999,<br>0.0143,<br>0.0136 | 0.943,<br>-0.0499,<br>0.0145,<br>0.0138 | 0.564,<br>-0.0298,<br>0.0146,<br>0.0140 | 0.121,<br>-0.0099,<br>0.0147,<br>0.0141 | 0.052,<br>0.0001,<br>0.0147,<br>0.0142 | 0.106,<br>0.0101,<br>0.0148,<br>0.0142 | 0.565,<br>0.0301,<br>0.0149,<br>0.0144 | 0.916,<br>0.0501,<br>0.0150,<br>0.0145 | 1.000,<br>0.1001,<br>0.0154,<br>0.0149 |

Table S101: Comparison of cML-MA-BIC and cML-BIC with cML-MA-BIC-DP and cML-BIC-DP: in each cell, from top to bottom are empirical type-I error/power, mean( $\hat{\theta}$ ), SD( $\hat{\theta}$ ), mean(SE( $\hat{\theta}$ )) when  $m = 100$ , the InSIDE violated,  $q = 0.6$ ,  $n = 50000$ .

| Methods \ $\theta$     | -0.1                                    | -0.05                                   | -0.03                                   | -0.01                                   | 0                                      | 0.01                                   | 0.03                                   | 0.05                                   | 0.1                                    |
|------------------------|-----------------------------------------|-----------------------------------------|-----------------------------------------|-----------------------------------------|----------------------------------------|----------------------------------------|----------------------------------------|----------------------------------------|----------------------------------------|
| cML-MA-BIC             | 1.000,<br>-0.0996,<br>0.0150,<br>0.0147 | 0.916,<br>-0.0496,<br>0.0151,<br>0.0149 | 0.481,<br>-0.0296,<br>0.0152,<br>0.0149 | 0.116,<br>-0.0096,<br>0.0153,<br>0.0150 | 0.050,<br>0.0003,<br>0.0153,<br>0.0151 | 0.103,<br>0.0103,<br>0.0154,<br>0.0151 | 0.534,<br>0.0303,<br>0.0155,<br>0.0152 | 0.885,<br>0.0503,<br>0.0156,<br>0.0154 | 1.000,<br>0.1003,<br>0.0160,<br>0.0157 |
| cML-BIC                | 1.000,<br>-0.0996,<br>0.0150,<br>0.0146 | 0.923,<br>-0.0496,<br>0.0151,<br>0.0147 | 0.495,<br>-0.0296,<br>0.0152,<br>0.0148 | 0.123,<br>-0.0096,<br>0.0153,<br>0.0149 | 0.054,<br>0.0004,<br>0.0154,<br>0.0149 | 0.110,<br>0.0104,<br>0.0154,<br>0.0150 | 0.543,<br>0.0303,<br>0.0155,<br>0.0151 | 0.888,<br>0.0503,<br>0.0156,<br>0.0152 | 1.000,<br>0.1003,<br>0.0160,<br>0.0155 |
| cML-MA-BIC-DP, T = 100 | 1.000,<br>-0.0988,<br>0.0151,<br>0.0163 | 0.861,<br>-0.0489,<br>0.0152,<br>0.0165 | 0.391,<br>-0.0290,<br>0.0151,<br>0.0165 | 0.074,<br>-0.0094,<br>0.0150,<br>0.0163 | 0.031,<br>0.0003,<br>0.0150,<br>0.0164 | 0.063,<br>0.0100,<br>0.0151,<br>0.0165 | 0.419,<br>0.0295,<br>0.0154,<br>0.0168 | 0.822,<br>0.0493,<br>0.0157,<br>0.0171 | 1.000,<br>0.0992,<br>0.0161,<br>0.0175 |
| cML-BIC-DP, T = 100    | 1.000,<br>-0.0989,<br>0.0152,<br>0.0160 | 0.861,<br>-0.0489,<br>0.0152,<br>0.0162 | 0.407,<br>-0.0291,<br>0.0152,<br>0.0162 | 0.088,<br>-0.0094,<br>0.0151,<br>0.0161 | 0.037,<br>0.0003,<br>0.0151,<br>0.0161 | 0.072,<br>0.0100,<br>0.0152,<br>0.0162 | 0.444,<br>0.0297,<br>0.0155,<br>0.0165 | 0.845,<br>0.0495,<br>0.0157,<br>0.0168 | 1.000,<br>0.0994,<br>0.0161,<br>0.0172 |
| cML-MA-BIC-DP, T = 200 | 1.000,<br>-0.0987,<br>0.0150,<br>0.0163 | 0.865,<br>-0.0488,<br>0.0152,<br>0.0164 | 0.400,<br>-0.0290,<br>0.0151,<br>0.0164 | 0.073,<br>-0.0094,<br>0.0150,<br>0.0163 | 0.034,<br>0.0003,<br>0.0150,<br>0.0163 | 0.060,<br>0.0100,<br>0.0151,<br>0.0164 | 0.429,<br>0.0295,<br>0.0154,<br>0.0167 | 0.831,<br>0.0493,<br>0.0157,<br>0.0170 | 1.000,<br>0.0992,<br>0.0161,<br>0.0174 |
| cML-BIC-DP, T = 200    | 1.000,<br>-0.0988,<br>0.0151,<br>0.0159 | 0.872,<br>-0.0489,<br>0.0153,<br>0.0160 | 0.417,<br>-0.0290,<br>0.0152,<br>0.0160 | 0.088,<br>-0.0094,<br>0.0151,<br>0.0160 | 0.035,<br>0.0004,<br>0.0151,<br>0.0160 | 0.078,<br>0.0101,<br>0.0152,<br>0.0161 | 0.453,<br>0.0297,<br>0.0155,<br>0.0164 | 0.843,<br>0.0496,<br>0.0158,<br>0.0166 | 1.000,<br>0.0994,<br>0.0161,<br>0.0170 |
| cML-MA-BIC-DP, T = 500 | 1.000,<br>-0.0987,<br>0.0150,<br>0.0163 | 0.860,<br>-0.0488,<br>0.0152,<br>0.0165 | 0.401,<br>-0.0290,<br>0.0151,<br>0.0164 | 0.065,<br>-0.0094,<br>0.0150,<br>0.0163 | 0.033,<br>0.0003,<br>0.0150,<br>0.0163 | 0.062,<br>0.0100,<br>0.0150,<br>0.0164 | 0.425,<br>0.0295,<br>0.0154,<br>0.0168 | 0.828,<br>0.0493,<br>0.0157,<br>0.0171 | 1.000,<br>0.0992,<br>0.0160,<br>0.0175 |
| cML-BIC-DP, T = 500    | 1.000,<br>-0.0989,<br>0.0151,<br>0.0159 | 0.868,<br>-0.0490,<br>0.0152,<br>0.0161 | 0.418,<br>-0.0291,<br>0.0152,<br>0.0160 | 0.090,<br>-0.0094,<br>0.0151,<br>0.0160 | 0.040,<br>0.0003,<br>0.0151,<br>0.0160 | 0.078,<br>0.0101,<br>0.0152,<br>0.0161 | 0.454,<br>0.0298,<br>0.0155,<br>0.0164 | 0.838,<br>0.0496,<br>0.0157,<br>0.0166 | 1.000,<br>0.0995,<br>0.0161,<br>0.0170 |

Table S102: Comparison of cML-MA-BIC and cML-BIC with cML-MA-BIC-DP and cML-BIC-DP: in each cell, from top to bottom are empirical type-I error/power, mean( $\hat{\theta}$ ), SD( $\hat{\theta}$ ), mean(SE( $\hat{\theta}$ )) when  $m = 100$ , the InSIDE violated,  $q = 0.6$ ,  $n = 100000$ .

| Methods \ $\theta$     | -0.1                                    | -0.05                                   | -0.03                                   | -0.01                                   | 0                                      | 0.01                                   | 0.03                                   | 0.05                                   | 0.1                                    |
|------------------------|-----------------------------------------|-----------------------------------------|-----------------------------------------|-----------------------------------------|----------------------------------------|----------------------------------------|----------------------------------------|----------------------------------------|----------------------------------------|
| cML-MA-BIC             | 1.000,<br>-0.0998,<br>0.0108,<br>0.0104 | 0.994,<br>-0.0497,<br>0.0109,<br>0.0105 | 0.797,<br>-0.0297,<br>0.0110,<br>0.0106 | 0.165,<br>-0.0097,<br>0.0110,<br>0.0106 | 0.057,<br>0.0003,<br>0.0111,<br>0.0107 | 0.168,<br>0.0103,<br>0.0111,<br>0.0107 | 0.783,<br>0.0303,<br>0.0112,<br>0.0108 | 0.994,<br>0.0503,<br>0.0113,<br>0.0109 | 1.000,<br>0.1003,<br>0.0116,<br>0.0111 |
| cML-BIC                | 1.000,<br>-0.0998,<br>0.0108,<br>0.0103 | 0.994,<br>-0.0498,<br>0.0109,<br>0.0104 | 0.799,<br>-0.0298,<br>0.0110,<br>0.0105 | 0.175,<br>-0.0098,<br>0.0110,<br>0.0106 | 0.058,<br>0.0002,<br>0.0111,<br>0.0106 | 0.174,<br>0.0102,<br>0.0111,<br>0.0106 | 0.785,<br>0.0303,<br>0.0112,<br>0.0107 | 0.994,<br>0.0503,<br>0.0113,<br>0.0108 | 1.000,<br>0.1003,<br>0.0116,<br>0.0110 |
| cML-MA-BIC-DP, T = 100 | 1.000,<br>-0.0992,<br>0.0109,<br>0.0113 | 0.989,<br>-0.0492,<br>0.0110,<br>0.0115 | 0.732,<br>-0.0293,<br>0.0110,<br>0.0115 | 0.121,<br>-0.0095,<br>0.0109,<br>0.0114 | 0.034,<br>0.0002,<br>0.0109,<br>0.0114 | 0.125,<br>0.0100,<br>0.0110,<br>0.0115 | 0.720,<br>0.0298,<br>0.0113,<br>0.0117 | 0.988,<br>0.0497,<br>0.0114,<br>0.0118 | 1.000,<br>0.0997,<br>0.0116,<br>0.0121 |
| cML-BIC-DP, T = 100    | 1.000,<br>-0.0993,<br>0.0110,<br>0.0111 | 0.988,<br>-0.0493,<br>0.0111,<br>0.0112 | 0.731,<br>-0.0293,<br>0.0111,<br>0.0112 | 0.130,<br>-0.0095,<br>0.0110,<br>0.0112 | 0.048,<br>0.0003,<br>0.0110,<br>0.0112 | 0.136,<br>0.0101,<br>0.0111,<br>0.0113 | 0.732,<br>0.0299,<br>0.0113,<br>0.0114 | 0.988,<br>0.0499,<br>0.0114,<br>0.0116 | 1.000,<br>0.0998,<br>0.0117,<br>0.0118 |
| cML-MA-BIC-DP, T = 200 | 1.000,<br>-0.0992,<br>0.0108,<br>0.0113 | 0.989,<br>-0.0492,<br>0.0110,<br>0.0114 | 0.724,<br>-0.0292,<br>0.0110,<br>0.0114 | 0.121,<br>-0.0095,<br>0.0109,<br>0.0113 | 0.034,<br>0.0003,<br>0.0108,<br>0.0113 | 0.128,<br>0.0100,<br>0.0109,<br>0.0114 | 0.718,<br>0.0298,<br>0.0112,<br>0.0117 | 0.988,<br>0.0498,<br>0.0113,<br>0.0118 | 1.000,<br>0.0997,<br>0.0116,<br>0.0120 |
| cML-BIC-DP, T = 200    | 1.000,<br>-0.0993,<br>0.0109,<br>0.0110 | 0.988,<br>-0.0494,<br>0.0110,<br>0.0111 | 0.739,<br>-0.0294,<br>0.0110,<br>0.0111 | 0.142,<br>-0.0096,<br>0.0110,<br>0.0111 | 0.047,<br>0.0002,<br>0.0110,<br>0.0111 | 0.135,<br>0.0101,<br>0.0111,<br>0.0112 | 0.736,<br>0.0299,<br>0.0113,<br>0.0114 | 0.991,<br>0.0499,<br>0.0114,<br>0.0115 | 1.000,<br>0.0999,<br>0.0117,<br>0.0117 |
| cML-MA-BIC-DP, T = 500 | 1.000,<br>-0.0992,<br>0.0108,<br>0.0113 | 0.991,<br>-0.0493,<br>0.0110,<br>0.0114 | 0.732,<br>-0.0293,<br>0.0110,<br>0.0114 | 0.123,<br>-0.0095,<br>0.0108,<br>0.0113 | 0.037,<br>0.0002,<br>0.0108,<br>0.0113 | 0.120,<br>0.0100,<br>0.0109,<br>0.0114 | 0.726,<br>0.0298,<br>0.0112,<br>0.0117 | 0.987,<br>0.0498,<br>0.0113,<br>0.0118 | 1.000,<br>0.0997,<br>0.0116,<br>0.0120 |
| cML-BIC-DP, T = 500    | 1.000,<br>-0.0994,<br>0.0109,<br>0.0109 | 0.991,<br>-0.0494,<br>0.0110,<br>0.0110 | 0.758,<br>-0.0294,<br>0.0110,<br>0.0111 | 0.140,<br>-0.0096,<br>0.0109,<br>0.0110 | 0.048,<br>0.0003,<br>0.0109,<br>0.0111 | 0.136,<br>0.0101,<br>0.0110,<br>0.0111 | 0.753,<br>0.0300,<br>0.0112,<br>0.0113 | 0.989,<br>0.0500,<br>0.0113,<br>0.0114 | 1.000,<br>0.0999,<br>0.0116,<br>0.0116 |

Table S103: Comparison of cML-MA-BIC and cML-BIC with cML-MA-BIC-DP and cML-BIC-DP: in each cell, from top to bottom are empirical type-I error/power, mean( $\hat{\theta}$ ), SD( $\hat{\theta}$ ), mean(SE( $\hat{\theta}$ )) when  $m = 100$ , the InSIDE violated,  $q = 0.6$ ,  $n = 200000$ .

| Methods \ $\theta$     | -0.1                                    | -0.05                                   | -0.03                                   | -0.01                                   | 0                                       | 0.01                                   | 0.03                                   | 0.05                                   | 0.1                                    |
|------------------------|-----------------------------------------|-----------------------------------------|-----------------------------------------|-----------------------------------------|-----------------------------------------|----------------------------------------|----------------------------------------|----------------------------------------|----------------------------------------|
| cML-MA-BIC             | 1.000,<br>-0.1004,<br>0.0072,<br>0.0073 | 1.000,<br>-0.0504,<br>0.0073,<br>0.0074 | 0.982,<br>-0.0304,<br>0.0073,<br>0.0075 | 0.292,<br>-0.0104,<br>0.0074,<br>0.0075 | 0.043,<br>-0.0005,<br>0.0074,<br>0.0075 | 0.234,<br>0.0095,<br>0.0074,<br>0.0076 | 0.978,<br>0.0295,<br>0.0075,<br>0.0076 | 1.000,<br>0.0495,<br>0.0075,<br>0.0077 | 1.000,<br>0.0995,<br>0.0077,<br>0.0078 |
| cML-BIC                | 1.000,<br>-0.1004,<br>0.0072,<br>0.0073 | 1.000,<br>-0.0504,<br>0.0073,<br>0.0074 | 0.981,<br>-0.0304,<br>0.0073,<br>0.0074 | 0.301,<br>-0.0105,<br>0.0074,<br>0.0074 | 0.046,<br>-0.0005,<br>0.0074,<br>0.0075 | 0.239,<br>0.0095,<br>0.0074,<br>0.0075 | 0.977,<br>0.0295,<br>0.0075,<br>0.0076 | 1.000,<br>0.0495,<br>0.0075,<br>0.0076 | 1.000,<br>0.0995,<br>0.0077,<br>0.0078 |
| cML-MA-BIC-DP, T = 100 | 1.000,<br>-0.1001,<br>0.0072,<br>0.0078 | 1.000,<br>-0.0502,<br>0.0073,<br>0.0079 | 0.969,<br>-0.0302,<br>0.0073,<br>0.0080 | 0.234,<br>-0.0103,<br>0.0073,<br>0.0079 | 0.027,<br>-0.0005,<br>0.0073,<br>0.0079 | 0.192,<br>0.0093,<br>0.0073,<br>0.0080 | 0.960,<br>0.0292,<br>0.0075,<br>0.0081 | 1.000,<br>0.0492,<br>0.0076,<br>0.0082 | 1.000,<br>0.0991,<br>0.0077,<br>0.0084 |
| cML-BIC-DP, T = 100    | 1.000,<br>-0.1002,<br>0.0073,<br>0.0076 | 1.000,<br>-0.0502,<br>0.0073,<br>0.0077 | 0.973,<br>-0.0302,<br>0.0074,<br>0.0077 | 0.267,<br>-0.0103,<br>0.0073,<br>0.0077 | 0.038,<br>-0.0004,<br>0.0073,<br>0.0077 | 0.220,<br>0.0094,<br>0.0074,<br>0.0078 | 0.963,<br>0.0293,<br>0.0075,<br>0.0079 | 1.000,<br>0.0493,<br>0.0076,<br>0.0080 | 1.000,<br>0.0992,<br>0.0077,<br>0.0082 |
| cML-MA-BIC-DP, T = 200 | 1.000,<br>-0.1001,<br>0.0072,<br>0.0078 | 1.000,<br>-0.0501,<br>0.0073,<br>0.0079 | 0.970,<br>-0.0302,<br>0.0073,<br>0.0079 | 0.230,<br>-0.0103,<br>0.0073,<br>0.0079 | 0.026,<br>-0.0005,<br>0.0073,<br>0.0079 | 0.195,<br>0.0093,<br>0.0073,<br>0.0079 | 0.958,<br>0.0292,<br>0.0075,<br>0.0081 | 1.000,<br>0.0492,<br>0.0076,<br>0.0082 | 1.000,<br>0.0991,<br>0.0077,<br>0.0083 |
| cML-BIC-DP, T = 200    | 1.000,<br>-0.1002,<br>0.0072,<br>0.0076 | 1.000,<br>-0.0502,<br>0.0073,<br>0.0077 | 0.970,<br>-0.0303,<br>0.0073,<br>0.0077 | 0.263,<br>-0.0103,<br>0.0073,<br>0.0077 | 0.040,<br>-0.0005,<br>0.0073,<br>0.0077 | 0.225,<br>0.0094,<br>0.0074,<br>0.0077 | 0.964,<br>0.0293,<br>0.0075,<br>0.0079 | 1.000,<br>0.0493,<br>0.0076,<br>0.0079 | 1.000,<br>0.0992,<br>0.0078,<br>0.0081 |
| cML-MA-BIC-DP, T = 500 | 1.000,<br>-0.1001,<br>0.0072,<br>0.0078 | 1.000,<br>-0.0501,<br>0.0073,<br>0.0079 | 0.971,<br>-0.0302,<br>0.0073,<br>0.0080 | 0.227,<br>-0.0103,<br>0.0073,<br>0.0079 | 0.028,<br>-0.0005,<br>0.0073,<br>0.0079 | 0.191,<br>0.0093,<br>0.0073,<br>0.0080 | 0.961,<br>0.0292,<br>0.0075,<br>0.0081 | 1.000,<br>0.0492,<br>0.0075,<br>0.0082 | 1.000,<br>0.0991,<br>0.0077,<br>0.0084 |
| cML-BIC-DP, T = 500    | 1.000,<br>-0.1003,<br>0.0073,<br>0.0076 | 1.000,<br>-0.0503,<br>0.0073,<br>0.0077 | 0.971,<br>-0.0303,<br>0.0074,<br>0.0077 | 0.265,<br>-0.0104,<br>0.0073,<br>0.0077 | 0.038,<br>-0.0005,<br>0.0073,<br>0.0077 | 0.214,<br>0.0094,<br>0.0074,<br>0.0077 | 0.968,<br>0.0293,<br>0.0075,<br>0.0079 | 1.000,<br>0.0493,<br>0.0076,<br>0.0079 | 1.000,<br>0.0993,<br>0.0078,<br>0.0081 |

Table S104: Relative frequencies of goodness-of-fit tests' rejecting the null at the  $p$ -value cutoff 0.05 when  $m = 10$ , the InSIDE violated,  $q = 0.6$ .

| Methods \ $\theta$      | -0.1  | -0.05 | -0.03 | -0.01 | 0     | 0.01  | 0.03  | 0.05  | 0.1   |
|-------------------------|-------|-------|-------|-------|-------|-------|-------|-------|-------|
| GOF1, n = 50k, T = 100  | 0.009 | 0.007 | 0.006 | 0.004 | 0.004 | 0.004 | 0.005 | 0.001 | 0.003 |
| GOF2, n = 50k, T = 100  | 0.012 | 0.009 | 0.008 | 0.005 | 0.006 | 0.005 | 0.006 | 0.001 | 0.004 |
| GOF1, n = 50k, T = 200  | 0.002 | 0.002 | 0.002 | 0.003 | 0.003 | 0.003 | 0.003 | 0.001 | 0.003 |
| GOF2, n = 50k, T = 200  | 0.002 | 0.002 | 0.003 | 0.003 | 0.003 | 0.004 | 0.003 | 0.001 | 0.004 |
| GOF1, n = 50k, T = 500  | 0.002 | 0.003 | 0.003 | 0.003 | 0.004 | 0.004 | 0.003 | 0.001 | 0.005 |
| GOF2, n = 50k, T = 500  | 0.002 | 0.003 | 0.003 | 0.003 | 0.004 | 0.004 | 0.003 | 0.001 | 0.005 |
| GOF1, n = 100k, T = 100 | 0.014 | 0.007 | 0.006 | 0.004 | 0.004 | 0.003 | 0.001 | 0.000 | 0.000 |
| GOF2, n = 100k, T = 100 | 0.019 | 0.012 | 0.010 | 0.008 | 0.006 | 0.004 | 0.002 | 0.002 | 0.000 |
| GOF1, n = 100k, T = 200 | 0.002 | 0.001 | 0.001 | 0.001 | 0.001 | 0.001 | 0.000 | 0.000 | 0.000 |
| GOF2, n = 100k, T = 200 | 0.001 | 0.001 | 0.001 | 0.001 | 0.001 | 0.001 | 0.001 | 0.000 | 0.000 |
| GOF1, n = 100k, T = 500 | 0.001 | 0.001 | 0.001 | 0.001 | 0.001 | 0.001 | 0.001 | 0.000 | 0.001 |
| GOF2, n = 100k, T = 500 | 0.001 | 0.001 | 0.001 | 0.001 | 0.001 | 0.001 | 0.001 | 0.000 | 0.001 |
| GOF1, n = 200k, T = 100 | 0.029 | 0.022 | 0.019 | 0.015 | 0.014 | 0.012 | 0.010 | 0.009 | 0.003 |
| GOF2, n = 200k, T = 100 | 0.032 | 0.024 | 0.020 | 0.016 | 0.015 | 0.014 | 0.012 | 0.009 | 0.006 |
| GOF1, n = 200k, T = 200 | 0.015 | 0.004 | 0.003 | 0.002 | 0.002 | 0.001 | 0.001 | 0.001 | 0.001 |
| GOF2, n = 200k, T = 200 | 0.013 | 0.004 | 0.002 | 0.001 | 0.001 | 0.001 | 0.001 | 0.001 | 0.001 |
| GOF1, n = 200k, T = 500 | 0.001 | 0.001 | 0.001 | 0.001 | 0.001 | 0.001 | 0.001 | 0.001 | 0.001 |
| GOF2, n = 200k, T = 500 | 0.001 | 0.001 | 0.001 | 0.001 | 0.001 | 0.001 | 0.001 | 0.001 | 0.001 |

Table S105: Relative frequencies of goodness-of-fit tests' rejecting the null at  $p$ -value cutoff 0.05 when  $m = 20$ , the InSIDE violated,  $q = 0.6$ .

| Methods \ $\theta$      | -0.1  | -0.05 | -0.03 | -0.01 | 0     | 0.01  | 0.03  | 0.05  | 0.1   |
|-------------------------|-------|-------|-------|-------|-------|-------|-------|-------|-------|
| GOF1, n = 50k, T = 100  | 0.047 | 0.056 | 0.055 | 0.052 | 0.051 | 0.051 | 0.056 | 0.055 | 0.057 |
| GOF2, n = 50k, T = 100  | 0.035 | 0.039 | 0.039 | 0.041 | 0.039 | 0.039 | 0.039 | 0.042 | 0.054 |
| GOF1, n = 50k, T = 200  | 0.046 | 0.053 | 0.053 | 0.052 | 0.052 | 0.053 | 0.050 | 0.049 | 0.051 |
| GOF2, n = 50k, T = 200  | 0.045 | 0.051 | 0.052 | 0.050 | 0.047 | 0.049 | 0.045 | 0.045 | 0.053 |
| GOF1, n = 50k, T = 500  | 0.050 | 0.053 | 0.052 | 0.053 | 0.050 | 0.049 | 0.048 | 0.046 | 0.048 |
| GOF2, n = 50k, T = 500  | 0.048 | 0.049 | 0.050 | 0.048 | 0.047 | 0.046 | 0.043 | 0.042 | 0.051 |
| GOF1, n = 100k, T = 100 | 0.062 | 0.068 | 0.076 | 0.078 | 0.082 | 0.084 | 0.085 | 0.087 | 0.092 |
| GOF2, n = 100k, T = 100 | 0.045 | 0.052 | 0.059 | 0.062 | 0.064 | 0.067 | 0.069 | 0.075 | 0.079 |
| GOF1, n = 100k, T = 200 | 0.068 | 0.064 | 0.064 | 0.064 | 0.065 | 0.064 | 0.064 | 0.065 | 0.064 |
| GOF2, n = 100k, T = 200 | 0.065 | 0.063 | 0.065 | 0.063 | 0.063 | 0.063 | 0.062 | 0.062 | 0.067 |
| GOF1, n = 100k, T = 500 | 0.043 | 0.040 | 0.037 | 0.031 | 0.030 | 0.030 | 0.031 | 0.028 | 0.025 |
| GOF2, n = 100k, T = 500 | 0.036 | 0.033 | 0.032 | 0.030 | 0.028 | 0.028 | 0.028 | 0.025 | 0.025 |
| GOF1, n = 200k, T = 100 | 0.066 | 0.071 | 0.075 | 0.079 | 0.080 | 0.083 | 0.086 | 0.088 | 0.101 |
| GOF2, n = 200k, T = 100 | 0.052 | 0.061 | 0.064 | 0.064 | 0.065 | 0.066 | 0.070 | 0.074 | 0.087 |
| GOF1, n = 200k, T = 200 | 0.072 | 0.074 | 0.072 | 0.073 | 0.072 | 0.072 | 0.071 | 0.072 | 0.074 |
| GOF2, n = 200k, T = 200 | 0.067 | 0.068 | 0.065 | 0.066 | 0.065 | 0.066 | 0.066 | 0.065 | 0.066 |
| GOF1, n = 200k, T = 500 | 0.049 | 0.047 | 0.048 | 0.048 | 0.049 | 0.050 | 0.050 | 0.047 | 0.045 |
| GOF2, n = 200k, T = 500 | 0.042 | 0.043 | 0.044 | 0.044 | 0.043 | 0.043 | 0.042 | 0.042 | 0.044 |

Table S106: Relative frequencies of goodness-of-fit tests' rejecting the null at  $p$ -value cutoff 0.05 when  $m = 100$ , the InSIDE violated,  $q = 0.6$ .

| Methods \ $\theta$      | -0.1  | -0.05 | -0.03 | -0.01 | 0     | 0.01  | 0.03  | 0.05  | 0.1   |
|-------------------------|-------|-------|-------|-------|-------|-------|-------|-------|-------|
| GOF1, n = 50k, T = 100  | 0.083 | 0.085 | 0.080 | 0.079 | 0.077 | 0.075 | 0.078 | 0.082 | 0.084 |
| GOF2, n = 50k, T = 100  | 0.063 | 0.068 | 0.063 | 0.059 | 0.060 | 0.062 | 0.059 | 0.065 | 0.075 |
| GOF1, n = 50k, T = 200  | 0.057 | 0.057 | 0.057 | 0.054 | 0.051 | 0.051 | 0.057 | 0.059 | 0.074 |
| GOF2, n = 50k, T = 200  | 0.048 | 0.050 | 0.050 | 0.048 | 0.046 | 0.045 | 0.052 | 0.058 | 0.077 |
| GOF1, n = 50k, T = 500  | 0.057 | 0.057 | 0.056 | 0.054 | 0.051 | 0.048 | 0.059 | 0.081 | 0.105 |
| GOF2, n = 50k, T = 500  | 0.057 | 0.057 | 0.058 | 0.056 | 0.053 | 0.050 | 0.065 | 0.079 | 0.110 |
| GOF1, n = 100k, T = 100 | 0.082 | 0.074 | 0.075 | 0.073 | 0.071 | 0.074 | 0.067 | 0.068 | 0.066 |
| GOF2, n = 100k, T = 100 | 0.065 | 0.060 | 0.061 | 0.058 | 0.056 | 0.056 | 0.055 | 0.054 | 0.053 |
| GOF1, n = 100k, T = 200 | 0.059 | 0.065 | 0.062 | 0.058 | 0.057 | 0.056 | 0.059 | 0.060 | 0.059 |
| GOF2, n = 100k, T = 200 | 0.054 | 0.051 | 0.051 | 0.053 | 0.049 | 0.048 | 0.050 | 0.050 | 0.050 |
| GOF1, n = 100k, T = 500 | 0.061 | 0.062 | 0.061 | 0.063 | 0.059 | 0.058 | 0.059 | 0.061 | 0.060 |
| GOF2, n = 100k, T = 500 | 0.059 | 0.059 | 0.060 | 0.058 | 0.056 | 0.055 | 0.057 | 0.059 | 0.060 |
| GOF1, n = 200k, T = 100 | 0.082 | 0.081 | 0.083 | 0.081 | 0.074 | 0.076 | 0.077 | 0.073 | 0.075 |
| GOF2, n = 200k, T = 100 | 0.072 | 0.073 | 0.071 | 0.067 | 0.063 | 0.063 | 0.066 | 0.069 | 0.066 |
| GOF1, n = 200k, T = 200 | 0.082 | 0.084 | 0.084 | 0.086 | 0.084 | 0.084 | 0.087 | 0.086 | 0.094 |
| GOF2, n = 200k, T = 200 | 0.080 | 0.080 | 0.080 | 0.081 | 0.077 | 0.078 | 0.079 | 0.080 | 0.081 |
| GOF1, n = 200k, T = 500 | 0.066 | 0.064 | 0.066 | 0.066 | 0.063 | 0.063 | 0.064 | 0.064 | 0.067 |
| GOF2, n = 200k, T = 500 | 0.062 | 0.063 | 0.063 | 0.064 | 0.065 | 0.065 | 0.066 | 0.067 | 0.066 |

Table S107: Simulations with weak invalid IVs: in each cell, from top to bottom are empirical type-I error/power, mean( $\hat{\theta}$ ), SD( $\hat{\theta}$ ), mean( $SE(\hat{\theta})$ ) when  $h_y = 0.1$  and  $h_u = 0$ .

| Methods \ $\theta$     | -0.2                                    | -0.1                                    | -0.05                                   | 0                                       | 0.05                                   | 0.1                                    | 0.2                                    |
|------------------------|-----------------------------------------|-----------------------------------------|-----------------------------------------|-----------------------------------------|----------------------------------------|----------------------------------------|----------------------------------------|
| cML-MA-BIC             | 0.997,<br>-0.1943,<br>0.0330,<br>0.0145 | 0.974,<br>-0.0955,<br>0.0296,<br>0.0143 | 0.766,<br>-0.0468,<br>0.0273,<br>0.0142 | 0.228,<br>-0.0002,<br>0.0245,<br>0.0142 | 0.777,<br>0.0470,<br>0.0263,<br>0.0143 | 0.978,<br>0.0963,<br>0.0283,<br>0.0143 | 0.999,<br>0.1953,<br>0.0311,<br>0.0145 |
| cML-BIC                | 0.998,<br>-0.1956,<br>0.0333,<br>0.0131 | 0.982,<br>-0.0966,<br>0.0302,<br>0.0130 | 0.811,<br>-0.0474,<br>0.0284,<br>0.0129 | 0.299,<br>-0.0001,<br>0.0263,<br>0.0129 | 0.814,<br>0.0482,<br>0.0273,<br>0.0129 | 0.984,<br>0.0975,<br>0.0290,<br>0.0130 | 1.000,<br>0.1966,<br>0.0317,<br>0.0131 |
| cML-MA-BIC-DP, T = 100 | 0.952,<br>-0.1804,<br>0.0359,<br>0.0311 | 0.830,<br>-0.0872,<br>0.0275,<br>0.0266 | 0.454,<br>-0.0421,<br>0.0232,<br>0.0233 | 0.047,<br>0.0000,<br>0.0204,<br>0.0208  | 0.447,<br>0.0424,<br>0.0231,<br>0.0232 | 0.846,<br>0.0879,<br>0.0271,<br>0.0264 | 0.958,<br>0.1814,<br>0.0342,<br>0.0313 |
| cML-BIC-DP, T = 100    | 0.953,<br>-0.1809,<br>0.0362,<br>0.0303 | 0.833,<br>-0.0876,<br>0.0277,<br>0.0263 | 0.477,<br>-0.0423,<br>0.0234,<br>0.0230 | 0.050,<br>0.0000,<br>0.0208,<br>0.0206  | 0.455,<br>0.0427,<br>0.0233,<br>0.0230 | 0.851,<br>0.0885,<br>0.0272,<br>0.0259 | 0.960,<br>0.1824,<br>0.0339,<br>0.0305 |
| cML-MA-BIC-DP, T = 200 | 0.951,<br>-0.1800,<br>0.0361,<br>0.0314 | 0.833,<br>-0.0870,<br>0.0276,<br>0.0267 | 0.462,<br>-0.0421,<br>0.0232,<br>0.0234 | 0.046,<br>-0.0001,<br>0.0204,<br>0.0209 | 0.440,<br>0.0423,<br>0.0231,<br>0.0233 | 0.845,<br>0.0877,<br>0.0271,<br>0.0265 | 0.956,<br>0.1810,<br>0.0345,<br>0.0316 |
| cML-BIC-DP, T = 200    | 0.953,<br>-0.1807,<br>0.0360,<br>0.0307 | 0.835,<br>-0.0874,<br>0.0277,<br>0.0263 | 0.466,<br>-0.0423,<br>0.0235,<br>0.0231 | 0.052,<br>0.0000,<br>0.0208,<br>0.0207  | 0.450,<br>0.0426,<br>0.0233,<br>0.0230 | 0.850,<br>0.0882,<br>0.0273,<br>0.0262 | 0.960,<br>0.1820,<br>0.0343,<br>0.0309 |
| cML-MA-BIC-DP, T = 500 | 0.948,<br>-0.1797,<br>0.0363,<br>0.0317 | 0.829,<br>-0.0869,<br>0.0275,<br>0.0269 | 0.454,<br>-0.0420,<br>0.0231,<br>0.0235 | 0.042,<br>-0.0001,<br>0.0203,<br>0.0209 | 0.442,<br>0.0422,<br>0.0230,<br>0.0234 | 0.844,<br>0.0875,<br>0.0270,<br>0.0267 | 0.953,<br>0.1807,<br>0.0347,<br>0.0319 |
| cML-BIC-DP, T = 500    | 0.951,<br>-0.1804,<br>0.0361,<br>0.0311 | 0.836,<br>-0.0873,<br>0.0276,<br>0.0264 | 0.467,<br>-0.0422,<br>0.0233,<br>0.0232 | 0.048,<br>-0.0001,<br>0.0205,<br>0.0207 | 0.456,<br>0.0424,<br>0.0231,<br>0.0231 | 0.849,<br>0.0879,<br>0.0271,<br>0.0263 | 0.958,<br>0.1814,<br>0.0344,<br>0.0313 |
| MR-Mix                 | 0.984,<br>-0.2001,<br>0.0337,<br>0.0270 | 0.904,<br>-0.0995,<br>0.0346,<br>0.0262 | 0.574,<br>-0.0495,<br>0.0346,<br>0.0290 | 0.121,<br>0.0008,<br>0.0350,<br>0.0266  | 0.565,<br>0.0510,<br>0.0349,<br>0.0281 | 0.904,<br>0.1011,<br>0.0351,<br>0.0271 | 0.985,<br>0.2009,<br>0.0357,<br>0.0289 |
| MR-ContMix             | 0.999,<br>-0.1990,<br>0.0298,<br>NA     | 0.985,<br>-0.0993,<br>0.0297,<br>NA     | 0.829,<br>-0.0492,<br>0.0293,<br>NA     | 0.313,<br>0.0006,<br>0.0293,<br>NA      | 0.831,<br>0.0506,<br>0.0291,<br>NA     | 0.989,<br>0.1004,<br>0.0295,<br>NA     | 1.000,<br>0.1995,<br>0.0289,<br>NA     |
| MR-Lasso               | 1.000,<br>-0.1987,<br>0.0261,<br>0.0153 | 0.989,<br>-0.0992,<br>0.0254,<br>0.0153 | 0.806,<br>-0.0497,<br>0.0254,<br>0.0153 | 0.215,<br>0.0000,<br>0.0254,<br>0.0153  | 0.799,<br>0.0496,<br>0.0256,<br>0.0153 | 0.986,<br>0.0993,<br>0.0253,<br>0.0153 | 1.000,<br>0.1990,<br>0.0260,<br>0.0154 |
| MR-PRESSO              | 1.000,<br>-0.1994,<br>0.0312,<br>0.0182 | 0.967,<br>-0.0998,<br>0.0309,<br>0.0179 | 0.702,<br>-0.0498,<br>0.0306,<br>0.0178 | 0.201,<br>0.0000,<br>0.0305,<br>0.0178  | 0.688,<br>0.0497,<br>0.0305,<br>0.0179 | 0.968,<br>0.0995,<br>0.0306,<br>0.0179 | 1.000,<br>0.1990,<br>0.0306,<br>0.0182 |
| MR-IVW                 | 0.963,<br>-0.1998,<br>0.0499,<br>0.0502 | 0.533,<br>-0.1003,<br>0.0498,<br>0.0502 | 0.179,<br>-0.0506,<br>0.0498,<br>0.0501 | 0.054,<br>-0.0008,<br>0.0498,<br>0.0501 | 0.171,<br>0.0489,<br>0.0499,<br>0.0502 | 0.509,<br>0.0986,<br>0.0499,<br>0.0502 | 0.962,<br>0.1981,<br>0.0499,<br>0.0502 |
| MR-IVW-Oracle          | 1.000,<br>-0.1983,<br>0.0173,<br>0.0176 | 1.000,<br>-0.0988,<br>0.0171,<br>0.0175 | 0.804,<br>-0.0491,<br>0.0170,<br>0.0174 | 0.041,<br>0.0006,<br>0.0170,<br>0.0174  | 0.815,<br>0.0504,<br>0.0170,<br>0.0174 | 0.999,<br>0.1001,<br>0.0170,<br>0.0175 | 1.000,<br>0.1995,<br>0.0173,<br>0.0176 |
| MR-Egger               | 0.658,<br>-0.2008,<br>0.0841,<br>0.0844 | 0.234,<br>-0.1014,<br>0.0841,<br>0.0844 | 0.100,<br>-0.0517,<br>0.0842,<br>0.0844 | 0.053,<br>-0.0020,<br>0.0842,<br>0.0844 | 0.099,<br>0.0477,<br>0.0842,<br>0.0844 | 0.237,<br>0.0974,<br>0.0843,<br>0.0844 | 0.632,<br>0.1969,<br>0.0844,<br>0.0845 |
| MR-Weighted-Median     | 0.999,<br>-0.1928,<br>0.0309,<br>0.0204 | 0.959,<br>-0.0972,<br>0.0297,<br>0.0201 | 0.685,<br>-0.0494,<br>0.0294,<br>0.0200 | 0.140,<br>-0.0012,<br>0.0293,<br>0.0200 | 0.643,<br>0.0468,<br>0.0294,<br>0.0201 | 0.955,<br>0.0948,<br>0.0297,<br>0.0201 | 0.998,<br>0.1910,<br>0.0310,<br>0.0204 |
| MR-Weighted-Mode       | 0.718,<br>-0.1953,<br>0.1579,<br>1.0123 | 0.551,<br>-0.1038,<br>0.1629,<br>1.0020 | 0.323,<br>-0.0491,<br>0.1451,<br>1.0032 | 0.096,<br>-0.0066,<br>0.1448,<br>0.9972 | 0.325,<br>0.0438,<br>0.1440,<br>0.9936 | 0.561,<br>0.0911,<br>0.1528,<br>0.9987 | 0.720,<br>0.1857,<br>0.1560,<br>0.9929 |
| MR-RAPS1               | 0.965,<br>-0.2008,<br>0.0501,<br>0.0499 | 0.539,<br>-0.1008,<br>0.0501,<br>0.0499 | 0.186,<br>-0.0508,<br>0.0501,<br>0.0499 | 0.057,<br>-0.0009,<br>0.0501,<br>0.0499 | 0.177,<br>0.0491,<br>0.0501,<br>0.0499 | 0.517,<br>0.0991,<br>0.0501,<br>0.0499 | 0.964,<br>0.1991,<br>0.0502,<br>0.0500 |
| MR-RAPS2               | 0.985,<br>-0.2011,<br>0.0428,<br>0.0411 | 0.681,<br>-0.1007,<br>0.0430,<br>0.0410 | 0.299,<br>-0.0506,<br>0.0430,<br>0.0410 | 0.087,<br>-0.0006,<br>0.0431,<br>0.0410 | 0.289,<br>0.0494,<br>0.0429,<br>0.0411 | 0.655,<br>0.0994,<br>0.0429,<br>0.0412 | 0.985,<br>0.1996,<br>0.0432,<br>0.0413 |
| MR-RAPS3               | 1.000,<br>-0.2275,<br>0.0578,<br>0.0118 | 0.951,<br>-0.1148,<br>0.0579,<br>0.0117 | 0.821,<br>-0.0580,<br>0.0579,<br>0.0117 | 0.687,<br>-0.0010,<br>0.0578,<br>0.0117 | 0.806,<br>0.0560,<br>0.0578,<br>0.0117 | 0.948,<br>0.1128,<br>0.0577,<br>0.0117 | 1.000,<br>0.2256,<br>0.0575,<br>0.0118 |
| MR-RAPS4               | 0.999,<br>-0.2027,<br>0.0494,<br>0.0107 | 0.992,<br>-0.1008,<br>0.0371,<br>0.0105 | 0.898,<br>-0.0509,<br>0.0315,<br>0.0105 | 0.393,<br>0.0006,<br>0.0347,<br>0.0104  | 0.900,<br>0.0516,<br>0.0295,<br>0.0105 | 0.999,<br>0.1001,<br>0.0440,<br>0.0105 | 1.000,<br>0.2038,<br>0.0546,<br>0.0107 |

Table S108: Simulations with weak invalid IVs: in each cell, from top to bottom are empirical type-I error/power, mean( $\hat{\theta}$ ), SD( $\hat{\theta}$ ), mean( $SE(\hat{\theta})$ ) when  $h_y = 0.2$  and  $h_u = 0$ .

| Methods \ $\theta$     | -0.2                                    | -0.1                                    | -0.05                                   | 0                                       | 0.05                                   | 0.1                                    | 0.2                                    |
|------------------------|-----------------------------------------|-----------------------------------------|-----------------------------------------|-----------------------------------------|----------------------------------------|----------------------------------------|----------------------------------------|
| cML-MA-BIC             | 0.996,<br>-0.1952,<br>0.0320,<br>0.0151 | 0.980,<br>-0.0966,<br>0.0281,<br>0.0149 | 0.784,<br>-0.0477,<br>0.0260,<br>0.0149 | 0.196,<br>0.0000,<br>0.0243,<br>0.0148  | 0.784,<br>0.0480,<br>0.0257,<br>0.0149 | 0.978,<br>0.0975,<br>0.0273,<br>0.0150 | 0.997,<br>0.1963,<br>0.0301,<br>0.0151 |
| cML-BIC                | 0.999,<br>-0.1963,<br>0.0325,<br>0.0139 | 0.986,<br>-0.0974,<br>0.0290,<br>0.0137 | 0.816,<br>-0.0482,<br>0.0269,<br>0.0137 | 0.269,<br>-0.0001,<br>0.0259,<br>0.0136 | 0.823,<br>0.0488,<br>0.0267,<br>0.0137 | 0.983,<br>0.0984,<br>0.0281,<br>0.0137 | 0.997,<br>0.1973,<br>0.0309,<br>0.0139 |
| cML-MA-BIC-DP, T = 100 | 0.945,<br>-0.1810,<br>0.0355,<br>0.0315 | 0.840,<br>-0.0882,<br>0.0270,<br>0.0263 | 0.485,<br>-0.0430,<br>0.0228,<br>0.0230 | 0.042,<br>0.0000,<br>0.0203,<br>0.0206  | 0.484,<br>0.0432,<br>0.0226,<br>0.0229 | 0.849,<br>0.0891,<br>0.0260,<br>0.0261 | 0.941,<br>0.1816,<br>0.0349,<br>0.0320 |
| cML-BIC-DP, T = 100    | 0.947,<br>-0.1818,<br>0.0355,<br>0.0308 | 0.851,<br>-0.0886,<br>0.0272,<br>0.0259 | 0.497,<br>-0.0432,<br>0.0231,<br>0.0227 | 0.050,<br>0.0000,<br>0.0208,<br>0.0203  | 0.050,<br>0.0435,<br>0.0228,<br>0.0225 | 0.859,<br>0.0895,<br>0.0261,<br>0.0256 | 0.947,<br>0.1825,<br>0.0349,<br>0.0310 |
| cML-MA-BIC-DP, T = 200 | 0.943,<br>-0.1805,<br>0.0359,<br>0.0320 | 0.829,<br>-0.0879,<br>0.0271,<br>0.0266 | 0.472,<br>-0.0428,<br>0.0227,<br>0.0231 | 0.045,<br>0.0000,<br>0.0203,<br>0.0207  | 0.471,<br>0.0431,<br>0.0225,<br>0.0231 | 0.846,<br>0.0889,<br>0.0260,<br>0.0263 | 0.940,<br>0.1811,<br>0.0351,<br>0.0325 |
| cML-BIC-DP, T = 200    | 0.948,<br>-0.1813,<br>0.0358,<br>0.0312 | 0.832,<br>-0.0884,<br>0.0270,<br>0.0262 | 0.494,<br>-0.0431,<br>0.0229,<br>0.0228 | 0.054,<br>0.0000,<br>0.0205,<br>0.0205  | 0.490,<br>0.0433,<br>0.0226,<br>0.0228 | 0.850,<br>0.0894,<br>0.0261,<br>0.0259 | 0.944,<br>0.1820,<br>0.0347,<br>0.0316 |
| cML-MA-BIC-DP, T = 500 | 0.940,<br>-0.1803,<br>0.0360,<br>0.0322 | 0.827,<br>-0.0878,<br>0.0270,<br>0.0266 | 0.471,<br>-0.0428,<br>0.0227,<br>0.0231 | 0.039,<br>0.0000,<br>0.0202,<br>0.0207  | 0.474,<br>0.0430,<br>0.0224,<br>0.0231 | 0.848,<br>0.0888,<br>0.0259,<br>0.0264 | 0.940,<br>0.1810,<br>0.0351,<br>0.0326 |
| cML-BIC-DP, T = 500    | 0.947,<br>-0.1810,<br>0.0359,<br>0.0315 | 0.839,<br>-0.0882,<br>0.0271,<br>0.0262 | 0.490,<br>-0.0431,<br>0.0229,<br>0.0228 | 0.046,<br>0.0000,<br>0.0204,<br>0.0205  | 0.484,<br>0.0432,<br>0.0226,<br>0.0228 | 0.850,<br>0.0892,<br>0.0259,<br>0.0260 | 0.943,<br>0.1817,<br>0.0348,<br>0.0319 |
| MR-Mix                 | 0.986,<br>-0.1997,<br>0.0314,<br>0.0250 | 0.911,<br>-0.0997,<br>0.0301,<br>0.0258 | 0.598,<br>-0.0496,<br>0.0299,<br>0.0261 | 0.111,<br>0.0004,<br>0.0299,<br>0.0258  | 0.594,<br>0.0503,<br>0.0300,<br>0.1315 | 0.907,<br>0.1003,<br>0.0300,<br>0.0272 | 0.983,<br>0.2005,<br>0.0297,<br>0.0266 |
| MR-ContMix             | 1.000,<br>-0.1990,<br>0.0284,<br>NA     | 0.991,<br>-0.0993,<br>0.0276,<br>NA     | 0.840,<br>-0.0495,<br>0.0276,<br>NA     | 0.279,<br>0.0003,<br>0.0274,<br>NA      | 0.834,<br>0.0498,<br>0.0274,<br>NA     | 0.990,<br>0.0997,<br>0.0273,<br>NA     | 1.000,<br>0.1993,<br>0.0275,<br>NA     |
| MR-Lasso               | 1.000,<br>-0.1986,<br>0.0268,<br>0.0161 | 0.986,<br>-0.0992,<br>0.0265,<br>0.0161 | 0.803,<br>-0.0498,<br>0.0262,<br>0.0160 | 0.198,<br>-0.0001,<br>0.0265,<br>0.0160 | 0.796,<br>0.0499,<br>0.0261,<br>0.0160 | 0.979,<br>0.0995,<br>0.0264,<br>0.0161 | 1.000,<br>0.1991,<br>0.0273,<br>0.0162 |
| MR-PRESSO              | 0.994,<br>-0.1986,<br>0.0391,<br>0.0192 | 0.943,<br>-0.0992,<br>0.0388,<br>0.0189 | 0.686,<br>-0.0499,<br>0.0388,<br>0.0189 | 0.242,<br>-0.0003,<br>0.0389,<br>0.0189 | 0.671,<br>0.0494,<br>0.0387,<br>0.0189 | 0.933,<br>0.0991,<br>0.0387,<br>0.0190 | 0.998,<br>0.1986,<br>0.0390,<br>0.0193 |
| MR-IVW                 | 0.814,<br>-0.2000,<br>0.0695,<br>0.0702 | 0.301,<br>-0.1006,<br>0.0695,<br>0.0702 | 0.113,<br>-0.0508,<br>0.0695,<br>0.0702 | 0.048,<br>-0.0011,<br>0.0695,<br>0.0702 | 0.118,<br>0.0486,<br>0.0695,<br>0.0702 | 0.312,<br>0.0984,<br>0.0695,<br>0.0702 | 0.798,<br>0.1979,<br>0.0695,<br>0.0702 |
| MR-IVW-Oracle          | 1.000,<br>-0.1983,<br>0.0173,<br>0.0176 | 1.000,<br>-0.0988,<br>0.0171,<br>0.0175 | 0.804,<br>-0.0491,<br>0.0170,<br>0.0174 | 0.041,<br>0.0006,<br>0.0170,<br>0.0174  | 0.815,<br>0.0504,<br>0.0170,<br>0.0174 | 0.999,<br>0.1001,<br>0.0170,<br>0.0175 | 1.000,<br>0.1995,<br>0.0173,<br>0.0176 |
| MR-Egger               | 0.420,<br>-0.2013,<br>0.1176,<br>0.1181 | 0.149,<br>-0.1018,<br>0.1176,<br>0.1181 | 0.068,<br>-0.0521,<br>0.1177,<br>0.1181 | 0.051,<br>-0.0024,<br>0.1177,<br>0.1181 | 0.079,<br>0.0473,<br>0.1177,<br>0.1181 | 0.144,<br>0.0970,<br>0.1178,<br>0.1181 | 0.396,<br>0.1964,<br>0.1179,<br>0.1182 |
| MR-Weighted-Median     | 0.997,<br>-0.1906,<br>0.0342,<br>0.0213 | 0.942,<br>-0.0963,<br>0.0325,<br>0.0210 | 0.655,<br>-0.0489,<br>0.0325,<br>0.0209 | 0.135,<br>-0.0013,<br>0.0327,<br>0.0209 | 0.625,<br>0.0463,<br>0.0331,<br>0.0209 | 0.946,<br>0.0939,<br>0.0336,<br>0.0210 | 0.993,<br>0.1892,<br>0.0344,<br>0.0213 |
| MR-Weighted-Mode       | 0.672,<br>-0.1951,<br>0.1847,<br>1.3382 | 0.503,<br>-0.1026,<br>0.1823,<br>1.3283 | 0.278,<br>-0.0545,<br>0.1760,<br>1.3229 | 0.109,<br>-0.0033,<br>0.1779,<br>1.3167 | 0.285,<br>0.0438,<br>0.1903,<br>1.3139 | 0.511,<br>0.0892,<br>0.2169,<br>1.3198 | 0.676,<br>0.1770,<br>0.1952,<br>1.3048 |
| MR-RAPS1               | 0.820,<br>-0.2011,<br>0.0699,<br>0.0698 | 0.313,<br>-0.1011,<br>0.0699,<br>0.0698 | 0.117,<br>-0.0511,<br>0.0699,<br>0.0698 | 0.052,<br>-0.0011,<br>0.0699,<br>0.0698 | 0.121,<br>0.0489,<br>0.0699,<br>0.0698 | 0.314,<br>0.0989,<br>0.0699,<br>0.0698 | 0.805,<br>0.1989,<br>0.0699,<br>0.0699 |
| MR-RAPS2               | 0.902,<br>-0.2015,<br>0.0580,<br>0.0552 | 0.469,<br>-0.1014,<br>0.0582,<br>0.0550 | 0.248,<br>-0.0512,<br>0.0582,<br>0.0550 | 0.095,<br>-0.0013,<br>0.0582,<br>0.0552 | 0.237,<br>0.0466,<br>0.0898,<br>0.0551 | 0.459,<br>0.0988,<br>0.0584,<br>0.0550 | 0.886,<br>0.1995,<br>0.0585,<br>0.0555 |
| MR-RAPS3               | 0.994,<br>-0.2629,<br>0.0957,<br>0.0138 | 0.925,<br>-0.1339,<br>0.0964,<br>0.0138 | 0.838,<br>-0.0680,<br>0.0965,<br>0.0137 | 0.778,<br>-0.0017,<br>0.0963,<br>0.0137 | 0.808,<br>0.0647,<br>0.0959,<br>0.0138 | 0.920,<br>0.1307,<br>0.0954,<br>0.0138 | 1.000,<br>0.2600,<br>0.0943,<br>0.0138 |
| MR-RAPS4               | 1.000,<br>-0.2039,<br>0.0807,<br>0.0107 | 0.998,<br>-0.1016,<br>0.0322,<br>0.0105 | 0.907,<br>-0.0517,<br>0.0464,<br>0.0105 | 0.379,<br>-0.0004,<br>0.0454,<br>0.0104 | 0.903,<br>0.0508,<br>0.0392,<br>0.0105 | 0.999,<br>0.1016,<br>0.0437,<br>0.0105 | 1.000,<br>0.2049,<br>0.0944,<br>0.0108 |

Table S109: Simulations with weak invalid IVs: in each cell, from top to bottom are empirical type-I error/power, mean( $\hat{\theta}$ ), SD( $\hat{\theta}$ ), mean( $SE(\hat{\theta})$ ) when  $h_y = 0.4$  and  $h_u = 0$ .

| Methods \ $\theta$     | -0.2                                    | -0.1                                    | -0.05                                   | 0                                       | 0.05                                      | 0.1                                    | 0.2                                    |
|------------------------|-----------------------------------------|-----------------------------------------|-----------------------------------------|-----------------------------------------|-------------------------------------------|----------------------------------------|----------------------------------------|
| cML-MA-BIC             | 0.996,<br>-0.1960,<br>0.0311,<br>0.0157 | 0.983,<br>-0.0978,<br>0.0254,<br>0.0155 | 0.787,<br>-0.0485,<br>0.0240,<br>0.0155 | 0.153,<br>0.0000,<br>0.0227,<br>0.0154  | 0.795,<br>0.0486,<br>0.0238,<br>0.0154    | 0.985,<br>0.0982,<br>0.0248,<br>0.0155 | 0.998,<br>0.1978,<br>0.0268,<br>0.0156 |
| cML-BIC                | 0.998,<br>-0.1971,<br>0.0315,<br>0.0146 | 0.986,<br>-0.0987,<br>0.0261,<br>0.0144 | 0.810,<br>-0.0492,<br>0.0251,<br>0.0143 | 0.207,<br>0.0001,<br>0.0241,<br>0.0143  | 0.831,<br>0.0494,<br>0.0246,<br>0.0143    | 0.988,<br>0.0991,<br>0.0255,<br>0.0144 | 0.998,<br>0.1989,<br>0.0274,<br>0.0146 |
| cML-MA-BIC-DP, T = 100 | 0.950,<br>-0.1831,<br>0.0346,<br>0.0305 | 0.887,<br>-0.0902,<br>0.0249,<br>0.0250 | 0.512,<br>-0.0438,<br>0.0216,<br>0.0222 | 0.037,<br>0.0002,<br>0.0196,<br>0.0200  | 0.537,<br>0.0444,<br>0.0216,<br>0.0221    | 0.891,<br>0.0910,<br>0.0244,<br>0.0249 | 0.967,<br>0.1850,<br>0.0312,<br>0.0302 |
| cML-BIC-DP, T = 100    | 0.951,<br>-0.1839,<br>0.0342,<br>0.0296 | 0.890,<br>-0.0906,<br>0.0248,<br>0.0244 | 0.539,<br>-0.0440,<br>0.0217,<br>0.0218 | 0.045,<br>0.0002,<br>0.0197,<br>0.0196  | 0.550,<br>0.0447,<br>0.0218,<br>0.0216    | 0.898,<br>0.0915,<br>0.0244,<br>0.0243 | 0.969,<br>0.1858,<br>0.0311,<br>0.0293 |
| cML-MA-BIC-DP, T = 200 | 0.951,<br>-0.1826,<br>0.0351,<br>0.0310 | 0.882,<br>-0.0899,<br>0.0249,<br>0.0253 | 0.502,<br>-0.0437,<br>0.0215,<br>0.0225 | 0.032,<br>0.0002,<br>0.0195,<br>0.0202  | 0.528,<br>0.0442,<br>0.0216,<br>0.0223    | 0.891,<br>0.0908,<br>0.0244,<br>0.0251 | 0.963,<br>0.1845,<br>0.0313,<br>0.0308 |
| cML-BIC-DP, T = 200    | 0.950,<br>-0.1834,<br>0.0348,<br>0.0301 | 0.890,<br>-0.0903,<br>0.0250,<br>0.0249 | 0.524,<br>-0.0439,<br>0.0217,<br>0.0221 | 0.041,<br>0.0001,<br>0.0197,<br>0.0199  | 0.538,<br>0.0445,<br>0.0218,<br>0.0219    | 0.895,<br>0.0913,<br>0.0244,<br>0.0246 | 0.966,<br>0.1854,<br>0.0312,<br>0.0300 |
| cML-MA-BIC-DP, T = 500 | 0.950,<br>-0.1824,<br>0.0352,<br>0.0311 | 0.878,<br>-0.0899,<br>0.0249,<br>0.0253 | 0.507,<br>-0.0438,<br>0.0215,<br>0.0224 | 0.034,<br>0.0001,<br>0.0195,<br>0.0202  | 0.530,<br>0.0442,<br>0.0216,<br>0.0223    | 0.890,<br>0.0907,<br>0.0244,<br>0.0251 | 0.961,<br>0.1842,<br>0.0315,<br>0.0310 |
| cML-BIC-DP, T = 500    | 0.951,<br>-0.1832,<br>0.0351,<br>0.0304 | 0.888,<br>-0.0904,<br>0.0249,<br>0.0249 | 0.527,<br>-0.0441,<br>0.0215,<br>0.0221 | 0.036,<br>0.0001,<br>0.0196,<br>0.0199  | 0.540,<br>0.0443,<br>0.0217,<br>0.0219    | 0.892,<br>0.0910,<br>0.0244,<br>0.0247 | 0.965,<br>0.1850,<br>0.0313,<br>0.0303 |
| MR-Mix                 | 0.992,<br>-0.2004,<br>0.0269,<br>0.0257 | 0.930,<br>-0.1004,<br>0.0266,<br>0.0259 | 0.597,<br>-0.0503,<br>0.0266,<br>0.0260 | 0.094,<br>0.0000,<br>0.0263,<br>0.0813  | 0.602,<br>0.0500,<br>0.0266,<br>0.0274    | 0.929,<br>0.1001,<br>0.0265,<br>0.0263 | 0.989,<br>0.2005,<br>0.0272,<br>0.0255 |
| MR-ContMix             | 1.000,<br>-0.1991,<br>0.0257,<br>NA     | 0.993,<br>-0.0995,<br>0.0254,<br>NA     | 0.833,<br>-0.0494,<br>0.0256,<br>NA     | 0.255,<br>0.0002,<br>0.0258,<br>NA      | 0.850,<br>0.0500,<br>0.0258,<br>NA        | 0.992,<br>0.0998,<br>0.0258,<br>NA     | 1.000,<br>0.1994,<br>0.0261,<br>NA     |
| MR-Lasso               | 1.000,<br>-0.1989,<br>0.0271,<br>0.0168 | 0.985,<br>-0.0999,<br>0.0269,<br>0.0167 | 0.795,<br>-0.0502,<br>0.0267,<br>0.0166 | 0.168,<br>-0.0003,<br>0.0264,<br>0.0167 | 0.778,<br>0.0489,<br>0.0268,<br>0.0166    | 0.980,<br>0.0989,<br>0.0266,<br>0.0166 | 1.000,<br>0.1989,<br>0.0277,<br>0.0167 |
| MR-PRESSO              | 0.977,<br>-0.1985,<br>0.0550,<br>0.0207 | 0.901,<br>-0.0995,<br>0.0550,<br>0.0205 | 0.691,<br>-0.0499,<br>0.0550,<br>0.0205 | 0.285,<br>-0.0004,<br>0.0547,<br>0.0205 | 0.687,<br>0.0489,<br>0.0548,<br>0.0205    | 0.890,<br>0.0984,<br>0.0549,<br>0.0206 | 0.973,<br>0.1978,<br>0.0549,<br>0.0208 |
| MR-IVW                 | 0.548,<br>-0.2004,<br>0.0975,<br>0.0987 | 0.168,<br>-0.1009,<br>0.0975,<br>0.0987 | 0.085,<br>-0.0512,<br>0.0975,<br>0.0987 | 0.047,<br>-0.0014,<br>0.0975,<br>0.0987 | 0.081,<br>0.0483,<br>0.0975,<br>0.0987    | 0.179,<br>0.0980,<br>0.0975,<br>0.0987 | 0.523,<br>0.1975,<br>0.0975,<br>0.0987 |
| MR-IVW-Oracle          | 1.000,<br>-0.1983,<br>0.0173,<br>0.0176 | 1.000,<br>-0.0988,<br>0.0171,<br>0.0175 | 0.804,<br>-0.0491,<br>0.0170,<br>0.0174 | 0.041,<br>0.0006,<br>0.0170,<br>0.0174  | 0.815,<br>0.0504,<br>0.0170,<br>0.0174    | 0.999,<br>0.1001,<br>0.0170,<br>0.0175 | 1.000,<br>0.1995,<br>0.0173,<br>0.0176 |
| MR-Egger               | 0.238,<br>-0.2019,<br>0.1653,<br>0.1661 | 0.098,<br>-0.1025,<br>0.1654,<br>0.1661 | 0.053,<br>-0.0528,<br>0.1654,<br>0.1661 | 0.048,<br>-0.0031,<br>0.1655,<br>0.1661 | 0.067,<br>0.0466,<br>0.1655,<br>0.1661    | 0.102,<br>0.0964,<br>0.1655,<br>0.1661 | 0.242,<br>0.1958,<br>0.1656,<br>0.1661 |
| MR-Weighted-Median     | 0.991,<br>-0.1893,<br>0.0366,<br>0.0221 | 0.937,<br>-0.0955,<br>0.0342,<br>0.0218 | 0.630,<br>-0.0483,<br>0.0339,<br>0.0217 | 0.138,<br>-0.0011,<br>0.0339,<br>0.0216 | 0.606,<br>0.0460,<br>0.0349,<br>0.0216    | 0.935,<br>0.0932,<br>0.0358,<br>0.0217 | 0.990,<br>0.1876,<br>0.0380,<br>0.0221 |
| MR-Weighted-Mode       | 0.611,<br>-0.1957,<br>0.2474,<br>1.7626 | 0.433,<br>-0.1032,<br>0.2596,<br>1.7570 | 0.238,<br>-0.0531,<br>0.2733,<br>1.7426 | 0.116,<br>-0.0174,<br>0.2997,<br>1.7348 | 0.242,<br>0.0212,<br>0.2746,<br>1.7399    | 0.437,<br>0.0724,<br>0.2637,<br>1.7390 | 0.626,<br>0.1641,<br>0.2735,<br>1.7241 |
| MR-RAPS1               | 0.555,<br>-0.2014,<br>0.0980,<br>0.0982 | 0.181,<br>-0.1014,<br>0.0980,<br>0.0982 | 0.088,<br>-0.0514,<br>0.0980,<br>0.0982 | 0.053,<br>-0.0014,<br>0.0980,<br>0.0982 | 0.085,<br>0.0486,<br>0.0980,<br>0.0982    | 0.180,<br>0.0986,<br>0.0980,<br>0.0982 | 0.534,<br>0.1985,<br>0.0980,<br>0.0982 |
| MR-RAPS2               | 0.709,<br>-0.2033,<br>0.0945,<br>0.0757 | 0.348,<br>-0.1019,<br>0.0806,<br>0.0760 | 0.211,<br>-0.0529,<br>0.0834,<br>0.0756 | 0.094,<br>-0.0013,<br>0.0823,<br>0.0758 | 0.214,<br>0.0487,<br>0.0813,<br>0.0756    | 0.348,<br>0.1000,<br>0.0898,<br>0.0760 | 0.687,<br>0.1993,<br>0.0815,<br>0.0760 |
| MR-RAPS3               | 0.978,<br>-0.3806,<br>0.2224,<br>0.0220 | 0.916,<br>-0.2052,<br>0.2554,<br>0.0233 | 0.862,<br>-0.1165,<br>0.3253,<br>0.0334 | 0.842,<br>-0.0112,<br>0.3403,<br>0.0265 | 0.830,<br>-0.4931,<br>15.5916,<br>12.8425 | 0.911,<br>0.2063,<br>0.3738,<br>0.0321 | 0.975,<br>0.3540,<br>0.7622,<br>0.0580 |
| MR-RAPS4               | 1.000,<br>-0.2024,<br>0.1177,<br>0.0108 | 0.999,<br>-0.1026,<br>0.0472,<br>0.0105 | 0.917,<br>-0.0498,<br>0.0774,<br>0.0105 | 0.377,<br>0.0033,<br>0.1136,<br>0.0105  | 0.922,<br>0.0545,<br>0.0637,<br>0.0105    | 0.997,<br>0.1012,<br>0.0549,<br>0.0105 | 0.999,<br>0.2060,<br>0.1311,<br>0.0109 |



Table S110: Simulations with weak invalid IVs: in each cell, from top to bottom are empirical type-I error/power, mean( $\hat{\theta}$ ), SD( $\hat{\theta}$ ), mean(SE( $\hat{\theta}$ )) when  $h_y = 0.6$  and  $h_u = 0$ .

| Methods \ $\theta$     | -0.2                                    | -0.1                                    | -0.05                                     | 0                                       | 0.05                                   | 0.1                                        | 0.2                                    |
|------------------------|-----------------------------------------|-----------------------------------------|-------------------------------------------|-----------------------------------------|----------------------------------------|--------------------------------------------|----------------------------------------|
| cML-MA-BIC             | 0.996,<br>-0.1968,<br>0.0294,<br>0.0161 | 0.987,<br>-0.0982,<br>0.0242,<br>0.0157 | 0.792,<br>-0.0485,<br>0.0233,<br>0.0157   | 0.152,<br>0.0002,<br>0.0223,<br>0.0156  | 0.799,<br>0.0489,<br>0.0233,<br>0.0156 | 0.985,<br>0.0986,<br>0.0241,<br>0.0157     | 0.999,<br>0.1980,<br>0.0266,<br>0.0158 |
| cML-BIC                | 0.999,<br>-0.1977,<br>0.0295,<br>0.0149 | 0.992,<br>-0.0990,<br>0.0246,<br>0.0147 | 0.820,<br>-0.0491,<br>0.0238,<br>0.0146   | 0.185,<br>0.0001,<br>0.0233,<br>0.0146  | 0.827,<br>0.0495,<br>0.0238,<br>0.0146 | 0.992,<br>0.0993,<br>0.0245,<br>0.0147     | 0.999,<br>0.1986,<br>0.0272,<br>0.0149 |
| cML-MA-BIC-DP, T = 100 | 0.953,<br>-0.1853,<br>0.0324,<br>0.0291 | 0.900,<br>-0.0914,<br>0.0239,<br>0.0242 | 0.544,<br>-0.0444,<br>0.0211,<br>0.0217   | 0.029,<br>0.0002,<br>0.0192,<br>0.0197  | 0.575,<br>0.0450,<br>0.0212,<br>0.0215 | 0.913,<br>0.0922,<br>0.0236,<br>0.0239     | 0.965,<br>0.1871,<br>0.0297,<br>0.0285 |
| cML-BIC-DP, T = 100    | 0.959,<br>-0.1860,<br>0.0321,<br>0.0284 | 0.906,<br>-0.0918,<br>0.0240,<br>0.0237 | 0.559,<br>-0.0447,<br>0.0214,<br>0.0214   | 0.036,<br>0.0002,<br>0.0195,<br>0.0194  | 0.582,<br>0.0453,<br>0.0212,<br>0.0211 | 0.916,<br>0.0927,<br>0.0238,<br>0.0234     | 0.967,<br>0.1877,<br>0.0295,<br>0.0278 |
| cML-MA-BIC-DP, T = 200 | 0.953,<br>-0.1848,<br>0.0326,<br>0.0296 | 0.897,<br>-0.0911,<br>0.0238,<br>0.0245 | 0.530,<br>-0.0443,<br>0.0210,<br>0.0220   | 0.025,<br>0.0002,<br>0.0191,<br>0.0199  | 0.557,<br>0.0449,<br>0.0211,<br>0.0218 | 0.912,<br>0.0919,<br>0.0236,<br>0.0243     | 0.964,<br>0.1866,<br>0.0300,<br>0.0291 |
| cML-BIC-DP, T = 200    | 0.952,<br>-0.1855,<br>0.0326,<br>0.0289 | 0.900,<br>-0.0915,<br>0.0238,<br>0.0240 | 0.542,<br>-0.0445,<br>0.0212,<br>0.0216   | 0.032,<br>0.0002,<br>0.0193,<br>0.0196  | 0.565,<br>0.0451,<br>0.0213,<br>0.0214 | 0.912,<br>0.0923,<br>0.0237,<br>0.0238     | 0.966,<br>0.1871,<br>0.0301,<br>0.0283 |
| cML-MA-BIC-DP, T = 500 | 0.950,<br>-0.1847,<br>0.0327,<br>0.0297 | 0.900,<br>-0.0911,<br>0.0238,<br>0.0245 | 0.536,<br>-0.0443,<br>0.0210,<br>0.0219   | 0.025,<br>0.0002,<br>0.0191,<br>0.0198  | 0.560,<br>0.0448,<br>0.0211,<br>0.0218 | 0.913,<br>0.0919,<br>0.0237,<br>0.0242     | 0.965,<br>0.1864,<br>0.0301,<br>0.0293 |
| cML-BIC-DP, T = 500    | 0.952,<br>-0.1855,<br>0.0325,<br>0.0290 | 0.902,<br>-0.0914,<br>0.0238,<br>0.0240 | 0.548,<br>-0.0444,<br>0.0211,<br>0.0215   | 0.032,<br>0.0003,<br>0.0194,<br>0.0195  | 0.572,<br>0.0452,<br>0.0212,<br>0.0214 | 0.914,<br>0.0923,<br>0.0237,<br>0.0238     | 0.967,<br>0.1871,<br>0.0298,<br>0.0286 |
| MR-Mix                 | 0.990,<br>-0.2003,<br>0.0259,<br>0.0254 | 0.926,<br>-0.1001,<br>0.0260,<br>0.0244 | 0.619,<br>-0.0502,<br>0.0259,<br>0.0246   | 0.095,<br>0.0000,<br>0.0259,<br>0.0252  | 0.616,<br>0.0499,<br>0.0260,<br>0.0241 | 0.929,<br>0.0998,<br>0.0264,<br>0.0247     | 0.987,<br>0.1996,<br>0.0270,<br>0.0280 |
| MR-ContMix             | 1.000,<br>-0.1988,<br>0.0252,<br>NA     | 0.998,<br>-0.0995,<br>0.0248,<br>NA     | 0.827,<br>-0.0497,<br>0.0251,<br>NA       | 0.225,<br>0.0002,<br>0.0251,<br>NA      | 0.844,<br>0.0499,<br>0.0252,<br>NA     | 0.992,<br>0.0997,<br>0.0250,<br>NA         | 1.000,<br>0.1991,<br>0.0252,<br>NA     |
| MR-Lasso               | 0.999,<br>-0.1989,<br>0.0275,<br>0.0170 | 0.985,<br>-0.0994,<br>0.0268,<br>0.0170 | 0.781,<br>-0.0497,<br>0.0269,<br>0.0169   | 0.161,<br>-0.0001,<br>0.0270,<br>0.0169 | 0.777,<br>0.0496,<br>0.0272,<br>0.0169 | 0.982,<br>0.0993,<br>0.0268,<br>0.0170     | 1.000,<br>0.1984,<br>0.0273,<br>0.0171 |
| MR-PRESSO              | 0.965,<br>-0.1988,<br>0.0676,<br>0.0222 | 0.886,<br>-0.0997,<br>0.0677,<br>0.0220 | 0.694,<br>-0.0499,<br>0.0682,<br>0.0219   | 0.314,<br>-0.0004,<br>0.0685,<br>0.0219 | 0.682,<br>0.0491,<br>0.0688,<br>0.0220 | 0.878,<br>0.0986,<br>0.0689,<br>0.0221     | 0.958,<br>0.1980,<br>0.0697,<br>0.0224 |
| MR-IVW                 | 0.396,<br>-0.2006,<br>0.1190,<br>0.1206 | 0.135,<br>-0.1012,<br>0.1190,<br>0.1206 | 0.075,<br>-0.0514,<br>0.1190,<br>0.1206   | 0.048,<br>-0.0017,<br>0.1190,<br>0.1206 | 0.066,<br>0.0480,<br>0.1190,<br>0.1206 | 0.134,<br>0.0978,<br>0.1190,<br>0.1206     | 0.383,<br>0.1973,<br>0.1191,<br>0.1207 |
| MR-IVW-Oracle          | 1.000,<br>-0.1983,<br>0.0173,<br>0.0176 | 1.000,<br>-0.0988,<br>0.0171,<br>0.0175 | 0.804,<br>-0.0491,<br>0.0170,<br>0.0174   | 0.041,<br>0.0006,<br>0.0170,<br>0.0174  | 0.815,<br>0.0504,<br>0.0170,<br>0.0174 | 0.999,<br>0.1001,<br>0.0170,<br>0.0175     | 1.000,<br>0.1995,<br>0.0173,<br>0.0176 |
| MR-Egger               | 0.174,<br>-0.2024,<br>0.2021,<br>0.2030 | 0.076,<br>-0.1030,<br>0.2021,<br>0.2030 | 0.050,<br>-0.0533,<br>0.2022,<br>0.2030   | 0.046,<br>-0.0036,<br>0.2022,<br>0.2030 | 0.065,<br>0.0462,<br>0.2023,<br>0.2030 | 0.088,<br>0.0959,<br>0.2023,<br>0.2030     | 0.180,<br>0.1953,<br>0.2024,<br>0.2031 |
| MR-Weighted-Median     | 0.991,<br>-0.1889,<br>0.0377,<br>0.0225 | 0.939,<br>-0.0951,<br>0.0348,<br>0.0221 | 0.622,<br>-0.0480,<br>0.0345,<br>0.0220   | 0.136,<br>-0.0008,<br>0.0345,<br>0.0220 | 0.599,<br>0.0463,<br>0.0354,<br>0.0220 | 0.934,<br>0.0930,<br>0.0376,<br>0.0221     | 0.989,<br>0.1870,<br>0.0408,<br>0.0224 |
| MR-Weighted-Mode       | 0.579,<br>-0.1987,<br>0.3192,<br>2.0935 | 0.401,<br>-0.1091,<br>0.3490,<br>2.0830 | 0.218,<br>-0.0514,<br>0.3560,<br>2.0716   | 0.123,<br>-0.0277,<br>0.3437,<br>2.0523 | 0.208,<br>0.0177,<br>0.3348,<br>2.0355 | 0.390,<br>0.0654,<br>0.3432,<br>2.0462     | 0.584,<br>0.1556,<br>0.3505,<br>2.0312 |
| MR-RAPS1               | 0.400,<br>-0.2017,<br>0.1196,<br>0.1201 | 0.139,<br>-0.1017,<br>0.1196,<br>0.1201 | 0.079,<br>-0.0517,<br>0.1196,<br>0.1201   | 0.051,<br>-0.0017,<br>0.1197,<br>0.1201 | 0.069,<br>0.0483,<br>0.1197,<br>0.1201 | 0.137,<br>0.0983,<br>0.1197,<br>0.1201     | 0.390,<br>0.1983,<br>0.1197,<br>0.1201 |
| MR-RAPS2               | 0.576,<br>-0.2012,<br>0.1014,<br>0.0923 | 0.300,<br>-0.1017,<br>0.1009,<br>0.0921 | 0.179,<br>-0.0503,<br>0.1007,<br>0.0926   | 0.096,<br>-0.0021,<br>0.1060,<br>0.0922 | 0.191,<br>0.0499,<br>0.0996,<br>0.0928 | 0.282,<br>0.1002,<br>0.1182,<br>0.0927     | 0.558,<br>0.2006,<br>0.1152,<br>0.0918 |
| MR-RAPS3               | 0.966,<br>-0.7063,<br>1.9905,<br>0.2124 | 0.916,<br>-0.3195,<br>7.6792,<br>3.5350 | 0.871,<br>-1.1323,<br>19.2401,<br>20.4664 | 0.866,<br>-0.1304,<br>5.9349,<br>2.4806 | 0.860,<br>0.2791,<br>9.7956,<br>6.5607 | 0.914,<br>3.7189,<br>114.1616,<br>912.8000 | 0.963,<br>0.4145,<br>5.1670,<br>0.8545 |
| MR-RAPS4               | 1.000,<br>-0.2078,<br>0.1447,<br>0.0110 | 0.999,<br>-0.0994,<br>0.1253,<br>0.0107 | 0.917,<br>-0.0432,<br>0.1208,<br>0.0106   | 0.370,<br>0.0033,<br>0.1853,<br>0.0109  | 0.930,<br>0.0593,<br>0.1198,<br>0.0106 | 0.997,<br>0.1127,<br>0.1408,<br>0.0108     | 0.999,<br>0.2148,<br>0.1713,<br>0.0112 |

Table S111: Simulations with weak invalid IVs: in each cell, from top to bottom are empirical type-I error/power, mean( $\hat{\theta}$ ), SD( $\hat{\theta}$ ), mean(SE( $\hat{\theta}$ )) when  $h_y = 0.1$  and  $h_u = 0.1$ .

| Methods \ $\theta$     | -0.2                                    | -0.1                                    | -0.05                                   | 0                                       | 0.05                                   | 0.1                                    | 0.2                                    |
|------------------------|-----------------------------------------|-----------------------------------------|-----------------------------------------|-----------------------------------------|----------------------------------------|----------------------------------------|----------------------------------------|
| cML-MA-BIC             | 0.980,<br>-0.1857,<br>0.0415,<br>0.0150 | 0.961,<br>-0.0919,<br>0.0288,<br>0.0149 | 0.720,<br>-0.0440,<br>0.0259,<br>0.0147 | 0.230,<br>0.0028,<br>0.0240,<br>0.0147  | 0.799,<br>0.0507,<br>0.0256,<br>0.0148 | 0.988,<br>0.1001,<br>0.0270,<br>0.0148 | 0.998,<br>0.1998,<br>0.0283,<br>0.0150 |
| cML-MA-BIC-DP, T = 200 | 0.826,<br>-0.1615,<br>0.0467,<br>0.0404 | 0.746,<br>-0.0806,<br>0.0284,<br>0.0280 | 0.387,<br>-0.0384,<br>0.0227,<br>0.0231 | 0.043,<br>0.0032,<br>0.0202,<br>0.0206  | 0.532,<br>0.0467,<br>0.0229,<br>0.0228 | 0.895,<br>0.0935,<br>0.0259,<br>0.0253 | 0.980,<br>0.1898,<br>0.0302,<br>0.0282 |
| MR-Mix                 | 0.979,<br>-0.2005,<br>0.0286,<br>0.0269 | 0.914,<br>-0.1005,<br>0.0276,<br>0.0293 | 0.594,<br>-0.0502,<br>0.0275,<br>0.0267 | 0.117,<br>-0.0001,<br>0.0276,<br>0.0268 | 0.575,<br>0.0499,<br>0.0276,<br>0.0270 | 0.907,<br>0.0999,<br>0.0277,<br>0.0264 | 0.984,<br>0.2004,<br>0.0293,<br>0.0265 |
| MR-ContMix             | 0.999,<br>-0.1959,<br>0.0284,<br>NA     | 0.989,<br>-0.0960,<br>0.0283,<br>NA     | 0.803,<br>-0.0466,<br>0.0280,<br>NA     | 0.321,<br>0.0031,<br>0.0279,<br>NA      | 0.848,<br>0.0528,<br>0.0279,<br>NA     | 0.992,<br>0.1026,<br>0.0279,<br>NA     | 1.000,<br>0.2021,<br>0.0285,<br>NA     |
| MR-Lasso               | 0.986,<br>-0.1734,<br>0.0396,<br>0.0170 | 0.884,<br>-0.0743,<br>0.0390,<br>0.0169 | 0.560,<br>-0.0245,<br>0.0394,<br>0.0169 | 0.375,<br>0.0252,<br>0.0394,<br>0.0168  | 0.927,<br>0.0750,<br>0.0390,<br>0.0168 | 0.998,<br>0.1255,<br>0.0403,<br>0.0168 | 1.000,<br>0.2251,<br>0.0401,<br>0.0169 |
| MR-PRESSO              | 0.884,<br>-0.1360,<br>0.0597,<br>0.0220 | 0.613,<br>-0.0370,<br>0.0595,<br>0.0218 | 0.423,<br>0.0125,<br>0.0597,<br>0.0217  | 0.585,<br>0.0619,<br>0.0598,<br>0.0217  | 0.940,<br>0.1114,<br>0.0598,<br>0.0218 | 0.996,<br>0.1608,<br>0.0592,<br>0.0219 | 1.000,<br>0.2602,<br>0.0589,<br>0.0220 |
| MR-IVW                 | 0.312,<br>-0.0930,<br>0.0690,<br>0.0649 | 0.079,<br>0.0066,<br>0.0690,<br>0.0648  | 0.160,<br>0.0564,<br>0.0690,<br>0.0649  | 0.378,<br>0.1062,<br>0.0690,<br>0.0649  | 0.676,<br>0.1560,<br>0.0690,<br>0.0649 | 0.863,<br>0.2057,<br>0.0690,<br>0.0649 | 0.994,<br>0.3053,<br>0.0690,<br>0.0649 |
| MR-IVW-Oracle          | 1.000,<br>-0.1985,<br>0.0172,<br>0.0176 | 0.998,<br>-0.0989,<br>0.0169,<br>0.0175 | 0.818,<br>-0.0492,<br>0.0168,<br>0.0174 | 0.038,<br>0.0006,<br>0.0168,<br>0.0174  | 0.819,<br>0.0503,<br>0.0167,<br>0.0174 | 0.999,<br>0.1001,<br>0.0168,<br>0.0175 | 1.000,<br>0.1996,<br>0.0170,<br>0.0176 |
| MR-Egger               | 0.145,<br>-0.0862,<br>0.1164,<br>0.1091 | 0.076,<br>0.0135,<br>0.1163,<br>0.1091  | 0.115,<br>0.0633,<br>0.1163,<br>0.1091  | 0.206,<br>0.1131,<br>0.1163,<br>0.1091  | 0.350,<br>0.1629,<br>0.1163,<br>0.1091 | 0.502,<br>0.2127,<br>0.1162,<br>0.1091 | 0.790,<br>0.3124,<br>0.1162,<br>0.1092 |
| MR-Weighted-Median     | 0.918,<br>-0.1440,<br>0.0631,<br>0.0224 | 0.751,<br>-0.0535,<br>0.0569,<br>0.0221 | 0.409,<br>-0.0081,<br>0.0534,<br>0.0219 | 0.367,<br>0.0378,<br>0.0508,<br>0.0218  | 0.861,<br>0.0841,<br>0.0486,<br>0.0217 | 0.992,<br>0.1308,<br>0.0473,<br>0.0217 | 1.000,<br>0.2247,<br>0.0446,<br>0.0218 |
| MR-Weighted-Mode       | 0.635,<br>-0.1477,<br>0.2699,<br>0.8810 | 0.386,<br>-0.0612,<br>0.2838,<br>0.9130 | 0.229,<br>-0.0095,<br>0.2803,<br>0.9292 | 0.191,<br>0.0272,<br>0.2852,<br>0.9340  | 0.422,<br>0.0719,<br>0.2822,<br>0.9462 | 0.598,<br>0.1180,<br>0.2650,<br>0.9544 | 0.726,<br>0.2192,<br>0.2635,<br>0.9867 |
| MR-RAPS1               | 0.322,<br>-0.0934,<br>0.0693,<br>0.0645 | 0.081,<br>0.0066,<br>0.0693,<br>0.0645  | 0.169,<br>0.0566,<br>0.0693,<br>0.0645  | 0.383,<br>0.1067,<br>0.0693,<br>0.0645  | 0.684,<br>0.1567,<br>0.0693,<br>0.0645 | 0.867,<br>0.2067,<br>0.0693,<br>0.0645 | 0.994,<br>0.3068,<br>0.0693,<br>0.0646 |
| MR-RAPS2               | 0.563,<br>-0.1214,<br>0.0670,<br>0.0522 | 0.203,<br>-0.0201,<br>0.0719,<br>0.0522 | 0.226,<br>0.0285,<br>0.0792,<br>0.0522  | 0.354,<br>0.0798,<br>0.0705,<br>0.0522  | 0.690,<br>0.1302,<br>0.0712,<br>0.0522 | 0.901,<br>0.1785,<br>0.0778,<br>0.0521 | 0.995,<br>0.2807,<br>0.0703,<br>0.0525 |
| MR-RAPS3               | 0.919,<br>-0.1172,<br>0.0880,<br>0.0123 | 0.777,<br>0.0091,<br>0.0892,<br>0.0123  | 0.863,<br>0.0723,<br>0.0895,<br>0.0123  | 0.923,<br>0.1351,<br>0.0897,<br>0.0124  | 0.979,<br>0.1972,<br>0.0898,<br>0.0124 | 0.999,<br>0.2585,<br>0.0897,<br>0.0125 | 1.000,<br>0.3779,<br>0.0891,<br>0.0126 |
| MR-RAPS4               | 0.998,<br>-0.1898,<br>0.0823,<br>0.0101 | 0.996,<br>-0.0936,<br>0.0682,<br>0.0099 | 0.892,<br>-0.0243,<br>0.1124,<br>0.0099 | 0.444,<br>0.0153,<br>0.0904,<br>0.0099  | 0.926,<br>0.0577,<br>0.0458,<br>0.0099 | 0.998,<br>0.1061,<br>0.1458,<br>0.0120 | 1.000,<br>0.2433,<br>0.1837,<br>0.0104 |

Table S112: Simulations with weak invalid IVs: in each cell, from top to bottom are empirical type-I error/power, mean( $\hat{\theta}$ ), SD( $\hat{\theta}$ ), mean(SE( $\hat{\theta}$ )) when  $h_y = 0.2$  and  $h_u = 0.1$ .

| Methods \ $\theta$     | -0.2                                    | -0.1                                    | -0.05                                   | 0                                       | 0.05                                   | 0.1                                    | 0.2                                    |
|------------------------|-----------------------------------------|-----------------------------------------|-----------------------------------------|-----------------------------------------|----------------------------------------|----------------------------------------|----------------------------------------|
| cML-MA-BIC             | 0.990,<br>-0.1900,<br>0.0370,<br>0.0155 | 0.972,<br>-0.0944,<br>0.0276,<br>0.0153 | 0.746,<br>-0.0456,<br>0.0253,<br>0.0152 | 0.205,<br>0.0018,<br>0.0240,<br>0.0151  | 0.791,<br>0.0493,<br>0.0258,<br>0.0151 | 0.983,<br>0.0992,<br>0.0267,<br>0.0152 | 0.996,<br>0.1979,<br>0.0304,<br>0.0153 |
| cML-MA-BIC-DP, T = 200 | 0.878,<br>-0.1698,<br>0.0417,<br>0.0374 | 0.799,<br>-0.0839,<br>0.0276,<br>0.0273 | 0.427,<br>-0.0403,<br>0.0225,<br>0.0230 | 0.038,<br>0.0017,<br>0.0199,<br>0.0205  | 0.518,<br>0.0452,<br>0.0225,<br>0.0227 | 0.884,<br>0.0918,<br>0.0254,<br>0.0253 | 0.963,<br>0.1861,<br>0.0324,<br>0.0299 |
| MR-Mix                 | 0.987,<br>-0.2004,<br>0.0284,<br>0.0282 | 0.905,<br>-0.1002,<br>0.0281,<br>0.0280 | 0.578,<br>-0.0502,<br>0.0278,<br>0.0265 | 0.118,<br>-0.0002,<br>0.0278,<br>0.0267 | 0.589,<br>0.0500,<br>0.0281,<br>0.0264 | 0.913,<br>0.1003,<br>0.0284,<br>0.0258 | 0.988,<br>0.2003,<br>0.0288,<br>0.0265 |
| MR-ContMix             | 1.000,<br>-0.1969,<br>0.0278,<br>NA     | 0.987,<br>-0.0974,<br>0.0277,<br>NA     | 0.811,<br>-0.0476,<br>0.0274,<br>NA     | 0.280,<br>0.0022,<br>0.0275,<br>NA      | 0.850,<br>0.0517,<br>0.0274,<br>NA     | 0.990,<br>0.1013,<br>0.0276,<br>NA     | 0.999,<br>0.2005,<br>0.0277,<br>NA     |
| MR-Lasso               | 0.984,<br>-0.1780,<br>0.0395,<br>0.0173 | 0.891,<br>-0.0792,<br>0.0391,<br>0.0171 | 0.591,<br>-0.0291,<br>0.0385,<br>0.0171 | 0.327,<br>0.0210,<br>0.0396,<br>0.0171  | 0.895,<br>0.0710,<br>0.0397,<br>0.0171 | 0.995,<br>0.1206,<br>0.0401,<br>0.0171 | 1.000,<br>0.2202,<br>0.0404,<br>0.0172 |
| MR-PRESSO              | 0.861,<br>-0.1369,<br>0.0681,<br>0.0229 | 0.652,<br>-0.0382,<br>0.0671,<br>0.0228 | 0.436,<br>0.0113,<br>0.0672,<br>0.0227  | 0.551,<br>0.0606,<br>0.0668,<br>0.0227  | 0.918,<br>0.1104,<br>0.0668,<br>0.0228 | 0.993,<br>0.1601,<br>0.0666,<br>0.0228 | 0.999,<br>0.2588,<br>0.0661,<br>0.0230 |
| MR-IVW                 | 0.237,<br>-0.0931,<br>0.0846,<br>0.0798 | 0.070,<br>0.0065,<br>0.0845,<br>0.0798  | 0.130,<br>0.0563,<br>0.0845,<br>0.0798  | 0.284,<br>0.1061,<br>0.0845,<br>0.0798  | 0.284,<br>0.1559,<br>0.0845,<br>0.0798 | 0.506,<br>0.2057,<br>0.0845,<br>0.0798 | 0.729,<br>0.3053,<br>0.0846,<br>0.0798 |
| MR-IVW-Oracle          | 1.000,<br>-0.1985,<br>0.0172,<br>0.0176 | 0.998,<br>-0.0989,<br>0.0169,<br>0.0175 | 0.818,<br>-0.0492,<br>0.0168,<br>0.0174 | 0.038,<br>0.0006,<br>0.0168,<br>0.0174  | 0.819,<br>0.0503,<br>0.0167,<br>0.0174 | 0.999,<br>0.1001,<br>0.0168,<br>0.0175 | 1.000,<br>0.1996,<br>0.0170,<br>0.0176 |
| MR-Egger               | 0.120,<br>-0.0864,<br>0.1440,<br>0.1341 | 0.081,<br>0.0132,<br>0.1439,<br>0.1341  | 0.098,<br>0.0631,<br>0.1439,<br>0.1341  | 0.163,<br>0.1129,<br>0.1438,<br>0.1341  | 0.260,<br>0.1627,<br>0.1438,<br>0.1342 | 0.383,<br>0.2125,<br>0.1438,<br>0.1342 | 0.639,<br>0.3122,<br>0.1438,<br>0.1342 |
| MR-Weighted-Median     | 0.926,<br>-0.1508,<br>0.0647,<br>0.0228 | 0.774,<br>-0.0603,<br>0.0583,<br>0.0224 | 0.447,<br>-0.0145,<br>0.0550,<br>0.0222 | 0.342,<br>0.0315,<br>0.0527,<br>0.0221  | 0.822,<br>0.0776,<br>0.0514,<br>0.0220 | 0.981,<br>0.1239,<br>0.0498,<br>0.0219 | 0.999,<br>0.2173,<br>0.0469,<br>0.0220 |
| MR-Weighted-Mode       | 0.618,<br>-0.1636,<br>0.3395,<br>1.0469 | 0.367,<br>-0.0720,<br>0.3339,<br>1.0773 | 0.199,<br>-0.0274,<br>0.3384,<br>1.0939 | 0.173,<br>0.0231,<br>0.3240,<br>1.0998  | 0.355,<br>0.0761,<br>0.3268,<br>1.0959 | 0.549,<br>0.1206,<br>0.3301,<br>1.1169 | 0.693,<br>0.2167,<br>0.2906,<br>1.1571 |
| MR-RAPS1               | 0.244,<br>-0.0935,<br>0.0850,<br>0.0793 | 0.073,<br>0.0065,<br>0.0849,<br>0.0793  | 0.131,<br>0.0566,<br>0.0849,<br>0.0793  | 0.289,<br>0.1066,<br>0.0849,<br>0.0794  | 0.516,<br>0.1566,<br>0.0849,<br>0.0794 | 0.737,<br>0.2066,<br>0.0849,<br>0.0794 | 0.956,<br>0.3067,<br>0.0850,<br>0.0794 |
| MR-RAPS2               | 0.485,<br>-0.1517,<br>0.9320,<br>0.0629 | 0.213,<br>-0.0195,<br>0.0903,<br>0.0624 | 0.225,<br>0.0292,<br>0.0905,<br>0.0625  | 0.287,<br>0.0783,<br>0.0801,<br>0.0622  | 0.564,<br>0.1286,<br>0.0807,<br>0.0623 | 0.784,<br>0.1772,<br>0.0866,<br>0.0622 | 0.976,<br>0.2808,<br>0.0934,<br>0.0626 |
| MR-RAPS3               | 0.905,<br>-0.1358,<br>0.1288,<br>0.0146 | 0.804,<br>0.0111,<br>0.1307,<br>0.0146  | 0.865,<br>0.0848,<br>0.1309,<br>0.0146  | 0.917,<br>0.1575,<br>0.1308,<br>0.0146  | 0.972,<br>0.2287,<br>0.1304,<br>0.0146 | 0.988,<br>0.2977,<br>0.1296,<br>0.0146 | 0.998,<br>0.4291,<br>0.1271,<br>0.0146 |
| MR-RAPS4               | 0.998,<br>-0.1966,<br>0.0621,<br>0.0101 | 0.996,<br>-0.0931,<br>0.0782,<br>0.0100 | 0.910,<br>-0.0358,<br>0.1117,<br>0.0099 | 0.425,<br>0.0149,<br>0.1100,<br>0.0099  | 0.931,<br>0.0570,<br>0.0712,<br>0.0099 | 0.998,<br>0.1048,<br>0.0512,<br>0.0099 | 1.000,<br>0.2364,<br>0.1993,<br>0.0104 |

Table S113: Simulations with weak invalid IVs: in each cell, from top to bottom are empirical type-I error/power, mean( $\hat{\theta}$ ), SD( $\hat{\theta}$ ), mean(SE( $\hat{\theta}$ )) when  $h_y = 0.4$  and  $h_u = 0.1$ .

| Methods \ $\theta$     | -0.2                                    | -0.1                                    | -0.05                                   | 0                                      | 0.05                                   | 0.1                                    | 0.2                                    |
|------------------------|-----------------------------------------|-----------------------------------------|-----------------------------------------|----------------------------------------|----------------------------------------|----------------------------------------|----------------------------------------|
| cML-MA-BIC             | 0.995,<br>-0.1937,<br>0.0289,<br>0.0156 | 0.979,<br>-0.0953,<br>0.0258,<br>0.0155 | 0.767,<br>-0.0466,<br>0.0235,<br>0.0155 | 0.173,<br>0.0018,<br>0.0225,<br>0.0155 | 0.799,<br>0.0499,<br>0.0238,<br>0.0155 | 0.982,<br>0.0995,<br>0.0251,<br>0.0156 | 0.999,<br>0.1986,<br>0.0289,<br>0.0157 |
| cML-MA-BIC-DP, T = 200 | 0.920,<br>-0.1772,<br>0.0361,<br>0.0337 | 0.850,<br>-0.0870,<br>0.0257,<br>0.0259 | 0.473,<br>-0.0420,<br>0.0214,<br>0.0222 | 0.035,<br>0.0014,<br>0.0191,<br>0.0200 | 0.527,<br>0.0454,<br>0.0213,<br>0.0221 | 0.904,<br>0.0921,<br>0.0245,<br>0.0246 | 0.968,<br>0.1865,<br>0.0313,<br>0.0292 |
| MR-Mix                 | 0.990,<br>-0.1990,<br>0.0263,<br>0.0256 | 0.922,<br>-0.0988,<br>0.0257,<br>0.0254 | 0.573,<br>-0.0485,<br>0.0259,<br>0.0269 | 0.102,<br>0.0016,<br>0.0259,<br>0.0251 | 0.615,<br>0.0516,<br>0.0265,<br>0.0248 | 0.929,<br>0.1016,<br>0.0264,<br>0.0258 | 0.991,<br>0.2017,<br>0.0268,<br>0.0259 |
| MR-ContMix             | 1.000,<br>-0.1978,<br>0.0249,<br>NA     | 0.993,<br>-0.0984,<br>0.0248,<br>NA     | 0.818,<br>-0.0487,<br>0.0250,<br>NA     | 0.260,<br>0.0012,<br>0.0251,<br>NA     | 0.855,<br>0.0510,<br>0.0252,<br>NA     | 0.990,<br>0.1008,<br>0.0254,<br>NA     | 1.000,<br>0.2002,<br>0.0258,<br>NA     |
| MR-Lasso               | 0.988,<br>-0.1827,<br>0.0390,<br>0.0175 | 0.916,<br>-0.0838,<br>0.0383,<br>0.0174 | 0.636,<br>-0.0341,<br>0.0386,<br>0.0174 | 0.260,<br>0.0154,<br>0.0382,<br>0.0174 | 0.865,<br>0.0651,<br>0.0379,<br>0.0174 | 0.993,<br>0.1147,<br>0.0381,<br>0.0175 | 1.000,<br>0.2145,<br>0.0394,<br>0.0175 |
| MR-PRESSO              | 0.856,<br>-0.1394,<br>0.0800,<br>0.0242 | 0.670,<br>-0.0409,<br>0.0791,<br>0.0242 | 0.484,<br>0.0088,<br>0.0793,<br>0.0242  | 0.520,<br>0.0585,<br>0.0789,<br>0.0242 | 0.879,<br>0.1080,<br>0.0786,<br>0.0242 | 0.980,<br>0.1574,<br>0.0783,<br>0.0242 | 0.996,<br>0.2567,<br>0.0784,<br>0.0244 |
| MR-IVW                 | 0.171,<br>-0.0932,<br>0.1091,<br>0.1033 | 0.066,<br>0.0064,<br>0.1091,<br>0.1033  | 0.106,<br>0.0562,<br>0.1091,<br>0.1033  | 0.200,<br>0.1060,<br>0.1091,<br>0.1033 | 0.349,<br>0.1558,<br>0.1091,<br>0.1033 | 0.521,<br>0.2056,<br>0.1091,<br>0.1034 | 0.822,<br>0.3051,<br>0.1091,<br>0.1034 |
| MR-IVW-Oracle          | 1.000,<br>-0.1985,<br>0.0172,<br>0.0176 | 0.998,<br>-0.0989,<br>0.0169,<br>0.0175 | 0.818,<br>-0.0492,<br>0.0168,<br>0.0174 | 0.038,<br>0.0006,<br>0.0168,<br>0.0174 | 0.819,<br>0.0503,<br>0.0167,<br>0.0174 | 0.999,<br>0.1001,<br>0.0168,<br>0.0175 | 1.000,<br>0.1996,<br>0.0170,<br>0.0176 |
| MR-Egger               | 0.101,<br>-0.0867,<br>0.1873,<br>0.1737 | 0.083,<br>0.0129,<br>0.1872,<br>0.1737  | 0.087,<br>0.0628,<br>0.1872,<br>0.1737  | 0.124,<br>0.1126,<br>0.1872,<br>0.1737 | 0.195,<br>0.1624,<br>0.1872,<br>0.1737 | 0.267,<br>0.2122,<br>0.1871,<br>0.1738 | 0.454,<br>0.3119,<br>0.1871,<br>0.1738 |
| MR-Weighted-Median     | 0.941,<br>-0.1571,<br>0.0675,<br>0.0233 | 0.828,<br>-0.0680,<br>0.0580,<br>0.0227 | 0.448,<br>-0.0227,<br>0.0541,<br>0.0225 | 0.271,<br>0.0232,<br>0.0519,<br>0.0223 | 0.773,<br>0.0690,<br>0.0491,<br>0.0222 | 0.964,<br>0.1153,<br>0.0483,<br>0.0222 | 0.997,<br>0.2085,<br>0.0472,<br>0.0224 |
| MR-Weighted-Mode       | 0.575,<br>-0.1704,<br>0.3591,<br>1.3495 | 0.366,<br>-0.0765,<br>0.3536,<br>1.3530 | 0.212,<br>-0.0339,<br>0.3342,<br>1.3557 | 0.166,<br>0.0095,<br>0.3400,<br>1.3582 | 0.299,<br>0.0551,<br>0.3489,<br>1.3552 | 0.473,<br>0.0983,<br>0.3429,<br>1.3698 | 0.645,<br>0.1921,<br>0.3487,<br>1.4165 |
| MR-RAPS1               | 0.173,<br>-0.0936,<br>0.1096,<br>0.1028 | 0.070,<br>0.0064,<br>0.1096,<br>0.1028  | 0.110,<br>0.0564,<br>0.1096,<br>0.1028  | 0.205,<br>0.1065,<br>0.1096,<br>0.1028 | 0.356,<br>0.1565,<br>0.1096,<br>0.1028 | 0.528,<br>0.2065,<br>0.1096,<br>0.1028 | 0.826,<br>0.3066,<br>0.1096,<br>0.1028 |
| MR-RAPS2               | 0.377,<br>-0.1229,<br>0.1006,<br>0.0803 | 0.210,<br>-0.0263,<br>0.1735,<br>0.0803 | 0.198,<br>0.0274,<br>0.1032,<br>0.0803  | 0.224,<br>0.0791,<br>0.0998,<br>0.0802 | 0.422,<br>0.1310,<br>0.1038,<br>0.0806 | 0.618,<br>0.1811,<br>0.1115,<br>0.0799 | 0.879,<br>0.2850,<br>0.1348,<br>0.0805 |
| MR-RAPS3               | 0.909,<br>-0.1952,<br>0.4104,<br>0.0433 | 0.834,<br>-0.0018,<br>0.5471,<br>0.0522 | 0.886,<br>0.1124,<br>0.6015,<br>0.0421  | 0.922,<br>0.2390,<br>1.0189,<br>0.5774 | 0.949,<br>0.3844,<br>1.3282,<br>0.1987 | 0.978,<br>0.4322,<br>0.2918,<br>0.0241 | 0.997,<br>0.5802,<br>0.2460,<br>0.0211 |
| MR-RAPS4               | 1.000,<br>-0.1990,<br>0.1049,<br>0.0103 | 0.998,<br>-0.0883,<br>0.1092,<br>0.0100 | 0.918,<br>-0.0338,<br>0.1397,<br>0.0100 | 0.415,<br>0.0277,<br>0.1423,<br>0.0100 | 0.952,<br>0.0657,<br>0.1178,<br>0.0100 | 0.998,<br>0.1060,<br>0.0979,<br>0.0100 | 1.000,<br>0.2256,<br>0.1793,<br>0.0104 |

Table S114: Simulations with weak invalid IVs: in each cell, from top to bottom are empirical type-I error/power, mean( $\hat{\theta}$ ), SD( $\hat{\theta}$ ), mean(SE( $\hat{\theta}$ )) when  $h_y = 0.6$  and  $h_u = 0.1$ .

| Methods \ $\theta$     | -0.2                                    | -0.1                                      | -0.05                                   | 0                                        | 0.05                                   | 0.1                                    | 0.2                                    |
|------------------------|-----------------------------------------|-------------------------------------------|-----------------------------------------|------------------------------------------|----------------------------------------|----------------------------------------|----------------------------------------|
| cML-MA-BIC             | 0.996,<br>-0.1956,<br>0.0284,<br>0.0159 | 0.988,<br>-0.0970,<br>0.0238,<br>0.0156   | 0.784,<br>-0.0474,<br>0.0226,<br>0.0156 | 0.165,<br>0.0012,<br>0.0217,<br>0.0156   | 0.794,<br>0.0497,<br>0.0227,<br>0.0156 | 0.994,<br>0.0993,<br>0.0233,<br>0.0157 | 0.997,<br>0.1986,<br>0.0264,<br>0.0158 |
| cML-MA-BIC-DP, T = 200 | 0.942,<br>-0.1814,<br>0.0346,<br>0.0314 | 0.886,<br>-0.0894,<br>0.0244,<br>0.0249   | 0.509,<br>-0.0433,<br>0.0210,<br>0.0218 | 0.037,<br>0.0007,<br>0.0188,<br>0.0196   | 0.533,<br>0.0451,<br>0.0209,<br>0.0217 | 0.904,<br>0.0920,<br>0.0237,<br>0.0242 | 0.959,<br>0.1864,<br>0.0309,<br>0.0286 |
| MR-Mix                 | 0.991,<br>-0.1991,<br>0.0253,<br>0.0255 | 0.930,<br>-0.0988,<br>0.0247,<br>0.0245   | 0.583,<br>-0.0486,<br>0.0249,<br>0.0243 | 0.087,<br>0.0016,<br>0.0247,<br>0.0366   | 0.620,<br>0.0515,<br>0.0246,<br>0.0239 | 0.933,<br>0.1015,<br>0.0248,<br>0.0243 | 0.991,<br>0.2017,<br>0.0252,<br>0.0250 |
| MR-ContMix             | 0.999,<br>-0.1977,<br>0.0243,<br>NA     | 0.998,<br>-0.0981,<br>0.0238,<br>NA       | 0.829,<br>-0.0482,<br>0.0236,<br>NA     | 0.252,<br>0.0015,<br>0.0235,<br>NA       | 0.835,<br>0.0513,<br>0.0234,<br>NA     | 1.000,<br>0.1010,<br>0.0236,<br>NA     | 1.000,<br>0.2005,<br>0.0238,<br>NA     |
| MR-Lasso               | 0.987,<br>-0.1863,<br>0.0384,<br>0.0177 | 0.929,<br>-0.0871,<br>0.0377,<br>0.0176   | 0.676,<br>-0.0372,<br>0.0373,<br>0.0176 | 0.221,<br>0.0126,<br>0.0380,<br>0.0176   | 0.835,<br>0.0626,<br>0.0378,<br>0.0177 | 0.993,<br>0.1126,<br>0.0378,<br>0.0177 | 1.000,<br>0.2118,<br>0.0377,<br>0.0178 |
| MR-PRESSO              | 0.830,<br>-0.1379,<br>0.0932,<br>0.0259 | 0.696,<br>-0.0393,<br>0.0925,<br>0.0256   | 0.528,<br>0.0105,<br>0.0928,<br>0.0256  | 0.511,<br>0.0597,<br>0.0923,<br>0.0257   | 0.844,<br>0.1087,<br>0.0918,<br>0.0257 | 0.969,<br>0.1577,<br>0.0906,<br>0.0256 | 0.991,<br>0.2561,<br>0.0894,<br>0.0258 |
| MR-IVW                 | 0.140,<br>-0.0933,<br>0.1289,<br>0.1224 | 0.067,<br>0.0063,<br>0.1289,<br>0.1224    | 0.088,<br>0.0561,<br>0.1289,<br>0.1224  | 0.159,<br>0.1059,<br>0.1289,<br>0.1225   | 0.271,<br>0.1557,<br>0.1289,<br>0.1225 | 0.415,<br>0.2055,<br>0.1289,<br>0.1225 | 0.705,<br>0.3051,<br>0.1290,<br>0.1225 |
| MR-IVW-Oracle          | 1.000,<br>-0.1985,<br>0.0172,<br>0.0176 | 0.998,<br>-0.0989,<br>0.0169,<br>0.0175   | 0.818,<br>-0.0492,<br>0.0168,<br>0.0174 | 0.038,<br>0.0006,<br>0.0168,<br>0.0174   | 0.819,<br>0.0503,<br>0.0167,<br>0.0174 | 0.999,<br>0.1001,<br>0.0168,<br>0.0175 | 1.000,<br>0.1996,<br>0.0170,<br>0.0176 |
| MR-Egger               | 0.095,<br>-0.0869,<br>0.2223,<br>0.2058 | 0.076,<br>0.0127,<br>0.2223,<br>0.2058    | 0.081,<br>0.0625,<br>0.2223,<br>0.2058  | 0.110,<br>0.1124,<br>0.2222,<br>0.2058   | 0.155,<br>0.1622,<br>0.2222,<br>0.2059 | 0.220,<br>0.2120,<br>0.2222,<br>0.2059 | 0.348,<br>0.3116,<br>0.2222,<br>0.2059 |
| MR-Weighted-Median     | 0.945,<br>-0.1619,<br>0.0686,<br>0.0236 | 0.844,<br>-0.0728,<br>0.0583,<br>0.0229   | 0.485,<br>-0.0273,<br>0.0555,<br>0.0227 | 0.245,<br>0.0183,<br>0.0534,<br>0.0225   | 0.739,<br>0.0645,<br>0.0519,<br>0.0224 | 0.954,<br>0.1105,<br>0.0493,<br>0.0224 | 0.993,<br>0.2036,<br>0.0484,<br>0.0226 |
| MR-Weighted-Mode       | 0.550,<br>-0.1718,<br>0.4068,<br>1.5883 | 0.339,<br>-0.0669,<br>0.4114,<br>1.6090   | 0.200,<br>-0.0152,<br>0.4135,<br>1.6105 | 0.160,<br>0.0234,<br>0.4037,<br>1.6022   | 0.290,<br>0.0710,<br>0.3903,<br>1.5991 | 0.440,<br>0.1162,<br>0.3854,<br>1.6165 | 0.627,<br>0.2027,<br>0.3928,<br>1.6543 |
| MR-RAPS1               | 0.147,<br>-0.0937,<br>0.1296,<br>0.1218 | 0.069,<br>0.0063,<br>0.1296,<br>0.1218    | 0.091,<br>0.0564,<br>0.1296,<br>0.1218  | 0.163,<br>0.1064,<br>0.1296,<br>0.1218   | 0.279,<br>0.1564,<br>0.1296,<br>0.1218 | 0.423,<br>0.2064,<br>0.1296,<br>0.1218 | 0.707,<br>0.3065,<br>0.1296,<br>0.1218 |
| MR-RAPS2               | 0.332,<br>-0.1226,<br>0.1175,<br>0.0949 | 0.204,<br>-0.0244,<br>0.1195,<br>0.0945   | 0.176,<br>0.0264,<br>0.1152,<br>0.0947  | 0.190,<br>0.0782,<br>0.1199,<br>0.0947   | 0.348,<br>0.1285,<br>0.1298,<br>0.0944 | 0.503,<br>0.1791,<br>0.1255,<br>0.0950 | 0.783,<br>0.2809,<br>0.1351,<br>0.0948 |
| MR-RAPS3               | 0.906,<br>-0.4046,<br>4.5092,<br>2.0607 | 0.857,<br>2.3722,<br>74.5197,<br>769.0805 | 0.898,<br>0.3082,<br>4.0494,<br>0.8431  | 0.918,<br>1.6598,<br>39.1988,<br>36.9932 | 0.947,<br>0.4372,<br>4.3331,<br>0.9291 | 0.958,<br>0.5583,<br>5.8561,<br>1.4798 | 0.992,<br>0.8442,<br>0.5724,<br>0.0473 |
| MR-RAPS4               | 1.000,<br>-0.2004,<br>0.1303,<br>0.0105 | 0.998,<br>-0.0789,<br>0.1614,<br>0.0102   | 0.926,<br>-0.0140,<br>0.1828,<br>0.0102 | 0.480,<br>0.0309,<br>0.2152,<br>0.0103   | 0.944,<br>0.0873,<br>0.2288,<br>0.0104 | 1.000,<br>0.1306,<br>0.2075,<br>0.0104 | 0.999,<br>0.2198,<br>0.1919,<br>0.0106 |

Table S115: Relative frequencies of goodness-of-fit tests' rejecting the null at  $p$ -value cutoff 0.05 when  $h_y = 0.1$  and  $h_u = 0$ .

| Methods \ $\theta$ | -0.2  | -0.1  | -0.05 | 0     | 0.05  | 0.1   | 0.2   |
|--------------------|-------|-------|-------|-------|-------|-------|-------|
| GOF1, T = 100      | 0.941 | 0.950 | 0.946 | 0.898 | 0.942 | 0.952 | 0.949 |
| GOF2, T = 100      | 0.965 | 0.958 | 0.954 | 0.906 | 0.948 | 0.958 | 0.966 |
| GOF1, T = 200      | 0.976 | 0.987 | 0.986 | 0.967 | 0.981 | 0.984 | 0.981 |
| GOF2, T = 200      | 0.987 | 0.988 | 0.989 | 0.969 | 0.983 | 0.989 | 0.990 |
| GOF1, T = 500      | 0.998 | 0.998 | 0.999 | 0.996 | 1.000 | 1.000 | 0.999 |
| GOF2, T = 500      | 0.999 | 0.999 | 0.999 | 0.997 | 1.000 | 1.000 | 0.999 |

Table S116: Relative frequencies of goodness-of-fit tests' rejecting the null at  $p$ -value cutoff 0.05 when  $h_y = 0.2$  and  $h_u = 0$ .

| Methods \ $\theta$ | -0.2  | -0.1  | -0.05 | 0     | 0.05  | 0.1   | 0.2   |
|--------------------|-------|-------|-------|-------|-------|-------|-------|
| GOF1, T = 100      | 0.915 | 0.926 | 0.915 | 0.819 | 0.906 | 0.919 | 0.901 |
| GOF2, T = 100      | 0.935 | 0.936 | 0.921 | 0.833 | 0.909 | 0.934 | 0.941 |
| GOF1, T = 200      | 0.971 | 0.982 | 0.980 | 0.947 | 0.973 | 0.977 | 0.965 |
| GOF2, T = 200      | 0.981 | 0.985 | 0.982 | 0.953 | 0.971 | 0.978 | 0.984 |
| GOF1, T = 500      | 0.995 | 0.996 | 0.994 | 0.977 | 0.987 | 0.992 | 0.992 |
| GOF2, T = 500      | 0.996 | 0.997 | 0.994 | 0.979 | 0.987 | 0.992 | 0.995 |

Table S117: Relative frequencies of goodness-of-fit tests' rejecting the null at  $p$ -value cutoff 0.05 when  $h_y = 0.4$  and  $h_u = 0$ .

| Methods \ $\theta$ | -0.2  | -0.1  | -0.05 | 0     | 0.05  | 0.1   | 0.2   |
|--------------------|-------|-------|-------|-------|-------|-------|-------|
| GOF1, T = 100      | 0.817 | 0.829 | 0.804 | 0.669 | 0.810 | 0.840 | 0.819 |
| GOF2, T = 100      | 0.867 | 0.847 | 0.813 | 0.697 | 0.821 | 0.864 | 0.876 |
| GOF1, T = 200      | 0.912 | 0.929 | 0.916 | 0.846 | 0.917 | 0.929 | 0.930 |
| GOF2, T = 200      | 0.929 | 0.930 | 0.917 | 0.867 | 0.928 | 0.942 | 0.954 |
| GOF1, T = 500      | 0.976 | 0.975 | 0.969 | 0.940 | 0.975 | 0.977 | 0.979 |
| GOF2, T = 500      | 0.979 | 0.976 | 0.972 | 0.946 | 0.976 | 0.982 | 0.983 |

Table S118: Relative frequencies of goodness-of-fit tests' rejecting the null at  $p$ -value cutoff 0.05 when  $h_y = 0.6$  and  $h_u = 0$ .

| Methods \ $\theta$ | -0.2  | -0.1  | -0.05 | 0     | 0.05  | 0.1   | 0.2   |
|--------------------|-------|-------|-------|-------|-------|-------|-------|
| GOF1, T = 100      | 0.746 | 0.766 | 0.731 | 0.579 | 0.737 | 0.764 | 0.756 |
| GOF2, T = 100      | 0.809 | 0.795 | 0.735 | 0.595 | 0.754 | 0.786 | 0.808 |
| GOF1, T = 200      | 0.872 | 0.885 | 0.867 | 0.764 | 0.874 | 0.889 | 0.878 |
| GOF2, T = 200      | 0.900 | 0.904 | 0.878 | 0.787 | 0.881 | 0.901 | 0.909 |
| GOF1, T = 500      | 0.944 | 0.948 | 0.942 | 0.900 | 0.942 | 0.960 | 0.952 |
| GOF2, T = 500      | 0.955 | 0.952 | 0.945 | 0.902 | 0.947 | 0.963 | 0.964 |

Table S119: Relative frequencies of goodness-of-fit tests' rejecting the null at  $p$ -value cutoff 0.05 with  $T = 200$  when  $h_u = 0.1$ .

| Methods \ $\theta$ | -0.2  | -0.1  | -0.05 | 0     | 0.05  | 0.1   | 0.2   |
|--------------------|-------|-------|-------|-------|-------|-------|-------|
| GOF1, $h_y = 0.1$  | 0.983 | 0.989 | 0.982 | 0.939 | 0.976 | 0.978 | 0.973 |
| GOF2, $h_y = 0.1$  | 0.995 | 0.991 | 0.981 | 0.947 | 0.978 | 0.979 | 0.980 |
| GOF1, $h_y = 0.2$  | 0.955 | 0.969 | 0.958 | 0.887 | 0.941 | 0.943 | 0.938 |
| GOF2, $h_y = 0.2$  | 0.980 | 0.976 | 0.965 | 0.898 | 0.947 | 0.953 | 0.956 |
| GOF1, $h_y = 0.4$  | 0.915 | 0.923 | 0.902 | 0.815 | 0.887 | 0.901 | 0.893 |
| GOF2, $h_y = 0.4$  | 0.949 | 0.940 | 0.911 | 0.828 | 0.899 | 0.922 | 0.922 |
| GOF1, $h_y = 0.6$  | 0.887 | 0.886 | 0.854 | 0.758 | 0.840 | 0.869 | 0.851 |
| GOF2, $h_y = 0.6$  | 0.906 | 0.898 | 0.862 | 0.771 | 0.852 | 0.891 | 0.885 |

Table S120: Simulation results with valid and weaker IVs and  $h_y = 0.2$ ,  $h_u = 0$ .

| Methods \ $\theta$     | -0.2                                    | -0.1                                    | -0.05                                   | 0                                      | 0.05                                   | 0.1                                    | 0.2                                    |
|------------------------|-----------------------------------------|-----------------------------------------|-----------------------------------------|----------------------------------------|----------------------------------------|----------------------------------------|----------------------------------------|
| cML-MA-BIC             | 1.000,<br>-0.1991,<br>0.0176,<br>0.0171 | 1.000,<br>-0.0992,<br>0.0173,<br>0.0169 | 0.823,<br>-0.0492,<br>0.0173,<br>0.0168 | 0.054,<br>0.0007,<br>0.0171,<br>0.0168 | 0.828,<br>0.0504,<br>0.0173,<br>0.0168 | 0.998,<br>0.1004,<br>0.0174,<br>0.0169 | 1.000,<br>0.2004,<br>0.0176,<br>0.0171 |
| cML-BIC                | 1.000,<br>-0.1993,<br>0.0177,<br>0.0169 | 0.999,<br>-0.0993,<br>0.0175,<br>0.0166 | 0.835,<br>-0.0493,<br>0.0174,<br>0.0165 | 0.057,<br>0.0006,<br>0.0173,<br>0.0165 | 0.835,<br>0.0506,<br>0.0174,<br>0.0165 | 0.999,<br>0.1005,<br>0.0174,<br>0.0166 | 1.000,<br>0.2005,<br>0.0177,<br>0.0168 |
| cML-MA-BIC-DP, T = 200 | 1.000,<br>-0.1965,<br>0.0176,<br>0.0195 | 0.996,<br>-0.0969,<br>0.0175,<br>0.0192 | 0.698,<br>-0.0472,<br>0.0172,<br>0.0190 | 0.027,<br>0.0007,<br>0.0163,<br>0.0182 | 0.733,<br>0.0487,<br>0.0172,<br>0.0189 | 0.996,<br>0.0984,<br>0.0174,<br>0.0191 | 1.000,<br>0.1980,<br>0.0176,<br>0.0193 |
| cML-BIC-DP, T = 200    | 1.000,<br>-0.1968,<br>0.0179,<br>0.0190 | 0.997,<br>-0.0972,<br>0.0176,<br>0.0189 | 0.712,<br>-0.0474,<br>0.0174,<br>0.0187 | 0.034,<br>0.0007,<br>0.0165,<br>0.0180 | 0.750,<br>0.0489,<br>0.0174,<br>0.0185 | 0.994,<br>0.0987,<br>0.0176,<br>0.0187 | 1.000,<br>0.1983,<br>0.0177,<br>0.0188 |
| GOF1, T = 200          | 0.063                                   | 0.066                                   | 0.065                                   | 0.054                                  | 0.062                                  | 0.065                                  | 0.057                                  |
| GOF2, T = 200          | 0.059                                   | 0.06                                    | 0.061                                   | 0.053                                  | 0.056                                  | 0.056                                  | 0.051                                  |

Table S121: Comparison of computational times (in seconds) of different MR methods as averaged over 10 simulations for  $m$  IVs.

| Methods \ $m$                 | 10      | 20      | 50       | 70       | 100     |
|-------------------------------|---------|---------|----------|----------|---------|
| cML-MA-BIC, 0 Random Start    | 0.0151  | 0.0272  | 0.0964   | 0.1548   | 0.2282  |
| cML-MA-BIC, 5 Random Start    | 0.2237  | 0.6305  | 1.7965   | 2.7234   | 4.0821  |
| cML-MA-BIC-DP, 0 Random Start | 1.5327  | 3.0729  | 10.9926  | 15.803   | 24.9949 |
| cML-MA-BIC-DP, 5 Random Start | 18.5582 | 53.7983 | 170.9803 | 267.4588 | 408.589 |
| MR-Mix                        | 3.6973  | 4.667   | 6.1285   | 6.7372   | 7.6673  |
| MR-ContMix                    | 0.1198  | 0.1327  | 0.1695   | 0.2237   | 0.2388  |
| MR-Lasso                      | 0.0386  | 0.041   | 0.0536   | 0.0582   | 0.0673  |
| MR-PRESSO                     | 3.4478  | 5.5814  | 11.6707  | 15.9898  | 22.4874 |
| MR-IVW                        | 0.0012  | 0.001   | 0.0011   | 0.0011   | 0.001   |
| MR-Egger                      | 0.0012  | 0.0016  | 0.0014   | 0.0017   | 0.0013  |
| MR-Weighted-Median            | 0.0489  | 0.0531  | 0.0582   | 0.0632   | 0.0697  |
| MR-Weighted-Mode              | 2.3047  | 2.2967  | 2.3596   | 2.3546   | 2.3933  |
| MR-RAPS                       | 0.0809  | 0.1237  | 0.1035   | 0.2068   | 0.1276  |

# Supplemental Methods and Results

## S1 Proof of Theorem 1

**Theorem 1.** *With Assumptions 1 and 2 satisfied, if  $K_0 \in \mathcal{K}$ , we have  $P(\hat{K} = K_0) \rightarrow 1$  and  $P(\hat{B}_{\hat{K}} = B_0) \rightarrow 1$  as  $n_1, n_2 \rightarrow \infty$ .*

*Proof.* First, we show  $P(\hat{B}_{K_0} = B_0) \rightarrow 1$ , which is equivalent to show for any  $B_1 \subseteq \{1, \dots, m\}$  such that  $|B_1| = K_0$  and  $B_1 \neq B_0$ ,  $P(\hat{B}_{K_0} = B_1) \rightarrow 0$  as  $n_1, n_2 \rightarrow \infty$ . We have

$$\begin{aligned} P(\hat{B}_{K_0} = B_1) &\leq P\left(\min_{\tilde{\theta}, \tilde{b}_{Xi}} \sum_{i \in B_1^c} \left( \frac{(\hat{\beta}_{Xi} - \tilde{b}_{Xi})^2}{\hat{\sigma}_{Xi}^2} + \frac{(\hat{\beta}_{Yi} - \tilde{\theta} \tilde{b}_{Xi})^2}{\hat{\sigma}_{Yi}^2} \right) \leq \min_{\tilde{\theta}, \tilde{b}_{Xi}} \sum_{i \in B_0^c} \left( \frac{(\hat{\beta}_{Xi} - \tilde{b}_{Xi})^2}{\hat{\sigma}_{Xi}^2} + \frac{(\hat{\beta}_{Yi} - \tilde{\theta} \tilde{b}_{Xi})^2}{\hat{\sigma}_{Yi}^2} \right)\right) \\ &\leq P\left(\min_{\tilde{\theta}, \tilde{b}_{Xi}} \sum_{i \in B_1^c} \left( \frac{(\hat{\beta}_{Xi} - \tilde{b}_{Xi})^2}{\hat{\sigma}_{Xi}^2} + \frac{(\hat{\beta}_{Yi} - \tilde{\theta} \tilde{b}_{Xi})^2}{\hat{\sigma}_{Yi}^2} \right) \leq \sum_{i \in B_0^c} \left( \frac{(\hat{\beta}_{Xi} - \beta_{Xi})^2}{\hat{\sigma}_{Xi}^2} + \frac{(\hat{\beta}_{Yi} - \theta \beta_{Xi})^2}{\hat{\sigma}_{Yi}^2} \right)\right). \end{aligned}$$

Note that, for  $i \in B_0^c$ ,  $\frac{\hat{\beta}_{Xi} - \beta_{Xi}}{\hat{\sigma}_{Xi}} \sim N(0, 1)$  and  $\frac{\hat{\beta}_{Yi} - \theta \beta_{Xi}}{\hat{\sigma}_{Yi}} \sim N(0, 1)$ . So for any  $\varepsilon > 0$ , there exists  $C > 0$  such that

$$P\left(\sum_{i \in B_0^c} \left( \frac{(\hat{\beta}_{Xi} - \beta_{Xi})^2}{\hat{\sigma}_{Xi}^2} + \frac{(\hat{\beta}_{Yi} - \theta \beta_{Xi})^2}{\hat{\sigma}_{Yi}^2} \right) > C\right) < \frac{\varepsilon}{2}. \quad (1)$$

And we have

$$\begin{aligned} P\left(\min_{\tilde{\theta}, \tilde{b}_{Xi}} \sum_{i \in B_1^c} \left( \frac{(\hat{\beta}_{Xi} - \tilde{b}_{Xi})^2}{\hat{\sigma}_{Xi}^2} + \frac{(\hat{\beta}_{Yi} - \tilde{\theta} \tilde{b}_{Xi})^2}{\hat{\sigma}_{Yi}^2} \right) \leq \sum_{i \in B_0^c} \left( \frac{(\hat{\beta}_{Xi} - \beta_{Xi})^2}{\hat{\sigma}_{Xi}^2} + \frac{(\hat{\beta}_{Yi} - \theta \beta_{Xi})^2}{\hat{\sigma}_{Yi}^2} \right)\right) \\ \leq P\left(\min_{\tilde{\theta}, \tilde{b}_{Xi}} \sum_{i \in B_1^c} \left( \frac{(\hat{\beta}_{Xi} - \tilde{b}_{Xi})^2}{\hat{\sigma}_{Xi}^2} + \frac{(\hat{\beta}_{Yi} - \tilde{\theta} \tilde{b}_{Xi})^2}{\hat{\sigma}_{Yi}^2} \right) \leq C\right) + P\left(\sum_{i \in B_0^c} \left( \frac{(\hat{\beta}_{Xi} - \beta_{Xi})^2}{\hat{\sigma}_{Xi}^2} + \frac{(\hat{\beta}_{Yi} - \theta \beta_{Xi})^2}{\hat{\sigma}_{Yi}^2} \right) > C\right). \end{aligned}$$

After profiling out  $\tilde{b}_{Xi}$ 's, we get

$$\min_{\tilde{\theta}, \tilde{b}_{Xi}} \sum_{i \in B_1^c} \left( \frac{(\hat{\beta}_{Xi} - \tilde{b}_{Xi})^2}{\hat{\sigma}_{Xi}^2} + \frac{(\hat{\beta}_{Yi} - \tilde{\theta} \tilde{b}_{Xi})^2}{\hat{\sigma}_{Yi}^2} \right) = \min_{\tilde{\theta}} \sum_{i \in B_1^c} \frac{(\hat{\beta}_{Yi} - \tilde{\theta} \cdot \hat{\beta}_{Xi})^2}{\hat{\sigma}_{Yi}^2 + \tilde{\theta}^2 \hat{\sigma}_{Xi}^2},$$

so

$$\begin{aligned} P\left(\min_{\tilde{\theta}, \tilde{b}_{Xi}} \sum_{i \in B_1^c} \left( \frac{(\hat{\beta}_{Xi} - \tilde{b}_{Xi})^2}{\hat{\sigma}_{Xi}^2} + \frac{(\hat{\beta}_{Yi} - \tilde{\theta} \tilde{b}_{Xi})^2}{\hat{\sigma}_{Yi}^2} \right) \leq C\right) \\ = P\left(\min_{\tilde{\theta}} \sum_{i \in B_1^c} \frac{(\hat{\beta}_{Yi} - \tilde{\theta} \cdot \hat{\beta}_{Xi})^2}{\hat{\sigma}_{Yi}^2 + \tilde{\theta}^2 \hat{\sigma}_{Xi}^2} \leq C\right). \end{aligned}$$

We have  $\frac{\hat{\beta}_{Yi} - \tilde{\theta} \cdot \hat{\beta}_{Xi}}{\sqrt{\hat{\sigma}_{Yi}^2 + \tilde{\theta}^2 \hat{\sigma}_{Xi}^2}} \sim N\left(\frac{\theta \cdot \beta_{Xi} + r_i - \tilde{\theta} \cdot \beta_{Xi}}{\sqrt{\hat{\sigma}_{Yi}^2 + \tilde{\theta}^2 \hat{\sigma}_{Xi}^2}}, 1\right)$ , so  $\sum_{i \in B_1^c} \frac{(\hat{\beta}_{Yi} - \tilde{\theta} \cdot \hat{\beta}_{Xi})^2}{\hat{\sigma}_{Yi}^2 + \tilde{\theta}^2 \hat{\sigma}_{Xi}^2}$  follows non-central  $\chi^2$  distribution with degrees of freedom  $(m - K_0)$  and non-centrality parameter  $\lambda_{\tilde{\theta}}$  depending on  $\tilde{\theta}$

$$\lambda_{\tilde{\theta}} = \sum_{i \in B_1^c} \frac{(\theta \cdot \beta_{Xi} + r_i - \tilde{\theta} \cdot \beta_{Xi})^2}{\hat{\sigma}_{Yi}^2 + \tilde{\theta}^2 \hat{\sigma}_{Xi}^2}.$$

With Assumption 2, we get

$$\lambda_{\tilde{\theta}} \geq \sum_{i \in B_1^c} \frac{(\theta \cdot \beta_{Xi} + r_i - \tilde{\theta} \cdot \beta_{Xi})^2}{\frac{u_Y}{n_2} + \tilde{\theta}^2 \cdot \frac{u_X}{l_n \cdot n_2}} = n_2 \cdot \sum_{i \in B_1^c} \frac{(\theta \cdot \beta_{Xi} + r_i - \tilde{\theta} \cdot \beta_{Xi})^2}{u_Y + \tilde{\theta}^2 \cdot \frac{u_X}{l_n}}.$$



With Assumption 1, we know

$$\min_{\tilde{\theta}} \sum_{i \in B_1^c} \frac{(\theta \cdot \beta_{Xi} + r_i - \tilde{\theta} \cdot \beta_{Xi})^2}{u_Y + \tilde{\theta}^2 \cdot \frac{u_X}{l_n}} = v > 0,$$

here  $v$  is a constant. This is because, with Assumption 1, there is no  $\tilde{\theta}$  making  $\theta \cdot \beta_{Xi} + r_i - \tilde{\theta} \cdot \beta_{Xi} = 0$  for all  $i \in B_1^c$  simultaneously. So we have  $\min_{\tilde{\theta}} \lambda_{\tilde{\theta}} \geq n_2 \cdot v$ . Then as  $n_2$  large enough, we have

$$P\left(\min_{\tilde{\theta}} \sum_{i \in B_1^c} \frac{(\hat{\beta}_{Yi} - \tilde{\theta} \cdot \hat{\beta}_{Xi})^2}{\hat{\sigma}_{Yi}^2 + \tilde{\theta}^2 \hat{\sigma}_{Xi}^2} \leq C\right) \leq \frac{\varepsilon}{2}. \quad (2)$$

Combining (1) and (2), we get  $P(\hat{B}_{K_0} = B_0) \rightarrow 1$  as  $n_1, n_2 \rightarrow \infty$ .

Next, we show  $P(\hat{K} = K_0) \rightarrow 1$ . For any  $K_1 < K_0$ , we have

$$\begin{aligned} P(\hat{K} = K_1) &\leq P(\text{BIC}(K_1) \leq \text{BIC}(K_0)) \\ &= P(-2 \cdot L(\hat{\theta}(K_1), \hat{b}_{Xi}(K_1), \hat{r}_i(K_1)) + \log(n) \cdot K_1 \leq -2 \cdot L(\hat{\theta}(K_0), \hat{b}_{Xi}(K_0), \hat{r}_i(K_0)) + \log(n) \cdot K_0) \\ &= P(2 \cdot L(\hat{\theta}(K_0), \hat{b}_{Xi}(K_0), \hat{r}_i(K_0)) - 2 \cdot L(\hat{\theta}(K_1), \hat{b}_{Xi}(K_1), \hat{r}_i(K_1)) \leq \log(n)(K_0 - K_1)). \end{aligned}$$

As we have shown  $P(\hat{B}_{K_0} = B_0) \rightarrow 1$ , with probability goes to 1 we have

$$\begin{aligned} &2 \cdot L(\hat{\theta}(K_0), \hat{b}_{Xi}(K_0), \hat{r}_i(K_0)) - 2 \cdot L(\hat{\theta}(K_1), \hat{b}_{Xi}(K_1), \hat{r}_i(K_1)) \\ &= \min_{\tilde{\theta}, \tilde{b}_{Xi}} \sum_{i \in \hat{B}_{K_1}^c} \left( \frac{(\hat{\beta}_{Xi} - \tilde{b}_{Xi})^2}{\hat{\sigma}_{Xi}^2} + \frac{(\hat{\beta}_{Yi} - \tilde{\theta} \tilde{b}_{Xi})^2}{\hat{\sigma}_{Yi}^2} \right) - \min_{\tilde{\theta}, \tilde{b}_{Xi}} \sum_{i \in B_0^c} \left( \frac{(\hat{\beta}_{Xi} - \tilde{b}_{Xi})^2}{\hat{\sigma}_{Xi}^2} + \frac{(\hat{\beta}_{Yi} - \tilde{\theta} \tilde{b}_{Xi})^2}{\hat{\sigma}_{Yi}^2} \right) \\ &\geq \min_{\tilde{\theta}, \tilde{b}_{Xi}} \sum_{i \in \hat{B}_{K_1}^c} \left( \frac{(\hat{\beta}_{Xi} - \tilde{b}_{Xi})^2}{\hat{\sigma}_{Xi}^2} + \frac{(\hat{\beta}_{Yi} - \tilde{\theta} \tilde{b}_{Xi})^2}{\hat{\sigma}_{Yi}^2} \right) - \sum_{i \in B_0^c} \left( \frac{(\hat{\beta}_{Xi} - \beta_{Xi})^2}{\hat{\sigma}_{Xi}^2} + \frac{(\hat{\beta}_{Yi} - \theta \beta_{Xi})^2}{\hat{\sigma}_{Yi}^2} \right). \end{aligned}$$

Then we get

$$\begin{aligned} &P(\hat{K} = K_1) \\ &\leq P\left(\min_{\tilde{\theta}, \tilde{b}_{Xi}} \sum_{i \in \hat{B}_{K_1}^c} \left( \frac{(\hat{\beta}_{Xi} - \tilde{b}_{Xi})^2}{\hat{\sigma}_{Xi}^2} + \frac{(\hat{\beta}_{Yi} - \tilde{\theta} \tilde{b}_{Xi})^2}{\hat{\sigma}_{Yi}^2} \right) \leq \sum_{i \in B_0^c} \left( \frac{(\hat{\beta}_{Xi} - \beta_{Xi})^2}{\hat{\sigma}_{Xi}^2} + \frac{(\hat{\beta}_{Yi} - \theta \beta_{Xi})^2}{\hat{\sigma}_{Yi}^2} \right) + \log(n)(K_0 - K_1)\right) \\ &\leq \sum_{|B|=K_1} P\left(\min_{\tilde{\theta}, \tilde{b}_{Xi}} \sum_{i \in B^c} \left( \frac{(\hat{\beta}_{Xi} - \tilde{b}_{Xi})^2}{\hat{\sigma}_{Xi}^2} + \frac{(\hat{\beta}_{Yi} - \tilde{\theta} \tilde{b}_{Xi})^2}{\hat{\sigma}_{Yi}^2} \right) \leq \sum_{i \in B_0^c} \left( \frac{(\hat{\beta}_{Xi} - \beta_{Xi})^2}{\hat{\sigma}_{Xi}^2} + \frac{(\hat{\beta}_{Yi} - \theta \beta_{Xi})^2}{\hat{\sigma}_{Yi}^2} \right) + \log(n)(K_0 - K_1)\right) \end{aligned}$$

Similar as above, we get

$$\min_{\tilde{\theta}, \tilde{b}_{Xi}} \sum_{i \in B^c} \left( \frac{(\hat{\beta}_{Xi} - \tilde{b}_{Xi})^2}{\hat{\sigma}_{Xi}^2} + \frac{(\hat{\beta}_{Yi} - \tilde{\theta} \tilde{b}_{Xi})^2}{\hat{\sigma}_{Yi}^2} \right) = \min_{\tilde{\theta}} \sum_{i \in B^c} \frac{(\hat{\beta}_{Yi} - \tilde{\theta} \cdot \hat{\beta}_{Xi})^2}{\hat{\sigma}_{Yi}^2 + \tilde{\theta}^2 \hat{\sigma}_{Xi}^2},$$

and  $\sum_{i \in B^c} \frac{(\hat{\beta}_{Yi} - \tilde{\theta} \cdot \hat{\beta}_{Xi})^2}{\hat{\sigma}_{Yi}^2 + \tilde{\theta}^2 \hat{\sigma}_{Xi}^2}$  follows non-central  $\chi^2$  distribution with degrees of freedom  $(m - K_1)$  and non-centrality parameter  $\lambda_{\tilde{\theta}}$  depending on  $\tilde{\theta}$

$$\lambda_{\tilde{\theta}} = \sum_{i \in B^c} \frac{(\theta \cdot \beta_{Xi} + r_i - \tilde{\theta} \cdot \beta_{Xi})^2}{\hat{\sigma}_{Yi}^2 + \tilde{\theta}^2 \hat{\sigma}_{Xi}^2}.$$

Similarly, since  $K_1 < K_0$ , with Assumption 2 we have  $\lambda_{\hat{\theta}} \geq n_2 \cdot \nu$  for some constant  $\nu$ , so for any  $|B| = K_1$ , we get

$$P\left(\min_{\hat{\theta}, \tilde{b}_{Xi} \in B^c} \sum_{i \in B^c} \left( \frac{(\hat{\beta}_{Xi} - \tilde{b}_{Xi})^2}{\hat{\sigma}_{Xi}^2} + \frac{(\hat{\beta}_{Yi} - \tilde{\theta} \tilde{b}_{Xi})^2}{\hat{\sigma}_{Yi}^2} \right)\right) \leq \sum_{i \in B_0^c} \left( \frac{(\hat{\beta}_{Xi} - \beta_{Xi})^2}{\hat{\sigma}_{Xi}^2} + \frac{(\hat{\beta}_{Yi} - \theta \beta_{Xi})^2}{\hat{\sigma}_{Yi}^2} \right) + \log(n)(K_0 - K_1) \rightarrow 0.$$

This gives us  $P(\hat{K} = K_1) \rightarrow 0$  for any  $K_1 < K_0$ . For any  $K_1 > K_0$ , we have

$$\begin{aligned} & P(\hat{K} = K_1) \\ & \leq P\left(\log(n)(K_1 - K_0) \leq \sum_{i \in B_0^c} \left( \frac{(\hat{\beta}_{Xi} - \beta_{Xi})^2}{\hat{\sigma}_{Xi}^2} + \frac{(\hat{\beta}_{Yi} - \theta \beta_{Xi})^2}{\hat{\sigma}_{Yi}^2} \right) - \min_{\hat{\theta}, \tilde{b}_{Xi} \in \hat{B}_{K_1}^c} \sum_{i \in \hat{B}_{K_1}^c} \left( \frac{(\hat{\beta}_{Xi} - \tilde{b}_{Xi})^2}{\hat{\sigma}_{Xi}^2} + \frac{(\hat{\beta}_{Yi} - \tilde{\theta} \tilde{b}_{Xi})^2}{\hat{\sigma}_{Yi}^2} \right)\right) \\ & \leq P\left(\log(n)(K_1 - K_0) \leq \sum_{i \in B_0^c} \left( \frac{(\hat{\beta}_{Xi} - \beta_{Xi})^2}{\hat{\sigma}_{Xi}^2} + \frac{(\hat{\beta}_{Yi} - \theta \beta_{Xi})^2}{\hat{\sigma}_{Yi}^2} \right)\right) \end{aligned}$$

Since  $\sum_{i \in B_0^c} \left( \frac{(\hat{\beta}_{Xi} - \beta_{Xi})^2}{\hat{\sigma}_{Xi}^2} + \frac{(\hat{\beta}_{Yi} - \theta \beta_{Xi})^2}{\hat{\sigma}_{Yi}^2} \right)$  is a central  $\chi^2$  distribution with degrees of freedom  $2(m - K_0)$ , we get  $P(\hat{K} = K_1) \rightarrow 0$  for any  $K_1 > K_0$ . So we have  $P(\hat{K} = K_0) \rightarrow 1$  as  $n_1, n_2 \rightarrow \infty$ .  $\square$

## S2 Standard Error of $\hat{\theta}$

For any given  $K$ , denote the index set of  $K$  non-zero  $\hat{r}_i$ 's as  $\hat{B}_K$ . The  $(m - K + 1)$  by  $(m - K + 1)$  Fisher information matrix is

$$\mathcal{J} = \begin{pmatrix} \frac{\partial^2(-l)}{\partial \theta^2} & \frac{\partial^2(-l)}{\partial \theta \partial \beta'_{XB}} \\ \frac{\partial^2(-l)}{\partial \theta \partial \beta_{XB}} & \frac{\partial^2(-l)}{\partial \beta_{XB} \partial \beta'_{XB}} \end{pmatrix}, \quad (3)$$

where  $\beta_{XB}$  is a vector of elements  $\beta_{Xi}$  with  $i \in \hat{B}_K^c$ . Plug  $\hat{\theta}, \hat{b}_{Xi}$ 's into  $\mathcal{J}$ , we obtain the standard error of  $\hat{\theta}$  as  $\text{SE}(\hat{\theta}) = \sqrt{(\mathcal{J}^{-1})_{11}}$ .

We have

$$\begin{aligned} \frac{\partial^2(-l)}{\partial \theta^2} \Big|_{\hat{\theta}, \hat{b}_{Xi}} &= \sum_{i \in \hat{B}_K^c} \frac{\hat{b}_{Xi}^2}{\hat{\sigma}_{Yi}^2}, \\ \frac{\partial^2(-l)}{\partial \beta_{Xi}^2} \Big|_{\hat{\theta}, \hat{b}_{Xi}} &= \frac{1}{\hat{\sigma}_{Xi}^2} + \frac{\hat{\theta}^2}{\hat{\sigma}_{Yi}^2}, \\ \frac{\partial^2(-l)}{\partial \theta \partial \beta_{Xi}} \Big|_{\hat{\theta}, \hat{b}_{Xi}} &= \frac{2\hat{b}_{Xi}\hat{\theta} - \hat{\beta}_{Yi}}{\hat{\sigma}_{Yi}^2}. \end{aligned} \quad (4)$$

And

$$\begin{aligned} \text{SE}(\hat{\theta}) &= \sqrt{(\mathcal{J}^{-1})_{11}} = \frac{1}{V}, \\ V &= \sum_{i \in \hat{B}_K^c} \frac{\hat{b}_{Xi}^2}{\hat{\sigma}_{Yi}^2} - \sum_{i \in \hat{B}_K^c} \left( \frac{2\hat{b}_{Xi}\hat{\theta} - \hat{\beta}_{Yi}}{\hat{\sigma}_{Yi}^2} \right)^2 \cdot \frac{1}{\frac{1}{\hat{\sigma}_{Xi}^2} + \frac{\hat{\theta}^2}{\hat{\sigma}_{Yi}^2}}. \end{aligned} \quad (5)$$

From our Assumption 2, we get  $n_1, n_2$  are  $O(n)$  for some  $n$ , and  $\hat{\sigma}_{Xi}^2, \hat{\sigma}_{Yi}^2$  are both  $O(1/n)$ . And as  $n \rightarrow \infty$ ,  $\hat{\beta}_{Xi} \rightarrow \beta_{Xi}$  with probability 1, and from the IV Assumption A1 we have  $\beta_{Xi} \neq 0$ . So in Theorem 3.3 of [13], as  $n_1, n_2 \rightarrow \infty$ , i.e.  $n \rightarrow \infty$ ,  $\hat{\sigma}_{Xi}$  and  $\hat{\sigma}_{Yi}$  are both  $o_p(\hat{\beta}_{Xi})$ , we have asymptotic variance of  $\hat{\theta}$  as  $1/V^*$  and

$$V^* = \sum_{i \in \hat{B}_K^c} \frac{\hat{\beta}_{Xi}^2 \hat{\sigma}_{Yi}^2 + \hat{\beta}_{Yi}^2 \hat{\sigma}_{Xi}^2}{(\hat{\theta}^2 \hat{\sigma}_{Xi}^2 + \hat{\sigma}_{Yi}^2)^2}. \quad (6)$$

Since we have

$$\hat{b}_{Xi} = \frac{\frac{\hat{\beta}_{Xi}}{\hat{\sigma}_{Xi}^2} + \frac{\hat{\theta}\hat{\beta}_{Yi}}{\hat{\sigma}_{Yi}^2}}{\frac{1}{\hat{\sigma}_{Xi}^2} + \frac{\hat{\theta}^2}{\hat{\sigma}_{Yi}^2}}. \quad (7)$$

Plug (7) in (5), we get

$$V - V^* = \sum_{i \in \hat{B}_{\hat{K}}^c} -\frac{4\hat{\sigma}_{Xi}^2\hat{\sigma}_{Yi}^2(\hat{\beta}_{Yi} - \hat{\theta}\hat{\beta}_{Xi})^2}{(\hat{\theta}^2\hat{\sigma}_{Xi}^2 + \hat{\sigma}_{Yi}^2)^3} + \frac{2\hat{\sigma}_{Xi}^2\hat{\beta}_{Yi}(\hat{\beta}_{Yi} - \hat{\theta}\hat{\beta}_{Xi})}{(\hat{\theta}^2\hat{\sigma}_{Xi}^2 + \hat{\sigma}_{Yi}^2)^2}. \quad (8)$$

With our Theorem 1 we have  $P(\hat{K} = K_0) \rightarrow 1$  and  $P(\hat{B}_{\hat{K}} = B_0) \rightarrow 1$ , and when  $\hat{B}_{\hat{K}} = B_0$ , we have  $\hat{\beta}_{Yi} - \hat{\theta}\hat{\beta}_{Xi} \rightarrow 0$  for  $i \in \hat{B}_{\hat{K}}^c$ . For the first part in (8), divided by the corresponding part in (6), because  $\hat{\sigma}_{Xi}^2, \hat{\sigma}_{Yi}^2, \hat{\theta}^2\hat{\sigma}_{Xi}^2 + \hat{\sigma}_{Yi}^2, \hat{\beta}_{Xi}^2\hat{\sigma}_{Yi}^2 + \hat{\beta}_{Yi}^2\hat{\sigma}_{Xi}^2$  are all  $O_p(1/n)$  and  $\hat{\beta}_{Yi} - \hat{\theta}\hat{\beta}_{Xi} \rightarrow 0$ , we get

$$-\frac{4\hat{\sigma}_{Xi}^2\hat{\sigma}_{Yi}^2(\hat{\beta}_{Yi} - \hat{\theta}\hat{\beta}_{Xi})^2}{(\hat{\theta}^2\hat{\sigma}_{Xi}^2 + \hat{\sigma}_{Yi}^2)^3} \Big/ \frac{\hat{\beta}_{Xi}^2\hat{\sigma}_{Yi}^2 + \hat{\beta}_{Yi}^2\hat{\sigma}_{Xi}^2}{(\hat{\theta}^2\hat{\sigma}_{Xi}^2 + \hat{\sigma}_{Yi}^2)^2} = -\frac{4\hat{\sigma}_{Xi}^2\hat{\sigma}_{Yi}^2(\hat{\beta}_{Yi} - \hat{\theta}\hat{\beta}_{Xi})^2}{(\hat{\theta}^2\hat{\sigma}_{Xi}^2 + \hat{\sigma}_{Yi}^2)(\hat{\beta}_{Xi}^2\hat{\sigma}_{Yi}^2 + \hat{\beta}_{Yi}^2\hat{\sigma}_{Xi}^2)} \rightarrow 0.$$

Similarly, for the second part in (8), divided by the corresponding part in (6), because  $\hat{\sigma}_{Xi}^2, \hat{\sigma}_{Yi}^2$  are both  $O_p(1/n)$  and  $\hat{\beta}_{Yi} - \hat{\theta}\hat{\beta}_{Xi} \rightarrow 0$ , we get

$$\frac{2\hat{\sigma}_{Xi}^2\hat{\beta}_{Yi}(\hat{\beta}_{Yi} - \hat{\theta}\hat{\beta}_{Xi})}{(\hat{\theta}^2\hat{\sigma}_{Xi}^2 + \hat{\sigma}_{Yi}^2)^2} \Big/ \frac{\hat{\beta}_{Xi}^2\hat{\sigma}_{Yi}^2 + \hat{\beta}_{Yi}^2\hat{\sigma}_{Xi}^2}{(\hat{\theta}^2\hat{\sigma}_{Xi}^2 + \hat{\sigma}_{Yi}^2)^2} = \frac{2\hat{\sigma}_{Xi}^2\hat{\beta}_{Yi}(\hat{\beta}_{Yi} - \hat{\theta}\hat{\beta}_{Xi})}{\hat{\beta}_{Xi}^2\hat{\sigma}_{Yi}^2 + \hat{\beta}_{Yi}^2\hat{\sigma}_{Xi}^2} \rightarrow 0.$$

Hence we have  $V - V^* = o_p(V^*)$ , implying that  $V$  and  $V^*$  are asymptotically equivalent. This shows that our cMLE and the MPLE asymptotically share the same variance; this was also confirmed in our simulations and real data examples.

## S3 Full Real Data Results

### S3.1 Inference and Estimation Results of All Methods

Here we show the full real data results estimating and inferring causal effects of 12 risk factors on 4 common diseases from Table S1 to S4. We implemented cML methods, CAUSE, MR-Mix, MR-ContMix, MR-Lasso, MR-PRESSO, MR-IVW, MR-Egger, MR-Weighted-Median, MR-Weighted-Mode, and MR-RAPS. For cML method with BIC, we could use the smaller one of sample sizes of exposure and outcome (denoted by cML-BIC, cML-MA-BIC, cML-BIC-DP, cML-MA-BIC-DP), or we could use the larger one of them (denoted by cML-BIC-max, cML-MA-BIC-max, cML-BIC-DP-Max, cML-MA-BIC-DP-Max). These two choices give essentially the same results. We can also get  $\hat{\theta}$  and  $SE(\hat{\theta})$  with profile likelihood as described in [13] (denoted by cML-MA-AIC-Profile, cML-AIC-Profile, cML-MA-BIC-max-Profile, cML-BIC-max-Profile, cML-MA-BIC-Profile, and cML-BIC-Profile). These two estimation approaches give almost the same results. For CAUSE, we extract its original results from Supplementary Table 3 of [6].

CAUSE and MR-ContMix do not provide the standard error of estimate, so we show their standard errors as NA.

### S3.2 BIC and Scatter Plots

Table S5 shows the number of IVs used, number of invalid IVs detected by cML-BIC, and the proportion of detected invalid IVs for each exposure-outcome pair, with one default starting point set at 0 and

another 100 randomly generated starting points. Table S6 shows the results for only using the default starting point set at 0. There are 7 pairs giving different numbers of invalid IVs for the two runs with different starting points.

Figure S1 to S4 show BIC and scatter plots for each exposure-outcome pair in primary real data examples.

### S3.3 Goodness-of-Fit Test Results

Tables S7 to S10 show the goodness-of-fit (GOF) test results for the 48 trait pairs. Each cell in each table shows the  $p$ -value of the corresponding GOF test. To calculate the BIC, we could use either the smaller one of the sample sizes for the exposure and the outcome (denoted by GOF1 and GOF2), or we could use the larger one of them (denoted by GOF1-Max and GOF2-Max). These two choices gave essentially the same results.

## S4 Full Secondary Real Data Results

### S4.1 GWAS Data and IV Selection

Table S11 shows the details of GWAS summary data used for the 13 traits in secondary real data examples. For each exposure-outcome pair, we used R package `TwoSampleMR` to select IVs and extract summary statistics following the standard procedure in the package. Here we show the example code for fasting proinsulin as the exposure and age at smoking as the outcome.

```
library(TwoSampleMR)
# ID of Fasting Proinsulin as exposure, ID of Age at Smoking as outcome
exp_id = "ebi-a-GCST001212"
out_id = "ieu-a-964"
# Extract IVs for exposure
exposure_dat <- extract_instruments(exp_id)
# LD-clumping of extracted IVs
exposure_dat <- clump_data(exposure_dat)
# Extract summary statistics of outcome, do not use proxy
outcome_dat <- extract_outcome_data(exposure_dat$SNP, out_id, proxies = 0)
# Harmonize data: correct strand for non-palindromic SNPs, drop all palindromic SNPs
dat <- harmonise_data(exposure_dat, outcome_dat, action = 3)
final_dat = dat[dat$mr_keep,]
# Get final estimates and standard errors for exposure and outcome
b_exp = final_dat$beta.exposure
b_out = final_dat$beta.outcome
se_exp = final_dat$se.exposure
se_out = final_dat$se.outcome
```

### S4.2 Inference and Estimation Results of All Methods

See Table S12 to S18 and Figure S5.

### S4.3 Goodness-of-fit Tests Results

See Table S19 to S25.

## **S5 Full Main Simulation Results**

In our main simulations, we implemented our proposed cML method, MR-Mix, MR-ContMix, MR-Lasso, MR-PRESSO, MR-IVW, MR-IVW-Oracle, MR-Egger, MR-Weighted-Median, MR-Weighted-Mode and MR-RAPS. For cML methods, we could use AIC or BIC to select the best  $K$  (denoted by cML-AIC and cML-BIC), or generate AIC- or BIC-based weights for model averaging (denoted by cML-MA-AIC and cML-MA-BIC). We could use our iterative algorithm to get the constrained maximum likelihood estimate  $\hat{\theta}$ , and its standard error  $SE(\hat{\theta})$  with Fisher's information matrix as described in Section 4.4 (denoted by cML-MA-AIC, cML-AIC, cML-MA-BIC, and cML-BIC); or get  $\hat{\theta}$  and  $SE(\hat{\theta})$  with the profile likelihood as described in [13] (denoted by cML-MA-AIC-Profile, cML-AIC-Profile, cML-MA-BIC-Profile, and cML-BIC-Profile). The two likelihood approaches gave almost the same results.

### **S5.1 Inference and Estimation Results**

Table S26 to S88 show the inference and estimation results for the main simulations for  $m = 10, 20, 100$ , the ideal case with  $q = 0$ , and  $q = 0.2, 0.4, 0.6$  with the InSIDE assumption holding or violated, and  $n = 50000, 100000, 200000$ .

MR-ContMix does not provide the standard error of an estimate, so we show its mean standard error as NA.

### **S5.2 Selection Results**

Tables S89 to S94 show the relative frequencies of cML-BIC's selecting  $\hat{K} = K_0$ . We can see that, for each set-up, as  $n$  increased from 50000 to 200000, the relative frequencies of the correct selection also increased.

### **S5.3 Type-I Errors Based on 10,000 Simulations**

In Figure 2 of the main text, we showed type-I errors of different methods for 10 setups based on 1000 simulations. We increased the number of simulations for each of these 10 setups to 10,000 and calculated the empirical type-I errors of different methods as shown in Figure S6.

### **S5.4 Data Perturbation Results**

#### **S5.4.1 Inference and Estimation Results**

See Table S95 to S103.

#### **S5.4.2 Goodness-of-Fit Test Results**

See Table S104 to S106.

## **S6 Full Secondary Simulation Results**

See Figure S7 and S8.

## S7 Full Simulation Results with Weak Invalid IVs

### S7.1 Inference and Estimation Results

See Table S107 to S114.

### S7.2 Goodness-of-Fit Test Results

See Table S115 to S119.

### S7.3 cML-MA-BIC and cML-MA-BIC-DP with Valid IVs

In the simulation setup 30 of 50 SNPs were invalid IVs while the other 20 were valid IVs. For valid IVs, their effects  $\gamma_i$ 's on  $X$  were generated from  $N(0, h_x/m)$ , where  $h_x = 0.5$ ,  $m = 50$ , and pleiotropic effects  $\alpha_i$ 's and  $\phi_i$ 's were 0. We can see that the IV effects  $\gamma_i$ 's were weaker than in those in the Main simulations.

We applied cML-MA-BIC, cML-BIC, cML-MA-BIC-DP and cML-BIC-DP (with  $T = 200$ ) to the simulated data with only 20 valid IVs. Note that, since  $h_y$  only affected  $\alpha_i$ 's of invalid IVs, the results were the same for  $h_y = 0.1, 0.2, 0.4, 0.6$  as we only used 20 valid IVs. Table S120 shows the results. For cML-MA-BIC, cML-BIC, cML-MA-BIC-DP and cML-BIC-DP, in each cell from top to bottom are power/type-I error,  $\text{Mean}(\hat{\theta})$ ,  $\text{SD}(\hat{\theta})$ , and  $\text{Mean}(\text{SE}(\hat{\theta}))$ . For GOF1 and GOF2, the cells show the relative frequencies of their rejecting the null. The methods appeared to perform well.

## S8 Computational Time

We compared the computational time taken by different methods. For cML-MA-BIC we tried with 0 or 5 random starting points (in addition to the single default starting point). For cML-MA-BIC-DP we set the number of data perturbations  $T = 200$  and tried with 0 or 5 random starting points (in addition to the single default starting point) for each perturbed dataset. For MR-ContMix we set  $\text{CIMin} = -0.5$ ,  $\text{CIMax} = 0.5$ ,  $\text{CISStep} = 0.0001$ . For MR-RAPS we set  $\text{over.dispersion} = \text{TRUE}$ ,  $\text{loss.function} = \text{"tukey"}$ . All other methods were implemented with their default parameters. Since CAUSE took a much longer running time, we did not include it for comparison.

We generated the simulated data following Section 2.9.3 in the Main text. We tried different numbers of IVs  $m = 10, 20, 50, 70$  and 100, and set  $h_y = 0.2$ ,  $\theta = 0$ , and 60% IVs as invalid IVs. For each  $m$  we did 10 simulations and applied different methods, counted each one's average running time over the 10 simulations. Table S121 shows the results. All methods were run on a 2016 MacBook Pro with a 2.7 GHz Intel Core i5 processor and 8 GB memory.

## Supplemental References

1. Benyamin, B., Pourcain, B., Davis, O. S., Davies, G., Hansell, N. K., Brion, M. J., ... & Visscher, P. M. (2014). Childhood intelligence is heritable, highly polygenic and associated with FBNP1L. *Molecular psychiatry*, 19(2), 253-258.
2. Boraska, V., Franklin, C. S., Floyd, J. A., Thornton, L. M., Huckins, L. M., Southam, L., ... & Navratilova, M. (2014). A genome-wide association study of anorexia nervosa. *Molecular psychiatry*, 19(10), 1085-1094.

3. Dupuis, J., Langenberg, C., Prokopenko, I., Saxena, R., Soranzo, N., Jackson, A. U., ... & Orrù, M. (2010). New genetic loci implicated in fasting glucose homeostasis and their impact on type 2 diabetes risk. *Nature genetics*, 42(2), 105-116.
4. Furberg, H., Kim, Y., Dackor, J., Boerwinkle, E., Franceschini, N., Ardissino, D., ... & Tobacco and Genetics Consortium. (2010). Genome-wide meta-analyses identify multiple loci associated with smoking behavior. *Nature genetics*, 42(5), 441.
5. Morris, A. P., Voight, B. F., Teslovich, T. M., Ferreira, T., Segre, A. V., Steinthorsdottir, V., ... & NjøLstad, I. (2012). Large-scale association analysis provides insights into the genetic architecture and pathophysiology of type 2 diabetes. *Nature genetics*, 44(9), 981.
6. Morrison, J., Knoblauch, N., Marcus, J. H., Stephens, M., & He, X. (2020). Mendelian randomization accounting for correlated and uncorrelated pleiotropic effects using genome-wide summary statistics. *Nature Genetics*, 52(7), 740-747.
7. Okada, Y., Wu, D., Trynka, G., Raj, T., Terao, C., Ikari, K., ... & Plenge, R. M. (2014). Genetics of rheumatoid arthritis contributes to biology and drug discovery. *Nature*, 506(7488), 376-381.
8. Schizophrenia Working Group of the Psychiatric Genomics Consortium. (2014). Biological insights from 108 schizophrenia-associated genetic loci. *Nature*, 511(7510), 421-427.
9. Strawbridge, R. J., Dupuis, J., Prokopenko, I., Barker, A., Ahlqvist, E., Rybin, D., ... & C4D Consortium. (2011). Genome-wide association identifies nine common variants associated with fasting proinsulin levels and provides new insights into the pathophysiology of type 2 diabetes. *Diabetes*, 60(10), 2624-2634.
10. Taal, H. R., St Pourcain, B., Thiering, E., Das, S., Mook-Kanamori, D. O., Warrington, N. M., ... & Jaddoe, V. W. (2012). Common variants at 12q15 and 12q24 are associated with infant head circumference. *Nature genetics*, 44(5), 532-538.
11. Willer, C. J., Schmidt, E. M., Sengupta, S., Peloso, G. M., Gustafsson, S., Kanoni, S., ... & Assimes, T. L. (2013). Discovery and refinement of loci associated with lipid levels. *Nature genetics*, 45(11), 1274.
12. Wood, A. R., Esko, T., Yang, J., Vedantam, S., Pers, T. H., Gustafsson, S., ... & Lichtner, P. (2014). Defining the role of common variation in the genomic and biological architecture of adult human height. *Nature genetics*, 46(11), 1173-1186.
13. Zhao, Q., Wang, J., Hemani, G., Bowden, J., & Small, D. S. (2020). Statistical inference in two-sample summary-data Mendelian randomization using robust adjusted profile score. *Annals of Statistics*, 48(3), 1742-1769.
